# Supplementary material
Source: MDPI journal article supplement (https://www.mdpi.com/2304-6740/3/2/82)
Supplement: s1 [file s1]

data_mh1_178_2
_publ_requested_journal          inorganics
_publ_contact_author_name        'Dr Chris Ritchie'
_publ_contact_author_address     
;School of Chemistry
The University of Melbourne
Parkville 
Victoria
3010
Australia
;
_publ_contact_author_email       critchie@unimelb.edu.au
loop_
_publ_author_name
_publ_author_address
'Healey, Merinda R.'
;School of Chemistry
The University of Melbourne
Parkville 
Victoria
3010
Australia
;
'Goerigk, Lars'
;School of Chemistry
The University of Melbourne
Parkville 
Victoria
3010
Australia
;
_audit_creation_date             2015-03-19
_audit_creation_method           
;
Olex2 1.2
(compiled 2015.01.26 svn.r3150 for OlexSys, GUI svn.r4998)
;
_publ_section_references         
;
Dolomanov, O.V., Bourhis, L.J., Gildea, R.J, Howard, J.A.K. & Puschmann, H.
 (2009), J. Appl. Cryst. 42, 339-341.

Sheldrick, G.M. (2008). Acta Cryst. A64, 112-122.

Sheldrick, G.M. (2015). Acta Cryst. A71, 3-8.
;
_chemical_name_common            ?
_chemical_name_systematic        ?
_chemical_formula_moiety         'C16 H36 N, C13 H12 Br Mo6 N O18 S'
_chemical_formula_sum            'C45 H84 Br Mo6 N3 O18 S'
_chemical_formula_weight         1642.76
_chemical_melting_point          ?
_chemical_oxdiff_formula         Mo6O18N3C45H84S1Br
loop_
_atom_type_symbol
_atom_type_description
_atom_type_scat_dispersion_real
_atom_type_scat_dispersion_imag
_atom_type_scat_source
N N 0.0311 0.0180 'International Tables Vol C Tables 4.2.6.8 and 6.1.1.4'
O O 0.0492 0.0322 'International Tables Vol C Tables 4.2.6.8 and 6.1.1.4'
Mo Mo -0.0483 2.7339 'International Tables Vol C Tables 4.2.6.8 and 6.1.1.4'
C C 0.0181 0.0091 'International Tables Vol C Tables 4.2.6.8 and 6.1.1.4'
Br Br -0.6763 1.2805 'International Tables Vol C Tables 4.2.6.8 and 6.1.1.4'
S S 0.3331 0.5567 'International Tables Vol C Tables 4.2.6.8 and 6.1.1.4'
H H 0.0000 0.0000 'International Tables Vol C Tables 4.2.6.8 and 6.1.1.4'

_shelx_space_group_comment       
;
The symmetry employed for this shelxl refinement is uniquely defined
by the following loop, which should always be used as a source of
symmetry information in preference to the above space-group names.
They are only intended as comments.
;
_space_group_crystal_system      monoclinic
_space_group_IT_number           14
_space_group_name_H-M_alt        'P 1 21/n 1'
_space_group_name_Hall           '-P 2yn'
loop_
_space_group_symop_operation_xyz
'x, y, z'
'-x+1/2, y+1/2, -z+1/2'
'-x, -y, -z'
'x-1/2, -y-1/2, z-1/2'

_cell_length_a                   11.03023(16)
_cell_length_b                   16.9232(2)
_cell_length_c                   32.4507(5)
_cell_angle_alpha                90
_cell_angle_beta                 98.8238(13)
_cell_angle_gamma                90
_cell_volume                     5985.79(15)
_cell_formula_units_Z            4
_cell_measurement_reflns_used    25171
_cell_measurement_temperature    130.01(10)
_cell_measurement_theta_max      76.9020
_cell_measurement_theta_min      4.8000
_shelx_estimated_absorpt_T_max   ?
_shelx_estimated_absorpt_T_min   ?
_exptl_absorpt_coefficient_mu    11.658
_exptl_absorpt_correction_T_max  0.686
_exptl_absorpt_correction_T_min  0.229
_exptl_absorpt_correction_type   analytical
_exptl_absorpt_process_details   
;
CrysAlisPro, Agilent Technologies,
Version 1.171.36.28 (release 01-02-2013 CrysAlis171 .NET)
(compiled Feb  1 2013,16:14:44)
Analytical numeric absorption correction using a multifaceted crystal
			model based on expressions derived by R.C. Clark & J.S. Reid.
(Clark, R. C. & Reid, J. S. (1995). Acta Cryst. A51, 887-897)
;
_exptl_absorpt_special_details   ?
_exptl_crystal_colour            red
_exptl_crystal_density_diffrn    1.823
_exptl_crystal_density_meas      ?
_exptl_crystal_density_method    ?
_exptl_crystal_description       plate
_exptl_crystal_F_000             3288
_exptl_crystal_size_max          0.2905
_exptl_crystal_size_mid          0.1781
_exptl_crystal_size_min          0.0576
_exptl_transmission_factor_max   ?
_exptl_transmission_factor_min   ?
_diffrn_reflns_av_R_equivalents  0.0690
_diffrn_reflns_av_unetI/netI     0.0418
_diffrn_reflns_Laue_measured_fraction_full 0.991
_diffrn_reflns_Laue_measured_fraction_max 0.989
_diffrn_reflns_limit_h_max       13
_diffrn_reflns_limit_h_min       -13
_diffrn_reflns_limit_k_max       20
_diffrn_reflns_limit_k_min       -21
_diffrn_reflns_limit_l_max       41
_diffrn_reflns_limit_l_min       -35
_diffrn_reflns_number            105913
_diffrn_reflns_point_group_measured_fraction_full 0.991
_diffrn_reflns_point_group_measured_fraction_max 0.989
_diffrn_reflns_theta_full        67.684
_diffrn_reflns_theta_max         77.284
_diffrn_reflns_theta_min         2.953
_diffrn_ambient_environment      N~2~
_diffrn_ambient_temperature      130.01(10)
_diffrn_detector                 'CCD plate'
_diffrn_detector_area_resol_mean 10.2273
_diffrn_detector_type            Atlas
_diffrn_measured_fraction_theta_full 0.991
_diffrn_measured_fraction_theta_max 0.989
_diffrn_measurement_details      
;
#__ type_ start__ end____ width___ exp.time_
  1 omega  -16.00   33.00   1.0000    2.0700
omega____ theta____ kappa____ phi______ frames
    -      -40.8092   37.0000   60.0000 49

#__ type_ start__ end____ width___ exp.time_
  2 omega   33.00   99.00   1.0000    2.0700
omega____ theta____ kappa____ phi______ frames
    -       40.8092   37.0000  120.0000 66

#__ type_ start__ end____ width___ exp.time_
  3 omega   54.00   80.00   1.0000    8.2900
omega____ theta____ kappa____ phi______ frames
    -      113.0000   -6.0000   55.4954 26

#__ type_ start__ end____ width___ exp.time_
  4 omega   77.00  129.00   1.0000    8.2900
omega____ theta____ kappa____ phi______ frames
    -      113.0000   15.0000   60.0000 52

#__ type_ start__ end____ width___ exp.time_
  5 omega  148.00  174.00   1.0000    8.2900
omega____ theta____ kappa____ phi______ frames
    -      113.0000   -6.0000   55.4954 26

#__ type_ start__ end____ width___ exp.time_
  6 omega  145.00  172.00   1.0000    8.2900
omega____ theta____ kappa____ phi______ frames
    -      113.0000  -15.0000    0.0000 27

#__ type_ start__ end____ width___ exp.time_
  7 omega  147.00  173.00   1.0000    8.2900
omega____ theta____ kappa____ phi______ frames
    -      113.0000   30.0000  -90.0000 26

#__ type_ start__ end____ width___ exp.time_
  8 omega  131.00  178.00   1.0000    8.2900
omega____ theta____ kappa____ phi______ frames
    -      113.0000   61.0000  -90.0000 47

#__ type_ start__ end____ width___ exp.time_
  9 omega  146.00  178.00   1.0000    8.2900
omega____ theta____ kappa____ phi______ frames
    -      113.0000  111.0000 -180.0000 32

#__ type_ start__ end____ width___ exp.time_
 10 omega  118.00  148.00   1.0000    8.2900
omega____ theta____ kappa____ phi______ frames
    -      113.0000  178.0000 -180.0000 30

#__ type_ start__ end____ width___ exp.time_
 11 omega  119.00  145.00   1.0000    8.2900
omega____ theta____ kappa____ phi______ frames
    -      113.0000  178.0000 -150.0000 26

#__ type_ start__ end____ width___ exp.time_
 12 omega  111.00  150.00   1.0000    8.2900
omega____ theta____ kappa____ phi______ frames
    -      113.0000  111.0000  -90.0000 39

#__ type_ start__ end____ width___ exp.time_
 13 omega  109.00  137.00   1.0000    8.2900
omega____ theta____ kappa____ phi______ frames
    -      113.0000  111.0000 -180.0000 28

#__ type_ start__ end____ width___ exp.time_
 14 omega   84.00  146.00   1.0000    8.2900
omega____ theta____ kappa____ phi______ frames
    -      113.0000   61.0000 -120.0000 62

#__ type_ start__ end____ width___ exp.time_
 15 omega  120.00  149.00   1.0000    8.2900
omega____ theta____ kappa____ phi______ frames
    -      113.0000   15.0000  -90.0000 29

#__ type_ start__ end____ width___ exp.time_
 16 omega  110.00  149.00   1.0000    8.2900
omega____ theta____ kappa____ phi______ frames
    -      113.0000  -15.0000 -150.0000 39

#__ type_ start__ end____ width___ exp.time_
 17 omega  109.00  138.00   1.0000    8.2900
omega____ theta____ kappa____ phi______ frames
    -      113.0000  -61.0000  -60.0000 29

#__ type_ start__ end____ width___ exp.time_
 18 omega  100.00  136.00   1.0000    8.2900
omega____ theta____ kappa____ phi______ frames
    -      113.0000  -76.0000  -72.5198 36

#__ type_ start__ end____ width___ exp.time_
 19 omega   95.00  121.00   1.0000    8.2900
omega____ theta____ kappa____ phi______ frames
    -      113.0000  -61.0000 -150.0000 26

#__ type_ start__ end____ width___ exp.time_
 20 omega   91.00  116.00   1.0000    8.2900
omega____ theta____ kappa____ phi______ frames
    -      113.0000 -111.0000 -150.0000 25

#__ type_ start__ end____ width___ exp.time_
 21 omega   89.00  115.00   1.0000    8.2900
omega____ theta____ kappa____ phi______ frames
    -      113.0000 -111.0000 -120.0000 26

#__ type_ start__ end____ width___ exp.time_
 22 omega   85.00  115.00   1.0000    8.2900
omega____ theta____ kappa____ phi______ frames
    -      113.0000 -111.0000 -180.0000 30

#__ type_ start__ end____ width___ exp.time_
 23 omega   74.00  115.00   1.0000    8.2900
omega____ theta____ kappa____ phi______ frames
    -      113.0000 -111.0000  -90.0000 41

#__ type_ start__ end____ width___ exp.time_
 24 omega   81.00  107.00   1.0000    8.2900
omega____ theta____ kappa____ phi______ frames
    -      113.0000  -82.0000  -95.9691 26

#__ type_ start__ end____ width___ exp.time_
 25 omega   82.00  108.00   1.0000    8.2900
omega____ theta____ kappa____ phi______ frames
    -      113.0000  -61.0000  -60.0000 26

#__ type_ start__ end____ width___ exp.time_
 26 omega   91.00  117.00   1.0000    8.2900
omega____ theta____ kappa____ phi______ frames
    -      113.0000  -77.0000    0.0000 26

#__ type_ start__ end____ width___ exp.time_
 27 omega   90.00  116.00   1.0000    8.2900
omega____ theta____ kappa____ phi______ frames
    -      113.0000 -111.0000   30.0000 26

#__ type_ start__ end____ width___ exp.time_
 28 omega  106.00  132.00   1.0000    8.2900
omega____ theta____ kappa____ phi______ frames
    -      113.0000  -86.0000   62.4933 26

#__ type_ start__ end____ width___ exp.time_
 29 omega  103.00  128.00   1.0000    8.2900
omega____ theta____ kappa____ phi______ frames
    -      113.0000  -77.0000   60.0000 25

#__ type_ start__ end____ width___ exp.time_
 30 omega   90.00  116.00   1.0000    8.2900
omega____ theta____ kappa____ phi______ frames
    -      113.0000 -111.0000  120.0000 26

#__ type_ start__ end____ width___ exp.time_
 31 omega   85.00  115.00   1.0000    8.2900
omega____ theta____ kappa____ phi______ frames
    -      113.0000 -111.0000   60.0000 30

#__ type_ start__ end____ width___ exp.time_
 32 omega   74.00  100.00   1.0000    8.2900
omega____ theta____ kappa____ phi______ frames
    -      113.0000  -63.0000   94.3951 26

#__ type_ start__ end____ width___ exp.time_
 33 omega   65.00   92.00   1.0000    8.2900
omega____ theta____ kappa____ phi______ frames
    -      113.0000  -39.0000   41.9902 27

#__ type_ start__ end____ width___ exp.time_
 34 omega   89.00  119.00   1.0000    8.2900
omega____ theta____ kappa____ phi______ frames
    -      113.0000  -61.0000   30.0000 30

#__ type_ start__ end____ width___ exp.time_
 35 omega  108.00  147.00   1.0000    8.2900
omega____ theta____ kappa____ phi______ frames
    -      113.0000   -6.0000   55.4954 39

#__ type_ start__ end____ width___ exp.time_
 36 omega   99.00  177.00   1.0000    8.2900
omega____ theta____ kappa____ phi______ frames
    -      113.0000   45.0000   60.0000 78

#__ type_ start__ end____ width___ exp.time_
 37 omega  142.00  174.00   1.0000    8.2900
omega____ theta____ kappa____ phi______ frames
    -      113.0000   77.0000  120.0000 32

#__ type_ start__ end____ width___ exp.time_
 38 omega  105.00  131.00   1.0000    8.2900
omega____ theta____ kappa____ phi______ frames
    -      113.0000  178.0000   30.0000 26

#__ type_ start__ end____ width___ exp.time_
 39 omega  115.00  146.00   1.0000    8.2900
omega____ theta____ kappa____ phi______ frames
    -      113.0000  178.0000  -30.0000 31

#__ type_ start__ end____ width___ exp.time_
 40 omega   91.00  118.00   1.0000    8.2900
omega____ theta____ kappa____ phi______ frames
    -      113.0000  178.0000  -60.0000 27

#__ type_ start__ end____ width___ exp.time_
 41 omega   58.00   94.00   1.0000    8.2900
omega____ theta____ kappa____ phi______ frames
    -      113.0000  178.0000 -180.0000 36

#__ type_ start__ end____ width___ exp.time_
 42 omega   89.00  114.00   1.0000    8.2900
omega____ theta____ kappa____ phi______ frames
    -      113.0000   77.0000  -90.0000 25

#__ type_ start__ end____ width___ exp.time_
 43 omega   84.00  173.00   1.0000    8.2900
omega____ theta____ kappa____ phi______ frames
    -      113.0000   61.0000  -60.0000 89

#__ type_ start__ end____ width___ exp.time_
 44 omega   83.00  127.00   1.0000    8.2900
omega____ theta____ kappa____ phi______ frames
    -      113.0000   30.0000   60.0000 44

#__ type_ start__ end____ width___ exp.time_
 45 omega   61.00  114.00   1.0000    8.2900
omega____ theta____ kappa____ phi______ frames
    -      113.0000  -15.0000    0.0000 53

#__ type_ start__ end____ width___ exp.time_
 46 omega   64.00   94.00   1.0000    8.2900
omega____ theta____ kappa____ phi______ frames
    -      113.0000  -86.0000   62.4933 30

#__ type_ start__ end____ width___ exp.time_
 47 omega   69.00  110.00   1.0000    8.2900
omega____ theta____ kappa____ phi______ frames
    -      113.0000 -111.0000    0.0000 41

#__ type_ start__ end____ width___ exp.time_
 48 omega   91.00  116.00   1.0000    8.2900
omega____ theta____ kappa____ phi______ frames
    -      113.0000 -111.0000  -30.0000 25

#__ type_ start__ end____ width___ exp.time_
 49 omega   62.00  102.00   1.0000    8.2900
omega____ theta____ kappa____ phi______ frames
    -      113.0000  -94.0000  -30.0000 40

#__ type_ start__ end____ width___ exp.time_
 50 omega   51.00   95.00   1.0000    8.2900
omega____ theta____ kappa____ phi______ frames
    -      113.0000  -51.0000  -28.4478 44

#__ type_ start__ end____ width___ exp.time_
 51 omega   51.00   87.00   1.0000    8.2900
omega____ theta____ kappa____ phi______ frames
    -      113.0000  -45.0000   30.0000 36

#__ type_ start__ end____ width___ exp.time_
 52 omega   57.00  104.00   1.0000    8.2900
omega____ theta____ kappa____ phi______ frames
    -      113.0000  -94.0000   90.0000 47

#__ type_ start__ end____ width___ exp.time_
 53 omega   63.00  112.00   1.0000    8.2900
omega____ theta____ kappa____ phi______ frames
    -      113.0000 -111.0000  150.0000 49

#__ type_ start__ end____ width___ exp.time_
 54 omega   50.00   76.00   1.0000    8.2900
omega____ theta____ kappa____ phi______ frames
    -      113.0000  -94.0000  150.0000 26

#__ type_ start__ end____ width___ exp.time_
 55 omega   44.00   69.00   1.0000    8.2900
omega____ theta____ kappa____ phi______ frames
    -      113.0000  -63.0000   94.3951 25

#__ type_ start__ end____ width___ exp.time_
 56 omega   35.00   79.00   1.0000    8.2900
omega____ theta____ kappa____ phi______ frames
    -      113.0000  -30.0000   30.0000 44

#__ type_ start__ end____ width___ exp.time_
 57 omega   48.00   74.00   1.0000    8.2900
omega____ theta____ kappa____ phi______ frames
    -      113.0000  -45.0000  -60.0000 26

#__ type_ start__ end____ width___ exp.time_
 58 omega   39.00   86.00   1.0000    8.2900
omega____ theta____ kappa____ phi______ frames
    -      113.0000  -45.0000 -120.0000 47

#__ type_ start__ end____ width___ exp.time_
 59 omega   60.00   85.00   1.0000    8.2900
omega____ theta____ kappa____ phi______ frames
    -      113.0000  -30.0000 -150.0000 25

#__ type_ start__ end____ width___ exp.time_
 60 omega   53.00  102.00   1.0000    8.2900
omega____ theta____ kappa____ phi______ frames
    -      113.0000   15.0000  -90.0000 49

#__ type_ start__ end____ width___ exp.time_
 61 omega   45.00   84.00   1.0000    8.2900
omega____ theta____ kappa____ phi______ frames
    -      113.0000  -15.0000 -150.0000 39

#__ type_ start__ end____ width___ exp.time_
 62 omega   38.00   63.00   1.0000    8.2900
omega____ theta____ kappa____ phi______ frames
    -      113.0000  -76.0000  -72.5198 25

#__ type_ start__ end____ width___ exp.time_
 63 omega   45.00  103.00   1.0000    8.2900
omega____ theta____ kappa____ phi______ frames
    -      113.0000  -94.0000  -90.0000 58

#__ type_ start__ end____ width___ exp.time_
 64 omega   50.00   96.00   1.0000    8.2900
omega____ theta____ kappa____ phi______ frames
    -      113.0000  -94.0000 -180.0000 46

#__ type_ start__ end____ width___ exp.time_
 65 omega   44.00   78.00   1.0000    8.2900
omega____ theta____ kappa____ phi______ frames
    -      113.0000 -111.0000 -150.0000 34

#__ type_ start__ end____ width___ exp.time_
 66 omega   47.00   73.00   1.0000    8.2900
omega____ theta____ kappa____ phi______ frames
    -      113.0000 -111.0000 -120.0000 26

#__ type_ start__ end____ width___ exp.time_
 67 omega   42.00   68.00   1.0000    8.2900
omega____ theta____ kappa____ phi______ frames
    -      113.0000 -111.0000  -90.0000 26

#__ type_ start__ end____ width___ exp.time_
 68 omega   37.00   97.00   1.0000    8.2900
omega____ theta____ kappa____ phi______ frames
    -      113.0000  -94.0000 -150.0000 60

#__ type_ start__ end____ width___ exp.time_
 69 omega   44.00   69.00   1.0000    8.2900
omega____ theta____ kappa____ phi______ frames
    -      113.0000 -111.0000 -180.0000 25

#__ type_ start__ end____ width___ exp.time_
 70 omega   35.00   97.00   1.0000    8.2900
omega____ theta____ kappa____ phi______ frames
    -      113.0000  -94.0000 -120.0000 62

#__ type_ start__ end____ width___ exp.time_
 71 omega   39.00   98.00   1.0000    8.2900
omega____ theta____ kappa____ phi______ frames
    -      113.0000  -45.0000  -90.0000 59

#__ type_ start__ end____ width___ exp.time_
 72 omega   39.00   90.00   1.0000    8.2900
omega____ theta____ kappa____ phi______ frames
    -      113.0000  -45.0000  -30.0000 51

#__ type_ start__ end____ width___ exp.time_
 73 omega   46.00   76.00   1.0000    8.2900
omega____ theta____ kappa____ phi______ frames
    -      113.0000  -30.0000  -90.0000 30

#__ type_ start__ end____ width___ exp.time_
 74 omega   29.00   82.00   1.0000    2.0700
omega____ theta____ kappa____ phi______ frames
    -       40.8092 -125.0000  -90.0000 53

#__ type_ start__ end____ width___ exp.time_
 75 omega   44.00   75.00   1.0000    2.0700
omega____ theta____ kappa____ phi______ frames
    -       40.8092 -125.0000 -180.0000 31

#__ type_ start__ end____ width___ exp.time_
 76 omega  -49.00   33.00   1.0000    2.0700
omega____ theta____ kappa____ phi______ frames
    -      -40.8092   37.0000 -150.0000 82

#__ type_ start__ end____ width___ exp.time_
 77 omega  -57.00  -26.00   1.0000    2.0700
omega____ theta____ kappa____ phi______ frames
    -      -40.8092  -37.0000   60.0000 31

#__ type_ start__ end____ width___ exp.time_
 78 omega -115.00 -103.00   1.0000    2.0700
omega____ theta____ kappa____ phi______ frames
    -      -40.8092  -57.0000  -90.0000 12
;
_diffrn_measurement_device       'four-circle diffractometer'
_diffrn_measurement_device_type  'SuperNova, Dual, Cu at zero, Atlas'
_diffrn_measurement_method       '\w scans'
_diffrn_orient_matrix_UB_11      0.0312702000
_diffrn_orient_matrix_UB_12      -0.0716694000
_diffrn_orient_matrix_UB_13      -0.0256696000
_diffrn_orient_matrix_UB_21      0.1290431000
_diffrn_orient_matrix_UB_22      -0.0037428000
_diffrn_orient_matrix_UB_23      0.0260331000
_diffrn_orient_matrix_UB_31      -0.0485277000
_diffrn_orient_matrix_UB_32      -0.0559874000
_diffrn_orient_matrix_UB_33      0.0311656000
_diffrn_radiation_monochromator  mirror
_diffrn_radiation_probe          x-ray
_diffrn_radiation_type           CuK\a
_diffrn_radiation_wavelength     1.54184
_diffrn_source                   'sealed X-ray tube'
_diffrn_source_type              'SuperNova (Cu) X-ray Source'
_reflns_Friedel_coverage         0.000
_reflns_Friedel_fraction_full    .
_reflns_Friedel_fraction_max     .
_reflns_number_gt                10120
_reflns_number_total             12538
_reflns_odcompleteness_completeness 98.72
_reflns_odcompleteness_iscentric 1
_reflns_odcompleteness_theta     77.17
_reflns_special_details          
;
 Reflections were merged by SHELXL according to the crystal
 class for the calculation of statistics and refinement.
 
 _reflns_Friedel_fraction is defined as the number of unique
 Friedel pairs measured divided by the number that would be
 possible theoretically, ignoring centric projections and
 systematic absences.
;
_reflns_threshold_expression     'I > 2\s(I)'
_computing_cell_refinement       
;
CrysAlisPro, Agilent Technologies,
Version 1.171.36.28 (release 01-02-2013 CrysAlis171 .NET)
(compiled Feb  1 2013,16:14:44)
;
_computing_data_collection       
;
CrysAlisPro, Agilent Technologies,
Version 1.171.36.28 (release 01-02-2013 CrysAlis171 .NET)
(compiled Feb  1 2013,16:14:44)
;
_computing_data_reduction        
;
CrysAlisPro, Agilent Technologies,
Version 1.171.36.28 (release 01-02-2013 CrysAlis171 .NET)
(compiled Feb  1 2013,16:14:44)
;
_computing_molecular_graphics    'Olex2 (Dolomanov et al., 2009)'
_computing_publication_material  'Olex2 (Dolomanov et al., 2009)'
_computing_structure_refinement  'ShelXL (Sheldrick, 2008)'
_computing_structure_solution    'ShelXT (Sheldrick, 2015)'
_refine_diff_density_max         3.864
_refine_diff_density_min         -3.320
_refine_diff_density_rms         0.176
_refine_ls_extinction_coef       .
_refine_ls_extinction_method     none
_refine_ls_goodness_of_fit_ref   1.131
_refine_ls_hydrogen_treatment    constr
_refine_ls_matrix_type           full
_refine_ls_number_parameters     504
_refine_ls_number_reflns         12538
_refine_ls_number_restraints     24
_refine_ls_R_factor_all          0.0898
_refine_ls_R_factor_gt           0.0790
_refine_ls_restrained_S_all      1.140
_refine_ls_shift/su_max          0.001
_refine_ls_shift/su_mean         0.000
_refine_ls_structure_factor_coef Fsqd
_refine_ls_weighting_details     
'w=1/[\s^2^(Fo^2^)+(0.1435P)^2^+14.6971P] where P=(Fo^2^+2Fc^2^)/3'
_refine_ls_weighting_scheme      calc
_refine_ls_wR_factor_gt          0.2332
_refine_ls_wR_factor_ref         0.2471
_refine_special_details          ?
_olex2_refinement_description    
;
1. Fixed Uiso
 At 1.2 times of:
  All C(H) groups, All C(H,H) groups
 At 1.5 times of:
  All C(H,H,H) groups
2. Shared sites
{C15, Br1}
{C14, Br2}
3. Restrained distances
 C32-C34
 1.5 with sigma of 0.02
 C33-C35
 1.5 with sigma of 0.02
 C32-C30
 1.5 with sigma of 0.02
 C30-C33
 1.5 with sigma of 0.02
 C13-C15
 1.5 with sigma of 0.02
 C12-C14
 1.5 with sigma of 0.02
 C9-C11
 1.35 with sigma of 0.02
 C12-C13
 1.35 with sigma of 0.02
 C10-C12
 1.41 with sigma of 0.02
 C11-C13
 1.41 with sigma of 0.02
 C9-S1
 1.7 with sigma of 0.02
 S1-C12
 1.7 with sigma of 0.02
 C9-S2
 1.7 with sigma of 0.02
 S2-C13
 1.7 with sigma of 0.02
 C29-C31
 1.5 with sigma of 0.02
 C30-C29
 1.5 with sigma of 0.02
 C26-C25
 1.5 with sigma of 0.02
 C26-C25
 1.53 with sigma of 0.02
 C30-C34
 2.5 with sigma of 0.04
 C35-C30
 2.5 with sigma of 0.04
 C10-S2
 2.55 with sigma of 0.04
 S1-C13
 2.55 with sigma of 0.04
 S1-C11
 2.55 with sigma of 0.04
 C12-S2
 2.55 with sigma of 0.04
4. Uiso/Uaniso restraints and constraints
Uiso(C15) = Uiso(Br1)
Uiso(C14) = Uiso(Br2)
Uiso(S2) = Uiso(S1)
Uiso(C33) = Uiso(C35) = Uiso(C32) = Uiso(C34)
Uiso(C11) = Uiso(C10)
5. Others
 Sof(C29)=Sof(H29A)=Sof(H29B)=Sof(C31)=Sof(H31A)=Sof(H31B)=Sof(C33)=Sof(H33A)=
 Sof(H33B)=Sof(C35)=Sof(H35A)=Sof(H35B)=Sof(H35C)=1-FVAR(1)
 Sof(C28)=Sof(H28A)=Sof(H28B)=Sof(C30)=Sof(H30A)=Sof(H30B)=Sof(C32)=Sof(H32A)=
 Sof(H32B)=Sof(C34)=Sof(H34A)=Sof(H34B)=Sof(H34C)=FVAR(1)
 Sof(C11)=Sof(H11)=Sof(C14)=Sof(H14A)=Sof(H14B)=Sof(H14C)=Sof(S1)=Sof(Br1)=1-
 FVAR(2)
 Sof(C10)=Sof(H10)=Sof(C15)=Sof(H15A)=Sof(H15B)=Sof(H15C)=Sof(S2)=Sof(Br2)=
 FVAR(2)
6.a Secondary CH2 refined with riding coordinates:
 C16(H16A,H16B), C17(H17A,H17B), C18(H18A,H18B), C20(H20A,H20B), C21(H21A,
 H21B), C22(H22A,H22B), C24(H24A,H24B), C25(H25A,H25B), C26(H26A,H26B),
 C28(H28A,H28B), C29(H29A,H29B), C30(H30A,H30B), C31(H31A,H31B), C32(H32A,H32B),
  C33(H33A,H33B)
6.b Aromatic/amide H refined with riding coordinates:
 C6(H6), C7(H7), C10(H10), C11(H11)
6.c Idealised Me refined as rotating group:
 C19(H19A,H19B,H19C), C23(H23A,H23B,H23C), C27(H27A,H27B,H27C), C34(H34A,H34B,
 H34C), C35(H35A,H35B,H35C), C4(H4A,H4B,H4C), C5(H5A,H5B,H5C), C14(H14A,H14B,
 H14C), C15(H15A,H15B,H15C)
;
_atom_sites_solution_hydrogens   geom
_atom_sites_solution_primary     direct
_atom_sites_solution_secondary   ?
loop_
_atom_site_label
_atom_site_type_symbol
_atom_site_fract_x
_atom_site_fract_y
_atom_site_fract_z
_atom_site_U_iso_or_equiv
_atom_site_adp_type
_atom_site_occupancy
_atom_site_site_symmetry_order
_atom_site_calc_flag
_atom_site_refinement_flags_posn
_atom_site_refinement_flags_adp
_atom_site_refinement_flags_occupancy
_atom_site_disorder_assembly
_atom_site_disorder_group
C16 C 1.0396(11) -1.3360(7) 0.7920(3) 0.080(3) Uani 1 1 d . . . . .
H16A H 1.0830 -1.3404 0.8202 0.096 Uiso 1 1 calc R . . . .
H16B H 0.9898 -1.2885 0.7904 0.096 Uiso 1 1 calc R . . . .
C17 C 1.1332(14) -1.3281(10) 0.7619(4) 0.101(4) Uani 1 1 d . . . . .
H17A H 1.1836 -1.3753 0.7636 0.121 Uiso 1 1 calc R . . . .
H17B H 1.0898 -1.3243 0.7336 0.121 Uiso 1 1 calc R . . . .
C18 C 1.2137(16) -1.2584(12) 0.7707(5) 0.115(5) Uani 1 1 d . . . . .
H18A H 1.2519 -1.2589 0.7996 0.138 Uiso 1 1 calc R . . . .
H18B H 1.1655 -1.2104 0.7657 0.138 Uiso 1 1 calc R . . . .
C19 C 1.3135(19) -1.2599(15) 0.7421(5) 0.135(7) Uani 1 1 d . . . . .
H19A H 1.2778 -1.2768 0.7146 0.202 Uiso 1 1 calc GR . . . .
H19B H 1.3773 -1.2960 0.7533 0.202 Uiso 1 1 calc GR . . . .
H19C H 1.3473 -1.2079 0.7406 0.202 Uiso 1 1 calc GR . . . .
C20 C 0.8818(12) -1.3996(7) 0.7387(3) 0.078(3) Uani 1 1 d . . . . .
H20A H 0.9374 -1.4021 0.7183 0.094 Uiso 1 1 calc R . . . .
H20B H 0.8279 -1.4451 0.7343 0.094 Uiso 1 1 calc R . . . .
C21 C 0.8057(11) -1.3260(6) 0.7311(3) 0.074(2) Uani 1 1 d . . . . .
H21A H 0.7632 -1.3163 0.7546 0.088 Uiso 1 1 calc R . . . .
H21B H 0.8586 -1.2812 0.7283 0.088 Uiso 1 1 calc R . . . .
C22 C 0.7141(13) -1.3349(8) 0.6921(5) 0.095(4) Uani 1 1 d . . . . .
H22A H 0.7575 -1.3435 0.6687 0.114 Uiso 1 1 calc R . . . .
H22B H 0.6639 -1.3811 0.6948 0.114 Uiso 1 1 calc R . . . .
C23 C 0.6323(16) -1.2642(10) 0.6833(5) 0.117(6) Uani 1 1 d . . . . .
H23A H 0.5672 -1.2762 0.6610 0.175 Uiso 1 1 calc GR . . . .
H23B H 0.6791 -1.2204 0.6754 0.175 Uiso 1 1 calc GR . . . .
H23C H 0.5981 -1.2506 0.7078 0.175 Uiso 1 1 calc GR . . . .
C24 C 0.8690(13) -1.4071(7) 0.8155(3) 0.084(3) Uani 1 1 d . . . . .
H24A H 0.9140 -1.4229 0.8423 0.101 Uiso 1 1 calc R . . . .
H24B H 0.8373 -1.3543 0.8185 0.101 Uiso 1 1 calc R . . . .
C25 C 0.761(2) -1.4644(10) 0.8033(5) 0.126(7) Uani 1 1 d D . . . .
H25A H 0.6989 -1.4389 0.7832 0.152 Uiso 1 1 calc R . . . .
H25B H 0.7894 -1.5109 0.7902 0.152 Uiso 1 1 calc R . . . .
C26 C 0.705(2) -1.4887(10) 0.8405(5) 0.126(6) Uani 1 1 d D . . . .
H26A H 0.6855 -1.4417 0.8553 0.151 Uiso 1 1 calc R . . . .
H26B H 0.7647 -1.5190 0.8591 0.151 Uiso 1 1 calc R . . . .
C27 C 0.588(3) -1.5385(13) 0.8293(7) 0.160(10) Uani 1 1 d . . . . .
H27A H 0.6039 -1.5824 0.8123 0.240 Uiso 1 1 calc GR . . . .
H27B H 0.5238 -1.5064 0.8144 0.240 Uiso 1 1 calc GR . . . .
H27C H 0.5618 -1.5578 0.8545 0.240 Uiso 1 1 calc GR . . . .
C28 C 1.014(2) -1.4857(13) 0.7858(6) 0.075(5) Uiso 0.57(2) 1 d . . P A 2
H28A H 1.0575 -1.4925 0.7622 0.089 Uiso 0.57(2) 1 calc R . P A 2
H28B H 0.9484 -1.5242 0.7830 0.089 Uiso 0.57(2) 1 calc R . P A 2
C29 C 1.055(2) -1.4747(14) 0.7833(6) 0.061(5) Uiso 0.43(2) 1 d D . P A 1
H29A H 1.0103 -1.5240 0.7790 0.074 Uiso 0.43(2) 1 calc R . P A 1
H29B H 1.0974 -1.4673 0.7595 0.074 Uiso 0.43(2) 1 calc R . P A 1
C30 C 1.106(2) -1.5060(14) 0.8264(6) 0.088(6) Uiso 0.57(2) 1 d D . P A 2
H30A H 1.1778 -1.4727 0.8281 0.106 Uiso 0.57(2) 1 calc R . P A 2
H30B H 1.0667 -1.4957 0.8507 0.106 Uiso 0.57(2) 1 calc R . P A 2
C31 C 1.151(3) -1.4839(17) 0.8213(7) 0.077(6) Uiso 0.43(2) 1 d D . P A 1
H31A H 1.1158 -1.4729 0.8464 0.093 Uiso 0.43(2) 1 calc R . P A 1
H31B H 1.2184 -1.4478 0.8202 0.093 Uiso 0.43(2) 1 calc R . P A 1
C32 C 1.143(3) -1.5915(16) 0.8260(12) 0.141(7) Uiso 0.57(2) 1 d D . P A 2
H32A H 1.0737 -1.6244 0.8299 0.169 Uiso 0.57(2) 1 calc R . P A 2
H32B H 1.1654 -1.6041 0.7990 0.169 Uiso 0.57(2) 1 calc R . P A 2
C33 C 1.196(3) -1.571(2) 0.8215(17) 0.141(7) Uiso 0.43(2) 1 d D . P A 1
H33A H 1.1737 -1.6013 0.8444 0.169 Uiso 0.43(2) 1 calc R . P A 1
H33B H 1.1703 -1.5974 0.7952 0.169 Uiso 0.43(2) 1 calc R . P A 1
C34 C 1.248(3) -1.611(2) 0.8591(11) 0.141(7) Uiso 0.57(2) 1 d D . P A 2
H34A H 1.2973 -1.5642 0.8658 0.211 Uiso 0.57(2) 1 calc GR . P A 2
H34B H 1.2977 -1.6512 0.8492 0.211 Uiso 0.57(2) 1 calc GR . P A 2
H34C H 1.2179 -1.6291 0.8835 0.211 Uiso 0.57(2) 1 calc GR . P A 2
C35 C 1.327(3) -1.547(3) 0.8278(16) 0.141(7) Uiso 0.43(2) 1 d D . P A 1
H35A H 1.3469 -1.5237 0.8027 0.211 Uiso 0.43(2) 1 calc GR . P A 1
H35B H 1.3777 -1.5930 0.8347 0.211 Uiso 0.43(2) 1 calc GR . P A 1
H35C H 1.3425 -1.5095 0.8502 0.211 Uiso 0.43(2) 1 calc GR . P A 1
N2 N 0.9580(10) -1.4054(5) 0.7828(3) 0.077(2) Uani 1 1 d . . . . .
C1 C 0.4479(8) -1.8198(5) 0.5785(2) 0.0565(17) Uani 1 1 d . . . . .
C2 C 0.4716(9) -1.8939(6) 0.5614(3) 0.064(2) Uani 1 1 d . . . . .
C3 C 0.3337(8) -1.8009(5) 0.5894(3) 0.0555(16) Uani 1 1 d . . . . .
C4 C 0.5958(10) -1.9152(7) 0.5524(4) 0.078(3) Uani 1 1 d . . . . .
H4A H 0.6218 -1.8769 0.5337 0.116 Uiso 1 1 calc GR . . . .
H4B H 0.5930 -1.9665 0.5397 0.116 Uiso 1 1 calc GR . . . .
H4C H 0.6528 -1.9158 0.5779 0.116 Uiso 1 1 calc GR . . . .
C5 C 0.3143(9) -1.7207(5) 0.6075(3) 0.0634(19) Uani 1 1 d . . . . .
H5A H 0.3728 -1.7128 0.6322 0.095 Uiso 1 1 calc GR . . . .
H5B H 0.2327 -1.7176 0.6143 0.095 Uiso 1 1 calc GR . . . .
H5C H 0.3249 -1.6806 0.5874 0.095 Uiso 1 1 calc GR . . . .
C6 C 0.3746(8) -1.9472(5) 0.5555(3) 0.0593(18) Uani 1 1 d . . . . .
H6 H 0.3886 -1.9968 0.5448 0.071 Uiso 1 1 calc R . . . .
C7 C 0.2407(8) -1.8565(5) 0.5824(3) 0.0590(18) Uani 1 1 d . . . . .
H7 H 0.1646 -1.8446 0.5898 0.071 Uiso 1 1 calc R . . . .
C8 C 0.2581(8) -1.9308(6) 0.5644(3) 0.0616(19) Uani 1 1 d . . . . .
C9 C 0.1604(8) -1.9892(5) 0.5564(3) 0.0639(19) Uani 1 1 d D . . . .
C10 C 0.1508(16) -2.0600(11) 0.5377(6) 0.076(4) Uiso 0.580(4) 1 d D . P B 1
H10 H 0.2213 -2.0804 0.5292 0.091 Uiso 0.580(4) 1 calc R . P B 1
C11 C 0.0472(17) -1.9988(14) 0.5673(8) 0.076(4) Uiso 0.420(4) 1 d D . P B 2
H11 H 0.0211 -1.9636 0.5861 0.091 Uiso 0.420(4) 1 calc R . P B 2
C12 C 0.0419(9) -2.1070(7) 0.5297(4) 0.091(3) Uani 1 1 d D . . . .
C13 C -0.0338(9) -2.0621(6) 0.5507(4) 0.078(3) Uani 1 1 d D . . . .
C14 C 0.02155(19) -2.19369(13) 0.50443(6) 0.0817(6) Uiso 0.420(4) 1 d D . P B 1
H14A H 0.0890 -2.2282 0.5141 0.123 Uiso 0.420(4) 1 calc GR . P B 1
H14B H 0.0176 -2.1850 0.4750 0.123 Uiso 0.420(4) 1 calc GR . P B 1
H14C H -0.0535 -2.2175 0.5097 0.123 Uiso 0.420(4) 1 calc GR . P B 1
C15 C -0.1811(3) -2.0815(2) 0.55395(11) 0.1015(10) Uiso 0.580(4) 1 d D . P B 1
H15A H -0.2329 -2.0555 0.5315 0.152 Uiso 0.580(4) 1 calc GR . P B 1
H15B H -0.1999 -2.0625 0.5801 0.152 Uiso 0.580(4) 1 calc GR . P B 1
H15C H -0.1948 -2.1375 0.5520 0.152 Uiso 0.580(4) 1 calc GR . P B 1
N1 N 0.5430(7) -1.7683(5) 0.5854(2) 0.0616(16) Uani 1 1 d . . . . .
O1 O 0.6428(5) -1.7033(3) 0.66329(18) 0.0546(12) Uani 1 1 d . . . . .
O2 O 0.6054(5) -1.6030(4) 0.59766(18) 0.0591(13) Uani 1 1 d . . . . .
O3 O 0.7573(6) -1.6937(4) 0.55732(18) 0.0621(14) Uani 1 1 d . . . . .
O4 O 0.7911(5) -1.7934(3) 0.62347(18) 0.0573(12) Uani 1 1 d . . . . .
O5 O 0.9648(6) -1.6342(5) 0.5251(2) 0.0720(17) Uani 1 1 d . . . . .
O6 O 0.9812(6) -1.7296(4) 0.5957(2) 0.0667(15) Uani 1 1 d . . . . .
O7 O 1.0248(6) -1.5728(4) 0.6061(2) 0.0636(14) Uani 1 1 d . . . . .
O8 O 0.8011(6) -1.5437(4) 0.56758(17) 0.0638(14) Uani 1 1 d . . . . .
O9 O 0.8317(4) -1.6395(3) 0.63292(15) 0.0491(11) Uani 1 1 d . . . . .
O10 O 0.6481(6) -1.4374(4) 0.6022(2) 0.0655(14) Uani 1 1 d . . . . .
O11 O 0.6886(5) -1.5461(3) 0.67160(17) 0.0535(11) Uani 1 1 d . . . . .
O12 O 0.8793(5) -1.4865(3) 0.64465(18) 0.0553(12) Uani 1 1 d . . . . .
O13 O 1.0234(7) -1.8391(5) 0.6661(3) 0.0799(19) Uani 1 1 d . . . . .
O14 O 0.8670(5) -1.7339(4) 0.70049(18) 0.0563(12) Uani 1 1 d . . . . .
O15 O 1.0583(5) -1.6712(4) 0.66989(19) 0.0609(14) Uani 1 1 d . . . . .
O16 O 0.7062(6) -1.6385(4) 0.7435(2) 0.0613(13) Uani 1 1 d . . . . .
O17 O 0.9122(5) -1.5840(4) 0.70893(17) 0.0543(12) Uani 1 1 d . . . . .
O18 O 1.1180(6) -1.5087(5) 0.6871(2) 0.0683(16) Uani 1 1 d . . . . .
S1 S 0.1851(6) -2.0745(4) 0.52753(19) 0.0673(7) Uiso 0.420(4) 1 d D . P B 2
S2 S 0.0182(4) -1.9744(3) 0.57419(14) 0.0673(7) Uiso 0.580(4) 1 d D . P B 1
Br1 Br -0.1811(3) -2.0815(2) 0.55395(11) 0.1015(10) Uiso 0.420(4) 1 d . . P B 2
Br2 Br 0.02155(19) -2.19369(13) 0.50443(6) 0.0817(6) Uiso 0.580(4) 1 d . . P B
1
Mo1 Mo 0.67121(6) -1.70854(4) 0.60411(2) 0.05531(19) Uani 1 1 d . . . . .
Mo2 Mo 0.91294(6) -1.63972(5) 0.57116(2) 0.0597(2) Uani 1 1 d . . . . .
Mo3 Mo 0.72771(6) -1.52153(4) 0.61340(2) 0.05378(18) Uani 1 1 d . . . . .
Mo4 Mo 0.93928(7) -1.75602(4) 0.65380(2) 0.0606(2) Uani 1 1 d . . . . .
Mo5 Mo 0.75390(6) -1.63777(4) 0.69663(2) 0.05054(18) Uani 1 1 d . . . . .
Mo6 Mo 1.00001(5) -1.56599(4) 0.66449(2) 0.05301(18) Uani 1 1 d . . . . .

loop_
_atom_site_aniso_label
_atom_site_aniso_U_11
_atom_site_aniso_U_22
_atom_site_aniso_U_33
_atom_site_aniso_U_23
_atom_site_aniso_U_13
_atom_site_aniso_U_12
C16 0.084(7) 0.084(7) 0.069(5) -0.018(5) 0.000(5) 0.010(5)
C17 0.096(9) 0.114(11) 0.093(8) -0.036(8) 0.010(7) -0.012(8)
C18 0.100(10) 0.148(15) 0.093(9) -0.023(9) 0.000(7) -0.031(10)
C19 0.129(15) 0.18(2) 0.093(10) -0.011(11) 0.017(9) -0.031(14)
C20 0.097(7) 0.076(6) 0.060(5) -0.014(4) 0.007(5) 0.008(5)
C21 0.082(6) 0.068(6) 0.070(5) -0.016(4) 0.011(5) 0.003(5)
C22 0.093(8) 0.069(6) 0.112(9) -0.027(6) -0.018(7) 0.003(6)
C23 0.114(11) 0.109(11) 0.115(10) -0.044(9) -0.022(9) 0.025(9)
C24 0.115(9) 0.076(6) 0.060(5) -0.013(5) 0.009(5) -0.007(6)
C25 0.167(18) 0.091(10) 0.131(13) -0.025(9) 0.055(12) -0.041(11)
C26 0.152(16) 0.086(9) 0.143(14) -0.036(10) 0.035(12) -0.030(10)
C27 0.21(3) 0.112(14) 0.164(18) -0.039(13) 0.054(18) -0.073(16)
N2 0.102(6) 0.064(5) 0.063(4) -0.015(4) 0.004(4) 0.006(4)
C1 0.058(4) 0.061(4) 0.048(4) 0.001(3) 0.002(3) -0.010(3)
C2 0.061(5) 0.076(6) 0.055(4) -0.015(4) 0.013(3) -0.010(4)
C3 0.058(4) 0.049(4) 0.057(4) -0.005(3) 0.002(3) -0.004(3)
C4 0.063(5) 0.089(7) 0.086(6) -0.027(5) 0.025(5) -0.008(5)
C5 0.065(5) 0.051(4) 0.071(5) -0.005(4) -0.001(4) 0.003(3)
C6 0.063(5) 0.058(4) 0.058(4) -0.015(3) 0.011(3) -0.003(3)
C7 0.055(4) 0.061(5) 0.059(4) -0.009(3) 0.004(3) 0.003(3)
C8 0.059(4) 0.061(5) 0.063(4) -0.012(4) 0.004(4) -0.007(4)
C9 0.060(5) 0.062(5) 0.071(5) -0.006(4) 0.013(4) -0.004(4)
C12 0.064(6) 0.102(9) 0.106(8) 0.018(7) 0.011(6) 0.007(6)
C13 0.073(6) 0.065(5) 0.091(7) -0.002(5) -0.004(5) 0.002(4)
N1 0.058(4) 0.065(4) 0.059(4) -0.007(3) -0.001(3) -0.013(3)
O1 0.050(3) 0.049(3) 0.066(3) 0.000(2) 0.013(2) -0.005(2)
O2 0.045(3) 0.066(3) 0.064(3) 0.001(3) -0.001(2) -0.007(2)
O3 0.055(3) 0.076(4) 0.054(3) -0.014(3) 0.007(2) -0.014(3)
O4 0.055(3) 0.053(3) 0.063(3) -0.008(2) 0.006(2) -0.001(2)
O5 0.066(4) 0.092(5) 0.061(3) -0.010(3) 0.020(3) -0.006(3)
O6 0.059(3) 0.078(4) 0.066(3) -0.020(3) 0.017(3) 0.003(3)
O7 0.051(3) 0.079(4) 0.064(3) -0.010(3) 0.019(2) -0.010(3)
O8 0.075(4) 0.066(3) 0.049(3) 0.007(2) 0.004(3) -0.007(3)
O9 0.043(2) 0.052(3) 0.052(3) -0.006(2) 0.005(2) -0.0011(19)
O10 0.069(4) 0.059(3) 0.069(3) 0.007(3) 0.010(3) 0.005(3)
O11 0.050(3) 0.051(3) 0.061(3) -0.004(2) 0.017(2) -0.005(2)
O12 0.055(3) 0.051(3) 0.061(3) -0.002(2) 0.013(2) -0.010(2)
O13 0.074(4) 0.065(4) 0.096(5) -0.008(4) 0.001(4) 0.018(3)
O14 0.057(3) 0.055(3) 0.058(3) 0.002(2) 0.010(2) 0.005(2)
O15 0.043(3) 0.077(4) 0.061(3) -0.012(3) 0.002(2) 0.004(2)
O16 0.066(3) 0.056(3) 0.065(3) 0.003(3) 0.019(3) -0.002(3)
O17 0.046(3) 0.063(3) 0.053(3) -0.009(2) 0.008(2) 0.000(2)
O18 0.052(3) 0.089(5) 0.063(3) -0.019(3) 0.007(2) -0.015(3)
Mo1 0.0503(3) 0.0566(4) 0.0579(3) -0.0058(3) 0.0044(3) -0.0092(2)
Mo2 0.0565(4) 0.0724(4) 0.0516(3) -0.0107(3) 0.0133(3) -0.0062(3)
Mo3 0.0512(3) 0.0531(3) 0.0566(3) 0.0026(2) 0.0069(2) -0.0004(2)
Mo4 0.0560(4) 0.0583(4) 0.0671(4) -0.0079(3) 0.0080(3) 0.0089(3)
Mo5 0.0499(3) 0.0480(3) 0.0553(3) -0.0012(2) 0.0132(2) -0.0029(2)
Mo6 0.0414(3) 0.0640(4) 0.0539(3) -0.0104(3) 0.0081(2) -0.0085(2)

_geom_special_details            
;
 All esds (except the esd in the dihedral angle between two l.s. planes)
 are estimated using the full covariance matrix.  The cell esds are taken
 into account individually in the estimation of esds in distances, angles
 and torsion angles; correlations between esds in cell parameters are only
 used when they are defined by crystal symmetry.  An approximate (isotropic)
 treatment of cell esds is used for estimating esds involving l.s. planes.
;
loop_
_geom_bond_atom_site_label_1
_geom_bond_atom_site_label_2
_geom_bond_distance
_geom_bond_site_symmetry_2
_geom_bond_publ_flag
C16 H16A 0.9700 . ?
C16 H16B 0.9700 . ?
C16 C17 1.533(19) . ?
C16 N2 1.482(16) . ?
C17 H17A 0.9700 . ?
C17 H17B 0.9700 . ?
C17 C18 1.48(2) . ?
C18 H18A 0.9700 . ?
C18 H18B 0.9700 . ?
C18 C19 1.54(2) . ?
C19 H19A 0.9600 . ?
C19 H19B 0.9600 . ?
C19 H19C 0.9600 . ?
C20 H20A 0.9700 . ?
C20 H20B 0.9700 . ?
C20 C21 1.500(15) . ?
C20 N2 1.548(13) . ?
C21 H21A 0.9700 . ?
C21 H21B 0.9700 . ?
C21 C22 1.500(16) . ?
C22 H22A 0.9700 . ?
C22 H22B 0.9700 . ?
C22 C23 1.50(2) . ?
C23 H23A 0.9600 . ?
C23 H23B 0.9600 . ?
C23 H23C 0.9600 . ?
C24 H24A 0.9700 . ?
C24 H24B 0.9700 . ?
C24 C25 1.54(2) . ?
C24 N2 1.552(16) . ?
C25 H25A 0.9700 . ?
C25 H25B 0.9700 . ?
C25 C26 1.495(12) . ?
C26 H26A 0.9700 . ?
C26 H26B 0.9700 . ?
C26 C27 1.54(3) . ?
C27 H27A 0.9600 . ?
C27 H27B 0.9600 . ?
C27 H27C 0.9600 . ?
C28 H28A 0.9700 . ?
C28 H28B 0.9700 . ?
C28 C30 1.57(3) . ?
C28 N2 1.49(2) . ?
C29 H29A 0.9700 . ?
C29 H29B 0.9700 . ?
C29 C31 1.505(18) . ?
C29 N2 1.59(2) . ?
C30 H30A 0.9700 . ?
C30 H30B 0.9700 . ?
C30 C32 1.506(19) . ?
C31 H31A 0.9700 . ?
C31 H31B 0.9700 . ?
C31 C33 1.55(4) . ?
C32 H32A 0.9700 . ?
C32 H32B 0.9700 . ?
C32 C34 1.490(19) . ?
C33 H33A 0.9700 . ?
C33 H33B 0.9700 . ?
C33 C35 1.488(19) . ?
C34 H34A 0.9600 . ?
C34 H34B 0.9600 . ?
C34 H34C 0.9600 . ?
C35 H35A 0.9600 . ?
C35 H35B 0.9600 . ?
C35 H35C 0.9600 . ?
C1 C2 1.412(13) . ?
C1 C3 1.396(13) . ?
C1 N1 1.356(11) . ?
C2 C4 1.488(13) . ?
C2 C6 1.390(13) . ?
C3 C5 1.507(12) . ?
C3 C7 1.385(12) . ?
C4 H4A 0.9600 . ?
C4 H4B 0.9600 . ?
C4 H4C 0.9600 . ?
C5 H5A 0.9600 . ?
C5 H5B 0.9600 . ?
C5 H5C 0.9600 . ?
C6 H6 0.9300 . ?
C6 C8 1.387(13) . ?
C7 H7 0.9300 . ?
C7 C8 1.412(12) . ?
C8 C9 1.455(12) . ?
C9 C10 1.34(2) . ?
C9 C11 1.360(16) . ?
C9 S1 1.765(10) . ?
C9 S2 1.771(9) . ?
C10 H10 0.9300 . ?
C10 C12 1.432(16) . ?
C11 H11 0.9300 . ?
C11 C13 1.445(16) . ?
C12 C13 1.383(13) . ?
C12 C14 1.679(11) . ?
C12 S1 1.685(11) . ?
C13 C15 1.676(10) . ?
C13 S2 1.726(10) . ?
C13 Br1 1.676(10) . ?
C14 H14A 0.9600 . ?
C14 H14B 0.9600 . ?
C14 H14C 0.9600 . ?
C15 H15A 0.9600 . ?
C15 H15B 0.9600 . ?
C15 H15C 0.9600 . ?
N1 Mo1 1.768(7) . ?
O1 Mo1 1.995(6) . ?
O1 Mo5 1.870(6) . ?
O2 Mo1 1.926(7) . ?
O2 Mo3 1.942(6) . ?
O3 Mo1 1.927(6) . ?
O3 Mo2 1.936(6) . ?
O4 Mo1 1.988(6) . ?
O4 Mo4 1.883(6) . ?
O5 Mo2 1.683(6) . ?
O6 Mo2 1.825(8) . ?
O6 Mo4 2.058(7) . ?
O7 Mo2 1.914(6) . ?
O7 Mo6 1.957(6) . ?
O8 Mo2 2.032(7) . ?
O8 Mo3 1.837(6) . ?
O9 Mo1 2.205(5) . ?
O9 Mo2 2.318(5) . ?
O9 Mo3 2.341(5) . ?
O9 Mo4 2.347(5) . ?
O9 Mo5 2.357(5) . ?
O9 Mo6 2.337(5) . ?
O10 Mo3 1.684(6) . ?
O11 Mo3 2.044(5) . ?
O11 Mo5 1.845(6) . ?
O12 Mo3 1.912(6) . ?
O12 Mo6 1.932(6) . ?
O13 Mo4 1.698(7) . ?
O14 Mo4 1.855(6) . ?
O14 Mo5 2.042(6) . ?
O15 Mo4 1.960(6) . ?
O15 Mo6 1.893(7) . ?
O16 Mo5 1.683(6) . ?
O17 Mo5 1.955(6) . ?
O17 Mo6 1.882(6) . ?
O18 Mo6 1.696(6) . ?

loop_
_geom_angle_atom_site_label_1
_geom_angle_atom_site_label_2
_geom_angle_atom_site_label_3
_geom_angle
_geom_angle_site_symmetry_1
_geom_angle_site_symmetry_3
_geom_angle_publ_flag
H16A C16 H16B 107.8 . . ?
C17 C16 H16A 109.0 . . ?
C17 C16 H16B 109.0 . . ?
N2 C16 H16A 109.0 . . ?
N2 C16 H16B 109.0 . . ?
N2 C16 C17 113.0(9) . . ?
C16 C17 H17A 109.0 . . ?
C16 C17 H17B 109.0 . . ?
H17A C17 H17B 107.8 . . ?
C18 C17 C16 113.0(12) . . ?
C18 C17 H17A 109.0 . . ?
C18 C17 H17B 109.0 . . ?
C17 C18 H18A 109.8 . . ?
C17 C18 H18B 109.8 . . ?
C17 C18 C19 109.5(15) . . ?
H18A C18 H18B 108.2 . . ?
C19 C18 H18A 109.8 . . ?
C19 C18 H18B 109.8 . . ?
C18 C19 H19A 109.5 . . ?
C18 C19 H19B 109.5 . . ?
C18 C19 H19C 109.5 . . ?
H19A C19 H19B 109.5 . . ?
H19A C19 H19C 109.5 . . ?
H19B C19 H19C 109.5 . . ?
H20A C20 H20B 107.6 . . ?
C21 C20 H20A 108.6 . . ?
C21 C20 H20B 108.6 . . ?
C21 C20 N2 114.6(8) . . ?
N2 C20 H20A 108.6 . . ?
N2 C20 H20B 108.6 . . ?
C20 C21 H21A 109.6 . . ?
C20 C21 H21B 109.6 . . ?
H21A C21 H21B 108.1 . . ?
C22 C21 C20 110.2(9) . . ?
C22 C21 H21A 109.6 . . ?
C22 C21 H21B 109.6 . . ?
C21 C22 H22A 109.0 . . ?
C21 C22 H22B 109.0 . . ?
H22A C22 H22B 107.8 . . ?
C23 C22 C21 112.9(10) . . ?
C23 C22 H22A 109.0 . . ?
C23 C22 H22B 109.0 . . ?
C22 C23 H23A 109.5 . . ?
C22 C23 H23B 109.5 . . ?
C22 C23 H23C 109.5 . . ?
H23A C23 H23B 109.5 . . ?
H23A C23 H23C 109.5 . . ?
H23B C23 H23C 109.5 . . ?
H24A C24 H24B 107.8 . . ?
C25 C24 H24A 109.1 . . ?
C25 C24 H24B 109.1 . . ?
C25 C24 N2 112.5(9) . . ?
N2 C24 H24A 109.1 . . ?
N2 C24 H24B 109.1 . . ?
C24 C25 H25A 109.4 . . ?
C24 C25 H25B 109.4 . . ?
H25A C25 H25B 108.0 . . ?
C26 C25 C24 111.4(14) . . ?
C26 C25 H25A 109.4 . . ?
C26 C25 H25B 109.4 . . ?
C25 C26 H26A 108.9 . . ?
C25 C26 H26B 108.9 . . ?
C25 C26 C27 113.3(16) . . ?
H26A C26 H26B 107.7 . . ?
C27 C26 H26A 108.9 . . ?
C27 C26 H26B 108.9 . . ?
C26 C27 H27A 109.5 . . ?
C26 C27 H27B 109.5 . . ?
C26 C27 H27C 109.5 . . ?
H27A C27 H27B 109.5 . . ?
H27A C27 H27C 109.5 . . ?
H27B C27 H27C 109.5 . . ?
H28A C28 H28B 107.2 . . ?
C30 C28 H28A 107.9 . . ?
C30 C28 H28B 107.9 . . ?
N2 C28 H28A 107.9 . . ?
N2 C28 H28B 107.9 . . ?
N2 C28 C30 117.5(17) . . ?
H29A C29 H29B 107.1 . . ?
C31 C29 H29A 107.8 . . ?
C31 C29 H29B 107.8 . . ?
C31 C29 N2 118.1(18) . . ?
N2 C29 H29A 107.8 . . ?
N2 C29 H29B 107.8 . . ?
C28 C30 H30A 109.6 . . ?
C28 C30 H30B 109.6 . . ?
H30A C30 H30B 108.1 . . ?
C32 C30 C28 110(2) . . ?
C32 C30 H30A 109.6 . . ?
C32 C30 H30B 109.6 . . ?
C29 C31 H31A 110.4 . . ?
C29 C31 H31B 110.4 . . ?
C29 C31 C33 107(3) . . ?
H31A C31 H31B 108.6 . . ?
C33 C31 H31A 110.4 . . ?
C33 C31 H31B 110.4 . . ?
C30 C32 H32A 109.0 . . ?
C30 C32 H32B 109.0 . . ?
H32A C32 H32B 107.8 . . ?
C34 C32 C30 113(2) . . ?
C34 C32 H32A 109.0 . . ?
C34 C32 H32B 109.0 . . ?
C31 C33 H33A 113.1 . . ?
C31 C33 H33B 113.1 . . ?
H33A C33 H33B 110.5 . . ?
C35 C33 C31 93(3) . . ?
C35 C33 H33A 113.1 . . ?
C35 C33 H33B 113.1 . . ?
C32 C34 H34A 109.5 . . ?
C32 C34 H34B 109.5 . . ?
C32 C34 H34C 109.5 . . ?
H34A C34 H34B 109.5 . . ?
H34A C34 H34C 109.5 . . ?
H34B C34 H34C 109.5 . . ?
C33 C35 H35A 109.5 . . ?
C33 C35 H35B 109.5 . . ?
C33 C35 H35C 109.5 . . ?
H35A C35 H35B 109.5 . . ?
H35A C35 H35C 109.5 . . ?
H35B C35 H35C 109.5 . . ?
C16 N2 C20 111.2(9) . . ?
C16 N2 C24 107.8(8) . . ?
C16 N2 C28 118.4(14) . . ?
C16 N2 C29 101.2(13) . . ?
C20 N2 C24 108.8(9) . . ?
C20 N2 C29 109.0(9) . . ?
C24 N2 C29 118.5(12) . . ?
C28 N2 C20 106.3(10) . . ?
C28 N2 C24 103.9(13) . . ?
C3 C1 C2 122.1(8) . . ?
N1 C1 C2 116.8(8) . . ?
N1 C1 C3 121.1(8) . . ?
C1 C2 C4 121.6(8) . . ?
C6 C2 C1 116.5(8) . . ?
C6 C2 C4 121.9(9) . . ?
C1 C3 C5 119.5(8) . . ?
C7 C3 C1 118.5(8) . . ?
C7 C3 C5 122.0(8) . . ?
C2 C4 H4A 109.5 . . ?
C2 C4 H4B 109.5 . . ?
C2 C4 H4C 109.5 . . ?
H4A C4 H4B 109.5 . . ?
H4A C4 H4C 109.5 . . ?
H4B C4 H4C 109.5 . . ?
C3 C5 H5A 109.5 . . ?
C3 C5 H5B 109.5 . . ?
C3 C5 H5C 109.5 . . ?
H5A C5 H5B 109.5 . . ?
H5A C5 H5C 109.5 . . ?
H5B C5 H5C 109.5 . . ?
C2 C6 H6 118.0 . . ?
C8 C6 C2 124.0(8) . . ?
C8 C6 H6 118.0 . . ?
C3 C7 H7 119.0 . . ?
C3 C7 C8 121.9(8) . . ?
C8 C7 H7 119.0 . . ?
C6 C8 C7 117.0(8) . . ?
C6 C8 C9 120.7(8) . . ?
C7 C8 C9 122.3(8) . . ?
C8 C9 S1 118.7(7) . . ?
C8 C9 S2 121.0(7) . . ?
C10 C9 C8 133.9(10) . . ?
C10 C9 S2 105.2(10) . . ?
C11 C9 C8 136.0(11) . . ?
C11 C9 S1 105.2(11) . . ?
C9 C10 H10 117.1 . . ?
C9 C10 C12 125.8(16) . . ?
C12 C10 H10 117.1 . . ?
C9 C11 H11 118.9 . . ?
C9 C11 C13 122.1(16) . . ?
C13 C11 H11 118.9 . . ?
C10 C12 C14 128.3(11) . . ?
C13 C12 C10 99.1(12) . . ?
C13 C12 C14 132.5(8) . . ?
C13 C12 S1 118.9(9) . . ?
C11 C13 Br1 132.1(10) . . ?
C12 C13 C11 101.9(11) . . ?
C12 C13 C15 126.0(8) . . ?
C12 C13 S2 120.3(8) . . ?
C12 C13 Br1 126.0(8) . . ?
C15 C13 S2 113.6(6) . . ?
C12 C14 H14A 109.5 . . ?
C12 C14 H14B 109.5 . . ?
C12 C14 H14C 109.5 . . ?
H14A C14 H14B 109.5 . . ?
H14A C14 H14C 109.5 . . ?
H14B C14 H14C 109.5 . . ?
C13 C15 H15A 109.5 . . ?
C13 C15 H15B 109.5 . . ?
C13 C15 H15C 109.5 . . ?
H15A C15 H15B 109.5 . . ?
H15A C15 H15C 109.5 . . ?
H15B C15 H15C 109.5 . . ?
C1 N1 Mo1 169.1(7) . . ?
Mo5 O1 Mo1 113.4(3) . . ?
Mo1 O2 Mo3 113.3(3) . . ?
Mo1 O3 Mo2 113.9(3) . . ?
Mo4 O4 Mo1 113.8(3) . . ?
Mo2 O6 Mo4 116.4(3) . . ?
Mo2 O7 Mo6 115.8(3) . . ?
Mo3 O8 Mo2 117.1(3) . . ?
Mo1 O9 Mo2 91.39(18) . . ?
Mo1 O9 Mo3 90.52(18) . . ?
Mo1 O9 Mo4 90.86(19) . . ?
Mo1 O9 Mo5 90.13(18) . . ?
Mo1 O9 Mo6 179.0(3) . . ?
Mo2 O9 Mo3 90.32(18) . . ?
Mo2 O9 Mo4 90.16(17) . . ?
Mo2 O9 Mo5 178.5(2) . . ?
Mo2 O9 Mo6 89.60(17) . . ?
Mo3 O9 Mo4 178.5(2) . . ?
Mo3 O9 Mo5 89.86(17) . . ?
Mo4 O9 Mo5 89.62(18) . . ?
Mo6 O9 Mo3 89.29(18) . . ?
Mo6 O9 Mo4 89.31(17) . . ?
Mo6 O9 Mo5 88.88(17) . . ?
Mo5 O11 Mo3 117.0(3) . . ?
Mo3 O12 Mo6 117.6(3) . . ?
Mo4 O14 Mo5 116.5(3) . . ?
Mo6 O15 Mo4 117.4(3) . . ?
Mo6 O17 Mo5 117.9(3) . . ?
C12 S1 C9 91.3(6) . . ?
C13 S2 C9 89.2(5) . . ?
N1 Mo1 O1 96.9(3) . . ?
N1 Mo1 O2 103.0(3) . . ?
N1 Mo1 O3 105.6(3) . . ?
N1 Mo1 O4 98.8(3) . . ?
N1 Mo1 O9 174.8(3) . . ?
O1 Mo1 O9 78.6(2) . . ?
O2 Mo1 O1 87.2(2) . . ?
O2 Mo1 O3 91.0(3) . . ?
O2 Mo1 O4 157.7(2) . . ?
O2 Mo1 O9 79.6(2) . . ?
O3 Mo1 O1 157.3(2) . . ?
O3 Mo1 O4 87.6(3) . . ?
O3 Mo1 O9 78.7(2) . . ?
O4 Mo1 O1 85.6(2) . . ?
O4 Mo1 O9 78.3(2) . . ?
O3 Mo2 O8 81.7(3) . . ?
O3 Mo2 O9 75.8(2) . . ?
O5 Mo2 O3 103.3(3) . . ?
O5 Mo2 O6 105.1(3) . . ?
O5 Mo2 O7 102.6(3) . . ?
O5 Mo2 O8 101.0(3) . . ?
O5 Mo2 O9 175.7(3) . . ?
O6 Mo2 O3 90.0(3) . . ?
O6 Mo2 O7 92.8(3) . . ?
O6 Mo2 O8 153.8(3) . . ?
O6 Mo2 O9 79.2(2) . . ?
O7 Mo2 O3 152.2(2) . . ?
O7 Mo2 O8 83.8(3) . . ?
O7 Mo2 O9 77.6(2) . . ?
O8 Mo2 O9 74.7(2) . . ?
O2 Mo3 O9 75.9(2) . . ?
O2 Mo3 O11 82.1(2) . . ?
O8 Mo3 O2 90.9(3) . . ?
O8 Mo3 O9 77.7(2) . . ?
O8 Mo3 O11 152.6(3) . . ?
O8 Mo3 O12 92.0(3) . . ?
O10 Mo3 O2 103.1(3) . . ?
O10 Mo3 O8 106.2(3) . . ?
O10 Mo3 O9 176.1(3) . . ?
O10 Mo3 O11 101.2(3) . . ?
O10 Mo3 O12 103.7(3) . . ?
O11 Mo3 O9 74.9(2) . . ?
O12 Mo3 O2 151.1(3) . . ?
O12 Mo3 O9 76.6(2) . . ?
O12 Mo3 O11 82.2(2) . . ?
O4 Mo4 O6 83.9(3) . . ?
O4 Mo4 O9 76.8(2) . . ?
O4 Mo4 O15 151.3(3) . . ?
O6 Mo4 O9 74.2(2) . . ?
O13 Mo4 O4 104.1(3) . . ?
O13 Mo4 O6 101.7(4) . . ?
O13 Mo4 O9 175.8(3) . . ?
O13 Mo4 O14 105.3(4) . . ?
O13 Mo4 O15 102.9(3) . . ?
O14 Mo4 O4 92.7(3) . . ?
O14 Mo4 O6 152.8(3) . . ?
O14 Mo4 O9 78.7(2) . . ?
O14 Mo4 O15 89.3(3) . . ?
O15 Mo4 O6 81.4(3) . . ?
O15 Mo4 O9 75.5(2) . . ?
O1 Mo5 O9 77.3(2) . . ?
O1 Mo5 O14 84.4(2) . . ?
O1 Mo5 O17 151.6(2) . . ?
O11 Mo5 O1 93.8(3) . . ?
O11 Mo5 O9 78.2(2) . . ?
O11 Mo5 O14 152.9(2) . . ?
O11 Mo5 O17 88.6(3) . . ?
O14 Mo5 O9 75.1(2) . . ?
O16 Mo5 O1 104.5(3) . . ?
O16 Mo5 O9 176.7(3) . . ?
O16 Mo5 O11 104.4(3) . . ?
O16 Mo5 O14 102.2(3) . . ?
O16 Mo5 O17 102.2(3) . . ?
O17 Mo5 O9 75.6(2) . . ?
O17 Mo5 O14 80.8(3) . . ?
O7 Mo6 O9 76.4(2) . . ?
O12 Mo6 O7 84.8(3) . . ?
O12 Mo6 O9 76.4(2) . . ?
O15 Mo6 O7 86.5(3) . . ?
O15 Mo6 O9 77.0(2) . . ?
O15 Mo6 O12 153.2(2) . . ?
O17 Mo6 O7 153.7(2) . . ?
O17 Mo6 O9 77.4(2) . . ?
O17 Mo6 O12 87.6(2) . . ?
O17 Mo6 O15 89.1(3) . . ?
O18 Mo6 O7 103.9(3) . . ?
O18 Mo6 O9 177.3(3) . . ?
O18 Mo6 O12 101.0(3) . . ?
O18 Mo6 O15 105.7(3) . . ?
O18 Mo6 O17 102.3(3) . . ?

loop_
_geom_torsion_atom_site_label_1
_geom_torsion_atom_site_label_2
_geom_torsion_atom_site_label_3
_geom_torsion_atom_site_label_4
_geom_torsion
_geom_torsion_site_symmetry_1
_geom_torsion_site_symmetry_2
_geom_torsion_site_symmetry_3
_geom_torsion_site_symmetry_4
_geom_torsion_publ_flag
C16 C17 C18 C19 174.0(15) . . . . ?
C17 C16 N2 C20 -61.3(14) . . . . ?
C17 C16 N2 C24 179.5(11) . . . . ?
C17 C16 N2 C28 62.1(16) . . . . ?
C17 C16 N2 C29 54.4(14) . . . . ?
C20 C21 C22 C23 178.3(14) . . . . ?
C21 C20 N2 C16 -56.5(13) . . . . ?
C21 C20 N2 C24 62.1(13) . . . . ?
C21 C20 N2 C28 173.4(14) . . . . ?
C21 C20 N2 C29 -167.3(14) . . . . ?
C24 C25 C26 C27 173.6(18) . . . . ?
C25 C24 N2 C16 166.5(13) . . . . ?
C25 C24 N2 C20 45.8(15) . . . . ?
C25 C24 N2 C28 -67.1(17) . . . . ?
C25 C24 N2 C29 -79.4(17) . . . . ?
C28 C30 C32 C34 168(3) . . . . ?
C29 C31 C33 C35 130(3) . . . . ?
C30 C28 N2 C16 50(2) . . . . ?
C30 C28 N2 C20 175.4(18) . . . . ?
C30 C28 N2 C24 -70(2) . . . . ?
C31 C29 N2 C16 55(2) . . . . ?
C31 C29 N2 C20 172(2) . . . . ?
C31 C29 N2 C24 -63(3) . . . . ?
N2 C16 C17 C18 179.4(13) . . . . ?
N2 C20 C21 C22 -166.4(12) . . . . ?
N2 C24 C25 C26 158.3(15) . . . . ?
N2 C28 C30 C32 174(2) . . . . ?
N2 C29 C31 C33 158(2) . . . . ?
C1 C2 C6 C8 1.4(14) . . . . ?
C1 C3 C7 C8 -0.6(13) . . . . ?
C1 N1 Mo1 O1 -30(4) . . . . ?
C1 N1 Mo1 O2 -119(4) . . . . ?
C1 N1 Mo1 O3 147(4) . . . . ?
C1 N1 Mo1 O4 57(4) . . . . ?
C2 C1 C3 C5 -179.9(8) . . . . ?
C2 C1 C3 C7 -1.1(13) . . . . ?
C2 C1 N1 Mo1 -95(4) . . . . ?
C2 C6 C8 C7 -3.0(14) . . . . ?
C2 C6 C8 C9 178.5(9) . . . . ?
C3 C1 C2 C4 -176.1(9) . . . . ?
C3 C1 C2 C6 0.7(13) . . . . ?
C3 C1 N1 Mo1 83(4) . . . . ?
C3 C7 C8 C6 2.5(14) . . . . ?
C3 C7 C8 C9 -179.0(9) . . . . ?
C4 C2 C6 C8 178.3(10) . . . . ?
C5 C3 C7 C8 178.2(8) . . . . ?
C6 C8 C9 C10 -7(2) . . . . ?
C6 C8 C9 C11 166(2) . . . . ?
C6 C8 C9 S1 -9.9(13) . . . . ?
C6 C8 C9 S2 171.2(8) . . . . ?
C7 C8 C9 C10 175.1(15) . . . . ?
C7 C8 C9 C11 -12(3) . . . . ?
C7 C8 C9 S1 171.6(8) . . . . ?
C7 C8 C9 S2 -7.2(14) . . . . ?
C8 C9 C10 C12 -174.7(14) . . . . ?
C8 C9 C11 C13 174.6(14) . . . . ?
C8 C9 S1 C12 -177.9(9) . . . . ?
C8 C9 S2 C13 177.9(9) . . . . ?
C9 C10 C12 C13 -7(2) . . . . ?
C9 C10 C12 C14 176.6(13) . . . . ?
C9 C11 C13 C12 8(3) . . . . ?
C9 C11 C13 Br1 -171.4(14) . . . . ?
C10 C9 S2 C13 -3.7(11) . . . . ?
C10 C12 C13 C15 178.8(12) . . . . ?
C10 C12 C13 S2 2.8(15) . . . . ?
C11 C9 S1 C12 4.9(15) . . . . ?
C12 C13 S2 C9 0.4(11) . . . . ?
C13 C12 S1 C9 -0.6(11) . . . . ?
C14 C12 C13 C15 -5(2) . . . . ?
C14 C12 C13 S2 179.2(9) . . . . ?
C15 C13 S2 C9 -176.1(7) . . . . ?
N1 C1 C2 C4 1.6(13) . . . . ?
N1 C1 C2 C6 178.4(8) . . . . ?
N1 C1 C3 C5 2.5(12) . . . . ?
N1 C1 C3 C7 -178.7(8) . . . . ?
S1 C9 C11 C13 -9(3) . . . . ?
S1 C12 C13 C11 -3.6(17) . . . . ?
S1 C12 C13 Br1 176.1(8) . . . . ?
S2 C9 C10 C12 7(2) . . . . ?
Mo1 O1 Mo5 O9 -6.4(3) . . . . ?
Mo1 O1 Mo5 O11 70.6(3) . . . . ?
Mo1 O1 Mo5 O14 -82.3(3) . . . . ?
Mo1 O1 Mo5 O16 176.5(3) . . . . ?
Mo1 O1 Mo5 O17 -23.5(7) . . . . ?
Mo1 O4 Mo4 O6 -79.1(3) . . . . ?
Mo1 O4 Mo4 O9 -4.0(3) . . . . ?
Mo1 O4 Mo4 O13 -179.7(4) . . . . ?
Mo1 O4 Mo4 O14 73.8(3) . . . . ?
Mo1 O4 Mo4 O15 -19.9(7) . . . . ?
Mo2 O8 Mo3 O2 -79.0(4) . . . . ?
Mo2 O8 Mo3 O9 -3.7(3) . . . . ?
Mo2 O8 Mo3 O10 177.1(4) . . . . ?
Mo2 O8 Mo3 O11 -4.6(8) . . . . ?
Mo2 O8 Mo3 O12 72.2(4) . . . . ?
Mo3 O11 Mo5 O1 -74.9(3) . . . . ?
Mo3 O11 Mo5 O9 1.2(3) . . . . ?
Mo3 O11 Mo5 O14 10.4(7) . . . . ?
Mo3 O11 Mo5 O16 179.1(3) . . . . ?
Mo3 O11 Mo5 O17 76.8(3) . . . . ?
Mo4 O6 Mo2 O3 -76.7(4) . . . . ?
Mo4 O6 Mo2 O5 179.5(4) . . . . ?
Mo4 O6 Mo2 O7 75.6(4) . . . . ?
Mo4 O6 Mo2 O8 -6.0(9) . . . . ?
Mo4 O6 Mo2 O9 -1.2(3) . . . . ?
Mo4 O15 Mo6 O7 -84.5(3) . . . . ?
Mo4 O15 Mo6 O9 -7.7(3) . . . . ?
Mo4 O15 Mo6 O12 -13.3(8) . . . . ?
Mo4 O15 Mo6 O17 69.6(3) . . . . ?
Mo4 O15 Mo6 O18 172.1(3) . . . . ?
Mo5 O14 Mo4 O4 -73.2(3) . . . . ?
Mo5 O14 Mo4 O6 8.7(8) . . . . ?
Mo5 O14 Mo4 O9 2.8(3) . . . . ?
Mo5 O14 Mo4 O13 -178.6(4) . . . . ?
Mo5 O14 Mo4 O15 78.2(3) . . . . ?
Mo5 O17 Mo6 O7 -1.4(8) . . . . ?
Mo5 O17 Mo6 O9 -4.6(3) . . . . ?
Mo5 O17 Mo6 O12 72.0(3) . . . . ?
Mo5 O17 Mo6 O15 -81.4(3) . . . . ?
Mo5 O17 Mo6 O18 172.7(4) . . . . ?

_shelx_res_file                  
;
    mh1_178_2.res created by SHELXL-2014/7

TITL mh1_178_2_a.res in P2(1)/n
REM Old TITL MH1_178_2 in P21/n #14
REM SHELXT solution in P2(1)/n
REM R1 0.168, Rweak 0.006, Alpha 0.025, Orientation as input
REM Formula found by SHELXT: N5 O8 Mo6 C36 S15
CELL 1.54184 11.030227 16.923229 32.450739 90 98.8238 90
ZERR 4 0.000162 0.000235 0.00046 0 0.0013 0
LATT 1
SYMM 0.5-X,0.5+Y,0.5-Z
SFAC N O Mo C Br S H
UNIT 12 72 24 180 4 4 336
DFIX 1.5 C32 C34
DFIX 1.5 C33 C35
DFIX 1.5 C32 C30
DFIX 1.5 C30 C33
DFIX 1.5 C13 C15
DFIX 1.5 C12 C14
DFIX 1.35 C9 C11
DFIX 1.35 C12 C13
DFIX 1.41 C10 C12
DFIX 1.41 C11 C13
DFIX 1.7 C9 S1
DFIX 1.7 S1 C12
DFIX 1.7 C9 S2
DFIX 1.7 S2 C13
DFIX 1.5 C29 C31
DFIX 1.5 C30 C29
DFIX 1.5 C26 C25
DFIX 1.53 C26 C25
DANG 2.5 C30 C34
DANG 2.5 C35 C30
DANG 2.55 C10 S2
DANG 2.55 S1 C13
DANG 2.55 S1 C11
DANG 2.55 C12 S2
EADP C15 Br1
EADP C14 Br2
EADP S2 S1
EADP C33 C35 C32 C34
EADP C11 C10
EXYZ C15 Br1
EXYZ C14 Br2

L.S. 10
PLAN  10
BOND $H
LIST 6
MORE -1
CONF
fmap 2
acta
REM <olex2.extras>
REM <HklSrc "%.\\MH1_178_2-mask.hkl">
REM </olex2.extras>

WGHT    0.143500   14.697101
FVAR       1.18830   0.56601   0.58024
C16   4    1.039560   -1.336037    0.791981    11.00000    0.08412    0.08362 =
         0.06856   -0.01807    0.00037    0.00967
AFIX  23
H16A  7    1.083023   -1.340417    0.820231    11.00000   -1.20000
H16B  7    0.989840   -1.288543    0.790447    11.00000   -1.20000
AFIX   0
C17   4    1.133224   -1.328075    0.761867    11.00000    0.09570    0.11398 =
         0.09253   -0.03563    0.01011   -0.01186
AFIX  23
H17A  7    1.183550   -1.375319    0.763636    11.00000   -1.20000
H17B  7    1.089774   -1.324314    0.733589    11.00000   -1.20000
AFIX   0
C18   4    1.213659   -1.258392    0.770658    11.00000    0.09986    0.14797 =
         0.09275   -0.02286    0.00000   -0.03068
AFIX  23
H18A  7    1.251861   -1.258934    0.799645    11.00000   -1.20000
H18B  7    1.165455   -1.210431    0.765744    11.00000   -1.20000
AFIX   0
C19   4    1.313467   -1.259915    0.742081    11.00000    0.12864    0.18231 =
         0.09302   -0.01063    0.01747   -0.03118
AFIX 137
H19A  7    1.277811   -1.276826    0.714649    11.00000   -1.50000
H19B  7    1.377349   -1.295957    0.753253    11.00000   -1.50000
H19C  7    1.347274   -1.207908    0.740580    11.00000   -1.50000
AFIX   0
C20   4    0.881826   -1.399572    0.738713    11.00000    0.09708    0.07640 =
         0.05968   -0.01393    0.00720    0.00817
AFIX  23
H20A  7    0.937378   -1.402070    0.718294    11.00000   -1.20000
H20B  7    0.827898   -1.445063    0.734298    11.00000   -1.20000
AFIX   0
C21   4    0.805737   -1.326043    0.731060    11.00000    0.08242    0.06777 =
         0.07018   -0.01602    0.01072    0.00303
AFIX  23
H21A  7    0.763228   -1.316332    0.754612    11.00000   -1.20000
H21B  7    0.858582   -1.281175    0.728254    11.00000   -1.20000
AFIX   0
C22   4    0.714054   -1.334860    0.692108    11.00000    0.09278    0.06943 =
         0.11157   -0.02729   -0.01750    0.00256
AFIX  23
H22A  7    0.757474   -1.343495    0.668671    11.00000   -1.20000
H22B  7    0.663854   -1.381095    0.694766    11.00000   -1.20000
AFIX   0
C23   4    0.632260   -1.264184    0.683285    11.00000    0.11413    0.10937 =
         0.11483   -0.04425   -0.02245    0.02482
AFIX 137
H23A  7    0.567164   -1.276221    0.660978    11.00000   -1.50000
H23B  7    0.679123   -1.220440    0.675385    11.00000   -1.50000
H23C  7    0.598114   -1.250632    0.707842    11.00000   -1.50000
AFIX   0
C24   4    0.869010   -1.407117    0.815515    11.00000    0.11518    0.07617 =
         0.06028   -0.01285    0.00862   -0.00729
AFIX  23
H24A  7    0.913997   -1.422851    0.842311    11.00000   -1.20000
H24B  7    0.837250   -1.354316    0.818494    11.00000   -1.20000
AFIX   0
C25   4    0.760749   -1.464382    0.803308    11.00000    0.16721    0.09055 =
         0.13145   -0.02474    0.05511   -0.04125
AFIX  23
H25A  7    0.698870   -1.438949    0.783182    11.00000   -1.20000
H25B  7    0.789389   -1.510924    0.790247    11.00000   -1.20000
AFIX   0
C26   4    0.704884   -1.488720    0.840513    11.00000    0.15194    0.08608 =
         0.14290   -0.03612    0.03457   -0.03005
AFIX  23
H26A  7    0.685503   -1.441729    0.855332    11.00000   -1.20000
H26B  7    0.764670   -1.519005    0.859147    11.00000   -1.20000
AFIX   0
C27   4    0.587539   -1.538513    0.829346    11.00000    0.21133    0.11225 =
         0.16361   -0.03884    0.05409   -0.07259
AFIX 137
H27A  7    0.603896   -1.582384    0.812267    11.00000   -1.50000
H27B  7    0.523776   -1.506398    0.814360    11.00000   -1.50000
H27C  7    0.561814   -1.557790    0.854452    11.00000   -1.50000
AFIX   0
PART 2
C28   4    1.014283   -1.485688    0.785817    21.00000    0.07453
AFIX  23
H28A  7    1.057453   -1.492526    0.762173    21.00000   -1.20000
H28B  7    0.948416   -1.524215    0.782969    21.00000   -1.20000
AFIX   0
PART 0
PART 1
C29   4    1.055157   -1.474678    0.783273   -21.00000    0.06137
AFIX  23
H29A  7    1.010275   -1.524039    0.779034   -21.00000   -1.20000
H29B  7    1.097445   -1.467343    0.759457   -21.00000   -1.20000
AFIX   0
PART 0
PART 2
C30   4    1.105642   -1.506027    0.826400    21.00000    0.08836
AFIX  23
H30A  7    1.177763   -1.472680    0.828095    21.00000   -1.20000
H30B  7    1.066686   -1.495742    0.850704    21.00000   -1.20000
AFIX   0
PART 0
PART 1
C31   4    1.150800   -1.483915    0.821349   -21.00000    0.07713
AFIX  23
H31A  7    1.115777   -1.472878    0.846392   -21.00000   -1.20000
H31B  7    1.218450   -1.447785    0.820169   -21.00000   -1.20000
AFIX   0
PART 0
PART 2
C32   4    1.143163   -1.591529    0.826029    21.00000    0.14076
AFIX  23
H32A  7    1.073682   -1.624357    0.829874    21.00000   -1.20000
H32B  7    1.165446   -1.604085    0.799002    21.00000   -1.20000
AFIX   0
PART 0
PART 1
C33   4    1.195819   -1.570538    0.821489   -21.00000    0.14076
AFIX  23
H33A  7    1.173671   -1.601302    0.844433   -21.00000   -1.20000
H33B  7    1.170258   -1.597443    0.795198   -21.00000   -1.20000
AFIX   0
PART 0
PART 2
C34   4    1.248365   -1.610728    0.859091    21.00000    0.14076
AFIX 137
H34A  7    1.297255   -1.564230    0.865826    21.00000   -1.50000
H34B  7    1.297695   -1.651186    0.849195    21.00000   -1.50000
H34C  7    1.217910   -1.629133    0.883549    21.00000   -1.50000
AFIX   0
PART 0
PART 1
C35   4    1.327403   -1.547111    0.827818   -21.00000    0.14076
AFIX 137
H35A  7    1.346895   -1.523734    0.802687   -21.00000   -1.50000
H35B  7    1.377697   -1.592965    0.834678   -21.00000   -1.50000
H35C  7    1.342504   -1.509520    0.850173   -21.00000   -1.50000
AFIX   0
PART 0
N2    1    0.957988   -1.405449    0.782844    11.00000    0.10166    0.06377 =
         0.06261   -0.01466    0.00386    0.00592

C1    4    0.447873   -1.819774    0.578524    11.00000    0.05812    0.06117 =
         0.04818    0.00138    0.00183   -0.01038
C2    4    0.471595   -1.893867    0.561422    11.00000    0.06084    0.07606 =
         0.05508   -0.01518    0.01252   -0.00990
C3    4    0.333667   -1.800900    0.589403    11.00000    0.05828    0.04921 =
         0.05696   -0.00484    0.00238   -0.00394
C4    4    0.595808   -1.915156    0.552412    11.00000    0.06294    0.08853 =
         0.08581   -0.02693    0.02547   -0.00836
AFIX 137
H4A   7    0.621754   -1.876902    0.533734    11.00000   -1.50000
H4B   7    0.593025   -1.966520    0.539746    11.00000   -1.50000
H4C   7    0.652762   -1.915778    0.577945    11.00000   -1.50000
AFIX   0
C5    4    0.314268   -1.720705    0.607477    11.00000    0.06475    0.05086 =
         0.07119   -0.00451   -0.00059    0.00293
AFIX 137
H5A   7    0.372806   -1.712844    0.632249    11.00000   -1.50000
H5B   7    0.232719   -1.717569    0.614281    11.00000   -1.50000
H5C   7    0.324918   -1.680603    0.587416    11.00000   -1.50000
AFIX   0
C6    4    0.374563   -1.947163    0.555477    11.00000    0.06257    0.05754 =
         0.05831   -0.01521    0.01096   -0.00350
AFIX  43
H6    7    0.388563   -1.996802    0.544846    11.00000   -1.20000
AFIX   0
C7    4    0.240699   -1.856532    0.582437    11.00000    0.05526    0.06150 =
         0.05856   -0.00922    0.00368    0.00348
AFIX  43
H7    7    0.164588   -1.844610    0.589832    11.00000   -1.20000
AFIX   0
C8    4    0.258130   -1.930831    0.564432    11.00000    0.05910    0.06086 =
         0.06310   -0.01200    0.00373   -0.00721
C9    4    0.160410   -1.989155    0.556378    11.00000    0.06024    0.06177 =
         0.07053   -0.00628    0.01255   -0.00388
PART 1
C10   4    0.150840   -2.059957    0.537734    31.00000    0.07611
AFIX  43
H10   7    0.221265   -2.080411    0.529240    31.00000   -1.20000
AFIX   0
PART 0
PART 2
C11   4    0.047208   -1.998825    0.567336   -31.00000    0.07611
AFIX  43
H11   7    0.021051   -1.963569    0.586123   -31.00000   -1.20000
AFIX   0
PART 0
C12   4    0.041853   -2.106977    0.529709    11.00000    0.06436    0.10162 =
         0.10554    0.01818    0.01104    0.00668
C13   4   -0.033788   -2.062141    0.550723    11.00000    0.07298    0.06517 =
         0.09104   -0.00230   -0.00356    0.00242
PART 1
C14   4    0.021547   -2.193695    0.504435   -31.00000    0.08172
AFIX 137
H14A  7    0.089023   -2.228197    0.514098   -31.00000   -1.50000
H14B  7    0.017559   -2.184964    0.475027   -31.00000   -1.50000
H14C  7   -0.053550   -2.217496    0.509731   -31.00000   -1.50000
AFIX   0
C15   4   -0.181073   -2.081471    0.553947    31.00000    0.10148
AFIX 137
H15A  7   -0.232884   -2.055486    0.531531    31.00000   -1.50000
H15B  7   -0.199890   -2.062541    0.580128    31.00000   -1.50000
H15C  7   -0.194801   -2.137457    0.552030    31.00000   -1.50000
AFIX   0
PART 0
N1    1    0.542995   -1.768254    0.585395    11.00000    0.05777    0.06535 =
         0.05857   -0.00734   -0.00137   -0.01341
O1    2    0.642785   -1.703310    0.663293    11.00000    0.04985    0.04917 =
         0.06591   -0.00045    0.01286   -0.00517
O2    2    0.605426   -1.603043    0.597656    11.00000    0.04502    0.06600 =
         0.06350    0.00068   -0.00089   -0.00737
O3    2    0.757300   -1.693747    0.557319    11.00000    0.05517    0.07623 =
         0.05436   -0.01420    0.00683   -0.01367
O4    2    0.791105   -1.793436    0.623472    11.00000    0.05523    0.05291 =
         0.06283   -0.00811    0.00646   -0.00076
O5    2    0.964808   -1.634187    0.525086    11.00000    0.06619    0.09242 =
         0.06082   -0.00995    0.02041   -0.00588
O6    2    0.981175   -1.729610    0.595708    11.00000    0.05919    0.07757 =
         0.06564   -0.02029    0.01705    0.00309
O7    2    1.024794   -1.572827    0.606149    11.00000    0.05080    0.07917 =
         0.06423   -0.01014    0.01936   -0.01004
O8    2    0.801076   -1.543732    0.567584    11.00000    0.07500    0.06578 =
         0.04892    0.00731    0.00406   -0.00697
O9    2    0.831654   -1.639528    0.632922    11.00000    0.04291    0.05226 =
         0.05166   -0.00578    0.00526   -0.00111
O10   2    0.648067   -1.437360    0.602201    11.00000    0.06858    0.05889 =
         0.06862    0.00720    0.00952    0.00549
O11   2    0.688582   -1.546126    0.671604    11.00000    0.05041    0.05140 =
         0.06112   -0.00445    0.01670   -0.00455
O12   2    0.879311   -1.486520    0.644649    11.00000    0.05544    0.05085 =
         0.06089   -0.00215    0.01345   -0.01044
O13   2    1.023441   -1.839080    0.666072    11.00000    0.07422    0.06509 =
         0.09646   -0.00812    0.00052    0.01834
O14   2    0.867032   -1.733865    0.700485    11.00000    0.05682    0.05477 =
         0.05779    0.00226    0.01024    0.00466
O15   2    1.058273   -1.671248    0.669887    11.00000    0.04267    0.07714 =
         0.06105   -0.01173    0.00213    0.00356
O16   2    0.706205   -1.638484    0.743463    11.00000    0.06552    0.05625 =
         0.06508    0.00289    0.01923   -0.00217
O17   2    0.912209   -1.584009    0.708935    11.00000    0.04649    0.06302 =
         0.05335   -0.00880    0.00764    0.00016
O18   2    1.118049   -1.508734    0.687056    11.00000    0.05201    0.08907 =
         0.06347   -0.01870    0.00736   -0.01524
PART 2
S1    6    0.185144   -2.074532    0.527527   -31.00000    0.06728
PART 0
PART 1
S2    6    0.018184   -1.974374    0.574185    31.00000    0.06728
PART 0
PART 2
BR1   5   -0.181073   -2.081471    0.553947   -31.00000    0.10148
PART 0
PART 1
BR2   5    0.021547   -2.193695    0.504435    31.00000    0.08172
PART 0
MO1   3    0.671213   -1.708542    0.604108    11.00000    0.05026    0.05658 =
         0.05788   -0.00582    0.00442   -0.00919
MO2   3    0.912938   -1.639717    0.571158    11.00000    0.05651    0.07245 =
         0.05160   -0.01072    0.01326   -0.00616
MO3   3    0.727705   -1.521531    0.613399    11.00000    0.05122    0.05309 =
         0.05660    0.00255    0.00686   -0.00041
MO4   3    0.939279   -1.756025    0.653803    11.00000    0.05595    0.05826 =
         0.06705   -0.00787    0.00797    0.00888
MO5   3    0.753898   -1.637765    0.696627    11.00000    0.04992    0.04800 =
         0.05531   -0.00117    0.01321   -0.00286
MO6   3    1.000012   -1.565993    0.664486    11.00000    0.04145    0.06400 =
         0.05385   -0.01039    0.00815   -0.00850
HKLF 4

REM  mh1_178_2_a.res in P2(1)/n
REM R1 =  0.0790 for   10120 Fo > 4sig(Fo)  and  0.0898 for all   12538 data
REM    504 parameters refined using     24 restraints

END

WGHT      0.1435     14.6915

REM Highest difference peak  3.864,  deepest hole -3.320,  1-sigma level  0.176
Q1    1   0.6808 -1.6799  0.5772  11.00000  0.05    3.86
Q2    1   0.9466 -1.6016  0.5584  11.00000  0.05    3.36
Q3    1   0.9412 -1.7396  0.6295  11.00000  0.05    3.24
Q4    1   0.0352 -2.1826  0.4865  11.00000  0.05    3.21
Q5    1   0.7457 -1.6426  0.6733  11.00000  0.05    2.56
Q6    1   0.0044 -2.2020  0.5200  11.00000  0.05    2.28
Q7    1   0.7623 -1.4940  0.6028  11.00000  0.05    2.12
Q8    1  -0.0514 -1.9262  0.5820  11.00000  0.05    1.16
Q9    1   0.8706 -1.6700  0.5585  11.00000  0.05    1.02
Q10   1   0.7818 -1.6601  0.5326  11.00000  0.05    0.82
;
_shelx_res_checksum              92707
_shelx_hkl_file                  
;
 -13   0  -7  246.98   39.63
 -13   0  -5 2368.21   85.88
 -13   0  -3  125.47   33.53
 -13   0  -1  787.92   60.46
 -13   0   1  139.09   32.45
 -13   0   3 1684.69   74.10
 -13   0   5    1.72   48.77
 -13   0   7   44.47   46.15
 -13   0   9  104.45   40.82
 -13   0  11  298.89   43.18
 -13   0  13 3907.98  119.13
 -13   0  15  575.54   68.70
 -13   0  17  778.09   55.12
 -13   0  19  103.48   33.05
 -13   1  -8 1723.57   65.09
 -13   1  -7 2026.21   78.52
 -13   1  -6 1756.21   53.34
 -13   1  -5   32.53   17.35
 -13   1  -4    8.03   14.74
 -13   1  -3   28.19   13.65
 -13   1  -2   74.65   23.03
 -13   1  -1   24.81   22.59
 -13   1   0  184.90   26.19
 -13   1   1 2510.05  125.43
 -13   1   2 1085.09   68.28
 -13   1   3  166.93   34.25
 -13   1   4  195.28   31.12
 -13   1   5    1.36   29.36
 -13   1   6  171.41   41.02
 -13   1   7  477.97   53.97
 -13   1   8  907.28   61.94
 -13   1   9  543.36   53.60
 -13   1  10   61.47   23.74
 -13   1  11  184.91   51.40
 -13   1  12 1224.53   49.05
 -13   1  13 1189.03   57.75
 -13   1  14  457.63   28.00
 -13   1  15  820.66   39.24
 -13   1  16 1900.09   95.07
 -13   1  17  180.28   25.01
 -13   1  18    4.73   18.83
 -13   1  19    1.47   21.30
 -13   1  20    0.46   18.85
 -13   2  -8 1222.72   63.76
 -13   2  -7 1408.10   43.88
 -13   2  -6  473.10   35.44
 -13   2  -5  101.89   17.79
 -13   2  -4    2.33   24.61
 -13   2  -3  689.33   35.88
 -13   2  -2  577.37   37.57
 -13   2  -1  192.82   38.68
 -13   2   0 2976.96  194.61
 -13   2   1  155.39   39.12
 -13   2   2  325.99   58.98
 -13   2   3  555.32   98.94
 -13   2   4 1582.29  159.92
 -13   2   5 3327.96  180.99
 -13   2   6  266.12  211.25
 -13   2   7  942.59   88.76
 -13   2   8 1446.65   88.37
 -13   2   9 4745.48  143.08
 -13   2  10  406.69  201.14
 -13   2  11 1809.97   95.15
 -13   2  12  324.65   62.22
 -13   2  13 1427.51   57.80
 -13   2  14  591.74   71.74
 -13   2  15 1720.58   93.91
 -13   2  16  352.64   34.18
 -13   2  17   28.24   17.53
 -13   2  18  197.95   20.39
 -13   2  19  171.83   24.37
 -13   3  -7  393.33   29.08
 -13   3  -6  468.30   34.70
 -13   3  -5 1051.58   53.08
 -13   3  -4   52.12   27.86
 -13   3  -3  707.38   39.41
 -13   3  -2 3507.05  188.81
 -13   3  -1  500.57   43.74
 -13   3   0  495.46   48.42
 -13   3   1  773.85   71.14
 -13   3   2 1624.69   94.71
 -13   3   3 1023.31  131.89
 -13   3   4  364.07   77.38
 -13   3   5  912.57   78.12
 -13   3   6  821.49   91.27
 -13   3   7 2704.02  119.66
 -13   3   8 1148.67  106.40
 -13   3   9  948.27   95.56
 -13   3  10  672.19   49.50
 -13   3  11 1831.53  180.51
 -13   3  12 1923.18  224.75
 -13   3  13  755.33   97.68
 -13   3  14  346.59   37.96
 -13   3  15  787.03   42.79
 -13   3  16  404.66   34.47
 -13   3  17 1749.12   86.78
 -13   3  18    2.57   22.09
 -13   3  19   24.18   35.15
 -13   4  -6  248.43   25.38
 -13   4  -5  465.61   31.59
 -13   4  -4 4155.21  132.26
 -13   4  -3   80.07   23.91
 -13   4  -2  147.29   27.65
 -13   4  -1 3950.04  210.79
 -13   4   0  920.56  128.05
 -13   4   1  415.22   50.48
 -13   4   2  193.30   43.28
 -13   4   3  763.62   47.49
 -13   4   4  120.88   32.66
 -13   4   5   18.84   27.71
 -13   4   6   86.44   35.67
 -13   4   7 2264.14  102.71
 -13   4   8  974.74   76.82
 -13   4   9  712.96   63.02
 -13   4  10 2230.73  188.31
 -13   4  11  471.20   53.39
 -13   4  12    2.54   28.63
 -13   4  13  366.33   42.54
 -13   4  14 4184.56  264.06
 -13   4  15    4.27   44.07
 -13   4  16  112.68   23.96
 -13   4  17  207.91   37.15
 -13   4  18  362.87   46.14
 -13   5  -5  123.41   19.07
 -13   5  -4 1519.11   59.23
 -13   5  -3 1347.26   54.42
 -13   5  -2  523.10   42.05
 -13   5  -1 1433.33   82.67
 -13   5   0 1875.51  104.88
 -13   5   1  593.26   44.25
 -13   5   2  151.05   35.13
 -13   5   3  343.03   46.12
 -13   5   4   29.44   20.43
 -13   5   5 1788.26  117.61
 -13   5   6   33.32   38.56
 -13   5   7 2451.53  165.91
 -13   5   8    1.35   48.26
 -13   5   9 2092.21  104.89
 -13   5  10    4.23   46.29
 -13   5  11 1197.91   83.85
 -13   5  12    6.98   28.42
 -13   5  13  181.64   38.79
 -13   5  14   22.80   26.27
 -13   5  15  505.96   57.96
 -13   5  16  831.76   70.53
 -13   5  17  331.39   49.41
 -13   6  -3  987.20   57.54
 -13   6  -2  286.00   24.03
 -13   6  -1  107.09   17.10
 -13   6   0   64.51   31.56
 -13   6   1 1009.18   49.60
 -13   6   2   91.13   72.87
 -13   6   3 1750.97  131.40
 -13   6   4 2126.40  109.83
 -13   6   5  391.85   67.88
 -13   6   6   76.61   40.39
 -13   6   7 2824.75  248.38
 -13   6   8 3235.77  157.65
 -13   6   9  105.22   43.25
 -13   6  10  373.88   40.71
 -13   6  11   23.62   22.70
 -13   6  12   77.79   29.42
 -13   6  13    0.97   28.36
 -13   6  14    1.13   20.61
 -13   7   0  308.77   78.02
 -13   7   1    3.50   26.23
 -13   7   2    0.23   23.74
 -13   7   3  608.45   42.65
 -13   7   4  630.54   59.38
 -13   7   5  561.66  160.64
 -13   7   6 5200.56  239.45
 -13   7   7 1715.61  112.31
 -13   7   8  106.48   41.05
 -13   7   9  282.85   42.76
 -13   7  10 1141.20   79.92
 -13   7  11  715.66   60.57
 -13   7  12    6.16   44.70
 -12   0 -10 1361.31   77.61
 -12   0  -8 4588.83  196.00
 -12   0  -6  171.47   30.17
 -12   0  -4  198.58   37.05
 -12   0  -2  140.04   36.26
 -12   0   011275.19  336.89
 -12   0   2   68.78   46.85
 -12   0   4 7008.89  297.46
 -12   0   6   36.84  100.83
 -12   0   8 1188.30   98.64
 -12   0  10  115.36   50.40
 -12   0  12  273.22   46.41
 -12   0  14  801.74   92.31
 -12   0  16  994.46   82.97
 -12   0  18  272.83   35.21
 -12   0  20   10.25   21.98
 -12   0  22  404.58   49.93
 -12   0  24   57.88   26.10
 -12   1 -11  955.21   44.97
 -12   1 -10 1431.37   62.05
 -12   1  -9  228.09   31.13
 -12   1  -8 1005.97   57.68
 -12   1  -7 1122.78   56.49
 -12   1  -6   40.97   26.66
 -12   1  -5   92.68   27.46
 -12   1  -4  363.60   44.89
 -12   1  -3  443.36   40.04
 -12   1  -2 1631.51   80.60
 -12   1  -1 2681.36  125.64
 -12   1   0 1205.92   83.53
 -12   1   1  698.17  189.81
 -12   1   2 8914.23  399.78
 -12   1   3 6245.65  194.47
 -12   1   4 1080.41  246.24
 -12   1   5 1414.92  123.51
 -12   1   6    1.77   69.62
 -12   1   7  434.24   48.35
 -12   1   8  758.18   86.51
 -12   1   9 1591.97   85.33
 -12   1  10   57.43   43.25
 -12   1  11  146.83   34.72
 -12   1  12  769.74   60.90
 -12   1  13   49.81   32.10
 -12   1  14   31.25   38.64
 -12   1  15    8.27   30.49
 -12   1  16  686.42   48.67
 -12   1  17    0.98   24.95
 -12   1  18    1.47   24.79
 -12   1  19  149.51   22.27
 -12   1  20  247.96   37.48
 -12   1  21  989.48   57.96
 -12   1  22  619.87   38.09
 -12   1  23  126.43   26.11
 -12   1  24  167.65   41.56
 -12   1  25 1942.93   72.12
 -12   2 -11    6.22   17.31
 -12   2 -10  151.44   20.43
 -12   2  -9  464.40   36.19
 -12   2  -8   82.26   27.35
 -12   2  -7  592.29   35.26
 -12   2  -6  121.30   24.26
 -12   2  -5    1.88   28.69
 -12   2  -4  161.91   26.48
 -12   2  -3  559.58   51.70
 -12   2  -2 1121.90   77.01
 -12   2  -1 5318.42  180.16
 -12   2   0  190.50  176.75
 -12   2   1 7362.75  205.73
 -12   2   2 6465.15  206.40
 -12   2   3  344.64   71.51
 -12   2   4  268.10   47.60
 -12   2   5 1153.58   98.20
 -12   2   6 8143.82  279.62
 -12   2   7  712.85  342.60
 -12   2   8  513.93  336.09
 -12   2   9 7505.61  542.60
 -12   2  10 4810.25  186.22
 -12   2  11  761.67  142.51
 -12   2  12  652.05   54.39
 -12   2  13    7.56   34.88
 -12   2  14  375.17   40.75
 -12   2  15    1.40   44.73
 -12   2  16    0.39   25.87
 -12   2  17  670.03   40.50
 -12   2  18  906.29   42.31
 -12   2  19   38.45   24.26
 -12   2  20 2538.47   93.29
 -12   2  21   31.40   22.89
 -12   2  22  899.18   39.98
 -12   2  23  554.63   38.08
 -12   2  24 4140.43  169.43
 -12   2  25  140.35   24.88
 -12   3 -11  195.86   23.40
 -12   3 -10  339.00   27.68
 -12   3  -9  613.81   37.86
 -12   3  -8  250.99   24.40
 -12   3  -7   13.28   19.58
 -12   3  -6  202.99   22.69
 -12   3  -5  217.64   31.26
 -12   3  -4  281.03   28.48
 -12   3  -3 1710.10   75.50
 -12   3  -2 1547.90  101.68
 -12   3  -1  950.09   67.58
 -12   3   0  569.14   91.74
 -12   3   1 3838.42  139.37
 -12   3   2  569.39  214.30
 -12   3   3   16.27   46.90
 -12   3   4 7152.86  199.73
 -12   3   5 1658.62  241.92
 -12   3   6 2641.53  235.55
 -12   3   7 7779.77  287.69
 -12   3   8 3918.05  475.29
 -12   3   9  518.45  306.36
 -12   3  10 3777.47  192.17
 -12   3  11 4310.52  253.99
 -12   3  12  574.02   92.69
 -12   3  13  935.19   57.65
 -12   3  14  442.35   48.00
 -12   3  15  592.18   45.64
 -12   3  16    0.65   19.61
 -12   3  17   31.07   19.66
 -12   3  18   43.07   24.27
 -12   3  19   72.63   21.10
 -12   3  20  248.66   22.32
 -12   3  21  516.60   36.99
 -12   3  22 2980.96  100.91
 -12   3  23 2110.30   69.85
 -12   3  24 1402.45   75.36
 -12   3  25  177.30   29.12
 -12   4 -11 1336.22   56.47
 -12   4 -10  225.52   24.22
 -12   4  -9    2.56   18.19
 -12   4  -8  215.48   32.99
 -12   4  -7 2795.50   90.85
 -12   4  -6  262.02   32.82
 -12   4  -5  569.61   44.91
 -12   4  -4   40.55   40.68
 -12   4  -3 2053.02  128.71
 -12   4  -2   30.23   35.73
 -12   4  -1  368.14   49.12
 -12   4   0 2994.13  116.60
 -12   4   1  362.37   75.77
 -12   4   2  371.88   51.69
 -12   4   3  577.91   74.49
 -12   4   4    9.11  111.81
 -12   4   5 2566.75  127.99
 -12   4   6    5.94   61.20
 -12   4   7 1592.08  108.22
 -12   4   8 8879.34  209.10
 -12   4   9 3888.63  232.69
 -12   4  10 1427.29  115.18
 -12   4  11 2791.95  193.35
 -12   4  12 1781.28   95.84
 -12   4  13    5.98   39.24
 -12   4  14  110.97   35.25
 -12   4  15 1512.11   86.74
 -12   4  16   88.49   23.36
 -12   4  17   86.07   21.15
 -12   4  18  491.68   35.65
 -12   4  19  605.50   35.61
 -12   4  20    2.07   16.39
 -12   4  21   19.94   15.79
 -12   4  22  580.09   36.95
 -12   4  23  930.44   57.38
 -12   4  24   26.84   19.30
 -12   5 -11   69.13   21.16
 -12   5 -10  568.53   28.92
 -12   5  -9 1431.55   59.01
 -12   5  -8  519.56   41.70
 -12   5  -7   44.11   20.31
 -12   5  -6  157.40   20.21
 -12   5  -5 3226.15   95.75
 -12   5  -4  799.65   58.38
 -12   5  -3 1615.69  101.42
 -12   5  -2    3.68   49.55
 -12   5  -1  768.20   56.70
 -12   5   0  521.80   44.57
 -12   5   1  344.05   41.12
 -12   5   2  349.08   35.45
 -12   5   3   89.93   27.10
 -12   5   4   97.29   44.00
 -12   5   5  818.67   96.93
 -12   5   6 2762.37  130.51
 -12   5   7    1.19   36.78
 -12   5   8 4004.95  179.83
 -12   5   9 1287.46  127.22
 -12   5  10 2508.23   84.32
 -12   5  11   29.44   52.91
 -12   5  12 1030.62   67.86
 -12   5  13  370.27   49.79
 -12   5  14  651.36   55.87
 -12   5  15   49.51   29.67
 -12   5  16 1589.89   61.87
 -12   5  17  366.56   31.03
 -12   5  18  494.51   31.95
 -12   5  19    1.04   14.15
 -12   5  20  311.09   20.16
 -12   5  21   21.20   19.11
 -12   5  22  307.98   33.99
 -12   5  23   44.36   27.54
 -12   6 -11   15.50   14.98
 -12   6 -10  553.72   30.48
 -12   6  -9  781.08   37.82
 -12   6  -8   29.94   19.52
 -12   6  -7  519.69   34.69
 -12   6  -6 3702.13   89.50
 -12   6  -5  172.00   30.42
 -12   6  -4   14.82   22.92
 -12   6  -3 1611.44   74.92
 -12   6  -2 2489.32  145.05
 -12   6  -1   79.82   62.70
 -12   6   0   13.42   21.23
 -12   6   1   54.03   28.62
 -12   6   2  679.53   51.20
 -12   6   3   35.96   34.91
 -12   6   4  686.50   50.86
 -12   6   5 1351.58   70.30
 -12   6   6    0.47   33.49
 -12   6   7  539.25   48.41
 -12   6   8  829.74   50.31
 -12   6   9 1198.29   60.32
 -12   6  10   85.83   26.44
 -12   6  11    1.12   29.57
 -12   6  12  327.18   38.96
 -12   6  13 1489.05   92.07
 -12   6  14   33.59   41.81
 -12   6  15   44.43   29.24
 -12   6  16 1244.11  114.77
 -12   6  17 4716.07  188.33
 -12   6  18  456.98   38.20
 -12   6  19  446.07   28.59
 -12   6  20  332.34   21.41
 -12   6  21   17.42   26.26
 -12   6  22    0.17   16.75
 -12   7 -10   54.84   49.03
 -12   7  -9   40.90   25.25
 -12   7  -8  325.98   23.21
 -12   7  -7 4138.62  112.43
 -12   7  -6 1026.14   61.55
 -12   7  -5  316.63   34.39
 -12   7  -4 1098.08   49.36
 -12   7  -3 1976.11   76.29
 -12   7  -2  250.81   38.01
 -12   7  -1   10.93   24.00
 -12   7   0 1821.79  120.69
 -12   7   1  194.50   55.09
 -12   7   2   16.47   28.35
 -12   7   3   89.93   27.39
 -12   7   4  749.45   42.69
 -12   7   5  218.74   32.04
 -12   7   6  159.43   28.72
 -12   7   7  623.03   52.61
 -12   7   8 1002.43   52.38
 -12   7   9   34.90   19.40
 -12   7  10   79.31   23.60
 -12   7  11  200.20   26.97
 -12   7  12   52.98   21.50
 -12   7  13   29.84   25.72
 -12   7  14   44.30   34.57
 -12   7  1512295.69  310.99
 -12   7  16  419.11   68.68
 -12   7  17  143.14   26.96
 -12   7  18  201.24   27.64
 -12   7  19 3766.37  107.84
 -12   7  20  631.73   49.96
 -12   7  21   48.49   22.63
 -12   8  -8 1029.03   52.34
 -12   8  -7  317.70   23.97
 -12   8  -6  461.68   37.88
 -12   8  -5 1200.10   43.48
 -12   8  -4 2782.10   67.02
 -12   8  -3   20.30   22.05
 -12   8  -2   22.17   17.91
 -12   8  -1  571.88   32.17
 -12   8   0  220.23   31.74
 -12   8   1  766.92   36.18
 -12   8   2   78.48   19.51
 -12   8   3  388.76   26.19
 -12   8   4   21.50   18.53
 -12   8   5  621.91   41.41
 -12   8   6  399.18   40.45
 -12   8   7 1032.51   61.38
 -12   8   8    6.51   20.95
 -12   8   9  299.71   38.43
 -12   8  10   45.14   31.17
 -12   8  11    0.36   35.22
 -12   8  12 2264.67   95.67
 -12   8  13 1908.88   69.16
 -12   8  14 1328.29  100.18
 -12   8  15   16.10   28.74
 -12   8  16 2793.94  174.38
 -12   8  17 4019.86  134.13
 -12   8  18 4419.47  109.23
 -12   8  19    4.81   27.15
 -12   9  -6 3694.47  283.27
 -12   9  -5  447.25   27.69
 -12   9  -4  302.46   24.20
 -12   9  -3  344.53   24.28
 -12   9  -2  289.81   30.05
 -12   9  -1    0.33   17.49
 -12   9   0   11.59   14.73
 -12   9   1   20.19   14.23
 -12   9   2  257.16   17.78
 -12   9   3  339.02   21.38
 -12   9   4  341.61   41.27
 -12   9   5  123.88   29.78
 -12   9   6   86.87   22.55
 -12   9   7  198.93   19.43
 -12   9   8    3.47   31.49
 -12   9   9  851.34   52.40
 -12   9  10    1.05   25.90
 -12   9  11   39.12   24.63
 -12   9  12  879.78   51.78
 -12   9  13  142.65   39.17
 -12   9  14 5526.86  295.51
 -12   9  15    6.35   47.20
 -12   9  16 3969.32  200.64
 -12  10  -2  440.08   30.22
 -12  10  -1  317.49   19.81
 -12  10   0  271.50   34.85
 -12  10   1  309.48   21.62
 -12  10   2    2.77   13.29
 -12  10   3   11.13   14.87
 -12  10   4  246.19   25.42
 -12  10   5   28.63   27.01
 -12  10   6  279.82   23.60
 -12  10   7    7.20   15.24
 -12  10   8  151.29   21.71
 -12  10   9   18.43   15.86
 -12  10  10   10.68   22.26
 -12  10  11  519.10   59.04
 -12  10  12   48.99   26.45
 -12  10  13  196.06   38.34
 -11   0  -9   91.92   38.85
 -11   0  -7  734.79   66.82
 -11   0  -5  395.63   88.40
 -11   0  -3 1572.93  140.65
 -11   0  -1  537.41  107.87
 -11   0   118280.75  672.04
 -11   0   3   41.83   54.43
 -11   0   5 2538.71  196.26
 -11   0   7    6.98   56.30
 -11   0   9 7242.46  351.98
 -11   0  11  475.59  116.05
 -11   0  13 1286.15  136.25
 -11   0  15   73.09   48.60
 -11   0  17 4525.99  180.35
 -11   0  19  647.57   60.11
 -11   0  21 1019.14   79.89
 -11   0  23    8.71   26.52
 -11   0  25    0.73   25.56
 -11   0  27  614.68   62.03
 -11   0  29    1.41   21.53
 -11   1 -10    8.76   30.28
 -11   1  -9  379.19   39.94
 -11   1  -8  683.93   56.07
 -11   1  -7   36.74   30.72
 -11   1  -6   23.93   38.20
 -11   1  -5  210.20   51.95
 -11   1  -4 2186.45  106.73
 -11   1  -3 6373.19  188.62
 -11   1  -2 1090.96   89.88
 -11   1  -1  956.81   80.60
 -11   1   0 4605.52  162.16
 -11   1   1 2120.58  130.57
 -11   1   2  451.23  132.83
 -11   1   3 5263.15  273.02
 -11   1   4 5758.72  207.74
 -11   1   5  156.28   49.99
 -11   1   6  801.03   69.27
 -11   1   7  761.22   86.19
 -11   1   8  137.77   57.31
 -11   1   9  171.92   51.16
 -11   1  10  152.58   54.95
 -11   1  11 3070.56  165.48
 -11   1  12 4108.28  236.18
 -11   1  13    0.76   91.21
 -11   1  14 2355.74  103.79
 -11   1  15  120.13   39.32
 -11   1  16    3.85   34.09
 -11   1  17 3156.21   97.92
 -11   1  18 1673.01   74.12
 -11   1  19  182.08   41.10
 -11   1  20 1477.13   61.06
 -11   1  21 2129.62   68.77
 -11   1  22 1120.81   58.28
 -11   1  23  323.40   32.06
 -11   1  24  257.09   28.88
 -11   1  25   71.74   20.73
 -11   1  26  737.12   45.05
 -11   1  27  108.59   18.92
 -11   1  28   32.35   15.03
 -11   1  29   13.13   17.27
 -11   2 -10   97.89   29.60
 -11   2  -9 1420.41   71.81
 -11   2  -8  288.92   42.58
 -11   2  -7 1422.60   79.23
 -11   2  -6    7.87   36.45
 -11   2  -5 4264.65  156.48
 -11   2  -4   51.31   43.91
 -11   2  -3 2260.66  104.23
 -11   2  -2  786.83   78.80
 -11   2  -113720.61  273.60
 -11   2   0 5011.21  184.13
 -11   2   1 1289.49   91.45
 -11   2   2 3761.60  132.90
 -11   2   3 9685.36  202.06
 -11   2   4  244.23   81.90
 -11   2   5   12.25   34.52
 -11   2   6   18.68   42.37
 -11   2   7  476.23   55.83
 -11   2   8 3800.19  157.49
 -11   2   9   11.82  167.45
 -11   2  1011114.77  277.50
 -11   2  11 1003.51  148.73
 -11   2  12  777.16   85.22
 -11   2  13  677.43   45.56
 -11   2  14  165.12   44.48
 -11   2  15 4802.11  137.89
 -11   2  16 1091.14   69.63
 -11   2  17 2721.06  118.80
 -11   2  18 2718.44   89.29
 -11   2  19 6318.35  140.03
 -11   2  20  225.28   38.89
 -11   2  21 5438.25  119.08
 -11   2  22  850.87   49.23
 -11   2  23 1951.79   77.21
 -11   2  24  112.90   25.93
 -11   2  25 1255.49   57.03
 -11   2  26  158.52   24.33
 -11   2  27    0.05   15.26
 -11   2  28   97.37   16.51
 -11   2  29   24.11   26.94
 -11   3 -10  720.26   50.64
 -11   3  -9   14.39   25.15
 -11   3  -8    3.17   33.44
 -11   3  -7  666.31   62.50
 -11   3  -6   70.45   33.11
 -11   3  -5  504.91   59.21
 -11   3  -4 1505.39   93.38
 -11   3  -3 3652.89  135.76
 -11   3  -2 1018.17   82.93
 -11   3  -1 4298.12  153.42
 -11   3   0 2000.70  101.99
 -11   3   1 7464.04  214.95
 -11   3   2 3978.13  147.11
 -11   3   3  420.50  113.26
 -11   3   4 1837.27  250.19
 -11   3   5 8426.43  201.60
 -11   3   6    6.43  108.18
 -11   3   7 1532.73  140.61
 -11   3   8 7651.71  209.37
 -11   3   9  359.55  164.30
 -11   3  10 4108.92  171.81
 -11   3  11 1747.54  176.55
 -11   3  12 3117.90  127.11
 -11   3  13 3618.47  124.48
 -11   3  14 1330.37   71.28
 -11   3  15  982.27   67.78
 -11   3  16 2375.09   92.00
 -11   3  17 3000.36  118.25
 -11   3  18 2309.71   86.89
 -11   3  19 4794.16  119.74
 -11   3  20 1775.84   70.64
 -11   3  21  975.69   56.31
 -11   3  22 1176.86   62.52
 -11   3  23 2835.67   95.48
 -11   3  24  475.30   36.18
 -11   3  25  744.32   39.72
 -11   3  26   95.00   18.78
 -11   3  27   38.58   16.77
 -11   3  28   82.62   17.43
 -11   3  29   15.54   16.98
 -11   4 -10 1372.27   69.05
 -11   4  -9    0.35   24.98
 -11   4  -8   10.31   24.39
 -11   4  -7 1364.98   74.64
 -11   4  -6    5.64   28.91
 -11   4  -5  395.55   49.96
 -11   4  -4  281.40   35.52
 -11   4  -3  253.61   44.78
 -11   4  -2 2420.82  107.70
 -11   4  -1  378.11   68.02
 -11   4   0 3036.69  156.78
 -11   4   1 1021.05  119.52
 -11   4   210336.81  281.34
 -11   4   3  531.38   89.64
 -11   4   4 1203.97   82.70
 -11   4   5  167.07   77.43
 -11   4   6 1722.21   93.53
 -11   4   7   54.11   79.10
 -11   4   8   25.30   63.88
 -11   4   910090.69  283.02
 -11   4  10 1705.18  118.47
 -11   4  11 1318.72  105.95
 -11   4  12  990.19   67.53
 -11   4  13  854.42   59.36
 -11   4  14  417.56   41.43
 -11   4  15  114.66   33.27
 -11   4  16 1512.06  101.27
 -11   4  17 1206.04   62.71
 -11   4  18  707.47   60.03
 -11   4  19  262.90   35.25
 -11   4  20 3529.03  104.38
 -11   4  21   28.52   25.95
 -11   4  22   14.07   21.32
 -11   4  23  172.62   24.02
 -11   4  24  472.07   32.14
 -11   4  25   62.34   19.81
 -11   4  26  427.46   28.99
 -11   4  27  239.96   20.65
 -11   4  28   19.29   21.66
 -11   5 -10  123.63   23.64
 -11   5  -9    1.44   25.45
 -11   5  -8 2082.18   78.48
 -11   5  -7 3161.39  110.25
 -11   5  -6  526.81   41.10
 -11   5  -5 3689.22  157.31
 -11   5  -4  607.35   98.22
 -11   5  -3  203.80   45.75
 -11   5  -2    1.95   36.56
 -11   5  -1  460.38   52.42
 -11   5   0  645.09   86.11
 -11   5   1   77.41   48.90
 -11   5   2   81.77   50.28
 -11   5   3 1123.84  125.63
 -11   5   4 1980.38  126.70
 -11   5   5  299.05   63.29
 -11   5   6  571.30   81.69
 -11   5   7 1537.01  109.76
 -11   5   8   19.01   53.97
 -11   5   9  505.97   59.92
 -11   5  10  145.87   45.65
 -11   5  11 2890.68  111.23
 -11   5  12  511.55   50.95
 -11   5  13   79.75   36.88
 -11   5  14   29.15   35.01
 -11   5  15  447.14   47.70
 -11   5  16   24.99   39.95
 -11   5  17 1510.10   90.56
 -11   5  18    3.03   39.81
 -11   5  19  135.50   31.92
 -11   5  20    0.41   21.84
 -11   5  21  240.47   25.63
 -11   5  22    7.44   19.50
 -11   5  23  603.04   29.84
 -11   5  24   78.72   23.01
 -11   5  25  952.37   46.70
 -11   5  26    1.45   15.67
 -11   5  27   59.47   16.60
 -11   6 -10  738.49   46.76
 -11   6  -9 6091.24  117.63
 -11   6  -8 8949.89  180.29
 -11   6  -7   18.14   35.98
 -11   6  -6  932.52   61.16
 -11   6  -5 4998.66  164.86
 -11   6  -4 3896.46  186.36
 -11   6  -3  117.33   29.71
 -11   6  -2 1074.60   71.14
 -11   6  -1  262.64   35.42
 -11   6   0  238.24   48.76
 -11   6   1   19.80   52.68
 -11   6   2 1108.60   83.07
 -11   6   3    3.74   44.34
 -11   6   4 1887.03   98.85
 -11   6   5  239.24   69.80
 -11   6   6  128.56   34.75
 -11   6   7   14.32   42.64
 -11   6   8  270.51   46.27
 -11   6   9    7.80   34.82
 -11   6  10  149.47   24.89
 -11   6  11  356.67   45.67
 -11   6  12   54.55   26.37
 -11   6  13  234.23   31.69
 -11   6  14 1189.18   70.53
 -11   6  15    1.66   29.39
 -11   6  16  151.52   36.58
 -11   6  17 1383.56   85.78
 -11   6  18 2839.60  124.32
 -11   6  19  159.79   31.53
 -11   6  20  422.31   34.01
 -11   6  21   64.04   19.32
 -11   6  22  575.49   31.68
 -11   6  23  465.62   32.93
 -11   6  24   21.68   17.65
 -11   6  25   79.47   19.80
 -11   6  26 3132.36  141.46
 -11   6  27 1067.00  154.33
 -11   7 -10 2238.05   67.58
 -11   7  -9  879.22   49.72
 -11   7  -8  239.28   26.52
 -11   7  -7 1491.58   60.65
 -11   7  -616057.65  228.49
 -11   7  -5 3626.61  118.98
 -11   7  -4  196.39   38.56
 -11   7  -3 2465.83  166.76
 -11   7  -2 2436.14  125.86
 -11   7  -1  426.98   42.54
 -11   7   0  978.54   62.77
 -11   7   1 1711.43  155.29
 -11   7   2 4338.43  137.32
 -11   7   3    0.23   44.10
 -11   7   4 4591.29  153.47
 -11   7   5  221.32  177.51
 -11   7   6 2471.62  104.68
 -11   7   7  665.68  106.78
 -11   7   8  718.89   53.05
 -11   7   9    0.03   34.87
 -11   7  10   13.07   26.89
 -11   7  11    0.93   35.85
 -11   7  12  743.27   47.42
 -11   7  13  330.84   39.26
 -11   7  14  496.31   35.81
 -11   7  15   21.61   27.01
 -11   7  16 8228.18  224.91
 -11   7  17  841.52   60.67
 -11   7  18    8.15   26.40
 -11   7  19  353.15   31.89
 -11   7  20  594.97   31.39
 -11   7  21  726.21   31.87
 -11   7  22    0.48   15.99
 -11   7  23  692.49   42.60
 -11   7  24 4328.14  168.48
 -11   7  25   44.49   17.56
 -11   8 -10  258.99   25.93
 -11   8  -9 2437.22   77.56
 -11   8  -8 3775.72   95.04
 -11   8  -7 5506.96  121.67
 -11   8  -6  999.73   60.57
 -11   8  -5  866.75   52.40
 -11   8  -4 2360.68  118.68
 -11   8  -3 3073.06  138.80
 -11   8  -2  617.98   55.03
 -11   8  -1 1440.07   95.73
 -11   8   0   28.88   31.87
 -11   8   1 1202.50   96.58
 -11   8   2 5315.82  165.66
 -11   8   3  522.75   74.71
 -11   8   4 1911.15  100.81
 -11   8   5 7610.68  296.42
 -11   8   6 4249.40  265.38
 -11   8   7  209.48   76.20
 -11   8   8  625.89   53.86
 -11   8   9 1151.89   65.78
 -11   8  10  301.96   32.68
 -11   8  11  240.97   29.44
 -11   8  12 1036.31   73.18
 -11   8  13 3077.08  103.96
 -11   8  14  985.72   66.14
 -11   8  15 1589.57   65.93
 -11   8  16  404.82   40.56
 -11   8  17 2189.29  100.57
 -11   8  18 1762.00   83.73
 -11   8  19 1660.26   62.72
 -11   8  20  111.68   24.02
 -11   8  21   57.07   19.19
 -11   8  22  158.86   16.01
 -11   8  23  358.53   55.24
 -11   8  24  430.80   68.72
 -11   9 -10   15.62   16.27
 -11   9  -9  469.93   33.53
 -11   9  -8   43.18   28.20
 -11   9  -7 2779.81  100.54
 -11   9  -6    0.48   30.21
 -11   9  -5 5853.49  276.81
 -11   9  -4 1182.90   73.04
 -11   9  -3 1677.97   91.86
 -11   9  -2   69.90   43.10
 -11   9  -1  713.16   52.16
 -11   9   0 1019.12   67.91
 -11   9   1  466.44   46.75
 -11   9   2  168.22   86.36
 -11   9   311255.71  277.10
 -11   9   4  385.65  146.80
 -11   9   5   23.67   28.64
 -11   9   6   78.22   32.02
 -11   9   7 4201.64  122.67
 -11   9   8    4.59   51.97
 -11   9   9   52.41   27.74
 -11   9  10    0.61   22.49
 -11   9  11  325.22   34.73
 -11   9  12   26.29   25.18
 -11   9  13  370.94   45.45
 -11   9  14   12.28   26.70
 -11   9  15 7798.91  177.36
 -11   9  16   47.18   28.37
 -11   9  17 1353.08   74.09
 -11   9  18  116.06   32.32
 -11   9  19 1159.15  106.01
 -11   9  20   59.90   17.57
 -11   9  21    0.22   14.96
 -11   9  22   23.87   17.89
 -11   9  23  369.90   38.96
 -11  10 -10  863.12   46.51
 -11  10  -9   10.38   33.98
 -11  10  -8  943.74   46.81
 -11  10  -7  873.91   42.17
 -11  10  -6  189.79   18.47
 -11  10  -5   70.80   19.38
 -11  10  -4  705.46   42.15
 -11  10  -3  285.15   25.27
 -11  10  -2  363.84   28.20
 -11  10  -1   59.09   20.25
 -11  10   0    4.11   23.34
 -11  10   1 2526.67  113.62
 -11  10   2  144.43   51.94
 -11  10   3   62.49   24.21
 -11  10   4 1037.17   56.19
 -11  10   5 2582.90  123.55
 -11  10   6  820.41  129.19
 -11  10   7   14.51   30.90
 -11  10   8  212.87   31.88
 -11  10   9  100.82   23.11
 -11  10  10   13.01   20.31
 -11  10  11   69.54   21.67
 -11  10  12  364.20   30.43
 -11  10  13  170.69   24.97
 -11  10  14  160.51   25.31
 -11  10  15    3.59   25.79
 -11  10  16   40.35   29.50
 -11  10  17 1264.13   72.25
 -11  10  18 1483.05   96.32
 -11  10  19  441.02   32.02
 -11  10  20   40.73   19.04
 -11  10  21   83.10   27.01
 -11  11  -8   16.04   17.42
 -11  11  -7  591.69   50.32
 -11  11  -6  547.26   48.52
 -11  11  -5  226.65   18.35
 -11  11  -4   35.01   13.40
 -11  11  -3   38.38   24.96
 -11  11  -2  158.81   18.43
 -11  11  -1   76.21   23.30
 -11  11   0   73.63   17.54
 -11  11   1    5.31   20.65
 -11  11   2  463.23   30.93
 -11  11   3    6.53   20.96
 -11  11   4   95.67   21.65
 -11  11   5  458.38   38.11
 -11  11   6   73.23   38.89
 -11  11   7    3.84   24.57
 -11  11   8 1425.62   83.15
 -11  11   9    1.64   32.66
 -11  11  10  393.52   57.71
 -11  11  11  169.44   46.92
 -11  11  12 1658.54  107.18
 -11  11  13    3.49   29.78
 -11  11  14   63.18   34.20
 -11  11  15    1.93   25.53
 -11  11  16  882.15   62.03
 -11  11  17   12.00   22.72
 -11  11  18   66.78   24.41
 -11  12  -5   93.36   51.01
 -11  12  -4    4.05   21.00
 -11  12  -3    2.25   15.34
 -11  12  -2   40.20   13.30
 -11  12  -1   84.71   15.54
 -11  12   0    0.25   15.24
 -11  12   1   17.95   13.31
 -11  12   2  155.70   17.70
 -11  12   3    2.19   15.46
 -11  12   4   32.45   18.28
 -11  12   5  139.22   21.24
 -11  12   6 1151.84   69.05
 -11  12   7   15.77   20.07
 -11  12   8 2955.81  128.41
 -11  12   9 1987.21   98.66
 -11  12  10 5481.49  241.69
 -11  12  11  446.52   59.46
 -11  12  12  240.09   33.71
 -11  12  13  491.34   37.91
 -11  12  14  525.89   38.79
 -11  12  15    2.93   35.72
 -11  13   2   45.66   18.35
 -11  13   3   13.08   18.23
 -11  13   4    5.29   19.64
 -11  13   5   80.82   16.35
 -11  13   6  405.28   62.48
 -11  13   7 5260.95  134.88
 -11  13   8  222.35   79.49
 -10   0  -8  240.29   97.39
 -10   0  -6  262.96   78.66
 -10   0  -4   49.15   57.93
 -10   0  -2 1043.53  138.38
 -10   0   0  242.07   68.59
 -10   0   2 8439.25  285.53
 -10   0   4  345.03   69.79
 -10   0   6 1932.41  155.33
 -10   0   8  129.53   81.47
 -10   0  10 9118.24  527.12
 -10   0  12  661.63  112.61
 -10   0  14   71.11   56.26
 -10   0  16  279.17   49.78
 -10   0  1813588.92  272.65
 -10   0  20 1936.82  108.41
 -10   0  22 2158.27   97.68
 -10   0  24   67.97   39.53
 -10   0  26 1282.29   70.26
 -10   0  28 6618.00  179.08
 -10   0  30 1348.39   71.03
 -10   0  32  152.06   52.20
 -10   1  -9 3785.09  141.88
 -10   1  -8  794.61   67.50
 -10   1  -7 2020.30   97.92
 -10   1  -6    4.02   45.85
 -10   1  -5   55.47   43.93
 -10   1  -4  859.13   79.05
 -10   1  -3 4140.79  176.74
 -10   1  -2 3392.89  140.54
 -10   1  -1    2.44   44.38
 -10   1   0  142.77   41.36
 -10   1   1 2606.28  124.42
 -10   1   2  632.11   74.82
 -10   1   3  336.39   64.27
 -10   1   4 6257.90  168.56
 -10   1   5    0.70   40.25
 -10   1   6 1096.47   90.54
 -10   1   7  758.52  110.14
 -10   1   8  441.25  104.86
 -10   1   9 4421.04  276.95
 -10   1  10 4606.70  424.22
 -10   1  11 1520.82  151.03
 -10   1  12 2831.27  162.25
 -10   1  13 6223.56  198.80
 -10   1  14 1347.53   89.86
 -10   1  15 6968.89  180.70
 -10   1  16  344.71   39.89
 -10   1  17  358.75   39.02
 -10   1  18 4951.31  127.64
 -10   1  19 2843.35   91.71
 -10   1  20 4017.20  107.68
 -10   1  21 2176.77   73.33
 -10   1  22 1000.20   51.37
 -10   1  23   17.54   24.23
 -10   1  24    1.29   22.41
 -10   1  25  303.86   31.82
 -10   1  26 1962.50   63.30
 -10   1  27   92.11   22.32
 -10   1  28  515.65   32.65
 -10   1  29 1811.59   64.84
 -10   1  30 1624.86   75.92
 -10   1  31  111.14   31.01
 -10   1  32    1.50   29.67
 -10   2  -9   56.06   39.93
 -10   2  -8 3220.64  138.39
 -10   2  -7  219.13   53.45
 -10   2  -613467.44  298.27
 -10   2  -5   64.20   58.36
 -10   2  -4 7746.46  236.93
 -10   2  -3 5722.24  207.21
 -10   2  -2 8811.40  253.59
 -10   2  -1 1371.63  115.84
 -10   2   0 9011.60  265.78
 -10   2   1  620.67   90.66
 -10   2   2  254.04   81.65
 -10   2   3  866.39   77.26
 -10   2   4    2.70   39.19
 -10   2   5 1035.71   76.70
 -10   2   6  792.16  116.62
 -10   2   7    3.19   80.60
 -10   2   822522.18 1051.35
 -10   2   9  900.77  154.55
 -10   2  10    2.94  111.39
 -10   2  11 6803.10  382.25
 -10   2  1226563.65  499.01
 -10   2  13   33.74   69.29
 -10   2  14 1591.16   92.65
 -10   2  15   11.49   45.97
 -10   2  1613834.23  286.76
 -10   2  17 5440.11  171.55
 -10   2  18  738.62   59.48
 -10   2  19 6185.87  137.30
 -10   2  20 2819.03   84.14
 -10   2  21  156.63   32.52
 -10   2  22  307.45   29.92
 -10   2  23 1394.68   62.06
 -10   2  24    4.85   24.23
 -10   2  25   85.55   23.45
 -10   2  26  387.91   31.68
 -10   2  27 1871.13   58.59
 -10   2  28  748.40   37.68
 -10   2  29   11.52   16.99
 -10   2  30 1012.63   54.79
 -10   2  31  208.93   29.17
 -10   2  32   47.54   27.16
 -10   3  -9  119.31   45.33
 -10   3  -8 9365.38  253.11
 -10   3  -7 4063.49  160.93
 -10   3  -6 7052.71  209.59
 -10   3  -5 9236.11  243.17
 -10   3  -4 2514.19  130.82
 -10   3  -3 9405.90  262.07
 -10   3  -210818.72  281.74
 -10   3  -1 1174.75   97.50
 -10   3   0 2958.26  149.93
 -10   3   1 2224.88  121.77
 -10   3   2 3846.11  147.14
 -10   3   3  587.27   72.35
 -10   3   4    8.94   41.45
 -10   3   5 1389.93   99.89
 -10   3   6  805.59   66.60
 -10   3   7  482.72   58.36
 -10   3   8  838.79   79.43
 -10   3   9  164.64   62.23
 -10   3  1022973.04  639.71
 -10   3  1114377.98  326.13
 -10   3  12 1720.08  181.73
 -10   3  13  228.26   73.66
 -10   3  1420586.10  311.66
 -10   3  15 2827.16  110.82
 -10   3  16 1921.55   93.68
 -10   3  17 5196.34  142.05
 -10   3  18 2476.99  105.71
 -10   3  19  600.97   49.99
 -10   3  20 4811.78  141.30
 -10   3  21 6575.54  131.57
 -10   3  22  151.59   29.30
 -10   3  23   25.90   30.60
 -10   3  24    0.66   27.63
 -10   3  25    6.66   25.51
 -10   3  26  136.63   28.38
 -10   3  27  516.78   35.74
 -10   3  28 2377.08  109.14
 -10   3  29   51.18   17.86
 -10   3  30  194.78   23.09
 -10   3  31  193.14   20.51
 -10   3  32  852.77   59.62
 -10   4  -9  579.38   65.15
 -10   4  -8 1919.01  114.51
 -10   4  -7  903.30   84.87
 -10   4  -6 1517.09  104.17
 -10   4  -514175.12  301.92
 -10   4  -4 6183.29  194.67
 -10   4  -3 2913.35  142.21
 -10   4  -2 1600.43  119.37
 -10   4  -114178.86  337.74
 -10   4   0  607.75   83.41
 -10   4   1 1136.28   88.47
 -10   4   2  682.44   63.99
 -10   4   3 2408.88  119.80
 -10   4   4    3.43   36.54
 -10   4   5   14.36   36.99
 -10   4   6   10.54   41.53
 -10   4   7 5791.72  195.21
 -10   4   8    0.69   58.25
 -10   4   9 1852.09  109.81
 -10   4  1010891.58  257.80
 -10   4  11  733.97   81.78
 -10   4  12  982.35   89.56
 -10   4  13 8556.45  206.00
 -10   4  14 1045.96   85.12
 -10   4  15  993.96   73.31
 -10   4  16  633.97   57.86
 -10   4  17 4068.53  124.08
 -10   4  18 2815.03  103.41
 -10   4  19 1404.85   68.09
 -10   4  20  753.04   49.13
 -10   4  21   99.47   38.68
 -10   4  22  737.39   50.94
 -10   4  23  341.79   37.36
 -10   4  24 1135.19   55.07
 -10   4  25 1823.07   66.64
 -10   4  26  227.56   28.15
 -10   4  27    1.03   18.37
 -10   4  28   19.68   19.60
 -10   4  29 1620.53   80.43
 -10   4  30    0.94   17.83
 -10   4  31  482.76   29.54
 -10   5  -9  136.99   43.96
 -10   5  -8 1198.65   79.81
 -10   5  -7  692.37   77.79
 -10   5  -6 5799.49  218.48
 -10   5  -5  548.28   74.80
 -10   5  -4 7844.45  253.81
 -10   5  -3 3388.64  177.05
 -10   5  -2   86.11   61.93
 -10   5  -1   88.47   62.10
 -10   5   0  447.48   68.14
 -10   5   1 1849.93  108.54
 -10   5   2 2549.38  138.15
 -10   5   3  246.47   47.11
 -10   5   4 3893.58  138.56
 -10   5   5  307.97   48.09
 -10   5   6   90.18   39.41
 -10   5   7   74.06   39.35
 -10   5   8 1253.14   85.73
 -10   5   9 1013.35   68.13
 -10   5  10 1124.06   84.34
 -10   5  11  106.60   39.92
 -10   5  12 9071.39  239.57
 -10   5  13 2554.95  123.64
 -10   5  14  131.44   37.83
 -10   5  15  168.75   38.71
 -10   5  16   12.97   34.03
 -10   5  17   29.16   30.49
 -10   5  18  473.17   43.56
 -10   5  19    2.80   32.84
 -10   5  20  685.96   49.16
 -10   5  21  335.77   33.53
 -10   5  22  227.80   33.20
 -10   5  23  766.00   45.47
 -10   5  24   36.40   24.85
 -10   5  25    3.90   21.48
 -10   5  26  361.58   28.07
 -10   5  27 1083.67   46.15
 -10   5  28  213.92   25.36
 -10   5  29  133.98   18.51
 -10   5  30   19.50   15.03
 -10   5  31  587.76   50.31
 -10   6  -9  102.60   37.56
 -10   6  -8 4042.90  137.47
 -10   6  -710137.46  248.30
 -10   6  -6   65.10   42.88
 -10   6  -5    4.65   44.15
 -10   6  -4 1252.17   92.21
 -10   6  -3  706.43   79.68
 -10   6  -2  136.30   41.83
 -10   6  -1   90.91   45.59
 -10   6   0 1276.53  100.68
 -10   6   1 5557.87  214.14
 -10   6   2  885.07  105.40
 -10   6   3 2455.96  146.33
 -10   6   4 1280.69  106.20
 -10   6   5 8081.24  188.68
 -10   6   6 1355.94   82.56
 -10   6   7  912.69   66.32
 -10   6   8   96.52   36.14
 -10   6   9 2279.51   97.78
 -10   6  10  511.63   53.60
 -10   6  11  816.51   72.10
 -10   6  12 1125.01   64.63
 -10   6  13 2680.11  117.75
 -10   6  14  921.10   62.72
 -10   6  15  393.99   50.18
 -10   6  16   88.57   31.07
 -10   6  17  755.44   55.49
 -10   6  18  366.05   44.93
 -10   6  19  706.83   64.09
 -10   6  20   34.03   28.82
 -10   6  21  489.75   45.49
 -10   6  22  198.98   39.25
 -10   6  23  345.54   30.59
 -10   6  24 1701.52   65.69
 -10   6  25   57.07   28.10
 -10   6  26  167.03   24.29
 -10   6  27  993.47   49.09
 -10   6  28  887.09   38.26
 -10   6  29   80.09   18.99
 -10   6  30   18.14   14.53
 -10   7  -9 1532.60   71.29
 -10   7  -8 1768.84   93.73
 -10   7  -7  731.56   58.89
 -10   7  -6 1433.11   81.24
 -10   7  -5 4277.50  160.62
 -10   7  -4 2673.95  174.53
 -10   7  -3   19.81   40.11
 -10   7  -2  604.86   57.58
 -10   7  -1 2874.00  124.78
 -10   7   0   13.73   43.40
 -10   7   1 1462.65   95.79
 -10   7   2  240.97   95.93
 -10   7   328998.40  407.14
 -10   7   4 1215.87  203.36
 -10   7   5 5796.23  135.06
 -10   7   6 1278.63   77.09
 -10   7   7 6619.55  145.00
 -10   7   8 1409.03   71.53
 -10   7   9   12.84   35.70
 -10   7  10 1480.20   71.44
 -10   7  11 1086.13   64.09
 -10   7  12  172.73   41.52
 -10   7  13 1342.32   70.27
 -10   7  14 1688.09   90.09
 -10   7  15   17.30   31.70
 -10   7  16   62.30   30.71
 -10   7  17   45.48   31.24
 -10   7  18  443.26   44.28
 -10   7  19    1.91   27.45
 -10   7  20  471.40   45.88
 -10   7  21 1028.88   54.76
 -10   7  22  328.75   39.65
 -10   7  23   41.08   24.34
 -10   7  24  421.63   30.17
 -10   7  25 4669.00  137.79
 -10   7  26   26.45   20.60
 -10   7  27  591.86   31.80
 -10   7  28    7.86   19.86
 -10   7  29 1030.34   52.95
 -10   8  -9 3088.10   95.87
 -10   8  -8  772.67   52.26
 -10   8  -7  160.20   36.13
 -10   8  -6 3827.96  119.80
 -10   8  -5 2757.47  120.93
 -10   8  -4    7.64   34.92
 -10   8  -3  134.06   44.32
 -10   8  -2   12.86   38.42
 -10   8  -1  421.54   62.93
 -10   8   0 6005.06  204.74
 -10   8   1 6534.72  195.13
 -10   8   213936.79  323.86
 -10   8   3 3405.35  132.58
 -10   8   4 1995.26  101.10
 -10   8   510801.50  305.53
 -10   8   619609.39  283.43
 -10   8   7  832.62  155.29
 -10   8   8  806.08   59.85
 -10   8   9 1629.40   79.40
 -10   8  10  200.30   31.56
 -10   8  11 1974.96   85.16
 -10   8  12  275.58   33.43
 -10   8  13  174.96   30.98
 -10   8  14  143.03   28.80
 -10   8  15  675.17   55.83
 -10   8  16   52.18   32.31
 -10   8  17   19.66   27.44
 -10   8  18    5.17   32.29
 -10   8  19   44.80   28.17
 -10   8  20   58.27   22.79
 -10   8  21    2.89   24.49
 -10   8  22  681.61   42.26
 -10   8  23 1331.29   64.16
 -10   8  24 1890.28   72.08
 -10   8  25   14.84   18.34
 -10   8  26 1152.56   50.79
 -10   8  27 2537.93  158.95
 -10   8  28 3636.44  134.36
 -10   9  -9  321.19   30.73
 -10   9  -8    0.57   23.47
 -10   9  -7  658.21   44.01
 -10   9  -6 1227.86   71.02
 -10   9  -5   50.66   31.81
 -10   9  -4  826.37   51.93
 -10   9  -3 2513.05  108.91
 -10   9  -2   23.13   38.50
 -10   9  -1   16.25   53.63
 -10   9   0 9768.81  220.59
 -10   9   1  718.94   89.04
 -10   9   2 7860.86  173.37
 -10   9   3  331.53   76.47
 -10   9   429364.44  340.66
 -10   9   5  995.93  157.63
 -10   9   6 1169.21   61.50
 -10   9   7   60.07   30.76
 -10   9   8 4013.19  104.32
 -10   9   9  707.44   49.43
 -10   9  10   36.41   26.30
 -10   9  11  134.97   26.89
 -10   9  12 1563.83   62.59
 -10   9  13  535.15   36.56
 -10   9  14   27.34   25.48
 -10   9  15    0.16   24.20
 -10   9  16  936.23   46.81
 -10   9  17   10.97   22.06
 -10   9  18   20.33   29.56
 -10   9  19   63.44   26.33
 -10   9  20    0.40   22.54
 -10   9  21   45.77   18.90
 -10   9  22  162.44   22.43
 -10   9  23  312.72   26.38
 -10   9  24 1532.68   64.47
 -10   9  25  115.18   26.42
 -10   9  26 4640.13  328.90
 -10   9  27  362.88   71.70
 -10  10  -9  298.01   27.07
 -10  10  -8   72.53   22.41
 -10  10  -7  725.68   40.02
 -10  10  -6   10.92   27.48
 -10  10  -5   82.20   25.46
 -10  10  -4 1129.04   59.33
 -10  10  -3  219.63   27.07
 -10  10  -2   52.43   33.63
 -10  10  -1 1440.13  103.72
 -10  10   0    9.67   33.70
 -10  10   1 1718.07   77.22
 -10  10   2 4458.56  111.88
 -10  10   3  270.93   42.23
 -10  10   4  483.94   45.09
 -10  10   5 3033.71   89.44
 -10  10   6 4536.23  112.20
 -10  10   7 2144.44   77.51
 -10  10   8  369.13   35.54
 -10  10   9    1.97   23.86
 -10  10  10 1241.01   61.16
 -10  10  11   32.40   24.60
 -10  10  12  230.19   27.29
 -10  10  13   65.06   23.07
 -10  10  14  115.19   27.29
 -10  10  15    4.00   25.23
 -10  10  16    2.41   21.36
 -10  10  17  340.26   42.09
 -10  10  18 1231.77   79.99
 -10  10  19  368.24   36.73
 -10  10  20  869.22   48.24
 -10  10  21  147.18   22.97
 -10  10  22    0.26   24.36
 -10  10  23  506.33   37.23
 -10  10  24   72.01   20.35
 -10  10  25  133.02   27.06
 -10  11  -9  288.77   21.82
 -10  11  -8    5.03   17.66
 -10  11  -7  330.10   30.01
 -10  11  -6   10.50   21.76
 -10  11  -5 4403.37  117.06
 -10  11  -4   53.48   24.81
 -10  11  -3  112.74   28.98
 -10  11  -2  863.55   57.57
 -10  11  -1 1307.12   69.81
 -10  11   0  146.54   33.31
 -10  11   1    2.30   28.91
 -10  11   2   19.68   24.31
 -10  11   3 1493.48   65.61
 -10  11   4  115.29   29.35
 -10  11   5   26.40   24.10
 -10  11   6  207.81   25.91
 -10  11   7  134.67   24.35
 -10  11   8    1.18   22.04
 -10  11   9  767.85   46.50
 -10  11  10   88.02   24.53
 -10  11  11  856.45   52.31
 -10  11  12   37.43   24.57
 -10  11  13  619.52   47.84
 -10  11  14   24.15   25.94
 -10  11  15  846.53   52.35
 -10  11  16  165.19   32.30
 -10  11  17 2445.98   93.05
 -10  11  18    6.96   29.23
 -10  11  19  558.29   41.48
 -10  11  20   81.34   20.95
 -10  11  21 2157.29   93.95
 -10  11  22  496.85   40.49
 -10  11  23  142.38   30.37
 -10  12  -9  160.48   26.97
 -10  12  -8    1.43   20.92
 -10  12  -7  976.58   58.40
 -10  12  -6  444.06   35.36
 -10  12  -5  497.64   30.67
 -10  12  -4  442.03   37.91
 -10  12  -3 3999.62  105.77
 -10  12  -2 2281.32   98.97
 -10  12  -1    3.39   30.17
 -10  12   0   33.80   32.12
 -10  12   1 1914.92   99.66
 -10  12   2  584.35   48.59
 -10  12   3   54.31   31.19
 -10  12   4   71.65   21.31
 -10  12   5    1.99   20.04
 -10  12   6   92.60   23.29
 -10  12   7 1036.41   56.21
 -10  12   8   38.88   25.13
 -10  12   9 2190.99   90.39
 -10  12  10 1200.34   80.87
 -10  12  11 3083.49   91.62
 -10  12  12    6.82   44.49
 -10  12  13    2.79   24.81
 -10  12  14  583.21   42.43
 -10  12  15  111.29   28.49
 -10  12  16  342.49   42.41
 -10  12  17  791.30   72.74
 -10  12  18  844.18   77.56
 -10  12  19 6114.25  167.79
 -10  12  20  369.86   51.57
 -10  12  21   25.06   51.75
 -10  13  -9    0.51   21.97
 -10  13  -8   14.42   21.02
 -10  13  -7   62.62   21.23
 -10  13  -6  442.39   27.16
 -10  13  -5  437.25   23.58
 -10  13  -4 2331.00   63.79
 -10  13  -3  432.50   35.11
 -10  13  -2 1132.04   49.09
 -10  13  -1  290.04   42.78
 -10  13   0 2840.35  101.00
 -10  13   1  178.43   37.64
 -10  13   2  302.25   25.58
 -10  13   3  101.97   20.22
 -10  13   4 1665.63   60.58
 -10  13   5   14.99   18.01
 -10  13   6  482.90   25.19
 -10  13   7   14.95   33.59
 -10  13   8 5571.08  122.15
 -10  13   9  425.95   36.94
 -10  13  10  201.74   28.27
 -10  13  11   98.76   29.03
 -10  13  12 3218.89   97.33
 -10  13  13  514.57   58.62
 -10  13  14   13.53   21.96
 -10  13  15  151.27   25.91
 -10  13  16 1046.90   86.93
 -10  13  17  290.98   40.99
 -10  13  18  528.82   81.57
 -10  14  -5  475.98   50.21
 -10  14  -4  541.15   50.24
 -10  14  -3  282.45   22.94
 -10  14  -2  486.29   34.46
 -10  14  -1  334.20   26.80
 -10  14   0  452.61   35.81
 -10  14   1   74.49   19.00
 -10  14   2  206.14   22.22
 -10  14   3  113.71   15.37
 -10  14   4  240.84   25.55
 -10  14   5  865.87   70.21
 -10  14   6 1490.31   79.73
 -10  14   7    0.03   17.02
 -10  14   8  118.18   21.60
 -10  14   9  767.18   61.89
 -10  14  10 4274.65  134.12
 -10  14  11  405.84   42.87
 -10  14  12   17.94   19.96
 -10  14  13  575.97   38.73
 -10  14  14   49.94   33.54
  -9   0  -7  526.68   65.65
  -9   0  -5 1805.63  146.46
  -9   0  -315849.96  547.79
  -9   0  -1  489.78   72.23
  -9   0   1  682.21   83.16
  -9   0   3 4399.22  225.41
  -9   0   5 7223.62  315.22
  -9   0   7 5207.68  397.11
  -9   0   9    4.78  230.26
  -9   0  11 1234.71  711.73
  -9   0  13  100.24  101.40
  -9   0  15   17.86   66.50
  -9   0  17   33.00   40.16
  -9   0  1911039.07  248.53
  -9   0  21  815.63   58.23
  -9   0  23   92.86   38.56
  -9   0  25  212.18   50.71
  -9   0  27 7687.62  191.74
  -9   0  2911422.64  333.53
  -9   0  31 3285.83  121.89
  -9   0  33  557.94   70.51
  -9   1  -8 5869.25  182.67
  -9   1  -7 2312.71  135.47
  -9   1  -6 5077.97  193.98
  -9   1  -5 2721.22  114.24
  -9   1  -4   81.20   43.25
  -9   1  -3 3316.24  169.34
  -9   1  -2  105.32   44.22
  -9   1  -1 2016.47  107.82
  -9   1   0 2937.02  125.42
  -9   1   1   26.39   48.45
  -9   1   2 3129.90  126.61
  -9   1   3 2050.07  133.99
  -9   1   4 1524.34  130.02
  -9   1   520420.46  528.57
  -9   1   6 3404.35  236.90
  -9   1   7  533.61   97.50
  -9   1   810093.72  372.01
  -9   1   9 2536.46  220.13
  -9   1  10 7770.18  258.03
  -9   1  11 6827.25  242.35
  -9   1  12 1142.77   78.07
  -9   1  13 1415.34  105.63
  -9   1  14 3725.82  131.08
  -9   1  15  178.89   32.17
  -9   1  16 1468.32   87.50
  -9   1  17 1464.27   81.05
  -9   1  18 1746.52   89.56
  -9   1  19  681.90   56.38
  -9   1  20  589.61   56.07
  -9   1  21 3807.22   98.68
  -9   1  22 2109.23   75.97
  -9   1  23   15.58   26.53
  -9   1  24  443.83   32.32
  -9   1  25  608.37   45.69
  -9   1  26 3644.30   93.16
  -9   1  27 4706.17  102.53
  -9   1  28 1565.86   63.34
  -9   1  29 2530.52   73.74
  -9   1  30 5502.13  171.15
  -9   1  31 3672.41   95.34
  -9   1  32  167.02   23.25
  -9   1  33    2.58   18.97
  -9   1  34    8.51   20.22
  -9   2  -8 1461.24   90.99
  -9   2  -7 1149.36   82.86
  -9   2  -6 2758.48  130.50
  -9   2  -5 9167.06  232.29
  -9   2  -4 2564.71  114.75
  -9   2  -3 2629.89  116.51
  -9   2  -212106.44  275.92
  -9   2  -1 2707.38  105.71
  -9   2   0    4.52   37.67
  -9   2   1 2561.77  141.65
  -9   2   2  855.96   83.33
  -9   2   3 9060.10  227.21
  -9   2   4 1008.74   70.15
  -9   2   526311.90  736.75
  -9   2   6 5686.40  530.01
  -9   2   717231.46  818.91
  -9   2   8    6.14  125.77
  -9   2   945273.77 1142.81
  -9   2  10  329.80  163.04
  -9   2  11 2269.91  148.13
  -9   2  12 3484.68  168.27
  -9   2  1315667.08  303.54
  -9   2  14   53.72   41.69
  -9   2  15  556.72   50.46
  -9   2  16  550.54   35.34
  -9   2  17 2085.52   97.72
  -9   2  18 4293.89  135.06
  -9   2  19  359.79   52.11
  -9   2  20 9484.95  177.88
  -9   2  21  522.95   38.63
  -9   2  22  191.97   28.55
  -9   2  23  752.94   44.42
  -9   2  24  466.60   38.29
  -9   2  25 3056.75   80.91
  -9   2  26  436.24   39.38
  -9   2  27 1139.64   56.97
  -9   2  28 8508.90  214.17
  -9   2  29 1882.51   65.85
  -9   2  30    4.96   23.69
  -9   2  31  890.63   50.04
  -9   2  32 1348.00   47.02
  -9   2  33   24.24   23.56
  -9   2  34  121.31   23.96
  -9   3  -8 5184.78  198.32
  -9   3  -712003.86  296.75
  -9   3  -6  891.59   78.17
  -9   3  -5 9222.67  254.41
  -9   3  -423439.46  401.69
  -9   3  -3   93.79   55.68
  -9   3  -2  156.19   40.00
  -9   3  -1 6834.37  204.73
  -9   3   0 1396.02   88.45
  -9   3   1  479.59   54.44
  -9   3   2 1018.14   72.42
  -9   3   3 8583.64  194.62
  -9   3   4 3246.00  103.32
  -9   3   5 1848.35   97.60
  -9   3   617192.78  478.64
  -9   3   734029.38  590.48
  -9   3   8  240.00   57.44
  -9   3   9 4357.90  153.32
  -9   3  10 3907.32  142.77
  -9   3  1124137.74  339.26
  -9   3  1213761.45  271.24
  -9   3  13 3747.00  122.43
  -9   3  14  219.63   51.94
  -9   3  15 5336.83  177.79
  -9   3  16   28.97   33.72
  -9   3  17 2379.77   89.78
  -9   3  18 6567.69  168.19
  -9   3  19  709.10   64.67
  -9   3  20 3491.30  120.80
  -9   3  21 2194.61   91.07
  -9   3  22 8378.19  240.97
  -9   3  23 5924.32  140.84
  -9   3  24 2749.09   85.68
  -9   3  25 1012.32   51.64
  -9   3  26  301.94   38.62
  -9   3  27 1533.16   64.01
  -9   3  28 1466.36   71.78
  -9   3  29 3435.02  134.44
  -9   3  30 1469.00   53.77
  -9   3  31   10.95   18.25
  -9   3  32  231.40   24.80
  -9   3  33  204.42   24.41
  -9   3  34  277.12   28.52
  -9   4  -8 4171.34  173.20
  -9   4  -7 6744.78  230.97
  -9   4  -6 3227.24  141.19
  -9   4  -5 1313.36   91.26
  -9   4  -4 9642.20  239.53
  -9   4  -315053.12  297.45
  -9   4  -2 6993.71  198.70
  -9   4  -1 1423.89   88.12
  -9   4   0  480.45   56.54
  -9   4   1  144.64   33.33
  -9   4   2 1728.67   93.46
  -9   4   3  200.68   37.27
  -9   4   4 5315.05  147.59
  -9   4   5 3286.10  130.57
  -9   4   6    9.57   43.08
  -9   4   7  483.23   58.02
  -9   4   817669.06  330.59
  -9   4   9   53.48   74.80
  -9   4  10 5473.59  154.56
  -9   4  11 9784.53  196.40
  -9   4  12 1692.19   73.41
  -9   4  13  189.41   40.86
  -9   4  14 4935.85  153.43
  -9   4  15  505.67   51.87
  -9   4  16  955.34   71.50
  -9   4  17    2.09   32.34
  -9   4  18  626.60   53.35
  -9   4  1910065.47  192.66
  -9   4  20  527.58   55.81
  -9   4  21 3537.06  124.48
  -9   4  22 6049.18  144.42
  -9   4  23 4576.19  135.44
  -9   4  24  132.37   38.26
  -9   4  25 2367.10   85.37
  -9   4  26 6234.98  162.79
  -9   4  27   35.61   23.03
  -9   4  28   48.11   22.36
  -9   4  29   22.87   19.61
  -9   4  30  793.02   42.99
  -9   4  31   20.71   22.33
  -9   4  32   60.56   16.56
  -9   4  33  201.97   19.56
  -9   4  34   39.58   20.72
  -9   5  -8  261.64   55.05
  -9   5  -7 2406.35  132.40
  -9   5  -6 2830.09  159.56
  -9   5  -5 5329.32  181.66
  -9   5  -4    2.07   44.53
  -9   5  -3 5327.70  216.49
  -9   5  -2 1182.61  116.77
  -9   5  -1   12.46   39.65
  -9   5   0  601.41   55.79
  -9   5   1   54.39   34.72
  -9   5   2 1099.71   84.53
  -9   5   3 1097.78   66.24
  -9   5   4   85.58   34.60
  -9   5   5 6998.59  180.88
  -9   5   6  107.58   42.81
  -9   5   7  116.61   33.54
  -9   5   8    6.51   32.81
  -9   5   9  406.59   55.14
  -9   5  10  646.21   71.82
  -9   5  11 1796.90   77.93
  -9   5  12  429.72   48.69
  -9   5  1316455.29  273.01
  -9   5  14 1333.13   82.99
  -9   5  15   40.09   36.08
  -9   5  16  940.67   70.84
  -9   5  17   29.51   35.08
  -9   5  18 1177.36   79.28
  -9   5  19    7.63   35.53
  -9   5  20  414.23   54.13
  -9   5  21 9296.84  200.76
  -9   5  22 2910.37  112.64
  -9   5  23  222.13   37.77
  -9   5  24 2106.58   95.89
  -9   5  25 3385.43  111.73
  -9   5  26  353.85   32.38
  -9   5  27    0.71   24.76
  -9   5  28  196.40   26.46
  -9   5  29  129.78   22.19
  -9   5  30   11.58   17.33
  -9   5  31   38.07   17.00
  -9   5  32  157.73   17.76
  -9   5  33  243.21   34.93
  -9   6  -8  429.60   60.67
  -9   6  -7   79.32   34.29
  -9   6  -6 1657.68   90.50
  -9   6  -5  573.97   70.87
  -9   6  -4  295.06   54.73
  -9   6  -3  753.38   83.65
  -9   6  -2  331.66   51.12
  -9   6  -1  695.52   82.89
  -9   6   0    6.08   39.91
  -9   6   1  225.46   47.21
  -9   6   2 7407.97  193.88
  -9   6   3 1123.34   66.30
  -9   6   4 3067.15  116.34
  -9   6   5 2642.93   93.41
  -9   6   6 4831.55  144.44
  -9   6   7 1462.07   96.62
  -9   6   8 1370.88   99.69
  -9   6   9 2043.27  107.03
  -9   6  1012627.11  267.74
  -9   6  11 4871.63  138.08
  -9   6  12 1371.68   70.83
  -9   6  13 3401.02  118.98
  -9   6  1410663.13  197.64
  -9   6  15 7213.29  179.92
  -9   6  16 2793.06  116.40
  -9   6  17  899.67   71.91
  -9   6  18  203.81   35.80
  -9   6  19  191.87   36.92
  -9   6  20 1099.15   77.38
  -9   6  21   79.60   40.40
  -9   6  22    2.08   38.55
  -9   6  23 1688.00   96.31
  -9   6  24  981.00   59.96
  -9   6  25  208.51   29.39
  -9   6  26  133.31   25.13
  -9   6  27  137.89   26.48
  -9   6  28   39.74   20.00
  -9   6  29   32.35   20.29
  -9   6  30  555.20   40.86
  -9   6  31  271.33   19.64
  -9   6  32 1124.40   51.94
  -9   7  -8 3347.28  124.89
  -9   7  -7   30.85   40.21
  -9   7  -6   18.51   33.26
  -9   7  -5  937.97   88.67
  -9   7  -4  255.03   57.95
  -9   7  -3  238.66   42.35
  -9   7  -2  152.59   43.99
  -9   7  -1  346.94   70.37
  -9   7   017390.22  298.31
  -9   7   1 2171.39  101.15
  -9   7   2   69.70   44.84
  -9   7   3   11.71   56.79
  -9   7   432203.40  402.13
  -9   7   5 1847.12   92.17
  -9   7   6  702.87   68.42
  -9   7   7 5570.61  171.23
  -9   7   8   22.10   49.02
  -9   7   9  533.04   72.96
  -9   7  10 1060.92   79.96
  -9   7  11 6597.03  156.40
  -9   7  1219151.43  271.12
  -9   7  13  927.43   68.35
  -9   7  1413570.64  246.75
  -9   7  15 2445.51  107.04
  -9   7  16 2975.67  121.74
  -9   7  17    3.14   36.24
  -9   7  18 2481.79  105.43
  -9   7  19  101.97   34.51
  -9   7  20   58.08   34.75
  -9   7  21   22.51   33.67
  -9   7  22  506.81   48.78
  -9   7  23   34.92   29.28
  -9   7  24    0.92   29.15
  -9   7  25    8.28   29.94
  -9   7  26  149.08   24.82
  -9   7  27  264.29   27.38
  -9   7  28   16.42   18.66
  -9   7  29  329.63   27.32
  -9   7  30    0.96   21.26
  -9   7  31   77.72   21.52
  -9   7  32   92.57   27.35
  -9   8  -8  117.11   34.30
  -9   8  -7 3275.36  118.64
  -9   8  -6 3328.98  106.77
  -9   8  -5  131.17   38.70
  -9   8  -4   54.09   43.45
  -9   8  -3 2607.67   99.82
  -9   8  -2 3148.02  113.83
  -9   8  -1 1940.83   98.97
  -9   8   0  900.17   63.40
  -9   8   112056.69  255.36
  -9   8   212249.45  296.77
  -9   8   319939.90  366.48
  -9   8   4    0.50   77.40
  -9   8   5 1418.61   99.86
  -9   8   6 8698.61  195.15
  -9   8   7 8605.78  195.96
  -9   8   8  976.41   68.31
  -9   8   9 1416.45   77.39
  -9   8  10 1310.80   84.46
  -9   8  11 7996.75  195.09
  -9   8  12 7144.24  161.18
  -9   8  13 1256.83   75.34
  -9   8  14 3708.52  126.16
  -9   8  1512993.69  233.82
  -9   8  16 3841.00  122.70
  -9   8  17  160.78   41.33
  -9   8  18  493.01   52.82
  -9   8  19 1574.27   84.42
  -9   8  20  242.83   37.28
  -9   8  21  117.85   37.01
  -9   8  22   29.19   31.18
  -9   8  23   20.25   28.36
  -9   8  24  333.51   42.60
  -9   8  25  946.41   58.54
  -9   8  26  602.84   40.89
  -9   8  27   99.28   20.55
  -9   8  28  677.09   37.72
  -9   8  29  448.14   41.71
  -9   8  30  562.25   43.00
  -9   8  31  219.60   55.85
  -9   9  -8  307.07   41.07
  -9   9  -7 1451.64   70.48
  -9   9  -6  411.38   53.77
  -9   9  -5 1249.99   69.87
  -9   9  -4   20.10   34.98
  -9   9  -3  252.85   40.71
  -9   9  -2  598.15   45.88
  -9   9  -1 3464.70  115.96
  -9   9   0    0.58   47.76
  -9   9   113086.54  265.59
  -9   9   2   60.62   61.70
  -9   9   317366.99  301.70
  -9   9   4  225.75   80.58
  -9   9   515424.33  253.90
  -9   9   6 1336.17   77.73
  -9   9   7  982.77   62.25
  -9   9   8   11.17   42.66
  -9   9   9  124.31   31.60
  -9   9  10  632.23   48.75
  -9   9  11   97.44   35.04
  -9   9  12   24.54   45.25
  -9   9  1323475.24  319.52
  -9   9  14   40.38   40.95
  -9   9  15   11.40   38.75
  -9   9  16  176.80   36.88
  -9   9  17 2547.27   95.14
  -9   9  18  614.22   51.12
  -9   9  19    2.40   34.79
  -9   9  20  651.28   50.60
  -9   9  21  272.49   32.33
  -9   9  22  177.76   30.25
  -9   9  23   28.27   25.40
  -9   9  24  488.82   36.35
  -9   9  25  939.49   45.95
  -9   9  26   48.21   23.28
  -9   9  27  914.51   40.02
  -9   9  28  321.64   28.04
  -9   9  29  604.03   39.24
  -9  10  -8  134.66   29.01
  -9  10  -7   72.97   29.96
  -9  10  -6   10.56   30.92
  -9  10  -5  182.96   38.63
  -9  10  -4  490.65   42.02
  -9  10  -3  185.13   35.60
  -9  10  -2   11.58   34.92
  -9  10  -1  219.93   35.57
  -9  10   0 1444.25   79.19
  -9  10   1 1086.39   79.54
  -9  10   2 3314.76  129.18
  -9  10   3 3014.12  108.82
  -9  10   4  162.35   37.33
  -9  10   5 1982.32   82.52
  -9  10   6 4406.66  124.33
  -9  10   7 2054.35   88.00
  -9  10   8  489.88   48.89
  -9  10   9  212.54   35.25
  -9  10  10  943.08   54.64
  -9  10  11 4597.75  125.08
  -9  10  12 1378.89   61.88
  -9  10  13  383.61   37.53
  -9  10  14  163.84   30.35
  -9  10  15 1777.50   78.95
  -9  10  16 1500.49   66.77
  -9  10  17  621.06   37.06
  -9  10  18  719.91   54.77
  -9  10  19  441.18   46.02
  -9  10  20   34.17   31.21
  -9  10  21 2543.50   80.75
  -9  10  22  365.92   38.07
  -9  10  23    0.10   25.40
  -9  10  24  285.48   30.69
  -9  10  25   20.96   29.00
  -9  10  26    0.14   19.86
  -9  10  27 1468.82   68.19
  -9  10  28  879.05   58.58
  -9  11  -8    4.71   28.23
  -9  11  -7 1397.11   65.04
  -9  11  -6 1015.23   54.79
  -9  11  -5   14.78   38.82
  -9  11  -4 9088.01  171.39
  -9  11  -3  242.79   47.90
  -9  11  -2    7.69   43.66
  -9  11  -1  696.59   59.84
  -9  11   0  958.88   67.40
  -9  11   1  164.42   41.55
  -9  11   2  242.65   43.39
  -9  11   3  164.43   35.53
  -9  11   4 4269.12  129.50
  -9  11   5  169.90   36.45
  -9  11   6   30.01   32.51
  -9  11   7    0.61   30.85
  -9  11   8   40.64   30.56
  -9  11   9    0.47   26.26
  -9  11  10   41.35   31.57
  -9  11  11    9.88   25.17
  -9  11  12 1366.65   69.63
  -9  11  13    1.59   30.71
  -9  11  14  297.89   41.23
  -9  11  15  666.74   61.09
  -9  11  16 1236.36   76.56
  -9  11  17  162.89   47.54
  -9  11  18 3279.86  108.51
  -9  11  19 1183.75   65.43
  -9  11  20 1141.34   66.70
  -9  11  21   82.51   25.47
  -9  11  22 2297.49   72.34
  -9  11  23 1013.23   53.49
  -9  11  24  158.42   30.29
  -9  11  25   35.84   23.18
  -9  11  26  136.04   52.44
  -9  12  -8  113.27   24.14
  -9  12  -7  671.90   35.84
  -9  12  -6 7300.39  146.87
  -9  12  -5 2887.82  115.97
  -9  12  -4 3029.97  103.04
  -9  12  -3 2973.69  147.64
  -9  12  -212761.37  318.48
  -9  12  -1 5487.14  149.31
  -9  12   0   50.27   49.82
  -9  12   1  802.45   55.59
  -9  12   2 1449.04   74.01
  -9  12   3    0.53   34.37
  -9  12   4    0.29   31.19
  -9  12   5  242.68   36.98
  -9  12   6 2046.79   85.94
  -9  12   7  594.15   48.87
  -9  12   8   47.14   27.94
  -9  12   9  137.21   31.12
  -9  12  10  144.88   27.01
  -9  12  11   60.99   23.77
  -9  12  12   37.42   25.69
  -9  12  13  281.05   41.71
  -9  12  14  135.14   29.87
  -9  12  15  108.50   32.64
  -9  12  16 2049.82  100.25
  -9  12  17    1.27   53.14
  -9  12  18 1395.75   84.32
  -9  12  19 3044.21  108.34
  -9  12  20 9774.60  358.73
  -9  12  21    8.97   25.26
  -9  12  22   26.40   25.77
  -9  12  23  535.57   42.95
  -9  12  24 1290.83   68.49
  -9  13  -8    8.43   24.04
  -9  13  -7  534.77   36.21
  -9  13  -6  923.58   51.10
  -9  13  -513678.53  262.19
  -9  13  -4 1181.49   81.50
  -9  13  -3 7567.88  159.69
  -9  13  -2   98.32   56.38
  -9  13  -1 8659.13  174.17
  -9  13   0 1653.86   85.85
  -9  13   1 5326.21  150.51
  -9  13   2    1.71   35.22
  -9  13   3  639.57   39.20
  -9  13   4  116.88   24.93
  -9  13   5    0.02   25.67
  -9  13   6  428.86   38.65
  -9  13   7  239.69   32.41
  -9  13   8  424.39   36.15
  -9  13   9   17.82   20.14
  -9  13  10   64.54   22.87
  -9  13  11  223.18   29.78
  -9  13  12  252.85   50.06
  -9  13  13  363.22   33.91
  -9  13  14   47.72   21.84
  -9  13  15   15.16   36.29
  -9  13  16   79.96   31.67
  -9  13  17 8136.87  165.31
  -9  13  18 1355.16   71.01
  -9  13  19  302.65   34.49
  -9  13  20   73.71   23.15
  -9  13  21 5536.26  165.42
  -9  13  22  705.07  115.15
  -9  14  -8    4.11   22.07
  -9  14  -7 2458.63   83.53
  -9  14  -6  627.01   37.84
  -9  14  -5  601.99   42.53
  -9  14  -4   93.58   49.70
  -9  14  -310843.45  220.75
  -9  14  -2 3929.49  151.35
  -9  14  -1 3140.75   89.76
  -9  14   0   42.19   42.27
  -9  14   1 1059.12   51.09
  -9  14   2  569.15   40.01
  -9  14   3  811.08   42.58
  -9  14   4  316.01   28.17
  -9  14   5   62.16   19.19
  -9  14   6  387.10   27.92
  -9  14   7    3.85   19.21
  -9  14   8 1181.25   78.59
  -9  14   9   18.93   20.62
  -9  14  10  128.14   20.27
  -9  14  11    0.23   23.59
  -9  14  12   14.87   17.31
  -9  14  13    7.18   22.99
  -9  14  14   89.81   28.55
  -9  14  15 1790.21   99.03
  -9  14  16  674.31   52.72
  -9  14  17   61.76   27.86
  -9  14  18   37.13   24.04
  -9  14  19 5339.19  131.65
  -9  15  -8   26.35   30.20
  -9  15  -7   46.17   21.92
  -9  15  -6   68.99   24.49
  -9  15  -5  180.55   29.80
  -9  15  -4 2673.47  134.44
  -9  15  -3   30.37   22.83
  -9  15  -2    1.77   20.40
  -9  15  -1  758.83   39.84
  -9  15   0 2293.62   99.72
  -9  15   1    2.23   33.22
  -9  15   2    0.91   23.83
  -9  15   3   88.90   20.02
  -9  15   4    7.24   13.14
  -9  15   5    0.54   19.61
  -9  15   6  730.08   40.80
  -9  15   7  302.29   29.81
  -9  15   8   54.67   15.64
  -9  15   9    2.63   15.45
  -9  15  10  180.99   36.62
  -9  15  11  266.58   28.32
  -9  15  12  240.02   28.66
  -9  15  13  120.14   27.12
  -9  15  14   23.00   28.50
  -9  15  15  403.65   38.66
  -9  15  16  152.31   43.18
  -9  16  -2  194.95   55.93
  -9  16  -1  169.26   29.28
  -9  16   0    9.62   20.63
  -9  16   1   13.75   12.67
  -9  16   2  206.73   31.65
  -9  16   3    0.55   13.81
  -9  16   4   45.15   20.67
  -9  16   5    0.23   18.01
  -9  16   6  601.20  195.74
  -9  16   7    2.49   18.21
  -9  16   8  339.34   43.86
  -9  16   9   42.46   24.63
  -9  16  10   47.19   26.30
  -8   0  -6 2090.07  136.74
  -8   0  -4  252.87  128.11
  -8   0   0 1798.56  504.04
  -8   0   2  574.98  180.60
  -8   0   4 5359.38  739.99
  -8   0   629381.39 2034.18
  -8   0   813317.12 1456.49
  -8   0  10   14.56  228.31
  -8   0  12 3516.13  691.27
  -8   0  14   27.93  206.71
  -8   0  1614909.62  452.35
  -8   0  18  167.23   97.21
  -8   0  20 2088.00  108.63
  -8   0  22  392.42   63.05
  -8   0  24  814.20   52.70
  -8   0  26  595.96   64.54
  -8   0  2812380.74  218.45
  -8   0  30 6429.26  188.32
  -8   0  32 2488.64   91.05
  -8   0  34  204.29   32.26
  -8   0  36 1058.80  120.94
  -8   1  -7   78.99   39.78
  -8   1  -6 1917.04  122.61
  -8   1  -5    1.98   46.08
  -8   1  -414507.02  344.29
  -8   1   1 3919.18  750.98
  -8   1   2 2737.35  590.95
  -8   1   316099.60 1474.98
  -8   1   4   20.42  298.34
  -8   1   512384.61 1251.16
  -8   1   640691.00 2403.19
  -8   1   7 6541.84  955.38
  -8   1   8 3302.36  438.24
  -8   1   9 9962.33  982.47
  -8   1  10 1296.96  321.03
  -8   1  11 1953.43  357.99
  -8   1  12 1320.95  357.54
  -8   1  13 8400.01  318.58
  -8   1  14 9706.08  304.38
  -8   1  15   27.13   61.46
  -8   1  16    0.45   47.10
  -8   1  17  340.31   57.69
  -8   1  18   80.62   29.03
  -8   1  19 1108.93   66.97
  -8   1  20  168.60   39.65
  -8   1  21   14.83   28.16
  -8   1  22 1519.39   52.61
  -8   1  23  410.92   41.08
  -8   1  24  701.86   43.15
  -8   1  25 3143.29   82.81
  -8   1  26 2090.82   74.45
  -8   1  27 3206.22   84.86
  -8   1  28 4023.39   93.51
  -8   1  29 1685.03   58.03
  -8   1  30 3840.55   95.19
  -8   1  31 2915.16   78.64
  -8   1  32 1031.43   47.40
  -8   1  33    1.07   21.37
  -8   1  34   15.01   20.40
  -8   1  35  554.62   36.40
  -8   1  36 1002.56   81.00
  -8   2  -7   29.44   41.70
  -8   2  -6 1345.99   90.15
  -8   2  -5 8665.27  218.23
  -8   2  -418950.66  330.13
  -8   2  -3 3517.32  179.30
  -8   2   214665.91 1316.47
  -8   2   3 9293.38 1092.82
  -8   2   443193.31 2458.32
  -8   2   510774.97 1252.51
  -8   2   611175.84 1318.56
  -8   2   725613.98 1989.51
  -8   2   810761.16  772.87
  -8   2   9   52.35  170.81
  -8   2  10 6304.98 1214.35
  -8   2  11  101.91  203.68
  -8   2  12   16.21   48.35
  -8   2  13  600.22  119.38
  -8   2  14   90.51   37.34
  -8   2  15 3263.29  107.18
  -8   2  16  167.20   37.25
  -8   2  17   73.74   35.44
  -8   2  18 2752.62   95.73
  -8   2  19 1603.39   91.67
  -8   2  20  657.51   53.31
  -8   2  21 4595.98   98.38
  -8   2  22 7142.51  145.69
  -8   2  23    6.74   30.50
  -8   2  24  186.44   32.87
  -8   2  25    4.23   28.80
  -8   2  26 3563.97   91.47
  -8   2  27 1856.89   64.85
  -8   2  28  251.86   30.37
  -8   2  29 9592.88  170.48
  -8   2  30  697.75   44.64
  -8   2  31   20.30   27.22
  -8   2  32    0.01   24.60
  -8   2  33  616.88   38.77
  -8   2  34   32.26   26.34
  -8   2  35    1.03   21.47
  -8   2  36    1.70   23.16
  -8   3  -7   44.47   33.88
  -8   3  -6   86.98   33.55
  -8   3  -5 3572.44   98.93
  -8   3  -4  104.54   41.83
  -8   3  -314368.03  311.16
  -8   3  -239027.02  434.72
  -8   3  -118154.67  587.60
  -8   3   243614.25 2966.98
  -8   3   316398.02 1144.83
  -8   3   415031.78 1081.54
  -8   3   516455.22 1135.47
  -8   3   6 1967.00  465.48
  -8   3   714763.43  904.27
  -8   3   825488.47 1151.33
  -8   3   916357.11 1050.34
  -8   3  10 1046.51  126.09
  -8   3  11    8.04   58.48
  -8   3  12   37.49   50.03
  -8   3  13 2237.83  109.99
  -8   3  14 1841.43   69.00
  -8   3  15 2065.89   89.52
  -8   3  16 5440.32  144.30
  -8   3  17 3518.60  105.74
  -8   3  18 2373.26  105.38
  -8   3  19 1129.52   71.57
  -8   3  20 7524.77  149.01
  -8   3  21 9115.83  178.62
  -8   3  22 2223.21   79.83
  -8   3  23 2876.62  100.75
  -8   3  24 5741.82  122.87
  -8   3  25 2237.63   83.01
  -8   3  26  418.33   43.14
  -8   3  27 1536.78   58.57
  -8   3  28   22.15   27.36
  -8   3  29    6.94   26.56
  -8   3  30 1523.13   68.41
  -8   3  31 3538.16   99.98
  -8   3  32  565.27   38.97
  -8   3  33    4.60   21.19
  -8   3  34   88.92   20.58
  -8   3  35   58.60   18.52
  -8   3  36   12.01   33.44
  -8   4  -7  380.11   77.59
  -8   4  -6 4458.12  152.95
  -8   4  -5  798.51   69.05
  -8   4  -4 1077.64   89.98
  -8   4  -3  607.25   57.52
  -8   4  -215048.34  276.01
  -8   4  -1 2504.77  116.90
  -8   4   0 6361.69  190.95
  -8   4   118394.14  350.10
  -8   4   2  489.15   96.83
  -8   4   3  451.01  196.94
  -8   4   4 1636.49  162.89
  -8   4   528471.09  897.15
  -8   4   6 5715.38  410.19
  -8   4   7 4887.85  323.96
  -8   4   8 4794.28  206.21
  -8   4   9 4308.43  154.71
  -8   4  10    0.77   43.52
  -8   4  11 1629.54  109.38
  -8   4  12  605.46   38.17
  -8   4  13 8602.95  207.71
  -8   4  14 1079.28   69.19
  -8   4  15   30.22   36.67
  -8   4  16  871.20   52.23
  -8   4  17 3054.97  122.23
  -8   4  18   78.76   34.68
  -8   4  19 8135.41  159.79
  -8   4  2018386.75  259.44
  -8   4  21   44.10   41.56
  -8   4  22 2251.87   99.72
  -8   4  23 6818.01  157.24
  -8   4  24 7737.09  186.91
  -8   4  25   40.74   37.26
  -8   4  26  125.01   36.72
  -8   4  27  358.25   34.61
  -8   4  28  446.89   38.31
  -8   4  29  354.56   36.30
  -8   4  30 1511.23   72.24
  -8   4  31  927.16   52.05
  -8   4  32  507.39   37.85
  -8   4  33   83.15   19.63
  -8   4  34   69.98   17.60
  -8   4  35  998.31   50.44
  -8   5  -7  784.46   70.24
  -8   5  -6  201.49   54.06
  -8   5  -5  314.13   39.19
  -8   5  -412500.88  250.36
  -8   5  -3 1664.09  105.67
  -8   5  -2  387.86   46.50
  -8   5  -1  105.89   37.45
  -8   5   0 4216.04  144.07
  -8   5   1 4747.50  157.81
  -8   5   2   35.07   38.53
  -8   5   3  344.22   61.27
  -8   5   4  911.16   81.21
  -8   5   5 1183.33  100.29
  -8   5   6  525.64   73.01
  -8   5   7    3.32   77.11
  -8   5   8  368.88   40.45
  -8   5   9   67.62   32.85
  -8   5  10   38.22   32.21
  -8   5  11 1420.18   67.53
  -8   5  12  453.77   50.41
  -8   5  13 3477.45  122.89
  -8   5  14 2157.63   88.65
  -8   5  15 6011.37  142.19
  -8   5  16 1456.69   86.98
  -8   5  17 1995.40   86.69
  -8   5  18 6543.03  147.28
  -8   5  19 6569.92  149.37
  -8   5  20 1200.23   72.96
  -8   5  21  442.22   52.09
  -8   5  2220857.33  512.57
  -8   5  23 1754.35  106.90
  -8   5  24  196.21   50.05
  -8   5  25  237.58   45.34
  -8   5  26 2563.07  101.01
  -8   5  27   70.86   31.83
  -8   5  28  103.21   29.50
  -8   5  29 2331.10   88.00
  -8   5  30 1027.19   54.61
  -8   5  31  190.49   28.68
  -8   5  32    0.57   22.88
  -8   5  33 2046.68   99.47
  -8   5  34  195.60   24.05
  -8   5  35   47.66   16.51
  -8   6  -7 3855.97  142.33
  -8   6  -6  496.89   52.39
  -8   6  -5   56.02   35.52
  -8   6  -4 1877.21   82.31
  -8   6  -3  867.77   75.45
  -8   6  -2  105.58   43.65
  -8   6  -1  800.28   65.13
  -8   6   0 4430.88  167.56
  -8   6   1  119.55   41.60
  -8   6   2    3.61   38.93
  -8   6   3   27.70   38.63
  -8   6   4  451.61   43.05
  -8   6   5 5477.23  173.97
  -8   6   6 3845.04  144.76
  -8   6   7 1566.76   81.34
  -8   6   8 2752.08  139.11
  -8   6   9 1856.32   96.06
  -8   6  10 4826.60  124.90
  -8   6  1115277.49  261.39
  -8   6  1216116.22  262.51
  -8   6  13  665.70   63.55
  -8   6  14 1001.72   51.50
  -8   6  1512620.57  239.45
  -8   6  16 2030.28   88.78
  -8   6  17  404.18   41.20
  -8   6  18  686.40   53.45
  -8   6  19 1341.55   78.54
  -8   6  20 3949.48  159.37
  -8   6  21 8010.43  268.16
  -8   6  22    2.66   50.00
  -8   6  23 7324.26  199.24
  -8   6  24 2329.66  108.20
  -8   6  25 4671.35  163.60
  -8   6  26 1942.84   98.71
  -8   6  27 2711.53  100.64
  -8   6  28  254.04   35.58
  -8   6  29   28.17   26.22
  -8   6  30 2013.21  102.30
  -8   6  31  876.95   49.40
  -8   6  32 1352.53   57.33
  -8   6  33    0.15   15.97
  -8   6  34  724.07   39.22
  -8   7  -710428.16  266.76
  -8   7  -6 1898.82  113.64
  -8   7  -5 1772.05   89.76
  -8   7  -4  684.51   59.36
  -8   7  -3  948.23   91.99
  -8   7  -2 1909.56  106.03
  -8   7  -1  207.47   42.91
  -8   7   0 1037.41   80.04
  -8   7   1 2157.16  140.27
  -8   7   2 2700.48  120.52
  -8   7   3 1347.39   98.28
  -8   7   4  920.60   62.51
  -8   7   5 2316.53  106.23
  -8   7   6 2255.59  105.40
  -8   7   7   56.62   43.43
  -8   7   8 8018.08  205.89
  -8   7   9 9889.06  229.18
  -8   7  10 2088.18   88.06
  -8   7  11 1628.11   72.87
  -8   7  12 6684.36  183.84
  -8   7  1340548.90  422.65
  -8   7  14 1074.36   78.45
  -8   7  1519867.25  299.32
  -8   7  16   25.39   49.56
  -8   7  17 6179.34  168.08
  -8   7  18   61.52   49.88
  -8   7  19   96.72   41.46
  -8   7  20  825.83   70.06
  -8   7  21 2547.79  124.64
  -8   7  22    3.92   41.45
  -8   7  23 7218.76  169.06
  -8   7  24  843.23   67.09
  -8   7  25 1342.31   86.40
  -8   7  26  740.51   71.10
  -8   7  27 1946.30   80.90
  -8   7  28 1585.39   62.88
  -8   7  29    3.18   24.58
  -8   7  30  882.08   45.24
  -8   7  31   56.93   19.85
  -8   7  32  569.53   32.53
  -8   7  33  170.33   27.63
  -8   8  -7 6268.20  170.14
  -8   8  -617699.82  291.72
  -8   8  -5 2994.81  120.92
  -8   8  -4  476.81   61.26
  -8   8  -3  753.23   64.23
  -8   8  -2  994.45   83.76
  -8   8  -1  229.63   38.15
  -8   8   0  707.52   82.90
  -8   8   1 2887.19  124.30
  -8   8   2 1751.91  101.01
  -8   8   3  637.71   50.78
  -8   8   4 3358.21  127.22
  -8   8   5  879.53   42.34
  -8   8   6  201.20   48.49
  -8   8   7  421.30   82.52
  -8   8   8  454.48   62.21
  -8   8   9 1761.29  100.24
  -8   8  10 6091.93  157.43
  -8   8  1117112.27  283.58
  -8   8  1231847.11  360.54
  -8   8  13 4408.51  170.34
  -8   8  14 2166.60   89.16
  -8   8  1520271.52  409.39
  -8   8  1616157.46  276.11
  -8   8  17 1056.96   80.10
  -8   8  18 1744.04  105.06
  -8   8  19  800.53   79.46
  -8   8  20   80.76   41.68
  -8   8  21 1465.70   84.20
  -8   8  22  107.17   39.39
  -8   8  23   24.35   34.71
  -8   8  24 1852.15   82.61
  -8   8  25 1393.99   69.91
  -8   8  26    3.90   31.84
  -8   8  27   60.54   27.67
  -8   8  28  180.91   23.26
  -8   8  29    0.95   19.88
  -8   8  30    0.42   19.12
  -8   8  31  167.25   26.28
  -8   8  32  190.22   33.00
  -8   8  33  164.55   26.67
  -8   9  -7  984.08   66.55
  -8   9  -6  302.43   41.50
  -8   9  -5  464.62   45.87
  -8   9  -4 5236.89  166.67
  -8   9  -3  324.26   48.79
  -8   9  -2  580.35   71.70
  -8   9  -1  103.59   36.21
  -8   9   0 1123.42   69.07
  -8   9   1  246.46   45.09
  -8   9   2 3187.75  139.97
  -8   9   3    1.46   51.04
  -8   9   4 7111.89  194.23
  -8   9   5   58.13   44.50
  -8   9   6 1085.17   89.18
  -8   9   7   21.17   38.70
  -8   9   8 2127.64   92.76
  -8   9   9   26.44   52.97
  -8   9  10 5730.97  184.24
  -8   9  11  793.75   82.43
  -8   9  12 4919.34  151.60
  -8   9  13  379.03   80.31
  -8   9  1441616.75  468.27
  -8   9  15 1964.96  131.64
  -8   9  16  190.05   51.65
  -8   9  17  740.15   63.56
  -8   9  18 4153.48  135.11
  -8   9  19 1272.70   79.93
  -8   9  20    0.57   41.90
  -8   9  21  808.76   59.46
  -8   9  22  546.13   49.96
  -8   9  23   39.22   30.82
  -8   9  24  687.09   49.92
  -8   9  25   42.67   27.87
  -8   9  26   69.96   29.01
  -8   9  27    1.17   24.28
  -8   9  28   51.70   23.50
  -8   9  29  498.82   36.36
  -8   9  30  163.49   27.23
  -8   9  31   18.04   30.19
  -8   9  32   13.01   33.29
  -8  10  -7  199.84   38.75
  -8  10  -6 2056.65   97.18
  -8  10  -5  866.82   69.39
  -8  10  -4  601.51   50.38
  -8  10  -3   34.76   37.17
  -8  10  -2   28.03   34.69
  -8  10  -1  153.54   48.56
  -8  10   0  198.31   52.64
  -8  10   1 1395.84  101.33
  -8  10   2  524.83   84.23
  -8  10   3 1904.45  123.21
  -8  10   4 1275.63   86.34
  -8  10   5    4.11   41.53
  -8  10   6  263.13   54.94
  -8  10   7 3016.15  115.52
  -8  10   8 2630.14  101.55
  -8  10   9  859.86   73.72
  -8  10  10 1104.76   85.93
  -8  10  11 2287.12  107.78
  -8  10  12 4589.48  125.90
  -8  10  13 5248.18  138.39
  -8  10  14 6107.27  154.36
  -8  10  15 1499.62   78.69
  -8  10  16 1575.63   70.70
  -8  10  17 2646.31  100.14
  -8  10  18 1882.58   88.86
  -8  10  19  682.90   62.62
  -8  10  20  240.34   43.13
  -8  10  21  288.38   46.37
  -8  10  22  814.31   51.69
  -8  10  23   23.00   29.80
  -8  10  24  282.37   35.95
  -8  10  25   60.77   25.53
  -8  10  26  223.01   33.00
  -8  10  27 1332.99   57.19
  -8  10  28  217.52   30.20
  -8  10  29  239.72   27.04
  -8  10  30  901.09   71.17
  -8  11  -7  110.25   37.07
  -8  11  -6  512.52   41.69
  -8  11  -5 2797.35  117.76
  -8  11  -4   24.78   42.39
  -8  11  -3 5663.91  157.25
  -8  11  -2  459.10   56.88
  -8  11  -1  101.31   43.41
  -8  11   0  276.65   51.38
  -8  11   1  132.02   44.22
  -8  11   2   12.26   39.68
  -8  11   3  596.11   62.64
  -8  11   4    9.52   50.41
  -8  11   510644.16  250.06
  -8  11   6  122.71   50.01
  -8  11   7    7.08   42.80
  -8  11   8  322.91   46.41
  -8  11   9 1520.10   83.40
  -8  11  10 1094.89   85.78
  -8  11  11  276.77   45.59
  -8  11  12 2105.67   91.70
  -8  11  13 1176.82   63.39
  -8  11  14  288.36   33.09
  -8  11  15  616.56   47.34
  -8  11  16 5002.04  147.71
  -8  11  17   70.05   30.75
  -8  11  18  192.98   33.19
  -8  11  19 1332.03   65.49
  -8  11  20 1023.79   62.83
  -8  11  21  864.44   54.91
  -8  11  22  193.35   35.24
  -8  11  23 1326.23   73.58
  -8  11  24   74.66   31.79
  -8  11  25  192.23   31.61
  -8  11  26   55.39   30.65
  -8  11  27  242.65   38.45
  -8  11  28 1516.41   80.18
  -8  11  29  229.50   40.95
  -8  12  -7 1151.21   61.89
  -8  12  -6 1791.24   77.87
  -8  12  -5 9237.67  183.30
  -8  12  -4  145.38   38.27
  -8  12  -3 4084.48  131.56
  -8  12  -2 3055.13  113.98
  -8  12  -1 5688.91  165.08
  -8  12   0  766.71   70.62
  -8  12   1  358.94   52.55
  -8  12   2  235.22   50.29
  -8  12   3 1245.06   78.23
  -8  12   4 2068.38  112.17
  -8  12   5   82.77   46.55
  -8  12   6 1170.13   84.44
  -8  12   713670.03  241.03
  -8  12   8 2368.34  100.88
  -8  12   9  626.45   65.69
  -8  12  10 1570.22   78.78
  -8  12  11  646.36   65.08
  -8  12  12    3.92   32.34
  -8  12  13 1551.00   72.51
  -8  12  14 1632.06   78.17
  -8  12  15    3.07   27.68
  -8  12  16   45.87   26.45
  -8  12  17 1289.92   75.57
  -8  12  18  742.46   57.63
  -8  12  19  774.26   61.59
  -8  12  20 1623.02   73.15
  -8  12  21 4360.49  137.05
  -8  12  22   28.14   31.75
  -8  12  23   94.69   32.61
  -8  12  24   83.06   34.34
  -8  12  25   83.21   32.78
  -8  12  26  244.81   31.17
  -8  12  27    0.38   47.29
  -8  13  -7  166.02   30.99
  -8  13  -6    3.30   31.77
  -8  13  -5  867.72   55.20
  -8  13  -423331.95  410.11
  -8  13  -3  801.60   99.96
  -8  13  -2 1593.91   84.05
  -8  13  -1  805.72   60.18
  -8  13   0 4291.63  150.54
  -8  13   1  791.94   54.50
  -8  13   2  109.44   33.34
  -8  13   3  967.98   85.13
  -8  13   4 1640.36   93.55
  -8  13   5 2246.75  116.74
  -8  13   6 7553.65  211.91
  -8  13   7  462.13   60.88
  -8  13   8 3066.98  110.66
  -8  13   9 1663.42   83.51
  -8  13  10 7358.36  192.86
  -8  13  11  422.95   46.39
  -8  13  12  234.96   37.82
  -8  13  13   10.50   30.62
  -8  13  14  943.42   59.09
  -8  13  15  164.64   31.51
  -8  13  16  432.83   44.56
  -8  13  17    7.83   25.90
  -8  13  18 4488.83  132.35
  -8  13  19 1487.51   71.36
  -8  13  20   15.10   27.85
  -8  13  21    6.39   26.48
  -8  13  22 2463.35  101.41
  -8  13  23  360.45   47.33
  -8  13  24   12.01   30.01
  -8  13  25    6.33   42.73
  -8  14  -7  957.35   54.55
  -8  14  -6 8033.95  204.00
  -8  14  -5 1134.20   54.46
  -8  14  -4  477.00   37.76
  -8  14  -3  311.82   40.32
  -8  14  -214074.72  324.09
  -8  14  -1 4009.20  138.66
  -8  14   0 1383.66   75.31
  -8  14   1 2599.08  120.35
  -8  14   2   75.85   41.30
  -8  14   3   99.19   32.32
  -8  14   4  177.20   37.89
  -8  14   5 2048.31   84.46
  -8  14   6 6070.35  150.00
  -8  14   7  872.77   66.84
  -8  14   8 5841.64  200.08
  -8  14   9 1480.26   75.75
  -8  14  10 1291.02   65.07
  -8  14  11  706.66   51.03
  -8  14  12 1336.80   65.03
  -8  14  13   22.98   28.45
  -8  14  14   82.59   36.60
  -8  14  15   68.93   22.83
  -8  14  16  371.75   31.91
  -8  14  17   60.42   28.36
  -8  14  18   78.13   25.84
  -8  14  19  595.11   41.26
  -8  14  20 1875.46   88.07
  -8  14  21    0.10   36.78
  -8  14  22   24.38   33.15
  -8  14  23  193.76   62.92
  -8  15  -7  245.26   21.36
  -8  15  -6  248.50   21.82
  -8  15  -5 1919.69   92.00
  -8  15  -4  398.37   33.52
  -8  15  -3 5515.81  165.76
  -8  15  -2  336.25   47.44
  -8  15  -1  593.70   50.74
  -8  15   0  748.00   42.23
  -8  15   1 1248.98   58.10
  -8  15   2  145.05   32.14
  -8  15   3   79.15   25.54
  -8  15   4 1173.70   58.39
  -8  15   5 1934.89   75.05
  -8  15   6   11.93   44.35
  -8  15   7 1292.04   59.19
  -8  15   8 2855.13   89.22
  -8  15   9 4374.33  139.59
  -8  15  10   49.88   22.53
  -8  15  11  546.22   33.08
  -8  15  12  677.19   36.59
  -8  15  13    1.04   18.26
  -8  15  14  551.39   42.49
  -8  15  15   16.77   18.97
  -8  15  16  274.67   42.48
  -8  15  17  138.91   21.96
  -8  15  18   37.12   24.15
  -8  15  19   29.95   29.58
  -8  15  20    1.39   30.63
  -8  16  -7   19.62   53.19
  -8  16  -6   63.76   23.63
  -8  16  -5   78.65   35.66
  -8  16  -4   71.15   23.33
  -8  16  -3  886.05   54.54
  -8  16  -2   61.93   21.73
  -8  16  -1  917.93   67.13
  -8  16   0  475.45   29.24
  -8  16   1   48.42   15.97
  -8  16   2    3.87   19.11
  -8  16   3  533.04   35.30
  -8  16   4  231.74   22.96
  -8  16   5  139.80   19.42
  -8  16   6    0.03   20.44
  -8  16   7 1928.15   90.62
  -8  16   8  422.51   29.77
  -8  16   9  169.73   21.92
  -8  16  10  514.46   48.16
  -8  16  11    2.47   26.23
  -8  16  12  150.03   18.07
  -8  16  13  649.32   34.83
  -8  16  14  675.74   89.31
  -8  16  15  511.29   43.00
  -8  16  16   49.95   20.25
  -8  16  17  846.74  144.77
  -8  17  -4   13.05   28.48
  -8  17  -3   15.73   23.87
  -8  17  -2  352.74   76.86
  -8  17  -1 1086.12  158.99
  -8  17   0   35.08   22.25
  -8  17   1   12.45   28.66
  -8  17   2  435.39   50.97
  -8  17   3  449.03   54.59
  -8  17   4  351.75   23.92
  -8  17   5  321.02   31.21
  -8  17   6  716.50   81.40
  -8  17   7    1.57   19.94
  -8  17   8  168.22   29.05
  -8  17   9   27.99   27.98
  -8  17  10    1.77   37.74
  -8  17  11  416.45   40.00
  -7   0  -5   22.85  159.03
  -7   0  -3   10.31  162.99
  -7   0  -1 6368.12  592.22
  -7   0   9 2730.20  499.32
  -7   0  1112583.47 1145.62
  -7   0  1320131.39 1760.57
  -7   0  1516175.70 1677.35
  -7   0  1753304.76 1305.60
  -7   0  19 1367.07   92.42
  -7   0  21  233.28   49.16
  -7   0  23  528.30   65.90
  -7   0  25   28.84   45.17
  -7   0  27   31.73   44.00
  -7   0  29  134.08   45.86
  -7   0  31  321.59   50.36
  -7   0  33 1113.18   73.42
  -7   0  35 2003.14  136.29
  -7   0  37 5494.25  292.81
  -7   1  -6 7211.36  671.21
  -7   1  -5 9584.62  693.09
  -7   1  -410237.28  822.43
  -7   1  -3 9338.74  744.46
  -7   1  -225498.14  879.33
  -7   1  -1 8863.09  552.90
  -7   1   0 8136.25  708.34
  -7   1   1 1318.09  255.95
  -7   1   2  486.99  239.79
  -7   1   3 3184.17  681.41
  -7   1   413265.90 1192.18
  -7   1   5 3594.57  635.90
  -7   1   613335.22 1293.80
  -7   1   719871.46 1728.81
  -7   1   8   67.34  241.99
  -7   1   910615.80 1901.22
  -7   1  10 1103.87  219.96
  -7   1  11 3940.64  456.63
  -7   1  12  448.39  245.82
  -7   1  13 8585.45  662.61
  -7   1  1450050.20 2031.17
  -7   1  1538122.63 1659.65
  -7   1  16  915.60  299.12
  -7   1  17 1602.10  223.85
  -7   1  18 8335.59  169.36
  -7   1  19 2319.11   85.24
  -7   1  20  868.96   49.49
  -7   1  21  601.40   65.85
  -7   1  22    1.82   32.06
  -7   1  23  609.27   57.80
  -7   1  24  315.26   34.14
  -7   1  25  209.42   41.14
  -7   1  26  499.89   50.19
  -7   1  27   53.90   29.05
  -7   1  28  223.64   31.80
  -7   1  29  141.33   31.93
  -7   1  30   62.69   35.59
  -7   1  31  102.83   29.05
  -7   1  32    9.98   28.89
  -7   1  33    0.55   26.24
  -7   1  34   74.36   24.53
  -7   1  35 1616.25   61.03
  -7   1  36 2648.42  144.21
  -7   1  37 1717.25   84.02
  -7   1  38   34.85   25.77
  -7   2  -6 2036.47  428.04
  -7   2  -5   44.35  114.69
  -7   2  -4 2442.19  483.46
  -7   2  -3106632.9 2508.24
  -7   2  -2  930.49  203.42
  -7   2  -1 4394.08  485.07
  -7   2   011457.59 1055.57
  -7   2   149734.80 1638.55
  -7   2   2 2448.27  439.69
  -7   2   3 7309.31  942.90
  -7   2   417411.06 1558.39
  -7   2   517672.46 1455.08
  -7   2   612896.46 1290.41
  -7   2   7 1144.05  512.74
  -7   2   830332.95 2153.55
  -7   2   9  874.82  300.89
  -7   2  10 3557.77  434.61
  -7   2  11 5527.10  766.75
  -7   2  12 2860.94  467.02
  -7   2  1310041.60 1067.52
  -7   2  14   28.81  162.80
  -7   2  15 8230.63  689.86
  -7   2  1627226.00 1427.13
  -7   2  17 3350.06  114.26
  -7   2  18  617.42   40.57
  -7   2  19 5241.12  119.17
  -7   2  20   92.76   34.54
  -7   2  21  499.90   42.49
  -7   2  22 2361.55   98.85
  -7   2  23 4110.26  109.98
  -7   2  24  430.60   58.24
  -7   2  25   31.22   31.51
  -7   2  26   70.57   34.52
  -7   2  27  145.59   30.85
  -7   2  28  122.80   34.91
  -7   2  29    5.66   30.08
  -7   2  30 3794.98  101.99
  -7   2  31    7.31   30.40
  -7   2  32   74.04   28.95
  -7   2  33  199.61   29.58
  -7   2  34   13.55   23.44
  -7   2  35   60.29   28.12
  -7   2  36   34.68   22.59
  -7   2  37    0.01   23.44
  -7   3  -626936.59 1488.40
  -7   3  -560043.12 2030.02
  -7   3  -422842.56 1248.14
  -7   3  -3  828.48  209.22
  -7   3  -2  213.78  171.69
  -7   3  -187277.43 3287.67
  -7   3   032787.52 1361.52
  -7   3   1  122.68  176.21
  -7   3   2 1117.69  229.45
  -7   3   322896.06 1609.60
  -7   3   4   69.94  270.55
  -7   3   517061.44 1614.62
  -7   3   631190.04 1624.94
  -7   3   7 9250.40  854.43
  -7   3   8  630.91  254.58
  -7   3   9 5154.58  585.21
  -7   3  1036528.80 1808.84
  -7   3  1121116.83 1827.25
  -7   3  12 8191.49  977.86
  -7   3  1320754.23 1496.71
  -7   3  14 2472.79  637.90
  -7   3  15    0.03  171.29
  -7   3  16 8483.38  176.55
  -7   3  1720990.94  271.47
  -7   3  18  957.90   57.79
  -7   3  19 2851.20   87.68
  -7   3  20   97.62   39.76
  -7   3  21 1070.01   74.85
  -7   3  22 4433.55  118.82
  -7   3  23  923.61   68.77
  -7   3  24 1770.20   75.94
  -7   3  25   14.40   35.08
  -7   3  26  113.95   33.00
  -7   3  27  235.98   30.97
  -7   3  28 1106.96   49.63
  -7   3  29  654.68   47.52
  -7   3  30 2187.47   69.88
  -7   3  31  403.60   39.26
  -7   3  32 4072.44  107.32
  -7   3  33 1249.54   59.93
  -7   3  34  199.95   26.79
  -7   3  35  101.03   23.46
  -7   3  36   15.11   18.64
  -7   3  37   41.44   22.71
  -7   4  -612108.92 1042.26
  -7   4  -5 4765.45  596.64
  -7   4  -424201.60 1463.54
  -7   4  -3 2655.25  425.90
  -7   4  -220043.45 1358.25
  -7   4  -131085.62 1616.77
  -7   4   0  217.47  186.46
  -7   4   1 3978.34  563.86
  -7   4   222834.62 1046.63
  -7   4   3 1691.50  307.00
  -7   4   4 3796.52  461.99
  -7   4   5 1446.47  263.44
  -7   4   6  218.53  160.05
  -7   4   750127.10 1775.74
  -7   4   8 5599.79  726.92
  -7   4   943202.51 2144.85
  -7   4  1031143.19 1444.16
  -7   4  11 4030.10 1332.72
  -7   4  12 5676.10  887.08
  -7   4  13 8633.56 1128.44
  -7   4  1430158.56 1914.98
  -7   4  15 3255.38  120.27
  -7   4  16   56.43   49.35
  -7   4  17  416.13   46.74
  -7   4  18 1816.14   83.91
  -7   4  19  113.30   45.57
  -7   4  20 5429.55  158.82
  -7   4  2111207.87  265.81
  -7   4  22  203.65   41.67
  -7   4  23  208.13   46.59
  -7   4  24  139.17   44.16
  -7   4  25 3595.37   96.57
  -7   4  26  786.15   50.86
  -7   4  27  656.68   46.69
  -7   4  28 3169.66   93.60
  -7   4  29 5656.98  124.51
  -7   4  30   42.28   37.29
  -7   4  31 2605.97   92.45
  -7   4  32 2217.40   76.03
  -7   4  33 4166.48  101.02
  -7   4  34  573.75   37.37
  -7   4  35  428.04   34.07
  -7   4  36  255.50   26.96
  -7   4  37    0.51   15.77
  -7   5  -6  539.27  168.52
  -7   5  -5 1766.88  352.19
  -7   5  -4  132.10  202.33
  -7   5  -329555.66 1743.69
  -7   5  -2 7491.00  823.70
  -7   5  -1  101.86  195.72
  -7   5   0   80.44  226.50
  -7   5   122680.24 1488.33
  -7   5   2 9676.42  876.52
  -7   5   3  542.27  209.67
  -7   5   4 4022.91  687.74
  -7   5   5 7393.43  767.26
  -7   5   6 8764.28  912.53
  -7   5   7 2579.64  582.81
  -7   5   817019.64 1421.39
  -7   5   939571.59 2642.65
  -7   5  10 7026.16  789.74
  -7   5  11 5740.04  837.67
  -7   5  1219706.41 1632.43
  -7   5  13 6267.62  174.30
  -7   5  14   30.21   35.18
  -7   5  15  152.30   31.85
  -7   5  16  956.20   58.32
  -7   5  17 2605.93  106.03
  -7   5  18  225.40   48.85
  -7   5  19 7529.77  227.40
  -7   5  20   45.03   38.99
  -7   5  21  391.06   54.40
  -7   5  22 5706.49  231.89
  -7   5  2318211.24  452.52
  -7   5  24  627.26   70.22
  -7   5  25  523.83   53.42
  -7   5  26 2027.23   95.86
  -7   5  27   33.20   37.93
  -7   5  28  938.25   57.88
  -7   5  29   68.22   37.29
  -7   5  30 2453.37   89.76
  -7   5  3111372.46  238.16
  -7   5  32 1759.45   69.39
  -7   5  33  425.09   34.75
  -7   5  34  344.77   31.85
  -7   5  35 1362.19   59.79
  -7   5  36   17.71   17.07
  -7   6  -6 2032.63  127.87
  -7   6  -5  284.41   47.97
  -7   6  -4  736.21  119.71
  -7   6  -3 5101.68  732.92
  -7   6  -224264.04 1661.83
  -7   6  -1 3531.87  655.17
  -7   6   017382.42 1317.02
  -7   6   110983.92  958.91
  -7   6   2 5446.23  722.49
  -7   6   3 4803.74  541.09
  -7   6   4 6696.39  657.59
  -7   6   5 1986.05  454.73
  -7   6   6 6180.25  699.19
  -7   6   7 8675.63 1111.28
  -7   6   811001.92 1075.21
  -7   6   9  441.89  237.79
  -7   6  10 3985.03  555.40
  -7   6  11 7950.63  230.08
  -7   6  12  789.91   36.55
  -7   6  13 7699.07  256.13
  -7   6  14    7.25   36.99
  -7   6  15 1186.13   65.71
  -7   6  16  282.38   46.77
  -7   6  17  202.39   34.35
  -7   6  18 1658.92   89.22
  -7   6  19  912.69   81.18
  -7   6  2012595.45  422.69
  -7   6  21 9442.60  270.66
  -7   6  22 2562.01  105.85
  -7   6  23 3033.14  146.51
  -7   6  24 9517.03  274.70
  -7   6  25 1323.82   96.22
  -7   6  26 1354.06   77.01
  -7   6  27 5867.97  258.17
  -7   6  28  706.06   57.27
  -7   6  29 1064.48   61.67
  -7   6  30 2774.71   97.39
  -7   6  31  949.84   55.55
  -7   6  32   22.04   32.83
  -7   6  33 1671.40   71.53
  -7   6  34 2000.15   78.40
  -7   6  35    3.42   19.59
  -7   6  36    0.36   24.43
  -7   7  -6 1754.55   98.75
  -7   7  -5 8577.81  210.41
  -7   7  -4  726.03   61.06
  -7   7  -3  126.52   54.20
  -7   7  -2 8106.75  282.05
  -7   7  -1 4477.31  221.25
  -7   7   0 5883.33  244.59
  -7   7   1 4877.66  262.11
  -7   7   219916.86 1501.78
  -7   7   3 6821.93  895.39
  -7   7   4  250.12  246.43
  -7   7   5 1399.84  106.26
  -7   7   6 5618.97  263.12
  -7   7   7  934.26  147.81
  -7   7   8  885.16   70.62
  -7   7   9  639.82   41.13
  -7   7  10 3964.22  124.65
  -7   7  11   69.82   36.69
  -7   7  12  101.54   44.56
  -7   7  13  241.05   46.83
  -7   7  14 4990.04  151.79
  -7   7  15 2284.04  120.77
  -7   7  16 2305.99  117.61
  -7   7  17  529.14   52.91
  -7   7  18  225.90   41.68
  -7   7  19  482.16   55.84
  -7   7  20 2343.88  118.90
  -7   7  21 6277.64  174.32
  -7   7  2210506.50  341.24
  -7   7  23  811.72   64.45
  -7   7  2411681.77  384.29
  -7   7  25 3545.66  142.33
  -7   7  26 1291.07   90.73
  -7   7  27   92.34   40.27
  -7   7  28  728.86   55.50
  -7   7  29 1528.43   80.08
  -7   7  30  493.75   40.89
  -7   7  31   30.48   34.76
  -7   7  32 2318.80  101.15
  -7   7  33  255.79   25.87
  -7   7  34   87.33   23.49
  -7   7  35   19.26   20.14
  -7   8  -613011.59  242.08
  -7   8  -512113.86  229.84
  -7   8  -4 1838.05  108.18
  -7   8  -3  592.50   47.16
  -7   8  -2   18.20   66.01
  -7   8  -112503.34  341.75
  -7   8   0 6364.35  190.45
  -7   8   1   59.88   47.52
  -7   8   2  689.57   52.68
  -7   8   3 9422.05  249.14
  -7   8   4 4508.34  182.39
  -7   8   5  510.25   40.93
  -7   8   6  167.72   49.24
  -7   8   7 6165.91  171.36
  -7   8   8  709.53   78.07
  -7   8   9 1755.15   82.35
  -7   8  10 1039.49   41.13
  -7   8  11  228.64   36.36
  -7   8  12 8746.17  174.48
  -7   8  1326254.57  648.28
  -7   8  14  635.92   95.62
  -7   8  15 2108.04   96.90
  -7   8  1613971.11  279.80
  -7   8  17 4109.60  137.36
  -7   8  18 1051.86   69.87
  -7   8  19  985.64   69.35
  -7   8  20 1381.35   83.56
  -7   8  21 8509.44  228.25
  -7   8  22 2174.32   96.91
  -7   8  23   60.46   39.08
  -7   8  24 2742.32  107.03
  -7   8  25 7461.85  180.71
  -7   8  26 1373.23   82.63
  -7   8  27    0.65   39.29
  -7   8  28    3.31   34.14
  -7   8  29  128.34   31.15
  -7   8  30   56.36   23.36
  -7   8  31   19.83   29.57
  -7   8  32   66.02   19.33
  -7   8  33  299.84   32.25
  -7   8  34    9.11   19.85
  -7   9  -6 1607.56   77.38
  -7   9  -5  856.37   71.26
  -7   9  -4 1225.91   92.44
  -7   9  -3   70.24   46.89
  -7   9  -2  489.44   41.09
  -7   9  -1 1782.20   89.79
  -7   9   0   18.02   45.40
  -7   9   1 6515.90  169.98
  -7   9   2  135.40   53.67
  -7   9   3  248.42   74.55
  -7   9   4 2997.45  129.32
  -7   9   5  192.21   55.16
  -7   9   6  693.10   67.44
  -7   9   7  987.21  111.99
  -7   9   8 2252.68   93.76
  -7   9   9 7654.53  218.51
  -7   9  10  673.47   68.01
  -7   9  11 3231.25  104.71
  -7   9  12 3303.29   94.48
  -7   9  13 9304.79  178.82
  -7   9  14  636.53   67.75
  -7   9  1524592.48  498.12
  -7   9  16 1381.06   69.53
  -7   9  17  709.71   54.24
  -7   9  18  536.27   53.57
  -7   9  19  150.24   39.37
  -7   9  20   15.59   35.19
  -7   9  21  120.14   39.16
  -7   9  22  768.23   56.93
  -7   9  23 9363.43  224.41
  -7   9  24 1434.71   69.07
  -7   9  25  224.12   40.74
  -7   9  26 2500.52   91.55
  -7   9  27 1638.74   70.99
  -7   9  28  533.61   40.75
  -7   9  29   69.89   29.31
  -7   9  30  753.43   61.35
  -7   9  31  648.53   38.56
  -7   9  32   31.33   27.95
  -7   9  33   95.19   22.92
  -7  10  -6 2347.15   98.46
  -7  10  -5   22.92   37.58
  -7  10  -4    9.02   37.46
  -7  10  -3  162.19   38.07
  -7  10  -2   73.33   36.68
  -7  10  -1 2662.63  126.31
  -7  10   0  632.52   47.98
  -7  10   1    5.14   45.72
  -7  10   2  572.16   96.50
  -7  10   3 1111.82   80.31
  -7  10   4   52.74   47.34
  -7  10   5  960.61  104.27
  -7  10   6 1311.71   78.28
  -7  10   7    8.93   40.85
  -7  10   8  717.32   67.76
  -7  10   9 5150.71  140.47
  -7  10  10 3238.80  121.86
  -7  10  11 5977.21  157.18
  -7  10  12 5099.61  141.25
  -7  10  13 1801.55  102.96
  -7  10  14 3597.22  116.94
  -7  10  1510116.11  205.83
  -7  10  16 3647.20  126.63
  -7  10  17 1640.05   75.65
  -7  10  18    2.30   35.92
  -7  10  19   12.68   32.38
  -7  10  20   27.18   32.64
  -7  10  21  223.22   38.63
  -7  10  22 3311.17  104.39
  -7  10  23  906.39   52.46
  -7  10  24  583.82   45.26
  -7  10  25 1881.07   78.72
  -7  10  26 2744.44   94.87
  -7  10  27 2479.26   90.74
  -7  10  28 3467.82  162.58
  -7  10  29   30.82   33.15
  -7  10  30   11.08   35.35
  -7  10  31 2364.07  172.36
  -7  10  32  977.38  115.90
  -7  11  -6  442.99   52.26
  -7  11  -5   11.58   39.09
  -7  11  -4  235.71   41.50
  -7  11  -3   90.57   37.64
  -7  11  -2 1448.52   98.49
  -7  11  -1   82.23   42.81
  -7  11   0   59.05   43.38
  -7  11   1   58.07   42.60
  -7  11   2    9.94   46.00
  -7  11   3 1337.11   84.63
  -7  11   4  428.25   54.01
  -7  11   5  214.56   49.84
  -7  11   615269.39  321.83
  -7  11   7 2584.88  112.09
  -7  11   8    6.24   50.11
  -7  11   9 1552.29   97.01
  -7  11  10 4207.33  136.26
  -7  11  11 3971.44  139.93
  -7  11  12  336.12   55.72
  -7  11  13 4508.36  133.48
  -7  11  14 3493.35  113.35
  -7  11  15  206.58   40.44
  -7  11  16  916.31   60.65
  -7  11  17 1361.79   67.43
  -7  11  18 2234.48   82.33
  -7  11  19    1.81   31.20
  -7  11  20  344.59   41.57
  -7  11  21 1364.46   65.61
  -7  11  22  555.41   40.37
  -7  11  23    3.00   31.32
  -7  11  24 1420.91   72.02
  -7  11  25 6319.91  174.76
  -7  11  26   65.77   43.29
  -7  11  27  127.09   33.94
  -7  11  28   57.20   35.69
  -7  11  29 5731.34  145.74
  -7  11  30  433.51   39.50
  -7  11  31  208.33   64.45
  -7  12  -6  191.51   51.01
  -7  12  -5   59.36   36.14
  -7  12  -4 2286.40   98.36
  -7  12  -3  281.38   38.41
  -7  12  -2   38.98   35.75
  -7  12  -1  140.92   40.38
  -7  12   0  621.06   70.25
  -7  12   1   12.40   44.79
  -7  12   2 1734.99  116.94
  -7  12   3 1457.86   91.74
  -7  12   4 6308.71  174.82
  -7  12   5 1007.00   81.61
  -7  12   6  143.94   66.42
  -7  12   7 8523.55  243.85
  -7  12   829346.38  677.14
  -7  12   9  466.99   68.99
  -7  12  10 2315.34  116.49
  -7  12  11 2623.75  122.42
  -7  12  12 1043.12   71.57
  -7  12  13  367.95   52.27
  -7  12  14  803.22   67.93
  -7  12  15   85.73   38.75
  -7  12  16 1767.83   84.49
  -7  12  17  583.84   50.47
  -7  12  18   92.43   33.28
  -7  12  19   64.73   33.04
  -7  12  20   10.67   27.97
  -7  12  21  479.21   37.74
  -7  12  22  319.26   35.65
  -7  12  23  235.70   42.18
  -7  12  24  679.64   58.33
  -7  12  25   23.51   47.09
  -7  12  26   80.43   32.94
  -7  12  27 2484.96  186.23
  -7  12  28   73.54   54.81
  -7  12  29  299.60  141.45
  -7  13  -6  896.59   69.82
  -7  13  -5  374.17   41.07
  -7  13  -4  240.96   37.85
  -7  13  -3 3950.75  124.73
  -7  13  -2 1299.29   73.96
  -7  13  -1  483.79   45.05
  -7  13   0 2262.26   91.54
  -7  13   1 1355.49   90.78
  -7  13   2  393.44   47.16
  -7  13   3 1047.98   84.97
  -7  13   4  231.21   62.09
  -7  13   520938.21  345.03
  -7  13   6 4489.22  146.74
  -7  13   7 8503.86  201.38
  -7  13   8   60.65   57.18
  -7  13   910580.55  270.60
  -7  13  10 1853.48  106.63
  -7  13  11 4640.43  149.16
  -7  13  12 1544.82   92.58
  -7  13  13    0.21   39.19
  -7  13  14    2.30   35.88
  -7  13  15  707.01   60.74
  -7  13  16  222.88   41.03
  -7  13  17   87.49   32.95
  -7  13  18  542.11   45.99
  -7  13  19   12.37   31.95
  -7  13  20  529.56   51.29
  -7  13  21  271.38   35.36
  -7  13  22   27.08   39.39
  -7  13  23  661.21   54.79
  -7  13  24   10.83   41.98
  -7  13  25    0.95   39.22
  -7  13  26    0.38   44.40
  -7  13  27   89.30   31.90
  -7  13  28   24.77   57.56
  -7  14  -6 2605.04  103.65
  -7  14  -5 1406.58   87.59
  -7  14  -4 1007.37   71.76
  -7  14  -3    4.54   36.73
  -7  14  -2  668.25   62.39
  -7  14  -1  987.61   71.04
  -7  14   0    4.26   41.85
  -7  14   1  100.92   39.86
  -7  14   2 1276.13   88.39
  -7  14   3 7598.37  183.95
  -7  14   4 2802.90  120.71
  -7  14   5  881.75   70.39
  -7  14   6  241.74   63.59
  -7  14   715815.33  336.25
  -7  14   8 3883.74  165.66
  -7  14   9 5340.51  197.56
  -7  14  10   36.42   38.87
  -7  14  11  995.74   66.06
  -7  14  12  403.00   43.97
  -7  14  13   15.37   35.61
  -7  14  14  670.42   58.81
  -7  14  15  376.20   38.89
  -7  14  16  198.34   36.59
  -7  14  17 1484.09   71.16
  -7  14  18  907.93   58.35
  -7  14  19   37.53   25.90
  -7  14  20  991.67   58.98
  -7  14  21  205.70   30.15
  -7  14  22  934.32   64.92
  -7  14  23   52.48   42.57
  -7  14  24  615.89   78.39
  -7  14  25   66.88   63.56
  -7  14  26   95.09   47.51
  -7  15  -6  829.56   49.76
  -7  15  -5    0.65   31.05
  -7  15  -4 1000.48   55.47
  -7  15  -3    5.06   35.85
  -7  15  -2  575.13   45.89
  -7  15  -1 1321.39   74.68
  -7  15   0  556.50   48.20
  -7  15   1    0.02   28.50
  -7  15   2  234.79   39.77
  -7  15   3 1119.13   72.67
  -7  15   4  130.72   34.93
  -7  15   5 2438.05   97.10
  -7  15   6 5812.50  178.01
  -7  15   7   24.18   45.52
  -7  15   8  144.84   41.79
  -7  15   9 2433.84  104.68
  -7  15  10 4357.62  148.64
  -7  15  11  121.69   31.49
  -7  15  12   10.29   29.03
  -7  15  13    1.76   32.41
  -7  15  14 2226.40   90.03
  -7  15  15 1572.20   87.99
  -7  15  16 1098.91   67.62
  -7  15  17  764.75   60.28
  -7  15  18  272.26   33.58
  -7  15  19    0.00   32.71
  -7  15  20 1173.89   74.62
  -7  15  21  907.62   60.50
  -7  15  22  177.50   71.81
  -7  15  23  131.51   40.91
  -7  16  -6    2.05   24.78
  -7  16  -5  150.49   25.02
  -7  16  -4   77.02   27.52
  -7  16  -3   10.83   22.00
  -7  16  -2  608.37   46.52
  -7  16  -1    0.00   36.93
  -7  16   0  831.18   53.81
  -7  16   1   66.54   23.47
  -7  16   2    5.16   25.15
  -7  16   3   28.63   26.27
  -7  16   4  344.60   37.28
  -7  16   5 1672.56   75.91
  -7  16   6 1683.44   77.12
  -7  16   7    6.64   28.97
  -7  16   8  911.53   50.24
  -7  16   9 1116.66   65.09
  -7  16  10   23.10   23.98
  -7  16  11  777.30   59.71
  -7  16  12 1142.51   63.89
  -7  16  13   56.47   27.82
  -7  16  14  724.81   56.60
  -7  16  15   93.58   25.16
  -7  16  16 3601.92  110.56
  -7  16  17  212.66   29.29
  -7  16  18 1102.40   61.51
  -7  16  19   85.45   33.38
  -7  16  20   72.03   41.56
  -7  17  -6 1090.28   53.76
  -7  17  -5   51.73   25.47
  -7  17  -4  577.28   49.69
  -7  17  -3  244.48   32.85
  -7  17  -2   61.73   23.53
  -7  17  -1  428.01   31.78
  -7  17   0 1176.77   57.64
  -7  17   1  133.75   25.23
  -7  17   2   81.88   21.10
  -7  17   3  384.13   31.66
  -7  17   4   14.16   17.77
  -7  17   5    1.10   18.97
  -7  17   6    0.51   24.94
  -7  17   7 1051.36   64.45
  -7  17   8  840.62   66.33
  -7  17   9    2.12   23.20
  -7  17  10  140.08   27.76
  -7  17  11    1.34   23.20
  -7  17  12 1324.66   76.65
  -7  17  13 1730.55   65.50
  -7  17  14 1533.98   58.46
  -7  17  15 2093.77  102.10
  -7  17  16 1160.00   91.74
  -7  18  -4  930.87  292.23
  -7  18  -3  107.47  103.40
  -7  18  -2 1273.39  100.41
  -7  18  -1  978.26   67.75
  -7  18   0  848.76   63.40
  -7  18   1  217.26   45.83
  -7  18   2 1662.49   85.61
  -7  18   3  374.88   32.97
  -7  18   4    2.51   14.77
  -7  18   5    0.46   20.36
  -7  18   6   29.04   18.76
  -7  18   7  125.20   22.04
  -7  18   8    2.75   15.02
  -7  18   9   26.47   16.63
  -7  18  10  605.18   46.71
  -7  18  11  249.02   39.36
  -6   0  -4 4316.48  561.24
  -6   0  -2 3606.42  834.05
  -6   0   0   24.12  134.48
  -6   0   2 4840.62  612.73
  -6   0  10  971.38  233.91
  -6   0  1265365.27 2315.47
  -6   0  1437233.50 2091.43
  -6   0  1655743.51 3872.90
  -6   0  1862327.82 3989.31
  -6   0  20 1696.31  181.02
  -6   0  22 3198.36  144.17
  -6   0  24  742.05   69.24
  -6   0  2623180.15  456.43
  -6   0  28   54.21   46.89
  -6   0  3014164.24  256.72
  -6   0  32   16.27   41.54
  -6   0  34 3937.94  174.60
  -6   0  36 1286.29   92.88
  -6   0  38 4566.73  133.57
  -6   1  -5 4190.76  470.96
  -6   1  -4 1912.56  282.01
  -6   1  -316146.38  771.28
  -6   1  -2 3793.42  467.34
  -6   1  -124974.72 1007.48
  -6   1   0 6331.29  436.20
  -6   1   1  782.37  162.14
  -6   1   2  101.47  118.78
  -6   1   3  344.39   68.30
  -6   1   4    9.08  113.76
  -6   1   6 4287.31  725.66
  -6   1   710051.19 1353.76
  -6   1   8   53.39  232.43
  -6   1   9 1839.32  296.83
  -6   1  10 1319.97  165.04
  -6   1  11  670.51  252.68
  -6   1  1221981.51 1154.89
  -6   1  1310545.06  786.70
  -6   1  1434346.18 2065.86
  -6   1  1582758.35 2922.84
  -6   1  1652473.03 1997.33
  -6   1  17 2641.77  520.82
  -6   1  18 6462.24  686.70
  -6   1  19 7956.33  867.87
  -6   1  20 2743.88  130.74
  -6   1  21  714.75   51.07
  -6   1  22 1663.34   70.50
  -6   1  23 3472.33  103.90
  -6   1  24 7118.50  139.88
  -6   1  25  881.70   57.43
  -6   1  26  158.39   32.23
  -6   1  27 4079.68  109.31
  -6   1  28 6903.53  137.20
  -6   1  29 2170.81   68.27
  -6   1  30    4.72   28.64
  -6   1  31  788.18   49.92
  -6   1  32 1415.05   63.22
  -6   1  33 1197.88   56.51
  -6   1  34   56.56   40.07
  -6   1  35  271.66   30.87
  -6   1  36 1678.55   66.74
  -6   1  37 1553.83   64.04
  -6   1  38  720.92   47.33
  -6   1  39    5.38   25.64
  -6   2  -514460.43  949.27
  -6   2  -4 6028.58  670.21
  -6   2  -3 1326.84  173.19
  -6   2  -240721.68 1090.17
  -6   2  -1   65.49   75.85
  -6   2   0   82.74  156.48
  -6   2   1 5995.11  505.64
  -6   2   2 6879.34  682.89
  -6   2   3 3043.19  385.81
  -6   2   4  244.27  216.39
  -6   2   5 9044.91  569.48
  -6   2   6 1108.47  252.67
  -6   2   7 2836.69  544.82
  -6   2   820709.13 1677.60
  -6   2   925350.64 2153.17
  -6   2  1034998.50 1848.52
  -6   2  11 7458.08  969.76
  -6   2  12 8099.23 1041.67
  -6   2  1317308.71 1338.35
  -6   2  1427516.15 1958.40
  -6   2  15  586.27  268.52
  -6   2  16 4467.89  659.26
  -6   2  1761406.42 2199.70
  -6   2  18 4265.17  638.10
  -6   2  19  786.93  314.45
  -6   2  20  105.77   55.85
  -6   2  21   80.14   41.69
  -6   2  22  743.66   67.79
  -6   2  23 1102.56   62.27
  -6   2  24  154.27   35.04
  -6   2  25 6737.23  138.67
  -6   2  26   48.53   34.30
  -6   2  27 1852.80   78.47
  -6   2  28  397.71   43.28
  -6   2  29  750.80   50.47
  -6   2  30  151.03   32.00
  -6   2  31  167.82   29.64
  -6   2  32    3.74   32.37
  -6   2  33   13.52   30.70
  -6   2  34  306.12   32.09
  -6   2  35  181.26   30.20
  -6   2  36    0.16   24.06
  -6   2  37   58.52   27.39
  -6   2  38    2.21   24.71
  -6   2  39 1680.68   91.33
  -6   3  -560035.42 1999.94
  -6   3  -476136.08 2234.51
  -6   3  -3 1739.39  244.81
  -6   3  -2 2804.47  361.18
  -6   3  -1   23.54   85.72
  -6   3   013319.59  709.51
  -6   3   1 2393.68  373.35
  -6   3   2 1994.70  431.69
  -6   3   3  967.65  370.04
  -6   3   411648.22  794.09
  -6   3   528092.48 1727.65
  -6   3   614933.56  855.76
  -6   3   722874.25 1332.60
  -6   3   849250.41 1921.30
  -6   3   914975.83  908.41
  -6   3  10  122.37  146.53
  -6   3  1124777.95 1239.39
  -6   3  1232917.72 2060.07
  -6   3  1313248.83 1371.38
  -6   3  1421457.57 1622.84
  -6   3  1518037.34 1603.98
  -6   3  16    0.86  183.83
  -6   3  17 4826.26  690.91
  -6   3  18 6683.73  714.71
  -6   3  19 1866.00   88.80
  -6   3  20   92.41   36.62
  -6   3  21    6.37   52.30
  -6   3  22 2087.76   72.46
  -6   3  23  215.10   38.01
  -6   3  24   67.38   38.43
  -6   3  25 2114.20   82.94
  -6   3  26 1458.11   71.36
  -6   3  27  168.29   37.49
  -6   3  28   36.24   30.27
  -6   3  29  415.45   44.48
  -6   3  30   82.72   31.35
  -6   3  31 2856.68   95.05
  -6   3  32  468.57   40.57
  -6   3  33 3178.70  131.20
  -6   3  34  244.26   36.36
  -6   3  35    5.27   42.36
  -6   3  36   24.03   25.08
  -6   3  37    0.38   25.63
  -6   3  38   80.30   35.32
  -6   4  -5 1544.42  451.96
  -6   4  -4  370.77  254.94
  -6   4  -313924.45 1152.32
  -6   4  -2  149.19  210.14
  -6   4  -1  535.90  139.16
  -6   4   013513.89  736.88
  -6   4   1 6057.99  543.70
  -6   4   2  198.82  162.49
  -6   4   3   26.44  154.39
  -6   4   423802.44 1170.57
  -6   4   5 1713.30  433.74
  -6   4   620021.08 1086.64
  -6   4   748140.57 1812.94
  -6   4   891150.53 2939.38
  -6   4   9 1042.41  497.98
  -6   4  1044071.39 1762.24
  -6   4  1149277.07 2163.08
  -6   4  1219180.39 1652.60
  -6   4  13 1763.56  524.51
  -6   4  14 1543.56  395.90
  -6   4  15 6343.75  884.81
  -6   4  16 4334.09  833.28
  -6   4  17 1390.18  938.92
  -6   4  18 3877.49  203.65
  -6   4  19 2039.43   96.75
  -6   4  20  770.81   56.90
  -6   4  21    1.47   33.21
  -6   4  22 1142.91   61.54
  -6   4  23 3091.66  110.48
  -6   4  24  337.35   44.62
  -6   4  25 2089.82   77.18
  -6   4  26   11.38   34.28
  -6   4  27 1145.48   74.47
  -6   4  28  189.36   43.83
  -6   4  29 4235.32  127.26
  -6   4  3012412.49  260.36
  -6   4  31  205.56   38.96
  -6   4  32  848.69   50.57
  -6   4  33   73.51   39.20
  -6   4  34 8713.55  274.94
  -6   4  35  994.32   58.49
  -6   4  36  136.60   25.89
  -6   4  37  249.90   33.27
  -6   4  38    3.46   23.78
  -6   5  -5  145.86  177.59
  -6   5  -4  978.80  310.74
  -6   5  -3 5210.85  788.56
  -6   5  -225979.51 1578.31
  -6   5  -1   31.25  259.28
  -6   5   0  304.81  170.22
  -6   5   1 3526.56  449.74
  -6   5   2 3926.26  560.34
  -6   5   3  573.98  258.48
  -6   5   4 3600.32  473.82
  -6   5   511042.43 1034.62
  -6   5   636800.68 2020.31
  -6   5   734211.86 1833.07
  -6   5   8 1583.21  620.52
  -6   5   9 4501.83  695.71
  -6   5  10125376.7 3606.39
  -6   5  1114619.94 1213.12
  -6   5  1220018.19 1588.89
  -6   5  13 1507.80  426.74
  -6   5  14 6453.87  947.69
  -6   5  15  186.99  603.04
  -6   5  16  101.52  267.60
  -6   5  1710930.70  201.87
  -6   5  18  949.56   67.28
  -6   5  19  557.04   46.53
  -6   5  20  813.79   68.64
  -6   5  21 4883.79  117.05
  -6   5  22  799.51   65.29
  -6   5  23 8769.44  191.15
  -6   5  24 4944.93  142.89
  -6   5  25 3646.47  113.48
  -6   5  26 1292.69   75.39
  -6   5  27  137.54   37.26
  -6   5  28 2965.17  108.86
  -6   5  29 2097.63   99.65
  -6   5  30   33.48   40.17
  -6   5  31  310.58   48.36
  -6   5  3220038.84  522.79
  -6   5  33  990.78   60.79
  -6   5  34 1511.80   66.26
  -6   5  35  938.48   54.64
  -6   5  36 1279.22   53.68
  -6   5  37   19.94   22.86
  -6   5  38    0.26   31.42
  -6   6  -5 1460.48  458.38
  -6   6  -4 2782.13  504.41
  -6   6  -3 1049.36  333.35
  -6   6  -212015.57 1189.69
  -6   6  -158172.80 2521.25
  -6   6   021900.70 2428.65
  -6   6   122932.79 1636.15
  -6   6   215876.42 1433.65
  -6   6   312646.79 1264.27
  -6   6   4 3776.63  617.74
  -6   6   5  459.63  189.56
  -6   6   6 4338.97  728.16
  -6   6   7  716.09  330.91
  -6   6   823861.29 1623.25
  -6   6   970415.35 2874.27
  -6   6  10 4246.08  685.08
  -6   6  11 5454.28  733.88
  -6   6  12 6357.16  814.77
  -6   6  1318072.95 2220.10
  -6   6  1411367.48 1516.15
  -6   6  15 4045.72  823.40
  -6   6  16 6578.16  168.26
  -6   6  17  874.52   39.31
  -6   6  18 2202.16   73.06
  -6   6  19 2791.48   82.13
  -6   6  20 6446.40  121.00
  -6   6  2112785.03  184.11
  -6   6  22 9836.93  160.16
  -6   6  23  221.90   44.53
  -6   6  24 2506.75   85.38
  -6   6  25 4569.24  123.11
  -6   6  26  766.26   54.97
  -6   6  27  260.94   60.66
  -6   6  28 1363.93   85.97
  -6   6  29 2092.76  109.37
  -6   6  30 1747.11  100.80
  -6   6  31 7065.70  192.94
  -6   6  32  261.13   40.68
  -6   6  33 3675.07  133.10
  -6   6  34 1290.23   62.76
  -6   6  35 2038.92   81.53
  -6   6  36  645.71   41.39
  -6   6  37   94.57   27.45
  -6   7  -5 3071.93  558.37
  -6   7  -419747.80 1639.85
  -6   7  -349322.05 2432.11
  -6   7  -2 6224.00  764.42
  -6   7  -141398.19 3600.15
  -6   7   0 9318.90 1650.16
  -6   7   146262.65 3722.25
  -6   7   210662.74 1647.05
  -6   7   371356.92 4789.90
  -6   7   4 2345.91  546.35
  -6   7   5 2135.81  465.76
  -6   7   6  529.02  340.66
  -6   7   7  170.71  701.87
  -6   7   8  237.73  308.35
  -6   7   9 5077.33  594.91
  -6   7  10 1506.60  511.06
  -6   7  1122243.21 1657.09
  -6   7  12 4528.73  633.54
  -6   7  13  349.92  364.38
  -6   7  1411450.54  242.08
  -6   7  15 2870.50  128.27
  -6   7  16 4479.95  119.12
  -6   7  17  755.70   49.65
  -6   7  18 8420.80  154.35
  -6   7  19 2955.63  104.52
  -6   7  20   81.21   31.26
  -6   7  21 5042.59  121.83
  -6   7  22 3694.35  114.96
  -6   7  2313431.94  230.48
  -6   7  24  175.58   42.44
  -6   7  25 3517.69  107.92
  -6   7  26  360.71   55.43
  -6   7  27  713.46   66.41
  -6   7  28   68.19   40.93
  -6   7  29  661.85   52.47
  -6   7  30    2.83   40.35
  -6   7  31 2562.08   95.53
  -6   7  32  362.50   46.16
  -6   7  33 6351.88  228.34
  -6   7  34    5.36   27.50
  -6   7  35  208.37   31.55
  -6   7  36   87.13   28.29
  -6   8  -5 1689.50  482.73
  -6   8  -4  735.99  287.29
  -6   8  -320159.47 1665.71
  -6   8  -2 1420.50  673.76
  -6   8  -131678.90 3120.84
  -6   8   0114231.1 6103.19
  -6   8   126173.17 2938.56
  -6   8   2  284.24  327.48
  -6   8   316583.93 2220.67
  -6   8   440207.06 3471.25
  -6   8   5 6868.96  856.06
  -6   8   6 5289.38  913.26
  -6   8   7  713.92  217.48
  -6   8   8  130.99  255.04
  -6   8   9  646.84  222.25
  -6   8  10  538.56  220.48
  -6   8  11  280.09   46.65
  -6   8  12 9094.00  179.41
  -6   8  13  609.92   52.34
  -6   8  14 1417.72   58.77
  -6   8  15 6651.21  148.46
  -6   8  16  349.61   52.17
  -6   8  17  203.60   40.58
  -6   8  18    0.59   29.48
  -6   8  19 2470.24   92.03
  -6   8  20 1663.76   84.66
  -6   8  21 4456.25  126.01
  -6   8  22 5118.45  130.22
  -6   8  23  455.92   41.92
  -6   8  24    1.89   38.20
  -6   8  25 4532.24  133.69
  -6   8  26 4123.03  124.49
  -6   8  27  196.86   45.80
  -6   8  28  122.74   40.58
  -6   8  29  132.59   34.84
  -6   8  30  752.29   65.54
  -6   8  31  524.83   58.41
  -6   8  32   43.38   26.39
  -6   8  33   37.59   24.58
  -6   8  34  670.75   59.45
  -6   8  35  223.47   32.10
  -6   9  -5  175.58   48.62
  -6   9  -4 4294.80  138.26
  -6   9  -3  628.47   65.52
  -6   9  -218216.98  640.50
  -6   9  -1  235.96   69.39
  -6   9   0  604.57   86.57
  -6   9   1  430.14  103.53
  -6   9   268982.67 1362.98
  -6   9   3 1651.41  243.35
  -6   9   4 2611.52  187.79
  -6   9   5 4312.20  187.10
  -6   9   610551.58  257.39
  -6   9   7 1393.80   97.00
  -6   9   8  337.06   43.20
  -6   9   9 8337.05  198.24
  -6   9  10   18.99   41.71
  -6   9  11    3.97   37.25
  -6   9  12 4223.41   98.26
  -6   9  13 1478.26   81.69
  -6   9  14  825.76   69.13
  -6   9  15  160.24   36.36
  -6   9  16 5791.53  148.12
  -6   9  17 2260.75   87.08
  -6   9  18   58.42   34.78
  -6   9  19  131.39   29.35
  -6   9  20  121.69   33.25
  -6   9  21 5858.35  138.59
  -6   9  22  421.95   47.89
  -6   9  23  778.08   59.61
  -6   9  2410984.47  245.27
  -6   9  25 2030.22   85.36
  -6   9  26    1.89   39.47
  -6   9  27 1720.86   89.99
  -6   9  28 1069.74   64.13
  -6   9  29   39.69   31.37
  -6   9  30   45.86   28.55
  -6   9  31  106.77   41.38
  -6   9  32 1244.36   99.60
  -6   9  33    0.93   25.15
  -6   9  34  184.87   31.37
  -6  10  -5 2011.96  110.29
  -6  10  -4    1.34   39.15
  -6  10  -3 4406.67  155.28
  -6  10  -2  399.32   54.33
  -6  10  -1 4551.36  159.83
  -6  10   016003.59  275.04
  -6  10   110053.44  201.93
  -6  10   2 4256.44  152.18
  -6  10   3    5.18   46.35
  -6  10   4 1548.92   98.77
  -6  10   5  540.15   37.85
  -6  10   6 3542.80  116.04
  -6  10   7 7728.65  223.00
  -6  10   8  235.96   43.95
  -6  10   9 1113.88   62.05
  -6  10  1010885.78  243.31
  -6  10  11 2774.46  124.71
  -6  10  12    3.94   40.17
  -6  10  13 3341.54  124.65
  -6  10  14 4699.19  115.91
  -6  10  15 3299.76  107.15
  -6  10  16 1779.99   72.67
  -6  10  17 7567.48  159.34
  -6  10  18 5370.63  137.29
  -6  10  19 9238.63  167.07
  -6  10  20 4534.95  112.18
  -6  10  21   29.19   30.28
  -6  10  22  106.06   30.67
  -6  10  23 8754.94  165.47
  -6  10  24 6034.26  130.07
  -6  10  25   16.47   34.35
  -6  10  26 1378.92   67.23
  -6  10  27 1780.87   90.98
  -6  10  28 1629.45   74.99
  -6  10  29  655.70   65.60
  -6  10  30  282.24   55.25
  -6  10  31  129.52   45.51
  -6  10  32   71.73   34.81
  -6  10  33    1.05   33.43
  -6  11  -5  596.11   58.84
  -6  11  -4  103.55   45.97
  -6  11  -3  183.03   40.76
  -6  11  -2  118.59   39.82
  -6  11  -1  190.56   31.67
  -6  11   0  615.29   47.00
  -6  11   1  179.33   46.88
  -6  11   2 1622.00  107.52
  -6  11   3  192.29   49.62
  -6  11   415945.09  373.31
  -6  11   5  846.50   75.33
  -6  11   6  435.84   56.24
  -6  11   7 9020.48  197.83
  -6  11   8 6309.09  188.27
  -6  11   9 1003.32   51.68
  -6  11  10  308.42   51.49
  -6  11  11 1185.33  107.75
  -6  11  12  100.88   44.31
  -6  11  13 1353.89   81.74
  -6  11  14  122.23   37.61
  -6  11  15 8469.21  173.97
  -6  11  16 3733.12  113.72
  -6  11  17   30.48   37.15
  -6  11  18 1857.09   84.98
  -6  11  19 4713.12  133.69
  -6  11  20 1969.28   78.04
  -6  11  21  181.29   38.19
  -6  11  22 9214.94  171.28
  -6  11  23 1441.73   68.05
  -6  11  24  207.41   38.28
  -6  11  25 1347.71   75.80
  -6  11  26 7352.09  248.94
  -6  11  27  317.75   44.80
  -6  11  28   68.09   46.20
  -6  11  29   82.47   41.49
  -6  11  30 1071.55   62.96
  -6  11  31  125.77   37.23
  -6  11  32   21.45   26.04
  -6  12  -5 3742.78  129.19
  -6  12  -4 3474.04  138.55
  -6  12  -3  902.41   87.74
  -6  12  -2   58.87   43.23
  -6  12  -1    1.30   37.01
  -6  12   0  601.68   61.35
  -6  12   1 4637.34  161.98
  -6  12   2 1471.38   89.97
  -6  12   3 4441.23  150.34
  -6  12   4 3983.35  144.03
  -6  12   5 8340.97  286.02
  -6  12   6  327.16   57.29
  -6  12   7   21.95   48.71
  -6  12   8 8065.36  192.74
  -6  12   913763.44  319.27
  -6  12  10   12.38   59.24
  -6  12  11  684.34   64.84
  -6  12  12   13.94   51.17
  -6  12  13   74.73   43.40
  -6  12  14    1.82   43.61
  -6  12  15   18.20   41.19
  -6  12  16 4063.58  120.11
  -6  12  17 5371.59  132.83
  -6  12  18  193.14   43.34
  -6  12  19 4247.46  123.92
  -6  12  20 1813.73   77.65
  -6  12  21    1.59   35.07
  -6  12  22 1094.00   61.91
  -6  12  23  156.76   36.53
  -6  12  24  693.71   47.45
  -6  12  25 1244.40   68.14
  -6  12  26  174.45   50.76
  -6  12  27  112.42   54.16
  -6  12  28 1752.08   90.42
  -6  12  29   39.01   76.58
  -6  12  30   92.81   43.73
  -6  12  31  937.53  310.80
  -6  13  -5   74.11   40.96
  -6  13  -4   42.69   38.46
  -6  13  -3  196.94   39.74
  -6  13  -2 4178.34  146.09
  -6  13  -1   23.27   36.95
  -6  13   0   13.33   36.21
  -6  13   1  707.34   59.21
  -6  13   2 5159.89  224.89
  -6  13   3   99.39   51.72
  -6  13   4  171.13   44.32
  -6  13   5    2.63   50.31
  -6  13   620122.28  447.27
  -6  13   7 5472.59  165.00
  -6  13   8 3155.61  136.64
  -6  13   9   14.35   58.52
  -6  13  10 9260.98  266.84
  -6  13  11  209.54   60.67
  -6  13  12   30.52   49.89
  -6  13  13  617.87   69.85
  -6  13  14 2014.98  106.15
  -6  13  15  365.24   56.20
  -6  13  16 8789.18  210.69
  -6  13  17   40.23   43.29
  -6  13  18 1419.84   76.42
  -6  13  19  928.86   61.27
  -6  13  20  643.20   54.39
  -6  13  21  289.94   37.79
  -6  13  22  391.40   39.70
  -6  13  23   12.16   38.45
  -6  13  24 1215.55   61.66
  -6  13  25   15.61   51.04
  -6  13  26    5.02   65.01
  -6  13  27    0.35   60.02
  -6  13  28   99.36   65.42
  -6  13  29  107.49   84.65
  -6  14  -5    6.59   52.04
  -6  14  -4 5079.26  153.05
  -6  14  -3 3832.24  131.50
  -6  14  -2   99.54   43.09
  -6  14  -1    3.62   36.83
  -6  14   0 1022.59   64.24
  -6  14   1  470.73   54.29
  -6  14   2  113.39   46.28
  -6  14   3   41.59   43.29
  -6  14   4 6042.76  170.83
  -6  14   5 1305.08   80.72
  -6  14   6  235.32   53.81
  -6  14   7 1005.79   79.23
  -6  14   8 8558.76  263.58
  -6  14   9  284.57   55.43
  -6  14  10 1277.39   84.40
  -6  14  11   67.73   48.33
  -6  14  12   32.90   36.08
  -6  14  13   21.66   44.06
  -6  14  14 1808.86  105.87
  -6  14  15 1385.25   88.40
  -6  14  16 4385.05  155.86
  -6  14  17  448.08   61.20
  -6  14  18 4706.51  212.73
  -6  14  19 4275.66  145.42
  -6  14  20  600.97   52.41
  -6  14  21  487.93   46.13
  -6  14  22  183.40   46.17
  -6  14  23 1697.22   85.72
  -6  14  24    9.01   34.58
  -6  14  25  367.95   88.83
  -6  14  26 1488.32  157.04
  -6  14  27    8.69   93.90
  -6  15  -5 5822.19  203.44
  -6  15  -4 1683.37   93.88
  -6  15  -3  563.37   63.56
  -6  15  -2    3.16   35.86
  -6  15  -1  182.54   33.60
  -6  15   0 2134.83   84.44
  -6  15   1  110.10   36.41
  -6  15   2  100.38   38.12
  -6  15   3  111.56   43.58
  -6  15   4 1155.18   88.32
  -6  15   5 1071.89   78.58
  -6  15   6  822.69   60.95
  -6  15   7  645.98   55.54
  -6  15   8   98.59   38.86
  -6  15   9  102.81   38.74
  -6  15  10   42.09   34.46
  -6  15  11  105.35   40.12
  -6  15  12  111.37   43.15
  -6  15  13  192.59   46.91
  -6  15  14 1237.03   89.25
  -6  15  15 7330.92  225.05
  -6  15  16  136.34   66.18
  -6  15  17 1853.24   93.81
  -6  15  18 3040.22   99.31
  -6  15  19  825.94   60.94
  -6  15  20  221.39   38.40
  -6  15  21 2062.17   97.94
  -6  15  22 1840.91  143.03
  -6  15  23  795.54   72.69
  -6  15  24  700.93  122.08
  -6  15  25   53.36   37.42
  -6  16  -5  864.78   51.64
  -6  16  -4    0.97   31.60
  -6  16  -3  359.11   45.80
  -6  16  -2 1670.11   84.21
  -6  16  -1  206.61   39.09
  -6  16   0   27.22   32.79
  -6  16   1 2581.02  102.42
  -6  16   2 1223.47   71.81
  -6  16   3    0.02   49.81
  -6  16   4  145.78   34.13
  -6  16   5  690.55   60.13
  -6  16   6 1431.45   79.25
  -6  16   7 1064.47   76.88
  -6  16   8   17.06   39.46
  -6  16   9    1.53   33.10
  -6  16  10   25.03   32.89
  -6  16  11    5.89   36.79
  -6  16  12  264.82   41.46
  -6  16  13 3565.45  132.45
  -6  16  14  554.52   61.71
  -6  16  15    1.28   34.88
  -6  16  16    0.86   34.21
  -6  16  17 5838.79  200.89
  -6  16  18 1639.30   67.26
  -6  16  19   42.07   27.69
  -6  16  20 1111.13   65.92
  -6  16  21   32.80   26.35
  -6  16  22  125.25   45.02
  -6  16  23 1011.75  189.06
  -6  17  -5   92.30   51.64
  -6  17  -4   86.88   35.21
  -6  17  -3  474.48   43.86
  -6  17  -2 1091.57   60.89
  -6  17  -1  874.90   61.75
  -6  17   0   81.33   33.33
  -6  17   1  518.85   52.79
  -6  17   2 2048.79  104.89
  -6  17   3 1560.25   78.70
  -6  17   4    1.17   27.12
  -6  17   5  501.32   42.33
  -6  17   6  555.15   49.20
  -6  17   7  393.59   43.53
  -6  17   8  499.22   48.20
  -6  17   9 1602.61   82.92
  -6  17  10  246.60   42.62
  -6  17  11  110.84   38.30
  -6  17  12    7.86   34.62
  -6  17  13  217.07   44.30
  -6  17  14 2885.63   93.25
  -6  17  15 2203.89   78.93
  -6  17  16 1663.77   65.53
  -6  17  17   36.92   29.52
  -6  17  18   75.48   25.74
  -6  17  19   53.46   24.49
  -6  18  -5  138.20   28.02
  -6  18  -4   10.58   24.78
  -6  18  -3  460.31   43.80
  -6  18  -2  348.68   67.55
  -6  18  -1  143.67   28.60
  -6  18   0 2748.14  122.46
  -6  18   1   67.14   33.58
  -6  18   2  331.43   48.53
  -6  18   3    0.32   27.31
  -6  18   4 1379.79  109.38
  -6  18   5   99.03   37.88
  -6  18   6   12.02   31.80
  -6  18   7 1536.13   93.83
  -6  18   8   57.44   24.80
  -6  18   9   66.41   39.12
  -6  18  10    0.83   25.58
  -6  18  11 2299.06  103.00
  -6  18  12  470.07   40.05
  -6  18  13   10.12   22.40
  -6  18  14   95.76   30.39
  -6  18  15  752.23   53.96
  -6  19  -3    3.97   27.54
  -6  19  -2  593.37   68.82
  -6  19  -1 1608.66  103.41
  -6  19   0  710.81   82.34
  -6  19   1  177.24   37.43
  -6  19   2  342.19   56.02
  -6  19   3  362.38   43.82
  -6  19   4   44.81   25.48
  -6  19   5    6.09   20.96
  -6  19   6  253.16   39.14
  -6  19   7  319.00   57.78
  -6  19   8   14.92   19.23
  -6  19   9  503.82  108.45
  -5   0  -3 2201.03  468.19
  -5   0  -129426.02 1591.07
  -5   0   119713.04 1240.57
  -5   0   315526.72  446.01
  -5   0   544961.22 1352.87
  -5   0   933030.14 2244.33
  -5   0  11  798.21  450.39
  -5   0  1326078.48 1459.28
  -5   0  15 5815.69  713.14
  -5   0  17 9034.25  675.50
  -5   0  1910818.79  767.55
  -5   0  21 3437.45  572.62
  -5   0  2336646.00 1059.91
  -5   0  2513883.72  344.77
  -5   0  2764995.74 1006.48
  -5   0  29 1613.21   90.44
  -5   0  3114952.40  422.21
  -5   0  33    7.30   39.79
  -5   0  35  304.03   55.84
  -5   0  37   30.82   46.04
  -5   0  39   87.08   65.54
  -5   1  -4   20.31  122.03
  -5   1  -3 5163.79  508.38
  -5   1  -2  225.32  170.16
  -5   1  -128861.33  953.32
  -5   1   030980.75 1023.59
  -5   1   1 2073.90  162.72
  -5   1   256420.49 1511.07
  -5   1   322063.70  813.45
  -5   1   4  157.83  125.51
  -5   1   5  483.92  311.81
  -5   1   6 6865.15  664.17
  -5   1   7 6646.97 1137.98
  -5   1   8 5984.06  607.47
  -5   1   9  297.13  196.45
  -5   1  10  141.36  124.86
  -5   1  11  894.03  194.68
  -5   1  12  613.25  115.31
  -5   1  1311440.61  745.96
  -5   1  1412114.21  704.89
  -5   1  15 8570.34  482.78
  -5   1  1639383.38 1135.37
  -5   1  17 9712.08  573.71
  -5   1  18 2154.14  228.13
  -5   1  19 1131.24  235.25
  -5   1  20  588.20  165.66
  -5   1  21  344.56  176.18
  -5   1  22   58.57   93.21
  -5   1  23 7293.41  185.24
  -5   1  2426031.77  503.65
  -5   1  2525168.43  508.28
  -5   1  26 2257.35   91.55
  -5   1  27 2045.75   80.83
  -5   1  2813107.57  226.26
  -5   1  2915880.23  242.14
  -5   1  30 2197.86   74.19
  -5   1  31   20.83   28.80
  -5   1  32  446.17   41.28
  -5   1  33   46.25   28.41
  -5   1  34   18.73   27.11
  -5   1  35    7.19   28.86
  -5   1  36    2.19   26.16
  -5   1  37    9.08   29.84
  -5   1  38  114.57   29.58
  -5   1  39    1.08   25.93
  -5   1  40    5.12   30.63
  -5   2  -431738.14 1061.95
  -5   2  -3    5.01  101.24
  -5   2  -2 2188.34  363.70
  -5   2  -110759.98  498.12
  -5   2   014284.69  484.67
  -5   2   1 7432.39  649.04
  -5   2   2 4778.38  425.23
  -5   2   3 7048.40  458.24
  -5   2   4 3237.15  268.36
  -5   2   5 3510.79  189.01
  -5   2   6  250.50  119.59
  -5   2   7 1300.02  306.43
  -5   2   8  913.18  413.48
  -5   2   914929.92  832.76
  -5   2  1010125.35  452.89
  -5   2  1146776.92 1093.84
  -5   2  12  418.08  197.06
  -5   2  13 2146.84  267.73
  -5   2  1410845.08 1078.17
  -5   2  15 4797.70  403.88
  -5   2  16 2887.80  394.03
  -5   2  17  106.43  135.40
  -5   2  1846102.68 1925.02
  -5   2  19  803.03  224.86
  -5   2  20    2.58  337.41
  -5   2  21  881.01  171.26
  -5   2  22 5020.69  131.47
  -5   2  23 1509.94   59.22
  -5   2  24  606.44   46.80
  -5   2  25    4.98   32.29
  -5   2  2620801.88  368.57
  -5   2  27   42.43   34.35
  -5   2  28 2338.14   87.40
  -5   2  29   16.91   30.48
  -5   2  30 1926.91   66.78
  -5   2  31    2.37   30.73
  -5   2  32  174.59   31.09
  -5   2  33    9.83   28.70
  -5   2  34  415.87   41.93
  -5   2  35    7.03   28.28
  -5   2  36  506.86   39.38
  -5   2  37    6.52   27.72
  -5   2  38   20.48   22.21
  -5   2  39    0.99   21.84
  -5   3  -4 6741.85  598.78
  -5   3  -3   82.88  189.49
  -5   3  -211082.92  453.47
  -5   3  -114551.27  862.97
  -5   3   0 6465.00  516.60
  -5   3   121490.81  938.69
  -5   3   2   90.44  264.42
  -5   3   3   36.13  272.18
  -5   3   4    4.07  337.42
  -5   3   536841.04 2293.15
  -5   3   649174.87 2084.57
  -5   3   713800.87 1076.14
  -5   3   8  243.06  131.96
  -5   3   924182.74  948.14
  -5   3  1015315.12  930.15
  -5   3  11   67.85  152.25
  -5   3  12 9121.88  685.64
  -5   3  13 3248.42  591.21
  -5   3  14   45.77  277.19
  -5   3  15 5390.83  851.97
  -5   3  1636079.85 2040.97
  -5   3  17 8621.83  699.81
  -5   3  18 1319.22  319.06
  -5   3  19   24.53  340.71
  -5   3  20 9115.93 1197.32
  -5   3  21 1679.38  114.70
  -5   3  22  106.85   31.72
  -5   3  23 1739.84   85.03
  -5   3  24   87.68   39.95
  -5   3  25  371.10   88.23
  -5   3  26 1253.71   60.26
  -5   3  27  213.56   32.05
  -5   3  28  454.80   49.76
  -5   3  29    0.27   30.57
  -5   3  30  663.77   50.69
  -5   3  31  525.26   49.97
  -5   3  32 1120.74   55.77
  -5   3  33 1543.90   70.27
  -5   3  34 3780.79  102.34
  -5   3  35  101.99   30.57
  -5   3  36   81.57   30.52
  -5   3  37  156.39   29.43
  -5   3  38   45.21   41.87
  -5   3  39   21.94   21.68
  -5   4  -417755.36 1083.43
  -5   4  -391809.79 2674.81
  -5   4  -214721.44  888.16
  -5   4  -1  377.19  157.56
  -5   4   017805.19 1195.01
  -5   4   1 3547.73  384.24
  -5   4   244420.03 2039.24
  -5   4   3   47.96  162.11
  -5   4   4 6537.61  616.14
  -5   4   516866.99 1068.10
  -5   4   6 1142.89  264.91
  -5   4   7 5927.50  665.93
  -5   4   839347.93 1596.20
  -5   4   994420.72 2730.89
  -5   4  10  471.72  291.21
  -5   4  1112176.63  858.46
  -5   4  12   73.26  145.49
  -5   4  1315286.10 1379.54
  -5   4  14  403.81  286.26
  -5   4  1515163.00 1369.82
  -5   4  1614324.30 1249.64
  -5   4  1720407.52 1554.29
  -5   4  18 5290.92  666.26
  -5   4  1918582.43 1242.33
  -5   4  20 7899.97  814.94
  -5   4  21 3191.48  101.07
  -5   4  22 1586.93   74.34
  -5   4  23  359.96   34.38
  -5   4  24 3041.76  101.42
  -5   4  25   29.82   31.31
  -5   4  26   44.41   32.64
  -5   4  27  314.92   31.66
  -5   4  28  229.66   34.46
  -5   4  29   74.68   31.29
  -5   4  30    0.20   32.23
  -5   4  3110271.10  240.43
  -5   4  32 3613.92  104.90
  -5   4  33  358.90   37.27
  -5   4  34  179.81   34.85
  -5   4  35 4938.61  146.02
  -5   4  36 1103.05   61.43
  -5   4  37   68.78   29.79
  -5   4  38  118.28   25.47
  -5   4  39  988.17   72.23
  -5   5  -431864.83 1693.67
  -5   5  -322996.40 1993.44
  -5   5  -2 6402.95  542.35
  -5   5  -1  418.30  228.37
  -5   5   034586.79 1273.36
  -5   5   1 5259.64  818.26
  -5   5   2 5210.01  560.34
  -5   5   3 3394.50  437.50
  -5   5   420141.35 1225.02
  -5   5   5 5887.49  766.97
  -5   5   6    2.06  151.35
  -5   5   760679.46 2017.16
  -5   5   810314.46  953.86
  -5   5   9 8539.21  902.35
  -5   5  1046516.92 1611.87
  -5   5  11103069.2 2416.09
  -5   5  12  260.25  221.37
  -5   5  1316120.91  978.31
  -5   5  1415422.89 1385.29
  -5   5  15 1732.61  466.70
  -5   5  16 1009.26  371.75
  -5   5  17 1775.24  432.62
  -5   5  1822292.97 1713.55
  -5   5  1929958.75 1512.54
  -5   5  20 1646.86   70.83
  -5   5  21 1319.67   69.59
  -5   5  22 7287.82  144.88
  -5   5  23  971.86   63.64
  -5   5  24    7.86   28.65
  -5   5  25    0.27   30.90
  -5   5  26  404.35   34.74
  -5   5  27    0.96   30.24
  -5   5  28 3341.80   95.16
  -5   5  29 4939.88  132.43
  -5   5  30 1366.94   66.38
  -5   5  31    7.89   37.44
  -5   5  32 3718.12  128.06
  -5   5  3311171.15  349.97
  -5   5  34  169.73   36.73
  -5   5  35  505.51   43.77
  -5   5  36 1046.93   56.05
  -5   5  37    0.82   24.21
  -5   5  38  205.49   34.66
  -5   6  -4  237.56  334.99
  -5   6  -3 4808.61 1106.69
  -5   6  -2 3654.93  964.34
  -5   6  -111316.87  761.35
  -5   6   032599.91 1485.79
  -5   6   116614.51 1491.50
  -5   6   2  725.60  310.92
  -5   6   3 1575.15  273.91
  -5   6   4   86.32  139.35
  -5   6   5  611.57  339.55
  -5   6   6 4294.37  566.94
  -5   6   7 3733.83  609.95
  -5   6   855980.13 2169.38
  -5   6   938314.08 1650.47
  -5   6  1076430.74 2218.27
  -5   6  1139152.71 1464.25
  -5   6  1253730.63 1828.86
  -5   6  13  569.10  283.73
  -5   6  14 7149.17  945.52
  -5   6  1548728.22 2420.95
  -5   6  16 6206.58  920.66
  -5   6  1714847.79 1420.17
  -5   6  1810339.51 1107.74
  -5   6  19 2420.78   83.59
  -5   6  20 3442.82   98.66
  -5   6  21 2171.53   76.23
  -5   6  22  141.25   28.28
  -5   6  23    5.83   24.21
  -5   6  24    2.63   27.77
  -5   6  25  443.26   40.70
  -5   6  26   82.96   32.21
  -5   6  27   12.20   31.21
  -5   6  28  365.06   43.50
  -5   6  29   16.18   34.65
  -5   6  30 5177.29  142.87
  -5   6  31 1460.35   70.61
  -5   6  32 1119.67   89.58
  -5   6  33 2160.15  130.09
  -5   6  34 3602.52  125.70
  -5   6  35  292.18   39.09
  -5   6  36   96.31   24.69
  -5   6  37 1421.63   66.80
  -5   6  38    4.31   20.41
  -5   7  -4 5082.99 1178.85
  -5   7  -3 9074.54 1520.25
  -5   7  -290555.17 4584.16
  -5   7  -1 4210.62 1091.56
  -5   7   016750.45 1635.53
  -5   7   1  694.78  267.59
  -5   7   237119.12 1665.25
  -5   7   3 7003.29  681.33
  -5   7   422533.53 1370.17
  -5   7   5 2221.58  460.73
  -5   7   6 2405.45  407.60
  -5   7   7 8460.29  988.93
  -5   7   859941.46 2380.77
  -5   7   918704.80 1229.30
  -5   7  1022570.32 1235.80
  -5   7  1113595.01  969.46
  -5   7  12125624.1 2898.31
  -5   7  1327257.77 1377.41
  -5   7  14  647.04  284.49
  -5   7  15 8774.18 1114.95
  -5   7  16  116.80  739.72
  -5   7  1713334.59  300.32
  -5   7  18  121.91   25.02
  -5   7  19  657.70   44.97
  -5   7  20 3673.63   89.11
  -5   7  21   47.51   24.60
  -5   7  22 1296.76   68.48
  -5   7  23   32.03   28.59
  -5   7  24 5011.03  116.43
  -5   7  25  116.23   31.62
  -5   7  26 1090.66   69.56
  -5   7  27   42.77   33.27
  -5   7  28  192.39   35.03
  -5   7  29  272.02   40.35
  -5   7  30  842.02   64.77
  -5   7  31  768.45   68.97
  -5   7  32 1967.14  108.53
  -5   7  33  523.28   59.87
  -5   7  34 3161.91  143.98
  -5   7  35  716.41   44.33
  -5   7  36   65.22   23.43
  -5   7  37   10.00   25.18
  -5   8  -4 2443.84  603.08
  -5   8  -319968.47 2186.44
  -5   8  -2 8569.41 1415.00
  -5   8  -1 1315.81  567.58
  -5   8   074323.35 3925.38
  -5   8   1132255.0 5249.91
  -5   8   2 7771.24 1342.38
  -5   8   3  252.33  263.56
  -5   8   428027.97 2521.42
  -5   8   5 5495.30 1120.07
  -5   8   6 2359.45  479.61
  -5   8   7 2548.61  473.85
  -5   8   8  667.62  262.66
  -5   8   927077.88 1375.36
  -5   8  1038550.85 1644.09
  -5   8  11  182.50  284.37
  -5   8  12 1354.68  350.03
  -5   8  1323440.09 1281.21
  -5   8  1410225.28 1129.30
  -5   8  15   43.35   53.78
  -5   8  16   47.26   25.82
  -5   8  17 2693.00  107.38
  -5   8  18 1703.36   68.17
  -5   8  19  148.12   33.59
  -5   8  20   64.65   27.48
  -5   8  21  893.77   46.94
  -5   8  22 2115.59   73.97
  -5   8  23 3526.47  110.61
  -5   8  24  667.05   47.89
  -5   8  25  416.22   39.54
  -5   8  26 3501.74  105.18
  -5   8  27 1140.01   66.94
  -5   8  28    4.88   29.92
  -5   8  29   30.85   33.32
  -5   8  30   96.17   34.71
  -5   8  31 1220.35   83.30
  -5   8  32  622.55   64.35
  -5   8  33    0.27   28.75
  -5   8  34  204.28   32.91
  -5   8  35  368.99   34.21
  -5   8  36  139.15   35.84
  -5   9  -410844.79 1679.24
  -5   9  -331233.86 2789.28
  -5   9  -2  309.46  596.81
  -5   9  -155637.62 3507.31
  -5   9   0 9229.69 1460.98
  -5   9   1 2979.03  898.05
  -5   9   2 4338.20 1096.87
  -5   9   367353.42 3922.38
  -5   9   4 2280.56  684.84
  -5   9   5 1051.56  493.12
  -5   9   6 2160.34  896.54
  -5   9   7  221.57  160.01
  -5   9   8 1523.82  552.54
  -5   9   9   49.86  277.06
  -5   9  10 1406.66  469.62
  -5   9  1122228.71 1685.06
  -5   9  12  515.80   55.45
  -5   9  13 8921.87  211.04
  -5   9  14 8751.35  179.09
  -5   9  15   38.02   30.36
  -5   9  16  613.04   28.44
  -5   9  17  878.95   55.11
  -5   9  1811447.61  181.61
  -5   9  19  669.22   36.40
  -5   9  20    9.30   25.03
  -5   9  21  262.75   29.28
  -5   9  22 2952.89   89.73
  -5   9  23 4052.57  101.88
  -5   9  24  195.09   30.09
  -5   9  25 6028.27  124.46
  -5   9  26   81.87   31.29
  -5   9  27  971.49   53.43
  -5   9  28    4.26   35.70
  -5   9  29  597.09   47.37
  -5   9  30  408.65   51.01
  -5   9  31    2.26   36.72
  -5   9  32  301.68   54.26
  -5   9  33 1016.82   66.86
  -5   9  34  376.59   33.88
  -5   9  35   90.06   28.81
  -5   9  36  587.61  159.94
  -5  10  -4 2051.67  116.05
  -5  10  -3  214.69   81.61
  -5  10  -216398.04 1905.94
  -5  10  -112360.65 1738.14
  -5  10   0 6851.77 1290.69
  -5  10   119693.64 2378.98
  -5  10   227942.24 2801.02
  -5  10   313647.47 1923.33
  -5  10   4 2350.53 1050.91
  -5  10   5  718.20  430.70
  -5  10   6  576.92  262.02
  -5  10   7 1507.55  158.91
  -5  10   8   42.65   41.02
  -5  10   9 2263.24  102.79
  -5  10  1010804.48  225.36
  -5  10  11  244.33   48.40
  -5  10  12 6623.18  158.14
  -5  10  13 6447.12  138.70
  -5  10  14  402.57   54.27
  -5  10  15 9533.95  173.16
  -5  10  1623477.93  258.37
  -5  10  17   17.67   29.72
  -5  10  18 1946.37   74.05
  -5  10  19 9832.83  162.47
  -5  10  20 8905.85  152.85
  -5  10  21 5732.51  118.15
  -5  10  22  105.27   28.22
  -5  10  23   38.50   27.69
  -5  10  24 2038.29   71.18
  -5  10  25 1906.72   66.83
  -5  10  26 2814.05   81.15
  -5  10  27 2489.78  117.05
  -5  10  28   16.58   33.14
  -5  10  29   50.88   35.21
  -5  10  30  477.12   61.31
  -5  10  31  136.70   43.74
  -5  10  32 1700.38  128.56
  -5  10  33  982.15   88.49
  -5  10  34  445.28   42.79
  -5  10  35  264.70   68.42
  -5  11  -4  781.61   54.15
  -5  11  -3 8207.94  204.06
  -5  11  -2   43.41   32.97
  -5  11  -1 2963.28  121.95
  -5  11   0   47.17   35.56
  -5  11   1 5853.08  211.87
  -5  11   2  910.69   77.11
  -5  11   3  516.87   41.42
  -5  11   4 5269.22  130.74
  -5  11   510756.64  179.57
  -5  11   6  989.24   43.67
  -5  11   7  520.26   45.26
  -5  11   8 4532.58  130.31
  -5  11   9 2853.57  124.79
  -5  11  10   98.57   41.09
  -5  11  11 4040.96  121.52
  -5  11  12 3755.45   93.01
  -5  11  1323117.78  401.78
  -5  11  14  922.86   74.32
  -5  11  15 8325.28  170.95
  -5  11  16 5428.23  131.45
  -5  11  1722726.60  271.00
  -5  11  18  429.87   40.47
  -5  11  19 7519.82  146.17
  -5  11  20 4713.26  110.94
  -5  11  21 6269.45  122.89
  -5  11  22   88.30   28.87
  -5  11  23 1582.79   66.53
  -5  11  24 2839.34   84.29
  -5  11  25    1.35   34.03
  -5  11  26   61.91   35.00
  -5  11  27   18.54   39.61
  -5  11  28  685.83   61.24
  -5  11  29   24.62   42.04
  -5  11  30  108.02   46.19
  -5  11  31 1700.45  120.37
  -5  11  32   98.20   44.18
  -5  11  33   71.74   29.67
  -5  12  -418144.43  273.92
  -5  12  -3 1806.57   89.15
  -5  12  -2 3969.52  157.29
  -5  12  -1 2852.46  104.45
  -5  12   0  576.47   55.09
  -5  12   1  392.32   43.86
  -5  12   2 3423.79  126.84
  -5  12   3 2258.31  107.92
  -5  12   4   96.41   41.17
  -5  12   5  137.26   66.00
  -5  12   6  563.89   44.84
  -5  12   7  536.41   71.27
  -5  12   8  354.46   42.37
  -5  12   9 4156.75  136.12
  -5  12  10 3449.66  151.54
  -5  12  11 2272.94  102.89
  -5  12  12 1385.84   99.01
  -5  12  13 3180.78  136.42
  -5  12  14 1166.84   72.17
  -5  12  1510441.37  188.36
  -5  12  16 1618.57   87.48
  -5  12  1711177.98  191.39
  -5  12  18 8988.19  182.63
  -5  12  19  517.85   45.46
  -5  12  20 3983.67  111.19
  -5  12  21 1143.99   59.36
  -5  12  22    1.13   29.91
  -5  12  23  806.20   51.32
  -5  12  24  248.81   36.54
  -5  12  25   43.05   32.84
  -5  12  26  724.61   61.92
  -5  12  27   68.68   42.17
  -5  12  28   50.26   41.44
  -5  12  29   35.76   49.71
  -5  12  30  231.38   66.60
  -5  12  31  110.06   57.54
  -5  12  32    1.53   32.77
  -5  13  -4   20.38   42.60
  -5  13  -3 2904.22  112.77
  -5  13  -2  125.02   37.84
  -5  13  -1 5590.90  147.66
  -5  13   0  631.95   51.72
  -5  13   1  299.68   44.92
  -5  13   2  191.37   48.94
  -5  13   3    1.92   43.32
  -5  13   4  587.79   49.93
  -5  13   5  539.32   42.51
  -5  13   6 1571.79   96.27
  -5  13   7 2848.25  121.62
  -5  13   8 5039.99  153.38
  -5  13   9   68.83   43.68
  -5  13  10  419.91   51.61
  -5  13  11 4045.29  173.22
  -5  13  12  305.81   49.81
  -5  13  13  209.65   44.48
  -5  13  14    1.97   49.96
  -5  13  15 5668.92  165.25
  -5  13  16  715.66   62.26
  -5  13  17 5497.31  147.49
  -5  13  18  952.68   64.15
  -5  13  19 2867.29  111.47
  -5  13  20  694.61   59.63
  -5  13  21  202.98   38.46
  -5  13  22    2.88   32.68
  -5  13  23  396.31   48.37
  -5  13  24  155.77   50.04
  -5  13  25 1741.05   81.17
  -5  13  26    0.02   48.40
  -5  13  27    4.35   61.80
  -5  13  28    3.30   90.44
  -5  13  29  211.11   65.70
  -5  13  30   49.79   40.38
  -5  14  -4 2327.80  100.76
  -5  14  -310957.44  236.22
  -5  14  -2 2678.45  107.20
  -5  14  -1   76.89   32.03
  -5  14   0  441.23   45.37
  -5  14   1    1.58   32.57
  -5  14   2  130.98   42.61
  -5  14   3    8.83   40.01
  -5  14   4  622.15   54.07
  -5  14   5    0.71   35.22
  -5  14   6  493.78   56.66
  -5  14   7    0.67   43.91
  -5  14   8 4705.77  173.14
  -5  14   9  278.27   56.87
  -5  14  10 1168.28   91.67
  -5  14  11 1054.41  111.27
  -5  14  12  566.61   66.26
  -5  14  13  330.17   48.74
  -5  14  14  755.01   78.59
  -5  14  15  684.74   74.19
  -5  14  16  657.96   69.89
  -5  14  17 5943.19  176.86
  -5  14  18  497.61   58.38
  -5  14  19 1629.69   86.32
  -5  14  20 2096.16   94.06
  -5  14  21  275.03   36.74
  -5  14  22  312.98   44.12
  -5  14  23 1755.81   88.46
  -5  14  24  214.05   49.84
  -5  14  25  109.52   54.42
  -5  14  26  447.24   71.96
  -5  14  27 2289.90  168.36
  -5  14  28  206.80  103.73
  -5  14  29   21.40   58.53
  -5  15  -4 6342.48  167.69
  -5  15  -3 2739.97  115.83
  -5  15  -2 1960.00   96.18
  -5  15  -1  324.15   47.93
  -5  15   0   87.87   28.83
  -5  15   1  454.30   44.64
  -5  15   2 1746.53   75.17
  -5  15   3 1335.84   77.64
  -5  15   4 2368.63  113.18
  -5  15   5  399.09   51.01
  -5  15   6  532.85   51.82
  -5  15   7    1.45   42.41
  -5  15   8  726.35   73.94
  -5  15   9 1076.21   76.52
  -5  15  10  786.57   59.05
  -5  15  11  678.38   73.89
  -5  15  12  119.77   54.08
  -5  15  13 3096.72  138.21
  -5  15  14  165.71   53.96
  -5  15  15 3352.69  148.16
  -5  15  16 5771.61  189.41
  -5  15  17 1190.48   87.27
  -5  15  18  169.12   40.44
  -5  15  19 2366.09   99.85
  -5  15  20    8.87   32.11
  -5  15  21 1551.56   87.84
  -5  15  22  575.65   58.85
  -5  15  23  236.81   47.85
  -5  15  24 3540.94  259.88
  -5  15  25 1324.64  112.03
  -5  15  26  911.69  147.38
  -5  15  27    3.48   38.29
  -5  16  -4 1437.15   73.41
  -5  16  -3  461.19   60.64
  -5  16  -2   13.98   34.33
  -5  16  -1 3477.43  147.20
  -5  16   0 2543.53  106.55
  -5  16   1   21.21   42.50
  -5  16   2 6174.39  156.24
  -5  16   3  426.86   50.69
  -5  16   4 1615.29   83.44
  -5  16   5  346.03   47.17
  -5  16   6 2423.53  114.04
  -5  16   7  111.90   45.79
  -5  16   8   10.46   40.70
  -5  16   9   13.88   54.01
  -5  16  10  132.44   48.21
  -5  16  11 1840.35  102.08
  -5  16  12  261.02   51.15
  -5  16  13   10.92   41.40
  -5  16  14  429.17   55.34
  -5  16  15 2410.32  113.32
  -5  16  16  596.56   69.79
  -5  16  17  804.55   58.03
  -5  16  18 1346.09   77.63
  -5  16  19 3564.70  148.76
  -5  16  20  208.42   38.43
  -5  16  21 1331.26   83.89
  -5  16  22 1987.86  190.88
  -5  16  23   57.16   33.78
  -5  16  24 1173.24  287.77
  -5  17  -4  813.61   65.63
  -5  17  -3  637.90   47.72
  -5  17  -2  269.36   34.84
  -5  17  -1 1713.79   85.19
  -5  17   0 4985.78  166.96
  -5  17   1 1699.58   95.11
  -5  17   2  783.33   58.75
  -5  17   3 4261.05  148.57
  -5  17   4 2216.40  151.14
  -5  17   5   49.17   39.58
  -5  17   6  170.73   41.08
  -5  17   7  612.40   51.36
  -5  17   8  128.39   37.57
  -5  17   9   53.26   32.64
  -5  17  10   92.15   35.91
  -5  17  11   76.85   37.85
  -5  17  12  256.05   44.40
  -5  17  13    3.27   35.70
  -5  17  14  622.09   57.04
  -5  17  15  514.78   54.02
  -5  17  16   34.20   30.81
  -5  17  17  663.88   47.30
  -5  17  18 1278.41   91.43
  -5  17  19  206.84   38.77
  -5  17  20   23.50   33.14
  -5  17  21    1.78   34.73
  -5  18  -4    3.08   29.16
  -5  18  -3  310.44   37.41
  -5  18  -2  386.69   44.79
  -5  18  -1 1358.19   73.67
  -5  18   0  627.00   65.36
  -5  18   1 2887.20  176.32
  -5  18   2 1431.94  114.54
  -5  18   3  380.06   53.79
  -5  18   4 1117.59   84.43
  -5  18   5 1623.63   94.67
  -5  18   6  784.25   61.66
  -5  18   7   11.21   37.92
  -5  18   8 1460.11   76.91
  -5  18   9  735.79   57.19
  -5  18  10  145.16   31.27
  -5  18  11  145.69   38.21
  -5  18  12  327.35   44.14
  -5  18  13   55.38   29.85
  -5  18  14    1.88   48.43
  -5  18  15  105.48   24.93
  -5  18  16  148.79   22.87
  -5  18  17  111.29   23.13
  -5  18  18    3.35   35.42
  -5  19  -4   23.93   22.42
  -5  19  -3   17.90   26.67
  -5  19  -2   99.24   34.72
  -5  19  -1  612.12   70.24
  -5  19   0   14.88   25.36
  -5  19   1   26.34   33.13
  -5  19   2 1899.59   80.29
  -5  19   3  111.80   38.64
  -5  19   4  412.28   41.41
  -5  19   5 1498.56  121.20
  -5  19   6  157.03   35.15
  -5  19   7  736.23   91.76
  -5  19   8 1748.34  106.28
  -5  19   9  299.29   42.30
  -5  19  10  110.41   32.57
  -5  19  11 1035.07   73.21
  -5  19  12  811.57   80.58
  -5  19  13   11.87   35.78
  -5  19  14  135.86   42.27
  -4   0  -267463.97 2429.96
  -4   0   0111693.0 2430.31
  -4   0   2136650.3 2640.73
  -4   0   4 7151.49  319.52
  -4   0   6108397.0 1577.03
  -4   0   8  637.43  510.80
  -4   0  1033505.16 1393.85
  -4   0  12  961.78  244.06
  -4   0  1429001.14 1069.38
  -4   0  16  340.12  154.11
  -4   0  1827507.70 1112.76
  -4   0  20 8941.29  695.91
  -4   0  2231606.34 1372.56
  -4   0  2451593.65 1099.11
  -4   0  2629654.21  628.46
  -4   0  2817402.20  273.22
  -4   0  30  754.29   78.42
  -4   0  32  627.61   73.64
  -4   0  34  676.98   60.14
  -4   0  3614888.49  550.64
  -4   0  38   77.72   35.93
  -4   0  40  674.06   75.65
  -4   1  -3 4283.76  387.41
  -4   1  -2  372.49  276.60
  -4   1  -135472.52 1110.97
  -4   1   0118690.0 1958.99
  -4   1   1 4452.97  568.50
  -4   1   230383.31 1743.60
  -4   1   3125425.1 6520.70
  -4   1   472473.01 3364.50
  -4   1   5  470.19  120.30
  -4   1   735701.65 3293.70
  -4   1   8 2819.31  262.49
  -4   1   9  632.36  142.00
  -4   1  10 9551.23  462.83
  -4   1  11 2743.44  182.68
  -4   1  1235685.75  841.20
  -4   1  1335028.79  773.39
  -4   1  14  546.46  133.84
  -4   1  1511221.68  473.53
  -4   1  16 8211.71  396.87
  -4   1  1712245.26  480.15
  -4   1  18  597.14  126.91
  -4   1  19  818.60  102.65
  -4   1  20 5585.04  392.39
  -4   1  21 8774.79  505.56
  -4   1  2210318.50  508.53
  -4   1  23   17.81  205.83
  -4   1  2413782.02  188.36
  -4   1  2517116.44  280.01
  -4   1  2616746.22  264.62
  -4   1  27 1104.19   44.24
  -4   1  28 3108.50   84.92
  -4   1  29 7151.21  126.13
  -4   1  30 2121.21   74.46
  -4   1  31  111.92   30.24
  -4   1  32   53.74   34.33
  -4   1  33 1439.07   68.70
  -4   1  34 5789.29  138.58
  -4   1  35 3519.56  108.16
  -4   1  36  352.72   41.91
  -4   1  37 1344.44   58.53
  -4   1  38 2806.23   98.70
  -4   1  39  697.43   42.71
  -4   1  40    2.11   22.85
  -4   2  -318336.92  576.61
  -4   2  -232431.38  961.55
  -4   2  -1 5385.40  470.75
  -4   2   019934.44  656.35
  -4   2   158820.99 1980.00
  -4   2   2 6199.27  731.55
  -4   2   318961.16  705.85
  -4   2   427471.84 1268.29
  -4   2   542965.98 2194.71
  -4   2   612662.78  975.57
  -4   2   7 4376.93  357.93
  -4   2   813308.21  539.03
  -4   2   9 3806.70  209.76
  -4   2  10 7588.68  312.55
  -4   2  11 9733.88  400.64
  -4   2  12 6193.69  260.68
  -4   2  1325477.04  667.44
  -4   2  14  171.43   64.89
  -4   2  1518420.52  637.62
  -4   2  16   28.28  106.50
  -4   2  17  231.28  146.34
  -4   2  18  241.98  151.88
  -4   2  1911249.60  528.47
  -4   2  20  204.00  104.15
  -4   2  21   73.92  118.86
  -4   2  22 2557.76  341.78
  -4   2  23 4815.65  133.57
  -4   2  24  487.43   42.93
  -4   2  25  251.31   55.87
  -4   2  26  278.42   27.05
  -4   2  2716859.12  252.57
  -4   2  28  558.02   45.02
  -4   2  29  424.26   33.32
  -4   2  30  176.35   31.63
  -4   2  31    0.12   28.80
  -4   2  32    1.44   31.70
  -4   2  33 1554.71   72.57
  -4   2  34   69.05   34.99
  -4   2  35 4566.63  144.37
  -4   2  36  219.33   35.94
  -4   2  37 1794.04   65.61
  -4   2  38  857.82   47.72
  -4   2  39   88.72   25.01
  -4   2  40    1.32   30.12
  -4   3  -3 5846.36  420.89
  -4   3  -226547.34  978.90
  -4   3  -127255.24 1134.76
  -4   3   015297.25  606.41
  -4   3   139410.83 1914.86
  -4   3   266860.00 2513.48
  -4   3   324726.48 1850.82
  -4   3   4 1315.53  516.22
  -4   3   5 7601.85  533.83
  -4   3   622949.64 1216.88
  -4   3   7 9197.49  249.54
  -4   3   8 9461.24  436.45
  -4   3   9   53.56   50.48
  -4   3  10  728.71   94.02
  -4   3  11  529.35  155.71
  -4   3  12 2801.13  188.96
  -4   3  1312438.29  500.66
  -4   3  14 7326.83  431.21
  -4   3  15 4187.65  373.99
  -4   3  16 6470.54  384.28
  -4   3  1741189.23 1177.52
  -4   3  18 3945.38  513.68
  -4   3  1910917.65  621.56
  -4   3  20 1276.57  208.76
  -4   3  2116313.00  722.99
  -4   3  22  669.68  167.67
  -4   3  23  792.59   36.85
  -4   3  24  569.04   40.91
  -4   3  25  711.33   41.19
  -4   3  26  985.71   51.94
  -4   3  27    3.87   33.13
  -4   3  28  536.71   38.85
  -4   3  29 1468.67   65.24
  -4   3  30   57.92   28.76
  -4   3  31   24.65   27.54
  -4   3  32  812.19   50.10
  -4   3  33 2028.66   70.71
  -4   3  34  734.24   52.54
  -4   3  35  552.43   45.72
  -4   3  36  124.02   27.33
  -4   3  37  234.78   31.60
  -4   3  38   88.08   23.66
  -4   3  39  210.22   30.92
  -4   3  40  338.10   38.47
  -4   4  -324976.79  964.68
  -4   4  -2128485.9 2346.87
  -4   4  -166954.38 1532.58
  -4   4   0   89.79  172.14
  -4   4   111776.78  748.39
  -4   4   2    2.55  117.88
  -4   4   316882.74  710.93
  -4   4   4 3219.04  246.18
  -4   4   5  744.02   92.37
  -4   4   6  367.50  364.81
  -4   4   7 9668.49  590.00
  -4   4   8  925.14  118.78
  -4   4   9   65.22  113.20
  -4   4  1025752.51 1070.47
  -4   4  1110718.88  599.75
  -4   4  12  395.58  213.84
  -4   4  1315707.36  828.15
  -4   4  14    3.33  160.75
  -4   4  15  262.13  149.11
  -4   4  1618963.80 1218.01
  -4   4  1734000.05 1447.93
  -4   4  1897328.10 2405.92
  -4   4  1910141.01  663.90
  -4   4  2023232.68 1518.27
  -4   4  21   23.69  172.46
  -4   4  2213712.08  208.89
  -4   4  23 1102.40   59.64
  -4   4  24    0.29   25.00
  -4   4  25 1651.00   65.12
  -4   4  26   81.59   25.92
  -4   4  27  115.83   24.79
  -4   4  28 1150.45   57.88
  -4   4  29 1587.86   77.63
  -4   4  30  105.83   32.38
  -4   4  31  188.19   28.55
  -4   4  32  725.41   54.16
  -4   4  33  787.45   56.18
  -4   4  34  242.45   32.19
  -4   4  35  125.97   31.21
  -4   4  36 1082.86   59.40
  -4   4  37    0.10   23.37
  -4   4  38    1.66   32.71
  -4   4  39    0.73   24.30
  -4   5  -370145.54 1723.53
  -4   5  -2106218.3 2155.30
  -4   5  -1  418.00  168.28
  -4   5   0 3961.95  441.53
  -4   5   1 5176.02  660.20
  -4   5   2 1122.01  142.34
  -4   5   3 2754.26  426.56
  -4   5   4 2167.84  434.42
  -4   5   5 8049.98  730.54
  -4   5   6  380.71  123.26
  -4   5   715552.33  865.69
  -4   5   824333.43 1176.10
  -4   5   9 7646.77  608.70
  -4   5  1012263.48  643.33
  -4   5  1175817.79 1842.65
  -4   5  1219067.92  875.12
  -4   5  1329964.82 1278.00
  -4   5  1410442.04  981.51
  -4   5  15 3417.32  402.02
  -4   5  1650017.58 2173.19
  -4   5  1710438.77  994.88
  -4   5  1816723.27 1297.09
  -4   5  19   56.67  212.49
  -4   5  2072004.49 3636.70
  -4   5  21 4273.79  699.39
  -4   5  22 8280.21  144.58
  -4   5  23 1232.90   57.17
  -4   5  24  733.84   47.13
  -4   5  25   18.22   23.88
  -4   5  26  821.74   48.33
  -4   5  27 1817.48   71.54
  -4   5  28 2361.16   85.14
  -4   5  29  320.95   43.91
  -4   5  30   18.70   29.55
  -4   5  31 4492.24  118.01
  -4   5  32  894.52   59.68
  -4   5  33 2106.86   81.00
  -4   5  34 1583.27   59.66
  -4   5  35  603.96   44.37
  -4   5  36  118.49   36.36
  -4   5  37  276.66   36.16
  -4   5  38  331.97   39.80
  -4   5  39  157.02   27.34
  -4   6  -3120967.8 4455.05
  -4   6  -2  268.98  236.04
  -4   6  -1 2688.57  386.63
  -4   6   0 2984.36  425.29
  -4   6   1 3946.10  388.76
  -4   6   2    4.78  125.43
  -4   6   3 3964.00  424.81
  -4   6   413326.74  807.85
  -4   6   517846.02 1044.37
  -4   6   615198.32  953.83
  -4   6   7    0.67  123.29
  -4   6   847043.33 1719.81
  -4   6   956943.78 1695.85
  -4   6  1034672.59 1292.76
  -4   6  1111507.48  732.81
  -4   6  1237487.95 1464.76
  -4   6  1325837.63 1099.07
  -4   6  14 3281.20  355.92
  -4   6  1512783.30 1040.82
  -4   6  1612704.63 1039.55
  -4   6  17 5764.00  766.12
  -4   6  1818363.04 1389.69
  -4   6  1947239.73 2330.40
  -4   6  20 3369.28  240.54
  -4   6  21 2327.78   79.97
  -4   6  22  784.57   34.87
  -4   6  23  444.26   31.41
  -4   6  24  472.24   34.11
  -4   6  25   13.64   24.94
  -4   6  26 3219.74  111.39
  -4   6  27 1423.87   69.43
  -4   6  28    3.86   32.96
  -4   6  29 1703.03   78.26
  -4   6  30 5832.29  144.39
  -4   6  31  551.61   47.86
  -4   6  32  400.22   44.51
  -4   6  33  294.88   43.31
  -4   6  34 2657.53  111.15
  -4   6  35 1293.00   54.96
  -4   6  36   91.43   28.92
  -4   6  37  246.23   28.58
  -4   6  38  158.50   28.42
  -4   7  -3  110.84  158.81
  -4   7  -2 6881.55 1033.01
  -4   7  -1 1580.70  463.08
  -4   7   0 1665.11  419.95
  -4   7   1 2313.41  587.86
  -4   7   212187.82  793.05
  -4   7   3    4.68  115.34
  -4   7   4 4243.62  523.20
  -4   7   5  249.44  190.65
  -4   7   636956.43 1564.92
  -4   7   711893.34  887.06
  -4   7   8 5875.81  561.51
  -4   7   951838.73 1648.89
  -4   7  1040153.45 1446.73
  -4   7  1128139.05 1247.67
  -4   7  12 1293.62  250.21
  -4   7  1346884.57 1694.24
  -4   7  1410386.60  933.75
  -4   7  15  219.80  135.09
  -4   7  16    0.25  135.25
  -4   7  1713216.36 1154.83
  -4   7  18  899.73  689.34
  -4   7  19 1337.80   78.43
  -4   7  20  942.47   58.03
  -4   7  2113578.88  191.09
  -4   7  22   22.51   22.23
  -4   7  23  109.29   23.75
  -4   7  24  564.72   38.59
  -4   7  25 7085.84  147.60
  -4   7  26  427.47   44.11
  -4   7  27    0.25   32.54
  -4   7  28 1616.91   69.67
  -4   7  29 2169.25   83.31
  -4   7  30  585.87   53.33
  -4   7  31   38.08   34.54
  -4   7  32 2188.46  144.33
  -4   7  33  180.08   32.85
  -4   7  34   71.00   28.44
  -4   7  35  429.95   38.88
  -4   7  36  717.97   49.97
  -4   7  37   15.49   23.69
  -4   7  38   34.62   30.04
  -4   8  -3   22.12  282.62
  -4   8  -2 1821.06  688.75
  -4   8  -1 1702.32  472.63
  -4   8   0 1294.66  460.70
  -4   8   114904.54 1515.44
  -4   8   225556.77 2103.51
  -4   8   3 1211.25  498.58
  -4   8   4    4.28  212.38
  -4   8   5 1573.73  457.36
  -4   8   611617.55 1260.20
  -4   8   7 2316.56  448.09
  -4   8   8 3028.71  527.50
  -4   8   914068.19 1079.64
  -4   8  1040283.55 1938.25
  -4   8  1124301.03 1511.76
  -4   8  12   26.48  205.96
  -4   8  13 2795.87  865.21
  -4   8  14 7931.40 1494.49
  -4   8  15 4207.88  999.58
  -4   8  16  280.58  327.95
  -4   8  17  166.90  467.86
  -4   8  1812125.11  165.43
  -4   8  19 3626.68   86.90
  -4   8  20   40.79   31.82
  -4   8  21  942.33   48.61
  -4   8  22  281.20   33.13
  -4   8  23  764.93   43.73
  -4   8  24  169.99   28.82
  -4   8  25  163.49   32.15
  -4   8  26 1385.04   76.34
  -4   8  27 2839.59  106.23
  -4   8  28 2293.07   94.64
  -4   8  29  441.84   51.49
  -4   8  30  145.76   39.18
  -4   8  31  421.62   47.43
  -4   8  32   10.17   49.63
  -4   8  33  413.97   46.53
  -4   8  34   85.73   30.70
  -4   8  35   53.56   30.86
  -4   8  36   35.53   27.91
  -4   8  37  145.46   31.33
  -4   9  -323963.60 2212.14
  -4   9  -218700.69 1896.97
  -4   9  -1   76.26  400.43
  -4   9   010306.34 1331.28
  -4   9   1 5621.13 1019.91
  -4   9   2 7739.26 1170.72
  -4   9   3  228.45  279.64
  -4   9   422643.55 1880.46
  -4   9   5 8765.64 1126.76
  -4   9   6    1.39  309.15
  -4   9   7 3023.40  638.76
  -4   9   8 8505.40  982.85
  -4   9   9 5004.63  771.19
  -4   9  10  241.27  223.01
  -4   9  1110373.81 1125.75
  -4   9  1240865.65 3154.74
  -4   9  13 4790.54 1277.30
  -4   9  14  929.81  356.10
  -4   9  15 6785.69  249.39
  -4   9  16   10.57   24.13
  -4   9  17  268.10   37.04
  -4   9  18 2435.69   77.21
  -4   9  19 1816.58   60.58
  -4   9  20 2597.76   91.16
  -4   9  21   50.95   31.33
  -4   9  22    2.47   24.42
  -4   9  23  109.99   25.65
  -4   9  24 4068.97  115.17
  -4   9  25    0.20   34.46
  -4   9  26 5034.35  127.91
  -4   9  27 3146.86  116.27
  -4   9  28 2838.45   99.27
  -4   9  29  232.88   38.36
  -4   9  30 1077.67   65.80
  -4   9  31 2055.93   85.06
  -4   9  32   94.68   33.97
  -4   9  33  408.56   49.24
  -4   9  34  518.62   68.15
  -4   9  35  160.22   26.74
  -4   9  36    3.51   41.47
  -4  10  -3   63.91  423.27
  -4  10  -2 4833.22 1129.26
  -4  10  -1 6824.63 1069.89
  -4  10   011672.22 1419.06
  -4  10   115090.65 1826.77
  -4  10   233057.57 2521.76
  -4  10   3 1158.00  348.41
  -4  10   4  497.62  294.85
  -4  10   515258.64 1156.63
  -4  10   6  666.39  367.12
  -4  10   7 8204.72  910.90
  -4  10   833363.26 1909.10
  -4  10   9 2499.69  436.49
  -4  10  10 6796.78  744.77
  -4  10  1146334.62 3188.72
  -4  10  1214748.10  251.95
  -4  10  13 6851.35  154.63
  -4  10  1416501.59  205.74
  -4  10  15 4277.62  100.37
  -4  10  1612678.21  185.71
  -4  10  1712797.22  205.29
  -4  10  18 1066.64   62.53
  -4  10  19 1976.54   70.46
  -4  10  20 3897.94   97.45
  -4  10  21   24.90   26.08
  -4  10  22    1.11   24.06
  -4  10  23   69.09   27.50
  -4  10  24 1095.77   54.48
  -4  10  25 2796.42  101.38
  -4  10  26  178.76   38.39
  -4  10  27 3549.52  105.62
  -4  10  28 7393.72  147.63
  -4  10  29 2394.23   87.48
  -4  10  30 1605.89   79.94
  -4  10  31 1348.03   74.87
  -4  10  32    1.78   37.66
  -4  10  33 2014.61  120.51
  -4  10  34 1739.67  106.69
  -4  10  35  163.60   54.31
  -4  11  -3  295.72  407.96
  -4  11  -2 9186.47 1349.86
  -4  11  -1  256.10  197.41
  -4  11   0 1468.50  473.63
  -4  11   1   91.65  423.33
  -4  11   2  174.90  214.89
  -4  11   311428.70 1486.66
  -4  11   4 3923.70  799.25
  -4  11   5 6288.83 1061.43
  -4  11   6 5186.81  576.81
  -4  11   7 3573.74  224.37
  -4  11   8  153.91   35.67
  -4  11   9 6872.56  174.72
  -4  11  1046202.76  404.05
  -4  11  11 2471.63   94.48
  -4  11  12 6198.95  158.16
  -4  11  13 7203.53  151.98
  -4  11  1452064.24  624.40
  -4  11  15  492.81   40.00
  -4  11  16 2546.89   92.14
  -4  11  17 6893.58  142.79
  -4  11  1813261.64  209.43
  -4  11  19   91.97   29.86
  -4  11  20   71.34   28.21
  -4  11  21 5264.27  122.17
  -4  11  22    0.19   28.76
  -4  11  23  183.07   32.26
  -4  11  24 3579.02  102.29
  -4  11  25 2788.44   89.65
  -4  11  26 3317.08   98.68
  -4  11  27   78.32   32.09
  -4  11  28 5187.01  143.76
  -4  11  29  650.68   51.55
  -4  11  30 1526.58   82.58
  -4  11  31    0.45   36.69
  -4  11  32 5147.44  201.74
  -4  11  33   14.28   57.22
  -4  11  34   99.83   37.10
  -4  12  -323656.09  341.31
  -4  12  -2    2.34   33.59
  -4  12  -1 3003.47   98.89
  -4  12   0   31.78   29.12
  -4  12   1 5269.65  162.28
  -4  12   2 1950.45  108.29
  -4  12   3   48.25   34.88
  -4  12   4    1.41   31.86
  -4  12   5  745.03   58.86
  -4  12   6  329.35   55.89
  -4  12   7 3400.15   80.65
  -4  12   8 2385.26  125.25
  -4  12   9 6380.57  153.93
  -4  12  10 2626.23  127.42
  -4  12  11   73.74   40.14
  -4  12  1211645.19  206.35
  -4  12  13 7103.82  163.54
  -4  12  14  542.60   40.01
  -4  12  15 2743.52   88.40
  -4  12  1618427.64  290.40
  -4  12  17  757.40   64.16
  -4  12  18 4994.75  142.12
  -4  12  19 9736.94  178.63
  -4  12  20   76.68   32.42
  -4  12  21  210.26   34.46
  -4  12  22   17.97   30.82
  -4  12  23  243.71   39.50
  -4  12  24  675.37   42.82
  -4  12  25  494.88   39.64
  -4  12  26 1995.41   77.88
  -4  12  27  292.53   36.53
  -4  12  28  125.12   34.25
  -4  12  29 1474.46   75.34
  -4  12  30 1160.45   72.09
  -4  12  31  187.42   46.57
  -4  12  32  599.23   77.89
  -4  12  33   74.64   53.71
  -4  13  -3  173.05   41.56
  -4  13  -2 1681.91   92.37
  -4  13  -1   97.53   32.26
  -4  13   0   71.62   28.24
  -4  13   1 3245.62  116.26
  -4  13   2  107.04   31.49
  -4  13   3  470.40   39.42
  -4  13   411027.28  206.55
  -4  13   5  259.96   37.66
  -4  13   6  978.56   77.70
  -4  13   7 2380.30   82.05
  -4  13   8    5.17   37.10
  -4  13   9 1045.75   54.50
  -4  13  10    1.16   40.19
  -4  13  11 3142.34  114.42
  -4  13  12 7152.48  172.17
  -4  13  13 2411.53  111.28
  -4  13  14 1214.31  100.46
  -4  13  15  576.39   60.24
  -4  13  16 1881.05   90.97
  -4  13  17  318.02   51.97
  -4  13  18 1399.13   83.10
  -4  13  19  281.63   44.26
  -4  13  20 5079.04  139.17
  -4  13  21  921.07   54.38
  -4  13  22  275.68   41.76
  -4  13  23   25.62   33.59
  -4  13  24  287.13   35.57
  -4  13  25   40.97   34.08
  -4  13  26  866.79   53.83
  -4  13  27  156.03   35.69
  -4  13  28    8.18   40.70
  -4  13  29    0.28   49.24
  -4  13  30   10.72   48.94
  -4  13  31  112.05  179.75
  -4  14  -3  582.13   58.54
  -4  14  -2 5305.65  158.75
  -4  14  -1    1.82   33.34
  -4  14   0  714.44   53.55
  -4  14   1  519.00   43.34
  -4  14   2 5291.74  135.79
  -4  14   3 7157.72  171.57
  -4  14   4 2528.06   96.62
  -4  14   5  519.09   61.39
  -4  14   6 2550.83   95.33
  -4  14   7 6915.00  181.68
  -4  14   8  481.24   45.93
  -4  14   9 8057.57  197.82
  -4  14  10  216.87   43.90
  -4  14  11  688.26   69.13
  -4  14  12 1011.66   75.34
  -4  14  13   30.24   47.80
  -4  14  14 1227.24   89.50
  -4  14  15  197.28   56.33
  -4  14  16   57.57   51.98
  -4  14  17    4.28   51.29
  -4  14  18 2409.70  121.10
  -4  14  19    2.08   43.83
  -4  14  20  501.96   56.58
  -4  14  21  105.87   41.37
  -4  14  22    0.12   35.84
  -4  14  23  312.88   41.89
  -4  14  24 1075.67   86.52
  -4  14  25  315.97   57.94
  -4  14  26  422.46   64.77
  -4  14  27   67.96   59.14
  -4  14  28  625.18   89.22
  -4  14  29  591.44   98.57
  -4  14  30   19.86   66.44
  -4  15  -3  837.51   68.22
  -4  15  -2    0.97   34.00
  -4  15  -1  511.75   57.00
  -4  15   0  185.77   35.41
  -4  15   1 2551.04   98.19
  -4  15   2 3449.88  101.98
  -4  15   3 9847.35  184.52
  -4  15   4  556.39   52.87
  -4  15   5 7985.35  185.71
  -4  15   6 9168.46  206.59
  -4  15   7  193.21   45.79
  -4  15   8  305.94   49.29
  -4  15   9 1522.36   98.38
  -4  15  10 6140.90  190.53
  -4  15  11 2112.13  113.19
  -4  15  12   35.40   50.77
  -4  15  13 1073.12   90.91
  -4  15  14 5650.21  231.00
  -4  15  15  481.81   69.71
  -4  15  16  447.93   57.10
  -4  15  17  353.82   58.97
  -4  15  18 1038.38   75.00
  -4  15  19   62.84   44.77
  -4  15  20    0.64   44.42
  -4  15  21  863.78   75.86
  -4  15  22  129.75   52.56
  -4  15  23    0.53   40.37
  -4  15  24  695.12   70.28
  -4  15  25 2552.98  189.45
  -4  15  26   15.90   38.94
  -4  15  27  607.34  102.24
  -4  15  28  583.80   68.10
  -4  16  -3    3.96   40.24
  -4  16  -2   16.83   31.35
  -4  16  -1  158.32   42.22
  -4  16   0  913.28   68.58
  -4  16   111014.98  261.98
  -4  16   2  668.51   60.00
  -4  16   3 3289.30  125.99
  -4  16   4  846.36   72.87
  -4  16   5 6388.18  242.36
  -4  16   6 1696.31   92.02
  -4  16   7  367.20   49.52
  -4  16   8 4259.32  239.03
  -4  16   9   17.41   49.17
  -4  16  10   50.32   48.30
  -4  16  11 5772.25  198.08
  -4  16  12 5699.16  269.09
  -4  16  13    0.11   50.91
  -4  16  14  214.45   57.14
  -4  16  15 2568.82  144.01
  -4  16  16  968.76   86.18
  -4  16  17  112.05   42.12
  -4  16  18  467.34   60.49
  -4  16  19    5.39   40.19
  -4  16  20  405.76   44.55
  -4  16  21   14.81   32.73
  -4  16  22    3.53   38.70
  -4  16  23 2255.67  181.55
  -4  16  24  357.98   70.99
  -4  16  25   72.18   43.23
  -4  16  26   30.20   63.27
  -4  17  -3 2250.47   97.79
  -4  17  -2 2145.00   89.82
  -4  17  -1 1170.46   68.64
  -4  17   0 1811.60   86.20
  -4  17   1 3544.08  107.82
  -4  17   2 3118.57  126.78
  -4  17   3 2380.43  117.90
  -4  17   4 3394.42  168.20
  -4  17   5   87.57   49.35
  -4  17   6    4.03   48.55
  -4  17   7   23.57   40.18
  -4  17   8    2.45   48.56
  -4  17   9 1192.89   96.70
  -4  17  10  247.24   53.54
  -4  17  11    0.13   50.64
  -4  17  12 2545.16  165.12
  -4  17  13 4332.40  207.08
  -4  17  14   47.37   38.69
  -4  17  15  732.04   63.13
  -4  17  16   91.30   35.46
  -4  17  17  500.32   52.54
  -4  17  18    8.20   28.93
  -4  17  19  491.04   42.26
  -4  17  20  263.26   33.06
  -4  17  21   48.85   33.08
  -4  17  22  115.58   67.03
  -4  17  23    0.09   48.09
  -4  18  -3    0.23   32.69
  -4  18  -2  341.03   50.05
  -4  18  -1 3204.02  154.11
  -4  18   0 1714.63   84.60
  -4  18   1  453.89   52.47
  -4  18   2 1261.32   89.84
  -4  18   3 2714.05  123.95
  -4  18   4   42.42   42.40
  -4  18   5  534.14   64.69
  -4  18   6  519.56   62.95
  -4  18   7  112.38   46.77
  -4  18   8    9.96   40.80
  -4  18   9   41.70   39.05
  -4  18  10 2501.70  164.28
  -4  18  11  121.29   38.45
  -4  18  12  122.17   38.31
  -4  18  13  123.31   32.44
  -4  18  14  857.39   60.46
  -4  18  15    5.94   30.46
  -4  18  16  528.47   53.57
  -4  18  17  459.01   79.42
  -4  18  18   55.43   23.70
  -4  18  19   79.58   38.58
  -4  18  20   18.94   30.61
  -4  19  -3 1254.84  102.81
  -4  19  -2  928.77   93.69
  -4  19  -1    1.09   36.67
  -4  19   0  584.15   87.85
  -4  19   1 1106.94  118.65
  -4  19   2  368.78   35.25
  -4  19   3  953.17   81.97
  -4  19   4  375.78   42.62
  -4  19   5  868.88   73.75
  -4  19   6 1477.18  119.18
  -4  19   7    1.48   34.88
  -4  19   8  348.05   60.91
  -4  19   9  911.44   65.93
  -4  19  10   83.31   32.11
  -4  19  11   73.33   27.92
  -4  19  12  630.36   53.29
  -4  19  13  346.73   43.44
  -4  19  14  264.27   38.96
  -4  19  15   10.23   20.13
  -4  19  16   62.38   36.12
  -4  20  -3  999.51   68.48
  -4  20  -2  100.65   31.78
  -4  20  -1  278.31   48.01
  -4  20   0  672.16   56.13
  -4  20   1   66.01   31.19
  -4  20   2  185.22   29.43
  -4  20   3    3.77   26.65
  -4  20   4  767.19  110.28
  -4  20   5  174.56   66.93
  -4  20   6  287.18   54.65
  -4  20   7  136.80   28.24
  -4  20   8  251.13   38.35
  -4  20   9  406.93   49.81
  -4  20  10   52.71   40.36
  -3   0  -198854.20 2767.89
  -3   0   1255597.8 4325.95
  -3   0   3251414.3 3177.76
  -3   0   530383.54  825.77
  -3   0   760771.32 2841.20
  -3   0   9 2007.46  250.61
  -3   0  11554110.0 3852.12
  -3   0  1314806.87  733.57
  -3   0  15637176.1 4619.76
  -3   0  1715007.07  720.78
  -3   0  1949960.12 1489.31
  -3   0  21   12.46  148.09
  -3   0  23 2809.67  405.10
  -3   0  25 2784.05   94.69
  -3   0  27 4559.25  109.61
  -3   0  29  493.16   52.87
  -3   0  31 2056.07   94.16
  -3   0  3315743.05  344.13
  -3   0  35 4362.90  190.70
  -3   0  3716181.35  637.08
  -3   0  39   74.33   34.42
  -3   1  -219500.77  801.83
  -3   1  -1 7011.78  245.01
  -3   1   079130.48 2046.91
  -3   1   1168840.1 3001.60
  -3   1   2 9949.09 1053.40
  -3   1   368357.22 1587.33
  -3   1   4123417.3 1956.94
  -3   1   6 1695.75  112.20
  -3   1   7  937.55  116.93
  -3   1   8  414.54  110.17
  -3   1   9 4648.45  224.17
  -3   1  10 6988.54  235.61
  -3   1  1116490.90  379.11
  -3   1  1288491.99 1170.47
  -3   1  13305161.2 2151.63
  -3   1  1498838.36 1265.43
  -3   1  15  182.63  112.49
  -3   1  1683279.13 1252.80
  -3   1  17111324.3 1440.78
  -3   1  1833363.47  835.58
  -3   1  19 1370.42  208.00
  -3   1  20  948.70  160.17
  -3   1  21  227.07   72.35
  -3   1  22 2325.10  204.90
  -3   1  23  200.16  150.70
  -3   1  24  135.76  101.92
  -3   1  25 2760.48   84.38
  -3   1  26   42.42   23.89
  -3   1  27 1894.73   73.62
  -3   1  28  693.15   30.74
  -3   1  29  303.51   31.68
  -3   1  30    1.89   25.45
  -3   1  31  781.03   54.34
  -3   1  32  737.08   54.81
  -3   1  33 2375.69   82.18
  -3   1  34 6466.95  157.35
  -3   1  35 8813.83  248.09
  -3   1  36 3368.72  108.32
  -3   1  37 1450.74   77.02
  -3   1  38 1733.93   74.19
  -3   1  39 1295.59   58.23
  -3   1  40  251.70   38.17
  -3   2  -2  364.11  203.97
  -3   2  -1124992.0 2206.00
  -3   2   0 7076.72  352.69
  -3   2   1 5800.86  644.85
  -3   2   2123238.3 1720.25
  -3   2   315639.24  712.12
  -3   2   418781.70 1273.30
  -3   2   519367.58  888.57
  -3   2   673269.29 1019.73
  -3   2   7 5168.05  251.73
  -3   2   8  639.12   42.12
  -3   2   9 6955.17  285.44
  -3   2  1015792.53  367.61
  -3   2  11  767.00   80.62
  -3   2  1236716.64  742.72
  -3   2  13  549.38  178.50
  -3   2  14121437.0 1783.81
  -3   2  15 1065.81  124.51
  -3   2  1627554.64  765.48
  -3   2  17  444.82  121.57
  -3   2  18  672.41   80.78
  -3   2  19  437.39   94.31
  -3   2  20 2148.57  161.52
  -3   2  21 1515.37  205.37
  -3   2  22 1602.80  239.48
  -3   2  23  109.48  168.62
  -3   2  24  557.50   65.49
  -3   2  25  599.79   34.09
  -3   2  26   97.85   32.03
  -3   2  27   27.65   26.10
  -3   2  28 2708.98   82.52
  -3   2  29  935.18   53.43
  -3   2  30  620.91   46.04
  -3   2  31  948.29   67.74
  -3   2  32 1586.39   79.12
  -3   2  33  628.56   51.39
  -3   2  34 1029.02   63.54
  -3   2  35 1297.90   68.11
  -3   2  36 6699.36  143.82
  -3   2  37    8.71   26.81
  -3   2  38 1250.01   59.62
  -3   2  39  317.80   28.52
  -3   2  40    1.92   21.30
  -3   3  -217154.05  592.40
  -3   3  -116646.09  750.04
  -3   3   0  346.61  144.25
  -3   3   1   29.88  139.37
  -3   3   2 5340.12  279.52
  -3   3   345213.08 1194.21
  -3   3   4142683.7 1988.29
  -3   3   5 8216.59  292.86
  -3   3   6  244.69   66.65
  -3   3   7 3895.47  267.27
  -3   3   8   36.67   53.75
  -3   3   9 1052.68  200.50
  -3   3  10 1306.66  126.19
  -3   3  1123010.45  580.02
  -3   3  12  154.14   62.46
  -3   3  13 6468.20  389.63
  -3   3  14 4742.01  408.23
  -3   3  15   54.96   94.18
  -3   3  16 1494.70  201.76
  -3   3  17 6163.92  470.35
  -3   3  1841118.58 1054.27
  -3   3  19  268.22  148.41
  -3   3  2011086.11  511.02
  -3   3  2111567.45  751.99
  -3   3  22 9851.36  655.01
  -3   3  23   25.04  113.44
  -3   3  24  147.32   27.35
  -3   3  25    6.84   22.90
  -3   3  26 3363.73   97.26
  -3   3  27 1336.77   59.03
  -3   3  28  208.10   26.67
  -3   3  29  580.60   40.81
  -3   3  30 4252.15  116.13
  -3   3  31   12.35   32.42
  -3   3  32   22.88   30.07
  -3   3  33  255.51   34.48
  -3   3  34 1870.77   68.64
  -3   3  35 2135.74   74.66
  -3   3  36   20.63   31.43
  -3   3  37  832.29   51.06
  -3   3  38  420.87   31.71
  -3   3  39   65.36   22.70
  -3   3  40  500.67   45.35
  -3   4  -2  402.25  143.59
  -3   4  -160292.62 1342.92
  -3   4   0 4762.26  514.31
  -3   4   1  834.98  309.94
  -3   4   2 6472.62  369.33
  -3   4   355985.23 1195.30
  -3   4   440908.47  991.56
  -3   4   5 4305.44  262.58
  -3   4   616882.11 1067.61
  -3   4   745614.47 1690.32
  -3   4   821502.71  905.79
  -3   4   9  278.22   51.04
  -3   4  10 5284.01  307.55
  -3   4  11 1064.48   68.24
  -3   4  12 6313.68  325.10
  -3   4  13  262.81   89.48
  -3   4  14 9001.57  428.60
  -3   4  1513351.27  628.78
  -3   4  16 4889.11  542.62
  -3   4  17 2649.39  385.20
  -3   4  18 1581.83  223.24
  -3   4  19110573.9 2003.07
  -3   4  2017530.39  991.60
  -3   4  21 3105.12  449.25
  -3   4  22 2858.72  376.39
  -3   4  2310305.32  178.25
  -3   4  24  547.11   37.35
  -3   4  25  853.88   62.01
  -3   4  26 2605.85   96.24
  -3   4  27 3038.56  102.91
  -3   4  28 3056.01   93.67
  -3   4  29 8468.45  154.68
  -3   4  30  494.57   45.40
  -3   4  31  586.81   46.10
  -3   4  32  268.54   34.37
  -3   4  33  144.71   28.17
  -3   4  34  145.68   26.21
  -3   4  35   31.34   27.51
  -3   4  36  265.56   35.24
  -3   4  37  168.65   27.91
  -3   4  38  714.20   70.78
  -3   4  39  335.06   41.69
  -3   4  40   61.46   34.92
  -3   5  -211941.63  480.69
  -3   5  -174045.05 1577.36
  -3   5   0    2.18   99.86
  -3   5   111102.53  527.36
  -3   5   2 3897.15  480.82
  -3   5   3 1043.92  222.97
  -3   5   4 3473.55  456.68
  -3   5   5 6575.60  643.03
  -3   5   662910.54 1740.31
  -3   5   719902.94 1005.73
  -3   5   8 1584.75  146.25
  -3   5   9 1097.30  229.21
  -3   5  1024377.15  770.23
  -3   5  11 8808.67  539.32
  -3   5  12 8770.80  650.54
  -3   5  13 1672.09  508.06
  -3   5  1415650.15  806.53
  -3   5  15  515.95  169.52
  -3   5  1615301.79  747.56
  -3   5  1789671.32 2167.83
  -3   5  18 1753.51  326.97
  -3   5  1916314.27  888.84
  -3   5  2013595.82  934.04
  -3   5  2146426.75 2132.55
  -3   5  22  147.72  245.85
  -3   5  23 5768.34  115.13
  -3   5  24 7994.60  125.87
  -3   5  25 1973.98   75.49
  -3   5  26 1637.52   76.48
  -3   5  27 3534.59   97.27
  -3   5  28 2878.04   83.23
  -3   5  29 8261.51  154.07
  -3   5  30  232.64   39.19
  -3   5  31 3489.11  102.35
  -3   5  32 1622.91   64.96
  -3   5  33  688.41   49.75
  -3   5  34   58.33   24.87
  -3   5  35   89.91   23.34
  -3   5  36   25.72   20.84
  -3   5  37    4.37   33.34
  -3   5  38  235.33   35.15
  -3   5  39  298.54   43.64
  -3   6  -2243837.0 4937.71
  -3   6  -1161115.1 4327.04
  -3   6   0 8137.92 1050.77
  -3   6   1118875.1 2213.84
  -3   6   2  602.86  151.94
  -3   6   334079.24 1215.31
  -3   6   4 6284.97  438.01
  -3   6   521425.42 1121.16
  -3   6   6 3027.92  410.82
  -3   6   7 1579.72  386.39
  -3   6   8 7508.27  480.07
  -3   6   9 9279.79  536.91
  -3   6  10 9155.02  588.11
  -3   6  11 4395.43  382.43
  -3   6  12 1186.43  256.76
  -3   6  13 2465.94  438.33
  -3   6  14   74.18  217.82
  -3   6  15 4120.53  607.74
  -3   6  1620615.87 1281.66
  -3   6  17 1475.30  360.00
  -3   6  1838721.85 1965.49
  -3   6  1912027.19 1027.42
  -3   6  2035333.20 1901.67
  -3   6  2112096.20 1183.86
  -3   6  22 8165.05  126.08
  -3   6  23   19.63   22.17
  -3   6  24 2324.71   61.13
  -3   6  25 1154.15   49.86
  -3   6  26  194.80   31.34
  -3   6  27 7517.95  134.74
  -3   6  2811641.52  185.17
  -3   6  29    1.33   28.72
  -3   6  30 1928.12   83.57
  -3   6  31 4334.86  116.82
  -3   6  32 2442.29   88.76
  -3   6  33    0.63   29.07
  -3   6  34  702.91   51.50
  -3   6  35  393.56   45.95
  -3   6  36   36.25   27.22
  -3   6  37   28.11   21.40
  -3   6  38   17.81   33.13
  -3   6  39  111.61   48.13
  -3   7  -2  242.67  192.14
  -3   7  -197879.76 3327.49
  -3   7   094639.57 3356.83
  -3   7   125120.30 1651.76
  -3   7   2 2613.29  573.00
  -3   7   344837.22 2116.49
  -3   7   4 2546.24  530.68
  -3   7   5 4504.92  536.41
  -3   7   6  228.88  149.79
  -3   7   7 3791.82  338.62
  -3   7   8 5878.35  481.20
  -3   7   9    0.13   99.51
  -3   7  1014681.49  728.04
  -3   7  11 2557.46  329.57
  -3   7  1221819.63 1777.41
  -3   7  13  736.52  310.25
  -3   7  14   71.10  249.80
  -3   7  15  449.87  337.56
  -3   7  16 5602.91 1055.58
  -3   7  17 1377.41  580.33
  -3   7  1822554.44 2097.13
  -3   7  19 1910.13  754.03
  -3   7  20 3547.54  168.08
  -3   7  21 1859.19   64.13
  -3   7  2210336.14  157.41
  -3   7  23  432.06   27.88
  -3   7  24   47.46   23.79
  -3   7  25  191.54   29.59
  -3   7  2613280.12  200.21
  -3   7  27 2400.09   87.21
  -3   7  28   98.71   27.52
  -3   7  29  232.02   34.78
  -3   7  3011420.21  196.04
  -3   7  31 2588.07  101.45
  -3   7  32  102.36   31.57
  -3   7  33  930.83   63.31
  -3   7  34   71.28   27.32
  -3   7  35  190.49   45.32
  -3   7  36  126.11   24.07
  -3   7  37  177.98   27.88
  -3   7  38  134.54   40.53
  -3   8  -233834.33 2233.62
  -3   8  -112595.28 1483.63
  -3   8   0 1445.97  371.30
  -3   8   122559.33 1898.33
  -3   8   2 2597.77  521.75
  -3   8   3  869.97  439.62
  -3   8   4 1464.38  351.69
  -3   8   5 1287.80  404.15
  -3   8   6 1480.94  264.74
  -3   8   7 2494.83  299.46
  -3   8   8  106.38  151.45
  -3   8   9 3275.51  495.55
  -3   8  1014819.92 1031.01
  -3   8  11 9552.77 1031.84
  -3   8  12 4247.32  894.15
  -3   8  13  728.53  395.04
  -3   8  14 2883.34  703.51
  -3   8  15 5408.57  803.32
  -3   8  16  288.76  335.26
  -3   8  17  673.74  289.16
  -3   8  18   32.96  234.66
  -3   8  1918526.04  226.53
  -3   8  20 6431.39  127.97
  -3   8  21  377.07   30.68
  -3   8  22  128.96   27.57
  -3   8  23 1071.09   40.58
  -3   8  24  450.66   43.49
  -3   8  25  157.44   30.43
  -3   8  26  398.83   29.45
  -3   8  27 5423.19  138.11
  -3   8  28 4402.08  124.58
  -3   8  29 4048.67  132.61
  -3   8  30  160.93   41.99
  -3   8  31  642.00   55.95
  -3   8  32  953.48   67.83
  -3   8  33  306.29   39.89
  -3   8  34  724.79   62.14
  -3   8  35  563.37   49.94
  -3   8  36  331.50   36.53
  -3   8  37  246.31   64.04
  -3   9  -2 3581.52  626.93
  -3   9  -1 6252.76  999.37
  -3   9   0    5.82  248.26
  -3   9   1 4398.40  622.88
  -3   9   2 8455.32  907.02
  -3   9   3 1008.59  580.03
  -3   9   4 1135.11  525.26
  -3   9   518665.21 1182.70
  -3   9   645116.86 1842.18
  -3   9   7  472.16  150.20
  -3   9   8 3664.93  604.61
  -3   9   9 8981.78  895.17
  -3   9  10 8785.73 1219.38
  -3   9  11 2388.28  572.52
  -3   9  12 4194.55 1085.41
  -3   9  1338830.19 2837.32
  -3   9  14  753.81  255.17
  -3   9  15  121.97  384.36
  -3   9  16  983.96  590.38
  -3   9  17  226.68   64.09
  -3   9  18    0.95   32.96
  -3   9  19  783.33   55.85
  -3   9  20 2571.73   90.98
  -3   9  21 4014.90   99.06
  -3   9  22  538.36   34.82
  -3   9  23    9.87   28.44
  -3   9  24 8948.17  160.84
  -3   9  25 3471.26  107.92
  -3   9  26   58.17   33.49
  -3   9  27 3792.77  115.01
  -3   9  28 5437.42  152.71
  -3   9  29 3541.81  128.47
  -3   9  30  112.66   40.33
  -3   9  31  680.53   55.50
  -3   9  32   70.03   23.89
  -3   9  33  111.30   27.35
  -3   9  34    9.12   29.08
  -3   9  35  810.83   64.74
  -3   9  36  283.14   60.65
  -3  10  -2 8636.35 1157.88
  -3  10  -1  433.69  246.66
  -3  10   014726.97 1469.32
  -3  10   1 4665.88  785.34
  -3  10   218255.71 1853.60
  -3  10   361505.88 3050.05
  -3  10   436044.43 2124.50
  -3  10   510374.01  983.35
  -3  10   613509.07 1108.65
  -3  10   7 3775.84  510.52
  -3  10   819820.56 1419.17
  -3  10   950999.69 3156.22
  -3  10  10  621.90  318.91
  -3  10  11 1608.66  647.07
  -3  10  1222592.16 2212.35
  -3  10  13 4482.65  968.22
  -3  10  14  669.55  140.96
  -3  10  15 9210.96  176.89
  -3  10  16 1263.36   39.67
  -3  10  17   78.84   20.75
  -3  10  18  263.65   35.22
  -3  10  19 4325.43  110.75
  -3  10  20 4844.63  120.75
  -3  10  21 1526.36   60.93
  -3  10  2211399.61  171.98
  -3  10  23 1472.18   71.75
  -3  10  24  165.70   34.67
  -3  10  25 5718.75  138.53
  -3  10  2612610.72  206.87
  -3  10  27  766.62   50.87
  -3  10  28 2122.41   84.61
  -3  10  29 7596.55  174.17
  -3  10  30 1419.53   83.42
  -3  10  31  291.53   42.60
  -3  10  32  217.39   32.53
  -3  10  33    0.01   27.61
  -3  10  34  102.82   33.19
  -3  10  35  149.50   41.15
  -3  10  36  656.08   86.19
  -3  11  -2 1530.09  507.31
  -3  11  -1 9185.85 1176.38
  -3  11   0  561.41  280.04
  -3  11   115699.45 1568.74
  -3  11   2  855.16  520.78
  -3  11   337439.12 1936.62
  -3  11   420129.52 1269.13
  -3  11   520485.27 1409.51
  -3  11   6 2310.58  459.84
  -3  11   745552.43 3078.26
  -3  11   8 6200.77  950.16
  -3  11   9 7707.78 1422.32
  -3  11  10 4037.27  699.46
  -3  11  1133297.30  421.96
  -3  11  1211717.61  192.34
  -3  11  13   31.20   28.12
  -3  11  14 3562.29  103.46
  -3  11  15 4268.48   88.22
  -3  11  16    2.01   24.64
  -3  11  17    2.34   24.69
  -3  11  18 4717.83  106.71
  -3  11  19 6263.80  127.99
  -3  11  20  254.23   29.45
  -3  11  21 2241.32   77.99
  -3  11  22 5168.57  122.12
  -3  11  2311319.11  180.98
  -3  11  24  599.92   44.33
  -3  11  25 6904.07  140.53
  -3  11  26 3767.65  112.82
  -3  11  27 8524.83  164.95
  -3  11  28  104.92   34.67
  -3  11  29 3727.54  113.15
  -3  11  30  630.16   48.67
  -3  11  31 1539.64   78.23
  -3  11  32    1.32   29.55
  -3  11  33  421.34   50.54
  -3  11  34  288.84   52.74
  -3  12  -2 9479.70  276.63
  -3  12  -1  458.27   77.81
  -3  12   0  318.75   91.92
  -3  12   121150.31 1453.35
  -3  12   2 9346.12  908.49
  -3  12   3  587.32  223.00
  -3  12   4 5791.22  299.92
  -3  12   510540.33  205.95
  -3  12   6 4258.67  154.15
  -3  12   7  147.64   29.82
  -3  12   811596.05  194.82
  -3  12   9 8811.67  147.56
  -3  12  10 6123.92  135.85
  -3  12  11 3771.96   75.53
  -3  12  12  294.05   33.76
  -3  12  13 4734.41  147.92
  -3  12  14 2466.56   89.75
  -3  12  15  122.99   35.71
  -3  12  16  286.03   35.32
  -3  12  17   30.99   28.07
  -3  12  18 3209.27  100.17
  -3  12  19  352.11   32.37
  -3  12  20 4316.08  106.47
  -3  12  21 7038.41  142.78
  -3  12  22 2981.54   96.02
  -3  12  23  217.79   38.21
  -3  12  24    0.28   32.35
  -3  12  25 2179.99   80.46
  -3  12  26 1621.59   74.08
  -3  12  27 1444.55   71.97
  -3  12  28 1536.68   66.26
  -3  12  29  154.59   28.84
  -3  12  30  705.59   55.33
  -3  12  31  287.79   44.11
  -3  12  32   57.57   31.96
  -3  12  33  153.45   83.07
  -3  13  -2  837.20   69.63
  -3  13  -1   51.50   33.18
  -3  13   0 3170.17  111.68
  -3  13   1 3333.97  115.34
  -3  13   2 3248.25  112.44
  -3  13   3 5830.09  136.86
  -3  13   4   78.79   32.54
  -3  13   518920.54  311.79
  -3  13   6  396.47   30.55
  -3  13   7   37.74   32.64
  -3  13   8  838.52   49.72
  -3  13   9  110.11   38.82
  -3  13  10   30.16   30.80
  -3  13  11   13.45   33.20
  -3  13  12 1926.94  112.90
  -3  13  1310198.68  237.08
  -3  13  14  801.65   75.69
  -3  13  15  215.77   35.90
  -3  13  16   84.07   34.25
  -3  13  17   84.63   35.73
  -3  13  18    0.09   35.16
  -3  13  19  718.31   52.38
  -3  13  20  198.08   33.84
  -3  13  21 5607.46  135.14
  -3  13  22  403.03   46.32
  -3  13  23  109.46   29.40
  -3  13  24  203.73   37.36
  -3  13  25   33.44   30.53
  -3  13  26  119.65   24.28
  -3  13  27  153.29   26.73
  -3  13  28    0.32   26.84
  -3  13  29   39.92   33.22
  -3  13  30  224.90   41.04
  -3  13  31  139.47   63.43
  -3  14  -2  111.69   30.20
  -3  14  -1 1210.33   67.88
  -3  14   0 2477.17   95.16
  -3  14   1 5304.90  141.42
  -3  14   2 1797.08   80.90
  -3  14   312729.34  213.53
  -3  14   413410.88  234.40
  -3  14   512081.29  220.18
  -3  14   6   70.05   34.77
  -3  14   7 1128.74   62.35
  -3  14   8 8099.55  187.14
  -3  14   9 1032.20   70.63
  -3  14  10 5287.09  173.06
  -3  14  11 7177.08  184.60
  -3  14  12   70.01   36.63
  -3  14  13    3.26   34.19
  -3  14  14  168.63   40.77
  -3  14  15 7756.80  175.62
  -3  14  16  549.72   51.74
  -3  14  17  114.00   37.71
  -3  14  18 1531.47   84.52
  -3  14  19 1420.58  101.83
  -3  14  20   37.25   46.01
  -3  14  21  829.65   84.99
  -3  14  22  668.65   57.32
  -3  14  23  373.12   49.36
  -3  14  24  115.87   32.94
  -3  14  25  141.06   34.67
  -3  14  26 1527.01   76.47
  -3  14  27  318.89   41.46
  -3  14  28    2.06   70.42
  -3  14  29    3.76   63.33
  -3  14  30  841.12  222.19
  -3  15  -2  135.80   35.90
  -3  15  -1 2194.91   94.41
  -3  15   0 2965.54  108.52
  -3  15   1  356.13   40.77
  -3  15   2 3337.41  116.57
  -3  15   318386.29  338.30
  -3  15   4 8877.76  202.61
  -3  15   5  322.08   45.66
  -3  15   6 6286.57  172.12
  -3  15   715746.09  271.27
  -3  15   8 2158.57   97.44
  -3  15   9 3790.84  125.97
  -3  15  10  283.65   43.76
  -3  15  11 2258.63  118.02
  -3  15  12 7509.07  205.43
  -3  15  13 4419.66  135.37
  -3  15  1410930.80  332.93
  -3  15  15  397.73   67.13
  -3  15  16  527.77   63.73
  -3  15  17  188.63   49.88
  -3  15  18  202.79   62.16
  -3  15  19  602.88   72.06
  -3  15  20 2067.64  139.02
  -3  15  21    2.85   42.63
  -3  15  22   11.54   37.64
  -3  15  23 2720.03  118.36
  -3  15  24   85.34   37.40
  -3  15  25 1444.60   95.73
  -3  15  26  431.16   65.91
  -3  15  27 1228.59  152.50
  -3  15  28  545.86   77.47
  -3  16  -2  254.34   37.67
  -3  16  -1 1074.20   66.69
  -3  16   0 1652.47   95.72
  -3  16   1   72.53   38.61
  -3  16   2 6662.04  173.51
  -3  16   3 2512.25  118.74
  -3  16   4   98.35   46.94
  -3  16   5 8371.54  205.54
  -3  16   6 2041.67   89.87
  -3  16   7 2956.84  120.77
  -3  16   8  229.18   43.07
  -3  16   9 6611.76  183.84
  -3  16  10 3583.00  138.20
  -3  16  11   36.38   46.54
  -3  16  1210981.40  370.28
  -3  16  13 2319.85  105.61
  -3  16  14 3520.80  151.89
  -3  16  15  185.03   49.58
  -3  16  16 6929.40  241.97
  -3  16  17  504.24   63.91
  -3  16  18   64.84   48.43
  -3  16  19   44.03   46.49
  -3  16  20   32.71   42.71
  -3  16  21  907.94   78.98
  -3  16  22  443.26   51.87
  -3  16  23  626.39   57.41
  -3  16  24   47.69   41.24
  -3  16  25 1927.02  204.54
  -3  16  26   52.75   43.10
  -3  17  -2    2.90   38.14
  -3  17  -1  381.80   59.47
  -3  17   0  262.17   47.91
  -3  17   1  723.12   52.36
  -3  17   2  223.20   36.59
  -3  17   3 1099.44   67.80
  -3  17   4  935.89   70.07
  -3  17   5  763.82   65.71
  -3  17   6 1098.18   83.58
  -3  17   7 1355.91  103.82
  -3  17   8    0.71   38.40
  -3  17   9 1082.88   69.09
  -3  17  10 2659.37  117.43
  -3  17  11 1204.19   81.58
  -3  17  12  135.56   47.07
  -3  17  13 7138.02  193.41
  -3  17  14 4914.61  231.78
  -3  17  15    0.50   38.39
  -3  17  16  298.71   50.44
  -3  17  17  160.27   45.22
  -3  17  18  133.33   38.67
  -3  17  19  101.52   36.60
  -3  17  20  395.36   46.75
  -3  17  21   88.19   46.07
  -3  17  22  103.31   36.21
  -3  17  23  221.50   45.56
  -3  17  24  336.12   66.85
  -3  18  -2  117.40   35.54
  -3  18  -1   55.22   31.00
  -3  18   0 1401.20   84.79
  -3  18   1  744.60   59.54
  -3  18   2    1.25   36.88
  -3  18   3   72.78   37.11
  -3  18   4  154.93   42.73
  -3  18   5   34.70   29.11
  -3  18   6    5.74   36.49
  -3  18   7    0.35   32.70
  -3  18   8  382.82   41.32
  -3  18   9    7.87   32.71
  -3  18  10  155.12   43.70
  -3  18  11 6169.07  182.26
  -3  18  12  618.55   56.13
  -3  18  13  160.73   42.43
  -3  18  14   25.21   40.21
  -3  18  15 1303.96   68.93
  -3  18  16    0.04   26.29
  -3  18  17  128.16   30.39
  -3  18  18    0.11   27.03
  -3  18  19  189.48   30.20
  -3  18  20    0.05   31.22
  -3  18  21  288.08   84.32
  -3  19  -2 1593.01   94.49
  -3  19  -1 1174.66  124.57
  -3  19   0  475.51   51.72
  -3  19   1  215.21   50.78
  -3  19   2 1183.60   72.10
  -3  19   3   36.25   25.45
  -3  19   4   71.80   29.65
  -3  19   5  159.79   43.36
  -3  19   6    7.52   36.51
  -3  19   7   62.94   41.48
  -3  19   8    1.44   42.87
  -3  19   9   44.11   51.60
  -3  19  10   19.31   43.30
  -3  19  11   17.71   44.38
  -3  19  12   77.27   32.44
  -3  19  13  485.21   47.50
  -3  19  14  129.64   44.76
  -3  19  15   74.59   44.81
  -3  19  16    8.70   26.93
  -3  19  17    1.14   42.33
  -3  20  -2 3944.18  228.21
  -3  20  -1  807.65   55.35
  -3  20   0  279.26   37.16
  -3  20   1  219.70   41.88
  -3  20   2   36.00   27.74
  -3  20   3  134.31   26.98
  -3  20   4   68.40   37.40
  -3  20   5  353.96   43.51
  -3  20   6  174.54   49.64
  -3  20   7  428.52   49.37
  -3  20   8  163.92   37.87
  -3  20   9    8.06   24.10
  -3  20  10   17.34   20.48
  -3  20  11    0.10   28.92
  -3  20  12    3.76   77.01
  -2   0   0 6016.11  590.88
  -2   0   2 4765.79  646.92
  -2   0   4 3472.91  100.00
  -2   0   632146.79  428.82
  -2   0   846289.35 1159.48
  -2   0  1071200.39 1692.65
  -2   0  12883286.311086.00
  -2   0  14122451.8 3792.00
  -2   0  16331870.8 6524.50
  -2   0  18   18.05  102.08
  -2   0  2011421.04  732.41
  -2   0  22  643.05  306.17
  -2   0  2443941.38 1834.88
  -2   0  26 4816.15  139.38
  -2   0  28    9.97   36.41
  -2   0  30  458.56   59.51
  -2   0  32 4180.76  164.73
  -2   0  34 4975.87  261.06
  -2   0  36 4489.13  185.29
  -2   0  38 4119.01  137.77
  -2   0  40   62.44   40.16
  -2   1  -130718.92 1512.50
  -2   1   022076.55  805.60
  -2   1   1   90.06  943.63
  -2   1   216278.14  269.35
  -2   1   3 1432.59  109.27
  -2   1   4  681.74  145.68
  -2   1   512169.19  305.74
  -2   1   6 5536.57  333.71
  -2   1   7 6747.15   91.64
  -2   1   821531.92  506.11
  -2   1   9146497.9 1221.95
  -2   1  1075986.16 1011.94
  -2   1  11 5405.52  264.86
  -2   1  1269537.06  926.88
  -2   1  13172529.7 1624.67
  -2   1  14278944.0 2390.34
  -2   1  1572203.03 1213.25
  -2   1  16 3517.22  344.89
  -2   1  1744940.16  894.10
  -2   1  1825117.88  699.24
  -2   1  19  260.75   58.55
  -2   1  20   31.30   87.26
  -2   1  21 1085.36  158.10
  -2   1  2230143.22 1371.29
  -2   1  2315325.28  912.56
  -2   1  24   52.04  100.31
  -2   1  25  248.20   30.01
  -2   1  26 2943.87   90.74
  -2   1  27 3598.06   89.20
  -2   1  28    8.50   23.36
  -2   1  29  160.27   29.17
  -2   1  30  387.12   41.77
  -2   1  31  914.07   54.26
  -2   1  32    9.77   30.30
  -2   1  33  392.32   33.62
  -2   1  34 2610.97  110.54
  -2   1  35 2960.67   91.01
  -2   1  36 2803.28   90.74
  -2   1  37  246.72   33.82
  -2   1  38  700.03   44.45
  -2   1  39  411.21   35.39
  -2   1  40    0.70   43.01
  -2   2  -160572.87  923.58
  -2   2   010285.05  828.72
  -2   2   1  646.31   54.26
  -2   2   2 8041.82 1293.36
  -2   2   321009.39  661.35
  -2   2   4 4863.04  340.65
  -2   2   5 4836.43   90.07
  -2   2   6 8262.15  267.92
  -2   2   726065.36  412.31
  -2   2   810257.77  362.59
  -2   2   9 7201.50  202.89
  -2   2  10  811.21   68.17
  -2   2  1161624.85  985.02
  -2   2  12 2777.42  132.62
  -2   2  1334614.69  523.51
  -2   2  14 3052.63  211.96
  -2   2  15134754.4 1585.83
  -2   2  16  496.89  141.51
  -2   2  17 4455.74  268.86
  -2   2  18    1.36  104.90
  -2   2  19 6406.16  344.01
  -2   2  20 1020.25  168.74
  -2   2  2122421.42  966.97
  -2   2  22  321.29  160.40
  -2   2  23 4074.99  533.68
  -2   2  24 1771.11  393.91
  -2   2  25 1665.18   64.48
  -2   2  26 3449.35   94.80
  -2   2  27    2.38   25.67
  -2   2  28  422.44   29.73
  -2   2  29  264.16   42.03
  -2   2  30 2174.96   73.99
  -2   2  31  265.28   37.26
  -2   2  32  981.96   61.87
  -2   2  33  314.26   28.65
  -2   2  34 1135.29   50.98
  -2   2  35   39.58   25.90
  -2   2  36  579.54   50.24
  -2   2  37 2011.87   80.97
  -2   2  38   19.94   34.38
  -2   2  39   86.96   21.09
  -2   2  40    1.24   29.21
  -2   3  -1  533.06  335.77
  -2   3   016300.58  264.49
  -2   3   1 2313.35   66.58
  -2   3   261002.66 2029.57
  -2   3   3 9695.25  494.57
  -2   3   423369.06  962.42
  -2   3   5216591.912535.00
  -2   3   628274.87  647.06
  -2   3   710155.12  368.83
  -2   3   8 1346.12   57.07
  -2   3   916849.76  388.21
  -2   3  10 7707.22  237.26
  -2   3  11 4237.98  149.12
  -2   3  12  982.60  127.17
  -2   3  13 5921.59  323.29
  -2   3  1410646.49  532.55
  -2   3  15 1023.26  189.94
  -2   3  1611253.20  391.99
  -2   3  17 1507.40  212.24
  -2   3  18  370.09  110.76
  -2   3  1925956.42  921.96
  -2   3  20 3703.74  308.69
  -2   3  2113668.57  945.19
  -2   3  2212708.98  932.31
  -2   3  23 5001.27  595.42
  -2   3  24 1389.24   81.42
  -2   3  25   54.87   22.39
  -2   3  26  995.96   56.02
  -2   3  27 6165.47  119.29
  -2   3  28  250.59   28.23
  -2   3  29  205.89   34.04
  -2   3  30 6297.13  159.03
  -2   3  31 7464.53  144.66
  -2   3  32 1070.73   63.50
  -2   3  33  628.55   53.78
  -2   3  34 1429.32   68.69
  -2   3  35   85.66   32.04
  -2   3  36  968.11   47.89
  -2   3  37  274.47   38.33
  -2   3  38  235.57   30.90
  -2   3  39   15.98   41.32
  -2   3  40    0.17   20.00
  -2   4  -1 2241.31  147.00
  -2   4   0  528.46   58.15
  -2   4   175591.14 2227.25
  -2   4   218072.37  870.30
  -2   4   312637.18  430.24
  -2   4   4127604.9 2008.50
  -2   4   553628.25 1228.39
  -2   4   679908.62 1599.11
  -2   4   7 9605.58  161.19
  -2   4   8107581.9 1873.98
  -2   4   9    1.63  232.93
  -2   4  1012909.05  358.08
  -2   4  11 1884.76  185.90
  -2   4  12 7488.45  555.18
  -2   4  1310686.17  530.10
  -2   4  14 1394.68  315.99
  -2   4  15 4271.08  272.08
  -2   4  16  876.10  130.40
  -2   4  1714924.73  592.14
  -2   4  18 4897.27  492.54
  -2   4  19 2584.20  268.03
  -2   4  2040353.51 1967.20
  -2   4  2115394.98 1127.80
  -2   4  22 1401.38  404.67
  -2   4  23  833.30  174.34
  -2   4  24   58.53   23.94
  -2   4  25   37.25   41.27
  -2   4  26  525.64   29.42
  -2   4  27  175.24   35.38
  -2   4  2816370.07  232.08
  -2   4  29 4806.42  126.27
  -2   4  30 3210.81   95.22
  -2   4  31 1562.09   72.54
  -2   4  32 5893.73  131.94
  -2   4  33  413.57   46.53
  -2   4  34  508.44   43.89
  -2   4  35 3150.42   92.05
  -2   4  36  218.34   28.71
  -2   4  37   21.85   30.48
  -2   4  38   96.82   22.04
  -2   4  39  662.29   36.20
  -2   4  40  121.35   32.83
  -2   5  -1274068.311418.50
  -2   5   0 2373.90 1242.26
  -2   5   122002.74  857.03
  -2   5   2   40.12  132.65
  -2   5   311764.19  445.39
  -2   5   472690.86 1392.82
  -2   5   5 9014.05  482.18
  -2   5   664203.27 1515.31
  -2   5   7 8322.84  469.87
  -2   5   844306.14  921.86
  -2   5   918756.88  556.70
  -2   5  1024705.82 1025.11
  -2   5  11  407.54  104.20
  -2   5  12 1260.16  221.11
  -2   5  13 3309.97  468.58
  -2   5  14 4393.40  327.29
  -2   5  15 5443.03  535.19
  -2   5  16 2596.66  442.17
  -2   5  1730050.45 1513.98
  -2   5  1824906.27 1486.83
  -2   5  19 9181.09  966.15
  -2   5  20 2021.38  486.51
  -2   5  2113722.40 1219.29
  -2   5  22 5652.55  827.70
  -2   5  23  385.50   38.52
  -2   5  24  758.88   34.99
  -2   5  25 2601.84   77.52
  -2   5  2612692.76  184.84
  -2   5  27 5553.93  111.65
  -2   5  28 4781.06  121.92
  -2   5  29  490.80   42.14
  -2   5  3012141.66  192.73
  -2   5  31 2208.64   94.63
  -2   5  32 5186.98  142.87
  -2   5  33 1609.11   90.48
  -2   5  34  317.08   39.19
  -2   5  35  139.01   25.41
  -2   5  36  149.44   28.00
  -2   5  37 1609.53   75.90
  -2   5  38  314.92   26.02
  -2   5  39   64.03   28.68
  -2   6  -1100309.2 7835.50
  -2   6   095857.37 2675.82
  -2   6   132616.46 1732.26
  -2   6   250421.01 2005.08
  -2   6   343808.07 1870.39
  -2   6   413788.66 1050.43
  -2   6   5    0.91  183.49
  -2   6   611597.51  653.27
  -2   6   752970.23 1299.98
  -2   6   8 2672.60  237.35
  -2   6   9  180.09   71.36
  -2   6  10  351.58  260.67
  -2   6  11 2349.89  631.15
  -2   6  12 1422.71  121.60
  -2   6  13 2203.48  489.93
  -2   6  14 4570.89  650.64
  -2   6  15  657.08  154.55
  -2   6  16 1306.58  349.87
  -2   6  17 1174.31  181.09
  -2   6  1815865.15 1110.82
  -2   6  1922766.16 1466.22
  -2   6  20 1369.82  280.48
  -2   6  21 2346.04  488.78
  -2   6  2219815.67  289.50
  -2   6  23 5579.25  114.81
  -2   6  24  783.02   48.85
  -2   6  2510485.40  155.26
  -2   6  26   69.25   30.97
  -2   6  27  656.81   48.42
  -2   6  28 7319.13  150.10
  -2   6  2919496.59  242.87
  -2   6  30  504.08   46.44
  -2   6  31   40.91   35.64
  -2   6  32  921.09   58.70
  -2   6  33 2580.41   88.30
  -2   6  34   78.58   24.52
  -2   6  35   91.70   22.08
  -2   6  36  557.82   39.07
  -2   6  37  775.50   40.69
  -2   6  38   98.86   27.85
  -2   6  39  272.79   44.69
  -2   7  -1 3007.01  343.66
  -2   7   020301.03 1311.14
  -2   7   127224.86 1629.96
  -2   7   221239.11 1565.17
  -2   7   3    3.90  177.66
  -2   7   4 1627.23  381.90
  -2   7   527764.48 1648.70
  -2   7   6  229.80  189.77
  -2   7   7 5668.29  459.30
  -2   7   8  986.93  184.20
  -2   7   9 9330.15  635.94
  -2   7  10  457.94  293.31
  -2   7  11 7039.74 1054.09
  -2   7  12    0.29  264.82
  -2   7  1322230.81 1971.23
  -2   7  14  182.36  277.38
  -2   7  15  165.94  328.44
  -2   7  1610643.89 1253.05
  -2   7  17  155.60  149.21
  -2   7  18   11.10  176.92
  -2   7  19 2880.59  498.30
  -2   7  2012037.59 1079.34
  -2   7  21  450.83   35.61
  -2   7  22  157.13   21.51
  -2   7  23  281.45   31.69
  -2   7  24 2372.02   77.86
  -2   7  25 1553.50   82.21
  -2   7  26   28.56   25.37
  -2   7  2712994.87  203.29
  -2   7  28 1699.65   70.67
  -2   7  29  648.18   52.59
  -2   7  30   84.14   37.01
  -2   7  31 6348.48  130.16
  -2   7  32 1475.32   61.27
  -2   7  33    1.06   30.19
  -2   7  34  138.56   27.68
  -2   7  35  780.51   53.81
  -2   7  36    4.30   34.53
  -2   7  37  282.63   53.26
  -2   7  38    8.11   31.07
  -2   8  -148262.91 2357.18
  -2   8   011768.92 1192.57
  -2   8   1   10.11  180.81
  -2   8   2 1660.14  515.99
  -2   8   3 1202.76  246.17
  -2   8   4  189.39  168.90
  -2   8   5 6887.88  632.99
  -2   8   6 7936.84  605.99
  -2   8   7  605.70  226.34
  -2   8   8 6032.80  691.93
  -2   8   9 1196.37  540.59
  -2   8  1010851.16 1321.60
  -2   8  11 3812.97  714.65
  -2   8  12  594.50  473.23
  -2   8  13 3149.51  701.87
  -2   8  14  162.37  180.79
  -2   8  15 1197.73  363.48
  -2   8  16 7703.75 1229.81
  -2   8  17 3932.77  818.79
  -2   8  18  138.97  282.43
  -2   8  19  278.93  233.01
  -2   8  20 5784.89  157.62
  -2   8  21 2311.37   77.47
  -2   8  22   13.91   21.11
  -2   8  23   22.00   27.30
  -2   8  24 1058.82   70.24
  -2   8  25   80.11   26.27
  -2   8  26  258.13   35.30
  -2   8  27   55.43   29.70
  -2   8  28 4240.81  122.71
  -2   8  29 1618.96   78.36
  -2   8  30 2389.70   99.48
  -2   8  31  398.49   40.24
  -2   8  32    0.80   24.10
  -2   8  33    9.18   29.03
  -2   8  34   35.68   23.35
  -2   8  35 1004.73   73.39
  -2   8  36 1959.32  110.94
  -2   8  37 1551.94  111.47
  -2   8  38 1287.37  166.96
  -2   9  -113754.73 1303.31
  -2   9   043284.27 2254.59
  -2   9   1 8016.38 1020.53
  -2   9   2 6172.27  963.14
  -2   9   329575.43 1983.08
  -2   9   4 4453.32  512.04
  -2   9   5  998.09  168.36
  -2   9   6 9004.70  831.11
  -2   9   7 9993.44 1083.00
  -2   9   8  713.54  387.83
  -2   9   9  179.54  286.60
  -2   9  10 8441.05 1098.91
  -2   9  11   45.00  183.64
  -2   9  12 8048.57 1148.01
  -2   9  13 2698.22  684.51
  -2   9  1436031.14 2483.42
  -2   9  15 7591.67 1120.57
  -2   9  16 2884.89  630.67
  -2   9  17 4536.67  983.16
  -2   9  18  155.58   26.47
  -2   9  19 5599.03  144.22
  -2   9  20   16.61   25.14
  -2   9  21 7171.43  150.09
  -2   9  22 2229.34   79.29
  -2   9  23 1585.98   60.14
  -2   9  24    4.54   27.12
  -2   9  25 4454.02  117.33
  -2   9  26 1436.53   65.18
  -2   9  27    1.15   26.06
  -2   9  28 1025.03   72.95
  -2   9  29   11.59   29.65
  -2   9  30 1357.13   77.13
  -2   9  31   26.19   28.59
  -2   9  32    0.34   26.60
  -2   9  33 1849.31   90.03
  -2   9  34 1046.05   63.70
  -2   9  35   77.84   30.77
  -2   9  36 2695.89  118.12
  -2   9  37 1134.76  271.24
  -2  10  -149385.99 2572.53
  -2  10   0 4217.96  761.32
  -2  10   155702.35 2842.84
  -2  10   218564.90 1652.03
  -2  10   3 1629.92  374.74
  -2  10   474373.97 2311.74
  -2  10   530501.45 1409.93
  -2  10   6  194.28  143.62
  -2  10   7 1315.70  516.56
  -2  10   8 4460.16  799.25
  -2  10   9   16.11  147.80
  -2  10  10 8352.99 1059.69
  -2  10  11 2689.36  704.96
  -2  10  12 5206.84  866.69
  -2  10  13   52.97  380.70
  -2  10  14 3758.51  873.48
  -2  10  1520020.09 1917.41
  -2  10  1615081.43  238.39
  -2  10  17 3780.37   85.70
  -2  10  1813798.27  203.23
  -2  10  1913291.26  203.16
  -2  10  20 3033.12   88.80
  -2  10  2115403.59  212.82
  -2  10  22 9850.95  154.72
  -2  10  23 6364.13  148.35
  -2  10  24 1791.23   83.60
  -2  10  25 2242.42   92.59
  -2  10  26 3161.26  101.28
  -2  10  27 2293.61   87.32
  -2  10  28    3.85   35.12
  -2  10  29  912.87   63.99
  -2  10  30  590.04   49.57
  -2  10  31  284.00   40.11
  -2  10  32  485.62   46.22
  -2  10  33   19.31   27.29
  -2  10  34  781.72   55.29
  -2  10  35  801.62   59.32
  -2  10  36   14.56   66.94
  -2  11  -1    7.00  337.53
  -2  11   032216.50 2324.42
  -2  11   1   18.38  142.00
  -2  11   273364.57 2320.10
  -2  11   3 2984.26  619.11
  -2  11   432745.99 2090.73
  -2  11   517407.09 1617.81
  -2  11   622162.90 1697.01
  -2  11   7 1420.76  395.90
  -2  11   8 9834.10 1181.62
  -2  11   9 8496.77 1095.02
  -2  11  10 1876.47  489.83
  -2  11  11  435.21  302.49
  -2  11  12 5538.72  961.17
  -2  11  1315961.95  226.14
  -2  11  14 2089.01   84.58
  -2  11  15  401.95   35.11
  -2  11  1632171.06  318.49
  -2  11  17 2386.08   64.88
  -2  11  18  471.09   25.57
  -2  11  19 1616.30   62.76
  -2  11  2033286.08  321.58
  -2  11  21  629.69   46.47
  -2  11  22  986.69   64.83
  -2  11  23 6048.16  143.78
  -2  11  2411872.78  198.26
  -2  11  25   21.64   36.72
  -2  11  26 2087.51   90.32
  -2  11  27 1655.71   82.22
  -2  11  28 1533.72   83.39
  -2  11  29   24.90   31.14
  -2  11  30  267.11   39.76
  -2  11  31 1460.09   79.64
  -2  11  32    0.62   29.47
  -2  11  33    9.20   23.95
  -2  11  34  881.51   61.72
  -2  11  35  251.33   67.93
  -2  12   8  439.17   50.93
  -2  12   9 2574.59  111.51
  -2  12  10    4.94   30.64
  -2  12  11  209.25   28.36
  -2  12  12  153.12   40.07
  -2  12  13 1148.81   65.31
  -2  12  14 7118.13  176.34
  -2  12  15  663.32   55.19
  -2  12  16    0.29   27.73
  -2  12  17 4133.05  114.75
  -2  12  18 9040.85  153.65
  -2  12  19 8347.70  150.18
  -2  12  20 1075.86   66.70
  -2  12  21  334.30   42.39
  -2  12  22 7935.14  176.61
  -2  12  23 4962.63  128.68
  -2  12  24   28.92   32.40
  -2  12  25    1.33   31.30
  -2  12  26  150.28   37.47
  -2  12  27    0.27   30.85
  -2  12  28  250.08   34.26
  -2  12  29 3685.38  115.86
  -2  12  30    0.24   25.08
  -2  12  31   31.58   26.88
  -2  12  32   97.07   27.85
  -2  12  33  519.30   52.65
  -2  13  -112735.09  238.02
  -2  13   0  486.92   28.84
  -2  13   1 3884.11  109.71
  -2  13   2  121.57   30.69
  -2  13   3    0.92   33.67
  -2  13   4 7868.83  165.90
  -2  13   5  863.36   46.55
  -2  13   615606.89  283.64
  -2  13   7 1554.05   93.85
  -2  13   8  183.56   31.78
  -2  13   9  633.22   67.58
  -2  13  10   16.53   32.51
  -2  13  11  205.16   37.69
  -2  13  12  367.82   31.48
  -2  13  13 1152.98   67.44
  -2  13  14 5002.61  133.24
  -2  13  15  667.56   69.59
  -2  13  16   33.93   33.16
  -2  13  17 1888.15   79.79
  -2  13  18  606.84   41.00
  -2  13  19  444.28   44.17
  -2  13  20   73.61   29.86
  -2  13  21  692.98   53.38
  -2  13  22 6293.96  151.94
  -2  13  23  817.83   59.59
  -2  13  24    1.98   34.22
  -2  13  25  208.05   41.58
  -2  13  26    0.64   36.16
  -2  13  27  367.23   44.16
  -2  13  28   93.88   30.70
  -2  13  29  574.99   44.96
  -2  13  30  262.78   50.37
  -2  13  31  169.29   32.35
  -2  13  32  268.59   59.30
  -2  14  -1 2306.83   91.83
  -2  14   0 5028.04  147.17
  -2  14   1  473.59   40.71
  -2  14   2 1581.98   64.92
  -2  14   3 1823.80   72.90
  -2  14   4 1292.00   72.42
  -2  14   5 1776.77   96.44
  -2  14   6 2457.66   96.53
  -2  14   7   71.69   40.87
  -2  14   8   93.84   37.72
  -2  14   9 1039.10   60.55
  -2  14  10  167.62   31.25
  -2  14  11 1251.24   67.33
  -2  14  12 4781.12  153.86
  -2  14  13 1242.33   81.31
  -2  14  14  250.50   45.98
  -2  14  15   88.66   32.66
  -2  14  16 2878.10  118.47
  -2  14  17 1451.58   96.46
  -2  14  18   20.62   37.01
  -2  14  19 2826.18  102.01
  -2  14  20 4716.23  142.38
  -2  14  21    9.37   31.02
  -2  14  22 2682.76   97.00
  -2  14  23 4996.60  131.55
  -2  14  24 1430.65   71.61
  -2  14  25    2.17   30.80
  -2  14  26  649.77   45.92
  -2  14  27 1518.50   60.91
  -2  14  28  135.24   24.59
  -2  14  29  392.22   38.34
  -2  14  30   40.69  248.86
  -2  15  -1  909.62   86.23
  -2  15   0 4099.47  159.45
  -2  15   1 1335.74   87.73
  -2  15   2 8126.53  196.52
  -2  15   3 1610.45   89.39
  -2  15   4 6849.56  188.67
  -2  15   5 2634.49  107.36
  -2  15   6 4334.90  160.57
  -2  15   7    0.47   35.44
  -2  15   8  299.34   39.27
  -2  15   9 7130.34  168.30
  -2  15  10 1298.73   73.27
  -2  15  11  364.05   43.63
  -2  15  12 1289.87   76.79
  -2  15  1310841.24  218.34
  -2  15  14 1196.70   78.46
  -2  15  15 8372.97  233.72
  -2  15  16 1696.05   90.59
  -2  15  17   58.54   35.53
  -2  15  18    0.14   38.18
  -2  15  19  178.19   41.67
  -2  15  20 7259.63  175.70
  -2  15  21 9598.12  302.93
  -2  15  22  934.44   79.38
  -2  15  23 1191.20   79.43
  -2  15  24 5199.12  183.74
  -2  15  25  725.82   63.51
  -2  15  26   10.77   24.47
  -2  15  27    1.13   35.83
  -2  15  28  530.48  124.21
  -2  15  29   91.94   88.83
  -2  16  -1 2526.31  119.04
  -2  16   0 6133.71  206.19
  -2  16   1 1991.17  116.12
  -2  16   2 1226.58   80.15
  -2  16   3  429.82   45.74
  -2  16   4 2786.88   96.48
  -2  16   5  427.83   65.50
  -2  16   6 5802.17  181.09
  -2  16   7   21.12   39.50
  -2  16   8 1455.48   96.30
  -2  16   9 1146.28   82.58
  -2  16  10  122.69   38.47
  -2  16  1116737.34  412.14
  -2  16  12 1302.93   77.71
  -2  16  13 3873.88  138.39
  -2  16  14 1050.97   69.95
  -2  16  1510765.65  231.04
  -2  16  16  265.12   37.85
  -2  16  17   23.58   40.79
  -2  16  18 6962.45  224.17
  -2  16  19  204.12   45.85
  -2  16  20    5.98   44.95
  -2  16  21 2440.22  114.39
  -2  16  22 1810.89  102.60
  -2  16  23   21.69   29.59
  -2  16  24  235.72   57.35
  -2  16  25 1480.92  108.44
  -2  16  26  869.78   93.56
  -2  16  27   57.58   61.68
  -2  17  -1 1026.94   91.70
  -2  17   0 1228.91   81.60
  -2  17   1 1094.02   77.80
  -2  17   2   12.38   35.26
  -2  17   3 3088.16  127.20
  -2  17   4   21.01   43.04
  -2  17   5   51.14   40.66
  -2  17   6   89.41   40.03
  -2  17   7 2174.28   99.58
  -2  17   8 2506.66   99.57
  -2  17   9  996.66   71.47
  -2  17  10 1138.43   77.43
  -2  17  11  426.93   48.98
  -2  17  12  213.67   50.48
  -2  17  13 3850.23  144.65
  -2  17  14 6338.97  191.48
  -2  17  15  109.71   40.45
  -2  17  16  800.70   65.67
  -2  17  17 2358.92  112.23
  -2  17  18  254.14   42.04
  -2  17  19 1081.37   64.08
  -2  17  20  194.36   37.47
  -2  17  21  316.58   40.40
  -2  17  22 1180.64   88.11
  -2  17  23 1810.66   99.97
  -2  17  24    3.22   53.58
  -2  18  -1    0.40   40.07
  -2  18   0  948.26   75.99
  -2  18   1  208.87   42.73
  -2  18   2  102.41   34.24
  -2  18   3    0.58   37.07
  -2  18   4   41.31   39.92
  -2  18   5  634.77   61.77
  -2  18   6    0.42   35.76
  -2  18   7    0.99   36.15
  -2  18   8  235.95   44.58
  -2  18   9  304.75   40.30
  -2  18  10   47.69   34.92
  -2  18  11    3.01   37.49
  -2  18  12 4209.29  126.12
  -2  18  13    6.05   41.14
  -2  18  14 1104.50   70.80
  -2  18  15  536.69   43.22
  -2  18  16 1480.19   87.54
  -2  18  17  398.09   62.11
  -2  18  18   48.49   33.02
  -2  18  19  538.44   65.59
  -2  18  20  207.42   34.44
  -2  18  21  209.98   49.59
  -2  18  22   72.70   69.60
  -2  19  -1   41.11   42.60
  -2  19   0  538.94   49.44
  -2  19   1  532.25   56.69
  -2  19   2   23.21   34.96
  -2  19   3   93.18   30.79
  -2  19   4  392.40   54.23
  -2  19   5  570.29   72.32
  -2  19   6  672.56   52.00
  -2  19   7   76.01   36.53
  -2  19   8    0.21   29.21
  -2  19   9   62.06   34.92
  -2  19  10    9.08   36.42
  -2  19  11  371.31   42.73
  -2  19  12  192.31   33.64
  -2  19  13    3.59   29.42
  -2  19  14  394.50   39.61
  -2  19  15  357.14   34.71
  -2  19  16    1.82   29.59
  -2  19  17   72.87   27.99
  -2  19  18   37.08   53.99
  -2  20  -1 2009.13  202.75
  -2  20   0  278.00   39.91
  -2  20   1   15.82   40.89
  -2  20   2   42.52   27.82
  -2  20   3  315.64   53.72
  -2  20   4   29.28   46.66
  -2  20   5   22.58   49.15
  -2  20   6   19.76   29.88
  -2  20   7 4045.56  278.04
  -2  20   8  100.29   41.14
  -2  20   9  331.63   42.44
  -2  20  10    2.18   37.06
  -2  20  11  301.13   66.74
  -2  20  12   38.83   29.80
  -2  20  13   80.12   39.17
  -2  21  -1  119.20   32.34
  -2  21   0    8.28   30.15
  -2  21   1    3.98   37.34
  -2  21   2   14.45   35.39
  -2  21   3    0.14   55.94
  -2  21   4  436.39   65.16
  -2  21   5 2027.64  290.77
  -2  21   6  133.17   77.20
  -1   0   3277622.7 1180.73
  -1   0   5124883.8 6968.50
  -1   0   7147910.0 3381.00
  -1   0   942247.72  572.09
  -1   0  1140980.74  700.99
  -1   0  13160722.8 1683.24
  -1   0  1556658.96 1030.93
  -1   0  17  238.51  110.61
  -1   0  19 2343.45  310.60
  -1   0  21156517.4 5460.08
  -1   0  23  997.90  615.32
  -1   0  2562700.35  719.43
  -1   0  27  444.02   50.71
  -1   0  29  368.94   47.42
  -1   0  31   53.78   41.73
  -1   0  33  664.69   74.88
  -1   0  35   86.20   50.05
  -1   0  37  442.76   47.51
  -1   0  39  272.87   58.27
  -1   1   0133283.9 2998.85
  -1   1   2617200.1 1682.07
  -1   1   334787.83  533.58
  -1   1   413706.37  200.53
  -1   1   5124368.8  800.04
  -1   1   616854.86  270.18
  -1   1   749263.38  643.15
  -1   1   8  649.19   82.48
  -1   1   9 6622.44  130.44
  -1   1  1026534.33  438.01
  -1   1  1131422.15  646.22
  -1   1  12 1235.42   74.45
  -1   1  1321644.91  525.66
  -1   1  1424642.32  521.60
  -1   1  1537189.57  670.69
  -1   1  16   60.30   50.79
  -1   1  17  996.01  136.08
  -1   1  18  132.64   68.63
  -1   1  1912580.52  652.73
  -1   1  2023681.79 1468.42
  -1   1  21 2956.77  518.49
  -1   1  2219083.52 1526.19
  -1   1  2366110.19 2672.85
  -1   1  2425015.87 1685.33
  -1   1  25  673.25   52.16
  -1   1  26  430.92   38.21
  -1   1  27 1482.03   66.15
  -1   1  28   12.27   30.08
  -1   1  29  254.49   32.36
  -1   1  30   57.61   27.36
  -1   1  31 1020.61   58.87
  -1   1  32  288.64   34.68
  -1   1  33   91.05   31.31
  -1   1  34    8.52   32.54
  -1   1  35   49.55   32.65
  -1   1  36  208.07   32.54
  -1   1  37  268.40   28.51
  -1   1  38  259.01   30.72
  -1   1  39  111.40   29.17
  -1   1  40    0.37   21.41
  -1   2   0266684.0 2038.12
  -1   2   1 2079.00  276.08
  -1   2   2169609.1 1795.23
  -1   2   3 1957.99  532.35
  -1   2   4   65.62  385.91
  -1   2   512289.66  307.49
  -1   2   6 3003.72  145.35
  -1   2   7   69.76   52.96
  -1   2   824938.69  612.47
  -1   2   918210.91  501.58
  -1   2  10 2594.02  235.47
  -1   2  11  343.72  139.83
  -1   2  1214789.14  450.06
  -1   2  13 4894.74  182.06
  -1   2  14 4066.28  220.84
  -1   2  15  869.72   86.44
  -1   2  1636561.36  699.49
  -1   2  17 2397.49  197.76
  -1   2  18 2439.62  165.97
  -1   2  1913631.03 1054.58
  -1   2  2036090.70 1718.61
  -1   2  21  266.07  264.39
  -1   2  2233007.46 1408.74
  -1   2  23 5163.92  430.14
  -1   2  24 5800.81  586.89
  -1   2  25  215.21   41.94
  -1   2  26 1068.76   60.04
  -1   2  27 4308.23  118.12
  -1   2  28 1899.99   70.77
  -1   2  29   51.68   28.22
  -1   2  30 4631.61  111.06
  -1   2  31  426.31   50.08
  -1   2  32  254.80   36.48
  -1   2  33   58.55   30.94
  -1   2  34  923.98   58.83
  -1   2  35    0.57   25.33
  -1   2  36   61.98   28.17
  -1   2  37    9.18   29.66
  -1   2  38  170.56   34.80
  -1   2  39  283.19   52.72
  -1   2  40    6.46   28.18
  -1   3   0 1931.61  375.90
  -1   3   1  702.87   66.37
  -1   3   2 6225.95  407.96
  -1   3   3  324.43  207.66
  -1   3   423773.97  408.14
  -1   3   536610.08  175.93
  -1   3   6379642.2 3144.60
  -1   3   719606.96  861.95
  -1   3   8 2708.16  401.79
  -1   3   918838.92  451.42
  -1   3  1016622.16  355.65
  -1   3  11 2804.79  220.27
  -1   3  12 3538.44  293.08
  -1   3  13 2100.14  168.59
  -1   3  1412069.56  306.07
  -1   3  1510049.78  306.61
  -1   3  16 6939.45  290.41
  -1   3  17    9.13  108.57
  -1   3  18 5169.51  491.15
  -1   3  19    5.68  133.30
  -1   3  20  528.34  161.68
  -1   3  21 3074.11  447.41
  -1   3  2218930.27  988.49
  -1   3  23 5837.79  568.29
  -1   3  24  294.85   67.06
  -1   3  25 5325.44  123.55
  -1   3  26   16.84   32.88
  -1   3  27  376.06   34.50
  -1   3  28 7312.82  148.06
  -1   3  29  782.58   55.94
  -1   3  30  387.61   38.19
  -1   3  31 9628.23  220.48
  -1   3  3211366.99  273.81
  -1   3  33   16.73   36.32
  -1   3  34    4.17   28.47
  -1   3  35  392.75   40.10
  -1   3  36   16.25   31.46
  -1   3  37    5.25   27.19
  -1   3  38   22.57   24.17
  -1   3  39  280.47   36.31
  -1   3  40  172.60   25.87
  -1   4   018292.99  428.76
  -1   4   1  328.71  133.76
  -1   4   290748.92 2500.00
  -1   4   3183611.7 2939.00
  -1   4   420558.23  874.47
  -1   4   5140356.0 1665.98
  -1   4   6  601.86   94.38
  -1   4   7143817.4 1480.56
  -1   4   842302.26  701.63
  -1   4   950950.71  723.98
  -1   4  1021375.67  569.67
  -1   4  1112207.59  409.16
  -1   4  12 2264.74   80.88
  -1   4  13 2365.24  265.34
  -1   4  1413307.54  477.54
  -1   4  15  133.16   75.88
  -1   4  1615385.03  698.52
  -1   4  1716246.94  792.73
  -1   4  18  604.36  296.27
  -1   4  19    9.30  109.74
  -1   4  20 3607.18  405.77
  -1   4  21 4530.68  539.28
  -1   4  22   91.98  186.09
  -1   4  23    6.19  183.98
  -1   4  24  821.60   52.75
  -1   4  25 1812.55   78.64
  -1   4  26 1722.91   74.70
  -1   4  27  144.46   25.65
  -1   4  28 2843.03   93.47
  -1   4  2924538.92  468.03
  -1   4  30 7401.82  164.60
  -1   4  31 1126.82   64.00
  -1   4  32 1541.10   71.84
  -1   4  33 6183.38  161.03
  -1   4  34  439.56   38.83
  -1   4  35  228.20   31.02
  -1   4  36  610.48   55.25
  -1   4  37    0.44   22.06
  -1   4  38   25.31   27.22
  -1   4  39  404.78   35.65
  -1   4  40  130.26   42.42
  -1   5   092808.20 1155.53
  -1   5   131419.85  815.90
  -1   5   262520.70 1723.55
  -1   5   334001.28 1200.77
  -1   5   419100.08 1209.60
  -1   5   5174913.2 3185.50
  -1   5   6 4616.67  344.89
  -1   5   756378.55 1060.62
  -1   5   8 5641.69  707.06
  -1   5   931053.31  831.53
  -1   5  10 4397.76  148.36
  -1   5  11 7495.39  444.93
  -1   5  1227616.49  892.45
  -1   5  1310309.90  663.24
  -1   5  14  767.71  318.21
  -1   5  1512241.61  487.19
  -1   5  1625519.52  909.44
  -1   5  1716249.58  837.19
  -1   5  1810875.80  752.82
  -1   5  19  310.65  144.56
  -1   5  2013141.25  820.72
  -1   5  21  218.25  339.99
  -1   5  22 1734.96  418.19
  -1   5  23    6.76   37.52
  -1   5  24   95.90   29.46
  -1   5  25  238.05   30.06
  -1   5  26 1388.03   66.71
  -1   5  2710710.13  169.98
  -1   5  28 1635.38   88.76
  -1   5  29 3299.86  109.18
  -1   5  30 6453.15  157.37
  -1   5  31 6946.69  200.51
  -1   5  32  316.50   38.71
  -1   5  33 2623.55  104.00
  -1   5  34 3446.94  122.64
  -1   5  35    4.69   29.24
  -1   5  36   83.22   23.09
  -1   5  37   59.20   20.64
  -1   5  38  395.75   40.25
  -1   5  39  644.77   64.67
  -1   6   0  619.70   97.33
  -1   6   110903.46  438.41
  -1   6   2 3319.75  215.61
  -1   6   342459.62 1746.40
  -1   6   4112710.1 2016.31
  -1   6   5 3265.01  500.67
  -1   6   610629.08  605.96
  -1   6   7 3410.91  546.21
  -1   6   840352.33 1912.51
  -1   6   9 4025.90  761.30
  -1   6  10    0.66  128.18
  -1   6  11 2873.87  167.91
  -1   6  12 5338.42  475.38
  -1   6  13  286.59  183.26
  -1   6  14 7876.86  456.15
  -1   6  1548940.05 1613.69
  -1   6  1617252.11  971.60
  -1   6  17    1.68  221.08
  -1   6  1829450.86 1686.03
  -1   6  1928016.08 1601.65
  -1   6  20  177.42  194.74
  -1   6  21   96.52  336.49
  -1   6  22  857.78   55.44
  -1   6  23 7127.53  145.12
  -1   6  24  448.28   42.09
  -1   6  25  134.01   31.60
  -1   6  26 4415.86  116.93
  -1   6  27 1028.66   54.47
  -1   6  28 3359.85  102.97
  -1   6  29  795.96   56.98
  -1   6  30 4442.29  117.12
  -1   6  31 1439.92   74.83
  -1   6  32 1316.22   71.98
  -1   6  33    8.09   29.75
  -1   6  34    0.67   29.58
  -1   6  35  298.48   30.36
  -1   6  36  335.68   29.81
  -1   6  37 1228.22   99.63
  -1   6  38 2997.17  105.44
  -1   6  39   23.34   38.62
  -1   7   014108.86  564.29
  -1   7   1 3902.85  327.53
  -1   7   2  627.77  124.78
  -1   7   3  507.96   98.25
  -1   7   4 8148.95  585.73
  -1   7   5 1736.98  254.86
  -1   7   630521.41 1604.42
  -1   7   7  760.53  548.27
  -1   7   8 3288.45  556.00
  -1   7   9  693.56  421.78
  -1   7  10 2412.47  671.54
  -1   7  11   54.89  170.15
  -1   7  12  461.86  281.80
  -1   7  13 4675.97  618.84
  -1   7  1461969.28 1685.47
  -1   7  1511424.50  923.99
  -1   7  16 1578.60  484.92
  -1   7  1718516.71 1415.96
  -1   7  1821470.85 1460.10
  -1   7  19 4724.35  777.33
  -1   7  20  821.41  219.67
  -1   7  2116401.62  246.14
  -1   7  22    6.46   36.97
  -1   7  23  205.11   39.89
  -1   7  24  390.05   33.90
  -1   7  25 1074.97   68.49
  -1   7  26  155.61   36.40
  -1   7  27  237.64   42.86
  -1   7  28  850.98   62.09
  -1   7  29   58.12   29.59
  -1   7  30  121.15   30.98
  -1   7  31  179.27   32.77
  -1   7  32    0.67   25.82
  -1   7  33   85.73   24.49
  -1   7  34  146.32   24.98
  -1   7  35    6.74   24.80
  -1   7  36 3901.15  125.15
  -1   7  37  492.63   44.09
  -1   7  38   43.64   33.70
  -1   8   034371.92 1735.04
  -1   8   1 8152.81  861.86
  -1   8   2  337.26  219.05
  -1   8   3  111.33   92.52
  -1   8   4  661.51  153.10
  -1   8   5 8569.81  842.65
  -1   8   6 2435.74  423.81
  -1   8   718330.24 1362.34
  -1   8   8 1224.51  246.46
  -1   8   9  107.25  209.01
  -1   8  10   46.24  250.96
  -1   8  1113307.09 1293.96
  -1   8  12 3997.35  744.73
  -1   8  13 5026.07  841.77
  -1   8  14 1377.83  342.50
  -1   8  15 4067.02  926.43
  -1   8  1611273.13 1457.65
  -1   8  1738638.85 2586.39
  -1   8  18 1042.42  295.04
  -1   8  19    1.21  262.50
  -1   8  20 3593.23  129.53
  -1   8  21  538.78   62.93
  -1   8  22 3686.56  133.84
  -1   8  23 1363.65   82.86
  -1   8  24  245.63   40.57
  -1   8  25  513.85   58.25
  -1   8  26 2268.93   97.79
  -1   8  27  308.11   41.69
  -1   8  28   13.60   31.75
  -1   8  29   17.09   23.96
  -1   8  30  140.55   27.75
  -1   8  31  179.18   29.30
  -1   8  32  193.13   26.98
  -1   8  33  547.85   45.48
  -1   8  34  606.61   54.22
  -1   8  35  998.71   61.54
  -1   8  36  103.38   24.43
  -1   8  37 2191.99  108.95
  -1   9   010502.07 1068.69
  -1   9   151145.83 2426.10
  -1   9   2  535.41  118.55
  -1   9   3 1027.37  336.29
  -1   9   4 5733.77  755.52
  -1   9   512144.57 1116.55
  -1   9   6  195.59  122.14
  -1   9   7 2720.73  456.95
  -1   9   8 3866.27  668.57
  -1   9   9  541.07  280.86
  -1   9  10   89.33  256.71
  -1   9  11 7310.21  859.75
  -1   9  1222953.78 1872.75
  -1   9  13 9918.77 1204.91
  -1   9  14 4028.39  773.96
  -1   9  1542090.78 2679.13
  -1   9  1612189.84 1654.51
  -1   9  17 6363.82 1094.67
  -1   9  18 2121.27   95.61
  -1   9  19  886.06   53.89
  -1   9  20 1819.56  104.82
  -1   9  21  763.09   75.04
  -1   9  22  775.42   55.31
  -1   9  23 9223.95  177.74
  -1   9  24  361.69   34.88
  -1   9  25  109.21   35.16
  -1   9  26   18.63   31.95
  -1   9  27  770.34   55.50
  -1   9  28  706.58   55.09
  -1   9  29   28.34   29.51
  -1   9  30 1547.72   74.21
  -1   9  31    1.98   36.55
  -1   9  32    6.61   25.84
  -1   9  33  281.30   34.13
  -1   9  34 1987.68   81.16
  -1   9  35 1215.24   57.00
  -1   9  36   86.24   29.90
  -1   9  37 1903.09  203.23
  -1  10   056235.40 2001.20
  -1  10   1 5360.93  653.21
  -1  10   226231.75 1586.01
  -1  10   3 8174.62  986.37
  -1  10   4   14.71  125.71
  -1  10   5 6861.98  846.24
  -1  10   6   97.26  111.39
  -1  10   720526.49 1520.21
  -1  10   8 1766.45  453.20
  -1  10   9 2458.49  586.94
  -1  10  1033354.43 2029.69
  -1  10  11 2467.64  566.00
  -1  10  12 3617.44  796.35
  -1  10  1316137.93 1701.73
  -1  10  1423484.91 1958.24
  -1  10  1512980.90 1461.22
  -1  10  1623199.35  380.29
  -1  10  1728723.73  346.71
  -1  10  18 6739.20  139.82
  -1  10  1910548.22  166.27
  -1  10  20 3212.34  100.44
  -1  10  21 3353.18  119.17
  -1  10  22 4839.09  129.26
  -1  10  23  540.72   64.61
  -1  10  24  442.42   37.21
  -1  10  25 1468.29   67.82
  -1  10  26  194.86   32.65
  -1  10  27  305.57   42.24
  -1  10  28  410.02   37.20
  -1  10  29  495.04   44.25
  -1  10  30  334.37   34.96
  -1  10  31  366.96   39.90
  -1  10  32  979.09   64.28
  -1  10  33  901.62   65.25
  -1  10  34  154.97   22.48
  -1  10  35 1034.24  134.17
  -1  10  36 1120.86  100.56
  -1  11   5  222.25  145.89
  -1  11   620380.08 1460.24
  -1  11   7 1198.94  362.17
  -1  11   8 1139.56  414.86
  -1  11   9 8675.29  992.98
  -1  11  10 6960.19 1062.03
  -1  11  11 8383.70 1054.17
  -1  11  12    5.65  293.65
  -1  11  1347716.85  744.21
  -1  11  1419969.95  275.56
  -1  11  1515505.78  217.15
  -1  11  16  192.24   33.76
  -1  11  1746768.65  399.23
  -1  11  18 1734.88   85.35
  -1  11  19 2364.91  108.33
  -1  11  20  119.31   37.83
  -1  11  21 9943.08  191.00
  -1  11  22 2232.88  104.62
  -1  11  23  155.07   37.84
  -1  11  24 2223.31   93.15
  -1  11  25   47.47   37.08
  -1  11  26   95.79   30.09
  -1  11  27  178.63   34.35
  -1  11  28  378.98   43.81
  -1  11  29  859.04   52.33
  -1  11  30  829.91   54.06
  -1  11  31 1091.04   76.92
  -1  11  32 1707.08   85.08
  -1  11  33 1473.60  101.07
  -1  11  34   18.36   28.24
  -1  11  35  546.47   78.16
  -1  12   912172.12  309.62
  -1  12  10 5422.34  148.47
  -1  12  11 4644.36  123.27
  -1  12  12   15.48   27.87
  -1  12  13 2516.15   86.24
  -1  12  1411663.10  201.91
  -1  12  1521111.28  257.96
  -1  12  16 1588.30   72.11
  -1  12  17  152.04   28.59
  -1  12  18 7555.87  152.50
  -1  12  19 5983.48  134.17
  -1  12  20 1736.95   88.99
  -1  12  21 2515.16   94.93
  -1  12  22  230.25   35.23
  -1  12  23  922.56   57.17
  -1  12  24  942.18   65.58
  -1  12  25  795.74   60.59
  -1  12  26  141.72   35.92
  -1  12  27 1062.40   64.26
  -1  12  28 2269.57   90.89
  -1  12  29 1131.96   65.03
  -1  12  30 3495.08  118.85
  -1  12  31 1458.03   84.42
  -1  12  32  922.26   65.32
  -1  12  33   97.26   25.87
  -1  13   0 9062.49  194.06
  -1  13   1 2187.88  115.24
  -1  13   2 1735.31   97.88
  -1  13   3  849.17   54.58
  -1  13   4 1397.53   98.79
  -1  13   516032.96  336.51
  -1  13   6  417.31   49.57
  -1  13   7 7939.39  179.77
  -1  13   8   32.10   30.16
  -1  13   9 3232.72  110.10
  -1  13  10 2550.20   79.64
  -1  13  11  556.30   39.56
  -1  13  12 1143.31   58.92
  -1  13  13  855.22   63.90
  -1  13  14  832.38   55.31
  -1  13  15 1865.48   88.81
  -1  13  16 1513.28   80.47
  -1  13  17    6.61   28.40
  -1  13  18   41.31   24.74
  -1  13  19  231.34   41.25
  -1  13  20  163.69   32.93
  -1  13  21  242.48   33.84
  -1  13  22  267.03   37.49
  -1  13  23 6163.55  167.54
  -1  13  24 2300.23  100.05
  -1  13  25    8.84   33.79
  -1  13  26  301.89   44.28
  -1  13  27 1419.08   88.62
  -1  13  28  516.04   44.34
  -1  13  29  367.08   44.09
  -1  13  30  462.28   47.06
  -1  13  31 3248.14  132.87
  -1  13  32  595.64   52.18
  -1  14   0  998.56   81.60
  -1  14   1 1465.38   99.76
  -1  14   2   36.55   42.23
  -1  14   3   51.00   32.77
  -1  14   4  368.43   55.98
  -1  14   5  170.91   35.91
  -1  14   6   75.68   48.26
  -1  14   7 2729.94   98.79
  -1  14   8   15.14   38.94
  -1  14   9  354.53   36.62
  -1  14  10 1709.17   81.75
  -1  14  11  534.68   71.98
  -1  14  12    2.32   30.19
  -1  14  13  533.79   34.40
  -1  14  14 3228.30  122.57
  -1  14  15 1365.79   75.83
  -1  14  16  143.93   38.80
  -1  14  17   62.59   37.23
  -1  14  18 1020.78   74.47
  -1  14  19   21.97   37.64
  -1  14  20 4479.87  130.93
  -1  14  21 8502.80  243.93
  -1  14  22  242.04   34.50
  -1  14  23  786.09   52.90
  -1  14  24 2480.52   95.58
  -1  14  25  504.97   51.81
  -1  14  26   19.07   30.09
  -1  14  27  187.38   36.79
  -1  14  28   10.63   37.47
  -1  14  29 1190.12   48.62
  -1  14  30  385.71   39.61
  -1  15   0 1771.89  100.32
  -1  15   1  459.87   63.81
  -1  15   2 8007.90  228.92
  -1  15   3 1789.29   74.56
  -1  15   4 1475.73   91.31
  -1  15   5  368.19   48.90
  -1  15   6    0.81   40.85
  -1  15   7  252.40   59.78
  -1  15   8 1438.95   76.21
  -1  15   9 1276.39   56.00
  -1  15  10 1104.79   65.70
  -1  15  11  279.63   41.15
  -1  15  12  454.89   45.70
  -1  15  13 7117.57  174.00
  -1  15  14  459.18   50.21
  -1  15  15  442.12   49.67
  -1  15  16 3610.39  129.55
  -1  15  17 6196.66  199.33
  -1  15  18 1066.16   84.79
  -1  15  19 1170.80   70.10
  -1  15  20  711.60   52.60
  -1  15  21 4164.14  165.43
  -1  15  22 8240.06  213.95
  -1  15  23 2132.84   89.88
  -1  15  24 1399.23   72.64
  -1  15  25  920.21   56.95
  -1  15  26  145.98   39.03
  -1  15  27   54.69   27.74
  -1  15  28   11.90   38.86
  -1  15  29  105.33   96.37
  -1  16   020363.43  482.76
  -1  16   1 4376.52  157.87
  -1  16   2    7.66   40.60
  -1  16   3  237.23   47.50
  -1  16   4 4421.09  138.36
  -1  16   5 1236.18   73.85
  -1  16   6  139.13   39.89
  -1  16   7  382.12   48.01
  -1  16   8  550.19   50.23
  -1  16   9  360.84   37.09
  -1  16  10 1509.06   70.58
  -1  16  11 1807.94   80.29
  -1  16  12 3207.00  104.98
  -1  16  13 2550.22  103.21
  -1  16  14   11.04   33.98
  -1  16  15 3342.32  108.26
  -1  16  16 1780.04   81.02
  -1  16  17  143.43   32.19
  -1  16  18  483.40   43.35
  -1  16  19 6440.85  176.79
  -1  16  20 3365.78  137.33
  -1  16  21    2.99   30.17
  -1  16  22 2904.07  119.10
  -1  16  23  276.83   40.96
  -1  16  24 1068.75  135.03
  -1  16  25   40.70   45.02
  -1  16  26 1637.35  112.97
  -1  16  27    9.45   65.47
  -1  17   0  315.58   60.51
  -1  17   1 7573.50  213.58
  -1  17   2 5693.18  191.45
  -1  17   3  283.84   48.07
  -1  17   4  250.70   50.42
  -1  17   5   28.90   43.39
  -1  17   6  391.08   68.76
  -1  17   7  298.19   50.38
  -1  17   8  587.14   64.58
  -1  17   9  201.79   43.00
  -1  17  10  649.82   59.91
  -1  17  11 1478.14   78.07
  -1  17  12 2774.55  111.73
  -1  17  13  446.88   38.92
  -1  17  14 1334.25   69.36
  -1  17  15 1862.97   77.15
  -1  17  16  195.43   33.85
  -1  17  17  205.33   30.46
  -1  17  18   30.12   30.46
  -1  17  19   75.18   48.53
  -1  17  20  565.95   61.92
  -1  17  21   24.20   49.27
  -1  17  22  350.41   45.45
  -1  17  23 2694.97  150.38
  -1  17  24  660.04   91.58
  -1  18   0  217.91   43.09
  -1  18   1  550.05   57.53
  -1  18   2  169.34   39.68
  -1  18   3    0.28   29.51
  -1  18   4   55.67   32.41
  -1  18   5   28.62   40.54
  -1  18   6   27.51   37.53
  -1  18   7   99.37   44.95
  -1  18   8   44.33   48.03
  -1  18   9  401.16   57.03
  -1  18  10   99.76   40.86
  -1  18  11  328.58   46.56
  -1  18  12    5.04   36.63
  -1  18  13 3233.94  107.78
  -1  18  14  151.07   33.27
  -1  18  15 3201.91  196.79
  -1  18  16   14.46   32.04
  -1  18  17  465.57   41.61
  -1  18  18  111.65   34.04
  -1  18  19   18.73   35.90
  -1  18  20   21.05   44.81
  -1  18  21 1062.40  123.41
  -1  18  22  148.78   51.03
  -1  19   0    0.29   33.28
  -1  19   1  385.76   53.88
  -1  19   2   12.17   35.60
  -1  19   3  131.10   37.76
  -1  19   4  100.66   28.39
  -1  19   5 1022.75   65.73
  -1  19   6 1705.49   76.70
  -1  19   7  976.89   67.43
  -1  19   8  103.11   51.38
  -1  19   9   57.91   28.05
  -1  19  10   46.26   26.03
  -1  19  11    7.12   27.62
  -1  19  12  529.62   42.18
  -1  19  13  699.66   59.60
  -1  19  14  310.59   61.07
  -1  19  15  810.75   85.16
  -1  19  16  259.76   64.55
  -1  19  17   94.92   45.22
  -1  19  18  359.57   42.56
  -1  20   0  287.22   30.85
  -1  20   1    3.96   44.58
  -1  20   2  208.25   39.06
  -1  20   3   69.82   45.36
  -1  20   4 2461.53  126.94
  -1  20   5    0.47   31.09
  -1  20   6   59.36   43.68
  -1  20   7    1.91   37.45
  -1  20   8 4276.87  480.05
  -1  20   9    0.13   33.95
  -1  20  10  195.72   36.25
  -1  20  11   48.72   26.92
  -1  20  12    0.33   27.83
  -1  20  13    0.69   43.35
  -1  20  14    0.08   50.12
  -1  21   0    1.80   29.74
  -1  21   1  137.63   38.77
  -1  21   2  294.70   59.51
  -1  21   3    4.84   45.05
  -1  21   4   40.55   55.48
  -1  21   5 1474.58  155.69
  -1  21   6 3180.23  682.44
  -1  21   7  458.33   73.57
   0   0   4317776.7 2619.50
   0   0   6    0.05  165.83
   0   0   8166189.0 1341.90
   0   0  1011574.40  798.99
   0   0  1266903.65  987.54
   0   0  14 5301.07  337.87
   0   0  16  188.68  158.31
   0   0  1846782.33 1601.29
   0   0  2016332.28  967.26
   0   0  2294742.66 4379.43
   0   0  24 3792.94  911.35
   0   0  26 9907.44  261.60
   0   0  28  127.37   53.78
   0   0  30 9792.16  291.03
   0   0  32  673.34  105.17
   0   0  34 4534.54  191.63
   0   0  36  982.43   78.07
   0   0  38   13.50   32.90
   0   0  40   28.01   55.29
   0   1   150538.85 1746.48
   0   1   2 113225518529.00
   0   1   3239818.5 3310.50
   0   1   4 2728.89 1007.05
   0   1   547992.10  670.57
   0   1   6 5856.32  148.89
   0   1   7 3710.83  153.63
   0   1   837682.26  578.67
   0   1   939024.61  665.01
   0   1  1062256.30  812.00
   0   1  1143831.96  615.82
   0   1  12    1.77   44.87
   0   1  1310671.90  339.07
   0   1  14 9307.76  338.41
   0   1  1511574.47  362.77
   0   1  16 1058.07  154.78
   0   1  17 6720.81  417.14
   0   1  1813731.05  627.79
   0   1  19 4742.61  410.30
   0   1  2020203.22  952.88
   0   1  2111384.66  782.67
   0   1  22 4822.02  589.61
   0   1  2325661.16 1637.00
   0   1  2427271.38 1687.77
   0   1  25 5627.59  148.46
   0   1  26  410.98   30.84
   0   1  27  282.82   34.52
   0   1  28 1118.80   65.77
   0   1  29 3089.11  114.08
   0   1  30   45.18   30.98
   0   1  31  984.40   59.45
   0   1  32 6468.29  160.72
   0   1  33 7142.30  167.07
   0   1  34   64.11   35.33
   0   1  35  124.18   35.93
   0   1  36 1008.97   64.15
   0   1  37   36.86   24.75
   0   1  38  347.18   32.51
   0   1  39  997.34   60.15
   0   1  40    0.73   27.09
   0   2   0  154.48  157.72
   0   2   1211618.4 4401.00
   0   2   2 1910.56   37.20
   0   2   3144938.9 1192.10
   0   2   4 1641.13   33.91
   0   2   5 4431.96  282.68
   0   2   6 2769.18  292.28
   0   2   763273.95  877.78
   0   2   855148.38  818.79
   0   2   921470.73  323.03
   0   2  1010845.84  304.12
   0   2  11  831.25   95.61
   0   2  1224499.89  700.53
   0   2  13 6212.01  191.47
   0   2  1413902.65  689.72
   0   2  15 3577.20  414.04
   0   2  1612452.45  678.70
   0   2  17 1711.06  227.46
   0   2  1818108.03  821.80
   0   2  19 2988.20  325.84
   0   2  2022805.55 1085.07
   0   2  2122879.30 1062.08
   0   2  22 3189.84  500.75
   0   2  23 9560.86  957.14
   0   2  24 2191.31  540.77
   0   2  25 3701.40   98.84
   0   2  26  455.59   36.74
   0   2  27  335.85   42.17
   0   2  28   59.01   29.47
   0   2  29 3394.80  115.03
   0   2  30  484.23   43.56
   0   2  3111992.14  200.59
   0   2  32  845.66   57.85
   0   2  33 1502.27   73.19
   0   2  34  490.95   51.80
   0   2  35 2642.90   98.86
   0   2  36 2433.24   94.28
   0   2  37  191.35   32.87
   0   2  38  559.07   40.79
   0   2  39  772.10   58.27
   0   2  40 1478.23   87.75
   0   3   122315.69  668.25
   0   3   2  520.42  126.03
   0   3   3 4758.61  113.41
   0   3   421908.76  674.98
   0   3   5 7382.51  144.84
   0   3   680636.97 1293.54
   0   3   7213593.4 1958.37
   0   3   8 4161.29   78.52
   0   3   928554.09  523.34
   0   3  1038565.65  575.99
   0   3  11 1028.81  244.06
   0   3  12   50.98   70.37
   0   3  13  641.35   24.72
   0   3  1412350.31  690.94
   0   3  1517150.28  898.61
   0   3  16 1247.32  196.50
   0   3  17 5268.76  480.58
   0   3  1842969.06 1478.66
   0   3  19 6798.73  462.32
   0   3  2010735.24  741.43
   0   3  21 1726.36  482.34
   0   3  2212833.23  810.52
   0   3  23 9435.29  822.56
   0   3  24 1609.33   79.55
   0   3  25 1880.72   65.41
   0   3  26 1724.33   74.00
   0   3  27  665.18   48.67
   0   3  28 1771.26   85.23
   0   3  29 5173.99  125.44
   0   3  30  130.14   29.13
   0   3  31 4191.40  121.96
   0   3  32 3032.26   96.30
   0   3  33 3997.30  112.50
   0   3  34 1177.36   64.44
   0   3  35 1394.57   67.20
   0   3  36  178.58   35.08
   0   3  37  311.02   43.91
   0   3  38 1140.14   73.68
   0   3  39  526.38   40.59
   0   3  40  959.25  128.44
   0   4   014237.14  870.67
   0   4   117304.93  666.55
   0   4   2  748.14  241.25
   0   4   3 6108.88  314.04
   0   4   4201154.2 2078.44
   0   4   541708.48  836.25
   0   4   611237.41  452.80
   0   4   730959.84  636.14
   0   4   8129664.0 1505.30
   0   4   923946.44  637.41
   0   4  10   46.22  210.88
   0   4  1113644.71  262.14
   0   4  12 3579.26   65.79
   0   4  13 4666.03  350.46
   0   4  1418143.28  776.69
   0   4  15    1.44   85.08
   0   4  1630387.75  930.57
   0   4  1713427.44  666.64
   0   4  1844909.15 1191.59
   0   4  19 8423.94  553.32
   0   4  20 9986.71  646.31
   0   4  21 2339.48  332.72
   0   4  22  145.61  116.25
   0   4  2315166.48  954.86
   0   4  24 1717.69   77.53
   0   4  25 2774.78   87.43
   0   4  26 1729.36   63.59
   0   4  27 4164.01  113.33
   0   4  28  684.72   55.79
   0   4  29  527.17   57.07
   0   4  30 9963.83  207.60
   0   4  31 1209.54   70.21
   0   4  32   50.49   33.33
   0   4  33  705.27   52.05
   0   4  34 1215.03   65.00
   0   4  35   23.02   27.28
   0   4  36   39.13   23.89
   0   4  37  599.12   65.27
   0   4  38  867.39   52.87
   0   4  39  207.17   47.54
   0   5   1 9619.61  536.76
   0   5   244933.08 1231.52
   0   5   3 2124.27  341.51
   0   5   425017.38  692.95
   0   5   583174.89 1295.74
   0   5   6124009.7 1446.30
   0   5   7 1151.57  217.97
   0   5   817561.90  600.16
   0   5   9 9211.94  477.91
   0   5  10 2178.29  279.97
   0   5  11 6392.54  454.47
   0   5  12  298.24   68.86
   0   5  1374540.95 1256.70
   0   5  1435532.49 1076.60
   0   5  1520578.09  905.85
   0   5  1653430.63 1489.24
   0   5  17 5135.38  493.13
   0   5  1828612.18 1040.03
   0   5  19 6157.93  585.46
   0   5  2033135.26 1406.66
   0   5  21 1014.94  243.09
   0   5  22   70.76  117.07
   0   5  23 3820.43  141.73
   0   5  24  122.98   35.00
   0   5  25 8050.57  176.95
   0   5  26  238.69   32.41
   0   5  27 4950.49  121.53
   0   5  28 2089.17   86.69
   0   5  29   17.98   34.36
   0   5  30  800.70   52.30
   0   5  31 2193.62   80.49
   0   5  32 1528.75   66.56
   0   5  33   14.40   27.57
   0   5  34   72.83   30.86
   0   5  35  163.01   32.49
   0   5  36   56.40   31.32
   0   5  37  401.42   34.38
   0   5  38  519.58   40.32
   0   5  39   32.99   36.44
   0   6   0 2307.13  173.71
   0   6   1  542.85  157.35
   0   6   2 1056.02  231.27
   0   6   325017.95  833.36
   0   6   4 4895.71  417.93
   0   6   540776.99 1030.68
   0   6   619639.80  785.11
   0   6   720530.39  588.19
   0   6   8  891.61  241.20
   0   6   9 7776.26  494.83
   0   6  1051304.33 1125.00
   0   6  1110916.11  578.94
   0   6  12 4506.63  492.75
   0   6  1358288.31 1726.90
   0   6  14 1760.08  131.94
   0   6  1513997.91  604.48
   0   6  1655111.52 1436.45
   0   6  17102810.7 2551.05
   0   6  18 7704.10  482.89
   0   6  1916695.15  939.28
   0   6  20 7397.67  764.79
   0   6  21 4802.58  558.98
   0   6  22   19.11   40.29
   0   6  23  624.93   49.08
   0   6  24   65.34   76.88
   0   6  25 1467.10   68.62
   0   6  26 3450.85  100.58
   0   6  27  803.69   61.55
   0   6  28 2900.86  103.68
   0   6  29  958.60   65.70
   0   6  30    3.37   28.83
   0   6  31  253.14   38.37
   0   6  32 2053.94   81.42
   0   6  33  536.96   46.76
   0   6  34   14.49   27.06
   0   6  35  596.26   47.96
   0   6  36  206.22   31.74
   0   6  37   72.77   21.30
   0   6  38  255.01   39.40
   0   7   123072.28  860.38
   0   7   2 5780.17  407.51
   0   7   318065.71  760.62
   0   7   415758.78  712.87
   0   7   514536.90  789.71
   0   7   6 1803.63  187.56
   0   7   713737.43  745.56
   0   7   8 5355.52  434.66
   0   7   9  606.51  115.79
   0   7  10  169.16  111.08
   0   7  11 9788.96  648.83
   0   7  12 7821.28  469.95
   0   7  13 2562.26  415.15
   0   7  14 2383.52  280.26
   0   7  15126271.9 2543.23
   0   7  1620514.89  948.15
   0   7  17  149.47  219.70
   0   7  18 7950.10  872.31
   0   7  1930749.72 1718.23
   0   7  20 3846.38  477.93
   0   7  21  294.73   65.75
   0   7  22 5007.83  183.94
   0   7  23 6384.23  147.73
   0   7  24  113.64   51.41
   0   7  25 5193.01  159.59
   0   7  26    1.26   30.09
   0   7  27 5063.28  137.34
   0   7  28  107.63   33.41
   0   7  29 2013.75   89.04
   0   7  30 1809.15   84.64
   0   7  31   59.68   26.55
   0   7  32   28.89   24.41
   0   7  33  314.09   31.66
   0   7  34 1502.74   71.31
   0   7  35  206.21   29.66
   0   7  36  108.91   29.28
   0   7  37 1199.11   75.60
   0   7  38  449.18   53.45
   0   8   0 3431.79  422.83
   0   8   1 3992.84  482.49
   0   8   221533.53 1166.93
   0   8   3  984.26  166.00
   0   8   4 3844.55  321.98
   0   8   5  823.34   97.16
   0   8   6 1455.28  158.20
   0   8   7  144.23  124.31
   0   8   8 2021.72  269.96
   0   8   9   35.88  156.98
   0   8  10   23.13  105.87
   0   8  11 1210.34  396.47
   0   8  1218292.64 1561.45
   0   8  13 9278.43 1198.28
   0   8  1412839.99 1119.98
   0   8  15 1288.50  286.96
   0   8  16 5846.07  606.07
   0   8  1719822.24 1417.04
   0   8  1836297.77 2007.67
   0   8  19 1575.25  592.10
   0   8  20  563.03   53.00
   0   8  21  147.68   56.94
   0   8  22 5022.82  148.26
   0   8  23 8701.78  272.10
   0   8  24 6627.91  198.34
   0   8  25 4357.53  196.72
   0   8  2612005.82  301.63
   0   8  27 4032.97  120.09
   0   8  28   41.38   31.88
   0   8  29  317.13   35.92
   0   8  30 1604.91   76.44
   0   8  31  443.82   45.36
   0   8  32  140.06   27.20
   0   8  33    1.69   21.99
   0   8  34  346.78   30.36
   0   8  35    4.55   35.97
   0   8  36  455.75   44.12
   0   8  37  355.10   40.07
   0   9   1 1759.56  236.38
   0   9   258522.14 2014.24
   0   9   3 4537.68  580.33
   0   9   4  113.60  234.23
   0   9   514467.17 1072.04
   0   9   612568.29  987.11
   0   9   7 4357.67  728.41
   0   9   8    5.27  225.96
   0   9   941752.46 1988.76
   0   9  10    6.47  168.41
   0   9  11  258.04  189.99
   0   9  12 1215.14  476.47
   0   9  1322897.27 1729.44
   0   9  1411188.19 1020.77
   0   9  15  665.57  443.19
   0   9  1619259.10 1839.68
   0   9  17  381.15  325.09
   0   9  18 5348.50  205.08
   0   9  19  116.79   37.30
   0   9  20   47.96   46.24
   0   9  21 4962.74  149.41
   0   9  22 2932.50  126.02
   0   9  23 2693.12  124.94
   0   9  2430723.21  488.85
   0   9  25 2523.73  111.96
   0   9  26    3.00   33.22
   0   9  27 1119.29   78.48
   0   9  28 6323.06  159.40
   0   9  29 1019.92   70.34
   0   9  30    6.94   28.25
   0   9  31  872.72   55.87
   0   9  32   27.89   29.86
   0   9  33    0.33   24.82
   0   9  34    0.36   36.81
   0   9  35   37.48   26.30
   0   9  36  303.07   40.26
   0  10   5 2281.68  442.00
   0  10   615579.44 1297.46
   0  10   738098.39 2034.92
   0  10   836102.79 1923.67
   0  10   913008.59 1146.46
   0  10  1019088.75 1525.18
   0  10  1148650.44 2638.22
   0  10  12 5754.68  827.47
   0  10  13  235.96  370.89
   0  10  1410804.42  947.66
   0  10  1512834.96 1354.06
   0  10  16  230.80   57.86
   0  10  17 7692.46  179.56
   0  10  1810093.88  212.94
   0  10  19   24.83   42.76
   0  10  20  503.88   48.24
   0  10  21 4895.53  151.48
   0  10  22 8518.32  238.39
   0  10  23  128.00   38.97
   0  10  24 1348.15   84.18
   0  10  2510055.72  240.79
   0  10  26 4512.60  136.32
   0  10  27  142.10   39.77
   0  10  28 2364.08  100.57
   0  10  29  605.31   46.72
   0  10  30  711.39   48.07
   0  10  31 1253.11   68.72
   0  10  32    8.82   25.20
   0  10  33   11.30   23.77
   0  10  34  459.28   39.85
   0  10  35   32.14   29.12
   0  11  13 1263.32  162.03
   0  11  1418528.34  261.84
   0  11  1511935.42  209.46
   0  11  1612335.66  207.40
   0  11  17   76.97   28.77
   0  11  18  774.92   50.82
   0  11  19  280.63   47.40
   0  11  20   78.22   33.32
   0  11  21    1.01   30.68
   0  11  22 1965.46   99.80
   0  11  23 3389.33  129.25
   0  11  24   91.49   35.72
   0  11  25  792.54   66.16
   0  11  26 6778.32  172.58
   0  11  27   62.70   27.21
   0  11  28    0.49   31.79
   0  11  29 1965.30   77.82
   0  11  30  462.06   45.55
   0  11  31 1363.46   71.71
   0  11  32  246.19   31.65
   0  11  33 1770.68   82.69
   0  11  34  171.90   38.87
   0  12   9 8948.17  273.36
   0  12  1023506.70  375.12
   0  12  11 6377.17  177.08
   0  12  12  700.04   68.52
   0  12  13  805.67   60.41
   0  12  14 1820.41   86.18
   0  12  15 1905.50   93.48
   0  12  16 4360.34  142.46
   0  12  17 5894.76  169.81
   0  12  18   20.24   35.55
   0  12  19  489.85   53.14
   0  12  20  241.90   35.91
   0  12  21  215.14   44.92
   0  12  22  290.74   48.22
   0  12  23 1733.83  104.33
   0  12  24 1677.44   99.73
   0  12  25    0.45   26.70
   0  12  26   11.02   27.86
   0  12  27   38.14   31.43
   0  12  28  452.92   45.60
   0  12  29 2412.83  101.45
   0  12  30 2861.89  118.79
   0  12  31 3096.52  178.87
   0  12  32  128.25   29.45
   0  12  33  664.62   68.41
   0  13   1  222.90   57.70
   0  13   2 3604.50  151.11
   0  13   3  175.86   36.69
   0  13   4   99.98   40.37
   0  13   5 4153.23  154.75
   0  13   6 5771.96  174.50
   0  13   7    6.66   33.83
   0  13   8 2340.38  117.35
   0  13   9 1351.12   78.18
   0  13  10 6080.98  152.73
   0  13  11 3348.08  121.63
   0  13  12 1432.31   94.60
   0  13  13   30.64   33.35
   0  13  14  331.51   39.87
   0  13  15 3018.67  109.91
   0  13  16  247.41   33.98
   0  13  17   43.29   33.15
   0  13  18  105.96   36.96
   0  13  19  487.24   50.92
   0  13  20  747.09   59.65
   0  13  21   32.05   28.46
   0  13  22  527.87   44.59
   0  13  23  426.56   51.63
   0  13  24  377.52   44.99
   0  13  25  920.52   62.88
   0  13  26   77.98   29.72
   0  13  27    3.06   38.80
   0  13  28 5342.78  161.37
   0  13  29  571.08   55.20
   0  13  30    6.98   29.16
   0  13  31    6.27   27.84
   0  13  32 4613.17 1343.72
   0  14   017862.95  502.84
   0  14   1 6333.50  198.97
   0  14   2   67.06   36.53
   0  14   3  568.93   44.89
   0  14   4 1050.91   75.51
   0  14   5  225.96   32.39
   0  14   6 1230.65   85.26
   0  14   7 9228.37  255.25
   0  14   8 6444.78  187.77
   0  14   9  213.95   43.06
   0  14  10 6251.03  145.52
   0  14  11 9611.83  193.68
   0  14  12   90.59   29.48
   0  14  13  607.01   68.89
   0  14  14 2241.26   92.36
   0  14  15 4972.68  147.78
   0  14  16  733.31   57.35
   0  14  17    1.15   30.05
   0  14  18  166.67   31.14
   0  14  19  308.35   38.25
   0  14  20    3.45   28.68
   0  14  21 1206.40   67.60
   0  14  22 1567.98   76.22
   0  14  23    8.22   25.97
   0  14  24    2.70   27.65
   0  14  25   19.38   28.22
   0  14  26  140.83   34.56
   0  14  27   56.36   30.30
   0  14  28   16.50   28.12
   0  14  29  993.11   59.00
   0  14  30 2895.12  280.27
   0  15   1 4324.10  146.57
   0  15   2 6829.58  179.59
   0  15   316691.39  296.86
   0  15   4 1708.63   83.20
   0  15   5  781.27   78.71
   0  15   6  474.33   71.25
   0  15   7 1571.50   93.34
   0  15   817300.32  376.01
   0  15   9 5817.22  167.75
   0  15  10  991.72   78.60
   0  15  11 1205.43   63.20
   0  15  12 9503.86  210.55
   0  15  13  434.71   51.44
   0  15  14 2738.08  115.76
   0  15  15  177.52   34.83
   0  15  16 1068.79   72.38
   0  15  17 1258.11   71.23
   0  15  18  884.89   67.05
   0  15  19  644.52   51.91
   0  15  20  610.86   61.06
   0  15  21  393.46   46.90
   0  15  22   61.83   25.32
   0  15  23 2725.35   96.07
   0  15  24  807.05   49.74
   0  15  25  527.31   45.35
   0  15  26  233.78   28.19
   0  15  27   79.79   28.66
   0  15  28   32.27   29.52
   0  16   0 1924.15  147.12
   0  16   119250.77  355.02
   0  16   2  172.74   59.11
   0  16   3 2492.50  137.86
   0  16   4  327.77   55.28
   0  16   5  144.21   49.91
   0  16   611529.59  264.36
   0  16   7    1.24   48.31
   0  16   8  786.27   72.28
   0  16   9 1422.70   90.39
   0  16  10 4120.32  126.93
   0  16  11 2024.96  100.06
   0  16  12 3963.28  124.64
   0  16  13  472.70   51.87
   0  16  14 2161.95   91.25
   0  16  15  758.94   49.00
   0  16  16  285.06   35.91
   0  16  17    0.63   31.65
   0  16  18    7.86   35.44
   0  16  19  205.41   37.18
   0  16  20  535.41   49.05
   0  16  21 4632.32  142.61
   0  16  22   65.56   31.01
   0  16  23  600.81   48.85
   0  16  24  275.94   48.68
   0  16  25 1728.50  141.57
   0  16  26   18.33   52.60
   0  17   1 3096.36  167.69
   0  17   2 8384.06  311.93
   0  17   3 1211.45   84.03
   0  17   4 2105.06  106.72
   0  17   5 2515.21  111.41
   0  17   6   60.51   35.11
   0  17   7  387.54   53.91
   0  17   8   45.43   36.86
   0  17   9 1598.09   88.32
   0  17  10  654.69   57.66
   0  17  11  120.45   50.70
   0  17  12   40.66   32.55
   0  17  13  774.57   50.06
   0  17  14  193.53   29.36
   0  17  15    0.36   29.38
   0  17  16  190.64   40.00
   0  17  17   11.28   23.30
   0  17  18    0.84   28.67
   0  17  19  633.14   59.29
   0  17  20  216.33   34.89
   0  17  21   17.08   29.41
   0  17  22   20.43   46.81
   0  17  23 2228.59  233.43
   0  17  24 2679.29  178.99
   0  18   014276.75  553.99
   0  18   1    2.47   57.32
   0  18   2    2.29   57.26
   0  18   3  819.92   86.26
   0  18   4   52.83   32.66
   0  18   5  135.81   39.50
   0  18   6    0.37   38.64
   0  18   7  478.45   54.95
   0  18   8  139.70   40.47
   0  18   9   27.85   30.85
   0  18  10 1101.71   72.53
   0  18  11  153.83   37.13
   0  18  12   58.09   33.56
   0  18  13  184.95   35.90
   0  18  14  992.47   83.73
   0  18  15 1064.82   59.24
   0  18  16 1190.19   72.62
   0  18  17  274.22   39.62
   0  18  18  289.66   57.36
   0  18  19  273.15   64.23
   0  18  20  216.12   50.87
   0  18  21  131.07   50.98
   0  19   1    1.68   34.08
   0  19   2  596.40   55.18
   0  19   3  342.50   55.76
   0  19   4   21.96   37.84
   0  19   5  431.44   56.99
   0  19   6  388.10   57.73
   0  19   7  666.92   57.19
   0  19   8  361.10   39.47
   0  19   9  104.63   32.60
   0  19  10  215.33   38.59
   0  19  11   84.16   31.25
   0  19  12  320.73   38.81
   0  19  13 1860.98  129.74
   0  19  14   91.97   29.37
   0  19  15 1265.37  150.46
   0  19  16 1394.58  129.88
   0  19  17   49.18   42.01
   0  19  18   61.68   66.66
   0  20   0   66.57   57.59
   0  20   1   13.78   19.61
   0  20   2   38.34   33.74
   0  20   3  337.37   80.17
   0  20   4    0.18   31.90
   0  20   5 1346.12  102.08
   0  20   6   61.72   36.39
   0  20   7  499.25   62.01
   0  20   8   16.63   38.05
   0  20   9  736.04   90.44
   0  20  10  222.19   33.53
   0  20  11   78.61   28.85
   0  20  12  362.05   60.11
   0  20  13  989.88   84.50
   0  20  14  343.91  168.01
   0  21   1  236.82   36.00
   0  21   2  351.24   43.28
   0  21   3  165.44   48.39
   0  21   4    0.83   38.72
   0  21   5  318.73   64.12
   0  21   6  339.02  157.03
   0  21   7  798.08  101.78
   1   0   1 1488612 5005.25
   1   0   335282.01  184.96
   1   0   532578.41  912.66
   1   0   718788.75 1388.26
   1   0   9418150.7 3566.42
   1   0  1142011.92 1327.14
   1   0  1390227.28 2239.54
   1   0  1510038.33  763.19
   1   0  17  813.31  267.07
   1   0  19 3111.29  421.14
   1   0  21 9205.65  839.41
   1   0  2310565.03  911.32
   1   0  25  229.03   59.16
   1   0  27  233.34   73.04
   1   0  29  105.75   38.87
   1   0  3117388.27  485.78
   1   0  33  108.33   57.07
   1   0  35 4429.46  188.76
   1   0  37    1.57   55.33
   1   0  39  398.27   69.71
   1   1   128146.04  949.70
   1   1   296752.35  484.88
   1   1   393422.30 1529.94
   1   1   4  219.01  274.01
   1   1   568348.00  491.92
   1   1   6 3462.20   78.25
   1   1   784049.30 3757.25
   1   1   8153779.7 2699.03
   1   1   9 1261.22  101.85
   1   1  10 6023.59  380.14
   1   1  11121184.6 1635.29
   1   1  1244309.89  972.68
   1   1  13 4232.71  255.82
   1   1  14  140.86   74.17
   1   1  15 2315.62  291.64
   1   1  16 2855.89  305.88
   1   1  17 2872.77  292.73
   1   1  18 9918.82  546.60
   1   1  19 1800.54  226.73
   1   1  20  197.78   83.81
   1   1  21 1325.28  273.88
   1   1  22  612.88  133.57
   1   1  23  858.05  264.18
   1   1  24 8447.29  183.49
   1   1  25 5882.48  140.52
   1   1  26 2505.84   86.19
   1   1  27    1.16   25.99
   1   1  28  402.04   43.27
   1   1  29 3614.78  117.27
   1   1  30 5609.73  161.65
   1   1  31 1865.59   93.12
   1   1  32  349.94   50.82
   1   1  33 5275.59  161.01
   1   1  34 3591.52  131.84
   1   1  35  700.59   55.33
   1   1  36  540.34   49.85
   1   1  37  235.48   39.67
   1   1  38   28.73   24.89
   1   1  39  777.52   58.46
   1   2   1  560.38  145.90
   1   2   2102153.8  673.14
   1   2   3 4475.72  137.67
   1   2   438575.94 1173.48
   1   2   5 4873.45  305.41
   1   2   6263897.8 3456.50
   1   2   7121306.3 1698.35
   1   2   899968.28 1328.93
   1   2   9  611.15  165.28
   1   2  1065956.26  831.36
   1   2  1114049.93  439.98
   1   2  12 4916.79  361.70
   1   2  13 7188.09  402.17
   1   2  14 1026.11  139.97
   1   2  1519798.73  770.42
   1   2  16 4232.89  304.09
   1   2  17  944.99  142.59
   1   2  1810359.89  626.95
   1   2  19 3835.52  431.05
   1   2  20 1481.12  371.87
   1   2  21 3799.69  419.08
   1   2  22  362.60  181.59
   1   2  23  937.63  298.78
   1   2  24   10.67   36.51
   1   2  25    0.80   26.37
   1   2  26  504.77   46.93
   1   2  27  424.10   42.33
   1   2  28  649.82   49.44
   1   2  29 7645.39  152.52
   1   2  30 2109.21   85.89
   1   2  31   12.40   36.24
   1   2  32 4772.85  171.34
   1   2  33 9993.13  194.16
   1   2  34  931.95   73.29
   1   2  35  217.33   37.12
   1   2  36  660.36   56.79
   1   2  37 3907.55  193.82
   1   2  38  362.02   39.95
   1   2  39   39.75   27.82
   1   3   1    9.49   45.75
   1   3   257764.05 1016.65
   1   3   337550.58  899.57
   1   3   416029.05 1089.81
   1   3   549687.47 2251.55
   1   3   6   16.67   81.28
   1   3   7  718.99  185.67
   1   3   8110961.9 1818.06
   1   3   933544.31  734.41
   1   3  1044140.65  835.11
   1   3  11 3242.89  247.65
   1   3  12   73.05   81.14
   1   3  1347730.64 1292.31
   1   3  14 9216.80  524.48
   1   3  15 7193.41  630.08
   1   3  1652907.94 1594.24
   1   3  17   57.91  162.44
   1   3  1814374.89  785.74
   1   3  1969792.50 1942.56
   1   3  2050853.82 2219.26
   1   3  21 2190.87  414.67
   1   3  22 1910.88  299.05
   1   3  23 4479.61  707.26
   1   3  24 1249.25   62.73
   1   3  25  178.83   29.94
   1   3  26 1046.21   62.61
   1   3  27 1931.13   80.80
   1   3  28  486.01   40.41
   1   3  29 1234.64   58.38
   1   3  30  196.77   41.36
   1   3  31 6820.16  171.33
   1   3  32 3817.98  105.11
   1   3  33  795.07   57.79
   1   3  34   10.13   33.44
   1   3  35 5188.26  155.86
   1   3  36 1580.67   74.91
   1   3  37  603.17   39.90
   1   3  38  806.32   50.99
   1   3  39  701.45   88.60
   1   4   1 7996.64  441.80
   1   4   242520.02  958.18
   1   4   313314.57  450.11
   1   4   420322.58  340.36
   1   4   544352.80  823.31
   1   4   6 3763.57  296.58
   1   4   7  960.33  182.82
   1   4   817007.94  538.29
   1   4   913688.82  480.24
   1   4  10 7729.30  417.34
   1   4  11  457.64   80.38
   1   4  12 2723.85  206.14
   1   4  1328246.19  794.89
   1   4  14  246.88  101.92
   1   4  15    6.60  137.91
   1   4  1673001.42 2066.76
   1   4  17102646.3 2351.21
   1   4  1846046.52 1632.83
   1   4  1929028.51 1335.98
   1   4  2036558.75 1305.98
   1   4  2120278.37 1020.84
   1   4  22  108.84  124.54
   1   4  23  751.66   75.93
   1   4  24 1991.86   89.36
   1   4  25   98.20   35.97
   1   4  26   31.39   28.71
   1   4  27  199.97   43.81
   1   4  28 1191.58   55.53
   1   4  29    1.55   31.11
   1   4  30  197.03   38.86
   1   4  31  718.82   52.01
   1   4  32  574.46   45.30
   1   4  33   98.87   30.46
   1   4  34 2398.35   96.48
   1   4  35    0.32   30.33
   1   4  36  650.37   57.05
   1   4  37   45.11   31.43
   1   4  38  961.43   59.50
   1   4  39 1227.36  116.91
   1   5   127416.35  689.50
   1   5   215702.44  621.23
   1   5   3 3541.82  309.99
   1   5   454462.53  954.82
   1   5   528547.58  720.14
   1   5   654105.97 1076.34
   1   5   721113.77  716.31
   1   5   820762.30  729.48
   1   5   9  325.12  117.81
   1   5  10 1114.10  140.19
   1   5  11 6578.76  410.40
   1   5  12  412.69  135.75
   1   5  13 6491.80  319.68
   1   5  14  609.58   91.88
   1   5  1574139.78 1587.04
   1   5  1640803.03 1153.23
   1   5  1736911.52 1300.76
   1   5  1832314.16 1124.09
   1   5  1919291.97  944.68
   1   5  20 7731.12  662.93
   1   5  2118820.94  968.59
   1   5  2215537.79  310.00
   1   5  23 2056.71   96.98
   1   5  24  157.56   51.36
   1   5  25 1003.87   60.68
   1   5  26 3394.50   97.72
   1   5  27  788.75   59.54
   1   5  28   55.02   33.15
   1   5  29  446.99   53.30
   1   5  30   16.38   31.93
   1   5  31  448.61   43.78
   1   5  32   90.42   28.98
   1   5  33  308.84   37.24
   1   5  34   22.22   24.59
   1   5  35   36.80   27.64
   1   5  36  181.10   27.34
   1   5  37  142.97   31.21
   1   5  38   16.10   26.61
   1   6   1 2425.84  191.89
   1   6   243826.20 1052.72
   1   6   372977.92 1412.95
   1   6   4  657.16  161.44
   1   6   5 4183.93  288.47
   1   6   621545.34  738.56
   1   6   752665.40 1061.58
   1   6   8 5198.89  344.98
   1   6   9 6978.81  400.13
   1   6  10  811.94  198.32
   1   6  1139746.34 1070.14
   1   6  12 1130.47   99.60
   1   6  13 2018.70  220.62
   1   6  1446085.78 1107.94
   1   6  15 4360.42  574.77
   1   6  16 1282.45  184.82
   1   6  1720026.34 1133.74
   1   6  1867677.90 2134.74
   1   6  19 8225.06  614.80
   1   6  20  453.67  244.81
   1   6  21 2372.12  190.71
   1   6  22   21.81   29.61
   1   6  23   53.77   65.15
   1   6  24 8736.62  238.21
   1   6  2512458.09  240.10
   1   6  2616850.10  324.75
   1   6  27 2875.42  126.19
   1   6  28 3858.08  127.85
   1   6  29 1273.37   79.87
   1   6  30   12.36   31.28
   1   6  31  361.40   38.40
   1   6  32   50.78   28.05
   1   6  33  322.04   31.36
   1   6  34  485.97   41.90
   1   6  35  121.02   25.06
   1   6  36    4.45   24.96
   1   6  37  155.50   27.09
   1   6  38   29.09   23.55
   1   7   122715.59  698.32
   1   7   296172.66 1704.85
   1   7   3 3204.60  247.58
   1   7   4 2999.28  214.31
   1   7   560891.78 1544.66
   1   7   6   16.52  111.65
   1   7   7  778.19  197.92
   1   7   8  992.23  153.25
   1   7   924787.39  977.16
   1   7  10 1161.62   98.29
   1   7  11    0.04   83.10
   1   7  12 6427.98  472.88
   1   7  1312718.76  644.53
   1   7  14 7940.58  570.15
   1   7  15  374.53  213.05
   1   7  1631698.06 1451.16
   1   7  1711051.10  895.12
   1   7  18  720.67  356.80
   1   7  19    0.51  244.05
   1   7  20  265.10   38.89
   1   7  21   63.93   42.00
   1   7  22    2.89   35.50
   1   7  23  116.29   68.61
   1   7  2432704.66  786.45
   1   7  25 1356.85   97.06
   1   7  26 7627.16  206.75
   1   7  27 1108.28   71.94
   1   7  2812383.89  253.41
   1   7  29 1308.88   71.96
   1   7  30   72.58   31.06
   1   7  31 1889.74   89.45
   1   7  32   22.16   28.63
   1   7  33   62.99   24.69
   1   7  34 1455.91   64.54
   1   7  35 1153.36   66.26
   1   7  36  164.23   23.79
   1   7  37    0.51   27.02
   1   8   132706.24 1013.54
   1   8   2 3777.33  381.84
   1   8   3 3566.93  300.25
   1   8   4 4203.95  409.04
   1   8   549475.27 1381.73
   1   8   6 4362.15  503.80
   1   8   7  912.70  285.86
   1   8   8  626.53  308.54
   1   8   9 3326.26  691.06
   1   8  10 1491.87  319.49
   1   8  11  433.69  133.04
   1   8  12  609.89  284.37
   1   8  13   33.56  141.86
   1   8  14  115.87  155.46
   1   8  15 6989.20  696.16
   1   8  16 7960.33  731.52
   1   8  17   14.65  361.46
   1   8  18  693.69  169.60
   1   8  19 6641.37  162.07
   1   8  20 4108.53  101.76
   1   8  21 4343.68  150.79
   1   8  22 7658.96  174.89
   1   8  2324339.04  405.55
   1   8  24 5055.96  195.84
   1   8  25 7599.45  228.62
   1   8  2610241.97  254.01
   1   8  2711975.18  228.88
   1   8  28   66.37   37.64
   1   8  29   89.61   31.67
   1   8  30  798.03   64.09
   1   8  31   15.51   28.22
   1   8  32 1186.23   64.73
   1   8  33  416.84   35.03
   1   8  34    0.45   22.93
   1   8  35  999.74   60.71
   1   8  36 1327.79   64.91
   1   8  37    7.66   47.21
   1   9   1   44.76  209.23
   1   9   2 6515.61  937.89
   1   9   3107055.3 3490.56
   1   9   418093.73 1446.80
   1   9   5 2101.34  432.33
   1   9   617663.79  932.89
   1   9   7 6013.36  484.87
   1   9   8 4920.39  536.40
   1   9   9  102.44  112.99
   1   9  10 9106.72  760.36
   1   9  11 8265.38  557.97
   1   9  12  470.13  155.73
   1   9  13  361.44  346.43
   1   9  14  406.81  447.84
   1   9  15  764.44  883.59
   1   9  16  141.12  342.96
   1   9  17 1780.47   95.86
   1   9  1810094.53  281.36
   1   9  19    4.67   27.71
   1   9  20  644.61   48.35
   1   9  21 5224.40  150.21
   1   9  2210651.33  258.79
   1   9  23 9470.92  246.69
   1   9  24 1002.34   94.23
   1   9  2528955.03  503.27
   1   9  26 1419.04  104.99
   1   9  27  306.88   43.03
   1   9  28   58.73   33.96
   1   9  29 1631.43   88.84
   1   9  30    3.79   31.03
   1   9  31   23.37   24.15
   1   9  32  219.15   28.07
   1   9  33 3577.85  108.56
   1   9  34  159.31   25.45
   1   9  35   90.58   25.34
   1   9  36   22.90   49.18
   1  10   139853.01 2217.29
   1  10   2 8498.61  958.94
   1  10   378184.36 3273.60
   1  10   427268.53 1836.86
   1  10   510093.68 1155.98
   1  10   611684.73 1141.41
   1  10   724925.08 1775.56
   1  10   811405.92 1147.01
   1  10   933597.50 2109.70
   1  10  1017364.04 1420.39
   1  10  11 3091.58  652.41
   1  10  14 2169.02  854.96
   1  10  15  970.87   77.16
   1  10  16 1105.78   63.42
   1  10  17 4484.87  167.74
   1  10  18 1659.66   78.20
   1  10  19   53.48   34.19
   1  10  20 6262.48  186.33
   1  10  21 4447.71  172.27
   1  10  22 6002.19  181.86
   1  10  23 9402.05  202.57
   1  10  24 2286.05  112.53
   1  10  25   43.81   39.52
   1  10  26 5748.03  154.52
   1  10  27 2725.92  103.99
   1  10  28  194.76   35.98
   1  10  29  216.64   28.68
   1  10  30  587.72   46.10
   1  10  31 1184.55   68.68
   1  10  32  458.96   47.02
   1  10  33  173.85   32.35
   1  10  34  599.26   60.73
   1  10  35  570.31   48.92
   1  11  12 6235.46  427.03
   1  11  13   51.29   39.53
   1  11  14  167.70   31.21
   1  11  15   59.10   30.04
   1  11  16 7879.71  208.67
   1  11  17  115.82   41.05
   1  11  18    0.67   36.68
   1  11  19 9553.77  209.27
   1  11  20 1012.71   92.24
   1  11  21 2326.88  121.58
   1  11  22  523.15   61.68
   1  11  23 5189.39  210.98
   1  11  24 1235.77   86.71
   1  11  25  295.37   52.64
   1  11  26  405.93   53.02
   1  11  27 1503.47   72.73
   1  11  28   63.15   26.91
   1  11  29   88.81   25.67
   1  11  30 1105.24   69.49
   1  11  31  131.73   25.33
   1  11  32 1928.54   91.61
   1  11  33    0.88   28.74
   1  11  34  754.00   72.27
   1  12   812107.51  418.26
   1  12   9  836.71   81.58
   1  12  10 4755.27  149.51
   1  12  11 4765.48  131.62
   1  12  12  554.26   44.02
   1  12  13  769.35   70.02
   1  12  14 1802.49   82.08
   1  12  15 1035.06   79.91
   1  12  16 2543.05  107.60
   1  12  17  804.05   62.38
   1  12  1814644.07  243.53
   1  12  19 4175.11  143.76
   1  12  20  109.47   38.05
   1  12  21  259.81   47.94
   1  12  22 2170.85  102.15
   1  12  23  497.35   63.33
   1  12  24 1201.33   78.30
   1  12  25  969.00   75.04
   1  12  26    0.97   33.61
   1  12  27  499.18   47.08
   1  12  28   72.13   28.57
   1  12  29  209.98   36.10
   1  12  30  876.06   58.90
   1  12  31 1598.11   89.59
   1  12  32 1367.21   81.66
   1  13   1  897.73   57.05
   1  13   2  104.18   28.38
   1  13   3 2112.28  109.06
   1  13   4 1495.03   78.67
   1  13   5  864.26   68.59
   1  13   6 4147.71  139.82
   1  13   7 7251.54  167.00
   1  13   8  223.07   31.01
   1  13   9  294.15   50.43
   1  13  10 5110.51  181.28
   1  13  11 4878.55  137.57
   1  13  12 3213.07  128.81
   1  13  13   12.65   35.67
   1  13  14  505.72   65.55
   1  13  15 2139.02  103.49
   1  13  16 3455.66  119.73
   1  13  17 2114.97   91.74
   1  13  18 1226.25   82.00
   1  13  19 4257.46  139.40
   1  13  20 1392.55   88.32
   1  13  21 6621.19  183.54
   1  13  22   88.14   39.01
   1  13  23   75.97   34.40
   1  13  24  193.82   30.41
   1  13  25   66.98   26.25
   1  13  26    0.54   27.18
   1  13  27  193.48   29.42
   1  13  28  201.67   33.60
   1  13  29 2565.29  151.26
   1  13  30  711.89   81.59
   1  13  31  458.40   48.80
   1  14   1 7302.14  189.05
   1  14   2 4346.35  149.82
   1  14   3  144.36   38.25
   1  14   4  103.08   27.97
   1  14   5  152.12   43.77
   1  14   6 2596.75  127.99
   1  14   7 4850.66  157.27
   1  14   819708.81  414.98
   1  14   911964.69  291.41
   1  14  10  108.57   37.32
   1  14  11 4604.65  182.31
   1  14  12 7231.94  195.77
   1  14  13   14.05   37.33
   1  14  14  547.90   51.67
   1  14  15   41.86   31.39
   1  14  16  545.33   45.66
   1  14  17 2339.81   93.12
   1  14  18 2484.19   97.50
   1  14  19 5662.78  151.11
   1  14  20   60.60   32.35
   1  14  21  506.79   46.53
   1  14  22   58.19   28.33
   1  14  23  410.11   36.82
   1  14  24   82.87   28.99
   1  14  25   35.51   25.81
   1  14  26  743.18   54.68
   1  14  27  322.85   40.09
   1  14  28  526.97   52.45
   1  14  29    8.97   23.31
   1  14  30 1166.42  447.36
   1  15   1 6221.84  197.47
   1  15   2 2077.60  114.28
   1  15   3 1825.24  125.09
   1  15   4 5545.82  214.26
   1  15   512241.12  348.83
   1  15   6 7778.61  223.99
   1  15   7  440.49   68.32
   1  15   8 5538.20  226.02
   1  15   920010.18  448.03
   1  15  1011999.37  293.26
   1  15  11  803.89   78.23
   1  15  12 5375.70  175.61
   1  15  13 4143.55  134.64
   1  15  14    4.00   31.45
   1  15  15    3.59   30.26
   1  15  16   64.87   32.26
   1  15  17  558.36   45.34
   1  15  18  102.13   30.05
   1  15  19   36.18   29.69
   1  15  20 1369.46   73.15
   1  15  21  615.24   54.30
   1  15  22   89.14   27.98
   1  15  23  397.41   39.06
   1  15  24   43.70   23.29
   1  15  25    1.82   25.51
   1  15  26  268.53   39.34
   1  15  27  551.15   66.81
   1  15  28  505.50   73.59
   1  16   1 2200.03  160.64
   1  16   2 1469.83  109.47
   1  16   3 7748.69  243.59
   1  16   4 1731.86  141.47
   1  16   5  457.20   67.54
   1  16   6 3699.21  177.89
   1  16   711924.76  352.89
   1  16   8 2470.12  121.36
   1  16   9  183.69   44.41
   1  16  10 8108.15  336.14
   1  16  11  520.25   54.66
   1  16  12    4.84   32.80
   1  16  13  287.93   44.70
   1  16  14 2610.23  117.34
   1  16  15   64.04   32.02
   1  16  16    3.95   35.13
   1  16  17  718.88   64.64
   1  16  18  204.33   38.07
   1  16  19  867.85   69.59
   1  16  20  287.49   40.96
   1  16  21  180.40   32.72
   1  16  22  599.63   45.53
   1  16  23   80.15   38.58
   1  16  24   52.53   32.41
   1  16  25  260.77   58.32
   1  16  26  554.38  111.64
   1  17   1  353.50   48.03
   1  17   2 4918.92  178.37
   1  17   3 4511.73  189.54
   1  17   4  238.29   64.92
   1  17   5 2264.87  181.17
   1  17   6 1105.34   86.58
   1  17   7  689.61   67.80
   1  17   8 2701.68  115.92
   1  17   9  359.50   48.10
   1  17  10  142.79   36.59
   1  17  11 1970.80  103.40
   1  17  12 1294.66   78.37
   1  17  13 1226.48   81.62
   1  17  14 1239.72   78.48
   1  17  15  111.24   29.58
   1  17  16    7.36   27.86
   1  17  17  277.37   42.73
   1  17  18 1588.72  103.06
   1  17  19  159.83   26.85
   1  17  20  230.08   52.19
   1  17  21  230.84   35.16
   1  17  22  401.91   51.63
   1  17  23  141.49   85.16
   1  17  24  421.19   84.44
   1  18   113345.26  307.04
   1  18   2  716.66   73.22
   1  18   3  583.95   67.62
   1  18   4  834.69   86.38
   1  18   5  105.85   40.23
   1  18   6   31.68   36.64
   1  18   7   74.94   39.17
   1  18   8  133.87   37.09
   1  18   9  616.44   62.01
   1  18  10   78.25   31.13
   1  18  11  797.51   57.72
   1  18  12 3682.77  147.37
   1  18  13  143.90   31.61
   1  18  14    5.71   29.03
   1  18  15   61.05   28.60
   1  18  16 4639.58  211.71
   1  18  17  131.98   26.88
   1  18  18    6.85   22.12
   1  18  19   49.91   37.14
   1  18  20  377.03   60.21
   1  18  21  348.01   66.90
   1  19   1  526.09   56.39
   1  19   2  128.59   52.16
   1  19   3 1503.44  106.08
   1  19   4  986.65   80.20
   1  19   5  247.68   41.81
   1  19   6    5.80   34.04
   1  19   7   12.12   33.74
   1  19   8  404.40   46.95
   1  19   9  313.16   45.35
   1  19  10  941.33   71.28
   1  19  11  194.89   35.76
   1  19  12   24.98   29.32
   1  19  13 1269.62  103.82
   1  19  14 2653.14  191.66
   1  19  15    0.39   23.44
   1  19  16  183.87   32.48
   1  19  17  532.38   90.32
   1  20   1   40.53   27.41
   1  20   2  531.33   55.54
   1  20   3    3.80   30.87
   1  20   4   35.42   35.36
   1  20   5   19.35   31.55
   1  20   6   26.81   40.88
   1  20   7  753.47   79.47
   1  20   8   10.17   26.63
   1  20   9    3.32   31.74
   1  20  10    1.68   26.55
   1  20  11  556.54   78.19
   1  20  12  147.74   34.86
   1  20  13  212.78  105.49
   1  21   1    0.76   25.86
   1  21   2    0.26   24.76
   1  21   3    0.38   33.50
   1  21   4  158.56   77.84
   1  21   5    0.06   62.64
   1  21   6    1.59   31.26
   2   0   260986.53 2006.10
   2   0   4 1678.36  133.68
   2   0   6322554.9 4429.23
   2   0   8  277.72  238.06
   2   0  10153397.0 7284.50
   2   0  12 1424.18  362.75
   2   0  1458688.49 1887.37
   2   0  16  658.13  249.61
   2   0  1830979.92 1608.00
   2   0  20 7305.59  793.87
   2   0  22 1055.67  313.71
   2   0  24 1259.14   88.83
   2   0  26  137.07   62.89
   2   0  28   31.11   46.63
   2   0  30   31.96   54.50
   2   0  32 1785.46  136.72
   2   0  34   43.03   50.45
   2   0  36  796.61   69.08
   2   0  38    1.04   49.17
   2   1   2 3738.85  265.01
   2   1   3 2140.11  234.08
   2   1   4 6393.48  568.66
   2   1   552987.32 1272.32
   2   1   612986.92  721.90
   2   1   731357.31  893.67
   2   1   8113686.2 1406.83
   2   1   973865.38 1230.45
   2   1  10 3480.21  468.67
   2   1  11 9172.34  338.68
   2   1  1253877.13 1288.84
   2   1  13 3894.41  355.95
   2   1  14 1224.45  177.79
   2   1  15  178.26   56.54
   2   1  16 1768.17  204.54
   2   1  17 7492.36  530.49
   2   1  18 3414.76  395.28
   2   1  19   21.48  119.92
   2   1  2010934.44  703.48
   2   1  21 7936.89  604.84
   2   1  22  998.66  227.26
   2   1  23 1053.94   77.24
   2   1  24 1100.91   58.01
   2   1  25 2438.25   94.09
   2   1  26 4288.95  130.35
   2   1  27 7746.65  176.23
   2   1  28  453.18   42.05
   2   1  29   43.69   34.76
   2   1  30   53.92   35.43
   2   1  31 3155.57  120.88
   2   1  32 2730.96  100.73
   2   1  33  223.59   41.61
   2   1  34  639.66   54.92
   2   1  35  418.49   42.21
   2   1  36   84.47   40.50
   2   1  37    1.77   25.46
   2   1  38    0.95   28.74
   2   1  39   67.10   32.98
   2   2   259417.13  903.79
   2   2   3 1596.14  265.44
   2   2   419740.74  423.81
   2   2   5 1147.89  236.08
   2   2   6 7733.74  538.00
   2   2   744642.15  964.28
   2   2   831175.63  930.98
   2   2   974371.37 1239.97
   2   2  10 1112.33   91.45
   2   2  1125268.86 1067.18
   2   2  12 2434.22  434.08
   2   2  13 6472.01  296.94
   2   2  14 2977.35  232.03
   2   2  15 9516.22  664.65
   2   2  1610023.68  639.64
   2   2  17 4127.87  427.90
   2   2  18  475.91  119.19
   2   2  1938115.25 1183.00
   2   2  20    7.84   94.24
   2   2  21   52.57  226.39
   2   2  22 1533.43  335.38
   2   2  23 1002.22   69.19
   2   2  24 8036.40  161.95
   2   2  25 1593.13   68.27
   2   2  26 9266.91  194.57
   2   2  27 2467.27   96.40
   2   2  28 5186.47  132.13
   2   2  29   98.35   37.79
   2   2  3010230.44  286.86
   2   2  31    2.25   39.98
   2   2  32  257.64   39.93
   2   2  33  931.48   61.33
   2   2  34 3780.61  151.48
   2   2  35  581.13   56.40
   2   2  36    3.49   57.33
   2   2  37    2.05   33.28
   2   2  38  246.10   33.47
   2   2  39  169.56   49.13
   2   3   2 8259.13  163.58
   2   3   319348.04  426.88
   2   3   4 3573.89  302.95
   2   3   5107582.0 1737.04
   2   3   656068.54 1065.05
   2   3   7 4174.06  323.13
   2   3   8  276.58  119.88
   2   3   9   87.57   67.51
   2   3  1023045.11  726.04
   2   3  1115639.49  684.68
   2   3  12 1425.16  126.77
   2   3  13 5494.50  609.22
   2   3  1412754.04  606.67
   2   3  15 2470.43  373.69
   2   3  1617346.03  848.49
   2   3  1736679.09 1199.00
   2   3  18  578.06  308.58
   2   3  19    2.82  228.30
   2   3  2027411.05 1198.84
   2   3  2133293.28 1357.51
   2   3  22  714.95  281.01
   2   3  23  838.26   59.54
   2   3  24 6175.69  133.84
   2   3  25 3266.49   93.52
   2   3  26  976.88   61.55
   2   3  27 6450.50  151.04
   2   3  2814369.32  216.72
   2   3  29  349.52   37.11
   2   3  30 1254.23   69.10
   2   3  31 3039.17  103.98
   2   3  32 3702.25  114.59
   2   3  33 1096.85   65.06
   2   3  34  254.20   40.54
   2   3  35   34.99   50.22
   2   3  36  745.78   57.57
   2   3  37   14.47   30.18
   2   3  38   49.81   29.36
   2   4   273854.78  720.45
   2   4   3  655.80  139.00
   2   4   415833.10  465.96
   2   4   512751.44 1104.54
   2   4   612945.40 1001.36
   2   4   718658.97 1010.63
   2   4   8 1095.23  382.47
   2   4   910223.10 1047.40
   2   4  10  694.38  257.79
   2   4  1118009.23 1053.34
   2   4  12    0.99  164.49
   2   4  13 6614.88  575.97
   2   4  1452074.95 1809.67
   2   4  15 8377.89  661.17
   2   4  16  458.01  173.54
   2   4  1728167.82 1275.23
   2   4  18115036.9 2679.10
   2   4  1919639.11 1076.62
   2   4  20 7471.42  748.96
   2   4  21 2034.24  324.21
   2   4  22 5278.14  160.62
   2   4  23  441.06   57.46
   2   4  24 1497.95   76.52
   2   4  25 3390.44  112.92
   2   4  26 6067.00  149.92
   2   4  27   89.77   42.91
   2   4  28 4312.59  132.85
   2   4  29 7276.51  175.47
   2   4  30 1508.79   81.48
   2   4  31  761.99   54.16
   2   4  32   30.40   30.00
   2   4  33 1004.64   49.26
   2   4  34    5.76   31.96
   2   4  35  548.52   53.16
   2   4  36  102.65   26.82
   2   4  37  113.64   31.88
   2   4  38   11.72   25.42
   2   5   273737.58 1378.93
   2   5   3  914.32  125.24
   2   5   479187.17 1276.02
   2   5   532916.13  778.44
   2   5   611344.10  595.56
   2   5   7  526.74  168.67
   2   5   8 3955.42  216.50
   2   5   9  979.21  142.16
   2   5  10 2690.93  391.28
   2   5  1120920.31  739.44
   2   5  12  352.95  180.40
   2   5  1313696.97  579.58
   2   5  1410902.80  517.99
   2   5  1514335.64  708.18
   2   5  1637357.98 1270.41
   2   5  17 5460.85  444.75
   2   5  1820480.76  947.06
   2   5  1927330.17 1164.99
   2   5  2013884.04  939.79
   2   5  21 1976.32  103.82
   2   5  22  426.92   37.69
   2   5  23 4804.41  131.65
   2   5  24 1838.43   84.46
   2   5  25 1535.79   87.68
   2   5  2611198.49  265.47
   2   5  27  112.77   36.38
   2   5  28 1252.78   82.40
   2   5  29 2142.77   98.38
   2   5  30 1661.94   93.39
   2   5  31    0.40   33.34
   2   5  32   13.65   30.41
   2   5  33    4.31   26.76
   2   5  34  778.36   51.82
   2   5  35   45.60   25.33
   2   5  36   22.66   37.39
   2   5  37    2.29   29.04
   2   5  38   19.97   29.37
   2   6   214895.31 1058.55
   2   6   3163730.3 2169.32
   2   6   4127297.6 2306.50
   2   6   546070.20 3358.10
   2   6   6 8792.99  634.43
   2   6   742486.89  975.61
   2   6   8 9427.20  661.77
   2   6   9  218.73   68.31
   2   6  10   84.95  119.12
   2   6  11 1732.12  175.09
   2   6  12 2892.60  311.46
   2   6  13   43.63   93.95
   2   6  1410005.11  614.42
   2   6  15  176.75  112.23
   2   6  1611679.35  894.96
   2   6  17 8004.42  758.25
   2   6  18   63.56  141.57
   2   6  19 3180.69  423.81
   2   6  2013208.73  358.14
   2   6  21 2163.39   87.63
   2   6  22 1844.65   73.54
   2   6  23 2292.15  103.03
   2   6  24  159.29   42.85
   2   6  25 4365.47  155.20
   2   6  26 4926.17  163.69
   2   6  2714551.62  279.02
   2   6  28 1446.14   77.00
   2   6  29 1981.65   98.18
   2   6  30  745.07   55.65
   2   6  31  190.08   41.76
   2   6  32  305.17   37.60
   2   6  33    5.36   26.82
   2   6  34   11.98   27.75
   2   6  35  921.11   64.95
   2   6  36  921.21   58.71
   2   6  37  616.39   65.93
   2   7   263900.94 2553.20
   2   7   3368449.3 5861.50
   2   7   458160.22 1536.12
   2   7   524170.17 1050.18
   2   7   660294.38 1408.43
   2   7   7 5651.40  601.09
   2   7   8   59.26   87.97
   2   7   9  619.02  160.53
   2   7  10 9740.36  544.89
   2   7  1110413.68  578.15
   2   7  12  105.10  125.27
   2   7  1319874.10  908.32
   2   7  14  611.91  140.51
   2   7  15  256.41  338.07
   2   7  16  145.72  185.01
   2   7  17 1145.07  302.37
   2   7  18 1726.18  433.96
   2   7  19  226.89   48.31
   2   7  20 2822.92  129.57
   2   7  21 5967.95  139.80
   2   7  2210682.41  335.99
   2   7  23  887.98   59.21
   2   7  24  135.30   40.41
   2   7  2519928.06  332.38
   2   7  26 3636.94  163.62
   2   7  27  732.17   76.80
   2   7  28  631.81   71.22
   2   7  29  545.48   56.10
   2   7  30    2.78   38.22
   2   7  31  329.48   46.41
   2   7  32 1151.19   74.69
   2   7  33 3839.44  115.47
   2   7  34  153.02   25.94
   2   7  35 3272.03  121.15
   2   7  36  186.11   51.93
   2   7  37  480.54   77.57
   2   8   2100857.5 3159.49
   2   8   3  263.97  289.48
   2   8   4 2397.66  609.62
   2   8   541378.00 2163.22
   2   8   654352.59 2480.88
   2   8   7  216.57  128.13
   2   8   8  954.82  278.34
   2   8   9  106.56  158.60
   2   8  1027249.81 1117.96
   2   8  1132122.08 1208.21
   2   8  12 1618.47  260.31
   2   8  13 2390.96  371.52
   2   8  1422025.11 2467.25
   2   8  15 9775.54 1253.32
   2   8  16  411.61  426.18
   2   8  17 1118.85  409.23
   2   8  18 5654.46  187.92
   2   8  19  999.24   63.28
   2   8  20  218.93   46.44
   2   8  21   14.60   62.38
   2   8  22 2574.91  114.05
   2   8  23 7351.07  224.68
   2   8  2416934.06  446.57
   2   8  25    1.10   48.69
   2   8  26 3932.39  189.55
   2   8  27 2884.49  133.21
   2   8  28 1474.72   99.84
   2   8  29 1328.69   85.81
   2   8  30  475.54   51.30
   2   8  31 1420.72   70.03
   2   8  32 4826.11  133.88
   2   8  33 2111.02   83.00
   2   8  34  635.12   42.79
   2   8  35  544.21   64.17
   2   8  36 3033.00  327.08
   2   9   213159.27 1221.90
   2   9   3 3811.63  702.01
   2   9   479761.60 3178.92
   2   9   5 8970.69  993.80
   2   9   6  693.57  317.71
   2   9   7   75.74  167.36
   2   9   823196.33 1717.73
   2   9   9  155.87  186.09
   2   9  10  392.90  322.25
   2   9  11 5467.77  808.25
   2   9  1242567.29 2278.71
   2   9  13 2702.80  616.73
   2   9  14 6968.62 1312.48
   2   9  15 8167.04 1543.76
   2   9  16 7808.34  178.75
   2   9  17  578.64   73.92
   2   9  18  993.40   57.65
   2   9  19 4508.83  128.95
   2   9  20  449.09   37.18
   2   9  21 1018.77   78.98
   2   9  22 2634.00  121.53
   2   9  23 1302.31  104.19
   2   9  24 7721.34  311.29
   2   9  25    1.97   52.43
   2   9  26 4648.91  197.20
   2   9  27    4.28   44.84
   2   9  28  193.91   42.01
   2   9  29  144.76   30.22
   2   9  30  576.48   46.58
   2   9  31  277.46   35.42
   2   9  32   70.90   28.29
   2   9  33  166.90   30.80
   2   9  34 8929.80  272.42
   2   9  35   94.35   38.13
   2  10   248156.47 2662.64
   2  10   313166.91 1361.30
   2  10   432088.70 2005.03
   2  10   517039.79 1491.65
   2  10   6 2447.95  502.34
   2  10   7 8422.32 1052.30
   2  10   8  576.88  397.84
   2  10   9 8001.92 1075.38
   2  10  1028110.72 1865.54
   2  10  11 4648.20  809.21
   2  10  12 3087.87  759.25
   2  10  1313947.73 2242.97
   2  10  14  135.08   37.30
   2  10  15  195.40   46.14
   2  10  16 8912.53  196.00
   2  10  17 4882.27  158.51
   2  10  18 3563.94  130.47
   2  10  19 2026.46  118.25
   2  10  20 1438.61   91.81
   2  10  21 3054.43  146.98
   2  10  22  344.05   71.43
   2  10  23 1400.90  105.20
   2  10  24 2654.27  142.07
   2  10  25  457.77   65.10
   2  10  26  741.82   70.95
   2  10  27  854.78   68.08
   2  10  28  272.53   42.78
   2  10  29   14.29   28.80
   2  10  30    0.17   28.02
   2  10  31 2019.24  100.21
   2  10  32 1621.27   70.40
   2  10  33  118.21   26.99
   2  10  34   25.58   35.17
   2  11   292458.36 3839.75
   2  11   344445.95 2755.62
   2  11   4 4329.24  853.11
   2  11   5    1.53  174.64
   2  11   613992.17 1451.64
   2  11   7 1125.96  493.39
   2  11   8  523.48  236.88
   2  11   9 3083.09  673.29
   2  11  10  775.00  224.28
   2  11  11 2194.27  103.47
   2  11  12 4078.35  136.29
   2  11  13 5146.61  144.10
   2  11  1411211.89  203.58
   2  11  15    0.74   30.00
   2  11  16 2672.19  119.92
   2  11  1711267.63  228.29
   2  11  18 2987.70  173.65
   2  11  19  123.87   49.52
   2  11  20 3521.93  187.79
   2  11  21 5081.91  192.30
   2  11  22 2362.76  162.44
   2  11  23  331.28   66.54
   2  11  24  189.96   55.08
   2  11  25  720.76   71.61
   2  11  26   73.93   34.60
   2  11  27  435.08   44.66
   2  11  28    8.83   32.08
   2  11  29   21.46   29.06
   2  11  30   41.91   27.54
   2  11  31  148.69   32.75
   2  11  32  388.31   43.86
   2  11  33  621.71  129.47
   2  12   2  550.10  426.79
   2  12   326714.51 2254.17
   2  12   422583.77 2077.86
   2  12   5 2557.90  611.68
   2  12   6  134.94   57.05
   2  12   7  512.23   61.56
   2  12   8  526.74   62.19
   2  12   9  193.08   35.77
   2  12  10 4383.63  129.82
   2  12  11 8554.28  196.62
   2  12  12  951.67   50.63
   2  12  13  257.07   40.96
   2  12  14  121.77   32.13
   2  12  15 2128.75   98.70
   2  12  16 4893.03  156.51
   2  12  17 5159.22  165.26
   2  12  18 4151.56  144.48
   2  12  1919026.27  334.59
   2  12  20 4835.42  179.84
   2  12  21  160.98   52.10
   2  12  22  232.88   55.38
   2  12  23 2342.40  121.73
   2  12  24   70.44   35.27
   2  12  25  269.35   44.13
   2  12  26   22.52   34.36
   2  12  27 1021.69   84.26
   2  12  28    5.16   31.23
   2  12  29    1.58   33.61
   2  12  30  573.13   55.79
   2  12  31   37.12   35.49
   2  12  32   59.93   34.55
   2  13   2 8751.26  174.32
   2  13   3 5020.34  158.61
   2  13   4 1783.43   93.88
   2  13   5   49.62   38.62
   2  13   6  854.30   70.74
   2  13   7  435.19   56.82
   2  13   8 6116.53  189.31
   2  13   9 2366.51  126.35
   2  13  10  480.17   60.59
   2  13  11 2951.61  111.91
   2  13  12   17.53   32.94
   2  13  13 1796.09   86.04
   2  13  14  123.29   38.05
   2  13  15   28.88   41.98
   2  13  1620124.06  354.03
   2  13  17 4051.16  164.29
   2  13  18 3921.35  154.75
   2  13  19   82.95   41.35
   2  13  2011301.05  263.88
   2  13  21 1317.10   99.86
   2  13  22 5135.58  175.51
   2  13  23   95.19   44.21
   2  13  24  391.92   52.98
   2  13  25    0.19   27.89
   2  13  26  106.07   26.51
   2  13  27  162.99   29.00
   2  13  28    0.79   26.14
   2  13  29  459.58   50.00
   2  13  30   41.47   44.66
   2  14   2    5.21   29.46
   2  14   3 6928.72  179.72
   2  14   4  548.91   69.15
   2  14   5  889.20   67.02
   2  14   6  989.67   96.78
   2  14   7 3439.06  136.16
   2  14   8  172.57   51.39
   2  14   9 4599.42  163.49
   2  14  10 6862.70  216.38
   2  14  11  401.45   57.85
   2  14  12  408.90   47.42
   2  14  13  211.40   43.00
   2  14  14 2548.60  118.45
   2  14  15   85.06   42.10
   2  14  16  960.18   88.91
   2  14  17 1151.82   91.19
   2  14  18 9768.60  218.11
   2  14  19 4715.44  160.82
   2  14  20 7745.56  222.20
   2  14  21 1762.94  110.31
   2  14  22 2190.35   94.95
   2  14  23  319.36   34.75
   2  14  24  921.01   58.67
   2  14  25  323.84   35.07
   2  14  26  227.70   30.56
   2  14  27   95.45   30.44
   2  14  28   69.99   33.13
   2  14  29  667.49   75.07
   2  15   2 6220.07  164.73
   2  15   3  460.12   48.72
   2  15   4  216.15   35.15
   2  15   5 2653.04  118.17
   2  15   6 6682.50  198.95
   2  15   7 5275.76  213.22
   2  15   8 1206.59   75.22
   2  15   9 3620.64  169.50
   2  15  10 2504.00  135.41
   2  15  11 4915.71  178.48
   2  15  12 1671.60   96.11
   2  15  13 1444.53   97.05
   2  15  14  322.89   48.06
   2  15  15 1113.69   70.90
   2  15  16  308.54   40.29
   2  15  17 2375.20  108.86
   2  15  18 3503.86  125.04
   2  15  19  934.40   62.08
   2  15  20  232.72   37.95
   2  15  21 7123.91  183.58
   2  15  22 2288.26   96.72
   2  15  23  104.71   34.25
   2  15  24  256.18   35.22
   2  15  25    0.65   33.48
   2  15  26   46.10   29.08
   2  15  27  171.34   31.61
   2  16   2 2756.83  137.68
   2  16   3    8.82   45.37
   2  16   4 3879.63  164.71
   2  16   5  250.54   48.03
   2  16   6  569.76   74.25
   2  16   7 4400.09  179.84
   2  16   8 3713.54  186.62
   2  16   9 8381.70  239.62
   2  16  10   87.72   45.98
   2  16  11 5053.40  168.55
   2  16  12 1029.74   85.73
   2  16  13 1655.90  100.56
   2  16  14   91.07   40.42
   2  16  15  734.49   66.42
   2  16  16  997.07   77.81
   2  16  17    2.95   37.79
   2  16  18 1530.85   86.14
   2  16  19 3269.56  163.13
   2  16  20 1018.05   65.45
   2  16  21   97.23   36.23
   2  16  22   62.69   28.26
   2  16  23   19.69   29.78
   2  16  24   77.48   25.32
   2  16  25   75.18   70.98
   2  17   2    7.55   41.71
   2  17   3 1461.90  104.61
   2  17   4  391.45   73.12
   2  17   5   39.21   42.49
   2  17   6  703.24   68.09
   2  17   7  968.32   79.09
   2  17   8 2300.70  131.80
   2  17   9  965.28   89.80
   2  17  10  556.53   66.02
   2  17  11 5174.20  186.20
   2  17  12 4036.24  162.72
   2  17  13  321.97   55.66
   2  17  14 2344.28  115.34
   2  17  15 2056.37  109.21
   2  17  16    0.21   29.33
   2  17  17  124.99   38.17
   2  17  18   88.48   30.48
   2  17  19  524.45   49.77
   2  17  20  156.25   23.20
   2  17  21   15.12   23.61
   2  17  22  214.97   96.16
   2  17  23   65.98   48.70
   2  18   2 4163.31  164.87
   2  18   3  120.05   38.06
   2  18   4  215.54   45.68
   2  18   5  151.00   42.27
   2  18   6   73.17   44.01
   2  18   7  670.17   73.71
   2  18   8  848.15   67.81
   2  18   9  931.00   73.10
   2  18  10 2490.28  110.54
   2  18  11 1464.56   89.83
   2  18  12  583.74   57.38
   2  18  13 1974.99   93.46
   2  18  14 2087.39   92.59
   2  18  15   41.54   29.06
   2  18  16   35.62   34.85
   2  18  17 1562.75  129.55
   2  18  18   40.30   23.47
   2  18  19    7.41   29.58
   2  18  20  186.13   47.61
   2  19   2  323.34   47.93
   2  19   3 2226.97  110.18
   2  19   4 2132.96  106.11
   2  19   5    1.64   44.35
   2  19   6 1009.19   85.44
   2  19   7  409.33   82.15
   2  19   8    0.17   38.97
   2  19   9 1058.14   75.99
   2  19  10  898.04   69.90
   2  19  11  109.47   48.65
   2  19  12  728.80   73.64
   2  19  13   28.31   26.36
   2  19  14  992.64   67.59
   2  19  15  655.40   60.01
   2  19  16  133.14   43.52
   2  20   2  162.15   24.42
   2  20   3  639.97   63.35
   2  20   4   26.57   32.35
   2  20   5  952.84   75.68
   2  20   6    0.66   29.72
   2  20   7  733.49   75.17
   2  20   8  894.97   95.90
   2  20   9    4.87   28.41
   2  20  10    0.49   25.65
   2  20  11   97.02   25.96
   2  20  12  512.49   59.61
   2  21   2  118.77   35.72
   2  21   3  295.60   61.38
   3   0   335209.60 1800.97
   3   0   5 1442.71  214.80
   3   0   780686.60 4176.30
   3   0   918021.63 1290.90
   3   0  11 1115.47  394.68
   3   0  13  115.59  176.83
   3   0  15 1207.09  294.72
   3   0  17 6192.78  833.02
   3   0  1936145.20 1985.79
   3   0  21 5636.24  834.40
   3   0  23 3954.33  195.32
   3   0  25   64.97   44.42
   3   0  27 1819.55  137.61
   3   0  29 3624.40  166.93
   3   0  31    1.25   49.75
   3   0  33   30.07   37.46
   3   0  35  492.29   60.39
   3   0  37  844.01   81.85
   3   1   319329.17  533.70
   3   1   4 1999.67  209.47
   3   1   5  290.38  130.61
   3   1   6 9953.21  601.19
   3   1   722588.56  794.89
   3   1   8 6292.80  545.95
   3   1   919799.35  668.07
   3   1  10 6211.73  421.26
   3   1  11 2133.65  294.49
   3   1  1227488.71 1105.09
   3   1  13 2066.42  297.25
   3   1  14 1345.98  274.44
   3   1  15    7.49  134.00
   3   1  16  555.40  150.69
   3   1  1723463.27 1119.38
   3   1  1828818.90 1227.54
   3   1  19  401.06  160.52
   3   1  20   12.13  142.52
   3   1  2118896.85 1052.79
   3   1  2218030.66  336.42
   3   1  23  460.06   46.77
   3   1  24 5374.81  146.64
   3   1  25 1259.96   77.70
   3   1  26 1670.77   86.80
   3   1  27 7424.30  187.94
   3   1  28 3652.82  128.13
   3   1  29  215.16   41.95
   3   1  30 1114.16   64.47
   3   1  31  388.17   44.66
   3   1  32    9.55   36.04
   3   1  33  235.93   37.49
   3   1  34  626.82   47.08
   3   1  35  282.19   35.69
   3   1  36   55.29   25.89
   3   1  37   14.51   29.40
   3   1  38  395.45   36.50
   3   2   354980.87  853.24
   3   2   4 2440.87  337.92
   3   2   533807.43 1561.88
   3   2   6 3733.30  183.38
   3   2   7 1648.22  336.84
   3   2   8   95.09  117.63
   3   2   923048.31  727.02
   3   2  1011298.97  536.76
   3   2  11   73.78  105.90
   3   2  12  523.74  163.24
   3   2  13 4727.47  514.54
   3   2  14 1276.39  228.59
   3   2  15  267.78   78.89
   3   2  16 8706.18  488.06
   3   2  17 9654.76  742.52
   3   2  18 3297.88  422.55
   3   2  19 7951.15  681.65
   3   2  2045550.14 1637.71
   3   2  2131356.66 1390.28
   3   2  22  104.72   42.35
   3   2  23 9462.54  173.55
   3   2  24   21.81   38.15
   3   2  2521933.79  283.55
   3   2  26 1375.00   68.21
   3   2  27 5697.98  143.54
   3   2  28 7933.46  190.61
   3   2  29 3753.64  138.28
   3   2  30   50.86   37.44
   3   2  31  341.50   50.41
   3   2  32  197.61   37.72
   3   2  33   43.19   33.15
   3   2  34    1.71   30.03
   3   2  35  579.40   58.62
   3   2  36  810.84   62.82
   3   2  37    7.10   27.22
   3   2  38    1.88   39.74
   3   3   3117860.7 1402.04
   3   3   439451.07  681.65
   3   3   5 7719.95  312.58
   3   3   6113661.2 2025.00
   3   3   7171585.2 2582.59
   3   3   825148.69 1097.00
   3   3   9 5420.33  342.46
   3   3  10 6747.22  317.56
   3   3  11 9765.44  539.72
   3   3  12  290.77  120.82
   3   3  13 1830.74  223.66
   3   3  14  550.71  100.16
   3   3  15 6137.33  443.85
   3   3  16 7169.28  588.93
   3   3  17  499.31  125.27
   3   3  18 3213.77  460.26
   3   3  1922056.57 1264.75
   3   3  2015384.78 1154.24
   3   3  21  614.41   89.61
   3   3  22 4197.66  122.19
   3   3  2321420.44  289.41
   3   3  2410188.25  185.34
   3   3  2517039.34  288.19
   3   3  26 8616.69  180.06
   3   3  27 2063.88   80.76
   3   3  28 3593.66  108.02
   3   3  29 6160.67  154.69
   3   3  30 3296.20  121.77
   3   3  31   45.99   33.08
   3   3  32  154.62   41.49
   3   3  33  220.47   42.71
   3   3  34    2.84   31.17
   3   3  35   12.58   31.58
   3   3  36  451.71   48.68
   3   3  37  858.95   62.49
   3   4   3145707.4 2081.50
   3   4   4167530.4 2352.24
   3   4   5149488.2 2502.54
   3   4   619067.28  675.94
   3   4   758702.05 1161.67
   3   4   864342.44 1350.17
   3   4   920866.29  777.67
   3   4  1011972.83  502.16
   3   4  11  309.47  131.28
   3   4  12 9912.60  561.84
   3   4  13  109.25  116.29
   3   4  14  470.86  299.64
   3   4  15 1303.35  336.90
   3   4  16  265.70  308.26
   3   4  17   12.29  103.50
   3   4  18 1006.14  393.59
   3   4  1918798.66 1575.28
   3   4  20  986.34  533.65
   3   4  21 2476.03  109.18
   3   4  2213666.91  253.55
   3   4  23  176.49   47.36
   3   4  24 1454.93   73.62
   3   4  25  822.82   67.54
   3   4  26 9436.21  217.04
   3   4  2712362.87  244.38
   3   4  28  752.82   70.14
   3   4  29 3721.26  132.73
   3   4  30 2058.39   93.44
   3   4  31  561.69   56.79
   3   4  32  258.21   44.72
   3   4  33   30.70   33.25
   3   4  34  254.28   39.24
   3   4  35  174.90   35.04
   3   4  36    8.62   30.86
   3   4  37  144.78   29.22
   3   5   3145252.1 5524.00
   3   5   4104167.7 5339.00
   3   5   5202794.1 3648.50
   3   5   610951.42  634.40
   3   5   7  405.90  296.02
   3   5   820988.20  787.40
   3   5   9 7027.37  682.62
   3   5  10 9631.16  712.82
   3   5  11 1749.76  147.16
   3   5  1212175.08  714.67
   3   5  13 2597.04  446.33
   3   5  1414444.00  739.92
   3   5  15  434.88  252.50
   3   5  16 3091.99  400.39
   3   5  17 1261.05  414.59
   3   5  18  154.52  196.28
   3   5  19  600.94  296.96
   3   5  20 1649.25  148.45
   3   5  21 2724.11  120.15
   3   5  22  643.30   60.35
   3   5  23  522.64   46.21
   3   5  24  431.11   54.84
   3   5  25 3677.83  125.77
   3   5  26 1821.96   99.49
   3   5  27 6856.65  186.53
   3   5  28 1007.55   70.38
   3   5  29 1327.52   76.64
   3   5  30  241.60   40.45
   3   5  31   96.37   33.72
   3   5  32   15.22   32.23
   3   5  33    0.69   25.16
   3   5  34  329.43   42.47
   3   5  35 1098.86   86.36
   3   5  36   52.02   25.90
   3   5  37    3.70   39.64
   3   6   358766.79 1625.60
   3   6   444113.34 2150.10
   3   6   515812.72  914.10
   3   6   6100674.2 5034.15
   3   6   714017.37  509.50
   3   6   8 2190.51  384.25
   3   6   911572.96  625.46
   3   6  10 1652.62   96.83
   3   6  11 5285.69  302.65
   3   6  1237789.09 1098.80
   3   6  13 4252.49  344.46
   3   6  1410352.13  622.58
   3   6  1512741.67  568.59
   3   6  1612215.02 1340.50
   3   6  17 6751.33  717.01
   3   6  18 3187.57  508.23
   3   6  19   84.88   73.06
   3   6  20  830.36   56.34
   3   6  21 4999.69  158.74
   3   6  22 1317.33   61.75
   3   6  23  458.78   44.62
   3   6  24 1458.26   73.78
   3   6  25  603.40   60.27
   3   6  26  186.53   39.82
   3   6  27  570.82   61.76
   3   6  28 4149.71  143.73
   3   6  29    0.15   38.63
   3   6  30  172.44   38.05
   3   6  31   29.71   34.64
   3   6  32 2583.37  105.40
   3   6  33  769.56   55.25
   3   6  34  295.80   37.89
   3   6  35    0.22   29.73
   3   6  36 1486.65  175.29
   3   7   321119.00 1622.47
   3   7   4217793.2 5009.67
   3   7   518412.54 1294.08
   3   7   6  424.27  149.28
   3   7   7    0.41  174.37
   3   7   810270.09  633.17
   3   7   9 5104.13  360.58
   3   7  1016746.39  820.84
   3   7  11 1185.42  216.17
   3   7  1274985.33 4150.35
   3   7  13 5683.59  439.71
   3   7  1456673.53 1604.20
   3   7  15 3700.88  398.13
   3   7  1613700.18 1714.50
   3   7  17  379.26  160.32
   3   7  18 1816.80  109.07
   3   7  1910030.31  218.58
   3   7  20  360.31   53.62
   3   7  21 3407.41  111.49
   3   7  22  431.45   38.24
   3   7  23 6771.36  175.13
   3   7  24  731.66   60.56
   3   7  25   49.99   38.69
   3   7  26 1408.56   89.44
   3   7  27  475.08   51.14
   3   7  28  337.38   51.84
   3   7  29  507.36   63.36
   3   7  30 1818.32  103.43
   3   7  31    0.66   32.82
   3   7  32  589.03   49.78
   3   7  33  101.81   28.17
   3   7  34 7110.65  232.57
   3   7  35  192.41   34.78
   3   8   353251.93 2536.33
   3   8   412963.75 1345.75
   3   8   5  131.46  187.71
   3   8   6 8200.15 1053.30
   3   8   7 1260.29  375.28
   3   8   818391.93 1520.24
   3   8   910363.58 1117.41
   3   8  1022519.57 1634.01
   3   8  11122225.0 4343.50
   3   8  1236058.91 1813.87
   3   8  13 3613.77  594.17
   3   8  1418773.62 1875.15
   3   8  1534513.96 2975.49
   3   8  16 4067.17  175.51
   3   8  17 3615.76  127.06
   3   8  18  235.14   53.32
   3   8  19 1719.05   90.57
   3   8  20  542.33   56.87
   3   8  21    0.08   35.54
   3   8  22 2567.60  108.02
   3   8  23  869.15   66.79
   3   8  24  211.47   54.32
   3   8  25  674.47   61.55
   3   8  26 1155.78   71.20
   3   8  27  489.96   62.57
   3   8  28  141.79   41.25
   3   8  29  200.78   38.73
   3   8  30  354.39   55.72
   3   8  31 1613.56   83.34
   3   8  32 3596.44  103.24
   3   8  33 3524.41   95.19
   3   8  34  322.67   30.13
   3   8  35  272.09   88.36
   3   9   318420.44 1617.00
   3   9   4   23.61  185.99
   3   9   511696.40 1366.53
   3   9   613423.47 1363.44
   3   9   7 2962.67  685.51
   3   9   8 9987.92 1261.63
   3   9   959299.65 2884.86
   3   9  10 4775.87  871.11
   3   9  11 4068.63  536.34
   3   9  12 7051.02  755.85
   3   9  1370890.96 6459.45
   3   9  14  893.20   54.63
   3   9  15 3239.76  129.50
   3   9  16 1588.30   85.07
   3   9  17 8442.52  207.41
   3   9  18 1993.60   96.10
   3   9  19 1877.76  109.52
   3   9  20 1101.11   77.62
   3   9  21 2123.95   95.50
   3   9  22  358.43   48.08
   3   9  23  362.12   46.32
   3   9  24  891.82   75.20
   3   9  25    1.06   47.98
   3   9  26  116.39   47.59
   3   9  27   77.23   41.66
   3   9  28    0.07   38.41
   3   9  29  760.22   55.38
   3   9  30   53.50   29.51
   3   9  31 1466.27   70.76
   3   9  32    1.02   26.04
   3   9  33  640.45   43.19
   3   9  34  102.47   45.16
   3  10   3 7418.10 1076.84
   3  10   4 3384.46  767.68
   3  10   5 2074.94  617.03
   3  10   6   17.09  131.89
   3  10   7    2.00  241.46
   3  10   8  386.43  135.77
   3  10   910372.46 1295.93
   3  10  1039990.70 2438.20
   3  10  1138545.53 2467.82
   3  10  12   51.28   33.56
   3  10  13 4450.68  105.95
   3  10  1411996.41  210.54
   3  10  15 1466.94   62.56
   3  10  16 1983.86   87.57
   3  10  17   81.30   38.28
   3  10  18  916.97   87.13
   3  10  19 3122.21  149.16
   3  10  20 2340.65  125.62
   3  10  21 1170.12   83.00
   3  10  22  404.26   56.22
   3  10  23  616.48   75.28
   3  10  24   27.71   42.57
   3  10  25   83.66   47.21
   3  10  26   15.95   41.83
   3  10  27  436.59   62.33
   3  10  28  192.09   43.51
   3  10  29    0.67   29.06
   3  10  30   79.87   30.48
   3  10  31   20.33   24.78
   3  10  32 1252.14   95.37
   3  10  33  597.77   50.15
   3  11   3  923.05  449.84
   3  11   421110.85 1886.28
   3  11   5 2358.62  596.72
   3  11   6   10.55  285.06
   3  11   724130.25 1949.68
   3  11   8 4229.00  144.82
   3  11   9 5893.66  157.99
   3  11  10 1043.14   73.16
   3  11  11 8281.63  180.01
   3  11  12    7.46   26.99
   3  11  13  211.76   38.59
   3  11  14 1218.92  101.20
   3  11  15 2349.42  109.63
   3  11  16 1473.97  100.31
   3  11  17  134.13   40.68
   3  11  18 7190.75  223.25
   3  11  19  200.73   51.44
   3  11  20 2149.68  142.65
   3  11  21  223.17   71.41
   3  11  22 1193.41  121.47
   3  11  23  200.12   50.81
   3  11  24  182.42   50.93
   3  11  25  109.75   41.43
   3  11  26 1587.42   92.55
   3  11  27   55.62   33.49
   3  11  28  103.46   31.15
   3  11  29   66.84   27.75
   3  11  30  729.21   51.62
   3  11  31   52.00   25.90
   3  11  32    0.19   35.79
   3  12   3 3266.01  133.65
   3  12   4   31.56   32.23
   3  12   5    0.23   30.10
   3  12   6 3762.40  118.20
   3  12   7 4323.96  144.27
   3  12   8  716.12   53.34
   3  12   9 3992.24  132.85
   3  12  10 4385.18  130.43
   3  12  11   24.70   35.87
   3  12  12   22.92   32.79
   3  12  13  331.70   52.47
   3  12  14 3202.92  129.11
   3  12  15 2421.15  135.65
   3  12  16 4407.67  162.02
   3  12  17   11.77   40.18
   3  12  18 4306.61  161.14
   3  12  19 8018.02  225.15
   3  12  20 4614.84  197.01
   3  12  21  522.44   68.98
   3  12  22    3.68   46.25
   3  12  23  628.88   68.96
   3  12  24    8.49   40.63
   3  12  25  278.66   43.69
   3  12  26   80.95   29.24
   3  12  27  612.32   51.11
   3  12  28 3751.96  151.47
   3  12  29  490.61   46.17
   3  12  30   96.73   32.39
   3  12  31   68.25   32.22
   3  13   3 5078.88  162.61
   3  13   4 4026.25  133.91
   3  13   512468.97  241.87
   3  13   6  313.80   45.01
   3  13   7  286.65   41.92
   3  13   8  584.59   58.87
   3  13   9 2771.51  122.45
   3  13  10   42.30   30.72
   3  13  11   12.64   33.37
   3  13  12  773.98   70.34
   3  13  13 1871.95   98.96
   3  13  14   13.28   40.03
   3  13  15    0.11   50.08
   3  13  16   37.90   46.96
   3  13  1720886.51  369.90
   3  13  18 1884.87  112.77
   3  13  19  965.72   87.45
   3  13  20   14.83   49.89
   3  13  2110215.61  254.16
   3  13  22  460.51   59.45
   3  13  23  422.83   43.83
   3  13  24  616.77   54.50
   3  13  25  288.77   36.34
   3  13  26  172.63   29.79
   3  13  27 3441.59  149.62
   3  13  28   17.14   35.06
   3  13  29 2122.72  100.19
   3  14   3 1027.61   65.56
   3  14   4 2552.05  113.11
   3  14   5 1646.26   89.57
   3  14   6  794.66   64.55
   3  14   7 3322.20  140.00
   3  14   8   26.14   40.14
   3  14   9    9.75   35.60
   3  14  10   69.02   36.51
   3  14  11    4.33   33.92
   3  14  12   57.19   38.85
   3  14  13  323.24   48.95
   3  14  14 4175.88  160.28
   3  14  15 4545.03  173.99
   3  14  16    0.08   51.09
   3  14  17 1486.75   97.34
   3  14  18 3485.90  148.51
   3  14  1911340.56  339.91
   3  14  20 1287.99   78.86
   3  14  21 3090.03  129.02
   3  14  22 1664.80   96.74
   3  14  23  871.54   67.20
   3  14  24    2.19   39.27
   3  14  25  182.71   25.38
   3  14  26    0.30   26.26
   3  14  27 1980.47   84.98
   3  14  28  295.70  108.56
   3  15   3  199.42   40.86
   3  15   4    6.09   30.21
   3  15   5  400.49   44.37
   3  15   6 1789.48  109.87
   3  15   7  139.90   40.49
   3  15   8  385.51   61.03
   3  15   9  572.38   77.44
   3  15  10  879.95   87.59
   3  15  11 1037.99  113.89
   3  15  12  185.94   41.63
   3  15  13   94.37   45.05
   3  15  14    8.66   44.02
   3  15  15 3181.18  133.28
   3  15  16 4334.04  155.67
   3  15  17  182.20   47.01
   3  15  18 1869.51   94.44
   3  15  19 2294.84  100.42
   3  15  20 1788.34   95.11
   3  15  21  363.25   46.51
   3  15  22 3937.10  182.66
   3  15  23 1022.15   66.21
   3  15  24   32.41   26.68
   3  15  25    6.76   28.57
   3  15  26  161.02   54.94
   3  16   3  421.13   46.17
   3  16   4   28.06   32.90
   3  16   5  216.79   35.21
   3  16   6  678.41   74.78
   3  16   7  399.15   59.37
   3  16   8   18.93   42.15
   3  16   9   39.75   54.36
   3  16  10 7971.55  272.29
   3  16  11   83.10   55.72
   3  16  12  453.61   68.86
   3  16  13 3032.13  152.19
   3  16  14  772.01   69.00
   3  16  15    6.60   33.00
   3  16  16    0.55   34.17
   3  16  17  428.47   73.71
   3  16  18  155.53   33.08
   3  16  19 1154.75   76.71
   3  16  20 5726.24  205.50
   3  16  21  218.59   35.60
   3  16  22  308.15   40.92
   3  16  23   50.69   29.11
   3  16  24  182.10   36.52
   3  17   3  309.30   51.51
   3  17   4   34.65   34.18
   3  17   5   16.89   46.76
   3  17   6 1108.62   90.45
   3  17   7    1.14   44.76
   3  17   8 3353.05  162.92
   3  17   9 2852.29  159.40
   3  17  10   11.86   43.02
   3  17  11   49.53   46.41
   3  17  12 5744.60  193.57
   3  17  13 4592.42  170.88
   3  17  14   71.28   45.04
   3  17  15  259.55   49.18
   3  17  16  255.95   64.41
   3  17  17   77.69   35.24
   3  17  18  608.76   62.45
   3  17  19    2.84   31.83
   3  17  20  382.09   51.33
   3  17  21  104.77   41.34
   3  18   3 1109.88   76.39
   3  18   4 2962.65  133.23
   3  18   5   55.52   40.50
   3  18   6  392.12   45.32
   3  18   7  306.33   45.52
   3  18   8  963.43   83.42
   3  18   9 1364.12   92.35
   3  18  10  465.54   48.30
   3  18  11 2667.50  115.37
   3  18  12  554.83   65.88
   3  18  13   77.70   35.51
   3  18  14    0.73   33.53
   3  18  15 2101.93  143.08
   3  18  16    0.42   24.82
   3  18  17   11.47   23.55
   3  18  18  193.04   80.20
   3  19   3    7.31   29.43
   3  19   4 1657.48  112.57
   3  19   5 1606.15  111.64
   3  19   6  136.04   34.76
   3  19   7  719.42   64.00
   3  19   8  114.47   37.14
   3  19   9    6.58   26.40
   3  19  10  707.13   50.09
   3  19  11    2.66   27.63
   3  19  12  564.96   93.00
   3  19  13  832.61   79.35
   3  19  14    1.75   26.11
   3  19  15   46.62   48.10
   3  20   3  402.78   61.16
   3  20   4   84.47   48.31
   3  20   5  183.90   33.39
   3  20   6 1701.90  150.33
   3  20   7  116.27   36.30
   3  20   8  173.34   36.37
   3  20   9   10.54   22.48
   3  20  10   11.14   50.91
   4   0   4    3.14  214.83
   4   0   6 5120.46  985.70
   4   0   8  647.00  288.02
   4   0  10 4329.85  289.54
   4   0  12  991.63  225.83
   4   0  14 1145.06  493.17
   4   0  16    9.00  140.39
   4   0  18    4.39  227.42
   4   0  2019538.98  569.22
   4   0  22 2028.12  136.01
   4   0  24  934.04  110.77
   4   0  26  583.71   90.07
   4   0  28 3108.64  181.56
   4   0  30 2431.59  133.84
   4   0  32   32.22   50.17
   4   0  34  230.07   43.07
   4   0  36 1213.18  113.90
   4   1   4 4592.82  332.68
   4   1   513014.21  839.71
   4   1   615132.23  747.99
   4   1   7 1787.34  355.26
   4   1   8    3.59  163.42
   4   1   9 6216.46  648.49
   4   1  10   26.97  117.38
   4   1  11 1593.18  213.39
   4   1  12 8728.78  501.29
   4   1  1317721.63  930.54
   4   1  14 7061.94  592.91
   4   1  1521685.81 1086.31
   4   1  16 2124.95  280.80
   4   1  17 4793.99  379.92
   4   1  18 6348.96  625.54
   4   1  1921782.93 1169.12
   4   1  20 8036.70  190.32
   4   1  21   86.89   54.62
   4   1  22 7258.22  200.55
   4   1  23 4825.17  171.84
   4   1  24  794.79   54.98
   4   1  25 1388.83   86.33
   4   1  26   51.02   34.19
   4   1  27 2355.33  114.10
   4   1  28 2908.50  119.40
   4   1  29    0.67   37.20
   4   1  30 1764.51   80.54
   4   1  31  482.02   47.30
   4   1  32   17.99   31.68
   4   1  33  930.40   56.94
   4   1  34    0.79   26.13
   4   1  35 1307.27   58.42
   4   1  36 1424.93   78.96
   4   1  37   87.20   64.44
   4   2   458013.77 1411.56
   4   2   5  241.30   81.44
   4   2   6   20.33   76.28
   4   2   764014.40 1664.43
   4   2   8  209.46  161.53
   4   2   9   67.26  165.36
   4   2  1014675.70  807.82
   4   2  11 4821.89  563.02
   4   2  12 6868.01  544.59
   4   2  13 1328.10  300.59
   4   2  1433568.43 1389.43
   4   2  15 3101.61  361.02
   4   2  16 5621.84  524.23
   4   2  17 1750.37  318.77
   4   2  1844056.10 1700.29
   4   2  19  640.08  177.90
   4   2  20 3776.63  136.49
   4   2  2115324.77  304.71
   4   2  2233551.87  625.65
   4   2  23 1317.30   97.06
   4   2  24 2061.28  113.91
   4   2  25  804.85   59.05
   4   2  26 5162.30  159.76
   4   2  27 1178.85   78.99
   4   2  28   63.03   37.78
   4   2  29 7479.36  167.89
   4   2  30  279.72   58.76
   4   2  31    0.30   40.98
   4   2  32 2690.64   98.25
   4   2  33    2.87   32.28
   4   2  34 2090.02   93.37
   4   2  35   50.27   35.96
   4   2  36 2497.31  122.42
   4   3   4101846.4 1593.84
   4   3   5142818.2 1949.04
   4   3   6 6746.01  574.23
   4   3   723420.25  935.66
   4   3   832925.33 1321.71
   4   3   924089.57  968.46
   4   3  10 2777.87  301.36
   4   3  11 3757.50  294.67
   4   3  1220938.21  994.42
   4   3  13 2462.59  275.74
   4   3  14 1528.63  344.65
   4   3  1514381.19  873.66
   4   3  1641954.33 1730.67
   4   3  17 7404.57  814.89
   4   3  18   48.06  194.77
   4   3  19 5977.52  293.70
   4   3  2038085.54  504.13
   4   3  2116273.03  290.05
   4   3  22   21.86   50.04
   4   3  23   65.15   36.84
   4   3  2411429.59  236.08
   4   3  25  920.73   78.02
   4   3  26 4476.76  141.70
   4   3  27 7110.48  171.01
   4   3  28  285.98   36.79
   4   3  29 1217.45   92.82
   4   3  30   14.44   50.04
   4   3  31 1894.40  105.77
   4   3  32 3065.20  156.22
   4   3  33 1652.71   88.23
   4   3  34 2714.97  141.17
   4   3  35   60.69   20.19
   4   3  36  212.95   47.72
   4   4   482227.68 1767.55
   4   4   5156201.3 3834.47
   4   4   6184240.7 2406.17
   4   4   717146.92  732.62
   4   4   875652.68 1724.42
   4   4   9 7442.90  615.07
   4   4  10 3169.53  357.04
   4   4  11  782.12  130.78
   4   4  12 8562.09  555.79
   4   4  1310258.33  718.72
   4   4  14 2991.22  417.83
   4   4  15 6646.90  807.70
   4   4  1613281.38 1224.90
   4   4  1716604.63 1389.56
   4   4  18 1808.56  509.13
   4   4  19 7667.52  184.27
   4   4  20 1316.66   83.70
   4   4  21 3188.92  112.59
   4   4  22 1076.68   77.79
   4   4  23 8788.09  220.12
   4   4  24    0.21   38.68
   4   4  25 1447.46   92.60
   4   4  26  545.08   64.91
   4   4  27    5.18   43.77
   4   4  28 6894.96  190.56
   4   4  29  309.20   57.21
   4   4  30 2153.70  107.96
   4   4  31 1566.20   99.49
   4   4  32  120.49   45.58
   4   4  33  235.15   39.70
   4   4  34    2.79   30.86
   4   4  35 2585.40  138.24
   4   4  36  655.45   67.73
   4   5   477798.47 3547.77
   4   5   5100050.8 3160.00
   4   5   6174568.7 4369.50
   4   5   775381.98 1774.11
   4   5   8 3639.09  380.55
   4   5   9 1124.44  308.43
   4   5  10  352.88  180.60
   4   5  11 1981.38  433.00
   4   5  12 2726.73  516.88
   4   5  13 6406.61  659.12
   4   5  1440473.35 2241.05
   4   5  15 1803.85  442.57
   4   5  16  460.67  245.11
   4   5  17  717.85  430.54
   4   5  18  230.88   46.77
   4   5  19  582.30   59.01
   4   5  20   17.20   35.69
   4   5  21    4.76   37.77
   4   5  22 4011.96  147.09
   4   5  23    0.22   37.82
   4   5  24  275.28   47.96
   4   5  25 1517.09   69.49
   4   5  26 1367.64   80.68
   4   5  27  253.44   48.90
   4   5  28  949.20   84.82
   4   5  29    0.32   42.62
   4   5  30 2381.51  115.72
   4   5  31   37.61   34.99
   4   5  32   74.44   35.50
   4   5  33  792.93   64.26
   4   5  34    1.42   46.98
   4   5  35   13.39   23.52
   4   6   450387.71 3040.13
   4   6   511454.72 1455.18
   4   6   6  449.59  285.56
   4   6   711616.73  749.03
   4   6   812438.71  855.22
   4   6   9 3519.36  432.90
   4   6  1024876.51 1122.96
   4   6  1131161.27 1387.44
   4   6  12 6250.95  657.94
   4   6  1328464.30 1269.97
   4   6  14 8046.90  796.45
   4   6  1518214.60 1097.71
   4   6  16 3072.70  604.30
   4   6  17 4631.83  170.78
   4   6  18 2179.92   96.26
   4   6  19 4548.79  135.87
   4   6  20 2884.59  114.70
   4   6  21  796.51   57.61
   4   6  22 1306.20   81.25
   4   6  23  700.76   57.64
   4   6  24   93.78   45.10
   4   6  25 1645.35   86.19
   4   6  26  551.88   59.86
   4   6  27   16.50   44.19
   4   6  28    5.76   41.48
   4   6  29  366.71   41.99
   4   6  30    7.89   36.32
   4   6  31    0.16   37.35
   4   6  32   42.23   33.30
   4   6  33  234.17   32.19
   4   6  34   10.46   22.37
   4   6  35    1.15   25.37
   4   7   4  218.89  313.06
   4   7   513052.77 1660.27
   4   7   6 1035.20  351.08
   4   7   7   14.78  229.66
   4   7   8 5775.32 1023.32
   4   7   973673.00 2666.87
   4   7  1022894.67 1439.12
   4   7  11 7066.80  819.83
   4   7  12 1805.42  534.90
   4   7  1356960.16 3711.20
   4   7  14 2733.12  525.60
   4   7  15 9715.84  351.29
   4   7  16 2657.77  137.50
   4   7  17 4353.46  126.95
   4   7  18  843.48   79.04
   4   7  19 3767.13  138.96
   4   7  20 6755.36  202.98
   4   7  21 4688.92  212.61
   4   7  22 4213.87  142.85
   4   7  2319872.79  324.87
   4   7  24 2537.75  125.54
   4   7  25 1688.70  105.40
   4   7  26   23.71   49.99
   4   7  27 1143.79   83.64
   4   7  28   28.02   42.12
   4   7  29  107.68   36.28
   4   7  30   49.85   32.82
   4   7  31  300.56   38.81
   4   7  32  587.34   53.51
   4   7  33    1.12   28.45
   4   7  34   23.65   21.95
   4   8   4  122.55  283.31
   4   8   5 3064.09  708.53
   4   8   614530.75 1411.63
   4   8   7 9577.50 1308.27
   4   8   816536.11 1793.05
   4   8   9 6904.84  826.37
   4   8  10 7363.57  958.57
   4   8  1126621.86 1764.38
   4   8  1269439.39 2698.76
   4   8  13 6156.74  887.73
   4   8  14 2284.00  121.37
   4   8  15 9017.05  196.94
   4   8  16  484.33   42.99
   4   8  17 5951.88  185.77
   4   8  18 2861.64  114.11
   4   8  19    6.60   41.15
   4   8  2011035.96  268.58
   4   8  2111999.65  263.37
   4   8  22   73.68   40.21
   4   8  23  300.61   44.61
   4   8  24 7658.09  218.91
   4   8  25 5483.32  167.29
   4   8  26  412.46   48.78
   4   8  27  136.52   52.04
   4   8  28  400.97   59.36
   4   8  29   58.44   34.96
   4   8  30  933.91   61.14
   4   8  31   93.21   39.78
   4   8  32  482.23   35.37
   4   8  33  363.87   35.12
   4   9   4   50.56  216.19
   4   9   5  313.60  297.86
   4   9   6  576.44  417.04
   4   9   711065.67 1356.74
   4   9   810825.40 1497.48
   4   9   9 3468.38  932.83
   4   9  1035417.18 1951.68
   4   9  11 5658.56  808.84
   4   9  1213074.20  247.36
   4   9  13  273.15   51.83
   4   9  14 8246.57  167.84
   4   9  15 1209.76   50.47
   4   9  16  885.52   57.81
   4   9  17  435.29   51.45
   4   9  18 1197.51  101.34
   4   9  19  224.27   40.19
   4   9  20  260.19   44.36
   4   9  21  913.15   80.37
   4   9  2219206.33  536.52
   4   9  23  148.55   47.80
   4   9  24 1296.58  100.49
   4   9  25  320.74   52.52
   4   9  26 1421.09   91.60
   4   9  27   42.22   35.72
   4   9  28  741.76   71.94
   4   9  29    1.51   32.72
   4   9  30  858.88   59.62
   4   9  31   96.09   24.19
   4   9  32  265.19   31.58
   4   9  33  110.22   46.08
   4  10   4 7106.18 1208.53
   4  10   510923.58 1522.37
   4  10   6 7682.95 1142.10
   4  10   7  340.64  318.44
   4  10   8  765.32  296.90
   4  10   9 2510.69  129.44
   4  10  10  896.52   75.71
   4  10  11 6279.31  151.44
   4  10  12 5054.47  143.42
   4  10  13   51.42   48.05
   4  10  14  210.16   26.67
   4  10  15 1090.41   57.60
   4  10  16   49.99   39.81
   4  10  17  393.13   35.50
   4  10  18  225.84   41.04
   4  10  19 2611.16  130.71
   4  10  20 2837.38  122.66
   4  10  21 2234.15  108.08
   4  10  22 1544.45   96.89
   4  10  23 1034.64   77.86
   4  10  24  962.55   86.30
   4  10  25 1072.74   76.39
   4  10  26  245.63   50.99
   4  10  27   10.15   30.29
   4  10  28    1.10   25.10
   4  10  29   45.19   28.38
   4  10  30  123.51   32.71
   4  10  31    9.83   22.29
   4  10  32  158.17   57.91
   4  11   4 6878.11  276.28
   4  11   524350.12  407.57
   4  11   6 1030.72   82.79
   4  11   7  234.70   37.87
   4  11   815693.73  255.12
   4  11   9  174.82   30.92
   4  11  10 1641.58  101.47
   4  11  11  270.43   34.02
   4  11  12  643.18   48.21
   4  11  13    0.54   32.21
   4  11  14   14.13   33.44
   4  11  15  285.63   43.06
   4  11  16    1.19   42.78
   4  11  17   90.22   59.03
   4  11  18  338.08   49.91
   4  11  19 3192.14  166.51
   4  11  20 1210.01  105.42
   4  11  21  737.49   70.02
   4  11  22    7.63   42.90
   4  11  23  701.69   74.58
   4  11  24   68.48   34.09
   4  11  25   86.88   68.65
   4  11  26   18.09   28.89
   4  11  27 2166.61   82.62
   4  11  28   75.67   26.49
   4  11  29    2.30   36.16
   4  11  30   91.22   23.06
   4  12   411912.07  231.64
   4  12   5 4409.19  145.96
   4  12   6 1023.14   64.93
   4  12   721915.77  296.96
   4  12   8 7889.17  169.93
   4  12   9  455.17   44.55
   4  12  10  260.44   49.46
   4  12  11 1860.03  112.89
   4  12  12  264.90   45.04
   4  12  13    5.33   36.04
   4  12  14  104.63   40.34
   4  12  15  131.95   44.52
   4  12  16 1200.97   91.82
   4  12  17 1424.93  112.96
   4  12  18 1397.77  103.53
   4  12  19   37.71   44.20
   4  12  20 1224.60  102.58
   4  12  21  297.82   59.07
   4  12  22  322.35   60.80
   4  12  23  243.43   56.50
   4  12  24  189.99   45.48
   4  12  25 1171.74   79.43
   4  12  26  160.97   32.02
   4  12  27   90.92   35.17
   4  12  28 2382.39  133.38
   4  12  29 5657.36  235.84
   4  13   420070.25  316.82
   4  13   5 7899.97  183.55
   4  13   619763.21  296.10
   4  13   7  932.36   62.78
   4  13   8 4403.59  138.79
   4  13   9  969.45   70.25
   4  13  10 9104.17  220.83
   4  13  11  372.86   54.53
   4  13  12  360.29   64.03
   4  13  13  397.21   51.98
   4  13  14  476.87   59.49
   4  13  15  673.70   83.10
   4  13  16  487.54   66.17
   4  13  17 1858.18  127.63
   4  13  18 1594.14  110.02
   4  13  19 1010.20   84.22
   4  13  20  450.03   55.43
   4  13  21  181.73   58.17
   4  13  22   34.00   40.11
   4  13  23    4.12   38.20
   4  13  24   21.89   38.34
   4  13  25   75.93   28.93
   4  13  26 4788.97  120.08
   4  13  27  338.39   32.87
   4  13  28 2663.60  183.68
   4  14   4 7277.04  177.21
   4  14   5  145.81   38.93
   4  14   6 7062.73  201.84
   4  14   7 6691.53  191.39
   4  14   813895.20  261.83
   4  14   9  178.63   40.86
   4  14  10    4.93   41.61
   4  14  11  473.86   69.59
   4  14  12 1128.30   93.02
   4  14  13  383.95   59.85
   4  14  14  315.33   69.18
   4  14  15 3786.41  164.72
   4  14  16  494.27   77.63
   4  14  17 1276.76  101.68
   4  14  18    1.90   44.00
   4  14  19 1553.33   96.86
   4  14  20  310.93   44.79
   4  14  21    5.72   38.59
   4  14  22  145.90   39.39
   4  14  23  105.89   35.04
   4  14  24  303.91   30.77
   4  14  25  977.29   53.12
   4  14  26  813.29   93.73
   4  15   4    7.44   37.05
   4  15   5 6324.00  173.82
   4  15   6 4842.75  164.58
   4  15   7 1177.57   83.27
   4  15   8  546.18   68.25
   4  15   9 3607.00  151.42
   4  15  10  873.82   76.49
   4  15  11  281.13   55.81
   4  15  12 2582.70  149.76
   4  15  13   14.12   42.21
   4  15  14    5.92   57.36
   4  15  15  356.67   63.25
   4  15  16  942.71   93.13
   4  15  17 1382.09   97.94
   4  15  18  110.01   34.96
   4  15  19   15.80   29.92
   4  15  20  103.16   27.64
   4  15  21  667.44   48.94
   4  15  22   95.82   23.88
   4  15  23   20.43   19.57
   4  15  24   13.70   31.41
   4  16   4    0.03   33.86
   4  16   5  938.60   66.59
   4  16   6 4075.01  143.59
   4  16   7 1291.55   93.11
   4  16   8  945.29   84.26
   4  16   9  445.15   57.83
   4  16  10  432.16   66.20
   4  16  11 1598.44  110.91
   4  16  12   47.27   47.12
   4  16  13    0.18   43.68
   4  16  14  493.47   62.28
   4  16  15   70.18   34.38
   4  16  16   74.60   26.69
   4  16  17  137.15   33.44
   4  16  18    0.09   28.60
   4  16  19  449.69   34.64
   4  16  20  212.26   35.75
   4  16  21 1906.09  274.62
   4  16  22   17.17   29.83
   4  17   4  842.44   72.96
   4  17   5  204.77   41.55
   4  17   6    3.27   39.93
   4  17   7 1679.40  107.80
   4  17   8   87.24   41.44
   4  17   9  446.88   63.67
   4  17  10  228.30   52.06
   4  17  11    0.01   41.29
   4  17  12  334.69   49.63
   4  17  13  984.85   82.19
   4  17  14 1582.17  110.00
   4  17  15  714.66   61.42
   4  17  16  155.61   33.64
   4  17  17  240.13   35.61
   4  17  18  298.91   36.85
   4  17  19    0.69   38.51
   4  18   4   87.13   41.77
   4  18   5 2365.95  118.53
   4  18   6    7.74   28.00
   4  18   7    0.12   30.19
   4  18   8   34.47   31.36
   4  18   9    0.85   35.22
   4  18  10 1673.68  121.09
   4  18  11  271.63   42.91
   4  18  12 1196.61   77.71
   4  18  13  590.84   51.32
   4  18  14    6.57   25.63
   4  18  15  951.27  143.38
   4  18  16  637.46  100.07
   4  19   4   11.76   23.73
   4  19   5  244.55   28.86
   4  19   6  161.07   59.92
   4  19   7    0.16   30.56
   4  19   8   27.34   21.28
   4  19   9   78.05   34.16
   4  19  10  238.99   29.01
   4  19  11   27.15   30.92
   4  19  12  400.32   79.94
   4  20   4  285.04   73.16
   4  20   5    2.83   35.63
   4  20   6   54.56   54.07
   5   0   520015.21 1557.79
   5   0   764634.50 2666.02
   5   0   925307.60 1953.57
   5   0  11  468.45  420.58
   5   0  13 1914.31  555.03
   5   0  15 3981.29  936.59
   5   0  17 3194.23  922.19
   5   0  19  441.98   69.19
   5   0  21 5101.43  259.39
   5   0  23 1449.50  147.90
   5   0  25 1089.17  114.61
   5   0  27   71.69   51.05
   5   0  29 1493.10  102.85
   5   0  31    7.68   42.16
   5   0  33  236.21   61.89
   5   0  35  443.52   61.93
   5   1   560942.63 1868.35
   5   1   656024.34 1791.92
   5   1   7 2956.89  422.39
   5   1   8 7147.80  818.83
   5   1   915348.62 1063.88
   5   1  10 3234.60  510.25
   5   1  11 1118.68  393.74
   5   1  1215429.23 1192.98
   5   1  13 2619.07  400.02
   5   1  1413386.13 1007.33
   5   1  1519326.84 1216.04
   5   1  16 4257.01  548.74
   5   1  17 1699.54  301.30
   5   1  18 4461.03  165.48
   5   1  19  274.65   38.49
   5   1  20 1990.53  137.96
   5   1  21 6209.22  169.74
   5   1  22  582.44   75.59
   5   1  23 1711.85  118.72
   5   1  24  920.52   92.08
   5   1  25   15.02   42.79
   5   1  26 1381.60   97.83
   5   1  27  300.98   55.39
   5   1  28  940.21   64.95
   5   1  29  142.94   39.38
   5   1  30 1372.49   76.39
   5   1  31 1229.64   66.01
   5   1  32  397.24   44.90
   5   1  33 1024.47   64.23
   5   1  34 1058.10   70.02
   5   1  35  128.26   51.46
   5   2   5  762.37  131.35
   5   2   6  647.63  148.61
   5   2   722995.84 1244.70
   5   2   8105936.7 2706.99
   5   2   945946.31 1811.34
   5   2  10  736.39  226.20
   5   2  1149230.84 1764.75
   5   2  12 7159.17  720.88
   5   2  1324559.67 1243.74
   5   2  14   98.42  164.91
   5   2  1547956.59 2163.72
   5   2  1612479.14  861.09
   5   2  17 5877.44  260.29
   5   2  18  150.09   45.37
   5   2  1913703.54  252.01
   5   2  20    0.29   86.21
   5   2  21   83.17   44.49
   5   2  22 3039.58  135.00
   5   2  23  552.11   81.40
   5   2  24 1981.18  128.82
   5   2  25   16.47   41.89
   5   2  26  425.34   60.70
   5   2  27 2730.34  120.30
   5   2  28   38.88   40.12
   5   2  29 1383.81   80.71
   5   2  30 2612.48  110.41
   5   2  31 4640.98  188.97
   5   2  32   34.70   37.33
   5   2  33 1762.63   88.80
   5   2  34   99.94   46.05
   5   2  35 1886.49  133.32
   5   3   536068.83 1506.66
   5   3   686981.44 2390.39
   5   3   739491.35 1713.89
   5   3   811119.04  861.69
   5   3   911822.84 1052.25
   5   3  10 7708.48  740.48
   5   3  11 9189.02  824.59
   5   3  1233762.23 1306.68
   5   3  1382817.32 2036.68
   5   3  1414935.20  858.24
   5   3  15  636.71  124.17
   5   3  1616493.22  982.63
   5   3  1720284.48  382.60
   5   3  18    8.43   36.73
   5   3  19   30.70   35.19
   5   3  20 1885.17   98.04
   5   3  21 1658.67   94.02
   5   3  22 1652.97   89.80
   5   3  23 1212.25   92.25
   5   3  24  220.95   44.17
   5   3  25  656.51   68.76
   5   3  26 1255.63   78.64
   5   3  27  499.19   59.06
   5   3  28 1476.40  105.27
   5   3  29 5237.81  172.57
   5   3  30 4355.82  155.32
   5   3  31  407.52   42.36
   5   3  32   97.33   41.66
   5   3  33 2938.17  115.58
   5   3  34  891.11   77.81
   5   3  35 1015.50  119.06
   5   4   517922.44 1053.31
   5   4   6  384.63  156.37
   5   4   746751.06 1774.69
   5   4   8 9127.73  839.06
   5   4   9 4634.19  382.43
   5   4  1025407.43 1237.19
   5   4  11 8711.41  671.86
   5   4  12 4320.23  580.66
   5   4  1320107.36 1044.82
   5   4  1425406.59 1510.05
   5   4  1514131.27 1194.41
   5   4  16 1535.79  108.69
   5   4  17 7817.19  184.78
   5   4  18 6514.29  166.24
   5   4  19 1214.71   70.58
   5   4  20  208.29   39.97
   5   4  21 1306.66   73.60
   5   4  22    0.31   47.65
   5   4  23    1.43   40.69
   5   4  24   36.94   43.95
   5   4  25    2.21   47.91
   5   4  26    2.47   43.36
   5   4  27  388.20   56.85
   5   4  28 4867.62  158.41
   5   4  29 3370.03  145.74
   5   4  30   15.14   38.79
   5   4  31 1496.44   91.69
   5   4  32 2008.34   87.04
   5   4  33  140.15   34.56
   5   4  34    0.67   28.16
   5   5   534532.46 1687.24
   5   5   611768.30 1231.26
   5   5   715645.48 1384.88
   5   5   814899.22 1384.20
   5   5   9  737.40  293.18
   5   5  10 2517.78  484.10
   5   5  1122008.85 1459.39
   5   5  12 2674.92  414.58
   5   5  13 3834.17  687.41
   5   5  14 5623.84  850.32
   5   5  1518787.16  462.02
   5   5  16  229.91   37.06
   5   5  17  571.18   64.07
   5   5  18  994.89   59.77
   5   5  19  123.35   53.53
   5   5  20    9.15   43.47
   5   5  21   62.24   39.77
   5   5  22  663.72   51.17
   5   5  23 5659.95  181.04
   5   5  24   75.04   43.09
   5   5  25  303.09   51.92
   5   5  26    2.39   45.49
   5   5  27  741.79   64.09
   5   5  28  249.26   45.94
   5   5  29   99.60   43.63
   5   5  30    0.59   30.78
   5   5  31 2967.11  149.46
   5   5  32   13.12   33.56
   5   5  33   46.60   23.62
   5   5  34   72.40   50.22
   5   6   528602.51 1714.35
   5   6   619948.28 1393.55
   5   6   7  297.11  209.91
   5   6   8  210.74  198.85
   5   6   9  111.76  222.49
   5   6  10  601.91  266.34
   5   6  11 8704.06 1067.12
   5   6  12 8348.34 1012.34
   5   6  13  685.07  417.79
   5   6  14 5574.29  166.81
   5   6  15 7239.28  199.26
   5   6  16 5424.89  159.16
   5   6  17  196.95   44.46
   5   6  18   24.99   38.68
   5   6  19  176.17   46.28
   5   6  20 8528.41  219.45
   5   6  21 4573.62  183.50
   5   6  22 4208.04  163.48
   5   6  23   92.81   51.63
   5   6  24 1281.56   91.26
   5   6  25 1033.00   80.73
   5   6  26 1335.36   85.87
   5   6  27    1.06   53.39
   5   6  28  427.46   61.14
   5   6  29  157.84   41.70
   5   6  30  846.45   66.49
   5   6  31  331.46   39.79
   5   6  32  328.72   40.15
   5   6  33   49.53   21.91
   5   7   5 1502.24  575.76
   5   7   6 1098.84  408.78
   5   7   710398.77 1087.57
   5   7   8  715.71  315.48
   5   7   9 8009.52  931.58
   5   7  10 7816.96  905.38
   5   7  1114371.42 1377.21
   5   7  12  369.73  226.09
   5   7  13  771.75   40.98
   5   7  14 2876.33  104.07
   5   7  15  632.62   33.46
   5   7  16    2.86   36.38
   5   7  17 4776.00  170.68
   5   7  18 5074.04  175.01
   5   7  19   96.43   41.50
   5   7  20 9608.53  262.10
   5   7  21   65.68   53.15
   5   7  2211967.45  370.85
   5   7  23 1535.91  102.53
   5   7  2413965.16  315.54
   5   7  25    0.18   47.02
   5   7  26 1647.70  101.19
   5   7  27   27.21   39.45
   5   7  28   63.85   35.23
   5   7  29  533.74   59.11
   5   7  30   19.53   30.57
   5   7  31   50.05   26.55
   5   7  32  597.21   44.24
   5   7  33  360.92   58.23
   5   8   516249.60 1954.38
   5   8   6  777.24  249.46
   5   8   7 1194.20  411.30
   5   8   8 1283.38  364.11
   5   8   9  973.68  200.25
   5   8  10 2494.89  568.01
   5   8  11  814.93   49.19
   5   8  12 3968.38  117.56
   5   8  13 3327.35  138.66
   5   8  14  187.91   47.21
   5   8  15  142.73   28.18
   5   8  16  764.17   47.13
   5   8  17 5628.27  146.12
   5   8  18 4317.84  140.37
   5   8  19 2216.24  114.85
   5   8  20 4348.70  166.92
   5   8  2121664.51  618.50
   5   8  22 9083.66  245.06
   5   8  23    8.87   48.17
   5   8  24 1602.46  107.62
   5   8  2510973.04  269.68
   5   8  26 3226.98  137.68
   5   8  27  293.74   50.87
   5   8  28  590.24   61.50
   5   8  29    6.46   27.14
   5   8  30  176.77   32.58
   5   8  31   15.11   18.41
   5   8  32  469.90   57.22
   5   9   5 9558.51 1459.02
   5   9   6   33.06  282.84
   5   9   7   20.70  302.20
   5   9   8  108.75   50.98
   5   9   9   87.80   36.58
   5   9  10  414.81   34.12
   5   9  11  669.73   53.22
   5   9  12    1.29   29.45
   5   9  13 2068.68   83.53
   5   9  14  400.19   32.65
   5   9  15 1690.01   88.09
   5   9  16   51.01   33.62
   5   9  17  616.93   63.25
   5   9  18  317.97   53.83
   5   9  1910642.50  360.69
   5   9  20  117.56   54.45
   5   9  21    0.03   47.87
   5   9  22 1434.19   90.36
   5   9  2329525.35  717.23
   5   9  24   29.73   43.98
   5   9  25   85.24   46.24
   5   9  26    0.91   43.70
   5   9  27 1817.62   95.07
   5   9  28    2.27   25.29
   5   9  29   26.57   25.41
   5   9  30  481.72   40.03
   5   9  31  138.04   36.64
   5  10   5 2894.01  111.38
   5  10   6 1337.64   73.94
   5  10   7 2118.73  105.69
   5  10   8  419.39   41.90
   5  10   9   17.55   31.93
   5  10  10  845.59   64.29
   5  10  11   55.84   35.31
   5  10  12    3.67   33.25
   5  10  13  712.02   43.19
   5  10  14   75.65   39.15
   5  10  15 1034.39   67.72
   5  10  16   35.13   34.58
   5  10  17  257.13   45.05
   5  10  18  305.08   47.89
   5  10  19    0.94   45.37
   5  10  20 4397.00  175.29
   5  10  21 4186.56  154.07
   5  10  22 1115.50   91.16
   5  10  23  152.84   44.25
   5  10  24 1687.79  115.44
   5  10  25 2793.92  121.75
   5  10  26  324.46   38.43
   5  10  27    0.24   37.79
   5  10  28   66.34   27.33
   5  10  29   22.20   22.05
   5  10  30  317.76   45.69
   5  11   5 2208.67  102.35
   5  11   622523.31  337.10
   5  11   7  373.36   41.57
   5  11   8  178.31   32.72
   5  11   9  751.41   56.42
   5  11  10 1169.75   62.88
   5  11  11  883.54   61.77
   5  11  12  372.02   56.84
   5  11  13  509.23   46.84
   5  11  14  672.27   57.77
   5  11  15   52.08   46.69
   5  11  16  629.66   63.37
   5  11  17  193.45   44.87
   5  11  18  198.45   51.94
   5  11  19  227.32   57.16
   5  11  20   22.74   40.87
   5  11  21  502.09   55.25
   5  11  22  830.36   78.71
   5  11  23  150.17   56.18
   5  11  24   60.71   34.99
   5  11  25  163.98   31.55
   5  11  26  125.17   25.10
   5  11  27    8.54   30.28
   5  11  28 1299.17   67.89
   5  11  29  163.12   32.79
   5  12   5 8519.12  199.99
   5  12   6 2850.66  115.14
   5  12   7 5301.07  163.20
   5  12   812671.79  245.04
   5  12   9 2405.11  111.09
   5  12  10  961.32   75.03
   5  12  11   69.22   37.14
   5  12  12   73.22   41.60
   5  12  13  417.47   58.47
   5  12  14    3.69   51.14
   5  12  15  328.69   61.36
   5  12  16 3960.11  158.79
   5  12  17  812.98   86.69
   5  12  18  305.08   60.30
   5  12  19  286.00   50.79
   5  12  20  288.53   49.82
   5  12  21  328.18   59.26
   5  12  22 1017.63   91.67
   5  12  23   70.44   40.47
   5  12  24  424.58   58.81
   5  12  25  831.44   54.74
   5  12  26  944.17   46.52
   5  12  27   22.93   25.20
   5  13   532668.61  399.82
   5  13   6 4604.81  142.07
   5  13   715578.35  263.12
   5  13   8   69.70   42.27
   5  13   9 5225.33  164.14
   5  13  10   15.95   41.42
   5  13  11 1581.12   89.06
   5  13  12 2782.42  134.92
   5  13  13    2.81   47.99
   5  13  14  380.51   73.30
   5  13  15 7561.84  208.12
   5  13  16   24.13   52.88
   5  13  17  148.69   49.14
   5  13  18 1264.76   89.89
   5  13  19 5174.72  205.23
   5  13  20   28.90   45.55
   5  13  21   38.23   37.91
   5  13  22    6.60   42.92
   5  13  23 2004.55   99.20
   5  13  24  164.59   39.02
   5  13  25    2.66   21.61
   5  13  26   46.74   21.64
   5  14   510771.91  249.61
   5  14   6 1764.76   85.91
   5  14   712578.85  249.97
   5  14   8 4115.41  156.15
   5  14   912678.29  248.82
   5  14  10 3098.03  120.47
   5  14  11    0.24   40.12
   5  14  12  362.32   66.19
   5  14  13 1274.17  102.42
   5  14  14  529.84   67.78
   5  14  15 1755.45  106.28
   5  14  16   14.94   55.26
   5  14  17 4021.70  159.03
   5  14  18 1785.03   97.48
   5  14  19    4.88   36.37
   5  14  20  231.32   39.78
   5  14  21 1681.99   87.71
   5  14  22   96.96   25.44
   5  14  23   10.92   16.75
   5  14  24  219.36   26.84
   5  15   5  269.27   44.09
   5  15   611425.17  247.19
   5  15   7 6853.64  204.68
   5  15   8  112.73   43.79
   5  15   9   61.18   35.28
   5  15  10 2202.88  100.43
   5  15  11  939.68   80.65
   5  15  12  209.03   45.42
   5  15  13 1100.97   79.25
   5  15  14 1823.58  100.46
   5  15  15  137.75   44.58
   5  15  16 1203.25   95.14
   5  15  17    1.07   43.08
   5  15  18  605.59   48.35
   5  15  19   51.69   22.54
   5  15  20  301.64   47.20
   5  15  21   71.47   20.61
   5  15  22    0.97   33.31
   5  16   5  223.92   40.37
   5  16   6  156.50   43.10
   5  16   7 3352.06  131.45
   5  16   8 7537.47  268.79
   5  16   9  799.66   65.23
   5  16  10    6.14   39.26
   5  16  11    7.42   48.22
   5  16  12  327.22   45.38
   5  16  13   43.74   32.16
   5  16  14   92.19   35.27
   5  16  15  135.71   41.43
   5  16  16  242.53   30.62
   5  16  17   83.57   44.96
   5  16  18  534.42   69.07
   5  16  19   77.43   29.21
   5  16  20  240.76   43.99
   5  17   5 2183.76  110.64
   5  17   6 1559.07   93.58
   5  17   7   35.62   39.38
   5  17   8    0.19   36.90
   5  17   9   19.05   45.65
   5  17  10  108.26   37.15
   5  17  11  254.43   51.40
   5  17  12  653.68   52.74
   5  17  13  823.06   61.48
   5  17  14    2.25   29.36
   5  17  15  279.60   43.01
   5  17  16 1045.69  197.79
   5  17  17  260.81   60.72
   5  18   5    4.43   26.94
   5  18   6  113.51   34.00
   5  18   7  343.67   49.08
   5  18   8    1.30   28.47
   5  18   9  102.87   32.50
   5  18  10 1876.58  145.38
   5  18  11  306.63   36.88
   5  18  12  331.82   48.68
   5  18  13  424.90   42.18
   5  18  14 2106.03  304.00
   5  19   5  406.62   46.68
   5  19   6   54.88   41.41
   5  19   7   33.61   25.27
   5  19   8  775.07   74.05
   5  19   9  216.44   42.46
   6   0   6 9654.30  962.59
   6   0   843628.38 2391.47
   6   0  10 3523.70  784.22
   6   0  12 1600.94  516.81
   6   0  1415814.39 1588.17
   6   0  16 5291.74  199.82
   6   0  18 5483.15  219.94
   6   0  20  288.66   70.24
   6   0  22 7340.88  304.74
   6   0  24 1903.11  172.57
   6   0  26 5763.78  245.93
   6   0  28   13.20   62.79
   6   0  30   78.11   53.77
   6   0  32   46.33   36.37
   6   1   683482.77 2295.45
   6   1   754702.33 1893.99
   6   1   8 7226.58  677.90
   6   1   911687.83  886.65
   6   1  10 9368.27  910.61
   6   1  11  117.64  199.39
   6   1  12 8049.61  856.67
   6   1  13 9142.74 1116.31
   6   1  14  501.23  166.44
   6   1  15 7672.31  223.13
   6   1  1610585.34  252.37
   6   1  17  271.57   41.80
   6   1  18 1669.90   89.73
   6   1  19   23.64   37.80
   6   1  20  294.32   44.93
   6   1  21 1620.07  104.42
   6   1  22    0.20   47.81
   6   1  23 5843.30  189.90
   6   1  24 4299.86  164.66
   6   1  25  102.38   41.01
   6   1  26 1703.34   85.99
   6   1  27 2866.91  106.89
   6   1  28  561.32   54.96
   6   1  29  617.68   62.43
   6   1  30  415.39   38.35
   6   1  31  300.15   34.33
   6   1  32  274.51   38.77
   6   1  33  165.75   35.18
   6   2   682856.48 2306.69
   6   2   7  283.07  174.68
   6   2   843628.16 1719.81
   6   2   935825.91 1661.32
   6   2  1078127.88 2548.79
   6   2  11  194.19  184.90
   6   2  1213537.86  999.17
   6   2  1313449.08 1118.26
   6   2  14 6541.93  269.59
   6   2  15   23.97   37.35
   6   2  16   33.89   44.30
   6   2  1711618.40  232.74
   6   2  18   35.21   36.77
   6   2  19 1235.65   82.37
   6   2  20 5248.44  171.01
   6   2  21 1163.62   79.54
   6   2  22  567.45   75.67
   6   2  23  266.24   65.50
   6   2  2410084.40  241.18
   6   2  25 3784.61  147.32
   6   2  26  283.26   45.54
   6   2  27   50.71   36.63
   6   2  28 6402.28  152.12
   6   2  29   12.34   29.38
   6   2  30   77.16   33.33
   6   2  31  176.19   35.10
   6   2  32 1733.32  108.82
   6   2  33    8.72   28.65
   6   3   6  536.94  328.09
   6   3   7 2159.79  383.68
   6   3   893086.95 2580.91
   6   3   947607.36 1928.15
   6   3  1011209.29  975.12
   6   3  11  253.27  256.39
   6   3  1210235.77  780.04
   6   3  13 4596.59  554.91
   6   3  1421845.71  644.79
   6   3  1518030.89  364.52
   6   3  16 1865.56   75.04
   6   3  17  407.13   71.36
   6   3  18 3234.83  126.46
   6   3  19 2836.61  105.35
   6   3  20 2135.52  127.52
   6   3  21  950.51   83.68
   6   3  22 6493.09  187.88
   6   3  23   12.97   48.05
   6   3  24  237.72   58.99
   6   3  25 2734.88  106.13
   6   3  26 7094.88  179.37
   6   3  27 1608.00   98.24
   6   3  28    6.00   38.30
   6   3  29   51.53   38.82
   6   3  30 2354.24   85.80
   6   3  31 1332.52   57.79
   6   3  32    1.31   28.90
   6   3  33   64.00   23.52
   6   4   611506.11 1047.22
   6   4   760891.32 1821.70
   6   4   8 7112.02  566.60
   6   4   9  303.72  163.15
   6   4  10 6956.94  995.18
   6   4  1127398.08 1677.94
   6   4  12 5123.67  694.48
   6   4  13 5595.81  178.95
   6   4  1411013.36  261.92
   6   4  15  898.93   45.59
   6   4  16 3855.14  136.63
   6   4  17  177.31   40.86
   6   4  18 6390.81  165.21
   6   4  19  865.32   64.21
   6   4  20   15.44   46.09
   6   4  21 2073.06  149.14
   6   4  22  471.02   74.05
   6   4  23 5675.86  192.87
   6   4  24  758.69   74.30
   6   4  25 1221.94   79.64
   6   4  26   45.98   37.44
   6   4  27 1089.03   73.68
   6   4  28  139.00   40.54
   6   4  29 2291.69  101.72
   6   4  30  925.87   59.09
   6   4  31   25.65   32.98
   6   4  32   71.33   28.83
   6   4  33    1.74   29.54
   6   5   6 3956.90  700.70
   6   5   7 2237.74  475.01
   6   5   8 4297.69  700.55
   6   5   9  106.98  312.81
   6   5  10 2494.45  665.47
   6   5  11 3945.00  708.67
   6   5  12 1995.25  141.01
   6   5  13  815.51   59.79
   6   5  14 1988.54   97.72
   6   5  15    0.07   44.24
   6   5  16 5213.88  152.86
   6   5  17  283.86   49.77
   6   5  18 1907.58   95.93
   6   5  19   74.47   42.15
   6   5  20  651.01   60.84
   6   5  21  724.12   80.99
   6   5  22  113.75   43.41
   6   5  23  774.06   74.40
   6   5  24 1108.78   85.08
   6   5  25   54.37   44.07
   6   5  26  101.49   40.24
   6   5  27   99.55   32.60
   6   5  28  598.83   52.51
   6   5  29  222.42   48.52
   6   5  30    4.28   37.90
   6   5  31  409.89   42.84
   6   5  32 1377.37  109.99
   6   6   6 7870.99  850.22
   6   6   716300.42 1428.03
   6   6   8 1100.29  384.05
   6   6   9   64.31  159.82
   6   6  10  344.38  137.80
   6   6  11  146.71   36.84
   6   6  12  689.88   49.53
   6   6  13    8.15   45.31
   6   6  14 3318.30  103.90
   6   6  15   87.90   34.48
   6   6  16    3.14   39.06
   6   6  17   40.51   38.60
   6   6  18  581.80   60.75
   6   6  19  624.77   74.73
   6   6  20    8.91   44.64
   6   6  21 5614.85  190.93
   6   6  22  566.70   61.26
   6   6  23  796.73   77.87
   6   6  24   31.04   47.89
   6   6  25  655.64   76.56
   6   6  26    1.40   50.04
   6   6  27   64.64   34.26
   6   6  28  358.55   47.44
   6   6  29 1285.08   67.98
   6   6  30  459.30   46.13
   6   6  31 1811.24  109.24
   6   6  32  948.47   70.80
   6   7   6  817.46  467.13
   6   7   711147.53 1329.32
   6   7   8 5395.21  560.30
   6   7   9   14.03   47.10
   6   7  1013698.10  276.42
   6   7  1114262.88  240.45
   6   7  12 1948.47   92.72
   6   7  13  145.27   29.93
   6   7  14    0.49   30.00
   6   7  15 1575.59   81.70
   6   7  16   90.34   39.63
   6   7  17  687.15   59.87
   6   7  18  183.32   48.16
   6   7  19 7987.18  221.36
   6   7  20  142.75   55.16
   6   7  21 1474.75  121.33
   6   7  22  335.94   62.98
   6   7  2310631.26  228.38
   6   7  24 1331.81   97.00
   6   7  25 1146.85   87.52
   6   7  26  648.66   64.73
   6   7  27   59.41   31.13
   6   7  28  224.06   36.87
   6   7  29 2203.72   93.88
   6   7  30  714.96   51.48
   6   7  31  613.55   50.65
   6   8   6 4336.99  197.14
   6   8   7  320.61   45.78
   6   8   811233.18  221.71
   6   8   911940.01  227.42
   6   8  10 1754.90   93.72
   6   8  11 1671.89   82.57
   6   8  12 7023.72  174.40
   6   8  13 2963.77  102.12
   6   8  14 2521.86  100.05
   6   8  15  118.14   37.19
   6   8  16 1739.92   86.18
   6   8  17 3063.69  124.97
   6   8  18 4836.93  159.47
   6   8  19  189.85   61.37
   6   8  20 1375.68  126.86
   6   8  21 6901.87  198.81
   6   8  22 9889.29  239.28
   6   8  23  580.38   56.35
   6   8  24    0.12   48.59
   6   8  25 2500.08  102.04
   6   8  26 1948.56  110.71
   6   8  27    0.29   38.55
   6   8  28  130.77   32.17
   6   8  29   66.29   31.87
   6   8  30 2379.55  226.21
   6   9   6  233.54   40.06
   6   9   7  843.43   76.68
   6   9   8 9169.30  205.52
   6   9   9  965.48   60.94
   6   9  1014308.97  264.18
   6   9  11    1.42   36.77
   6   9  12 2358.09  102.15
   6   9  13   46.97   34.71
   6   9  14 1389.23   70.59
   6   9  15   16.94   33.16
   6   9  16 4438.37  145.07
   6   9  17   26.31   39.61
   6   9  18 1586.71  110.47
   6   9  19    1.76   63.61
   6   9  20 4986.54  213.38
   6   9  21   37.86   45.76
   6   9  22  891.83   67.75
   6   9  23   42.87   45.25
   6   9  2411059.45  253.44
   6   9  25    4.92   43.15
   6   9  26  200.62   41.56
   6   9  27  255.87   43.92
   6   9  28   51.59   23.91
   6   9  29  121.79   30.95
   6  10   6  433.35   54.25
   6  10   7 2835.08  114.90
   6  10   8 3409.52  124.01
   6  10   9 4908.07  147.18
   6  10  10 1639.31   93.39
   6  10  11   66.45   35.04
   6  10  12  505.05   59.79
   6  10  13  568.08   53.18
   6  10  14    7.18   35.76
   6  10  15   43.08   37.58
   6  10  16    5.66   37.11
   6  10  17    0.30   41.02
   6  10  18    0.12   42.27
   6  10  19   19.30   52.77
   6  10  20  576.44   76.14
   6  10  21  569.21   59.97
   6  10  22 1003.90   85.16
   6  10  23  514.54   59.28
   6  10  24  158.40   49.07
   6  10  25  307.60   71.35
   6  10  26 1198.12   60.75
   6  10  27   52.54   21.62
   6  10  28    0.68   26.75
   6  11   6    0.15   40.48
   6  11   7 8921.39  201.11
   6  11   8  741.07   52.30
   6  11   9   18.70   37.56
   6  11  10    9.82   38.46
   6  11  11  403.20   47.60
   6  11  12  389.08   48.79
   6  11  13  142.73   33.37
   6  11  14    4.35   38.30
   6  11  15 5880.65  176.59
   6  11  16  121.58   45.35
   6  11  17  976.70   86.80
   6  11  18  789.37   72.79
   6  11  19 2757.23  206.02
   6  11  20  689.35   66.54
   6  11  21    0.22   32.53
   6  11  22    8.32   36.41
   6  11  23  582.50   51.15
   6  11  24  153.92   27.18
   6  11  25  132.45   32.41
   6  11  26   26.69   32.40
   6  11  27   23.22   18.84
   6  12   6    2.26   36.98
   6  12   7  490.16   54.15
   6  12   8 3573.38  135.44
   6  12   9 1148.71   81.42
   6  12  10  377.30   47.81
   6  12  11  859.29   78.55
   6  12  12 1129.80   80.27
   6  12  13 5293.23  167.59
   6  12  14 1460.24  105.05
   6  12  15  484.76   63.05
   6  12  16 2920.64  137.21
   6  12  1713199.06  423.98
   6  12  18 1962.91  109.54
   6  12  19 1113.81   87.84
   6  12  20  416.74   51.77
   6  12  21  480.07   55.29
   6  12  22  659.12   56.76
   6  12  23  491.63   46.71
   6  12  24  199.21   34.94
   6  12  25    5.52   19.00
   6  13   612495.91  220.92
   6  13   7 1405.81   89.04
   6  13   8   99.41   39.34
   6  13   9  441.42   42.50
   6  13  10   19.05   41.14
   6  13  11  367.69   52.92
   6  13  12 1893.98   93.29
   6  13  13 1198.29   77.05
   6  13  14 6692.38  188.07
   6  13  15  816.53   82.46
   6  13  1618079.62  387.72
   6  13  17  857.83   70.06
   6  13  18 4464.42  332.59
   6  13  19  535.79   62.79
   6  13  20 6730.91  225.53
   6  13  21  603.81   54.42
   6  13  22  146.35   34.01
   6  13  23    0.13   24.27
   6  13  24   45.09   30.01
   6  14   6 1975.86   96.27
   6  14   7 1931.07  100.48
   6  14   8 3226.37  124.92
   6  14   9  243.19   45.35
   6  14  10  582.17   58.10
   6  14  11 1288.25   89.50
   6  14  12 1437.63   73.61
   6  14  13 4398.92  155.94
   6  14  14 9655.66  318.88
   6  14  15  251.44   53.34
   6  14  16 5244.84  300.87
   6  14  17 1419.46  141.91
   6  14  18 6856.34  455.88
   6  14  19  104.83   31.28
   6  14  20   97.80   23.23
   6  14  21  480.85   51.07
   6  14  22  147.59   61.88
   6  15   6  737.59   58.88
   6  15   7 2557.20  110.86
   6  15   8 1507.83   84.06
   6  15   9   98.56   33.97
[truncated: 33,272 more chars]
