# Supplementary material
Source: MDPI journal article supplement (https://www.mdpi.com/2304-6740/3/2/82)
Supplement: s2 [file s2]

data_mh1-139-2
_publ_requested_journal          Inorganics
_publ_contact_author_name        'Dr Chris Ritchie'
_publ_contact_author_address     
;School of Chemistry
The University of Melbourne
Parkville
Victoria
3010
Australia
;
_publ_contact_author_email       critchie@unimelb.edu.au
_publ_contact_author_phone       +61390357419
loop_
_publ_author_name
_publ_author_address
'Healey, Merinda R.'
;School of Chemistry
The University of Melbourne
Parkville
Victoria
3010
Australia
;
'Goerigk, Lars'
;School of Chemistry
The University of Melbourne
Parkville
Victoria
3010
Australia
;
_audit_creation_date             2015-03-19
_audit_creation_method           
;
Olex2 1.2
(compiled 2015.01.26 svn.r3150 for OlexSys, GUI svn.r4998)
;
_publ_section_references         
;
Dolomanov, O.V., Bourhis, L.J., Gildea, R.J, Howard, J.A.K. & Puschmann, H.
 (2009), J. Appl. Cryst. 42, 339-341.

Sheldrick, G.M. (2008). Acta Cryst. A64, 112-122.
;
_chemical_name_common            ?
_chemical_name_systematic        ?
_chemical_formula_moiety         'C26 H22 Br N S'
_chemical_formula_sum            'C26 H22 Br N S'
_chemical_formula_weight         460.41
_chemical_melting_point          ?
_chemical_oxdiff_formula         'C26 H22 N S Br'
loop_
_atom_type_symbol
_atom_type_description
_atom_type_scat_dispersion_real
_atom_type_scat_dispersion_imag
_atom_type_scat_source
C C 0.0033 0.0016 'International Tables Vol C Tables 4.2.6.8 and 6.1.1.4'
H H 0.0000 0.0000 'International Tables Vol C Tables 4.2.6.8 and 6.1.1.4'
N N 0.0061 0.0033 'International Tables Vol C Tables 4.2.6.8 and 6.1.1.4'
S S 0.1246 0.1234 'International Tables Vol C Tables 4.2.6.8 and 6.1.1.4'
Br Br -0.2901 2.4595 'International Tables Vol C Tables 4.2.6.8 and 6.1.1.4'

_shelx_space_group_comment       
;
The symmetry employed for this shelxl refinement is uniquely defined
by the following loop, which should always be used as a source of
symmetry information in preference to the above space-group names.
They are only intended as comments.
;
_space_group_crystal_system      monoclinic
_space_group_IT_number           14
_space_group_name_H-M_alt        'P 1 21/n 1'
_space_group_name_Hall           '-P 2yn'
loop_
_space_group_symop_operation_xyz
'x, y, z'
'-x+1/2, y+1/2, -z+1/2'
'-x, -y, -z'
'x-1/2, -y-1/2, z-1/2'

_cell_length_a                   12.5989(5)
_cell_length_b                   11.5694(5)
_cell_length_c                   15.2670(6)
_cell_angle_alpha                90
_cell_angle_beta                 101.954(4)
_cell_angle_gamma                90
_cell_volume                     2177.07(16)
_cell_formula_units_Z            4
_cell_measurement_reflns_used    3914
_cell_measurement_temperature    130.10(10)
_cell_measurement_theta_max      29.0390
_cell_measurement_theta_min      3.7800
_shelx_estimated_absorpt_T_max   ?
_shelx_estimated_absorpt_T_min   ?
_exptl_absorpt_coefficient_mu    1.996
_exptl_absorpt_correction_T_max  0.845
_exptl_absorpt_correction_T_min  0.620
_exptl_absorpt_correction_type   gaussian
_exptl_absorpt_process_details   
;
CrysAlisPro, Agilent Technologies,
Version 1.171.37.35 (release 13-08-2014 CrysAlis171 .NET)
(compiled Aug 13 2014,18:06:01)
Numerical absorption correction based on gaussian integration over
			a multifaceted crystal model
Empirical absorption correction using spherical harmonics,
 implemented in SCALE3 ABSPACK scaling algorithm.
;
_exptl_absorpt_special_details   ?
_exptl_crystal_colour            ?
_exptl_crystal_density_diffrn    1.405
_exptl_crystal_density_meas      ?
_exptl_crystal_density_method    ?
_exptl_crystal_F_000             944
_exptl_crystal_size_max          0.411
_exptl_crystal_size_mid          0.2013
_exptl_crystal_size_min          0.0893
_exptl_transmission_factor_max   ?
_exptl_transmission_factor_min   ?
_diffrn_reflns_av_R_equivalents  0.0434
_diffrn_reflns_av_unetI/netI     0.0664
_diffrn_reflns_Laue_measured_fraction_full 0.998
_diffrn_reflns_Laue_measured_fraction_max 0.877
_diffrn_reflns_limit_h_max       17
_diffrn_reflns_limit_h_min       -10
_diffrn_reflns_limit_k_max       15
_diffrn_reflns_limit_k_min       -14
_diffrn_reflns_limit_l_max       18
_diffrn_reflns_limit_l_min       -20
_diffrn_reflns_number            13627
_diffrn_reflns_point_group_measured_fraction_full 0.998
_diffrn_reflns_point_group_measured_fraction_max 0.877
_diffrn_reflns_theta_full        25.242
_diffrn_reflns_theta_max         30.228
_diffrn_reflns_theta_min         2.937
_diffrn_ambient_environment      air
_diffrn_ambient_temperature      293.18(10)
_diffrn_detector                 'CCD plate'
_diffrn_detector_area_resol_mean 10.2273
_diffrn_detector_type            Atlas
_diffrn_measured_fraction_theta_full 0.998
_diffrn_measured_fraction_theta_max 0.877
_diffrn_measurement_details      
;
#__ type_ start__ end____ width___ exp.time_
  1 omega  -27.00   92.00   1.0000   10.0000
omega____ theta____ kappa____ phi______ frames
    -       13.0310   19.0000 -120.0000 119

#__ type_ start__ end____ width___ exp.time_
  2 omega  -22.00    4.00   1.0000   10.0000
omega____ theta____ kappa____ phi______ frames
    -       13.0310  -38.0000  -90.0000 26

#__ type_ start__ end____ width___ exp.time_
  3 omega  -20.00   22.00   1.0000   10.0000
omega____ theta____ kappa____ phi______ frames
    -      -13.2653  -99.0000   60.0000 42

#__ type_ start__ end____ width___ exp.time_
  4 omega  -97.00  -55.00   1.0000   10.0000
omega____ theta____ kappa____ phi______ frames
    -      -13.2653  178.0000 -180.0000 42
;
_diffrn_measurement_device       'four-circle diffractometer'
_diffrn_measurement_device_type  'SuperNova, Dual, Cu at zero, Atlas'
_diffrn_measurement_method       '\w scans'
_diffrn_orient_matrix_UB_11      0.0390004000
_diffrn_orient_matrix_UB_12      0.0447969000
_diffrn_orient_matrix_UB_13      0.0032805000
_diffrn_orient_matrix_UB_21      -0.0418417000
_diffrn_orient_matrix_UB_22      0.0419187000
_diffrn_orient_matrix_UB_23      -0.0032345000
_diffrn_orient_matrix_UB_31      0.0063525000
_diffrn_orient_matrix_UB_32      -0.0002718000
_diffrn_orient_matrix_UB_33      0.0472200000
_diffrn_radiation_monochromator  mirror
_diffrn_radiation_probe          x-ray
_diffrn_radiation_type           MoK\a
_diffrn_radiation_wavelength     0.71073
_diffrn_source                   'SuperNova (Mo) X-ray Source'
_reflns_Friedel_coverage         0.000
_reflns_Friedel_fraction_full    .
_reflns_Friedel_fraction_max     .
_reflns_number_gt                4272
_reflns_number_total             5687
_reflns_odcompleteness_completeness 99.81
_reflns_odcompleteness_iscentric 1
_reflns_odcompleteness_theta     26.32
_reflns_special_details          
;
 Reflections were merged by SHELXL according to the crystal
 class for the calculation of statistics and refinement.
 
 _reflns_Friedel_fraction is defined as the number of unique
 Friedel pairs measured divided by the number that would be
 possible theoretically, ignoring centric projections and
 systematic absences.
;
_reflns_threshold_expression     'I > 2\s(I)'
_computing_cell_refinement       
;
CrysAlisPro, Agilent Technologies,
Version 1.171.37.35 (release 13-08-2014 CrysAlis171 .NET)
(compiled Aug 13 2014,18:06:01)
;
_computing_data_collection       
;
CrysAlisPro, Agilent Technologies,
Version 1.171.37.35 (release 13-08-2014 CrysAlis171 .NET)
(compiled Aug 13 2014,18:06:01)
;
_computing_data_reduction        
;
CrysAlisPro, Agilent Technologies,
Version 1.171.37.35 (release 13-08-2014 CrysAlis171 .NET)
(compiled Aug 13 2014,18:06:01)
;
_computing_molecular_graphics    'Olex2 (Dolomanov et al., 2009)'
_computing_publication_material  'Olex2 (Dolomanov et al., 2009)'
_computing_structure_refinement  'ShelXL (Sheldrick, 2008)'
_computing_structure_solution    'ShelXS (Sheldrick, 2008)'
_refine_diff_density_max         0.770
_refine_diff_density_min         -0.862
_refine_diff_density_rms         0.268
_refine_ls_extinction_coef       .
_refine_ls_extinction_method     none
_refine_ls_goodness_of_fit_ref   1.151
_refine_ls_hydrogen_treatment    constr
_refine_ls_matrix_type           full
_refine_ls_number_parameters     265
_refine_ls_number_reflns         5687
_refine_ls_number_restraints     0
_refine_ls_R_factor_all          0.0769
_refine_ls_R_factor_gt           0.0497
_refine_ls_restrained_S_all      1.151
_refine_ls_shift/su_max          0.000
_refine_ls_shift/su_mean         0.000
_refine_ls_structure_factor_coef Fsqd
_refine_ls_weighting_details     
'w=1/[\s^2^(Fo^2^)+(0.0882P)^2^] where P=(Fo^2^+2Fc^2^)/3'
_refine_ls_weighting_scheme      calc
_refine_ls_wR_factor_gt          0.1394
_refine_ls_wR_factor_ref         0.1727
_refine_special_details          ?
_olex2_refinement_description    
;
1. Fixed Uiso
 At 1.2 times of:
  All C(H) groups
 At 1.5 times of:
  All C(H,H,H) groups
2.a Aromatic/amide H refined with riding coordinates:
 C3(H3), C4(H4), C5(H5), C6(H6), C7(H7), C9(H9), C10(H10), C11(H11), C12(H12),
 C13(H13), C16(H16), C18(H18), C23(H23)
2.b Idealised Me refined as rotating group:
 C20(H20A,H20B,H20C), C21(H21A,H21B,H21C), C26(H26A,H26B,H26C)
;
_atom_sites_solution_hydrogens   geom
_atom_sites_solution_primary     direct
_atom_sites_solution_secondary   ?
loop_
_atom_site_label
_atom_site_type_symbol
_atom_site_fract_x
_atom_site_fract_y
_atom_site_fract_z
_atom_site_U_iso_or_equiv
_atom_site_adp_type
_atom_site_occupancy
_atom_site_site_symmetry_order
_atom_site_calc_flag
_atom_site_refinement_flags_posn
_atom_site_refinement_flags_adp
_atom_site_refinement_flags_occupancy
_atom_site_disorder_assembly
_atom_site_disorder_group
C1 C 0.5942(3) 1.0783(3) -0.3011(2) 0.0219(7) Uani 1 1 d . . . . .
C2 C 0.5463(3) 1.1655(3) -0.3695(2) 0.0235(7) Uani 1 1 d . . . . .
C3 C 0.4359(3) 1.1923(4) -0.3822(2) 0.0338(9) Uani 1 1 d . . . . .
H3 H 0.3924 1.1537 -0.3493 0.041 Uiso 1 1 calc R . . . .
C4 C 0.3912(3) 1.2758(4) -0.4432(2) 0.0406(10) Uani 1 1 d . . . . .
H4 H 0.3176 1.2927 -0.4515 0.049 Uiso 1 1 calc R . . . .
C5 C 0.4547(3) 1.3349(4) -0.4924(2) 0.0364(9) Uani 1 1 d . . . . .
H5 H 0.4241 1.3918 -0.5329 0.044 Uiso 1 1 calc R . . . .
C6 C 0.5633(3) 1.3087(4) -0.4809(2) 0.0347(9) Uani 1 1 d . . . . .
H6 H 0.6063 1.3478 -0.5139 0.042 Uiso 1 1 calc R . . . .
C7 C 0.6089(3) 1.2241(3) -0.4200(2) 0.0279(8) Uani 1 1 d . . . . .
H7 H 0.6822 1.2064 -0.4130 0.033 Uiso 1 1 calc R . . . .
C8 C 0.7020(3) 1.0264(3) -0.3053(2) 0.0224(7) Uani 1 1 d . . . . .
C9 C 0.7870(3) 1.0267(3) -0.2300(2) 0.0265(7) Uani 1 1 d . . . . .
H9 H 0.7780 1.0632 -0.1778 0.032 Uiso 1 1 calc R . . . .
C10 C 0.8844(3) 0.9729(4) -0.2328(2) 0.0330(9) Uani 1 1 d . . . . .
H10 H 0.9408 0.9742 -0.1828 0.040 Uiso 1 1 calc R . . . .
C11 C 0.8978(3) 0.9168(3) -0.3105(3) 0.0354(9) Uani 1 1 d . . . . .
H11 H 0.9625 0.8788 -0.3119 0.042 Uiso 1 1 calc R . . . .
C12 C 0.8148(3) 0.9180(3) -0.3851(3) 0.0331(8) Uani 1 1 d . . . . .
H12 H 0.8241 0.8815 -0.4373 0.040 Uiso 1 1 calc R . . . .
C13 C 0.7185(3) 0.9725(3) -0.3830(2) 0.0289(8) Uani 1 1 d . . . . .
H13 H 0.6636 0.9735 -0.4342 0.035 Uiso 1 1 calc R . . . .
C14 C 0.5744(2) 0.9667(3) -0.17434(19) 0.0202(6) Uani 1 1 d . . . . .
C15 C 0.6014(2) 1.0073(3) -0.08523(19) 0.0211(7) Uani 1 1 d . . . . .
C16 C 0.6273(2) 0.9260(3) -0.0168(2) 0.0211(7) Uani 1 1 d . . . . .
H16 H 0.6458 0.9514 0.0422 0.025 Uiso 1 1 calc R . . . .
C17 C 0.6262(2) 0.8082(3) -0.03422(19) 0.0198(6) Uani 1 1 d . . . . .
C18 C 0.5973(2) 0.7708(3) -0.12306(19) 0.0201(6) Uani 1 1 d . . . . .
H18 H 0.5962 0.6920 -0.1354 0.024 Uiso 1 1 calc R . . . .
C19 C 0.5701(3) 0.8489(3) -0.1935(2) 0.0214(7) Uani 1 1 d . . . . .
C20 C 0.6028(3) 1.1347(3) -0.0662(2) 0.0241(7) Uani 1 1 d . . . . .
H20A H 0.6131 1.1469 -0.0028 0.036 Uiso 1 1 calc GR . . . .
H20B H 0.5351 1.1683 -0.0956 0.036 Uiso 1 1 calc GR . . . .
H20C H 0.6611 1.1704 -0.0880 0.036 Uiso 1 1 calc GR . . . .
C21 C 0.5365(3) 0.8032(3) -0.2880(2) 0.0289(8) Uani 1 1 d . . . . .
H21A H 0.5985 0.8011 -0.3155 0.043 Uiso 1 1 calc GR . . . .
H21B H 0.4821 0.8528 -0.3220 0.043 Uiso 1 1 calc GR . . . .
H21C H 0.5076 0.7266 -0.2866 0.043 Uiso 1 1 calc GR . . . .
C22 C 0.6518(2) 0.7222(3) 0.03816(19) 0.0191(6) Uani 1 1 d . . . . .
C23 C 0.6251(3) 0.6088(3) 0.0366(2) 0.0220(7) Uani 1 1 d . . . . .
H23 H 0.5841 0.5715 -0.0130 0.026 Uiso 1 1 calc R . . . .
C24 C 0.6669(3) 0.5532(3) 0.1197(2) 0.0219(7) Uani 1 1 d . . . . .
C25 C 0.7240(3) 0.6213(3) 0.1845(2) 0.0254(7) Uani 1 1 d . . . . .
C26 C 0.7790(3) 0.5909(3) 0.2789(2) 0.0307(8) Uani 1 1 d . . . . .
H26A H 0.8331 0.6480 0.3014 0.046 Uiso 1 1 calc GR . . . .
H26B H 0.8129 0.5165 0.2793 0.046 Uiso 1 1 calc GR . . . .
H26C H 0.7262 0.5887 0.3160 0.046 Uiso 1 1 calc GR . . . .
N1 N 0.5394(2) 1.0520(3) -0.24146(16) 0.0223(6) Uani 1 1 d . . . . .
S1 S 0.72688(8) 0.76004(8) 0.14327(5) 0.0279(2) Uani 1 1 d . . . . .
Br1 Br 0.64142(3) 0.39475(3) 0.13811(2) 0.02953(15) Uani 1 1 d . . . . .

loop_
_atom_site_aniso_label
_atom_site_aniso_U_11
_atom_site_aniso_U_22
_atom_site_aniso_U_33
_atom_site_aniso_U_23
_atom_site_aniso_U_13
_atom_site_aniso_U_12
C1 0.0234(15) 0.0202(18) 0.0207(15) -0.0014(12) 0.0010(11) -0.0031(14)
C2 0.0256(15) 0.023(2) 0.0205(15) -0.0011(12) 0.0012(12) -0.0001(15)
C3 0.0276(17) 0.043(3) 0.0295(18) 0.0111(16) 0.0024(13) 0.0030(18)
C4 0.0319(19) 0.050(3) 0.038(2) 0.0118(19) 0.0008(15) 0.0091(19)
C5 0.044(2) 0.036(2) 0.0248(17) 0.0069(16) -0.0020(15) 0.007(2)
C6 0.041(2) 0.031(2) 0.0340(19) 0.0107(16) 0.0107(15) 0.0001(18)
C7 0.0290(17) 0.025(2) 0.0298(17) 0.0060(14) 0.0072(13) 0.0025(16)
C8 0.0271(16) 0.0169(18) 0.0238(15) 0.0040(12) 0.0067(12) -0.0015(14)
C9 0.0247(16) 0.029(2) 0.0266(16) 0.0034(14) 0.0057(12) 0.0010(15)
C10 0.0272(17) 0.035(2) 0.0364(19) 0.0115(16) 0.0054(14) 0.0032(17)
C11 0.036(2) 0.023(2) 0.051(2) 0.0092(17) 0.0200(17) 0.0065(18)
C12 0.050(2) 0.0171(19) 0.038(2) 0.0017(15) 0.0227(17) 0.0013(18)
C13 0.0407(19) 0.0201(19) 0.0270(16) 0.0019(14) 0.0093(14) 0.0005(16)
C14 0.0173(13) 0.0211(18) 0.0227(15) 0.0030(13) 0.0054(11) -0.0006(13)
C15 0.0202(14) 0.0196(18) 0.0238(15) -0.0012(12) 0.0051(11) -0.0017(14)
C16 0.0214(14) 0.0232(18) 0.0182(14) -0.0010(12) 0.0030(11) 0.0000(14)
C17 0.0185(13) 0.0191(18) 0.0217(15) 0.0013(12) 0.0041(11) 0.0008(13)
C18 0.0222(15) 0.0142(17) 0.0241(15) 0.0001(12) 0.0054(11) -0.0020(13)
C19 0.0226(14) 0.0203(18) 0.0215(15) -0.0005(12) 0.0049(11) -0.0024(14)
C20 0.0292(16) 0.0161(18) 0.0282(17) 0.0000(13) 0.0085(13) -0.0010(15)
C21 0.0389(19) 0.024(2) 0.0228(16) -0.0001(14) 0.0039(13) -0.0062(17)
C22 0.0226(14) 0.0171(17) 0.0172(14) 0.0003(12) 0.0032(11) 0.0025(13)
C23 0.0262(16) 0.0200(19) 0.0188(15) -0.0005(12) 0.0021(12) 0.0016(14)
C24 0.0244(15) 0.0156(18) 0.0247(15) 0.0023(12) 0.0026(12) 0.0002(14)
C25 0.0289(17) 0.022(2) 0.0245(16) 0.0034(13) 0.0037(13) 0.0027(15)
C26 0.044(2) 0.022(2) 0.0220(16) 0.0038(13) -0.0048(14) -0.0003(16)
N1 0.0240(13) 0.0208(16) 0.0214(13) 0.0021(11) 0.0029(10) -0.0002(12)
S1 0.0373(5) 0.0205(5) 0.0224(4) 0.0005(3) -0.0020(3) -0.0040(4)
Br1 0.0341(2) 0.0202(2) 0.0311(2) 0.00600(13) -0.00053(15) -0.00324(15)

_geom_special_details            
;
 All esds (except the esd in the dihedral angle between two l.s. planes)
 are estimated using the full covariance matrix.  The cell esds are taken
 into account individually in the estimation of esds in distances, angles
 and torsion angles; correlations between esds in cell parameters are only
 used when they are defined by crystal symmetry.  An approximate (isotropic)
 treatment of cell esds is used for estimating esds involving l.s. planes.
;
loop_
_geom_bond_atom_site_label_1
_geom_bond_atom_site_label_2
_geom_bond_distance
_geom_bond_site_symmetry_2
_geom_bond_publ_flag
C1 C2 1.487(5) . ?
C1 C8 1.498(5) . ?
C1 N1 1.289(4) . ?
C2 C3 1.399(5) . ?
C2 C7 1.389(5) . ?
C3 H3 0.9300 . ?
C3 C4 1.379(5) . ?
C4 H4 0.9300 . ?
C4 C5 1.385(6) . ?
C5 H5 0.9300 . ?
C5 C6 1.378(5) . ?
C6 H6 0.9300 . ?
C6 C7 1.390(5) . ?
C7 H7 0.9300 . ?
C8 C9 1.399(4) . ?
C8 C13 1.393(5) . ?
C9 H9 0.9300 . ?
C9 C10 1.384(5) . ?
C10 H10 0.9300 . ?
C10 C11 1.392(5) . ?
C11 H11 0.9300 . ?
C11 C12 1.378(6) . ?
C12 H12 0.9300 . ?
C12 C13 1.374(5) . ?
C13 H13 0.9300 . ?
C14 C15 1.413(4) . ?
C14 C19 1.392(5) . ?
C14 N1 1.425(4) . ?
C15 C16 1.393(5) . ?
C15 C20 1.502(5) . ?
C16 H16 0.9300 . ?
C16 C17 1.388(5) . ?
C17 C18 1.398(4) . ?
C17 C22 1.473(4) . ?
C18 H18 0.9300 . ?
C18 C19 1.392(4) . ?
C19 C21 1.513(4) . ?
C20 H20A 0.9600 . ?
C20 H20B 0.9600 . ?
C20 H20C 0.9600 . ?
C21 H21A 0.9600 . ?
C21 H21B 0.9600 . ?
C21 H21C 0.9600 . ?
C22 C23 1.354(5) . ?
C22 S1 1.741(3) . ?
C23 H23 0.9300 . ?
C23 C24 1.423(4) . ?
C24 C25 1.351(5) . ?
C24 Br1 1.892(4) . ?
C25 C26 1.505(4) . ?
C25 S1 1.727(4) . ?
C26 H26A 0.9600 . ?
C26 H26B 0.9600 . ?
C26 H26C 0.9600 . ?

loop_
_geom_angle_atom_site_label_1
_geom_angle_atom_site_label_2
_geom_angle_atom_site_label_3
_geom_angle
_geom_angle_site_symmetry_1
_geom_angle_site_symmetry_3
_geom_angle_publ_flag
C2 C1 C8 118.8(3) . . ?
N1 C1 C2 117.2(3) . . ?
N1 C1 C8 124.0(3) . . ?
C3 C2 C1 119.7(3) . . ?
C7 C2 C1 121.7(3) . . ?
C7 C2 C3 118.5(3) . . ?
C2 C3 H3 119.9 . . ?
C4 C3 C2 120.2(4) . . ?
C4 C3 H3 119.9 . . ?
C3 C4 H4 119.6 . . ?
C3 C4 C5 120.8(4) . . ?
C5 C4 H4 119.6 . . ?
C4 C5 H5 120.3 . . ?
C6 C5 C4 119.5(4) . . ?
C6 C5 H5 120.3 . . ?
C5 C6 H6 119.9 . . ?
C5 C6 C7 120.1(3) . . ?
C7 C6 H6 119.9 . . ?
C2 C7 C6 120.8(3) . . ?
C2 C7 H7 119.6 . . ?
C6 C7 H7 119.6 . . ?
C9 C8 C1 120.7(3) . . ?
C13 C8 C1 120.8(3) . . ?
C13 C8 C9 118.5(3) . . ?
C8 C9 H9 119.8 . . ?
C10 C9 C8 120.4(3) . . ?
C10 C9 H9 119.8 . . ?
C9 C10 H10 120.0 . . ?
C9 C10 C11 120.1(3) . . ?
C11 C10 H10 120.0 . . ?
C10 C11 H11 120.2 . . ?
C12 C11 C10 119.6(4) . . ?
C12 C11 H11 120.2 . . ?
C11 C12 H12 119.7 . . ?
C13 C12 C11 120.5(3) . . ?
C13 C12 H12 119.7 . . ?
C8 C13 H13 119.6 . . ?
C12 C13 C8 120.9(3) . . ?
C12 C13 H13 119.6 . . ?
C15 C14 N1 116.0(3) . . ?
C19 C14 C15 121.2(3) . . ?
C19 C14 N1 122.3(3) . . ?
C14 C15 C20 120.2(3) . . ?
C16 C15 C14 118.0(3) . . ?
C16 C15 C20 121.7(3) . . ?
C15 C16 H16 119.1 . . ?
C17 C16 C15 121.9(3) . . ?
C17 C16 H16 119.1 . . ?
C16 C17 C18 118.7(3) . . ?
C16 C17 C22 121.9(3) . . ?
C18 C17 C22 119.4(3) . . ?
C17 C18 H18 119.3 . . ?
C19 C18 C17 121.4(3) . . ?
C19 C18 H18 119.3 . . ?
C14 C19 C21 122.2(3) . . ?
C18 C19 C14 118.8(3) . . ?
C18 C19 C21 119.0(3) . . ?
C15 C20 H20A 109.5 . . ?
C15 C20 H20B 109.5 . . ?
C15 C20 H20C 109.5 . . ?
H20A C20 H20B 109.5 . . ?
H20A C20 H20C 109.5 . . ?
H20B C20 H20C 109.5 . . ?
C19 C21 H21A 109.5 . . ?
C19 C21 H21B 109.5 . . ?
C19 C21 H21C 109.5 . . ?
H21A C21 H21B 109.5 . . ?
H21A C21 H21C 109.5 . . ?
H21B C21 H21C 109.5 . . ?
C17 C22 S1 120.9(2) . . ?
C23 C22 C17 128.8(3) . . ?
C23 C22 S1 110.2(2) . . ?
C22 C23 H23 123.9 . . ?
C22 C23 C24 112.2(3) . . ?
C24 C23 H23 123.9 . . ?
C23 C24 Br1 121.9(2) . . ?
C25 C24 C23 115.6(3) . . ?
C25 C24 Br1 122.5(2) . . ?
C24 C25 C26 129.4(3) . . ?
C24 C25 S1 108.9(2) . . ?
C26 C25 S1 121.8(3) . . ?
C25 C26 H26A 109.5 . . ?
C25 C26 H26B 109.5 . . ?
C25 C26 H26C 109.5 . . ?
H26A C26 H26B 109.5 . . ?
H26A C26 H26C 109.5 . . ?
H26B C26 H26C 109.5 . . ?
C1 N1 C14 122.7(3) . . ?
C25 S1 C22 93.10(16) . . ?

loop_
_geom_torsion_atom_site_label_1
_geom_torsion_atom_site_label_2
_geom_torsion_atom_site_label_3
_geom_torsion_atom_site_label_4
_geom_torsion
_geom_torsion_site_symmetry_1
_geom_torsion_site_symmetry_2
_geom_torsion_site_symmetry_3
_geom_torsion_site_symmetry_4
_geom_torsion_publ_flag
C1 C2 C3 C4 177.8(4) . . . . ?
C1 C2 C7 C6 -177.3(3) . . . . ?
C1 C8 C9 C10 176.3(3) . . . . ?
C1 C8 C13 C12 -175.4(3) . . . . ?
C2 C1 C8 C9 127.6(3) . . . . ?
C2 C1 C8 C13 -55.2(5) . . . . ?
C2 C1 N1 C14 177.6(3) . . . . ?
C2 C3 C4 C5 -0.4(6) . . . . ?
C3 C2 C7 C6 0.9(5) . . . . ?
C3 C4 C5 C6 0.8(6) . . . . ?
C4 C5 C6 C7 -0.3(6) . . . . ?
C5 C6 C7 C2 -0.6(6) . . . . ?
C7 C2 C3 C4 -0.5(6) . . . . ?
C8 C1 C2 C3 163.1(3) . . . . ?
C8 C1 C2 C7 -18.7(5) . . . . ?
C8 C1 N1 C14 -2.3(5) . . . . ?
C8 C9 C10 C11 -0.8(6) . . . . ?
C9 C8 C13 C12 1.8(5) . . . . ?
C9 C10 C11 C12 1.8(6) . . . . ?
C10 C11 C12 C13 -0.9(6) . . . . ?
C11 C12 C13 C8 -0.9(6) . . . . ?
C13 C8 C9 C10 -1.0(5) . . . . ?
C14 C15 C16 C17 -0.5(5) . . . . ?
C15 C14 C19 C18 -2.5(5) . . . . ?
C15 C14 C19 C21 177.2(3) . . . . ?
C15 C14 N1 C1 114.0(4) . . . . ?
C15 C16 C17 C18 -0.6(5) . . . . ?
C15 C16 C17 C22 -179.0(3) . . . . ?
C16 C17 C18 C19 0.2(5) . . . . ?
C16 C17 C22 C23 158.7(3) . . . . ?
C16 C17 C22 S1 -21.7(4) . . . . ?
C17 C18 C19 C14 1.4(5) . . . . ?
C17 C18 C19 C21 -178.4(3) . . . . ?
C17 C22 C23 C24 178.7(3) . . . . ?
C17 C22 S1 C25 -178.7(3) . . . . ?
C18 C17 C22 C23 -19.6(5) . . . . ?
C18 C17 C22 S1 160.0(2) . . . . ?
C19 C14 C15 C16 2.1(4) . . . . ?
C19 C14 C15 C20 -178.5(3) . . . . ?
C19 C14 N1 C1 -73.4(4) . . . . ?
C20 C15 C16 C17 -179.9(3) . . . . ?
C22 C17 C18 C19 178.6(3) . . . . ?
C22 C23 C24 C25 0.5(5) . . . . ?
C22 C23 C24 Br1 179.4(2) . . . . ?
C23 C22 S1 C25 1.0(3) . . . . ?
C23 C24 C25 C26 -179.8(4) . . . . ?
C23 C24 C25 S1 0.3(4) . . . . ?
C24 C25 S1 C22 -0.7(3) . . . . ?
C26 C25 S1 C22 179.3(3) . . . . ?
N1 C1 C2 C3 -16.8(5) . . . . ?
N1 C1 C2 C7 161.4(3) . . . . ?
N1 C1 C8 C9 -52.4(5) . . . . ?
N1 C1 C8 C13 124.8(4) . . . . ?
N1 C14 C15 C16 174.7(3) . . . . ?
N1 C14 C15 C20 -5.8(4) . . . . ?
N1 C14 C19 C18 -174.7(3) . . . . ?
N1 C14 C19 C21 5.0(5) . . . . ?
S1 C22 C23 C24 -1.0(4) . . . . ?
Br1 C24 C25 C26 1.3(6) . . . . ?
Br1 C24 C25 S1 -178.60(18) . . . . ?

_shelx_res_file                  
;
    mh1-139-2.res created by SHELXL-2014/7

TITL MH1-139-2 in P21/n #14
REM reset to P21/n #14
CELL 0.71073 12.598876 11.56937 15.266963 90 101.9541 90
ZERR 4 0.000535 0.000493 0.00059 0 0.0037 0
LATT 1
SYMM 0.5-X,0.5+Y,0.5-Z
SFAC C H N S Br
UNIT 104 88 4 4 4

L.S. 10
PLAN  5
BOND
MORE -1
BOND $H
CONF
fmap 2
acta
REM <olex2.extras>
REM <HklSrc "%.\\MH1-139-2.hkl">
REM </olex2.extras>

WGHT    0.088200
FVAR       3.06102
C1    1    0.594216    1.078268   -0.301121    11.00000    0.02335    0.02023 =
         0.02071   -0.00135    0.00101   -0.00305
C2    1    0.546278    1.165466   -0.369482    11.00000    0.02564    0.02275 =
         0.02049   -0.00112    0.00120   -0.00005
C3    1    0.435881    1.192291   -0.382167    11.00000    0.02758    0.04263 =
         0.02951    0.01110    0.00236    0.00297
AFIX  43
H3    2    0.392434    1.153653   -0.349306    11.00000   -1.20000
AFIX   0
C4    1    0.391222    1.275825   -0.443226    11.00000    0.03189    0.04954 =
         0.03764    0.01183    0.00084    0.00913
AFIX  43
H4    2    0.317647    1.292699   -0.451461    11.00000   -1.20000
AFIX   0
C5    1    0.454650    1.334871   -0.492419    11.00000    0.04432    0.03607 =
         0.02482    0.00687   -0.00204    0.00723
AFIX  43
H5    2    0.424103    1.391750   -0.532919    11.00000   -1.20000
AFIX   0
C6    1    0.563345    1.308712   -0.480905    11.00000    0.04073    0.03057 =
         0.03400    0.01067    0.01075    0.00011
AFIX  43
H6    2    0.606314    1.347776   -0.513946    11.00000   -1.20000
AFIX   0
C7    1    0.608923    1.224057   -0.420009    11.00000    0.02898    0.02541 =
         0.02982    0.00598    0.00721    0.00249
AFIX  43
H7    2    0.682221    1.206436   -0.413011    11.00000   -1.20000
AFIX   0
C8    1    0.702042    1.026440   -0.305338    11.00000    0.02709    0.01691 =
         0.02376    0.00396    0.00674   -0.00147
C9    1    0.786997    1.026691   -0.230024    11.00000    0.02469    0.02856 =
         0.02658    0.00336    0.00573    0.00096
AFIX  43
H9    2    0.777989    1.063208   -0.177786    11.00000   -1.20000
AFIX   0
C10   1    0.884356    0.972903   -0.232832    11.00000    0.02720    0.03486 =
         0.03641    0.01146    0.00540    0.00317
AFIX  43
H10   2    0.940838    0.974219   -0.182800    11.00000   -1.20000
AFIX   0
C11   1    0.897819    0.916842   -0.310457    11.00000    0.03619    0.02322 =
         0.05143    0.00920    0.02000    0.00655
AFIX  43
H11   2    0.962469    0.878835   -0.311933    11.00000   -1.20000
AFIX   0
C12   1    0.814822    0.917967   -0.385116    11.00000    0.05002    0.01707 =
         0.03817    0.00170    0.02270    0.00128
AFIX  43
H12   2    0.824066    0.881499   -0.437307    11.00000   -1.20000
AFIX   0
C13   1    0.718548    0.972533   -0.383044    11.00000    0.04068    0.02007 =
         0.02699    0.00194    0.00934    0.00049
AFIX  43
H13   2    0.663631    0.973515   -0.434198    11.00000   -1.20000
AFIX   0
C14   1    0.574359    0.966681   -0.174340    11.00000    0.01733    0.02107 =
         0.02272    0.00304    0.00544   -0.00064
C15   1    0.601424    1.007282   -0.085233    11.00000    0.02021    0.01956 =
         0.02377   -0.00118    0.00508   -0.00175
C16   1    0.627290    0.925982   -0.016846    11.00000    0.02145    0.02321 =
         0.01821   -0.00096    0.00300    0.00005
AFIX  43
H16   2    0.645798    0.951356    0.042155    11.00000   -1.20000
AFIX   0
C17   1    0.626235    0.808219   -0.034222    11.00000    0.01850    0.01912 =
         0.02172    0.00131    0.00411    0.00081
C18   1    0.597275    0.770757   -0.123064    11.00000    0.02224    0.01424 =
         0.02412    0.00014    0.00542   -0.00205
AFIX  43
H18   2    0.596155    0.691985   -0.135365    11.00000   -1.20000
AFIX   0
C19   1    0.570091    0.848896   -0.193463    11.00000    0.02258    0.02029 =
         0.02148   -0.00052    0.00487   -0.00243
C20   1    0.602785    1.134736   -0.066178    11.00000    0.02920    0.01608 =
         0.02825    0.00000    0.00845   -0.00095
AFIX 137
H20A  2    0.613107    1.146941   -0.002778    11.00000   -1.50000
H20B  2    0.535065    1.168318   -0.095564    11.00000   -1.50000
H20C  2    0.661053    1.170388   -0.088016    11.00000   -1.50000
AFIX   0
C21   1    0.536513    0.803158   -0.288028    11.00000    0.03894    0.02396 =
         0.02279   -0.00011    0.00387   -0.00617
AFIX 137
H21A  2    0.598494    0.801071   -0.315479    11.00000   -1.50000
H21B  2    0.482122    0.852828   -0.322002    11.00000   -1.50000
H21C  2    0.507622    0.726561   -0.286589    11.00000   -1.50000
AFIX   0
C22   1    0.651828    0.722178    0.038158    11.00000    0.02263    0.01711 =
         0.01724    0.00032    0.00323    0.00249
C23   1    0.625064    0.608769    0.036606    11.00000    0.02616    0.02000 =
         0.01884   -0.00053    0.00207    0.00165
AFIX  43
H23   2    0.584080    0.571513   -0.013047    11.00000   -1.20000
AFIX   0
C24   1    0.666863    0.553159    0.119692    11.00000    0.02441    0.01559 =
         0.02466    0.00234    0.00258    0.00016
C25   1    0.723981    0.621336    0.184545    11.00000    0.02890    0.02192 =
         0.02448    0.00338    0.00366    0.00267
C26   1    0.779008    0.590859    0.278861    11.00000    0.04351    0.02165 =
         0.02198    0.00382   -0.00476   -0.00030
AFIX 137
H26A  2    0.833056    0.647980    0.301376    11.00000   -1.50000
H26B  2    0.812869    0.516462    0.279344    11.00000   -1.50000
H26C  2    0.726201    0.588694    0.316027    11.00000   -1.50000
AFIX   0
N1    3    0.539356    1.052006   -0.241462    11.00000    0.02402    0.02082 =
         0.02140    0.00209    0.00286   -0.00021
S1    4    0.726876    0.760040    0.143275    11.00000    0.03732    0.02048 =
         0.02237    0.00046   -0.00201   -0.00402
BR1   5    0.641423    0.394745    0.138113    11.00000    0.03409    0.02023 =
         0.03111    0.00600   -0.00053   -0.00324
HKLF 4

REM  MH1-139-2 in P21/n #14
REM R1 =  0.0497 for    4272 Fo > 4sig(Fo)  and  0.0769 for all    5687 data
REM    265 parameters refined using      0 restraints

END

WGHT      0.0883      0.0000

REM Highest difference peak  0.770,  deepest hole -0.862,  1-sigma level  0.268
Q1    1   0.8623  0.9218 -0.3523  11.00000  0.05    0.77
Q2    1   0.5915  0.6064 -0.2195  11.00000  0.05    0.77
Q3    1   0.8885  0.9484 -0.2796  11.00000  0.05    0.74
Q4    1   0.9392  0.8119 -0.3856  11.00000  0.05    0.73
Q5    1   0.3918  1.0350 -0.3525  11.00000  0.05    0.72
;
_shelx_res_checksum              64472
_shelx_hkl_file                  
;
   0   0  -3 22.4121 33.3399   4
   0   0  -3 42.5727 27.1307   2
   0   0  -4 113487. 3047.00   2
   0   0  -4 118862. 3145.75   4
   0   0  -5 16.6033 53.5208   4
   0   0  -5 126.413 71.3766   2
   0   0  -6 53148.9 1666.31   2
   0   0  -6 53990.5 1780.79   4
   0   0  -7 387.002 138.181   4
   0   0  -7 120.039 74.2372   2
   0   0  -8 70995.9 2356.78   4
   0   0  -8 68956.2 2187.52   2
   0   0  -9-73.5336 98.7676   4
   0   0  -9 176.308 114.949   2
   0   0 -10 20326.3 985.870   2
   0   0 -10 19891.4 1194.18   3
   0   0 -10 20629.8 1141.83   4
   0   0 -11 410.260 170.959   2
   0   0 -11 227.672 202.093   3
   0   0 -12 47392.8 2197.55   3
   0   0 -13 903.070 365.210   3
   0   0 -14 21946.7 1527.95   3
   0   0 -15-50.7116 356.276   3
   0   0 -16 4358.20 734.675   3
   0   0 -17 326.536 305.547   3
   0   0 -18 22320.6 1834.82   3
   0   0 -19-560.244 435.425   3
   0   0 -20 366.269 494.821   3
   0   1  -2 8468.54 385.125   1
   0  -1  -2 5856.28 313.370   1
   0   1   3 244217. 5957.52   3
   0   1  -3 256646. 5842.28   1
   0  -1  -3 253031. 5750.22   1
   0  -1  -3 253921. 5936.19   4
   0  -1   4 4723.61 264.212   1
   0   1  -4 5318.72 288.507   1
   0   1  -4 5001.68 329.120   4
   0  -1  -4 3595.32 300.206   4
   0  -1   4 5132.93 284.942   2
   0   1  -5 63962.2 1778.70   1
   0  -1   5 64504.0 1826.91   2
   0  -1   5 61627.8 1755.39   1
   0  -1  -5 64502.2 1989.06   4
   0   1  -5 62923.3 1947.34   4
   0  -1   6 13920.7 543.589   1
   0   1  -6 15598.7 748.508   4
   0  -1  -6 14930.8 757.790   4
   0   1  -6 14274.6 562.863   1
   0   1  -7 90661.5 2665.65   4
   0  -1  -7 87460.5 2679.05   4
   0  -1   7 79933.3 2258.76   1
   0  -1  -7 86199.1 2752.00   3
   0   1  -7 84156.4 2284.18   1
   0   1  -8 1200.65 241.024   4
   0   1  -8 1057.61 125.584   1
   0  -1  -8 1444.43 247.025   4
   0  -1  -8 1241.37 259.476   3
   0  -1  -8 1584.30 232.145   2
   0  -1   8 1029.57 118.953   1
   0  -1  -9 83.5857 109.847   2
   0  -1  -9 9.56183 143.123   3
   0  -1   9 32.2382 121.791   4
   0   1  -9 145.936 112.188   4
   0   1  -9 20.9109 29.4773   1
   0  -1   9 5.53549 34.1747   1
   0  -1  -9 78.9332 98.5970   4
   0  -1 -10 12015.0 923.633   3
   0  -1 -10 13099.0 803.398   2
   0  -1 -10 13148.2 889.147   4
   0   1 -10 13011.0 868.349   4
   0  -1  10 13403.7 922.404   4
   0  -1 -11 17101.4 978.067   2
   0  -1 -11 15984.0 1121.62   3
   0  -1  11 18573.8 1155.24   4
   0  -1 -12 354.400 169.483   2
   0  -1 -12 694.309 313.377   3
   0   1 -13 17031.0 1276.24   3
   0  -1 -13 15745.0 1236.76   3
   0  -1 -13 17363.9 1042.33   2
   0   1 -14 1603.45 473.913   3
   0  -1 -14 1903.62 344.924   2
   0  -1 -14 1981.91 488.851   3
   0  -1 -15 21854.6 1589.77   3
   0   1 -15 20795.9 1567.08   3
   0  -1 -16 3410.32 683.069   3
   0   1 -16 3460.61 658.541   3
   0  -1 -17 2893.13 670.453   3
   0   1 -17 2413.86 602.699   3
   0   1 -18 5168.30 908.379   3
   0  -1 -18 3949.40 774.588   3
   0  -1 -19 873.040 501.995   3
   0   1 -19 565.154 503.854   3
   0   1 -20 342.249 476.801   3
   0  -1 -20-141.461 378.485   3
   0   2   0 580.552 122.956   1
   0   2  -1 9454.71 471.622   1
   0   2   1 3673.96 279.886   1
   0   2   2 177465. 4029.54   3
   0  -2  -2 173525. 3981.74   1
   0   2  -2 171822. 4045.67   1
   0   2   3 46356.2 1544.81   3
   0   2   3 48777.6 1476.82   1
   0  -2  -3 46576.3 1447.97   1
   0  -2   3 47406.6 1452.20   4
   0   2  -3 47007.0 1519.31   1
   0   2  -4 12729.9 632.474   1
   0  -2  -4 13879.7 582.056   1
   0   2   4 14161.3 710.301   3
   0  -2   4 13030.1 623.930   4
   0   2   4 15084.0 622.564   1
   0  -2   4 12503.3 613.201   1
   0  -2   5 117552. 3338.21   1
   0  -2  -5 124896. 3476.28   4
   0   2  -5 123424. 3386.10   1
   0   2   5 123357. 3543.16   3
   0  -2  -5 123003. 3243.51   1
   0  -2   5 120317. 3413.59   4
   0  -2  -6 10364.5 627.461   4
   0  -2   6 8689.96 499.796   1
   0  -2   6 9276.00 583.663   4
   0   2  -6 8806.42 514.199   1
   0  -2  -6 9938.57 449.244   1
   0   2  -6 9196.98 565.161   4
   0  -2   6 9256.50 489.012   2
   0  -2  -7 65730.9 2184.71   4
   0  -2   7 63480.6 2140.97   4
   0   2  -7 63166.3 2105.87   4
   0  -2   7 62141.6 1941.43   1
   0  -2   7 62979.0 1936.81   2
   0  -2  -7 64317.7 1788.24   1
   0   2  -7 61588.6 1959.80   1
   0  -2  -8 201.116 138.402   3
   0  -2  -8 13.9015 83.6480   4
   0  -2   8 39.0078 61.4310   1
   0  -2   8 37.8603 128.298   4
   0  -2  -8 47.3544 34.7742   1
   0   2  -8-37.2436 94.0757   1
   0   2  -8 161.592 107.120   4
   0  -2   8 106.519 85.5614   2
   0   2  -9 45253.6 1768.91   4
   0  -2  -9 43331.4 1875.65   3
   0  -2   9 42523.7 1422.66   1
   0  -2  -9 47250.3 1849.12   4
   0   2  -9 43744.2 1479.37   1
   0  -2   9 47132.3 1840.75   4
   0  -2  10 5092.74 353.685   1
   0  -2 -10 5679.43 566.640   4
   0  -2  10 4975.88 553.414   4
   0  -2 -10 5423.62 611.293   3
   0   2 -10 5235.53 527.615   4
   0   2 -10 4927.43 363.230   1
   0  -2 -11 22270.0 1334.85   3
   0  -2  11 20401.5 809.248   1
   0  -2  11 24020.8 1317.53   4
   0  -2 -11 23089.0 1198.88   2
   0  -2 -12 2213.82 368.468   2
   0  -2 -12 2659.09 477.925   3
   0  -2  12 2068.29 400.134   4
   0  -2  13 44309.2 2121.75   4
   0  -2 -13 39038.3 2077.17   3
   0  -2 -13 39939.0 1824.25   2
   0  -2 -14 3395.95 613.775   3
   0  -2 -14 3773.39 495.929   2
   0  -2 -15 3658.38 653.520   3
   0   2 -15 4298.78 736.454   3
   0  -2 -16 838.235 434.042   3
   0   2 -16 345.622 347.977   3
   0  -2 -17 7300.87 972.930   3
   0   2 -17 8417.78 1144.40   3
   0   2 -18 136.812 457.906   3
   0  -2 -18 1196.38 503.750   3
   0   2 -19 4421.65 911.627   3
   0  -2 -19 3846.13 801.781   3
   0  -2 -20 823.416 549.497   3
   0   2 -20 271.680 388.145   3
   0   3   0-25.1709 80.0080   1
   0   3  -1 403.165 141.229   1
   0   3   1 393.407 126.100   1
   0   3  -2 41936.4 1522.64   1
   0   3   2 41725.0 1464.54   3
   0   3   2 42654.5 1485.27   1
   0  -3  -2 40709.0 1461.48   1
   0  -3  -3 91642.3 2709.32   1
   0   3   3 89753.1 2751.28   3
   0   3   3 93151.9 2733.12   1
   0   3  -3 92416.1 2796.43   1
   0   3  -4 156853. 4367.51   1
   0  -3  -4 154399. 4233.04   1
   0  -3   4 150255. 4174.10   4
   0  -3   4 155612. 4332.65   1
   0   3   4 159789. 4281.76   1
   0   3   4 154346. 4353.71   3
   0  -3  -5 6721.54 452.562   1
   0   3  -5 7560.80 547.080   1
   0  -3   5 7657.49 494.433   4
   0   3   5 6679.43 471.623   1
   0  -3   5 7299.82 512.658   1
   0   3   5 6838.76 540.156   3
   0  -3   6 30750.7 1244.80   4
   0   3  -6 29264.1 1241.40   1
   0   3   6 30180.7 1347.55   3
   0  -3  -6 30605.3 1134.79   1
   0  -3   6 29627.1 1220.32   1
   0  -3   7 517.576 185.728   4
   0  -3  -7 499.720 126.702   1
   0  -3   7 652.336 176.007   1
   0   3   7 433.822 164.268   3
   0   3  -7 207.759 107.714   1
   0  -3  -7 457.591 145.273   4
   0  -3   8 42675.9 1590.29   1
   0  -3   8 42526.0 1513.49   2
   0  -3  -8 43147.4 1858.58   3
   0  -3  -8 43557.2 1737.83   4
   0  -3   8 43364.5 1712.83   4
   0  -3  -8 44352.3 1433.56   1
   0   3  -8 41978.9 1603.79   1
   0  -3  -9 2845.26 470.222   3
   0  -3  -9 1983.77 217.542   1
   0  -3   9 2366.98 385.876   4
   0  -3   9 1805.74 265.104   2
   0  -3   9 1867.48 282.333   1
   0   3  -9 3061.82 362.799   1
   0  -3  -9 1607.83 329.594   4
   0  -3  10 22297.2 1229.62   4
   0  -3  10 22148.7 999.253   1
   0  -3  10 21097.5 973.634   2
   0  -3 -10 21666.0 1316.33   3
   0  -3 -10 21057.7 756.320   1
   0   3 -10 22397.5 1031.99   1
   0  -3  11 10012.3 611.910   1
   0  -3 -11 10911.1 932.449   3
   0  -3  11 11282.4 885.599   4
   0   3 -11 10623.4 662.733   1
   0  -3  12 36419.4 1359.61   1
   0  -3 -12 35916.5 1916.29   3
   0  -3  12 38006.0 1856.82   4
   0  -3  13 2685.88 273.078   1
   0  -3 -13 3055.03 454.357   2
   0  -3  13 2407.82 457.836   4
   0  -3 -13 2367.69 494.404   3
   0  -3  14 109.415 220.396   4
   0  -3 -14 173.608 333.746   3
   0  -3  15 924.676 341.554   4
   0  -3 -15 1178.38 474.426   3
   0  -3 -16 33275.7 2155.38   3
   0  -3 -17 449.510 389.669   3
   0   3 -17 45.2903 351.248   3
   0   3 -18 3303.99 769.538   3
   0  -3 -18 3825.92 772.306   3
   0   3 -19 2242.77 721.619   3
   0  -3 -19 1798.31 590.232   3
   0   3 -20 4426.37 945.145   3
   0   4   0 9401.95 665.513   1
   0   4  -1 4015.21 423.426   1
   0   4   1 3778.44 412.790   1
   0   4   2 113.173 98.8260   1
   0  -4  -2 139.019 72.7642   1
   0   4  -2 125.088 103.519   1
   0   4  -3 15849.1 916.173   1
   0   4   3 15770.8 864.321   3
   0  -4  -3 15789.2 864.660   1
   0   4   3 16977.7 898.420   1
   0  -4   4 8985.90 655.623   1
   0   4   4 8395.83 610.914   1
   0   4  -4 8716.75 665.416   1
   0  -4  -4 8798.11 604.476   1
   0   4   4 8409.88 624.923   3
   0   4  -5 8328.81 676.249   1
   0  -4   5 8580.97 646.728   1
   0  -4  -5 9891.10 634.426   1
   0   4   5 10083.5 710.801   3
   0  -4   5 8272.65 548.005   4
   0   4   5 9508.53 650.609   1
   0   4  -6 36242.6 1591.24   1
   0   4   6 38827.6 1543.66   1
   0  -4   6 37942.6 1471.14   4
   0  -4   6 37445.4 1571.36   1
   0  -4  -6 38544.0 1485.72   1
   0   4   6 40298.5 1678.33   3
   0  -4   7 16730.8 909.329   4
   0  -4   7 15806.0 918.380   1
   0   4   7 16075.1 1005.61   3
   0  -4  -7 16529.4 845.000   1
   0   4  -7 15119.1 940.299   1
   0  -4  -8 3062.87 332.807   1
   0  -4   8 3167.92 383.207   1
   0   4   8 2844.29 416.603   3
   0  -4  -8 2629.66 367.288   4
   0  -4   8 3373.74 414.283   4
   0   4  -8 3487.44 418.185   1
   0  -4  -8 2960.44 449.754   3
   0   4   9 5588.24 636.579   3
   0  -4  -9 5781.42 439.844   1
   0  -4  -9 5776.43 558.478   4
   0   4  -9 6141.75 563.077   1
   0  -4   9 6247.42 586.617   4
   0  -4   9 6122.48 552.599   1
   0  -4  -9 5435.12 628.535   3
   0   4 -10 502.987 178.653   1
   0  -4  10 264.784 169.959   4
   0  -4 -10 505.247 235.890   3
   0  -4  10 349.244 145.745   1
   0  -4 -10 736.137 144.735   1
   0  -4  10 588.899 151.597   2
   0   4 -11 192.311 120.534   1
   0  -4 -11-106.792 247.908   3
   0  -4  11 189.072 115.502   1
   0  -4  11 185.263 138.259   4
   0  -4 -11 95.9173 67.0067   1
   0  -4  11 182.604 122.177   2
   0   4 -12 6198.59 561.826   1
   0  -4  12 5956.59 532.649   1
   0  -4  12 6692.21 713.655   4
   0  -4 -12 6009.70 747.920   3
   0  -4 -12 5052.23 295.655   1
   0  -4  12 5961.67 497.673   2
   0  -4 -13 1789.29 461.760   3
   0  -4  13 2443.18 317.479   1
   0  -4  13 2679.59 484.046   4
   0  -4 -14 3768.00 670.923   3
   0  -4  14 2877.20 503.686   4
   0  -4  14 3316.08 356.981   1
   0  -4 -15 2106.89 537.952   3
   0  -4  15 1990.57 512.525   4
   0  -4  16 2997.68 601.105   4
   0  -4 -16 2281.10 568.115   3
   0  -4 -17 592.980 414.129   3
   0  -4 -18 1146.57 549.490   3
   0  -4 -19 6093.42 1031.09   3
   0   4 -19 5612.03 1003.60   3
   0   4 -20-156.281 561.879   3
   0   5   0-37.9549 114.220   1
   0   5  -1 105331. 3562.28   1
   0   5   1 118174. 3611.71   1
   0   5  -2 29003.1 1433.89   1
   0   5   2 29842.1 1414.74   1
   0  -5  -2 30531.2 1413.65   1
   0   5   3 67185.7 2393.32   1
   0   5   3 61916.7 2317.28   3
   0  -5  -3 65867.8 2351.92   1
   0   5  -3 63480.1 2433.92   1
   0  -5   4 1872.56 323.511   1
   0   5  -4 1849.10 336.062   1
   0   5   4 2696.77 383.717   1
   0   5   4 2624.98 375.656   3
   0  -5  -4 2813.02 374.659   1
   0  -5  -5 1267.76 253.261   1
   0   5   5 2040.18 346.009   1
   0  -5   5 1291.27 292.988   1
   0   5  -5 1283.51 296.932   1
   0   5   5 1334.88 288.985   3
   0  -5  -6 46016.0 1823.99   1
   0   5   6 46315.7 1876.48   1
   0   5   6 46634.4 1955.19   3
   0  -5   6 46251.6 1720.60   4
   0  -5   6 46985.2 1920.90   1
   0   5  -6 43510.9 1943.53   1
   0  -5  -7 69351.0 2323.08   1
   0  -5   7 71563.9 2295.67   4
   0   5  -7 67961.6 2474.03   1
   0   5   7 68607.5 2539.66   3
   0  -5  -8 4990.92 598.663   3
   0  -5   8 3927.08 453.614   4
   0  -5  -8 5034.51 485.590   1
   0   5   8 4436.64 554.765   3
   0   5  -8 4212.22 534.099   1
   0  -5  -9 1223.22 341.502   3
   0  -5  -9 1257.93 234.701   1
   0   5  -9 1478.70 327.452   1
   0  -5   9 1163.85 265.743   4
   0  -5  -9 1112.60 261.991   4
   0  -5 -10 26882.8 1572.40   3
   0   5 -10 25080.5 1372.47   1
   0  -5 -10 25170.6 1154.21   1
   0  -5  10 25092.9 1356.39   4
   0  -5 -11 22752.5 1493.87   3
   0   5 -11 22259.4 1282.31   1
   0  -5 -11 23153.8 1028.90   1
   0  -5  11 22951.6 1337.01   4
   0  -5  11 20626.0 1077.23   2
   0  -5  12 4432.80 580.932   4
   0   5 -12 3109.68 447.061   1
   0  -5 -12 3868.14 348.199   1
   0  -5  12 3329.70 401.317   2
   0  -5 -12 4149.04 647.634   3
   0  -5  13 699.407 234.695   4
   0   5 -13 1042.17 264.024   1
   0  -5  13 988.441 230.725   2
   0  -5 -13 485.317 289.798   3
   0  -5 -13 972.884 148.374   1
   0  -5  14 1045.04 376.220   4
   0  -5 -14 291.195 289.639   3
   0  -5  15 5203.42 738.650   4
   0  -5 -15 5405.70 840.057   3
   0  -5  16 1936.48 509.378   4
   0  -5 -16 930.256 427.577   3
   0  -5  17 3707.62 702.875   4
   0  -5 -17 2934.22 700.866   3
   0  -5 -18 724.707 511.196   3
   0   6   0 78318.0 2897.58   1
   0   6   1 9616.98 807.152   1
   0   6  -1 7683.07 732.990   1
   0   6  -2 4568.41 571.597   1
   0   6   2 5046.80 580.968   1
   0  -6  -2 4840.84 555.772   1
   0  -6  -3 50930.5 2125.56   1
   0   6   3 51277.9 2161.68   1
   0   6   3 50851.9 2101.81   3
   0   6  -3 52686.2 2247.96   1
   0   6   4 51408.3 2127.41   3
   0   6  -4 51278.8 2227.89   1
   0   6   4 52857.4 2186.99   1
   0  -6  -4 51907.9 2138.14   1
   0   6   5 15760.7 1056.50   1
   0  -6  -5 15478.1 1002.04   1
   0   6   5 16036.5 1057.74   3
   0   6  -5 13024.6 1017.86   1
   0   6   6 16904.5 1102.60   1
   0   6   6 15214.0 1065.26   3
   0   6  -6 16439.0 1143.55   1
   0  -6  -6 16244.7 1044.27   1
   0  -6   6 15802.7 899.994   4
   0   6   7 724.006 237.073   1
   0  -6   7 475.349 155.708   4
   0  -6  -7 555.553 200.950   1
   0   6   7 400.322 206.537   3
   0   6  -7 536.025 243.956   1
   0  -6   7 979.647 275.283   1
   0   6  -8 18109.9 1211.94   1
   0  -6  -8 18528.0 1085.93   1
   0  -6   8 17627.0 1035.70   4
   0  -6   8 16237.2 1114.02   1
   0   6  -9 30992.7 1684.56   1
   0  -6   9 30230.4 1604.39   1
   0  -6  -9 31847.5 1497.88   1
   0  -6   9 32392.8 1534.37   4
   0  -6 -10 25652.1 1618.16   3
   0  -6 -10 26998.4 1306.96   1
   0  -6  10 27073.9 1495.46   1
   0  -6  10 26555.4 1421.40   4
   0   6 -10 25769.8 1506.12   1
   0   6 -11 1322.98 361.386   1
   0  -6  11 939.661 281.948   1
   0  -6 -11 594.194 306.960   3
   0  -6  11 1024.26 289.625   4
   0  -6 -11 928.061 214.709   1
   0  -6 -12 7099.60 574.204   1
   0  -6  12 8654.72 832.745   4
   0  -6 -12 8894.76 959.585   3
   0  -6  12 7907.03 772.609   1
   0   6 -12 8929.74 838.803   1
   0  -6  12 7344.89 635.571   2
   0  -6 -13 11305.6 1130.73   3
   0  -6  13 8452.01 676.906   2
   0  -6  13 10642.6 970.417   4
   0  -6  13 10129.7 865.997   1
   0   6 -13 10305.9 903.360   1
   0  -6  14 11178.8 1023.02   4
   0  -6 -14 11831.4 1207.22   3
   0  -6 -15 551.079 372.504   3
   0  -6  15 1029.57 389.861   4
   0  -6  16 271.151 288.930   4
   0  -6 -16-257.055 470.672   3
   0  -6 -17-425.663 498.532   3
   0  -6  17 43.3932 278.087   4
   0  -6 -18 4982.63 970.511   3
   0   7   0 0.70520 166.111   1
   0  -7  -1 3014.24 470.675   1
   0   7   1 3355.00 539.875   1
   0   7  -1 3222.72 522.599   1
   0   7  -2 10515.9 926.425   1
   0  -7  -2 10563.3 902.620   1
   0   7   2 9474.89 878.480   1
   0   7   3 1899.76 363.848   3
   0   7   3 2212.28 418.036   1
   0   7  -3 2268.99 463.346   1
   0  -7  -3 2533.54 445.779   1
   0   7   4 563.974 250.928   1
   0  -7   4 835.691 283.190   1
   0   7  -4 578.599 266.420   1
   0  -7  -4 1073.87 290.732   1
   0   7   4 447.900 197.836   3
   0   7   5 377.856 233.278   3
   0   7   5 152.746 171.354   1
   0  -7  -5 222.772 189.569   1
   0  -7   5 274.261 182.250   1
   0   7  -5 58.1794 194.141   1
   0   7   6 40398.1 1986.06   1
   0  -7   6 43425.6 2061.18   1
   0  -7  -6 41996.7 1955.76   1
   0   7  -6 40987.1 2077.41   1
   0   7   7 11119.5 956.216   1
   0  -7  -7 10602.6 878.486   1
   0  -7   7 10482.6 762.191   4
   0   7  -7 11911.9 1040.70   1
   0  -7   7 10231.4 934.041   1
   0   7  -8 3945.94 598.803   1
   0  -7   8 2874.28 411.052   4
   0  -7   8 3714.08 558.023   1
   0  -7  -8 3267.90 467.038   1
   0  -7   9-124.079 175.447   4
   0  -7  -9-163.705 168.364   1
   0  -7   9-140.787 213.307   1
   0   7  -9 36.3754 213.339   1
   0  -7  10 11439.6 986.631   1
   0  -7  10 10997.6 876.155   4
   0  -7 -10 10594.7 841.518   1
   0   7 -10 11338.8 1008.17   1
   0  -7  11 2177.25 417.010   4
   0   7 -11 1561.03 368.866   1
   0  -7 -11 2415.71 389.813   1
   0  -7  11 1807.08 411.752   1
   0  -7  12 15315.9 1149.07   4
   0   7 -12 16371.6 1246.42   1
   0  -7  13 107.331 166.630   2
   0  -7  13 157.352 197.889   4
   0   7 -13-343.481 246.059   1
   0   7 -14 1325.37 381.526   1
   0  -7  14 815.653 218.964   2
   0  -7  14 1281.52 380.550   4
   0  -7  15-96.0197 256.055   4
   0  -7  16 1732.32 475.229   4
   0  -7  17 212.145 272.580   4
   0  -7  18 104.282 258.326   4
   0  -8   0 12518.1 1085.58   1
   0   8   0 11693.0 1062.61   1
   0   8  -1 12996.6 1120.94   1
   0   8   1 14213.4 1163.28   1
   0  -8  -1 13829.0 1131.11   1
   0  -8   1 14523.6 1172.94   1
   0  -8  -2 544.697 233.749   1
   0   8  -2 679.775 305.662   1
   0   8   2 293.454 206.324   1
   0  -8   2 195.737 165.698   1
   0   8   3 5562.44 693.193   3
   0   8  -3 7050.16 832.290   1
   0  -8   3 7627.14 838.355   1
   0  -8  -3 6632.43 757.481   1
   0   8   3 6710.23 784.562   1
   0   8  -4 47483.9 2432.43   1
   0   8   4 47777.2 2358.73   1
   0  -8  -4 55159.4 2435.14   1
   0  -8  -5 77431.5 3072.23   1
   0   8  -5 72475.4 3154.33   1
   0   8   5 74332.9 3100.54   1
   0   8   6 2740.71 522.144   1
   0  -8  -6 2143.23 428.405   1
   0   8  -6 1660.65 457.644   1
   0   8   7 1181.93 318.310   1
   0  -8   7 1760.49 319.380   4
   0  -8  -7 1339.02 345.479   1
   0   8  -7 1578.62 389.483   1
   0  -8  -8 1033.17 308.954   1
   0  -8   8 824.131 238.672   4
   0   8  -8 1099.05 385.239   1
   0  -8   9 11883.9 909.909   4
   0   8  -9 12228.6 1151.12   1
   0  -8  -9 12580.7 1019.32   1
   0   8 -10 13009.4 1206.50   1
   0  -8 -10 14688.1 1090.74   1
   0  -8  10 14320.5 1041.41   4
   0  -8  11 3313.94 515.503   4
   0   8 -11 2966.22 587.142   1
   0   8 -12 997.284 376.040   1
   0  -8  12 487.895 275.381   4
   0  -8  13 5653.66 716.956   4
   0  -8  13 4735.70 589.947   2
   0   8 -13 5288.62 768.899   1
   0  -8  14 7856.39 878.115   4
   0   8 -14 6939.56 861.822   1
   0  -8  15 3979.52 667.676   4
   0  -8  16-395.759 319.736   4
   0  -8  17 3612.67 702.733   4
   0   9   0 197.622 195.854   1
   0   9  -1 14783.5 1288.20   1
   0   9   1 13696.8 1245.70   1
   0   9  -2 20122.9 1538.86   1
   0   9   2 18356.4 1435.71   1
   0   9  -3 3021.84 572.473   1
   0   9   3 3633.03 649.509   1
   0   9  -4 1218.83 448.068   1
   0   9   4 1299.10 406.334   1
   0   9   5 2589.55 530.693   1
   0   9  -5 2262.02 536.913   1
   0   9   6 6742.64 842.599   1
   0   9  -6 6502.74 878.995   1
   0  -9   7 11606.1 858.082   4
   0   9  -7 12752.0 1237.42   1
   0   9   7 11484.8 1123.31   1
   0  -9   8 9377.40 783.618   4
   0   9  -8 9466.07 1082.64   1
   0   9  -9 1525.07 467.588   1
   0  -9   9 875.219 274.561   4
   0   9 -10 5728.82 839.791   1
   0  -9  10 6043.22 668.178   4
   0   9 -11 3615.27 659.574   1
   0  -9  11 3814.75 557.937   4
   0  -9  12 9606.84 935.482   4
   0   9 -12 9175.11 1052.52   1
   0  -9  13-93.3567 219.336   4
   0   9 -13-495.205 321.534   1
   0   9 -14 1427.27 430.220   1
   0  -9  14 819.987 350.241   4
   0  -9  15 633.249 305.976   4
   0  -9  16 4827.99 791.956   4
   0  -9  17 624.633 333.305   4
   0  10   0 17423.8 1511.43   1
   0  10  -1 3306.92 666.798   1
   0  10   1 3528.32 699.557   1
   0  10   2 137.047 223.974   1
   0  10  -2 203.970 250.479   1
   0  10  -3 1339.93 409.234   1
   0  10   3 1237.77 432.242   1
   0  10  -4 6707.65 951.882   1
   0  10   4 7947.02 994.784   1
   0  10   5 1009.14 425.342   1
   0  10  -5 1355.08 470.746   1
   0  10  -6 2229.35 606.720   1
   0  10   6 1755.24 430.504   1
   0  10  -7 1073.58 431.352   1
   0  10   7 1037.74 386.473   1
   0  10  -8 1594.81 526.125   1
   0 -10   8 1883.04 372.801   4
   0 -10   9 1783.51 384.160   4
   0  10  -9 1726.26 564.923   1
   0 -10  10 1609.70 380.229   4
   0  10 -10 1893.95 544.335   1
   0 -10  11-92.5917 188.853   4
   0  10 -11-288.395 311.951   1
   0  10 -12 3698.61 724.232   1
   0 -10  12 3803.97 598.366   4
   0 -10  13 945.567 330.202   4
   0  10 -13 831.598 385.011   1
   0 -10  14 2216.74 491.001   4
   0 -10  15 5578.62 803.885   4
   0 -10  16 900.619 387.831   4
   0  11   0-230.484 279.831   1
   0  11  -1 4920.65 820.207   1
   0  11   1 5624.99 886.173   1
   0  11   2 26851.7 1971.81   1
   0  11  -2 24423.0 1933.35   1
   0  11  -3 30633.5 2191.07   1
   0  11   3 31806.7 2175.73   1
   0  11  -4 2962.05 683.055   1
   0  11   4 3562.02 741.348   1
   0  11   5 866.438 415.495   1
   0  11  -5 543.809 311.260   1
   0  11  -6 28919.5 2123.83   1
   0  11   6 25343.3 1944.13   1
   0  11  -7 9803.01 1235.66   1
   0  11  -8 6540.43 1045.99   1
   0 -11   8 6035.23 661.964   4
   0  11  -9 402.742 332.625   1
   0 -11   9 493.939 245.191   4
   0  11 -10 3409.02 752.383   1
   0 -11  10 3828.71 561.533   4
   0  11 -11 7804.80 1086.32   1
   0 -11  11 8750.44 861.590   4
   0  11 -12 10399.7 1269.97   1
   0 -11  12 10106.9 963.758   4
   0  11 -13 776.543 407.385   1
   0 -11  13 1272.00 405.053   4
   0 -11  14 696.783 262.997   4
   0 -11  15 3600.96 629.619   4
   0  12   0 285.357 287.490   1
   0  12  -1 3981.30 840.774   1
   0  12   1 4147.45 854.581   1
   0  12  -2 49.1181 299.788   1
   0  12   2 266.074 321.186   1
   0  12  -3 4779.77 898.019   1
   0  12   3 4217.04 817.724   1
   0  12  -4 1387.69 519.592   1
   0  12   4 743.865 332.529   1
   0  12   5 14959.3 1550.05   1
   0  12  -5 13994.4 1542.56   1
   0  12  -6 3079.34 743.922   1
   0  12   6 1771.90 530.084   1
   0 -12   7 1555.27 348.990   4
   0  12  -7 1435.83 557.401   1
   0 -12   8 933.006 287.972   4
   0  12  -8 595.145 417.306   1
   0 -12   9 4584.71 609.565   4
   0  12  -9 4582.71 893.909   1
   0  12 -10-61.8762 396.113   1
   0 -12  10 512.613 293.758   4
   0  12 -11 1126.29 523.840   1
   0 -12  11 198.494 245.662   4
   0  12 -12-158.927 311.789   1
   0 -12  12 409.255 281.351   4
   0 -12  13 4696.75 702.066   4
   0  13   0 84.5600 379.700   1
   0  13   1 7908.38 1210.51   1
   0  13  -1 10365.7 1345.74   1
   0  13  -2 4845.45 897.087   1
   0  13   2 6083.41 1032.78   1
   0  13   3 11911.7 1452.43   1
   0  13  -3 11510.1 1429.17   1
   0  13   4 3131.26 825.444   1
   0  13  -4 2859.07 788.111   1
   0  13   5 2135.74 674.757   1
   0  13  -5 1727.42 613.961   1
   0  13  -6 606.814 457.213   1
   0 -13   7 9739.71 867.188   4
   0  13  -7 9245.63 1315.40   1
   0 -13   8 849.028 300.146   4
   0  13  -8 713.257 511.468   1
   0  13  -9 1628.40 650.125   1
   0 -13   9 577.151 267.173   4
   0  13 -10 1477.46 619.530   1
   0 -13  10 1517.85 374.577   4
   0  13 -11 4779.55 996.110   1
   0  13 -12 1552.18 640.025   1
   0  14   0 14045.2 1684.71   1
   0  14  -1 1978.31 616.860   1
   0  14   1 241.169 326.389   1
   0  14  -2 2890.76 745.298   1
   0  14   2 2514.39 815.897   1
   0  14  -3 384.440 504.315   1
   0  14   3-48.2131 315.374   1
   0  14   4 11737.3 1528.73   1
   0  14  -4 13664.4 1654.89   1
   0  14  -5 3008.93 804.295   1
   0  14  -6 5489.21 1046.95   1
   0  14  -7 406.146 348.564   1
   0  14  -8 11640.8 1574.52   1
   0  14  -9 609.512 498.490   1
   0  15   0 261.637 409.667   1
   0  15  -1 4615.58 1019.31   1
   0  15   1 5032.52 1072.09   1
   0  15   2-45.6070 385.522   1
   0  15  -2 353.697 429.517   1
   1   0 -20-1621.68 680.332   3
   1   0 -19 23567.4 1984.61   3
   1   0 -18 546.264 428.585   3
   1   0 -17-116.928 285.852   3
   1   0 -16-12.3735 301.215   3
   1   0 -15 8132.28 966.622   3
   1   0 -14-341.388 304.277   3
   1   0 -13 43469.0 2212.80   3
   1   0 -12 394.637 267.549   3
   1   0 -11 40342.0 1491.56   2
   1   0 -10 24.2014 37.2558   1
   1   0 -10 22.8550 88.6824   4
   1   0 -10 28.3606 77.2744   2
   1   0  -9 56843.1 1752.73   2
   1   0  -9 60164.2 2061.38   4
   1   0  -8 167.554 114.819   4
   1   0  -8 70.3229 51.0858   1
   1   0  -8 57.5662 62.1336   2
   1   0  -7 42285.4 1350.57   2
   1   0  -7 44102.1 1576.83   4
   1   0  -7 41613.1 1260.06   1
   1   0  -6 51.4891 35.3189   1
   1   0  -6 173.316 90.2938   4
   1   0  -6 55.2150 55.1115   2
   1   0  -5 251109. 6287.25   1
   1   0  -5 255111. 6521.55   4
   1   0  -4-20.4977 35.5608   1
   1   0  -4 58.5467 44.3365   4
   1   0  -3 1876.76 147.380   1
   1   0  -2 3.80532 30.8954   1
  -1   0  -2 98.2207 48.6480   4
  -1   0  -3 163064. 3665.39   3
  -1   0  -3 165319. 3708.50   4
  -1   0  -4 5.13288 62.3216   3
  -1   0  -4 39.5678 55.1517   4
  -1   0  -4-70.5291 69.4459   2
  -1   0  -5 84224.7 2480.32   4
  -1   0  -5 81079.4 2430.57   2
  -1   0  -5 83973.3 2471.31   3
  -1   0  -6 34.3165 65.1434   2
  -1   0  -6 41.7641 115.504   3
  -1   0  -6 18.0145 75.3649   4
  -1   0  -7 19028.5 968.515   3
  -1   0  -7 18382.5 894.421   2
  -1   0  -7 20606.1 985.074   4
  -1   0  -8 259.127 137.894   4
  -1   0  -8 238.368 126.729   2
  -1   0  -8 161.741 140.447   3
  -1   0  -9 164353. 4760.16   4
  -1   0  -9 158293. 4600.36   2
  -1   0  -9 160424. 4795.40   3
  -1   0 -10 43.6426 157.525   3
   1   0  10 178.199 220.947   4
  -1   0 -10 146.109 135.107   2
  -1   0 -10-104.817 150.773   4
   1   0  11 1333.84 336.621   4
  -1   0 -11 1097.14 299.477   3
  -1   0 -12 41.6089 177.990   3
  -1   0 -13 30456.9 1734.57   3
  -1   0 -14-104.707 223.034   3
  -1   0 -15 3186.05 610.519   3
  -1   0 -16 150.838 279.137   3
  -1   0 -17 3270.60 720.612   3
  -1   0 -18 118.212 360.932   3
  -1   0 -19 374.322 388.363   3
  -1   0 -20 683.642 539.638   3
   1  -1 -20 2849.48 754.929   3
   1   1 -20 2148.46 675.072   3
   1   1 -19 489.907 363.253   3
   1  -1 -19 150.478 378.360   3
   1   1 -18 507.646 443.586   3
   1  -1 -18 140.193 333.170   3
   1  -1 -17 1886.32 550.843   3
   1   1 -17 2069.62 589.419   3
   1   1 -16 827.602 412.786   3
   1  -1 -16 745.137 383.875   3
   1  -1 -15 234.965 300.607   3
   1  -1 -15-117.962 187.849   2
   1   1 -15 454.431 371.522   3
   1  -1 -14 6666.91 810.817   3
   1  -1 -14 6107.00 562.555   2
   1  -1 -13 8188.45 645.015   2
   1  -1 -13 6648.09 801.251   3
   1  -1 -12 27042.1 1213.98   2
   1  -1 -12 25496.2 1513.80   3
   1   1 -12 23338.6 783.649   1
   1   1 -11 1989.94 192.512   1
   1   1 -11 2330.33 378.588   4
   1  -1 -11 2433.68 321.044   2
   1  -1 -11 2192.87 415.108   3
   1   1 -10 161.906 74.3878   1
   1  -1 -10 82.9828 87.5088   2
   1  -1 -10 9.89593 109.917   4
   1  -1 -10-196.147 191.164   3
   1   1 -10 128.729 101.599   4
  -1  -1   9 404.111 93.2950   1
   1   1  -9 426.702 106.391   1
   1  -1  -9 428.123 208.159   3
   1   1  -9 485.288 172.977   4
   1  -1  -9 381.539 77.2992   1
   1  -1  -9 303.522 62.8960   1
   1  -1  -9 378.586 158.690   4
  -1  -1   8 96606.5 2955.32   4
   1   1  -8 93183.1 2872.76   4
   1  -1  -8 88514.2 2449.50   1
   1  -1  -8 95634.9 2950.79   4
   1   1  -8 94466.0 2602.44   1
  -1  -1   8 91527.4 2552.35   1
  -1  -1   7 1611.88 251.209   4
  -1  -1   7 1442.09 169.174   1
   1   1  -7 1603.92 230.563   4
   1  -1  -7 1301.52 138.260   1
   1   1  -7 1604.50 182.567   1
   1  -1  -7 1690.54 257.397   4
   1   1  -6 360.814 93.8951   1
   1   1  -6 291.391 94.0098   4
   1  -1  -6 203.378 114.343   4
  -1  -1   6 318.012 108.368   4
  -1  -1   6 252.850 71.8557   1
  -1  -1   5 10965.9 495.381   1
  -1  -1   5 10843.0 564.304   4
   1   1  -5 10684.1 507.039   1
   1   1  -5 10927.3 548.256   4
   1   1  -4 8052.60 411.208   4
  -1  -1   4 7578.08 385.815   1
   1   1  -4 7624.28 400.307   1
  -1  -1   4 8050.73 420.128   4
   1   1  -3 17736.5 665.631   1
   1   1  -3 17611.7 622.038   4
   1   1  -2-0.12894 256.048   1
  -1   1   2-0.12927 267.181   3
  -1  -1  -1-0.06437 64.5699   4
  -1  -1  -2 20188.2 608.180   1
  -1  -1  -2 20213.1 648.836   4
   1   1   3 53300.6 1623.25   3
  -1  -1  -3 51980.8 1577.75   4
  -1  -1  -3 52177.9 1434.63   1
   1  -1   3 51842.3 1541.98   1
   1   1   3 57771.9 1466.21   1
   1  -1   4 19447.6 696.145   1
   1  -1   4 19676.5 799.898   2
  -1  -1  -4 19995.1 803.575   4
   1   1   4 19850.5 829.097   3
  -1  -1  -4 20661.3 846.158   3
   1  -1   5 76267.6 2226.22   2
  -1  -1  -5 73870.0 2283.82   3
  -1   1  -5 75820.8 2259.59   4
   1  -1   5 72504.1 2017.16   1
  -1  -1  -5 71418.2 2230.01   4
  -1   1  -6 52576.3 1775.00   4
  -1  -1  -6 51110.3 1765.11   2
   1  -1   6 53520.2 1729.08   2
   1  -1   6 50233.5 1469.23   1
  -1  -1  -6 51176.6 1813.77   3
  -1  -1  -6 53340.3 1784.06   4
  -1  -1  -7 2268.44 317.666   3
   1  -1   7 2413.63 287.322   2
  -1  -1  -7 2258.36 297.565   4
   1  -1   7 1988.08 163.207   1
  -1  -1  -7 1618.62 240.968   2
  -1   1  -7 2314.87 302.247   4
  -1   1  -8 29.1456 72.9787   4
  -1  -1  -8 75.3985 111.776   3
  -1  -1  -8 50.3773 105.084   4
   1  -1   8 45.8990 30.3062   1
  -1  -1  -8 303.004 144.548   2
  -1   1  -9 8593.69 672.172   4
  -1  -1  -9 9962.21 725.347   4
  -1  -1  -9 9453.56 687.080   2
  -1  -1  -9 8608.06 714.217   3
  -1  -1 -10 33738.6 1571.05   4
  -1  -1 -10 31099.8 1579.72   3
   1  -1  10 33281.9 1595.79   4
  -1   1 -10 33867.3 1544.97   4
  -1  -1 -10 34025.4 1510.48   2
  -1   1 -11 178.832 209.854   3
   1  -1  11 284.808 230.395   4
  -1  -1 -11 121.199 123.413   2
  -1  -1 -11 442.384 241.558   3
  -1  -1 -12 631.178 227.998   2
  -1   1 -12 1089.39 342.450   3
   1  -1  12 177.047 172.084   4
  -1  -1 -12 929.945 317.876   3
  -1  -1 -13 1114.68 363.413   3
   1  -1  13 1060.05 323.280   4
  -1  -1 -13 937.622 256.552   2
  -1   1 -13 897.896 349.278   3
  -1  -1 -14 1082.95 294.479   2
  -1   1 -14 841.276 353.861   3
  -1  -1 -14 835.192 339.437   3
  -1  -1 -15 3357.11 633.960   3
  -1   1 -15 3244.62 656.890   3
  -1   1 -16 1816.34 568.184   3
  -1  -1 -16 2355.17 507.271   3
  -1  -1 -17 2141.58 638.237   3
  -1   1 -17 2070.74 578.259   3
  -1  -1 -18 1842.73 560.715   3
  -1   1 -18 1583.04 530.989   3
  -1  -1 -19-126.361 333.218   3
  -1   1 -19-231.524 352.569   3
  -1  -1 -20 2679.78 683.475   3
  -1   1 -20 1830.24 614.568   3
   1  -2 -20-1029.22 593.997   3
   1   2 -20-154.038 495.291   3
   1   2 -19 296.832 360.387   3
   1  -2 -19 862.729 472.284   3
   1   2 -18 3425.90 784.634   3
   1  -2 -18 4899.14 837.634   3
   1  -2 -17-385.681 368.673   3
   1   2 -17-297.742 330.648   3
   1  -2 -16 2174.00 561.354   3
   1  -2 -15 186.311 155.745   2
   1  -2 -15 455.188 338.062   3
   1  -2 -14 2852.69 404.507   2
   1  -2 -14 2810.79 547.935   3
   1  -2 -13 2673.82 404.979   2
   1  -2 -13 2351.71 494.770   3
   1   2 -13 2215.83 232.052   1
   1  -2 -12 8129.95 660.329   2
   1  -2 -12 8539.51 846.282   3
   1   2 -12 7914.78 491.648   1
   1  -2 -11 2396.07 430.409   3
  -1  -2  11 2222.52 391.704   4
   1   2 -11 2042.95 250.551   1
  -1  -2  11 2358.82 250.949   1
   1   2 -11 2131.19 350.871   4
   1  -2 -10 28809.0 1401.88   4
   1   2 -10 28880.0 1344.23   4
  -1  -2  10 28086.7 1076.66   1
   1   2 -10 27607.8 1100.65   1
   1  -2 -10 27968.9 1491.23   3
   1  -2 -10 25559.3 899.731   1
  -1  -2  10 30354.4 1424.90   4
   1  -2 -10 27773.1 898.112   1
   1  -2  -9 116.741 150.163   3
   1  -2  -9 66.1850 85.0235   4
   1  -2  -9 69.8478 53.2924   1
  -1  -2   9 50.9937 66.8238   1
  -1  -2   9 49.2056 107.557   4
   1   2  -9 122.513 132.053   4
   1   2  -9 133.551 85.7686   1
   1  -2  -9 158.250 65.8565   1
   1   2  -8 29865.2 1174.20   1
  -1  -2   8 27828.6 1103.20   1
   1  -2  -8 30672.8 1344.13   4
   1   2  -8 29599.9 1249.89   4
  -1  -2   8 30206.4 1294.46   4
   1  -2  -8 29750.9 1048.84   1
   1   2  -7 105.492 98.6976   4
   1   2  -7 99.4382 77.3072   1
  -1  -2   7 79.4672 65.7605   2
   1  -2  -7 144.219 102.283   4
  -1  -2   7 53.1584 74.8073   1
  -1  -2   7 3.14868 107.328   4
   1  -2  -7 164.480 76.1010   1
  -1  -2   6 93323.2 2802.17   1
  -1  -2   6 98974.8 2869.94   4
   1   2  -6 99005.9 2871.51   1
   1  -2  -6 101700. 2782.96   1
  -1  -2   6 99310.6 2597.65   2
   1   2  -6 95110.4 2830.75   4
   1   2  -5 213.443 85.5757   4
  -1  -2   5 272.562 95.7755   1
   1  -2  -5 141.499 77.6871   1
   1   2  -5-10.4042 74.1499   1
  -1  -2   5 134.792 85.4824   4
  -1  -2   4 140127. 3718.62   4
   1   2  -4 141905. 3862.82   1
   1  -2  -4 147790. 3833.05   1
  -1  -2   4 134903. 3831.84   1
  -1   2   4 144333. 3915.44   3
   1   2  -4 138020. 3704.61   4
  -1  -2   3 53.0424 38.6203   4
   1  -2  -3 116.486 71.6104   1
  -1   2   3 86.6081 76.4427   3
   1   2  -3 89.0725 72.4203   1
  -1   2   2 650.160 115.977   3
  -1  -2   2 647.772 80.2692   4
   1   2  -2 648.311 129.795   1
  -1   2   1 688.191 116.682   3
   1   2  -1 721.109 133.080   1
   1   2   0 29487.5 1045.97   1
  -1   2   0 29270.6 1082.75   1
  -1   2  -1 31673.6 1160.43   1
   1   2   1 17959.7 973.513   1
  -1   2  -2 1952.71 225.214   1
  -1  -2  -2 1879.68 190.522   1
   1   2   2 2101.69 210.056   1
   1   2   2 1684.64 199.378   3
  -1  -2  -3 2105.05 195.516   1
   1  -2   3 2104.27 234.554   1
  -1  -2  -3 2108.37 208.600   4
   1   2   3 2128.73 203.267   1
  -1   2  -3 2342.86 247.937   1
   1   2   3 1771.86 222.778   3
   1   2   4 80696.8 2229.10   1
  -1  -2  -4 80358.0 2215.78   1
   1  -2   4 77531.7 2325.97   1
  -1  -2  -4 80579.8 2338.27   4
   1   2   4 79608.2 2419.64   3
  -1   2  -4 77045.2 2341.99   1
   1  -2   5 645.940 132.323   1
   1   2   5 1006.74 191.511   3
  -1  -2  -5 1108.76 184.920   4
  -1  -2  -5 1132.83 131.489   1
   1   2   5 1004.83 132.427   1
  -1  -2  -5 1013.73 205.950   3
  -1   2  -5 620.980 136.464   1
   1   2   6 89.0927 90.3046   3
  -1   2  -6 44.3925 71.5527   1
  -1  -2  -6 35.1067 75.6765   4
  -1  -2  -6 96.8004 103.884   3
  -1  -2  -6 65.2847 49.2864   1
   1  -2   6 125.615 71.5358   1
   1   2   6 159.846 58.5979   1
   1  -2   6 82.0809 79.8023   2
   1  -2   7 2378.54 242.726   1
   1  -2   7 2556.91 309.686   2
  -1  -2  -7 2281.61 323.890   3
  -1  -2  -7 2140.55 151.386   1
  -1  -2  -7 2665.88 326.601   4
   1  -2   8 80505.6 2702.57   4
  -1  -2  -8 79504.6 2758.64   3
   1  -2   8 78881.9 2327.87   1
   1  -2   8 79191.5 2527.26   2
  -1  -2  -8 83241.1 2698.27   4
   1  -2   9 3132.31 276.044   1
  -1  -2  -9 3935.04 453.269   2
   1  -2   9 3130.24 366.809   2
  -1  -2  -9 3742.88 498.298   3
   1  -2   9 3044.47 414.141   4
  -1  -2  -9 4320.52 472.936   4
  -1  -2 -10 2896.85 426.951   3
  -1  -2 -10 3037.60 426.131   2
   1  -2  10 3071.94 434.093   4
  -1  -2 -10 2968.61 410.839   4
   1  -2  10 2709.51 239.355   1
   1  -2  11 80.4831 53.1320   1
   1  -2  11 66.0605 179.368   4
  -1  -2 -11 49.4772 209.867   3
  -1  -2 -11-148.695 158.442   2
  -1  -2 -12 48663.1 2088.49   2
  -1  -2 -12 45217.2 2189.35   3
   1  -2  12 50063.4 2226.80   4
   1  -2  13 1574.71 391.994   4
  -1  -2 -13 1319.23 306.205   2
  -1  -2 -13 1250.93 366.839   3
  -1  -2 -14 11237.6 1078.43   3
   1  -2  14 10238.6 1015.84   4
  -1   2 -14 9997.80 1039.67   3
   1  -2  15 670.338 311.790   4
  -1   2 -15 716.423 382.878   3
  -1  -2 -15 1023.36 446.221   3
  -1   2 -16 5445.42 841.441   3
  -1  -2 -16 5852.89 851.260   3
  -1  -2 -17 577.393 400.885   3
  -1   2 -17-323.229 420.782   3
  -1  -2 -18 2676.11 586.789   3
  -1   2 -18 2118.44 651.111   3
  -1  -2 -19 578.875 444.631   3
  -1   2 -19 856.699 473.870   3
  -1   2 -20-477.842 464.168   3
   1   3 -20-109.574 445.287   3
   1   3 -19 1246.13 628.849   3
   1  -3 -19 42.2895 367.059   3
   1   3 -18 226.640 483.560   3
   1  -3 -18 17.9115 368.361   3
   1  -3 -17 12152.2 1299.91   3
   1  -3 -16 502.073 298.497   3
   1  -3 -15-292.013 353.795   3
   1   3 -14 5865.18 462.897   1
   1  -3 -14 5165.03 590.736   2
   1  -3 -14 4168.76 675.215   3
  -1  -3  14 5976.96 435.878   1
  -1  -3  13 26762.5 1125.12   1
   1  -3 -13 25179.1 1625.19   3
  -1  -3  13 28612.5 1616.45   4
   1   3 -13 26156.3 1163.77   1
  -1  -3  12 10120.0 624.533   1
   1   3 -12 9695.62 636.573   1
   1  -3 -12 9758.28 935.048   3
   1  -3 -12 7762.42 365.886   1
  -1  -3  12 10755.5 885.958   4
   1   3 -11 34212.1 1433.35   1
  -1  -3  11 36136.0 1421.81   1
  -1  -3  11 38113.8 1732.12   4
   1  -3 -11 37395.9 1843.10   3
   1  -3 -11 35383.1 1155.37   1
   1  -3 -11 35196.8 1197.95   1
   1  -3 -10 195.030 192.976   3
  -1  -3  10 79.4049 153.643   4
   1   3 -10 140.829 107.562   1
   1  -3 -10 277.917 143.410   4
   1   3 -10 197.114 132.247   4
   1  -3 -10 57.8383 58.1773   1
  -1  -3  10 143.377 108.469   1
   1   3  -9 12932.8 775.215   1
  -1  -3   9 13164.4 607.503   2
   1  -3  -9 12184.7 642.610   1
  -1  -3   9 13312.8 845.757   4
   1  -3  -9 13277.2 872.211   4
   1   3  -9 12754.2 805.171   4
  -1  -3   9 12910.2 752.240   1
   1  -3  -8 17899.8 806.108   1
   1   3  -8 16679.4 892.298   4
  -1  -3   8 17454.6 927.932   4
  -1  -3   8 16205.1 868.992   1
  -1  -3   8 16443.7 695.207   2
   1   3  -8 16418.5 898.288   1
  -1  -3   7 49623.8 1747.25   4
  -1  -3   7 48003.3 1752.06   1
   1   3  -7 49046.4 1797.70   1
   1  -3  -7 48253.0 1653.77   1
   1  -3  -6 5375.71 417.475   1
  -1  -3   6 4899.83 397.709   4
  -1   3   6 5071.20 480.804   3
  -1  -3   6 5101.59 441.959   1
   1   3  -6 4740.19 447.720   1
   1   3  -5 957.191 206.841   1
   1  -3  -5 850.114 180.440   1
  -1  -3   5 651.787 155.518   1
  -1  -3   5 737.587 146.822   4
  -1   3   5 859.676 201.720   3
  -1  -3   4 4735.58 332.442   4
  -1  -3   4 5087.29 428.318   1
   1   3  -4 5143.29 448.195   1
   1  -3  -4 4988.03 406.715   1
  -1   3   4 4315.60 396.695   3
  -1   3   3 370026. 9396.94   3
  -1  -3   3 367724. 9128.59   4
   1   3  -3 362433. 9507.82   1
   1  -3  -3 370553. 9435.09   1
   1   3  -2 79493.7 2539.99   1
  -1   3   2 80729.6 2422.59   3
  -1   3   2 83433.1 2558.95   1
   1   3  -1 103486. 3109.70   1
  -1   3   1 107769. 3149.77   1
  -1   3   0 743.182 179.821   1
   1   3   0 540.849 147.818   1
   1   3   1 98911.3 2925.72   1
  -1   3  -1 98987.4 2981.76   1
  -1  -3  -2 264.675 88.9796   1
   1   3   2 279.165 122.457   1
  -1   3  -2 147.446 93.4122   1
   1   3   3 17389.7 815.740   1
   1   3   3 18632.9 886.225   3
  -1  -3  -3 18267.8 817.030   1
  -1   3  -3 16977.7 883.576   1
   1   3   4 4076.50 343.089   1
   1  -3   4 3669.13 361.715   1
   1   3   4 3878.98 383.030   3
  -1   3  -4 3451.40 362.550   1
  -1  -3  -4 4349.81 349.193   1
  -1   3  -5 130252. 3904.17   1
   1   3   5 139978. 3776.27   1
   1   3   5 136441. 3996.46   3
   1  -3   5 131750. 3879.55   1
  -1  -3  -5 140146. 3759.08   1
  -1  -3  -5 140866. 3867.75   4
   1  -3   5 133822. 3871.63   4
  -1   3  -6 11616.3 705.174   1
  -1  -3  -6 12245.0 603.578   1
   1   3   6 13077.7 643.870   1
   1  -3   6 11534.1 689.603   1
   1   3   6 11598.3 765.556   3
   1  -3   6 11217.3 710.539   4
  -1  -3  -6 12250.4 714.909   4
  -1  -3  -6 12328.4 805.205   3
  -1   3  -7 71545.3 2372.00   1
   1  -3   7 72601.1 2345.05   1
  -1  -3  -7 72476.7 2144.29   1
  -1  -3  -7 73273.6 2442.78   4
  -1  -3  -7 74195.2 2602.79   3
   1  -3   7 74733.8 2492.60   4
   1   3   7 74806.4 2202.64   1
   1   3   7 71424.3 2561.67   3
  -1  -3  -8 2425.57 348.268   4
   1  -3   8 1862.63 283.192   2
   1  -3   8 1979.33 266.384   1
   1  -3   8 2324.85 345.682   4
  -1   3  -8 2157.68 295.204   1
   1   3   8 2681.23 396.622   3
  -1  -3  -8 2049.51 348.713   3
  -1  -3  -8 2368.91 217.480   1
   1  -3   9 28903.0 1194.01   1
  -1  -3  -9 27324.6 917.751   1
   1  -3   9 27941.5 1250.32   2
  -1  -3  -9 30638.4 1412.87   4
   1  -3   9 29512.2 1420.48   4
  -1  -3  -9 30121.6 1523.86   3
   1  -3  10 5927.74 460.982   1
   1  -3  10 6245.90 633.628   4
  -1  -3 -10 6356.69 675.862   3
   1  -3  10 5473.54 502.649   2
  -1  -3 -11 80457.2 2848.53   2
   1  -3  11 71725.1 2513.75   2
  -1  -3 -11 76088.5 2975.81   3
   1  -3  11 72831.9 2310.61   1
   1  -3  11 74918.5 2854.98   4
  -1  -3 -12 155.412 132.659   2
   1  -3  12 27.6963 68.9450   1
  -1  -3 -12 129.042 205.729   3
   1  -3  12 71.2320 213.883   4
   1  -3  13 1508.88 183.427   1
   1  -3  13 1581.66 398.811   4
  -1  -3 -13 1882.14 442.808   3
  -1  -3 -14 6982.70 875.323   3
   1  -3  14 7281.12 859.701   4
   1  -3  15 24777.1 1688.86   4
  -1  -3 -15 22530.5 1659.81   3
   1  -3  16 675.236 279.308   4
  -1   3 -16 1306.89 486.339   3
  -1  -3 -16 1037.02 407.326   3
  -1  -3 -17 243.841 313.339   3
  -1   3 -17 1385.43 492.514   3
  -1   3 -18-1148.40 518.993   3
  -1  -3 -18 213.911 346.541   3
  -1  -3 -19 2236.84 681.721   3
  -1   3 -19 2346.44 766.046   3
  -1   3 -20 1476.84 630.183   3
   1   4 -20 2775.46 857.605   3
   1  -4 -19 689.157 538.012   3
   1  -4 -18-173.205 374.796   3
   1  -4 -17-28.3988 317.716   3
   1  -4 -16 631.966 370.600   3
   1   4 -15 4206.22 450.622   1
   1  -4 -15 3212.41 626.817   3
  -1  -4  14 2031.85 301.657   1
   1   4 -14 2199.66 339.734   1
   1  -4 -14 1895.83 480.227   3
  -1  -4  14 2257.05 491.262   4
   1  -4 -13 274.759 77.4077   1
  -1  -4  13 385.335 156.592   1
   1  -4 -13-236.039 284.683   3
  -1  -4  13 384.031 231.687   4
   1  -4 -13 146.086 58.8814   1
   1   4 -13 337.802 166.246   1
  -1  -4  12 12603.7 970.879   4
   1   4 -12 10450.5 762.325   1
  -1  -4  12 11695.1 781.392   1
   1  -4 -12 11496.1 1047.79   3
   1  -4 -12 10911.9 590.324   1
  -1  -4  11 2786.67 281.541   2
   1  -4 -11 3440.23 530.669   3
  -1  -4  11 2834.80 442.550   4
  -1  -4  11 2903.46 386.324   1
   1  -4 -11 3422.46 331.109   1
   1   4 -11 2779.81 381.035   1
   1   4 -10 11314.7 803.824   1
   1  -4 -10 11376.2 940.625   3
   1  -4 -10 11450.3 672.335   1
  -1  -4  10 11750.0 617.623   2
  -1  -4  10 12178.4 856.107   4
  -1  -4  10 11642.1 793.376   1
  -1  -4   9 1447.19 277.845   1
  -1  -4   9 1552.85 287.386   4
   1  -4  -9 1254.71 222.210   1
   1  -4  -9 1203.86 267.279   4
   1  -4  -9 1411.30 333.423   3
   1   4  -9 1423.31 274.746   1
  -1  -4   8 610.634 172.401   1
   1  -4  -8 408.566 144.995   1
  -1   4   8 324.371 154.425   3
  -1  -4   8 500.269 183.264   4
   1   4  -8 463.950 187.862   1
   1  -4  -7 3687.39 393.119   1
  -1   4   7 3663.15 468.220   3
   1   4  -7 4315.97 487.528   1
  -1  -4   7 5078.04 442.505   4
  -1  -4   7 3620.93 417.605   1
  -1  -4   6 45695.2 1598.21   4
  -1  -4   6 40969.7 1728.74   1
   1  -4  -6 47468.2 1726.32   1
  -1   4   6 45839.6 1833.23   3
   1   4  -6 44064.9 1805.66   1
  -1   4   5 5358.36 507.722   3
  -1  -4   5 5170.61 495.799   1
   1   4  -5 5626.06 544.865   1
   1  -4  -5 5557.80 481.154   1
  -1  -4   5 5261.12 397.736   4
   1   4  -4 38710.8 1627.38   1
   1  -4  -4 40181.7 1576.83   1
  -1   4   4 40693.3 1577.50   3
  -1  -4   4 38073.2 1317.20   4
   1  -4  -3 23315.8 1108.34   1
   1   4  -3 20895.7 1107.76   1
  -1   4   3 22425.3 1130.49   1
  -1   4   3 23254.6 1068.81   3
   1   4  -2 2715.95 353.772   1
  -1   4   2 2469.18 340.580   1
  -1   4   2 2771.71 325.291   3
  -1   4   1 169176. 4826.02   1
   1   4  -1 165787. 4797.95   1
  -1   4   0 2719.77 375.165   1
   1   4   0 2321.91 323.541   1
  -1   4  -1 10841.6 747.533   1
   1   4   1 12006.6 745.851   1
  -1   4  -2 43077.3 1719.25   1
  -1  -4  -2 41134.7 1616.53   1
   1   4   2 44037.2 1655.59   1
  -1  -4  -3 12544.1 739.636   1
   1   4   3 11568.4 745.238   3
   1   4   3 12677.3 748.550   1
  -1   4  -3 12559.2 806.091   1
  -1   4  -4 10628.5 737.312   1
   1   4   4 10337.6 709.020   3
   1  -4   4 10146.6 718.496   1
   1   4   4 10002.5 658.228   1
  -1  -4  -4 9875.83 646.922   1
  -1   4  -5 6509.20 573.452   1
   1   4   5 6568.40 581.015   3
   1   4   5 7532.29 551.385   1
   1  -4   5 6092.18 547.144   1
  -1  -4  -5 6882.47 520.998   1
   1  -4   6 21204.3 1043.77   4
  -1  -4  -6 21010.6 1028.81   4
   1   4   6 20169.7 1118.92   3
  -1  -4  -6 21526.2 990.645   1
   1   4   6 21613.5 1020.22   1
   1  -4   6 20350.3 1079.48   1
  -1   4  -6 21169.6 1118.31   1
   1  -4   7 6725.12 583.647   1
   1  -4   7 7558.37 606.946   4
   1   4   7 6845.76 641.778   3
  -1  -4  -7 7205.99 503.977   1
   1   4   7 7146.90 532.225   1
  -1   4  -7 7739.90 629.781   1
  -1  -4  -7 7156.61 659.178   3
  -1  -4  -7 7525.03 584.942   4
  -1  -4  -8 6736.92 674.284   3
  -1   4  -8 6585.76 584.322   1
  -1  -4  -8 5993.62 553.219   4
   1  -4   8 6628.12 585.676   4
  -1  -4  -8 6163.35 448.606   1
   1   4   8 5498.86 606.636   3
   1  -4   8 5805.05 531.994   1
  -1   4  -9 2873.16 384.760   1
   1   4   9 2947.45 459.553   3
  -1  -4  -9 3241.22 499.254   3
  -1  -4  -9 3260.71 428.681   4
   1  -4   9 2834.46 368.621   2
  -1  -4  -9 3029.58 292.505   1
   1  -4   9 2837.73 368.641   1
   1  -4   9 3620.23 482.133   4
   1  -4  10-32.1749 141.843   1
  -1  -4 -10-153.097 86.0600   1
   1  -4  10-37.5052 118.598   2
  -1  -4 -10 154.192 248.353   3
   1  -4  10 169.603 163.678   4
   1  -4  11 15050.7 916.429   2
  -1  -4 -11 16005.4 1177.95   3
   1  -4  11 15993.0 915.209   1
   1  -4  11 17198.9 1140.36   4
  -1  -4 -11 14574.2 594.658   1
   1  -4  12 4321.34 436.262   1
  -1  -4 -12 4333.27 660.768   3
   1  -4  12 3814.22 437.758   2
   1  -4  12 5182.84 642.959   4
  -1  -4 -13 1693.16 418.603   3
   1  -4  13 1538.32 245.811   1
   1  -4  13 1896.74 456.569   4
  -1  -4 -14-328.141 327.295   3
   1  -4  14 39.8611 222.066   4
  -1  -4 -15 2876.08 607.790   3
   1  -4  15 4826.21 721.237   4
  -1  -4 -16 601.672 369.380   3
   1  -4  16 42.4736 247.305   4
  -1  -4 -17 2841.19 755.316   3
   1  -4  17 3220.82 662.898   4
  -1   4 -18-580.124 470.738   3
  -1  -4 -18-181.764 383.343   3
  -1  -4 -19 2097.53 694.877   3
  -1   4 -19 1153.27 621.886   3
   1  -5 -18 2417.73 657.341   3
   1  -5 -17 2817.81 699.654   3
   1  -5 -16 13104.2 1318.70   3
  -1  -5  15 5557.15 755.172   4
   1  -5 -15 4704.65 764.497   3
   1   5 -15 5870.78 602.676   1
  -1  -5  14 160.095 210.607   4
   1   5 -14 178.986 166.166   1
   1  -5 -14-109.163 252.421   3
   1  -5 -14 214.102 73.7204   1
  -1  -5  13 3461.83 524.016   4
   1  -5 -13 2936.20 315.920   1
   1   5 -13 2889.93 431.563   1
   1  -5 -13 3823.99 657.033   3
   1   5 -12 36693.2 1710.13   1
  -1  -5  12 36758.6 1781.21   4
   1  -5 -12 35141.5 1962.52   3
   1  -5 -12 35974.5 1416.27   1
  -1  -5  12 31349.4 1287.62   2
   1  -5 -11 2594.09 512.079   3
  -1  -5  11 2688.47 419.273   4
   1   5 -11 2187.49 367.384   1
   1  -5 -11 2566.99 336.078   1
  -1  -5  11 2562.08 299.772   2
   1   5 -10 434.741 212.851   1
  -1  -5  10 454.875 163.950   4
   1  -5 -10 421.021 168.442   1
   1  -5 -10 42.7919 191.802   3
  -1  -5   9 134.364 112.738   4
   1  -5  -9-79.5065 174.462   3
   1   5  -9 179.603 172.255   1
   1  -5  -9-25.8617 139.957   1
   1  -5  -8 66441.4 2380.32   1
  -1  -5   8 65542.9 2320.08   4
  -1   5   8 69784.9 2648.48   3
   1   5  -8 65944.7 2561.70   1
   1   5  -7 21861.3 1259.62   1
   1  -5  -7 23710.9 1190.01   1
  -1   5   7 23066.8 1291.96   3
  -1  -5   7 21938.8 1061.06   4
  -1   5   6 23471.8 1242.90   3
   1  -5  -6 23012.2 1160.32   1
  -1  -5   6 23118.4 1002.64   4
   1   5  -6 21783.7 1252.84   1
  -1  -5   5 8175.32 519.098   4
   1  -5  -5 6388.70 586.535   1
   1   5  -5 8109.85 728.445   1
  -1  -5   5 8310.76 687.689   1
  -1   5   5 6339.40 606.188   3
   1  -5  -4 144238. 4471.79   1
  -1   5   4 148542. 4467.43   3
  -1   5   4 151316. 4579.79   1
   1   5  -4 156049. 4629.75   1
   1   5  -3 217.900 115.509   1
   1  -5  -3 361.553 172.694   1
  -1   5   3 218.949 104.234   3
  -1   5   3 284.201 167.438   1
   1   5  -2 32078.2 1508.61   1
  -1   5   2 32541.8 1406.10   3
  -1   5   2 31803.5 1502.99   1
   1  -5  -2 29829.6 1446.28   1
  -1   5   1 1082.89 264.465   1
   1   5  -1 1053.58 244.567   1
  -1   5   0 113183. 3684.61   1
   1   5   0 113460. 3647.63   1
   1   5   1 76285.0 2653.08   1
  -1   5  -1 73558.2 2705.45   1
  -1  -5  -2 98204.8 3178.91   1
  -1   5  -2 95123.1 3251.94   1
   1   5   2 97926.0 3198.23   1
   1   5   3 30955.0 1459.18   3
  -1  -5  -3 32354.9 1446.37   1
   1   5   3 31460.7 1445.85   1
  -1   5  -3 31111.3 1518.21   1
  -1   5  -4 64163.7 2455.72   1
   1  -5   4 64482.0 2446.99   1
   1   5   4 63551.0 2387.56   3
  -1  -5  -4 65612.3 2343.65   1
   1   5   4 66541.2 2361.64   1
   1  -5   5-36.8434 150.478   1
  -1  -5  -5 25.8508 102.619   1
   1   5   5 144.315 151.951   3
   1   5   5 300.398 165.442   1
  -1   5  -5 303.678 197.721   1
   1   5   6 66341.5 2345.41   1
  -1   5  -6 62441.2 2457.36   1
   1   5   6 66490.8 2485.42   3
  -1  -5  -6 65301.9 2284.52   1
   1  -5   6 61926.9 2409.23   1
   1  -5   6 62537.7 2249.75   4
  -1   5  -7 8772.74 757.905   1
  -1  -5  -7 9286.57 665.072   1
   1  -5   7 9152.07 760.091   1
   1   5   7 10159.3 729.456   1
   1   5   7 9508.42 795.246   3
   1  -5   7 9195.85 694.366   4
  -1  -5  -7 9858.29 710.914   4
  -1  -5  -8 4428.49 489.160   4
  -1  -5  -8 4733.77 456.054   1
   1  -5   8 4499.69 526.214   1
  -1   5  -8 4758.10 549.425   1
   1   5   8 4824.64 582.610   3
  -1  -5  -8 5194.57 617.815   3
   1   5   8 4594.99 482.983   1
   1  -5   8 4809.37 514.665   4
   1  -5   9 810.880 256.965   4
  -1  -5  -9 615.559 252.740   3
  -1  -5  -9 694.014 167.592   1
  -1  -5  -9 722.991 211.446   4
  -1   5  -9 344.454 173.489   1
   1  -5  10 13135.1 961.674   4
  -1  -5 -10 12864.7 1056.91   3
  -1   5 -10 11777.6 898.051   1
  -1  -5 -10 13007.3 735.929   1
   1  -5  11 5247.14 628.124   4
   1  -5  11 4373.16 512.638   2
  -1  -5 -11 5049.25 403.884   1
  -1  -5 -11 6371.69 758.949   3
   1  -5  12 450.778 232.821   4
  -1  -5 -12 314.919 253.895   3
  -1  -5 -12 356.689 99.2895   1
   1  -5  12 501.277 193.571   2
   1  -5  12 370.727 175.831   1
   1  -5  13 10.4282 128.647   1
   1  -5  13 42.4886 169.894   4
  -1  -5 -13-9.90715 232.455   3
   1  -5  13 86.4818 169.679   2
   1  -5  14 12115.4 1104.35   4
  -1  -5 -14 13176.9 1242.92   3
   1  -5  15 1550.79 406.871   4
  -1  -5 -15 2781.86 601.419   3
  -1  -5 -16 10013.2 1193.26   3
   1  -5  16 9863.75 1086.78   4
  -1  -5 -17 886.878 492.828   3
   1  -5  17 1156.29 405.935   4
   1  -5  18 5208.74 880.131   4
  -1  -5 -18 4716.45 900.967   3
  -1   5 -19 2419.45 712.825   3
   1  -6 -18 3044.39 703.021   3
   1  -6 -17-546.255 456.131   3
   1  -6 -16 12.8963 399.597   3
  -1  -6  16-91.9424 266.184   4
   1  -6 -15 10941.6 1180.72   3
   1   6 -15 11498.0 955.929   1
  -1  -6  15 13104.1 1153.36   4
   1  -6 -14 13930.6 1289.33   3
  -1  -6  14 10945.2 1010.79   4
   1   6 -14 10974.9 942.590   1
   1  -6 -13 11145.7 1116.16   3
   1   6 -13 10991.6 940.171   1
  -1  -6  13 10079.4 862.417   1
  -1  -6  13 11985.6 994.492   4
  -1  -6  13 9232.57 616.140   2
   1  -6 -12 221.034 255.459   3
   1   6 -12 125.328 195.202   1
  -1  -6  12-97.7388 159.529   1
  -1  -6  12 258.438 169.500   4
   1  -6 -12-80.1210 123.317   1
  -1  -6  12 250.070 125.331   2
  -1  -6  11 29738.5 1605.83   1
   1   6 -11 27869.8 1605.16   1
   1  -6 -11 31260.9 1827.42   3
   1  -6 -11 29100.2 1430.73   1
  -1  -6  11 29391.8 1525.74   4
   1  -6 -10 6530.91 795.563   3
   1   6 -10 6148.36 700.351   1
   1  -6 -10 6528.39 620.451   1
  -1  -6  10 5997.12 604.512   4
  -1  -6  10 6448.76 694.033   1
   1  -6  -9 65974.0 2761.58   3
  -1  -6   9 65464.4 2643.73   1
  -1  -6   9 63229.7 2370.69   4
   1   6  -9 64922.6 2667.97   1
   1  -6  -9 66897.0 2492.39   1
  -1  -6   8 166.544 165.837   4
  -1  -6   8 67.0910 174.229   1
   1  -6  -8 73.7263 112.845   1
   1  -6  -8-54.1750 209.762   3
   1   6  -8-176.649 262.455   1
   1  -6  -7 37573.7 1740.53   1
  -1   6   7 40139.6 1887.60   3
  -1  -6   7 40586.3 1586.09   4
   1   6  -7 37479.2 1875.13   1
  -1  -6   7 38311.8 1836.78   1
   1  -6  -6 22818.8 1269.46   1
  -1  -6   6 22629.3 1313.04   1
  -1   6   6 23891.4 1328.43   3
  -1  -6   6 21594.5 1026.63   4
   1   6  -6 20893.8 1329.46   1
  -1   6   5 17252.1 1151.30   1
   1  -6  -5 18301.3 1123.60   1
  -1   6   5 18142.5 1130.51   3
   1   6  -5 18816.0 1216.07   1
  -1   6   4 12467.3 948.408   1
  -1   6   4 12384.1 888.050   3
   1  -6  -4 11556.9 880.091   1
   1   6  -4 12442.4 977.058   1
  -1   6   3 142.104 174.141   3
   1  -6  -3 33.2831 129.543   1
  -1   6   3 75.5449 159.728   1
   1   6  -3-6.80785 172.638   1
   1   6  -2 42618.0 1994.42   1
  -1   6   2 44823.6 2027.71   1
  -1   6   2 46349.8 1912.29   3
   1  -6  -2 46563.0 2011.21   1
   1   6  -1 189527. 5703.67   1
  -1   6   1 190296. 5741.66   1
   1   6   0 6324.57 651.509   1
  -1   6   0 5287.37 624.789   1
  -1   6  -1 7926.73 756.759   1
   1   6   1 7981.21 731.615   1
   1   6   2 15934.6 1059.98   1
  -1   6  -2 17130.3 1160.45   1
  -1  -6  -2 16465.1 1058.36   1
  -1   6  -3 43033.0 1990.35   1
   1   6   3 42559.2 1888.63   1
   1   6   3 41079.6 1878.55   3
  -1  -6  -3 43795.6 1889.94   1
  -1  -6  -4 9298.76 759.061   1
   1   6   4 9282.89 779.205   3
   1   6   4 8782.57 756.482   1
  -1   6  -4 7770.77 779.475   1
  -1  -6  -5 19327.3 1140.06   1
   1   6   5 19454.0 1169.84   1
  -1   6  -5 20934.6 1299.74   1
   1   6   5 19195.2 1201.09   3
   1   6   6 26033.2 1476.36   3
   1   6   6 27566.8 1430.78   1
  -1   6  -6 26608.2 1517.07   1
  -1  -6  -6 26386.7 1355.99   1
   1  -6   7 41218.1 1927.78   1
   1  -6   7 40624.3 1731.32   4
  -1   6  -7 40686.7 1964.54   1
  -1  -6  -7 41556.4 1780.28   1
   1   6   7 42243.1 1862.64   1
   1  -6   8 16777.6 1043.39   4
   1  -6   8 15741.8 1110.59   1
  -1  -6  -8 17619.5 1024.10   1
  -1  -6  -8 17245.8 1036.03   4
   1   6   8 17738.9 1089.08   1
  -1   6  -8 15175.4 1134.69   1
  -1   6  -9 9157.09 856.601   1
   1  -6   9 10393.5 841.081   4
  -1  -6  -9 9175.61 707.628   1
   1  -6   9 9675.38 839.072   1
  -1  -6 -10 174.059 132.975   1
  -1   6 -10-46.5070 192.901   1
   1  -6  10 203.997 156.359   4
   1  -6  10 142.030 138.389   1
  -1  -6 -11 3829.29 420.984   1
   1  -6  11 3545.90 520.236   1
  -1   6 -11 3648.10 526.806   1
   1  -6  11 4396.58 576.095   4
   1  -6  12 4327.49 560.027   1
   1  -6  12 5550.52 679.471   4
  -1  -6 -12 4591.94 418.681   1
  -1  -6 -12 4387.88 690.738   3
   1  -6  12 4503.59 553.770   2
  -1  -6 -13 19636.8 1528.44   3
   1  -6  13 20117.4 1379.22   4
   1  -6  13 16305.7 1071.54   2
   1  -6  14-229.276 162.763   2
   1  -6  14 242.239 226.645   4
  -1  -6 -14-473.078 355.685   3
  -1  -6 -15 1418.00 518.932   3
   1  -6  15 1199.66 402.933   4
  -1  -6 -16 2618.04 663.915   3
   1  -6  16 3212.59 633.022   4
  -1  -6 -17 124.571 336.198   3
   1  -6  17 293.373 342.952   4
   1  -6  18 396.635 363.768   4
  -1  -6 -18 40.2262 343.861   3
  -1  -7  17 6138.42 878.432   4
   1  -7 -17 6349.88 1037.69   3
  -1  -7  16-39.2223 218.771   4
   1  -7 -16-727.148 589.369   3
   1   7 -15 588.179 240.609   1
   1  -7 -15 1030.47 332.625   3
  -1  -7  15 1141.90 401.504   4
   1  -7 -14-204.061 293.431   3
  -1  -7  14-73.2793 201.068   4
   1   7 -14 19.8288 173.241   1
  -1  -7  13 2179.13 314.340   2
  -1  -7  13 3243.33 529.934   4
   1   7 -13 3121.90 549.446   1
   1  -7 -13 2914.36 598.823   3
   1  -7 -12 2317.79 520.432   3
   1   7 -12 1036.24 335.126   1
  -1  -7  12 1383.84 338.381   4
   1  -7 -12 1664.88 335.632   1
   1   7 -11 4262.34 615.925   1
  -1  -7  11 5004.86 591.356   4
   1  -7 -11 4360.94 549.446   1
  -1  -7  11 4876.42 670.303   1
  -1  -7  10 787.260 289.601   1
   1  -7 -10 876.237 283.615   1
  -1  -7  10 1095.88 276.273   4
   1   7 -10 884.049 292.612   1
  -1  -7   9 22290.3 1423.45   1
  -1  -7   9 21410.5 1183.11   4
   1  -7  -9 21600.7 1316.97   1
   1   7  -9 20263.9 1428.34   1
  -1  -7   8 187.615 132.791   1
   1  -7  -8 243.890 171.244   1
   1   7  -8 266.593 186.278   1
  -1  -7   8 478.087 177.516   4
  -1  -7   7 41658.0 1658.54   4
  -1  -7   7 42758.9 2042.36   1
   1   7  -7 38573.2 2073.08   1
   1  -7  -7 41512.4 1958.60   1
  -1  -7   6 253.014 102.511   4
   1   7  -6 416.841 236.657   1
   1  -7  -6 54.2202 120.353   1
  -1  -7   6 470.126 197.841   1
  -1   7   5 13688.5 1028.86   3
  -1   7   5 14146.0 1089.87   1
  -1  -7   5 13643.8 1068.41   1
   1  -7  -5 13402.1 1025.54   1
   1   7  -5 12870.7 1067.73   1
  -1   7   4 431.813 280.537   1
  -1   7   4 645.395 257.969   3
  -1  -7   4 522.541 248.436   1
   1   7  -4 728.483 297.911   1
   1  -7  -4 675.317 228.417   1
   1   7  -3 28804.3 1679.17   1
   1  -7  -3 31422.6 1670.84   1
  -1   7   3 29475.2 1679.50   1
  -1   7   3 32067.4 1625.98   3
   1  -7  -2 440.806 162.185   1
  -1   7   2 632.074 244.380   3
  -1   7   2 758.799 279.336   1
   1   7  -2 809.194 253.259   1
   1   7  -1 2442.20 454.541   1
  -1   7   1 1937.90 408.612   1
   1   7   0 925.650 318.346   1
  -1   7   0 680.829 298.833   1
  -1  -7  -1 37747.4 1819.57   1
  -1   7  -1 31589.4 1797.46   1
   1   7   1 34853.6 1798.90   1
   1   7   2 9412.37 867.313   1
  -1  -7  -2 10825.9 891.988   1
  -1   7  -2 10619.2 955.392   1
  -1  -7  -3 1329.39 316.077   1
   1   7   3 1635.77 364.854   1
  -1   7  -3 740.798 285.205   1
   1  -7   3 1024.90 295.296   1
   1   7   3 1445.01 330.425   3
  -1  -7  -4 11149.6 913.347   1
   1   7   4 10538.5 905.677   1
   1  -7   4 11230.7 982.045   1
  -1   7  -4 11536.6 1013.85   1
   1   7   4 11078.4 937.357   3
  -1   7  -5 19288.7 1377.13   1
   1   7   5 20203.5 1305.05   1
   1   7   5 20254.7 1316.64   3
  -1  -7  -5 21888.0 1309.21   1
   1  -7   5 21278.8 1396.79   1
   1  -7   6 2597.48 483.908   1
  -1  -7  -6 2129.80 375.409   1
   1   7   6 2414.63 461.882   1
  -1   7  -6 2036.92 444.665   1
   1  -7   7 4747.82 529.774   4
   1  -7   7 3863.10 577.996   1
  -1  -7  -7 3984.43 521.776   1
  -1   7  -7 3691.75 592.660   1
   1   7   7 3484.16 521.551   1
   1  -7   8 14219.0 1140.75   1
   1  -7   8 16705.2 1049.17   4
  -1   7  -8 14550.4 1179.64   1
   1   7   8 15178.0 1107.13   1
  -1  -7  -8 16283.1 1070.04   1
   1  -7   9 25499.2 1550.69   1
  -1   7  -9 25998.9 1625.26   1
  -1  -7  -9 26122.3 1390.73   1
   1  -7   9 27283.2 1453.41   4
   1  -7  10 4092.51 587.262   1
   1  -7  10 4238.17 550.810   4
  -1   7 -10 3425.77 551.651   1
  -1  -7 -10 3177.75 437.970   1
   1  -7  11 3780.28 567.479   1
   1  -7  11 4158.66 586.310   4
  -1   7 -11 3751.27 610.639   1
  -1  -7 -11 4070.80 480.483   1
   1  -7  12 1349.85 380.808   4
   1  -7  12 999.801 309.060   2
   1  -7  13 5846.55 740.950   4
   1  -7  13 4233.78 549.854   2
   1  -7  14 54.2390 196.113   2
   1  -7  14-109.019 254.599   4
   1  -7  15 5936.79 822.502   4
   1  -7  16 707.206 369.679   4
   1  -7  17 3772.84 665.403   4
  -1  -8  17 429.038 316.964   4
  -1  -8  16 89.1916 212.537   4
  -1  -8  15 12061.8 1117.24   4
   1   8 -15 10073.0 1033.73   1
  -1  -8  14 18703.5 1361.80   4
   1   8 -14 16833.1 1360.92   1
  -1  -8  13 3023.12 513.404   4
   1   8 -13 3348.82 613.290   1
   1   8 -12 1227.85 391.681   1
  -1  -8  12 897.705 321.877   4
   1   8 -11 448.321 296.675   1
  -1  -8  11 769.726 269.068   4
   1  -8 -10 8463.47 857.776   1
   1   8 -10 9747.33 1023.87   1
  -1  -8  10 9795.64 809.073   4
   1  -8  -9 26743.3 1596.83   1
   1   8  -9 24067.0 1698.22   1
  -1  -8   9 27025.1 1380.66   4
   1   8  -8 4495.02 709.445   1
   1  -8  -8 4292.29 605.475   1
  -1  -8   8 4336.36 490.872   4
  -1  -8   7 9622.31 701.686   4
   1   8  -7 8937.83 970.479   1
   1  -8  -7 9845.39 924.469   1
   1  -8  -6 49030.2 2289.33   1
   1   8  -6 44690.3 2338.04   1
   1   8  -5 24545.9 1635.82   1
   1  -8  -5 25733.7 1578.86   1
  -1   8   5 25652.7 1636.34   1
  -1   8   4 5802.45 735.187   1
   1  -8  -4 6675.49 761.285   1
   1   8  -4 6586.89 820.457   1
   1  -8  -3 1617.16 397.569   1
   1   8  -3 854.802 316.362   1
  -1   8   3 1737.30 371.936   3
  -1   8   3 1285.16 372.691   1
   1   8  -2 17863.9 1357.07   1
  -1   8   2 18617.9 1271.76   3
  -1   8   2 19668.0 1415.88   1
   1  -8  -2 19302.0 1369.91   1
  -1  -8   2 20984.5 1396.70   1
  -1  -8   1 67363.6 2816.07   1
  -1   8   1 62186.2 2821.93   1
   1   8  -1 62156.9 2787.58   1
   1  -8  -1 67093.6 2850.85   1
  -1  -8   0 30972.0 1744.85   1
   1   8   0 31631.7 1813.76   1
  -1   8   0 28936.0 1781.47   1
   1  -8   0 29869.3 1766.81   1
  -1   8  -1 1093.94 377.739   1
   1   8   1 2290.85 475.757   1
  -1  -8  -1 1748.83 393.469   1
   1  -8   1 1942.72 441.439   1
  -1  -8  -2 1669.27 372.286   1
   1   8   2 1661.57 402.947   1
  -1   8  -2 1263.53 376.089   1
   1  -8   2 1824.95 409.587   1
   1   8   3 17949.9 1313.63   1
  -1   8  -3 20021.6 1449.50   1
  -1  -8  -3 20707.7 1367.90   1
  -1   8  -4 83656.0 3477.57   1
  -1  -8  -4 88335.3 3326.53   1
   1   8   4 82656.4 3331.66   1
  -1  -8  -5 7673.19 792.249   1
   1   8   5 8304.83 869.608   1
  -1   8  -5 7223.60 875.676   1
  -1   8  -6 305.101 234.575   1
  -1  -8  -6 472.831 212.804   1
   1   8   6 488.006 269.526   1
   1   8   7 231.687 187.512   1
  -1   8  -7 540.656 337.016   1
  -1  -8  -7 135.897 174.787   1
   1  -8   8 45082.1 1978.08   4
  -1   8  -8 43979.4 2357.24   1
   1   8   8 47445.8 2280.19   1
  -1  -8  -8 45149.7 2120.00   1
  -1  -8  -9 13970.2 1040.56   1
   1  -8   9 13623.4 1004.32   4
  -1   8  -9 13125.8 1187.08   1
  -1  -8 -10 2104.73 396.326   1
  -1   8 -10 2828.50 599.576   1
   1  -8  10 2863.81 503.403   4
   1  -8  11 2392.46 455.068   4
  -1   8 -11 2490.66 550.808   1
   1  -8  12 9457.54 918.651   4
   1  -8  13 2950.38 536.830   4
   1  -8  13 1870.42 423.441   2
   1  -8  14 2803.48 555.665   4
   1  -8  15 656.821 324.355   4
   1  -8  16 3744.12 679.138   4
   1  -8  17 3393.52 678.241   4
  -1  -9  17 759.350 368.499   4
  -1  -9  16 2863.35 596.034   4
  -1  -9  15 45.8595 198.578   4
   1   9 -14 942.599 336.302   1
  -1  -9  14 482.092 231.830   4
  -1  -9  13 2722.31 492.284   4
   1   9 -13 2860.57 618.254   1
   1   9 -12 8966.53 1049.35   1
  -1  -9  12 8703.19 844.080   4
   1   9 -11 189.796 307.463   1
  -1  -9  11-143.025 168.103   4
  -1  -9  10 888.583 282.310   4
   1   9 -10 860.377 361.225   1
  -1  -9   9 4682.78 559.678   4
   1   9  -9 4838.37 770.898   1
  -1  -9   8 14616.7 956.212   4
   1   9  -8 14116.6 1316.03   1
   1   9  -7 7505.44 960.356   1
  -1  -9   7 8355.61 679.780   4
   1   9  -6-58.6068 277.067   1
   1   9  -5 456.206 305.757   1
  -1   9   5 880.717 365.077   1
  -1   9   4 5041.33 740.689   1
   1   9  -4 5933.97 798.802   1
   1   9  -3 42788.8 2322.13   1
  -1   9   3 41741.8 2309.56   1
   1   9  -2 3228.66 582.937   1
  -1   9   2 3739.15 659.892   1
   1   9  -1 1066.32 384.653   1
  -1   9   1 1224.14 396.848   1
   1   9   0 20929.2 1537.15   1
  -1   9   0 21582.2 1589.79   1
   1   9   1 4867.73 715.481   1
  -1   9  -1 6130.25 840.052   1
  -1   9  -2 25170.4 1766.99   1
   1   9   2 27284.7 1758.69   1
  -1   9  -3 27904.3 1875.83   1
   1   9   3 28933.7 1813.33   1
  -1   9  -4 889.108 350.331   1
   1   9   4 1448.38 429.355   1
  -1   9  -5 1292.43 459.746   1
   1   9   5 774.721 376.522   1
   1   9   6 16677.6 1344.22   1
  -1   9  -6 14756.1 1346.25   1
   1   9   7 4485.87 698.890   1
  -1   9  -7 3324.06 642.289   1
   1  -9   8 87.6728 156.578   4
   1   9   8 244.451 226.476   1
  -1   9  -8-76.5380 232.707   1
  -1   9  -9 1535.41 464.888   1
   1  -9   9 1562.05 376.202   4
   1  -9  10 21660.6 1378.66   4
  -1   9 -10 20416.0 1618.73   1
  -1   9 -11 7427.73 958.740   1
   1  -9  11 7021.47 787.369   4
   1  -9  12 947.733 312.765   4
   1  -9  13-243.560 245.701   4
   1  -9  14 2629.57 560.892   4
   1  -9  15 8620.37 991.238   4
   1  -9  16-48.2863 303.092   4
  -1 -10  16 737.020 384.854   4
  -1 -10  15 121.261 229.532   4
   1  10 -14 6272.80 918.139   1
  -1 -10  14 7433.05 864.461   4
   1  10 -13 1371.73 466.382   1
  -1 -10  13 957.885 313.217   4
  -1 -10  12 192.229 218.982   4
   1  10 -12 300.948 334.448   1
  -1 -10  11 4293.40 585.374   4
   1  10 -11 4653.30 815.925   1
  -1 -10  10 5885.06 653.230   4
   1  10 -10 5456.86 885.406   1
  -1 -10   9 1351.88 323.205   4
   1  10  -9 1149.89 468.885   1
   1  10  -8 13818.3 1396.76   1
  -1 -10   8 12914.1 912.133   4
   1  10  -7 6918.72 973.568   1
  -1 -10   7 7972.73 686.622   4
   1  10  -6 3760.33 726.770   1
  -1  10   5 9652.89 1098.59   1
   1  10  -5 8791.02 1069.68   1
  -1  10   4 10934.0 1170.32   1
   1  10  -4 9611.72 1107.15   1
  -1  10   3 1473.88 498.092   1
   1  10  -3 1525.12 427.510   1
   1  10  -2 9228.08 1067.22   1
  -1  10   2 10784.0 1166.96   1
  -1  10   1 16879.7 1480.03   1
   1  10  -1 19447.8 1561.13   1
   1  10   0 104.835 250.866   1
  -1  10   0 474.049 354.118   1
   1  10   1-106.676 188.150   1
  -1  10  -1 289.920 304.305   1
   1  10   2-98.9276 232.029   1
  -1  10  -2-184.842 329.985   1
   1  10   3 3797.33 689.404   1
  -1  10  -3 3542.79 682.348   1
  -1  10  -4 14566.8 1410.52   1
   1  10   4 14437.6 1339.13   1
   1  10   5-77.5867 249.377   1
  -1  10  -5 102.486 252.509   1
  -1  10  -6-52.4781 224.482   1
   1  10   6-280.451 283.456   1
  -1  10  -7 11176.0 1268.67   1
   1  10   7 12269.4 1233.61   1
  -1  10  -8 9121.64 1139.31   1
   1 -10   8 9978.20 869.073   4
   1  10   8 10672.0 1146.65   1
  -1  10  -9 4648.35 808.576   1
   1 -10   9 4271.23 589.473   4
  -1  10 -10 165.880 230.916   1
   1 -10  10 406.875 249.855   4
  -1  10 -11 2059.53 566.421   1
   1 -10  11 3196.19 548.403   4
   1 -10  12 2700.22 522.121   4
   1 -10  13 3352.56 578.713   4
   1 -10  14 330.385 327.502   4
   1 -10  15-384.428 331.112   4
   1 -10  16 1923.06 502.642   4
   1  11 -14 2338.94 600.881   1
  -1 -11  14 1652.61 393.543   4
  -1 -11  13 10265.1 967.969   4
   1  11 -13 9553.94 1192.50   1
  -1 -11  12 1282.80 346.115   4
   1  11 -12 1836.02 603.262   1
  -1 -11  11 12359.7 1003.73   4
   1  11 -11 10742.4 1289.15   1
   1  11 -10 406.786 273.492   1
  -1 -11  10 594.358 257.549   4
  -1 -11   9 1268.88 296.959   4
   1  11  -9 529.850 361.710   1
  -1 -11   8 12502.0 923.118   4
   1  11  -8 12498.8 1375.59   1
  -1 -11   7 27771.2 1423.06   4
   1  11  -7 28640.2 2118.55   1
   1  11  -6 1887.86 599.990   1
   1  11  -5-237.066 379.263   1
   1  11  -4 2120.42 586.561   1
  -1  11   4 2862.85 674.176   1
  -1  11   3 27340.5 2020.50   1
   1  11  -3 26184.5 1989.73   1
  -1  11   2 3611.98 767.857   1
   1  11  -2 2373.46 606.696   1
  -1  11   1 489.826 421.032   1
   1  11  -1-85.5446 230.420   1
   1  11   0 7431.91 1019.62   1
  -1  11   0 5513.68 890.580   1
  -1  11  -1 34309.0 2310.04   1
   1  11   1 32066.8 2200.16   1
   1  11   2 8743.60 1108.42   1
  -1  11  -2 8542.25 1143.69   1
  -1  11  -3 9919.52 1220.48   1
   1  11   3 11632.0 1271.54   1
  -1  11  -4 1837.14 527.166   1
   1  11   4 2372.94 626.626   1
  -1  11  -5 30581.0 2261.41   1
   1  11   5 33678.0 2234.20   1
  -1  11  -6 12558.6 1400.27   1
   1  11   6 13314.8 1367.94   1
  -1  11  -7 7957.97 1090.74   1
   1  11   7 9754.12 1167.98   1
   1  11   8 2059.97 529.520   1
  -1  11  -8 2124.37 614.938   1
   1 -11   8 2790.98 465.645   4
   1 -11   9 10314.7 919.450   4
  -1  11  -9 10253.4 1270.23   1
  -1  11 -10 2334.55 650.102   1
   1 -11  10 2772.14 500.664   4
   1 -11  11 9336.11 939.981   4
   1 -11  12 6209.13 780.634   4
   1 -11  13-215.986 272.832   4
   1 -11  14 654.381 355.751   4
   1 -11  15 5479.79 816.484   4
   1  12 -14 1455.60 448.146   1
   1  12 -13-355.160 437.174   1
   1  12 -12 1121.69 555.168   1
  -1 -12  11 1365.04 373.312   4
   1  12 -11 1060.75 466.698   1
   1  12 -10 10748.3 1362.82   1
  -1 -12  10 10824.6 919.121   4
   1  12  -9 685.901 365.895   1
  -1 -12   9 1420.60 360.074   4
  -1 -12   8 1411.96 316.453   4
   1  12  -8 1199.64 482.196   1
   1  12  -7-36.6348 286.642   1
  -1 -12   7 265.821 193.786   4
   1  12  -6 5803.63 1009.46   1
   1  12  -5 26.5172 339.865   1
   1  12  -4 1244.23 460.105   1
  -1  12   3 132.498 322.504   1
   1  12  -3 679.039 440.344   1
  -1  12   2 4157.07 850.473   1
   1  12  -2 6253.58 1006.84   1
  -1  12   1-5.76580 260.991   1
   1  12  -1-228.691 382.657   1
  -1  12   0 6903.21 1057.95   1
   1  12   0 8334.08 1125.89   1
  -1  12  -1-255.690 481.926   1
   1  12   1 1100.05 471.356   1
   1  12   2 15528.3 1568.25   1
  -1  12  -2 17054.7 1674.55   1
  -1  12  -3-80.7846 341.373   1
   1  12   3 258.149 316.496   1
  -1  12  -4 13944.1 1526.26   1
   1  12   4 12949.0 1423.69   1
   1  12   5 39.7211 305.107   1
  -1  12  -5 334.940 394.887   1
   1  12   6 3782.12 816.244   1
  -1  12  -6 4646.45 881.286   1
   1  12   7 175.447 270.300   1
  -1  12  -7-545.014 490.282   1
   1 -12   8 4187.57 599.620   4
  -1  12  -8 4297.57 878.350   1
  -1  12  -9 626.054 427.516   1
   1 -12   9 948.605 327.646   4
   1 -12  10 300.450 252.493   4
  -1  12 -10 371.730 341.340   1
   1 -12  11 4686.89 675.473   4
   1 -12  12 3350.31 605.124   4
   1 -12  13 1099.65 375.156   4
   1  13 -12 5098.28 1010.04   1
   1  13 -11-51.3983 280.202   1
   1  13 -10 2405.66 768.661   1
   1  13  -9 392.355 369.549   1
   1  13  -8 10562.4 1398.48   1
   1  13  -7 2662.19 758.382   1
  -1 -13   7 2603.05 434.688   4
   1  13  -6 2370.77 661.686   1
   1  13  -5 84.2162 367.627   1
   1  13  -4 11785.8 1465.18   1
   1  13  -3 4460.19 863.562   1
  -1  13   2 13477.7 1570.37   1
   1  13  -2 14698.5 1622.90   1
  -1  13   1-95.5904 299.994   1
   1  13  -1-764.287 552.091   1
  -1  13   0 5616.40 1011.33   1
   1  13   0 4928.76 936.230   1
  -1  13  -1 10191.1 1366.60   1
   1  13   1 7876.25 1202.00   1
   1  13   2 13071.4 1508.89   1
  -1  13  -2 12147.2 1491.62   1
  -1  13  -3 281.346 354.821   1
   1  13   3-545.616 461.550   1
  -1  13  -4-234.053 375.682   1
   1  13   4 964.259 415.116   1
   1  13   5 2887.77 732.350   1
  -1  13  -5 2456.39 711.491   1
  -1  13  -6 7224.05 1175.31   1
   1  13   6 6051.09 1019.11   1
  -1  13  -7 960.152 395.113   1
   1  13   7 297.068 326.034   1
  -1  13  -8-714.476 361.947   1
   1 -13   8-165.827 175.862   4
   1 -13   9 4498.88 645.394   4
   1 -13  10 2751.41 523.749   4
   1 -13  11 3809.88 648.031   4
   1  14  -9 2696.14 823.343   1
   1  14  -8-78.3802 332.610   1
   1  14  -7 1318.30 607.901   1
   1  14  -6 4683.51 979.554   1
   1  14  -5 12475.5 1562.83   1
   1  14  -4 9827.47 1367.07   1
   1  14  -3-634.465 542.329   1
   1  14  -2 913.667 554.818   1
   1  14  -1 11049.3 1448.70   1
  -1  14   0 1672.46 598.864   1
   1  14   0 3006.22 831.916   1
  -1  14  -1 3713.25 896.439   1
   1  14   1 5179.77 1053.03   1
  -1  14  -2 648.677 372.050   1
   1  14   2 859.689 631.188   1
  -1  14  -3 17507.5 1907.61   1
   1  14   3 17708.3 1870.21   1
   1  14   4 3892.67 856.539   1
  -1  14  -4 4037.16 898.865   1
  -1  14  -5 5694.90 1085.97   1
   1  14   5 5831.05 1092.27   1
   1  14   6 97.8012 302.889   1
  -1  14  -6-660.370 484.867   1
  -1  14  -7 4388.99 1034.85   1
   1  15  -2 664.860 491.611   1
   1  15  -1 60.6383 340.939   1
   1  15   0 4252.00 1009.52   1
   1  15   1 347.690 463.270   1
   1  15   2 720.516 489.583   1
   1  15   3 1249.79 561.231   1
   1  15   4 316.162 455.898   1
   1  15   5 733.454 532.014   1
   2   0 -20 7907.09 1250.74   3
   2   0 -19 379.451 352.167   3
   2   0 -18 602.493 513.996   3
   2   0 -17-317.769 431.445   3
   2   0 -16 20808.9 1649.16   3
   2   0 -15 148.368 255.830   3
   2   0 -14 11977.4 1118.64   3
   2   0 -13-22.8207 267.309   3
   2   0 -13 2.64176 37.5801   1
   2   0 -12 11671.7 545.912   1
   2   0 -11 36.6363 64.7099   2
   2   0 -11 78.4218 70.9095   1
   2   0 -11-97.2774 149.505   4
   2   0 -10 109736. 3058.65   2
   2   0 -10 114388. 3549.93   4
   2   0 -10 108514. 3068.54   1
   2   0  -9 65.1146 65.7767   1
   2   0  -9 95.2327 70.5782   2
   2   0  -9-124.124 137.259   4
   2   0  -8 2535.00 321.062   4
   2   0  -8 2576.96 253.193   1
   2   0  -8 2294.27 205.411   2
   2   0  -7 34.7864 59.1413   1
   2   0  -7 72.1638 88.4085   4
   2   0  -6 64811.1 2053.49   4
   2   0  -6 63050.3 1917.29   1
   2   0  -5 136.447 77.1974   1
   2   0  -4 1340.19 167.710   1
   2   0  -3-38.0649 63.8715   1
   2   0  -2-0.16243 411.907   1
   2   0  -1 21.0361 43.7663   1
   2   0   0 3495.63 216.250   2
   2   0   1 34.5739 64.7489   2
   2   0   2 36792.2 1191.20   2
   2   0   2 32028.8 967.755   3
  -2   0  -2 32743.6 984.107   3
   2   0   3 58.6083 73.5795   2
  -2   0  -3 154.360 76.3190   3
  -2   0  -4 230661. 5961.32   3
   2   0   4 231734. 5793.15   1
  -2   0  -4 232916. 6046.47   4
   2   0   4 237690. 6132.90   2
  -2   0  -4 229771. 6110.17   2
  -2   0  -5-60.6713 99.6393   2
  -2   0  -5 54.7194 63.8688   4
  -2   0  -5 31.9404 72.8775   3
   2   0   5-14.2158 31.7572   1
  -2   0  -6 19976.0 923.758   4
   2   0   6 17679.3 603.309   1
   2   0   6 18103.7 588.679   1
  -2   0  -6 20684.4 959.339   2
  -2   0  -6 19202.8 886.080   3
  -2   0  -7 32.6534 111.606   2
  -2   0  -7 200.588 129.279   4
  -2   0  -7 25.6976 121.759   3
  -2   0  -8 32772.5 1439.34   3
  -2   0  -8 34616.5 1463.96   4
  -2   0  -8 33520.9 1449.62   2
  -2   0  -9 216.492 162.459   3
  -2   0  -9 121.175 125.622   4
  -2   0  -9 10.0858 119.392   2
   2   0  10 10716.2 848.752   4
  -2   0 -10 10712.5 830.402   3
  -2   0 -11 122.325 158.620   3
   2   0  11 140.372 187.277   4
  -2   0 -12 57353.1 2497.02   3
   2   0  12 63431.6 2632.31   4
   2   0  13-102.527 196.162   4
  -2   0 -13-360.202 284.407   3
  -2   0 -14 219.366 243.629   3
  -2   0 -15-793.511 391.347   3
  -2   0 -16 5168.15 782.292   3
  -2   0 -17-80.6893 319.482   3
  -2   0 -18 3617.21 707.936   3
  -2   0 -19-828.370 466.706   3
  -2   0 -20 4063.43 826.370   3
   2   1 -20 471.456 584.203   3
   2  -1 -20 637.002 507.262   3
   2  -1 -19-182.253 383.436   3
   2   1 -19 154.864 470.105   3
   2  -1 -18 4358.16 795.208   3
   2   1 -18 4189.76 891.755   3
   2  -1 -17 6332.95 957.599   3
   2   1 -17 5194.57 861.519   3
   2   1 -16 176.137 359.785   3
   2  -1 -16 569.636 363.972   3
   2  -1 -15 427.332 327.125   3
   2  -1 -15 262.596 156.005   2
   2  -1 -14 17697.1 1351.57   3
   2  -1 -14 17863.8 920.364   2
   2   1 -14 14686.7 611.206   1
   2  -1 -13 2951.62 343.633   2
   2  -1 -13 1929.72 141.564   1
   2  -1 -13 1887.31 150.965   1
   2   1 -13 2332.23 235.890   1
   2  -1 -13 2213.79 472.442   3
   2   1 -12 1074.86 175.898   1
   2  -1 -12 1207.36 149.502   1
   2  -1 -12 1220.11 225.451   2
   2  -1 -12 1294.50 170.646   1
   2  -1 -12 1402.70 405.866   3
   2   1 -11 650.470 193.720   4
   2   1 -11 659.326 148.772   1
   2  -1 -11 835.205 186.951   2
   2  -1 -11 539.005 296.109   3
   2  -1 -11 524.225 109.480   1
   2  -1 -10 6061.54 384.689   1
   2  -1 -10 6688.25 600.020   4
   2   1 -10 5456.86 413.396   1
   2  -1 -10 5432.39 624.047   3
   2   1 -10 5807.94 548.773   4
   2   1  -9 23359.0 1126.60   4
   2  -1  -9 22645.3 1155.94   4
   2   1  -9 22569.5 953.458   1
   2  -1  -9 22617.1 892.874   1
   2   1  -8 2901.05 294.382   1
   2  -1  -8 3277.98 377.748   4
   2   1  -8 2941.22 338.438   4
  -2  -1   8 2940.29 282.110   1
   2  -1  -8 2840.63 265.733   1
   2   1  -7 585.705 131.157   1
   2  -1  -7 506.612 105.235   1
   2   1  -7 642.303 151.155   4
  -2  -1   7 552.519 121.315   1
  -2  -1   6 10810.3 573.201   1
   2   1  -6 11235.0 598.518   1
   2   1  -6 12017.2 618.475   4
   2   1  -5 14643.6 688.047   1
   2   1  -5 15960.9 684.355   4
  -2  -1   5 15555.0 693.555   1
   2   1  -4 43939.2 1450.53   1
   2   1  -4 46294.5 1388.02   4
   2   1  -3 14364.8 2515.63   4
   2   1  -3 168833. 3075.81   1
   2   1  -2 9888.09 584.534   1
   2   1  -1 160.715 195.853   1
   2   1   0 540.772 101.035   1
   2   1   1 3593.66 547.761   1
   2   1   2 11148.6 503.225   3
   2   1   2 10327.2 466.602   1
  -2  -1  -2 11649.7 478.344   4
  -2  -1  -2 10861.3 482.876   1
   2   1   3 66814.8 1914.69   1
  -2  -1  -3 73504.9 2070.01   3
  -2  -1  -3 70296.9 1930.18   1
  -2  -1  -3 69250.3 2001.79   4
   2   1   3 67368.5 2012.36   3
   2   1   4 34997.6 1074.89   1
  -2  -1  -4 35916.0 1276.58   3
   2  -1   4 35422.4 1327.99   2
  -2  -1  -4 35677.5 1075.26   1
  -2  -1  -4 35950.7 1249.61   4
  -2  -1  -4 35221.2 1322.25   2
   2   1   4 33451.9 1232.75   3
   2  -1   5 58321.3 1754.64   1
  -2  -1  -5 60821.9 1946.60   3
  -2  -1  -5 61435.8 1930.83   4
  -2  -1  -5 57936.0 1988.41   2
   2  -1   5 59831.4 1980.82   2
   2   1   5 57378.8 1629.74   1
   2   1   5 58666.9 1920.89   3
  -2  -1  -6 26985.0 1135.82   4
  -2  -1  -6 27138.1 1156.39   3
  -2  -1  -6 26047.9 1171.96   2
   2  -1   6 27899.7 1171.44   2
   2   1   6 23893.0 775.879   1
   2  -1   6 27264.6 915.056   1
  -2  -1  -7 16419.0 887.048   4
   2  -1   7 15360.4 852.514   2
  -2  -1  -7 15769.9 879.665   3
   2  -1   7 14696.5 600.010   1
  -2  -1  -7 16867.5 921.146   2
  -2  -1  -8 41834.6 1677.22   2
  -2  -1  -8 42312.2 1654.76   4
  -2  -1  -8 39809.6 1646.86   3
   2  -1   8 37217.7 1150.17   1
  -2   1  -9 16360.8 976.916   3
  -2  -1  -9 16790.4 1028.77   3
  -2  -1  -9 16350.8 990.254   4
  -2  -1  -9 15601.9 978.872   2
  -2  -1 -10 448.079 193.519   2
  -2  -1 -10 201.769 168.723   3
   2   1  10 377.575 212.868   4
   2  -1  10 279.757 158.411   4
  -2   1 -10 169.312 168.173   3
   2  -1  11 2154.07 416.969   4
  -2   1 -11 1662.87 359.573   3
  -2  -1 -11 1974.71 416.568   3
  -2  -1 -11 2225.80 388.890   2
  -2  -1 -12 817.024 257.080   2
   2  -1  12 917.307 332.278   4
  -2  -1 -12 669.435 286.068   3
  -2   1 -12 454.705 244.827   3
   2  -1  13 17319.4 1279.06   4
  -2   1 -13 13967.2 1147.41   3
  -2  -1 -13 14935.9 1177.87   3
  -2  -1 -13 16356.3 1129.46   2
  -2  -1 -14 8998.66 938.178   3
  -2   1 -14 7480.74 855.378   3
   2  -1  14 9609.01 986.047   4
  -2   1 -15 2651.16 574.226   3
  -2  -1 -15 2467.40 548.623   3
  -2  -1 -16 3147.97 673.902   3
  -2   1 -16 3189.42 643.733   3
  -2  -1 -17 11675.2 1255.39   3
  -2   1 -17 14245.0 1363.08   3
  -2  -1 -18 1147.93 482.616   3
  -2   1 -18 1170.82 468.470   3
  -2  -1 -19 4418.22 834.354   3
  -2   1 -19 3386.48 780.991   3
  -2   1 -20 699.267 545.100   3
  -2  -1 -20 312.608 362.880   3
   2   2 -20 2569.98 822.811   3
   2  -2 -20 2197.09 670.780   3
   2  -2 -19 5579.52 947.092   3
   2   2 -19 4261.16 909.405   3
   2   2 -18 1134.72 495.450   3
   2  -2 -18 1417.33 510.258   3
   2  -2 -17 1989.50 576.487   3
   2  -2 -16 3025.80 649.654   3
   2  -2 -15 35016.9 2109.27   3
   2  -2 -15 38349.1 1652.34   2
   2   2 -15 35261.4 1247.18   1
   2  -2 -14 2013.74 518.970   3
   2   2 -14 3130.37 310.143   1
   2  -2 -14 2788.88 390.285   2
   2  -2 -13 38.3698 39.7516   1
   2   2 -13 3.63336 88.9825   1
   2  -2 -13 139.270 118.851   2
   2  -2 -13 55.2734 45.6417   1
   2  -2 -12 366.478 256.537   3
   2   2 -12 476.174 158.487   1
   2  -2 -12 551.982 118.101   1
   2  -2 -12 454.180 103.586   1
   2  -2 -11 16637.2 768.464   1
   2   2 -11 16466.0 859.113   1
   2  -2 -11 15463.5 703.033   1
   2  -2 -11 16595.3 1153.29   3
   2   2 -11 17477.7 1035.72   4
  -2  -2  11 15694.1 805.952   1
  -2  -2  10 1096.16 201.273   1
   2  -2 -10 1215.58 262.828   4
   2  -2 -10 1382.75 335.482   3
   2  -2 -10 832.059 152.342   1
   2   2 -10 1228.36 224.600   1
   2   2 -10 1443.71 275.871   4
   2  -2 -10 1133.52 184.079   1
   2   2  -9 1048.38 207.807   1
  -2  -2   9 853.702 183.565   1
   2   2  -9 1156.49 229.068   4
   2  -2  -9 1136.71 245.514   4
  -2  -2   8 417.497 118.606   1
   2   2  -8 679.704 170.306   4
   2   2  -8 707.607 171.742   1
   2   2  -7 128462. 3724.10   1
  -2  -2   7 127831. 3685.11   1
  -2  -2   7 138980. 3769.44   4
   2   2  -7 127737. 3678.10   4
   2   2  -6 205.079 102.170   1
   2   2  -6 210.267 81.5918   4
  -2  -2   6 149.579 81.4952   1
  -2  -2   6 251.630 97.3381   4
   2   2  -5 5444.46 349.464   4
   2   2  -5 5395.27 418.736   1
  -2  -2   5 5365.14 362.409   4
  -2  -2   5 5261.39 400.943   1
   2   2  -4 11666.9 495.055   4
   2   2  -4 10870.5 620.443   1
  -2  -2   4 11746.2 512.130   4
  -2  -2   3 168778. 4251.93   4
  -2   2   3 167854. 4490.90   3
   2   2  -3 167173. 4237.78   4
   2   2  -3 172607. 4568.74   1
  -2  -2   2 11778.2 379.836   4
  -2   2   2 12565.8 564.677   3
   2   2  -2 11116.0 604.243   1
   2   2  -2 11484.5 373.410   4
  -2   2   1 36867.0 1138.58   3
   2   2  -1 35091.8 1271.39   1
  -2   2   0 23275.7 764.546   3
   2   2   0 23165.9 917.927   1
   2   2   1 88297.5 2552.86   1
  -2  -2  -1 89039.6 2307.49   4
  -2  -2  -2 10285.0 523.726   1
  -2  -2  -2 10431.3 451.939   4
   2   2   2 10566.9 466.817   4
   2   2   2 10295.5 533.810   1
  -2  -2  -3 104982. 2931.23   1
  -2  -2  -3 103907. 2915.71   4
   2  -2   3 109564. 3099.18   1
   2   2   3 110795. 2978.77   1
   2   2   3 108101. 3076.96   3
   2  -2   4 477.618 116.604   1
   2   2   4 161.727 83.4571   1
  -2  -2  -4 92.1902 52.5072   1
  -2  -2  -4 239.617 145.198   3
   2   2   4 313.599 121.898   3
  -2  -2  -4 190.096 70.8492   4
   2   2   5 1895.98 201.242   1
  -2  -2  -5 1722.08 233.859   4
   2   2   5 1975.63 274.916   3
   2  -2   5 1644.92 225.442   1
  -2  -2  -5 1666.30 171.361   1
  -2  -2  -5 1889.71 269.919   3
   2  -2   6 9230.99 553.926   1
  -2  -2  -6 10321.7 640.546   4
   2   2   6 10759.1 492.980   1
  -2  -2  -6 10542.1 703.209   3
  -2  -2  -6 10542.5 465.914   1
   2  -2   6 10257.5 672.776   2
   2   2   6 10405.4 685.118   3
  -2  -2  -7 30331.6 944.122   1
   2  -2   7 30362.7 1324.21   2
   2   2   7 30137.7 1368.93   3
   2  -2   7 28891.0 1121.79   1
  -2  -2  -7 30208.5 1301.50   4
  -2  -2  -7 31349.9 1407.75   3
  -2  -2  -7 30353.6 1385.68   2
   2   2   7 30577.3 968.671   1
   2  -2   8 188.415 144.177   2
  -2  -2  -8 114.154 117.588   4
  -2  -2  -8 141.373 108.707   2
  -2  -2  -8 77.2255 135.095   3
   2  -2   8 154.017 76.9847   1
  -2  -2  -9 297.273 204.210   2
   2  -2   9 315.192 99.4682   1
  -2  -2  -9 371.756 157.945   4
  -2  -2  -9 21.0571 168.119   3
   2  -2   9 106.087 143.398   4
   2  -2   9 212.623 156.775   2
   2  -2  10 52431.8 2153.89   4
   2  -2  10 49050.5 1948.25   2
  -2  -2 -10 51380.8 2174.64   3
  -2  -2 -10 53750.9 2150.59   2
   2  -2  10 47368.9 1526.91   1
  -2  -2 -11 10722.7 927.162   3
  -2  -2 -11 12002.8 924.058   2
   2  -2  11 11278.2 930.331   4
   2  -2  12 9589.82 889.795   4
  -2  -2 -12 9544.82 918.137   3
  -2   2 -12 9384.15 886.968   3
  -2  -2 -12 9349.45 846.789   2
  -2  -2 -13 1134.44 369.029   3
  -2   2 -13 913.920 314.502   3
   2  -2  13 1320.61 371.817   4
  -2   2 -14 9008.03 962.234   3
   2  -2  14 10399.1 1013.59   4
  -2  -2 -14 9574.67 989.705   3
   2  -2  15 8727.80 974.506   4
  -2  -2 -15 7045.07 904.553   3
  -2   2 -15 6517.09 846.752   3
  -2   2 -16-72.5540 335.027   3
  -2  -2 -16 70.7258 273.007   3
   2  -2  16 692.831 405.407   4
  -2   2 -17 3417.80 706.296   3
  -2  -2 -17 4718.54 799.462   3
  -2   2 -18 3438.14 746.854   3
  -2  -2 -18 3064.51 613.658   3
  -2  -2 -19 261.743 363.818   3
  -2   2 -19 85.3436 372.150   3
  -2   2 -20-575.090 450.964   3
   2   3 -20-920.753 595.565   3
   2   3 -19 261.788 408.584   3
   2  -3 -19 452.404 500.419   3
   2  -3 -18 7738.09 1090.60   3
   2  -3 -17 11.2758 400.219   3
   2  -3 -16 12838.5 1265.29   3
   2  -3 -15 459.777 296.521   3
   2   3 -15 339.755 150.684   1
   2   3 -14 20789.9 976.414   1
   2  -3 -14 19647.8 1435.59   3
  -2  -3  13 13942.4 808.205   1
   2   3 -13 13386.1 822.069   1
   2  -3 -13 13838.4 652.731   1
   2  -3 -13 14035.6 620.624   1
   2  -3 -13 14497.8 1207.84   3
   2  -3 -12 71612.9 2178.50   1
   2  -3 -12 73050.5 2249.97   1
   2   3 -12 72395.3 2480.65   1
  -2  -3  12 74113.1 2457.01   1
   2  -3 -12 69452.4 2936.93   3
  -2  -3  11 821.985 212.539   1
   2   3 -11 1038.00 228.376   4
   2   3 -11 1118.62 245.382   1
  -2  -3  11 731.489 223.922   4
   2  -3 -11 977.058 190.882   1
   2  -3 -11 1495.20 378.780   3
  -2  -3  10 7939.91 607.367   1
   2  -3 -10 8015.36 563.586   1
   2  -3 -10 7369.26 745.366   3
   2   3 -10 8494.94 650.666   4
   2   3 -10 8183.69 638.735   1
   2  -3 -10 8866.71 727.515   4
  -2  -3  10 9397.50 728.499   4
  -2  -3   9 16228.2 906.316   1
   2   3  -9 17584.4 980.460   1
   2  -3  -9 19976.3 945.938   1
  -2  -3   9 18448.2 989.138   4
   2   3  -9 16472.8 907.024   4
  -2  -3   8 58281.8 1989.32   1
  -2  -3   8 60601.4 2000.35   4
   2   3  -8 56509.5 1921.34   4
   2   3  -8 60724.5 2080.52   1
   2  -3  -8 59098.0 1981.93   1
  -2  -3   8 51630.5 1518.01   2
  -2  -3   7 1372.64 243.746   1
   2  -3  -7 1486.68 247.681   1
   2   3  -7 1467.11 214.125   4
  -2  -3   7 1288.18 211.795   4
   2   3  -7 1452.25 270.730   1
   2   3  -6 142.359 84.4148   4
   2   3  -6 95.5790 81.1653   1
  -2  -3   6 150.582 105.728   1
   2  -3  -6 204.812 115.092   1
  -2  -3   6 308.868 121.243   4
   2  -3  -5 2634.64 320.204   1
   2   3  -5 2471.46 318.684   1
  -2  -3   5 2365.88 230.383   4
  -2  -3   5 2675.68 318.977   1
  -2   3   5 3222.59 361.642   3
   2   3  -5 1056.63 157.303   4
  -2   3   4 111350. 3161.78   3
   2   3  -4 104530. 3185.50   1
   2  -3  -4 106070. 3200.88   1
  -2  -3   4 102750. 2816.58   4
   2  -3  -3 16549.6 864.146   1
   2   3  -3 14581.1 811.990   1
  -2   3   3 16701.6 781.276   3
  -2  -3   3 14656.7 541.579   4
   2   3  -2 5240.25 450.529   1
  -2  -3   2 5745.88 242.455   4
  -2   3   2 6084.85 417.157   3
   2   3  -1 30084.4 1261.10   1
  -2   3   1 34440.2 1167.12   3
   2   3   0 289589. 7566.55   1
   2   3   1 21764.9 982.350   1
  -2  -3  -1 22878.7 997.667   1
   2   3   2 125505. 3543.27   1
  -2  -3  -2 120743. 3520.69   1
  -2  -3  -2 123590. 3270.64   4
  -2  -3  -3 62178.5 1866.49   4
   2   3   3 58733.6 2063.42   3
   2  -3   3 66572.9 2158.03   1
   2   3   3 63010.1 2028.14   1
  -2  -3  -3 61272.2 2002.55   1
  -2  -3  -4 65416.5 2041.70   4
   2  -3   4 66854.1 2226.62   1
   2   3   4 69762.0 2140.55   1
   2   3   4 64705.0 2220.18   3
  -2  -3  -4 64856.0 2068.34   1
   2   3   5 16937.7 951.754   3
  -2  -3  -5 19170.7 890.897   4
   2   3   5 20079.7 882.066   1
   2  -3   5 20605.3 982.763   1
  -2  -3  -5 19824.6 847.928   1
   2  -3   6 23341.7 1096.71   1
   2   3   6 25175.8 1000.07   1
  -2  -3  -6 25303.1 1114.51   4
   2   3   6 23886.0 1196.19   3
  -2  -3  -6 25382.7 1252.40   3
  -2  -3  -6 24336.9 953.405   1
   2  -3   7 1328.70 250.743   4
  -2  -3  -7 1191.60 163.620   1
   2   3   7 1510.38 198.052   1
   2   3   7 1429.25 274.314   3
  -2  -3  -7 1294.83 280.754   3
  -2  -3  -7 1212.87 229.315   4
   2  -3   7 1388.34 230.495   1
   2  -3   8 2269.71 359.783   4
   2   3   8 2929.14 262.183   1
   2  -3   8 2486.95 311.248   1
  -2  -3  -8 2381.83 224.042   1
   2   3   8 2594.73 409.411   3
  -2  -3  -8 2443.87 335.668   4
   2  -3   8 2619.56 369.407   2
  -2  -3  -8 2757.68 427.475   3
  -2  -3  -9 7589.83 374.319   1
   2  -3   9 7410.65 678.708   4
   2  -3   9 6895.50 610.370   2
  -2  -3  -9 7923.97 756.683   3
  -2  -3  -9 7933.43 669.209   4
   2  -3   9 8053.20 556.077   1
   2  -3  10 52511.7 2110.97   2
   2  -3  10 56633.6 2297.90   4
  -2  -3 -10 55195.3 2374.82   3
   2  -3  10 54566.9 1871.66   1
  -2  -3 -10 58892.7 2354.61   2
   2  -3  11 817.801 258.025   4
   2  -3  11 890.512 178.367   1
  -2  -3 -11 630.144 314.652   3
  -2  -3 -11 573.788 231.440   2
   2  -3  11 625.701 209.178   2
   2  -3  12 183.333 203.547   4
   2  -3  12 171.162 79.2310   1
  -2  -3 -12 169.130 204.487   3
  -2  -3 -13 5102.84 754.332   3
   2  -3  13 5308.58 697.161   4
   2  -3  13 4031.90 282.514   1
   2  -3  14 14287.8 1216.48   4
  -2  -3 -14 12899.1 1209.40   3
  -2  -3 -15 638.369 327.992   3
  -2   3 -15 184.137 277.188   3
   2  -3  15 261.807 331.138   4
   2  -3  16 1447.69 480.455   4
  -2   3 -16 354.013 288.427   3
  -2  -3 -16 1922.98 549.107   3
  -2  -3 -17 1058.02 452.298   3
   2  -3  17 622.788 310.400   4
  -2   3 -17 37.9006 306.095   3
  -2  -3 -18 2958.01 664.949   3
  -2   3 -18 1579.97 464.200   3
  -2   3 -19 813.785 549.173   3
  -2  -3 -19 1034.04 495.189   3
   2  -4 -19 438.512 365.095   3
   2  -4 -18 535.453 389.067   3
   2  -4 -17 1521.89 534.811   3
   2  -4 -16 3125.23 629.150   3
   2   4 -15 831.925 229.154   1
   2  -4 -15 1266.72 422.438   3
   2  -4 -14 596.920 119.742   1
   2  -4 -14 531.238 122.171   1
   2   4 -14 336.170 155.761   1
  -2  -4  14 436.040 167.264   1
   2  -4 -14 57.8529 293.122   3
  -2  -4  13 29.0431 91.3971   1
   2  -4 -13 128.807 76.4811   1
   2  -4 -13 160.770 105.694   1
   2  -4 -13-188.783 297.269   3
   2   4 -13 83.4857 108.724   1
   2  -4 -12 12798.9 1089.02   3
   2   4 -12 12080.5 861.620   1
  -2  -4  12 11918.1 829.209   1
  -2  -4  12 13299.8 977.542   4
   2  -4 -12 12041.6 721.365   1
   2   4 -11 2969.25 422.662   1
  -2  -4  11 2829.78 418.344   4
  -2  -4  11 3230.97 431.241   1
   2  -4 -11 2968.96 362.453   1
   2  -4 -11 2739.01 494.712   3
  -2  -4  10 6274.08 582.065   4
   2  -4 -10 5759.30 648.572   3
   2   4 -10 5631.36 574.588   1
  -2  -4  10 4685.25 297.140   2
  -2  -4  10 5380.56 536.636   1
   2  -4 -10 5475.60 491.180   1
   2  -4  -9 860.066 187.002   1
  -2  -4   9 883.501 210.977   1
  -2  -4   9 824.959 211.437   4
   2   4  -9 788.423 222.603   1
   2  -4  -8 32673.1 1400.43   1
  -2  -4   8 29665.4 1281.60   4
  -2  -4   8 28845.2 1386.10   1
   2   4  -8 29556.3 1442.51   1
  -2  -4   7 22647.7 1008.08   4
  -2  -4   7 21658.5 1166.53   1
   2  -4  -7 23429.0 1156.35   1
  -2   4   7 22533.3 1239.09   3
   2   4  -7 22591.5 1207.63   1
  -2   4   6 34154.0 1515.72   3
  -2  -4   6 31749.4 1460.71   1
   2   4  -6 33282.8 1511.65   1
  -2  -4   6 32906.7 1220.61   4
   2  -4  -6 33178.2 1456.82   1
   2   4  -5 487.059 186.161   1
  -2  -4   5 218.170 78.2337   4
  -2  -4   5 279.119 127.879   1
  -2   4   5 172.253 151.669   3
   2  -4  -5 183.650 109.769   1
   2  -4  -4 7980.00 632.674   1
  -2   4   4 8531.39 611.591   3
  -2  -4   4 7933.15 423.482   4
   2   4  -4 7938.64 641.750   1
   2   4  -3 15734.1 932.082   1
   2  -4  -3 16110.3 945.489   1
  -2  -4   3 16491.8 617.960   4
  -2   4   3 16540.0 860.421   3
  -2   4   2 56393.2 1907.00   3
   2   4  -2 54174.1 2035.51   1
   2   4  -1 209.371 140.506   1
  -2   4   1 297.331 128.714   3
   2   4   0 9173.97 667.980   1
  -2  -4  -1 34236.4 1421.56   1
   2   4   1 33489.8 1437.90   1
   2   4   2 39302.5 1567.72   1
  -2   4  -2 36735.9 1624.63   1
  -2  -4  -2 39651.0 1541.51   1
  -2   4  -3 45592.2 1836.83   1
  -2  -4  -3 45934.1 1698.13   1
   2   4   3 44062.5 1715.31   1
   2   4   3 41916.9 1736.90   3
   2  -4   3 46749.8 1813.01   1
   2   4   4 444.650 161.000   1
  -2  -4  -4 389.646 135.189   1
   2  -4   4 29.6421 87.3564   1
  -2  -4  -4 341.349 89.5342   4
   2   4   4 333.959 171.097   3
  -2  -4  -5 21417.6 973.317   4
   2  -4   5 21219.9 1116.40   1
   2   4   5 21740.3 1047.28   1
   2   4   5 21671.6 1144.14   3
  -2  -4  -5 20728.7 1000.18   1
   2   4   6 73530.5 2357.10   1
  -2  -4  -6 71088.1 2350.33   4
   2   4   6 67075.4 2522.31   3
   2  -4   6 71887.8 2467.09   4
   2  -4   6 68673.6 2463.32   1
  -2  -4  -6 71547.2 2300.57   1
   2   4   7 6566.46 505.851   1
   2  -4   7 6618.47 584.241   1
  -2  -4  -7 5940.76 524.233   4
  -2  -4  -7 5863.72 456.190   1
   2   4   7 6235.56 615.019   3
   2  -4   7 7688.52 634.338   4
   2   4   8 7663.14 538.315   1
   2   4   8 7519.91 708.331   3
  -2  -4  -8 7747.99 501.208   1
   2  -4   8 8526.52 706.443   4
   2  -4   8 7163.14 611.122   1
  -2  -4  -8 7469.85 627.391   4
  -2  -4  -8 7777.89 738.799   3
   2   4   9 156.278 99.0467   1
  -2  -4  -9 121.192 105.363   4
   2  -4   9 33.2411 126.027   2
   2  -4   9 29.9889 159.840   4
   2  -4   9 4.87956 96.7608   1
  -2  -4  -9-69.5646 243.221   3
   2   4   9-87.0463 207.045   3
  -2  -4  -9 129.141 74.4889   1
  -2  -4 -10 18822.5 758.736   1
   2  -4  10 18080.2 1100.37   2
   2  -4  10 18767.7 1187.60   4
   2  -4  10 17347.9 984.361   1
  -2  -4 -10 17972.9 1255.06   3
   2  -4  11 233.712 200.411   4
  -2  -4 -11 119.559 46.5875   1
   2  -4  11 167.454 90.7055   1
   2  -4  11-11.0923 136.246   2
  -2  -4 -11-222.616 267.361   3
   2  -4  12 5155.77 670.002   4
  -2  -4 -12 4718.33 679.471   3
   2  -4  12 4873.25 462.221   1
   2  -4  12 4001.28 516.980   2
   2  -4  13 4.94999 183.104   4
   2  -4  13 79.6124 88.6054   1
  -2  -4 -13 305.342 319.128   3
   2  -4  14 8508.61 938.728   4
  -2  -4 -14 8130.82 968.754   3
  -2  -4 -15 5318.53 822.751   3
   2  -4  15 4621.73 728.912   4
   2  -4  16 3930.19 708.921   4
  -2   4 -16 2892.60 652.575   3
  -2  -4 -16 3968.40 762.086   3
   2  -4  17 2530.10 639.360   4
  -2   4 -17 1141.57 430.040   3
  -2  -4 -17 1844.49 598.978   3
  -2   4 -18 692.742 465.369   3
   2  -4  18 1446.83 499.015   4
  -2  -4 -18 890.405 454.088   3
  -2  -4 -19 335.846 357.627   3
  -2   4 -19-254.375 454.359   3
   2  -5 -18 395.348 421.840   3
   2  -5 -17 8505.70 1110.12   3
   2  -5 -16 1438.22 428.690   3
   2  -5 -15 974.741 418.264   3
   2   5 -15 1330.60 301.926   1
   2  -5 -14 323.800 358.550   3
  -2  -5  14 531.473 267.407   4
   2   5 -14 196.648 148.279   1
  -2  -5  14 648.131 229.392   1
  -2  -5  13 19655.0 1266.60   4
   2  -5 -13 17213.7 1382.38   3
   2  -5 -13 17743.2 960.778   1
   2   5 -13 17549.0 1140.87   1
   2  -5 -12 15773.0 920.532   1
   2   5 -12 13591.7 1001.12   1
   2  -5 -12 16496.6 1256.20   3
  -2  -5  12 16609.8 1081.55   4
   2  -5 -11 3328.01 409.640   1
  -2  -5  11 2718.05 254.755   2
   2  -5 -11 3000.41 546.673   3
  -2  -5  11 3374.28 452.975   4
   2   5 -11 2945.74 453.626   1
  -2  -5  10 1812.32 312.674   4
   2  -5 -10 1978.17 417.021   3
   2   5 -10 1756.98 366.314   1
   2  -5 -10 1608.01 290.976   1
   2   5  -9 62134.1 2518.15   1
   2  -5  -9 61279.8 2338.22   1
  -2  -5   9 64585.1 2264.44   4
   2  -5  -9 63657.5 2582.47   3
  -2  -5   8 21916.7 1059.09   4
   2   5  -8 22317.5 1326.56   1
   2  -5  -8 22453.8 1209.74   1
  -2   5   8 22152.9 1332.10   3
   2  -5  -7 12000.2 849.566   1
  -2   5   7 12384.3 909.649   3
  -2  -5   7 12340.6 707.744   4
   2   5  -7 13406.0 960.343   1
   2  -5  -6 6564.09 621.921   1
  -2   5   6 6433.51 628.562   3
   2   5  -6 6660.35 675.577   1
  -2  -5   6 7643.40 494.940   4
  -2  -5   5 27444.2 1036.47   4
  -2   5   5 26982.1 1323.25   3
   2   5  -5 26254.6 1401.38   1
   2  -5  -5 23988.6 1298.25   1
   2   5  -4 16944.9 1073.21   1
  -2   5   4 17282.0 984.634   3
  -2  -5   4 17089.4 719.079   4
   2  -5  -4 18524.6 1077.15   1
  -2   5   3 22446.1 1130.86   3
   2  -5  -3 23114.2 1243.72   1
   2   5  -3 23893.7 1283.40   1
   2   5  -2 90763.0 3109.58   1
  -2   5   2 90878.2 2916.79   3
   2   5  -1 15752.0 999.966   1
  -2   5   0 12131.5 903.352   1
   2   5   0 12170.7 861.058   1
  -2  -5  -1 29455.0 1381.18   1
   2   5   1 30480.2 1429.49   1
  -2   5  -2 184.735 128.590   1
   2   5   2 231.607 155.972   1
  -2  -5  -2 203.418 134.773   1
  -2   5  -3 6698.93 653.881   1
   2  -5   3 5993.10 608.422   1
   2   5   3 8002.19 655.016   1
  -2  -5  -3 7495.92 629.400   1
   2   5   4 24759.3 1243.61   1
  -2  -5  -4 24142.7 1218.95   1
  -2   5  -4 23839.3 1329.94   1
   2   5   4 23115.9 1276.74   3
   2  -5   4 25329.6 1332.53   1
   2   5   5 100658. 3266.69   3
  -2  -5  -5 102047. 3091.00   1
  -2  -5  -5 100032. 2902.63   4
  -2   5  -5 97837.6 3288.79   1
   2   5   5 102138. 3136.43   1
  -2  -5  -6 28990.5 1240.04   4
   2   5   6 28454.3 1447.19   3
  -2  -5  -6 29197.8 1297.96   1
   2   5   6 29244.7 1338.14   1
  -2   5  -6 26934.3 1420.12   1
  -2  -5  -7 505.535 173.680   4
   2  -5   7 609.833 219.999   4
   2   5   7 898.710 229.625   1
   2   5   7 732.510 237.850   3
  -2  -5  -7 650.509 194.375   1
   2   5   8 548.774 247.089   3
   2   5   8 809.816 223.953   1
   2  -5   8 591.662 242.001   4
  -2  -5  -8 726.422 202.459   4
  -2  -5  -8 355.436 140.619   1
   2  -5   9 57789.2 2328.13   4
  -2  -5  -9 53834.2 1928.45   1
   2   5   9 56946.7 2055.98   1
   2  -5  10 12672.4 976.753   4
   2  -5  10 11133.9 893.143   2
  -2  -5 -10 12536.4 691.136   1
   2  -5  11 6960.10 693.321   2
   2  -5  11 7369.89 759.949   4
  -2  -5 -11 7026.15 463.040   1
  -2  -5 -11 8274.02 874.265   3
   2  -5  12 2.49639 206.697   2
  -2  -5 -12 8.47379 262.888   3
   2  -5  12 261.484 160.526   1
   2  -5  12 289.451 272.199   4
   2  -5  13 9662.46 953.456   4
   2  -5  13 8081.78 756.897   2
  -2  -5 -13 8644.96 992.290   3
   2  -5  14 522.547 218.915   2
   2  -5  14 642.695 297.116   4
  -2  -5 -14 1253.48 422.498   3
  -2  -5 -15 7223.64 968.110   3
   2  -5  15 8019.62 954.489   4
  -2  -5 -16-744.204 445.673   3
   2  -5  16 292.461 339.520   4
  -2  -5 -17 3237.20 720.361   3
   2  -5  17 4240.99 760.044   4
  -2   5 -18 756.650 472.427   3
  -2  -5 -18 1051.39 575.221   3
   2  -5  18 1207.35 464.119   4
   2  -6 -18 1117.17 498.424   3
   2  -6 -17-878.114 499.687   3
   2  -6 -16 7644.74 1029.17   3
   2   6 -15 521.810 226.950   1
   2  -6 -15 985.346 428.905   3
  -2  -6  14 8956.19 893.697   4
   2   6 -14 7728.89 804.160   1
   2  -6 -14 7659.41 942.833   3
  -2  -6  13 196.382 218.603   4
   2  -6 -13 144.715 270.028   3
  -2  -6  13 64.3677 72.1455   2
   2   6 -13 278.093 217.789   1
  -2  -6  13 100.967 126.618   1
  -2  -6  12 3480.68 515.542   1
   2  -6 -12 3255.05 454.756   1
  -2  -6  12 3529.74 497.595   4
   2  -6 -12 3279.97 603.554   3
  -2  -6  12 2601.85 277.828   2
   2   6 -12 3226.28 510.188   1
   2  -6 -11 12796.7 938.512   1
  -2  -6  11 13281.7 1031.14   1
   2   6 -11 12681.3 1050.36   1
  -2  -6  11 12668.9 916.868   4
   2  -6 -11 14629.7 1219.52   3
   2  -6 -10 5791.55 611.920   1
   2   6 -10 5141.18 654.047   1
  -2  -6  10 6475.33 601.018   4
  -2  -6  10 5754.21 667.718   1
   2  -6 -10 5473.87 680.854   3
   2   6  -9 21862.6 1387.71   1
   2  -6  -9 22767.5 1296.30   1
   2  -6  -9 23266.2 1453.24   3
  -2  -6   9 23088.9 1387.11   1
  -2  -6   9 22385.6 1151.87   4
   2   6  -8 161.179 193.534   1
   2  -6  -8 98.5811 160.476   1
   2  -6  -8-346.378 259.469   3
  -2  -6   8 36.5412 121.974   1
  -2  -6   8-121.831 127.234   4
   2   6  -7 6686.61 727.447   1
  -2  -6   7 5797.60 668.877   1
  -2   6   7 7987.72 753.648   3
   2  -6  -7 8768.15 813.656   3
  -2  -6   7 6661.00 517.863   4
   2  -6  -7 8220.70 738.949   1
   2   6  -6 35515.2 1822.97   1
  -2  -6   6 38264.9 1418.47   4
  -2   6   6 38881.4 1783.88   3
  -2  -6   6 36958.0 1806.20   1
   2  -6  -6 36075.8 1755.42   1
   2  -6  -5 7401.41 708.907   1
  -2   6   5 8147.56 718.088   3
  -2  -6   5 8314.55 507.520   4
  -2  -6   5 8496.95 771.306   1
   2   6  -5 7801.57 771.584   1
  -2   6   4 12777.6 894.682   3
   2  -6  -4 12641.6 944.219   1
   2   6  -4 11753.9 950.047   1
  -2   6   3 13544.9 905.123   3
   2   6  -3 11838.8 951.117   1
   2  -6  -3 13987.1 995.551   1
   2   6  -2 47869.0 2099.64   1
  -2   6   2 47853.2 1950.72   3
  -2   6   1 357.058 187.939   1
   2   6  -1 200.641 197.926   1
  -2   6   0 54267.3 2331.81   1
   2   6   0 55017.0 2282.48   1
  -2  -6  -1 5458.48 582.315   1
  -2   6  -1 7059.99 718.418   1
   2   6   1 5747.69 618.403   1
  -2   6  -2 58455.3 2445.54   1
  -2  -6  -2 57606.0 2292.72   1
   2   6   2 57241.2 2327.33   1
  -2   6  -3 56829.7 2432.19   1
  -2  -6  -3 58131.0 2280.37   1
   2   6   3 57082.7 2314.01   1
  -2   6  -4 22819.4 1352.14   1
   2   6   4 20734.4 1212.60   1
  -2  -6  -4 21580.7 1188.18   1
   2   6   5 5388.62 584.881   1
  -2  -6  -5 5889.72 592.162   1
  -2   6  -5 5751.37 675.887   1
   2  -6   5 5644.68 639.326   1
   2   6   5 6022.89 661.219   3
  -2  -6  -6 299.017 170.224   1
  -2  -6  -6 424.692 158.483   4
   2   6   6 287.444 171.921   1
  -2   6  -6 229.095 204.265   1
   2   6   6 187.221 128.822   3
   2  -6   6 747.701 288.513   1
  -2   6  -7 61003.8 2636.95   1
   2  -6   7 63478.1 2456.25   4
   2   6   7 69545.7 2547.21   1
  -2  -6  -7 64589.6 2339.91   4
  -2  -6  -7 66512.2 2430.71   1
   2  -6   7 65928.1 2649.58   1
   2   6   8 35766.2 1654.55   1
   2  -6   8 34241.6 1647.56   4
  -2  -6  -8 34204.2 1569.31   4
  -2  -6  -8 34514.6 1556.62   1
   2  -6   8 34071.1 1761.92   1
   2   6   9 816.578 235.452   1
  -2  -6  -9 1312.43 260.585   1
   2  -6   9 1655.97 363.947   4
   2  -6   9 1234.72 317.777   1
   2  -6  10 383.118 207.488   1
   2  -6  10 529.798 249.458   4
  -2  -6 -10 156.844 103.471   1
  -2  -6 -11 13908.7 807.382   1
   2  -6  11 15322.7 1135.17   4
   2  -6  11 14897.4 1071.94   1
   2  -6  11 14489.9 1080.66   2
   2  -6  12 14330.5 1132.90   4
   2  -6  12 12824.5 987.970   1
   2  -6  12 13090.0 1034.69   2
   2  -6  13 328.793 194.734   2
   2  -6  13-105.228 240.248   4
   2  -6  14 4029.20 655.814   4
   2  -6  14 3256.53 498.270   2
   2  -6  15 7862.19 938.267   4
   2  -6  15 4643.00 591.735   2
   2  -6  16 4943.21 813.060   4
   2  -6  17 874.370 438.568   4
   2  -7 -17 2491.76 673.528   3
   2  -7 -16 187.350 365.074   3
  -2  -7  15 2162.91 453.396   4
   2   7 -15 2160.30 434.941   1
   2  -7 -15 2229.40 616.630   3
  -2  -7  14 8069.48 843.338   4
   2   7 -14 7707.41 846.258   1
   2  -7 -14 9192.56 1074.54   3
  -2  -7  13 152.247 97.7596   2
   2   7 -13 112.447 168.634   1
   2  -7 -13-209.307 296.469   3
  -2  -7  13 364.109 237.744   4
   2  -7 -12 1811.75 477.446   3
   2   7 -12 1949.58 450.264   1
   2  -7 -12 1910.67 341.962   1
  -2  -7  12 1903.87 384.910   4
   2  -7 -11 670.980 240.686   1
   2  -7 -11 465.649 297.125   3
  -2  -7  11 772.600 268.207   4
   2   7 -11 285.548 201.352   1
  -2  -7  10 180.197 142.217   4
   2  -7 -10 112.041 126.934   1
   2   7 -10 499.597 252.718   1
   2  -7 -10 186.716 272.865   3
   2  -7  -9 2888.00 475.689   1
   2   7  -9 2304.83 502.994   1
  -2  -7   9 2424.44 482.770   1
  -2  -7   9 2311.37 349.456   4
   2  -7  -8 9874.57 870.217   1
  -2  -7   8 9009.75 878.861   1
   2   7  -8 10009.9 963.889   1
  -2  -7   8 9179.24 666.460   4
  -2  -7   7 85.3825 178.944   1
   2  -7  -7 4.20030 138.294   1
  -2  -7   7 58.4416 111.535   4
   2   7  -7-384.323 287.143   1
  -2   7   6 6391.33 682.950   3
   2   7  -6 5460.32 692.437   1
   2  -7  -6 5348.26 647.191   1
  -2  -7   6 6299.78 714.087   1
  -2  -7   6 5731.61 467.335   4
  -2  -7   5 13479.4 711.098   4
   2   7  -5 12175.5 1054.44   1
  -2   7   5 13433.5 1013.61   3
   2  -7  -5 13638.5 1054.32   1
  -2  -7   5 14341.4 1088.93   1
   2  -7  -4 44811.1 2110.85   1
  -2   7   4 46018.0 2033.57   3
   2   7  -4 42759.3 2122.38   1
  -2  -7   4 45798.1 2136.69   1
   2  -7  -3 4561.51 593.764   1
   2   7  -3 4755.50 621.943   1
  -2   7   3 3508.26 479.610   3
  -2   7   2 1487.08 355.331   1
   2  -7  -2 1107.49 346.733   1
  -2   7   2 1158.64 292.243   3
   2   7  -2 1259.06 358.137   1
  -2   7   1 2932.98 505.926   1
   2   7  -1 2694.04 475.936   1
  -2   7   0 56911.2 2589.22   1
   2   7   0 57097.5 2485.13   1
  -2  -7   0 60341.5 2480.20   1
   2   7   1 631.713 252.601   1
  -2  -7  -1 781.099 272.372   1
  -2   7  -1 566.216 304.202   1
   2   7   2 4350.39 594.569   1
  -2  -7  -2 4389.32 567.240   1
  -2   7  -2 3321.98 555.265   1
  -2  -7  -3 5085.79 596.416   1
  -2   7  -3 4090.02 600.695   1
   2   7   3 4468.92 601.433   1
   2  -7   3 4830.33 647.428   1
  -2   7  -4 69631.8 3034.41   1
   2   7   4 76626.7 3037.19   3
   2  -7   4 78281.7 3097.61   1
   2   7   4 76364.6 2960.92   1
  -2  -7  -4 76520.5 2894.88   1
   2   7   5 322.522 205.503   1
  -2   7  -5 282.937 251.291   1
   2  -7   5 108.918 158.620   1
  -2  -7  -5 137.415 121.385   1
  -2   7  -6 11230.1 1036.36   1
   2  -7   6 13080.0 1072.90   1
  -2  -7  -6 12366.2 809.466   4
  -2  -7  -6 13090.2 963.231   1
   2   7   6 13385.0 1025.21   1
  -2   7  -7 1612.28 400.612   1
  -2  -7  -7 1759.41 335.955   1
   2   7   7 1253.65 332.692   1
  -2  -7  -7 1304.21 255.969   4
   2  -7   7 2072.12 416.747   1
   2  -7   8 15464.5 1072.07   4
   2  -7   8 16099.5 1210.65   1
  -2  -7  -8 15444.6 1050.28   1
   2   7   8 17036.3 1159.94   1
   2  -7   9 4543.49 584.765   4
   2  -7   9 4131.44 597.158   1
   2   7   9 3848.79 531.911   1
  -2  -7  -9 3593.08 478.129   1
   2   7  10 11407.3 909.631   1
   2  -7  10 12023.3 981.137   4
  -2  -7 -10 10632.8 816.841   1
   2  -7  10 11213.7 985.517   1
   2  -7  11 274.047 173.961   1
  -2  -7 -11-79.4668 128.107   1
   2  -7  11 197.405 160.501   4
   2  -7  12 5850.98 742.142   2
   2  -7  12 6591.92 778.670   4
   2  -7  13-90.2005 290.360   4
   2  -7  13 271.124 178.339   2
   2  -7  14 6219.05 826.097   4
   2  -7  14 4974.24 652.399   2
   2  -7  15 283.495 266.123   4
   2  -7  16 3067.49 660.911   4
   2  -7  17-577.650 411.802   4
  -2  -8  16-75.1425 288.765   4
   2   8 -15 9306.61 987.260   1
  -2  -8  15 9121.96 960.358   4
  -2  -8  14 3433.42 553.301   4
   2   8 -14 2241.67 490.447   1
  -2  -8  13-111.725 234.207   4
   2   8 -13 245.135 234.397   1
   2   8 -12-29.1789 193.996   1
  -2  -8  12 224.427 195.697   4
  -2  -8  11 17325.9 1118.93   4
   2   8 -11 17413.0 1408.47   1
  -2  -8  10 20576.7 1179.31   4
   2   8 -10 20800.9 1529.63   1
  -2  -8   9 12743.0 852.480   4
   2   8  -9 11873.1 1160.72   1
  -2  -8   8 1773.57 306.955   4
   2   8  -8 2056.25 468.319   1
  -2  -8   7 5560.72 504.805   4
   2   8  -7 5802.78 776.527   1
   2   8  -6 20744.4 1506.97   1
  -2  -8   6 22686.9 1055.67   4
   2   8  -5 52521.5 2545.58   1
   2  -8  -5 52018.2 2444.26   1
   2   8  -4 171.926 185.979   1
   2  -8  -4 53.1017 151.350   1
  -2   8   4 132.468 179.308   3
   2   8  -3 6463.27 801.679   1
   2  -8  -3 7598.06 833.873   1
  -2   8   3 7754.81 776.959   3
   2   8  -2 30541.0 1828.54   1
  -2   8   2 32128.8 1733.97   3
   2  -8  -2 33274.7 1875.56   1
  -2   8   2 33048.3 1934.14   1
  -2   8   1 31797.3 1912.90   1
   2   8  -1 32627.2 1863.80   1
   2  -8  -1 34961.7 1912.93   1
  -2   8   0 31371.9 1912.19   1
  -2  -8   0 35107.3 1856.53   1
   2   8   0 33763.6 1875.48   1
  -2   8  -1 24989.3 1662.81   1
   2   8   1 24437.8 1566.72   1
  -2  -8  -1 26556.7 1582.42   1
  -2  -8  -2 2600.26 475.407   1
  -2   8  -2 2957.56 576.293   1
   2   8   2 3444.35 591.074   1
  -2   8  -3 67974.1 3115.81   1
   2   8   3 72202.6 3020.40   1
  -2  -8  -3 77045.0 3001.19   1
  -2   8  -4 3493.35 612.717   1
  -2  -8  -4 5757.15 671.786   1
   2   8   4 5472.35 698.047   1
   2   8   5 1989.66 444.284   1
  -2  -8  -5 2516.42 450.400   1
  -2   8  -5 2526.66 557.680   1
   2   8   6 158.135 180.236   1
  -2   8  -6 219.896 247.398   1
  -2  -8  -6 408.459 226.348   1
  -2   8  -7 34900.2 2056.24   1
   2   8   7 36045.8 1945.43   1
  -2  -8  -7 34366.3 1806.65   1
  -2  -8  -7 35932.9 1630.77   4
   2   8   8 27832.2 1652.69   1
   2  -8   8 25105.9 1434.18   4
  -2  -8  -8 24644.3 1470.16   1
  -2   8  -8 22473.9 1628.01   1
   2   8   9 4037.34 609.424   1
  -2  -8  -9 4072.07 560.564   1
   2  -8   9 3532.51 515.805   4
   2  -8  10 2304.68 433.976   4
   2   8  10 3038.05 522.425   1
   2  -8  11 6264.09 766.559   4
   2  -8  12 3642.27 613.959   4
   2  -8  13 7460.07 862.701   2
   2  -8  13 8763.85 961.988   4
   2  -8  14 952.823 374.293   4
   2  -8  15 4576.25 744.819   4
   2  -8  16 842.106 377.852   4
  -2  -9  16 1053.19 383.388   4
  -2  -9  15-205.059 293.512   4
   2   9 -15 208.308 219.167   1
   2   9 -14 1044.88 341.512   1
  -2  -9  14 1416.16 387.153   4
   2   9 -13 2745.27 565.308   1
  -2  -9  13 2900.80 488.245   4
  -2  -9  12 6329.20 689.496   4
   2   9 -12 6308.78 876.350   1
   2   9 -11 526.239 343.383   1
  -2  -9  11 447.439 240.302   4
  -2  -9  10 406.985 229.984   4
   2   9 -10 212.652 257.242   1
   2   9  -9 16535.1 1431.74   1
  -2  -9   9 16237.2 995.585   4
  -2  -9   8 2378.75 348.382   4
   2   9  -8 2149.53 502.752   1
  -2  -9   7 344.782 168.961   4
   2   9  -7 434.664 335.021   1
  -2  -9   6 3818.10 414.808   4
   2   9  -6 4014.09 680.320   1
   2   9  -5 3862.11 653.203   1
   2   9  -4 31445.0 1975.48   1
   2   9  -3 33793.1 2047.02   1
  -2   9   2 424.902 335.629   1
   2   9  -2 258.156 325.206   1
  -2   9   1 14779.8 1306.60   1
   2   9  -1 13342.2 1222.38   1
   2   9   0 6641.85 830.440   1
  -2   9   0 6870.30 874.723   1
  -2   9  -1 17483.6 1479.00   1
   2   9   1 19889.5 1471.82   1
  -2   9  -2 26396.8 1825.45   1
   2   9   2 26097.7 1710.74   1
   2   9   3 20764.1 1516.58   1
  -2   9  -3 21374.0 1618.45   1
   2   9   4 995.776 356.025   1
  -2   9  -4 1116.81 390.351   1
  -2   9  -5 12790.9 1262.58   1
   2   9   5 15036.1 1266.27   1
  -2   9  -6 9758.93 1094.39   1
   2   9   6 9883.91 1023.54   1
  -2   9  -7 314.920 272.834   1
   2   9   7-192.494 204.835   1
   2   9   8-460.764 312.147   1
   2  -9   8-239.370 184.702   4
   2  -9   9 7674.29 781.718   4
   2   9   9 8485.15 943.650   1
   2  -9  10 3622.63 571.532   4
   2   9  10 3562.65 633.077   1
   2  -9  11 730.749 313.150   4
   2  -9  12 1172.65 358.780   4
   2  -9  13 14066.2 1228.27   4
   2  -9  14 141.842 221.329   4
   2  -9  15 456.892 267.273   4
   2  -9  16-54.3010 270.586   4
  -2 -10  16 1278.64 403.976   4
   2  10 -15 1767.53 514.978   1
  -2 -10  15 1586.34 387.575   4
  -2 -10  14-554.094 313.736   4
   2  10 -14-247.788 246.064   1
   2  10 -13 976.430 450.786   1
  -2 -10  13 259.138 170.180   4
   2  10 -12 6599.89 923.256   1
  -2 -10  12 7278.37 748.069   4
  -2 -10  11 2010.98 389.471   4
   2  10 -11 1702.02 557.655   1
   2  10 -10 4500.86 820.813   1
  -2 -10  10 3595.38 483.541   4
   2  10  -9 2550.39 632.660   1
  -2 -10   9 2835.15 424.575   4
  -2 -10   8 8608.26 709.342   4
   2  10  -8 6853.40 973.335   1
  -2 -10   7 630.352 176.051   4
   2  10  -7 192.956 240.317   1
   2  10  -6 1355.65 468.837   1
  -2 -10   6 1682.80 279.232   4
   2  10  -5 16731.4 1480.35   1
   2  10  -4 10435.7 1161.36   1
   2  10  -3 4923.92 794.429   1
   2  10  -2 23228.7 1736.90   1
  -2  10   1 6529.80 930.486   1
   2  10  -1 5413.14 791.410   1
   2  10   0-332.984 298.546   1
  -2  10   0 406.438 278.552   1
  -2  10  -1 4422.21 783.145   1
   2  10   1 5753.00 828.034   1
  -2  10  -2 10617.7 1203.48   1
   2  10   2 13073.9 1260.14   1
   2  10   3 5448.10 796.860   1
  -2  10  -3 7909.46 1029.23   1
   2  10   4 855.989 390.446   1
  -2  10  -4 850.282 472.304   1
   2  10   5 587.241 363.360   1
  -2  10  -5 162.388 288.753   1
   2  10   6 5051.27 800.705   1
  -2  10  -6 4503.31 794.318   1
   2  10   7 6233.75 875.664   1
  -2  10  -7 6638.66 961.025   1
   2 -10   8 6174.45 721.511   4
   2  10   8 6837.08 934.575   1
   2  10   9 978.103 388.154   1
   2 -10   9 1421.48 373.519   4
   2 -10  10 3927.71 595.714   4
   2 -10  11 352.085 231.202   4
   2 -10  12 3072.31 559.400   4
   2 -10  13 3488.98 628.377   4
   2 -10  14 2174.88 498.186   4
   2 -10  15 733.665 333.604   4
   2  11 -14 3107.46 747.621   1
  -2 -11  13 5560.45 673.133   4
   2  11 -13 4093.36 788.429   1
   2  11 -12 2678.92 697.606   1
  -2 -11  12 2369.96 424.068   4
  -2 -11  11 156.668 161.010   4
   2  11 -11-363.353 309.915   1
  -2 -11  10-342.857 237.138   4
   2  11 -10-222.781 339.290   1
   2  11  -9 8556.87 1144.73   1
  -2 -11   9 9853.24 796.113   4
   2  11  -8 19186.3 1731.56   1
  -2 -11   8 21354.5 1195.73   4
  -2 -11   7 4726.08 507.258   4
   2  11  -7 3450.60 732.931   1
  -2 -11   6-93.4499 120.792   4
   2  11  -6-95.2718 283.582   1
   2  11  -5 2188.75 619.636   1
   2  11  -4 18833.7 1657.89   1
   2  11  -3-113.435 260.699   1
   2  11  -2 4879.28 830.853   1
   2  11  -1 665.732 384.613   1
  -2  11   0 13238.3 1393.67   1
   2  11   0 12085.0 1303.59   1
  -2  11  -1 1207.62 442.986   1
   2  11   1 1488.76 489.418   1
  -2  11  -2 6012.52 987.333   1
   2  11   2 7119.70 1007.62   1
  -2  11  -3-90.2725 307.967   1
   2  11   3 228.070 349.966   1
   2  11   4 5420.57 874.637   1
  -2  11  -4 5218.21 891.368   1
  -2  11  -5 12870.9 1421.54   1
   2  11   5 12064.5 1302.66   1
   2  11   6 10103.3 1177.31   1
  -2  11  -6 9274.38 1208.27   1
   2  11   7 5159.76 883.917   1
   2  11   8 5080.94 880.202   1
   2 -11   9 2382.73 465.994   4
   2  11   9 2687.57 611.753   1
   2 -11  10 4393.52 666.324   4
   2 -11  11 1638.34 439.320   4
   2 -11  12 489.125 313.873   4
   2 -11  13-362.732 302.265   4
   2 -11  14 11333.0 1181.63   4
   2  12 -14 315.306 275.331   1
   2  12 -13 340.247 302.939   1
   2  12 -12 2363.61 625.414   1
   2  12 -11 7214.63 1134.58   1
   2  12 -10 47.0846 332.372   1
  -2 -12   9 925.612 267.203   4
   2  12  -9 833.836 478.071   1
   2  12  -8-302.953 367.690   1
  -2 -12   8 44.0011 155.725   4
  -2 -12   7 13701.3 908.548   4
   2  12  -7 13234.1 1473.01   1
   2  12  -6-198.250 382.337   1
  -2 -12   6 348.805 169.135   4
   2  12  -5-4.33620 333.434   1
   2  12  -4-152.405 360.958   1
   2  12  -3 14128.5 1464.67   1
   2  12  -2 51.4921 242.074   1
   2  12  -1 4178.68 827.198   1
   2  12   0 398.952 300.623   1
   2  12   1 1269.93 469.337   1
  -2  12  -2 2119.66 643.489   1
   2  12   2 1615.27 484.690   1
   2  12   3 4273.46 855.368   1
  -2  12  -3 6078.80 1055.88   1
   2  12   4 542.655 289.937   1
  -2  12  -4 1410.01 488.185   1
   2  12   5 5545.60 928.113   1
   2  12   6 52.8524 260.399   1
   2  12   7 9472.18 1213.21   1
   2  12   8 1777.39 588.612   1
   2 -12   8 2234.96 469.566   4
   2  12   9 475.638 281.203   1
   2 -12   9 566.860 311.524   4
   2 -12  10 4922.82 705.645   4
   2 -12  11 6558.66 829.946   4
   2 -12  12 943.091 346.661   4
   2 -12  13 293.728 271.796   4
   2  13 -13 3538.38 864.104   1
   2  13 -12 99.9059 349.558   1
   2  13 -11 535.389 422.016   1
   2  13 -10 1470.46 555.951   1
   2  13  -9 8629.45 1291.37   1
   2  13  -8 1939.45 595.037   1
   2  13  -7 3320.93 763.601   1
   2  13  -6 5979.05 1021.80   1
   2  13  -5 7752.77 1174.21   1
   2  13  -4 7993.33 1176.50   1
   2  13  -3 6584.69 1054.95   1
   2  13  -2 3226.13 804.505   1
   2  13  -1 311.125 349.865   1
   2  13   0 11845.3 1466.37   1
   2  13   1 7412.49 1117.20   1
   2  13   2-572.400 419.463   1
   2  13   3 732.253 314.903   1
   2  13   4 6175.90 1051.29   1
   2  13   5 6014.98 1038.96   1
   2  13   6 104.829 316.241   1
   2  13   7 1984.78 562.300   1
   2 -13   8 3353.35 585.699   4
   2  13   8 3731.02 830.044   1
   2 -13   9 2730.70 503.751   4
   2 -13  10-143.659 223.883   4
   2 -13  11 952.554 369.935   4
   2  14  -9 48.1800 387.770   1
   2  14  -8 1205.81 498.020   1
   2  14  -7 1633.40 601.880   1
   2  14  -6 9627.09 1382.87   1
   2  14  -5 1064.27 504.418   1
   2  14  -4 475.247 502.094   1
   2  14  -3 6053.72 1108.39   1
   2  14  -2 25440.3 2247.67   1
   2  14  -1 9996.10 1383.60   1
   2  14   0 4292.41 926.102   1
   2  14   1-663.178 575.594   1
   2  14   2 11961.0 1525.10   1
   2  14   3 5085.36 997.985   1
   2  14   4 3728.73 862.006   1
   2  14   5 710.140 336.626   1
   2  14   6 2947.83 806.818   1
   2  14   7 194.814 321.744   1
   2 -14   8 2337.43 469.782   4
   2 -14   9 587.803 340.594   4
   2  15  -1 3211.02 952.116   1
   2  15   0-1321.82 722.952   1
   2  15   1 3915.81 929.808   1
   2  15   2-173.462 410.534   1
   2  15   3 2429.32 776.357   1
   2  15   4 257.710 308.953   1
   2  15   5 5757.00 1101.16   1
   3   0 -20-804.154 524.595   3
   3   0 -19 2875.39 783.276   3
   3   0 -18 78.7104 424.820   3
   3   0 -17 1064.60 504.709   3
   3   0 -16-301.944 336.852   3
   3   0 -15 21466.7 825.610   1
   3   0 -15 26231.0 1811.42   3
   3   0 -14-228.097 299.376   3
   3   0 -14-94.8134 88.9421   1
   3   0 -13 1478.04 221.329   1
   3   0 -12 95.0165 71.4177   2
   3   0 -12-7.30670 93.6369   1
   3   0 -11 56315.1 1886.64   1
   3   0 -11 53337.4 1648.59   2
   3   0 -11 59163.1 2231.79   4
   3   0 -10-0.47130 92.0274   4
   3   0 -10 5.19423 91.6123   1
   3   0 -10 78.2490 59.8994   2
   3   0  -9 5264.11 498.316   4
   3   0  -9 4990.27 413.041   1
   3   0  -8 186.113 120.614   4
   3   0  -8 182.536 81.6308   1
   3   0  -7 276233. 7372.37   1
   3   0  -7 289649. 7465.87   4
   3   0  -6 114.231 89.6954   1
   3   0  -5 533.424 149.027   1
   3   0  -4 68.6659 88.6228   1
   3   0  -3 125817. 3517.36   1
   3   0  -2 19.6961 68.5187   1
   3   0  -1 999999. 24442.7   1
   3   0   0 100.706 74.6528   2
   3   0   0 36.3738 65.7094   1
   3   0   1 24080.0 930.284   1
   3   0   1 24732.1 997.741   2
   3   0   2 44.1263 31.7610   3
   3   0   2 39.6809 78.4675   2
   3   0   2-2.97088 47.5734   1
   3   0   3 9233.13 438.553   3
  -3   0  -3 10319.5 470.883   3
   3   0   3 9969.96 511.713   1
   3   0   3 10404.2 635.373   2
   3   0   4 209.647 102.128   2
  -3   0  -4 8.90512 71.9240   3
  -3   0  -4 56.4318 77.5945   2
   3   0   4 38.6666 57.6208   1
   3   0   5 20241.2 773.483   1
  -3   0  -5 19398.5 851.878   3
  -3   0  -5 19698.8 997.755   2
   3   0   5 20185.5 1016.98   2
  -3   0  -6-67.1281 97.1095   2
  -3   0  -6 97.6047 104.362   3
   3   0   6 62.7508 62.7894   1
  -3   0  -7 60560.5 2095.33   3
   3   0   7 60446.4 1722.23   1
  -3   0  -7 61447.3 2231.80   2
   3   0   8 29.4950 30.4784   1
  -3   0  -8-48.2864 150.600   3
   3   0   8 95.0563 43.9416   1
  -3   0  -9 21489.3 1194.89   4
   3   0   9 22012.2 1237.46   4
  -3   0  -9 21934.3 1167.29   3
   3   0  10-167.564 159.278   4
  -3   0 -10-176.214 205.600   3
  -3   0 -11 37577.6 1822.29   3
   3   0  11 41444.8 1961.47   4
   3   0  12 46.7094 189.201   4
  -3   0 -12 159.044 188.144   3
  -3   0 -13 1586.35 405.799   3
   3   0  13 2126.22 465.456   4
   3   0  14-42.2103 284.265   4
  -3   0 -14 115.703 277.051   3
  -3   0 -15 2575.78 552.429   3
  -3   0 -16-408.921 375.263   3
  -3   0 -17 12204.2 1263.32   3
  -3   0 -18-37.5859 301.999   3
  -3   0 -19 1051.04 530.167   3
   3  -1 -20-215.034 472.437   3
   3   1 -20 624.046 394.472   3
   3   1 -19 406.711 456.322   3
   3  -1 -19 411.414 477.534   3
   3  -1 -18 2837.22 685.463   3
   3   1 -18 2355.29 633.994   3
   3   1 -17 1418.60 560.431   3
   3  -1 -17 1318.63 444.329   3
   3  -1 -16 226.004 306.931   3
   3  -1 -15 11093.5 1121.30   3
   3   1 -15 9705.05 549.050   1
   3  -1 -15 8577.80 414.021   1
   3  -1 -14 944.525 155.422   1
   3   1 -14 847.914 187.981   1
   3  -1 -14 1171.36 215.931   2
   3  -1 -14 577.936 275.593   3
   3  -1 -13 2593.27 528.392   3
   3   1 -13 2551.06 306.383   1
   3  -1 -13 2070.12 251.411   1
   3  -1 -13 2374.91 277.280   2
   3  -1 -12 1571.96 224.564   1
   3  -1 -12 1239.94 389.392   3
   3   1 -12 1599.54 256.036   1
   3  -1 -12 1294.39 208.733   2
   3  -1 -11 4103.76 373.760   1
   3   1 -11 4818.75 514.066   4
   3  -1 -11 3915.88 579.810   3
   3   1 -11 3600.95 371.659   1
   3  -1 -10 62562.9 2073.07   1
   3  -1 -10 66084.8 2382.80   4
   3   1 -10 66106.0 2322.54   4
   3   1 -10 61788.7 2141.26   1
   3   1  -9 11288.2 694.358   1
   3   1  -9 12170.7 768.372   4
   3  -1  -9 12263.4 814.445   4
   3  -1  -9 12639.8 699.223   1
   3  -1  -8 25812.7 1086.78   1
   3   1  -8 24879.5 1108.95   1
   3   1  -8 26733.7 1154.66   4
  -3  -1   8 24238.1 1071.75   1
   3  -1  -7 1076.24 187.966   1
   3   1  -7 931.299 179.787   4
   3   1  -7 422.250 140.502   1
  -3  -1   7 607.429 148.729   1
   3   1  -6 7915.77 534.001   1
   3   1  -6 9114.18 532.110   4
  -3  -1   6 8325.12 542.015   1
  -3  -1   5 57196.0 1929.93   1
   3   1  -5 59269.9 1958.04   1
   3   1  -5 62508.7 1854.31   4
   3   1  -4 99534.9 2921.86   1
   3   1  -3 37392.5 1336.03   1
   3   1  -3 35804.1 1092.96   2
   3   1  -2 257533. 6646.26   1
   3   1  -2 253640. 6427.15   2
   3   1  -1 5230.14 389.580   1
   3   1  -1 4880.32 330.056   2
   3   1   0 122492. 3408.30   1
   3   1   0 122820. 3373.69   2
  -3  -1  -1 647.900 124.822   1
   3   1   1 617.183 96.0265   4
   3   1   1 706.691 129.817   1
  -3  -1  -2 13900.6 640.298   1
   3   1   2 13263.3 634.217   1
   3   1   2 13043.6 589.135   3
   3   1   3 44502.6 1433.39   1
   3   1   3 44075.9 1431.45   3
  -3  -1  -3 46222.2 1445.40   1
  -3   1  -3 42655.6 1263.29   3
   3  -1   3 46679.9 1648.79   2
   3   1   4 33383.3 1183.39   1
  -3  -1  -4 37250.2 1324.14   3
  -3  -1  -4 36088.6 1301.57   4
   3  -1   4 39623.3 1493.13   2
  -3   1  -4 36286.2 1157.33   3
   3   1   4 35966.6 1279.88   3
   3  -1   5 6965.93 569.927   2
  -3  -1  -5 7674.47 512.073   4
  -3  -1  -5 8224.98 601.175   2
   3   1   5 7410.11 403.486   1
  -3   1  -5 6433.49 423.637   3
   3   1   5 7649.36 511.467   3
  -3  -1  -5 6991.45 512.569   3
   3  -1   6 1103.24 164.113   1
  -3  -1  -6 1285.82 228.066   3
  -3  -1  -6 1064.47 242.742   2
  -3  -1  -6 1452.28 223.228   4
  -3   1  -6 1223.80 208.158   3
   3   1   6 1333.12 159.802   1
   3  -1   6 1303.32 277.190   2
  -3  -1  -7 40385.7 1582.00   4
  -3  -1  -7 39480.0 1605.44   3
   3  -1   7 38970.8 1326.07   1
   3  -1   7 40250.8 1667.01   2
  -3   1  -7 39364.6 1495.40   3
   3   1   7 38169.4 1206.26   1
  -3  -1  -7 40490.2 1697.34   2
  -3   1  -8 54718.1 1890.14   3
  -3  -1  -8 52713.1 1943.97   4
  -3  -1  -8 51989.5 1960.02   3
   3   1   8 44713.5 1335.19   1
   3  -1   8 50511.8 1527.57   1
   3  -1   8 52885.1 2009.11   2
  -3  -1  -8 51765.9 2040.52   2
   3  -1   9 35457.0 1109.27   1
   3  -1   9 33629.8 1118.54   1
  -3   1  -9 35044.2 1549.15   3
   3  -1   9 37400.7 1703.32   4
   3   1   9 40735.3 1743.36   4
  -3  -1  -9 38962.6 1696.03   3
  -3  -1  -9 38355.2 1728.91   2
  -3  -1  -9 39025.1 1667.48   4
  -3  -1 -10 4402.00 553.646   2
  -3  -1 -10 4477.96 536.363   3
   3   1  10 4487.68 566.009   4
   3  -1  10 4403.90 556.972   4
  -3   1 -10 4114.08 511.431   3
  -3   1 -11 9337.99 806.875   3
   3  -1  11 9471.98 863.166   4
  -3  -1 -11 10244.7 869.871   3
  -3  -1 -11 10555.6 886.054   2
   3   1  11 10515.8 914.985   4
   3   1  12 14612.0 1132.74   4
   3  -1  12 14326.6 1113.38   4
  -3   1 -12 12362.4 994.795   3
  -3  -1 -12 12923.1 1049.84   3
   3  -1  13 12973.4 1112.98   4
  -3  -1 -13 12479.3 1075.29   3
  -3   1 -13 10757.2 975.450   3
  -3  -1 -14 2406.85 524.292   3
  -3   1 -14 2969.28 566.030   3
   3  -1  14 3593.02 607.590   4
  -3   1 -15 2498.90 543.647   3
   3  -1  15 3283.63 616.122   4
  -3  -1 -15 1340.73 403.882   3
  -3   1 -16 2324.04 563.927   3
  -3  -1 -16 1872.06 499.601   3
  -3   1 -17 4909.79 776.484   3
  -3  -1 -17 2819.62 583.451   3
  -3   1 -18 531.902 341.854   3
  -3  -1 -18 344.250 377.393   3
  -3   1 -19 254.286 303.755   3
  -3  -1 -19-143.970 369.771   3
   3   2 -20 3670.86 891.295   3
   3   2 -19 2161.34 670.977   3
   3  -2 -19 1883.16 639.503   3
   3  -2 -18 259.017 358.290   3
   3   2 -18 839.430 449.038   3
   3  -2 -17 394.301 334.572   3
   3  -2 -16 8018.00 1013.95   3
   3  -2 -15 456.163 87.7377   1
   3  -2 -15 528.030 346.389   3
   3   2 -15 393.817 136.882   1
   3  -2 -14 2824.02 573.737   3
   3  -2 -14 2799.92 301.778   1
   3   2 -14 2915.61 351.885   1
   3  -2 -14 2646.84 340.721   2
   3  -2 -14 2344.77 248.050   1
   3  -2 -13 10745.1 676.927   1
   3  -2 -13 11528.5 1069.11   3
   3   2 -13 11352.1 737.141   1
   3  -2 -13 10319.1 594.912   1
   3   2 -12 47602.2 1842.88   1
   3  -2 -12 50150.9 1708.06   1
   3  -2 -12 47643.0 2288.54   3
   3  -2 -11 258.072 120.380   1
   3   2 -11 66.6439 99.7617   1
   3  -2 -11-4.86087 229.509   3
  -3  -2  11 71.9008 81.5038   1
   3   2 -11 402.346 158.849   4
   3  -2 -10 2550.14 382.074   4
   3  -2 -10 2685.44 424.837   3
   3   2 -10 3003.09 367.258   4
  -3  -2  10 2856.69 353.739   1
   3   2 -10 2636.77 340.570   1
   3  -2 -10 2614.44 299.365   1
  -3  -2   9 25114.0 1181.25   1
   3   2  -9 27787.0 1225.31   4
   3   2  -9 28128.4 1256.49   1
   3   2  -8 18402.6 962.617   1
   3   2  -8 19068.6 913.302   4
  -3  -2   8 17836.7 927.374   1
   3   2  -7 5129.67 402.406   4
  -3  -2   7 5345.17 455.075   1
   3   2  -7 5037.59 462.061   1
   3   2  -6 26174.3 1002.51   4
   3   2  -6 26883.4 1189.17   1
  -3  -2   6 26899.1 1163.17   1
   3   2  -5 2371.56 216.267   4
  -3  -2   5 2356.38 286.141   1
   3   2  -5 2306.91 296.821   1
   3   2  -4 18277.7 900.623   1
   3   2  -4 18201.7 658.359   4
  -3  -2   4 17825.7 620.421   2
   3   2  -3 16838.8 830.833   1
   3   2  -3 16099.0 544.673   4
   3   2  -2 4496.68 397.569   1
   3  -2  -2 4789.27 327.878   3
   3   2  -1 19402.3 871.296   1
   3  -2  -1 16688.8 645.299   3
  -3   2   1 18012.5 653.534   3
  -3   2   0 56700.2 1547.62   3
   3   2   0 56884.0 1864.82   1
   3   2   0 57574.5 1495.60   4
  -3  -2  -1 4604.08 363.368   1
   3   2   1 4427.82 362.788   1
   3   2   1 4383.23 241.914   4
   3   2   2 144889. 3959.47   1
  -3  -2  -2 142919. 3936.81   1
  -3  -2  -2 146498. 3762.61   4
   3   2   2 140706. 3748.41   4
   3   2   3 28553.5 1033.53   4
  -3  -2  -3 28114.3 1026.38   4
   3   2   3 29245.8 1142.46   3
  -3  -2  -3 29586.9 1103.64   1
   3   2   3 29165.5 1110.05   1
   3   2   4 145.486 77.2841   4
  -3  -2  -4 42.9729 54.5313   4
   3   2   4 62.9527 72.0298   1
   3   2   4 76.3471 91.8881   3
  -3  -2  -4 104.976 57.5228   1
   3  -2   5 96508.2 2992.43   1
  -3  -2  -5 102433. 2990.07   4
   3   2   5 102225. 2870.45   1
   3   2   5 98643.0 2982.46   4
  -3  -2  -5 98514.0 2840.74   1
   3   2   5 99577.2 3048.09   3
  -3  -2  -5 105065. 3137.02   3
  -3  -2  -5 102670. 3199.43   2
  -3  -2  -6 206686. 5701.92   4
   3  -2   6 200141. 5611.81   1
  -3  -2  -6 216917. 5872.18   3
   3  -2   6 201968. 5860.60   2
   3   2   6 210583. 5788.29   3
  -3  -2  -6 210677. 5411.71   1
   3   2   6 210543. 5457.64   1
  -3  -2  -6 214720. 5946.97   2
  -3  -2  -7 196.339 129.661   4
   3  -2   7 58.5133 122.092   2
   3  -2   7 62.4481 86.7991   1
   3   2   7-21.6240 122.929   3
  -3  -2  -7 40.9990 154.571   3
  -3  -2  -7 71.7304 119.500   2
   3   2   7 93.3191 69.6807   1
   3  -2   8 4992.58 404.397   1
   3   2   8 6068.67 580.282   4
  -3  -2  -8 5593.40 540.702   4
  -3  -2  -8 5421.30 568.713   3
  -3  -2  -8 5939.70 600.882   2
   3   2   8 5519.04 327.076   1
   3  -2   8 5120.65 535.087   2
  -3  -2  -9 9783.01 810.039   2
   3  -2   9 8532.26 756.815   4
  -3  -2  -9 10247.2 817.863   3
  -3  -2  -9 10569.8 779.541   4
   3   2   9 10014.7 791.216   4
   3  -2   9 9784.30 771.067   2
   3  -2   9 8748.03 535.879   1
   3  -2  10 2690.09 258.163   1
  -3  -2 -10 2685.13 421.377   2
  -3   2 -10 2755.82 414.006   3
  -3  -2 -10 2332.22 416.441   3
   3  -2  10 2442.69 414.669   4
   3  -2  10 2274.95 404.170   2
  -3   2 -11 2647.47 412.230   3
  -3  -2 -11 2477.10 440.182   2
   3  -2  11 1776.74 374.992   4
  -3  -2 -11 2159.86 402.354   3
   3  -2  11 1833.64 184.294   1
  -3  -2 -12 11634.4 1009.89   3
   3  -2  12 11259.7 992.948   4
  -3   2 -12 10372.1 901.040   3
  -3  -2 -13 6273.95 773.672   3
   3  -2  13 5114.41 702.459   4
  -3   2 -13 4950.77 652.448   3
  -3   2 -14 5137.91 708.789   3
   3  -2  14 6422.21 811.362   4
  -3  -2 -14 6643.19 822.705   3
   3  -2  15 6016.68 805.921   4
  -3  -2 -15 4410.53 696.475   3
  -3   2 -15 4185.19 693.865   3
  -3  -2 -16 5769.78 886.327   3
  -3   2 -16 6239.32 865.715   3
   3  -2  16 8065.39 1031.32   4
  -3   2 -17 766.037 446.702   3
  -3  -2 -17 438.005 294.316   3
   3  -2  17 667.049 364.841   4
  -3  -2 -18 2060.98 608.676   3
  -3   2 -18 1526.03 534.282   3
  -3  -2 -19 1373.97 561.029   3
  -3   2 -19-507.766 532.136   3
   3   3 -20 418.483 502.881   3
   3  -3 -19 8136.33 1174.24   3
   3  -3 -18 787.680 510.315   3
   3  -3 -17 3531.07 694.600   3
   3  -3 -16 171.830 297.085   3
   3  -3 -15 14663.6 665.846   1
   3  -3 -15 18633.7 1496.90   3
   3   3 -15 17884.6 971.898   1
   3  -3 -14 3923.17 377.507   1
   3   3 -14 2999.89 388.731   1
   3  -3 -14 3566.24 325.112   1
   3  -3 -14 3953.49 642.584   3
   3   3 -13 17416.7 1021.70   1
   3  -3 -13 17217.8 929.256   1
   3  -3 -13 15990.2 1281.98   3
  -3  -3  13 17951.1 997.323   1
   3  -3 -13 16491.2 832.506   1
  -3  -3  12 4660.34 479.482   1
   3  -3 -12 4253.99 446.512   1
   3   3 -12 3773.90 459.797   1
   3  -3 -12 3523.05 553.121   3
   3  -3 -12 3784.86 373.297   1
   3   3 -11 3466.70 442.018   1
  -3  -3  11 3018.92 389.633   1
   3   3 -11 2926.38 390.848   4
   3  -3 -11 3687.65 565.315   3
   3  -3 -11 3307.57 401.497   1
   3  -3 -10 9726.43 699.725   1
   3   3 -10 7488.19 648.096   1
   3   3 -10 8017.03 626.860   4
  -3  -3  10 8089.92 648.864   1
   3  -3 -10 9062.88 817.108   3
   3   3  -9 39644.4 1542.13   4
   3   3  -9 38243.9 1658.97   1
  -3  -3   9 39423.6 1635.68   1
   3   3  -8 7763.20 534.094   4
  -3  -3   8 7718.31 608.043   1
   3   3  -8 7608.01 624.993   1
  -3  -3   7 378.339 151.694   1
   3   3  -7 141.218 113.502   1
   3   3  -7 151.933 90.5734   4
   3   3  -6 7710.89 455.301   4
  -3  -3   6 7877.91 602.167   1
   3   3  -6 7781.19 630.252   1
   3   3  -5 56282.5 2029.43   1
  -3  -3   5 54883.0 1975.61   1
   3   3  -5 56165.6 1659.96   4
   3   3  -4 61688.0 1748.68   4
  -3   3   4 67696.7 2126.98   3
   3   3  -4 63823.2 2202.43   1
  -3   3   3 6831.77 467.738   3
   3  -3  -3 6132.72 461.959   3
   3   3  -3 6673.62 543.479   1
  -3   3   2 1270.88 195.800   3
   3  -3  -2 1054.70 186.619   3
   3   3  -2 755.993 204.539   1
  -3   3   1 55497.1 1684.96   3
   3   3  -1 52901.5 1906.44   1
  -3  -3   0 17292.8 523.267   4
  -3   3   0 17635.8 694.473   3
   3   3   0 17573.1 894.231   1
  -3  -3  -1 55456.2 1515.58   4
  -3  -3  -1 52482.3 1863.14   1
   3   3   1 53826.0 1889.59   1
  -3  -3  -2 364.189 89.0968   4
   3   3   2 371.120 124.392   1
  -3  -3  -2 429.835 122.444   1
  -3  -3  -3 3300.37 273.756   4
   3  -3   3 3745.00 403.397   1
   3   3   3 3138.67 352.624   3
  -3  -3  -3 3335.74 331.314   1
   3   3   3 3190.46 345.325   1
   3  -3   4 17264.1 942.754   1
  -3  -3  -4 16929.5 813.499   1
   3   3   4 17179.7 931.055   3
   3   3   4 18146.1 871.617   1
  -3  -3  -4 17394.5 788.147   4
   3   3   5 2158.91 271.564   1
  -3  -3  -5 2198.67 264.555   1
  -3  -3  -5 1768.67 241.111   4
   3  -3   5 1971.89 302.070   1
   3   3   5 2229.68 314.075   3
  -3  -3  -6 1609.36 259.276   4
   3   3   6 1835.14 314.302   3
   3  -3   6 1640.31 274.379   1
  -3  -3  -6 1768.63 226.989   1
   3   3   6 1996.70 261.309   1
   3   3   7 5321.00 550.949   3
   3  -3   7 5566.45 559.725   2
   3  -3   7 4895.07 462.982   1
  -3  -3  -7 5812.87 507.026   4
   3   3   7 5937.16 430.186   1
  -3  -3  -7 5281.09 382.664   1
  -3  -3  -7 5934.74 585.944   3
   3  -3   8 4773.03 456.197   1
   3  -3   8 5540.72 586.422   2
  -3  -3  -8 6146.89 394.919   1
  -3  -3  -8 6072.99 556.184   4
   3   3   8 6089.54 413.647   1
   3  -3   8 5817.15 595.725   4
  -3  -3  -8 6905.42 668.984   3
   3   3   8 6245.30 618.480   3
  -3  -3  -8 5347.15 595.519   2
   3   3   9 52992.8 1667.61   1
  -3  -3  -9 56980.6 2194.64   4
   3  -3   9 55429.2 2255.80   4
  -3  -3  -9 57682.4 2354.94   3
   3  -3   9 53255.1 1936.67   1
  -3  -3  -9 58392.8 2358.97   2
   3  -3   9 52420.2 2191.48   2
   3  -3  10 3352.13 490.818   4
  -3  -3 -10 2883.47 496.502   3
   3  -3  10 2867.85 341.268   1
   3  -3  10 3420.35 479.045   2
  -3  -3 -11 7804.92 809.906   3
   3  -3  11 6950.02 747.912   4
   3  -3  11 6460.29 480.145   1
   3  -3  11 6388.02 671.233   2
   3  -3  12 11546.3 619.589   1
   3  -3  12 11446.9 1016.03   4
  -3  -3 -12 11569.8 1033.56   3
   3  -3  13 14347.7 1152.93   4
   3  -3  13 9211.60 449.857   1
  -3  -3 -13 12403.0 1113.70   3
  -3   3 -13 10710.5 994.577   3
   3  -3  14-80.0414 221.823   4
  -3   3 -14 122.790 301.239   3
  -3  -3 -14-51.5913 340.999   3
  -3  -3 -15 5271.89 804.465   3
   3  -3  15 6304.80 856.270   4
  -3   3 -15 4270.35 685.849   3
   3  -3  16 1003.27 398.070   4
  -3   3 -16 1456.35 474.888   3
  -3  -3 -16 1400.72 513.169   3
  -3   3 -17 982.558 439.752   3
   3  -3  17 1699.73 547.071   4
  -3  -3 -17 581.729 396.764   3
   3  -3  18 3257.16 724.165   4
  -3   3 -18 3256.81 684.817   3
  -3  -3 -18 2202.81 640.235   3
  -3   3 -19 225.297 334.840   3
  -3  -3 -19 132.453 506.635   3
   3  -4 -19-260.622 347.656   3
   3  -4 -18 832.676 455.805   3
   3  -4 -17 734.702 412.038   3
   3  -4 -16 1985.26 551.405   3
   3   4 -15 404.078 195.831   1
   3  -4 -15 517.539 379.583   3
   3  -4 -15 413.854 123.612   1
   3  -4 -14 7718.20 595.647   1
   3  -4 -14 7283.50 922.800   3
   3  -4 -14 7451.00 531.320   1
   3   4 -14 7762.75 703.296   1
   3   4 -13 4361.31 536.648   1
   3  -4 -13 4799.20 499.170   1
   3  -4 -13 4024.75 644.711   3
   3  -4 -13 4396.94 409.806   1
   3  -4 -12-26.2329 210.167   3
   3   4 -12 48.7322 123.434   1
   3  -4 -12 314.161 174.750   1
   3   4 -11 2249.63 336.222   4
   3  -4 -11 2728.97 486.628   3
   3  -4 -11 2267.70 347.529   1
   3   4 -11 2575.70 415.795   1
   3   4 -10 3772.48 423.879   4
   3  -4 -10 3469.16 532.727   3
   3  -4 -10 3349.55 435.586   1
   3   4 -10 3537.67 486.195   1
   3   4  -9 24219.2 1133.11   4
   3  -4  -9 24938.6 1286.65   1
  -3  -4   9 25480.1 1199.12   4
   3  -4  -9 26418.7 1442.24   3
   3   4  -9 25312.8 1354.43   1
   3  -4  -8 8803.64 710.733   1
  -3  -4   8 8968.25 606.365   4
   3   4  -8 8961.85 742.197   1
   3  -4  -7 36906.2 1603.16   1
   3   4  -7 37724.3 1623.75   1
  -3  -4   7 40462.7 1349.42   4
  -3  -4   6 1985.34 320.018   1
  -3  -4   6 2232.80 240.482   4
   3   4  -6 2628.48 389.560   1
   3  -4  -6 1895.71 327.966   1
  -3   4   6 1888.00 311.636   3
   3  -4  -5 21418.9 1178.26   1
  -3  -4   5 23051.2 1190.32   1
  -3   4   5 24684.4 1173.80   3
  -3  -4   5 22096.3 836.353   4
   3   4  -5 22152.6 1189.75   1
   3  -4  -4 1090.41 246.261   1
   3   4  -4 1700.44 301.033   1
  -3  -4   4 1390.28 141.861   4
  -3   4   4 1105.85 235.810   3
   3  -4  -4 1006.79 220.227   3
  -3   4   3 141177. 3793.75   3
   3  -4  -3 128925. 3991.06   1
   3  -4  -3 139358. 3787.69   3
   3   4  -3 131637. 3940.28   1
  -3  -4   3 123045. 3236.51   4
  -3   4   2 407.692 127.340   3
   3   4  -2 584.028 195.654   1
   3   4  -1 14810.1 891.795   1
  -3   4   1 14778.5 744.628   3
   3   4   0 9891.39 703.417   1
  -3  -4   0 9720.92 366.085   4
  -3  -4  -1 97001.7 3084.53   1
  -3  -4  -1 96647.0 2570.38   4
   3   4   1 97416.8 3096.69   1
  -3  -4  -2 4023.05 430.329   1
   3   4   2 3869.98 426.069   1
  -3  -4  -2 4235.57 287.964   4
   3   4   3 535.881 167.939   1
   3  -4   3 138.963 94.6042   1
  -3  -4  -3 461.515 117.798   4
  -3  -4  -3 569.059 165.148   1
  -3  -4  -4 5814.30 493.784   1
   3  -4   4 5048.09 535.553   1
   3   4   4 6520.01 580.422   3
   3   4   4 5887.69 528.017   1
  -3  -4  -4 5808.38 424.631   4
   3  -4   5 40730.7 1745.02   1
  -3  -4  -5 40577.1 1567.81   1
   3   4   5 45213.0 1696.25   1
  -3  -4  -5 40143.0 1517.30   4
   3   4   5 40859.0 1751.32   3
   3  -4   6 7634.30 663.564   1
  -3  -4  -6 6892.14 522.532   1
   3   4   6 7584.59 588.925   1
  -3  -4  -6 7505.31 564.153   4
   3   4   6 8221.16 698.881   3
   3  -4   7 595.270 249.215   4
   3   4   7 777.424 244.385   3
  -3  -4  -7 754.706 189.331   4
   3   4   7 593.425 164.217   1
   3  -4   7 447.486 161.137   1
  -3  -4  -7 679.321 166.389   1
   3  -4   8 7338.41 675.995   4
  -3  -4  -8 6703.82 480.976   1
   3  -4   8 7135.58 622.799   1
   3   4   8 5907.25 643.082   3
   3   4   8 6652.81 520.887   1
  -3  -4  -8 6877.99 600.694   4
   3  -4   9 43213.9 1835.33   1
   3   4   9 47793.4 1660.81   1
   3  -4   9 45017.8 2013.74   2
   3   4   9 45641.3 2102.51   3
  -3  -4  -9 45168.1 1561.43   1
  -3  -4  -9 46941.9 1946.31   4
   3  -4   9 49187.4 2106.06   4
   3  -4  10 7083.12 729.382   2
   3   4  10 5817.01 421.430   1
  -3  -4 -10 5919.04 389.551   1
   3  -4  10 5795.81 550.192   1
  -3  -4 -10 6372.89 731.573   3
   3  -4  10 6336.37 683.761   4
   3  -4  11 24556.2 1205.64   1
  -3  -4 -11 25992.6 1608.48   3
   3  -4  11 22180.7 1356.88   2
   3  -4  11 24642.4 1490.76   4
   3  -4  12 6736.05 780.978   4
   3  -4  12 6466.53 539.750   1
  -3  -4 -12 6033.32 794.243   3
   3  -4  12 5301.41 643.621   2
   3  -4  13 863.990 359.212   4
   3  -4  13 534.522 204.611   2
  -3  -4 -13 1062.65 399.380   3
   3  -4  14 4357.83 708.594   4
  -3  -4 -14 3646.88 683.213   3
  -3   4 -15 20768.7 1566.34   3
   3  -4  15 24305.7 1699.81   4
  -3  -4 -15 22204.5 1727.26   3
   3  -4  16 1607.35 501.621   4
  -3  -4 -16 2258.07 592.286   3
  -3   4 -16 517.851 354.041   3
  -3   4 -17-133.660 397.302   3
  -3  -4 -17 173.237 411.089   3
   3  -4  17 811.209 410.817   4
  -3   4 -18 615.289 358.775   3
  -3  -4 -18 205.896 346.985   3
   3  -5 -18 5856.67 1024.70   3
   3  -5 -17 8217.31 1119.54   3
   3  -5 -16-501.481 354.207   3
   3  -5 -15 334.944 321.940   3
   3   5 -15 221.703 137.135   1
   3  -5 -14 3865.34 688.549   3
  -3  -5  14 4849.49 585.274   1
   3   5 -14 3372.63 479.651   1
   3  -5 -13 4052.26 479.336   1
  -3  -5  13 5127.90 602.259   1
   3  -5 -13 4032.77 642.421   3
   3   5 -13 4481.40 580.800   1
   3  -5 -12 4609.11 537.187   1
  -3  -5  12 3956.39 528.968   1
   3  -5 -12 3940.23 636.941   3
   3   5 -12 4193.85 561.686   1
   3  -5 -11 9110.87 763.717   1
  -3  -5  11 10329.6 796.888   4
   3   5 -11 9246.57 844.860   1
  -3  -5  11 9359.19 820.867   1
   3  -5 -11 8153.84 877.960   3
   3   5 -10 25422.2 1460.42   1
   3  -5 -10 26725.8 1406.86   1
  -3  -5  10 23470.9 1367.62   1
   3  -5 -10 26142.9 1531.40   3
  -3  -5  10 26315.9 1280.44   4
   3  -5  -9 14519.3 1081.25   3
   3   5  -9 13541.4 1035.03   1
  -3  -5   9 14356.2 837.191   4
  -3  -5   9 13022.4 974.265   1
   3  -5  -9 13554.8 957.988   1
   3   5  -8 12406.2 956.211   1
  -3  -5   8 11818.8 905.962   1
   3  -5  -8 11380.1 884.782   1
   3  -5  -8 10646.7 888.819   3
  -3  -5   8 13090.7 734.817   4
  -3   5   7 2811.03 442.699   3
  -3  -5   7 3242.91 320.146   4
   3  -5  -7 2511.24 399.979   1
   3  -5  -7 2604.05 435.235   3
   3   5  -7 3071.92 460.314   1
  -3  -5   6 32017.8 1182.60   4
   3  -5  -6 33997.0 1624.24   1
  -3   5   6 34616.3 1594.63   3
   3   5  -6 32727.2 1628.10   1
  -3  -5   5 10274.8 516.223   4
   3  -5  -5 12140.3 889.008   1
  -3   5   5 11323.0 796.343   3
   3   5  -5 10000.7 816.598   1
   3   5  -4 109090. 3734.28   1
   3  -5  -4 115461. 3786.27   1
  -3   5   4 121638. 3616.46   3
  -3  -5   4 113777. 3029.99   4
  -3   5   3 36905.7 1523.69   3
   3  -5  -3 36967.4 1708.74   1
   3   5  -3 34739.1 1639.11   1
  -3  -5   3 35447.5 1058.46   4
   3   5  -2 751.046 247.855   1
  -3   5   2 333.637 144.411   3
  -3   5   1 20948.0 1014.59   3
   3   5  -1 18901.1 1136.47   1
   3   5   0 95761.4 3237.32   1
   3   5   1 2372.59 368.966   1
  -3  -5  -1 2135.31 356.974   1
  -3  -5  -2 715.814 129.470   4
   3   5   2 522.279 184.853   1
  -3  -5  -2 294.654 151.723   1
  -3  -5  -3 5341.70 389.758   4
  -3  -5  -3 6140.27 582.283   1
   3   5   3 5606.14 575.873   1
  -3  -5  -4 54078.8 1836.10   4
   3   5   4 55128.6 2237.18   3
   3   5   4 57484.9 2192.54   1
  -3  -5  -4 56328.2 2125.73   1
  -3  -5  -5 11962.9 800.646   1
   3   5   5 12053.3 836.701   1
   3   5   5 10956.5 858.297   3
  -3  -5  -5 11842.7 701.225   4
  -3  -5  -6 6727.55 578.820   1
   3   5   6 6775.59 611.117   1
  -3  -5  -6 7100.46 557.404   4
   3   5   6 6656.35 674.281   3
  -3  -5  -7 2877.09 366.070   1
   3   5   7 2748.27 434.754   3
  -3  -5  -7 3073.78 391.494   4
   3   5   7 2765.19 389.328   1
   3  -5   7 2443.57 387.204   4
   3  -5   8 25227.2 1372.38   4
  -3  -5  -8 22931.6 1118.05   1
   3   5   8 25856.4 1241.62   1
  -3  -5  -8 24082.0 1245.62   4
   3  -5   9 94.6108 165.630   4
   3   5   9 123.781 119.130   1
  -3  -5  -9 185.633 126.335   1
   3  -5  10 1426.27 339.328   2
   3  -5  10 1381.56 359.135   4
   3   5  10 1628.87 260.629   1
  -3  -5 -10 1577.35 230.165   1
   3  -5  11 135.772 191.564   2
   3  -5  11 795.334 273.538   4
  -3  -5 -11 774.044 152.454   1
   3  -5  12 25742.9 1547.11   2
   3  -5  12 27101.1 1641.72   4
   3  -5  13 1327.44 368.608   4
   3  -5  13 1427.70 368.723   2
   3  -5  14 4763.20 715.110   4
   3  -5  14 3226.57 555.774   2
   3  -5  15 497.689 328.790   4
   3  -5  16 3258.60 650.162   4
  -3   5 -16 3369.28 715.165   3
  -3   5 -17 1150.30 482.453   3
   3  -5  17 2352.27 624.819   4
   3  -6 -18 1359.13 577.776   3
   3  -6 -17 843.194 448.074   3
   3  -6 -16 7080.94 998.020   3
   3   6 -15 2485.70 446.115   1
   3  -6 -15 2412.43 607.042   3
   3   6 -14-41.2975 181.060   1
   3  -6 -14 153.480 307.336   3
   3   6 -13 372.431 182.626   1
  -3  -6  13-54.6640 162.899   1
   3  -6 -13 109.700 347.732   3
   3  -6 -13 96.9779 152.068   1
  -3  -6  12 4077.10 554.076   1
  -3  -6  12 4579.82 558.686   4
   3   6 -12 4547.76 624.301   1
   3  -6 -12 4384.52 563.267   1
   3  -6 -12 5321.64 765.803   3
  -3  -6  12 2682.10 196.508   2
   3  -6 -11 10663.9 895.390   1
   3  -6 -11 10176.4 1003.25   3
  -3  -6  11 10252.3 793.805   4
  -3  -6  11 10016.7 898.391   1
   3   6 -11 10240.6 948.930   1
  -3  -6  10 5210.01 641.555   1
   3  -6 -10 5148.24 617.200   1
  -3  -6  10 4777.27 493.808   4
   3   6 -10 4865.00 653.238   1
   3  -6 -10 5153.11 696.093   3
  -3  -6   9 129.145 138.533   1
   3  -6  -9-19.0827 184.092   1
   3  -6  -9 20.0709 203.093   3
   3   6  -9 96.5888 216.014   1
  -3  -6   9 18.1395 111.019   4
  -3  -6   8 7738.12 563.408   4
  -3  -6   8 7579.27 761.702   1
   3  -6  -8 8659.25 791.877   1
   3   6  -8 7764.76 813.978   1
   3  -6  -8 8937.21 837.546   3
  -3  -6   7 18815.5 1239.64   1
   3  -6  -7 18496.7 1218.10   1
   3   6  -7 18765.4 1279.33   1
  -3   6   7 19733.3 1246.47   3
   3  -6  -7 19618.0 1245.15   3
  -3  -6   7 19586.5 898.444   4
  -3  -6   6 4323.11 353.515   4
  -3   6   6 3804.42 509.325   3
  -3  -6   6 4241.95 559.494   1
   3  -6  -6 3943.49 531.586   1
   3   6  -6 4225.17 583.785   1
  -3   6   5 4693.32 531.963   3
   3  -6  -5 4009.08 537.190   1
  -3  -6   5 3669.23 506.982   1
   3   6  -5 3816.67 561.296   1
  -3  -6   5 3442.28 292.935   4
   3  -6  -4 31746.5 1649.65   1
  -3  -6   4 30151.2 1030.62   4
   3   6  -4 30773.9 1643.67   1
  -3   6   4 32611.5 1519.71   3
   3  -6  -3 79046.7 3037.54   1
   3   6  -3 79598.5 3035.76   1
  -3   6   3 85175.2 2855.21   3
   3   6  -2 20200.4 1263.08   1
  -3   6   2 19588.6 1099.99   3
  -3   6   1 33916.6 1513.06   3
   3   6  -1 33364.1 1703.01   1
   3   6   0 932.982 274.937   1
   3   6   1 11285.4 898.286   1
  -3  -6  -1 10767.8 858.817   1
   3   6   2 53461.0 2256.99   1
  -3  -6  -2 54618.8 2238.93   1
   3  -6   3 17422.1 1185.36   1
  -3  -6  -3 16411.3 800.167   4
  -3  -6  -3 17060.3 1097.35   1
   3   6   3 17018.7 1130.01   1
   3   6   4 9490.38 857.964   3
  -3  -6  -4 9169.30 591.604   4
   3  -6   4 9689.27 866.006   1
   3   6   4 10695.7 850.750   1
  -3  -6  -4 9105.37 769.363   1
   3  -6   5 429.578 198.879   1
  -3  -6  -5 544.774 154.992   4
   3   6   5 547.741 189.759   1
  -3  -6  -5 500.120 180.945   1
   3   6   5 1186.14 300.378   3
   3   6   6 8881.72 770.491   1
  -3  -6  -6 9756.53 676.880   4
   3  -6   6 7314.21 758.153   1
   3   6   6 7739.53 789.388   3
  -3  -6  -6 8938.31 740.877   1
  -3  -6  -7 24687.5 1272.47   1
  -3  -6  -7 22633.7 1191.31   4
   3  -6   7 25230.3 1470.38   1
   3   6   7 25285.5 1367.29   1
   3  -6   8 212.768 170.834   4
  -3  -6  -8-18.3378 115.438   4
   3  -6   8-77.4986 129.029   1
   3   6   8-76.3928 138.450   1
  -3  -6  -8 22.6137 106.532   1
   3   6   9 90.0033 163.822   1
  -3  -6  -9 265.909 142.473   1
   3  -6   9 487.020 250.539   4
   3  -6   9 390.502 189.285   1
   3  -6  10 21935.4 1368.10   1
   3   6  10 24216.3 1260.32   1
   3  -6  10 22623.6 1422.62   4
  -3  -6 -10 21313.1 1081.69   1
   3  -6  11 19024.2 1232.94   1
  -3  -6 -11 17057.9 901.691   1
   3  -6  11 19192.8 1326.64   4
   3  -6  11 17495.3 1266.77   2
   3  -6  12 2291.85 493.770   4
   3  -6  12 2004.30 459.768   2
   3  -6  12 2515.41 429.506   1
   3  -6  13 455.272 187.897   2
   3  -6  13 49.3854 225.004   4
   3  -6  14 6001.28 819.550   4
   3  -6  14 6220.03 735.385   2
   3  -6  15 1426.07 481.882   4
   3  -6  15 321.511 221.733   2
   3  -6  16 906.482 437.604   4
   3  -6  17 1856.65 543.466   4
  -3   6 -17 2172.07 679.009   3
   3  -7 -17 562.851 383.003   3
   3  -7 -16-181.201 319.343   3
   3   7 -15 6254.71 776.970   1
   3  -7 -15 6880.89 984.940   3
   3  -7 -14 2397.72 549.707   3
   3   7 -14 2218.56 473.577   1
  -3  -7  13 5964.35 676.609   4
   3   7 -13 5406.88 742.453   1
   3  -7 -13 4013.25 721.115   3
   3   7 -12 163.833 182.819   1
  -3  -7  12 80.4849 144.434   4
   3  -7 -12 100.429 256.721   3
   3   7 -11 11081.2 1054.52   1
   3  -7 -11 11922.7 1016.80   1
  -3  -7  11 11817.4 848.305   4
   3  -7 -11 12898.0 1163.55   3
   3  -7 -10 15062.9 1155.94   1
  -3  -7  10 16095.2 957.776   4
   3  -7 -10 15531.7 1249.58   3
   3   7 -10 13364.6 1169.96   1
   3  -7  -9 785.504 281.773   1
   3  -7  -9 374.140 282.130   3
   3   7  -9 468.738 241.961   1
  -3  -7   9 266.074 151.103   4
  -3  -7   8 9372.18 631.640   4
   3   7  -8 9695.78 972.351   1
   3  -7  -8 9116.77 870.550   1
  -3  -7   7 11826.9 683.484   4
   3  -7  -7 13198.0 1061.17   1
   3   7  -7 11427.5 1050.76   1
  -3  -7   7 12241.0 1047.64   1
   3  -7  -6 5443.99 654.991   1
  -3  -7   6 4696.21 631.145   1
  -3   7   6 5137.84 618.904   3
  -3  -7   6 5051.60 396.073   4
   3   7  -6 4863.77 698.255   1
  -3   7   5 46736.6 2051.56   3
   3  -7  -5 43359.5 2126.62   1
  -3  -7   5 44418.3 2137.65   1
   3   7  -5 41579.0 2131.79   1
  -3  -7   5 44167.6 1476.44   4
  -3   7   4 390.072 183.467   3
   3  -7  -4 829.325 274.913   1
  -3  -7   4 662.935 273.438   1
  -3  -7   4 428.218 112.089   4
   3   7  -4 407.212 254.621   1
   3  -7  -3 24728.2 1520.44   1
   3   7  -3 23371.1 1499.14   1
  -3   7   3 26762.2 1402.14   3
   3  -7  -2 364.905 201.059   1
  -3   7   2 297.701 167.820   3
   3   7  -2 52.0265 169.130   1
   3   7  -1 56889.9 2548.26   1
  -3   7   1 61847.3 2387.26   3
   3   7   0 1726.96 410.976   1
  -3  -7   0 2467.41 439.210   1
  -3  -7  -1 780.470 247.229   1
   3   7   1 328.837 189.024   1
   3   7   2-131.254 205.512   1
  -3  -7  -2 12.3469 174.752   1
   3  -7   2 152.735 138.650   1
   3   7   3 44140.4 2121.08   1
  -3  -7  -3 46665.2 2121.01   1
   3  -7   3 47242.1 2242.02   1
   3  -7   4 1396.22 382.377   1
  -3  -7  -4 1097.75 206.424   4
  -3  -7  -4 1573.56 361.206   1
   3   7   4 1261.90 346.506   1
   3  -7   5 21771.0 1451.11   1
   3   7   5 24099.3 1457.62   1
  -3  -7  -5 23048.8 1108.93   4
  -3  -7  -5 24259.0 1406.60   1
   3   7   6 13514.9 1047.28   1
  -3  -7  -6 12585.6 807.019   4
   3  -7   6 10875.1 1003.06   1
  -3  -7  -6 13579.6 986.031   1
   3   7   7 41466.4 2003.11   1
  -3  -7  -7 41794.9 1755.09   4
   3  -7   7 41915.0 2143.35   1
  -3  -7  -7 41103.2 1897.67   1
   3  -7   8 6774.54 716.154   4
   3   7   8 7134.80 736.626   1
   3  -7   8 7195.45 809.010   1
  -3  -7  -8 5683.47 616.077   1
  -3  -7  -9 14412.1 968.692   1
   3  -7   9 14104.7 1080.98   4
   3   7   9 14335.0 1058.99   1
   3  -7   9 13833.9 1140.53   1
   3  -7  10 8911.55 878.166   4
   3   7  10 9431.79 825.262   1
  -3  -7 -10 8065.31 687.145   1
   3  -7  10 8373.77 862.241   1
   3   7  11 9725.53 812.168   1
   3  -7  11 9844.48 960.372   4
   3  -7  12 598.250 292.919   2
   3  -7  12 645.208 293.276   4
   3  -7  13 16820.6 1346.21   4
   3  -7  13 15279.7 1282.86   2
   3  -7  14 336.530 282.900   2
   3  -7  14-44.5362 209.305   4
   3  -7  15 116.380 309.758   4
   3  -7  16 166.439 309.837   4
   3  -8 -16 10457.3 1299.69   3
   3   8 -15 2848.84 543.615   1
   3  -8 -15 2992.36 699.342   3
   3   8 -14 366.945 204.329   1
  -3  -8  14 377.803 180.899   4
  -3  -8  13 834.688 293.147   4
   3   8 -13 303.139 258.365   1
   3  -8 -13 1251.19 473.954   3
  -3  -8  12 17339.3 1128.71   4
   3   8 -12 16149.5 1370.49   1
  -3  -8  11 17044.5 1055.37   4
   3   8 -11 15796.8 1340.98   1
  -3  -8  10 881.465 233.344   4
   3   8 -10 1124.04 404.004   1
   3   8  -9 6940.97 889.020   1
  -3  -8   9 7480.07 609.837   4
  -3  -8   8 41089.1 1589.31   4
   3   8  -8 37416.2 2188.72   1
  -3  -8   7 1764.42 255.427   4
   3   8  -7 1782.90 426.833   1
  -3  -8   6 14929.4 768.211   4
   3   8  -6 14581.5 1247.16   1
   3   8  -5 13544.2 1181.41   1
  -3  -8   5 13152.3 670.668   4
   3   8  -4 33744.8 1955.54   1
  -3   8   4 35931.3 1822.29   3
  -3   8   3 2383.63 433.105   3
   3   8  -3 2129.03 481.328   1
   3   8  -2 16733.0 1304.83   1
  -3   8   2 19468.6 1239.97   3
  -3   8   1 1451.12 353.913   3
   3   8  -1 1345.64 377.642   1
   3   8   0 1718.39 424.026   1
   3   8   1 1856.20 417.309   1
   3   8   2 7616.90 837.873   1
   3   8   3 25076.0 1605.49   1
  -3  -8  -3 25874.9 1564.25   1
   3   8   4 386.382 190.897   1
  -3  -8  -4-49.3341 151.779   1
  -3  -8  -5-4.56585 162.254   1
  -3  -8  -5 151.196 106.024   4
  -3  -8  -6 21246.9 1140.11   4
  -3  -8  -6 22382.8 1409.77   1
   3   8   6 24315.4 1548.50   1
   3   8   7 10433.7 986.134   1
  -3  -8  -7 9471.05 748.877   4
  -3  -8  -7 11004.2 945.230   1
   3   8   8 543.607 199.926   1
  -3  -8  -8 733.166 240.639   1
   3  -8   9 138.002 224.331   4
   3   8   9 211.475 203.415   1
  -3  -8  -9 10.6187 135.617   1
   3   8  10 2784.86 497.082   1
   3  -8  10 2661.05 510.803   4
   3   8  11 641.883 257.130   1
   3  -8  11-53.7242 214.601   4
   3  -8  12 4336.62 663.822   4
   3  -8  13 1221.55 407.359   2
   3  -8  13 1871.47 467.354   4
   3  -8  14 2252.65 513.743   2
   3  -8  14 3161.97 604.167   4
   3  -8  15 1810.76 458.290   4
   3  -8  16 1541.74 463.174   4
   3   9 -15 438.986 263.344   1
  -3  -9  14 6127.21 731.315   4
   3   9 -14 5300.85 821.736   1
  -3  -9  13 1330.82 345.836   4
   3   9 -13 674.645 312.909   1
   3   9 -12-1.14367 203.047   1
  -3  -9  12-357.476 235.857   4
  -3  -9  11 171.046 167.073   4
   3   9 -11 91.7315 234.249   1
   3   9 -10 24040.3 1828.27   1
  -3  -9  10 28573.2 1380.52   4
  -3  -9   9 8315.05 661.400   4
   3   9  -9 8455.86 1024.87   1
  -3  -9   8 88.6395 129.576   4
   3   9  -8-221.851 349.181   1
   3   9  -7 1305.32 433.971   1
  -3  -9   7 1798.26 253.050   4
  -3  -9   6 53517.8 1823.25   4
   3   9  -6 46244.6 2555.26   1
  -3  -9   5 3944.89 358.284   4
   3   9  -5 3215.37 596.979   1
   3   9  -4 3057.70 606.233   1
   3   9  -3 1488.13 462.409   1
   3   9  -2 7325.05 887.591   1
  -3   9   1 29.6177 160.992   3
   3   9  -1 21.9572 216.916   1
   3   9   0 16389.3 1331.85   1
   3   9   1 11275.9 1108.82   1
   3   9   2 28847.5 1837.63   1
   3   9   3 9200.83 992.663   1
   3   9   4 7542.34 904.222   1
  -3  -9  -5 1069.83 232.511   4
   3   9   5 728.223 281.297   1
  -3  -9  -6 315.963 126.654   4
   3   9   6 361.565 274.199   1
   3   9   7 2640.47 555.484   1
   3   9   8 12654.3 1156.35   1
   3  -9   9 1086.23 352.373   4
   3   9   9 981.030 338.121   1
   3  -9  10 188.937 233.373   4
   3   9  10 427.327 249.100   1
   3   9  11 835.467 266.411   1
   3  -9  11 921.354 335.671   4
   3  -9  12 16263.9 1342.27   4
   3  -9  13 676.652 366.383   2
   3  -9  13 33.3813 215.061   4
   3  -9  14-388.357 361.906   4
   3  -9  15 2742.35 576.280   4
   3  10 -15 362.436 290.028   1
   3  10 -14 521.030 355.590   1
  -3 -10  14 1090.18 347.928   4
  -3 -10  13 5151.64 627.461   4
   3  10 -13 4914.95 830.954   1
  -3 -10  12 1451.79 355.293   4
   3  10 -12 1126.76 441.242   1
   3  10 -11 2860.16 670.758   1
  -3 -10  11 2775.90 433.753   4
  -3 -10  10 7321.89 658.609   4
   3  10 -10 8378.70 1061.32   1
  -3 -10   9 11032.1 772.544   4
   3  10  -9 8586.27 1092.64   1
  -3 -10   8 1351.70 254.692   4
   3  10  -8 731.804 372.370   1
  -3 -10   7 10267.3 685.239   4
   3  10  -7 9307.77 1126.02   1
  -3 -10   6 1962.24 280.841   4
   3  10  -6 1631.75 487.320   1
   3  10  -5 14037.2 1350.25   1
  -3 -10   5 13787.8 756.509   4
   3  10  -4 23.6305 263.440   1
   3  10  -3 26280.6 1862.10   1
   3  10  -2-126.134 252.669   1
   3  10  -1 58.7343 262.586   1
   3  10   0 183.273 264.288   1
   3  10   1 39113.5 2311.30   1
   3  10   2 23208.4 1740.40   1
   3  10   3 1355.14 431.580   1
   3  10   4 149.545 214.448   1
  -3 -10  -5 14719.0 950.537   4
   3  10   5 16430.8 1429.03   1
   3  10   6 8206.16 1007.20   1
   3  10   7 1698.81 499.232   1
   3  10   8-156.164 229.132   1
   3  10   9 11922.0 1220.97   1
   3 -10   9 12352.0 1073.36   4
   3 -10  10 258.683 222.022   4
   3  10  10 339.894 289.215   1
   3 -10  11 14823.9 1273.98   4
   3 -10  12 153.465 244.935   4
   3 -10  13 2503.37 565.450   4
   3 -10  14 652.253 348.399   4
   3  11 -15 4238.49 800.707   1
   3  11 -14 307.707 243.590   1
   3  11 -13 11078.6 1337.19   1
   3  11 -12 354.150 378.824   1
   3  11 -11 127.019 293.661   1
  -3 -11  11 273.849 180.271   4
  -3 -11  10 2681.95 405.069   4
   3  11 -10 3111.47 726.188   1
  -3 -11   9 13484.5 880.319   4
   3  11  -9 12430.1 1390.16   1
   3  11  -8 2904.78 716.977   1
  -3 -11   8 1607.12 293.765   4
   3  11  -7 4093.78 795.475   1
  -3 -11   7 4321.06 442.018   4
  -3 -11   6 2112.70 298.218   4
   3  11  -6 2163.96 605.384   1
  -3 -11   5 20459.8 987.513   4
   3  11  -5 20015.6 1733.32   1
   3  11  -4 28848.5 2073.78   1
   3  11  -3 1248.72 461.023   1
   3  11  -2 888.750 397.410   1
   3  11  -1 9102.69 1131.31   1
   3  11   0 3080.07 670.132   1
   3  11   1 7009.84 990.339   1
   3  11   2 569.440 346.185   1
   3  11   3 15919.7 1480.01   1
   3  11   4 5070.27 862.064   1
   3  11   5 16082.4 1489.56   1
   3  11   6 2396.74 615.792   1
   3  11   7 2198.50 539.349   1
   3  11   8 1790.12 547.260   1
   3 -11   9 5654.69 737.336   4
   3  11   9 7069.35 978.132   1
   3  11  10 782.607 340.627   1
   3 -11  10 309.566 261.952   4
   3 -11  11 444.746 300.301   4
   3 -11  12 163.058 240.062   4
   3 -11  13 2177.47 533.723   4
   3  12 -14 662.566 349.568   1
   3  12 -13-395.220 402.868   1
   3  12 -12 2960.96 737.381   1
   3  12 -11 616.196 385.028   1
   3  12 -10-381.560 331.699   1
   3  12  -9 785.457 341.326   1
   3  12  -8 5728.35 1005.72   1
   3  12  -7-273.712 429.638   1
   3  12  -6 8056.28 1171.91   1
  -3 -12   5 1288.96 247.125   4
   3  12  -5 1104.14 402.533   1
   3  12  -4 3095.18 718.108   1
   3  12  -3 863.031 457.166   1
   3  12  -2 5355.21 924.665   1
   3  12  -1 3230.45 729.771   1
   3  12   0 19905.2 1781.13   1
   3  12   1 630.322 376.839   1
   3  12   2 22548.8 1893.67   1
   3  12   3 1583.47 572.528   1
   3  12   4 1270.99 545.446   1
   3  12   5 2469.26 664.631   1
   3  12   6 23917.0 1987.81   1
   3  12   7 1056.57 497.459   1
   3  12   8 183.460 266.075   1
   3  12   9 799.422 510.248   1
   3 -12   9 135.848 235.558   4
   3  12  10 15558.3 1557.90   1
   3 -12  10 13784.3 1226.09   4
   3 -12  11 94.8511 228.783   4
   3 -12  12 1432.01 442.829   4
   3  13 -12 292.999 400.263   1
   3  13 -11 255.998 372.324   1
   3  13 -10 1175.73 474.939   1
   3  13  -9 1461.38 575.964   1
   3  13  -8 3706.45 840.102   1
   3  13  -7 4187.83 900.239   1
   3  13  -6-165.907 338.262   1
   3  13  -5 6706.56 1095.54   1
   3  13  -4 5342.97 999.037   1
   3  13  -3 331.272 381.892   1
   3  13  -2 2311.17 663.692   1
   3  13  -1 8450.45 1211.09   1
   3  13   0 9923.55 1274.03   1
   3  13   1 1471.39 557.623   1
   3  13   2 12.5058 316.458   1
   3  13   3 8539.72 1257.42   1
   3  13   4 1692.76 621.383   1
   3  13   5 1393.11 583.778   1
   3  13   6 916.000 460.605   1
   3  13   7 8943.94 1259.62   1
   3  13   8 6496.28 1121.77   1
   3 -13   9 3956.58 652.074   4
   3  13   9 3276.68 764.102   1
   3 -13  10 245.069 232.879   4
   3 -13  11 150.189 266.414   4
   3  14  -8-37.5989 393.447   1
   3  14  -7 9220.84 1365.79   1
   3  14  -6 2191.93 611.295   1
   3  14  -5 2064.73 660.976   1
   3  14  -4-14.0486 335.907   1
   3  14  -3 12942.9 1579.79   1
   3  14  -2-166.363 394.505   1
   3  14  -1-44.8798 398.372   1
   3  14   0 462.543 373.079   1
   3  14   1 8876.29 1294.39   1
   3  14   2 4753.03 1002.70   1
   3  14   3 2238.45 690.379   1
   3  14   4 2412.32 613.624   1
   3  14   5 1275.82 506.686   1
   3  14   6-168.572 387.242   1
   3  14   7 4746.04 978.040   1
   3 -14   8 1699.14 463.806   4
   3  14   8 1247.75 542.488   1
   3  14   9 563.484 505.414   1
   4   0 -20 6318.32 1088.28   3
   4   0 -19-395.647 430.672   3
   4   0 -18 1139.90 471.831   3
   4   0 -17-297.256 378.816   3
   4   0 -16 520.071 282.395   3
   4   0 -15-281.930 302.992   3
   4   0 -15-88.7723 114.027   1
   4   0 -14 130.941 104.948   1
   4   0 -13 260.659 142.472   1
   4   0 -12 25020.0 1190.83   1
   4   0 -11-23.6737 33.7887   2
   4   0 -11 86.8460 91.1741   1
   4   0 -10 2974.47 366.440   1
   4   0 -10 3124.82 412.975   4
   4   0  -9 33.2148 100.559   1
   4   0  -9 99.2093 121.990   4
   4   0  -8 6396.46 524.214   1
   4   0  -7-67.4868 97.5176   1
   4   0  -6 1507.54 249.785   1
   4   0  -5 195.345 116.743   1
   4   0  -4 111020. 3325.07   1
   4   0  -3 34.7284 90.0204   1
   4   0  -2 599340. 15027.9   1
   4   0  -1 194.287 104.288   2
   4   0  -1 121.984 131.079   1
   4   0   0 283215. 7428.03   1
   4   0   0 286794. 7444.98   2
   4   0   1 118.070 105.804   2
   4   0   1 15.6886 77.7185   1
   4   0   2 16942.4 798.271   1
   4   0   2 15133.2 574.964   3
   4   0   2 17452.8 903.444   2
   4   0   3 52.4968 60.4743   3
   4   0   3-23.1881 68.6616   1
   4   0   3-51.1149 123.282   2
   4   0   4 636.649 149.208   1
  -4   0  -4 438.454 130.467   3
   4   0   4 588.870 192.021   2
   4   0   5-10.7174 80.8199   1
  -4   0  -5 29.8026 92.2096   3
   4   0   5 96.0648 114.577   2
   4   0   6 11323.0 597.178   1
  -4   0  -6 11418.4 678.185   3
   4   0   6 11797.3 822.791   2
   4   0   7 27.6043 64.9289   1
  -4   0  -7 121.600 140.881   3
   4   0   8 493.738 221.437   4
  -4   0  -8 462.778 194.119   3
   4   0   8 509.934 103.624   1
   4   0   9-42.1317 51.9272   1
   4   0   9-121.910 190.030   4
  -4   0  -9 35.4640 183.742   3
   4   0   9-22.6122 44.3852   1
  -4   0 -10 23191.6 1310.89   3
   4   0  10 24355.8 1403.73   4
   4   0  11-158.100 237.088   4
  -4   0 -11-31.0982 180.638   3
   4   0  12 567.243 253.766   4
  -4   0 -12 656.508 283.771   3
   4   0  13 58.3426 221.379   4
  -4   0 -13 36.5582 235.677   3
   4   0  14 5895.34 807.824   4
  -4   0 -14 4443.51 672.527   3
   4   0  15 469.114 318.617   4
  -4   0 -15 20.1066 246.848   3
  -4   0 -16-344.805 346.991   3
  -4   0 -17-67.3774 309.504   3
  -4   0 -18 8142.89 1095.94   3
  -4   0 -19-576.315 417.227   3
   4   1 -20 1315.42 570.550   3
   4  -1 -20 1559.18 666.670   3
   4   1 -19 1380.00 551.588   3
   4  -1 -19 1515.73 618.781   3
   4   1 -18 530.014 420.789   3
   4  -1 -18 490.451 422.274   3
   4   1 -17 765.606 452.256   3
   4  -1 -17 118.241 367.989   3
   4   1 -16 6112.74 493.423   1
   4  -1 -16 5568.70 843.542   3
   4  -1 -15 3295.40 651.030   3
   4   1 -15 3398.19 371.740   1
   4  -1 -15 3549.75 355.476   1
   4  -1 -14 1792.74 492.423   3
   4   1 -14 1468.91 264.174   1
   4  -1 -14 1765.41 266.579   1
   4  -1 -14 1628.34 221.663   2
   4  -1 -13 597.907 317.430   3
   4  -1 -13 451.857 166.537   1
   4   1 -13 314.021 146.547   1
   4  -1 -13 844.093 163.527   2
   4  -1 -12 6317.36 536.480   1
   4  -1 -12 5796.06 749.886   3
   4   1 -12 6198.98 558.191   1
   4   1 -11 15739.6 934.483   1
   4  -1 -11 14736.8 864.126   1
   4   1 -11 16103.0 985.289   4
   4   1 -10 1783.39 294.594   4
   4  -1 -10 1474.54 259.495   1
   4  -1 -10 1822.59 311.618   4
   4   1 -10 1521.98 279.723   1
   4  -1  -9 6304.71 530.958   1
   4   1  -9 5339.34 511.891   1
   4   1  -9 5794.62 508.277   4
   4  -1  -8 5400.64 479.170   1
   4   1  -8 4088.70 406.988   4
   4   1  -8 4371.39 438.686   1
  -4  -1   7 37602.0 1514.82   1
   4   1  -7 39718.9 1473.11   4
   4   1  -7 38903.4 1557.23   1
   4  -1  -7 38480.2 1524.04   1
  -4  -1   6 30469.9 1295.60   1
   4   1  -6 31720.9 1344.20   1
   4  -1  -6 31918.9 1321.13   1
  -4  -1   5 34842.9 1400.35   1
   4   1  -5 36879.9 1466.62   1
   4   1  -5 34669.2 1069.39   2
   4   1  -4 4511.36 430.638   1
   4   1  -4 5077.70 315.368   2
   4   1  -3 11431.0 695.270   1
   4   1  -3 11133.5 544.458   2
   4   1  -2 202630. 5495.05   1
   4   1  -2 199317. 5278.46   2
   4   1  -1 687.036 172.253   1
   4   1  -1 713.952 159.535   2
   4   1   0 1509.34 236.944   1
   4   1   0 1595.86 234.036   2
  -4  -1  -1 14453.7 760.481   1
   4   1   1 15974.6 798.872   1
   4   1   1 15672.0 814.783   2
   4   1   2 96216.3 2698.27   4
   4   1   2 95950.7 2857.65   1
  -4  -1  -2 94088.9 2818.28   1
   4   1   2 95236.6 2965.58   2
   4   1   3 117520. 3139.57   3
   4   1   3 122329. 3226.17   4
   4   1   3 117815. 3260.35   1
   4  -1   3 123731. 3521.99   2
   4   1   4 26472.8 1071.72   4
  -4   1  -4 22346.8 833.841   3
   4   1   4 24318.4 1011.21   1
   4  -1   4 23912.6 1192.27   2
   4   1   4 24968.2 995.183   3
   4   1   5 14074.3 750.166   3
   4   1   5 13275.6 680.770   1
  -4   1  -5 14582.4 664.204   3
   4   1   5 13311.0 770.188   4
   4  -1   5 15187.1 933.300   2
  -4  -1  -5 13530.3 871.546   2
   4   1   6 27621.0 1077.90   1
  -4  -1  -6 31406.1 1314.19   3
   4  -1   6 31391.2 1470.45   2
  -4  -1  -6 29204.3 1418.09   2
  -4   1  -6 29777.9 1150.98   3
   4   1   7 19025.4 1054.73   4
   4   1   7 18676.1 798.206   1
  -4  -1  -7 19813.1 1045.40   3
   4  -1   7 20400.2 1172.31   2
  -4  -1  -7 19382.8 1148.76   2
  -4   1  -7 19565.0 933.783   3
   4  -1   8 16123.3 781.448   1
   4  -1   8 19439.3 1121.57   4
   4   1   8 17877.5 1064.58   4
  -4   1  -8 16531.5 920.629   3
  -4  -1  -8 18206.3 1043.46   3
   4  -1   8 18185.7 777.193   1
   4  -1   8 17590.1 1108.35   2
   4   1   8 17200.4 727.674   1
  -4  -1  -8 16785.8 1101.36   2
  -4  -1  -9 2219.77 396.341   2
   4   1   9 1919.60 180.961   1
  -4  -1  -9 2354.18 385.741   3
   4   1   9 1965.06 359.999   4
   4  -1   9 2315.42 241.685   1
  -4   1  -9 1827.97 319.222   3
   4  -1   9 2393.34 406.557   4
   4  -1   9 2703.32 249.854   1
   4  -1  10 19897.3 1241.65   4
   4   1  10 21063.6 1269.89   4
  -4  -1 -10 19638.2 1216.41   3
   4  -1  10 18624.1 734.147   1
  -4  -1 -10 20175.0 1287.14   2
  -4   1 -10 19192.9 1131.23   3
   4  -1  10 18326.2 713.754   1
  -4   1 -11 31726.5 1623.96   3
  -4  -1 -11 34762.7 1769.74   3
   4  -1  11 36232.3 1860.12   4
   4   1  11 37313.0 1862.69   4
   4  -1  12 21772.8 1442.89   4
  -4  -1 -12 23210.7 1438.73   3
   4   1  12 24316.5 1513.60   4
   4  -1  13 5055.17 706.679   4
   4   1  13 4253.85 656.982   4
  -4   1 -13 4103.22 592.782   3
  -4  -1 -13 3431.82 586.946   3
   4  -1  14 378.084 285.064   4
  -4   1 -14 375.095 268.371   3
  -4  -1 -14 171.287 247.197   3
  -4   1 -15 4126.88 658.973   3
   4  -1  15 5730.42 833.342   4
  -4  -1 -15 4048.56 683.012   3
  -4  -1 -16 12468.6 1242.25   3
  -4   1 -16 11854.0 1162.02   3
  -4  -1 -17 3007.59 645.979   3
  -4   1 -17 3513.06 692.257   3
  -4  -1 -18 174.165 316.150   3
  -4   1 -18 2197.60 656.935   3
  -4  -1 -19 663.555 455.568   3
   4   2 -20 942.885 642.304   3
   4   2 -19 777.453 476.484   3
   4  -2 -19 634.932 568.691   3
   4  -2 -18 665.575 504.188   3
   4  -2 -17 6443.18 943.856   3
   4  -2 -16 147.684 301.931   3
   4   2 -16 584.198 169.465   1
   4  -2 -15 2427.85 286.199   1
   4  -2 -15 2285.19 575.224   3
   4   2 -15 2555.49 368.022   1
   4  -2 -14 15780.2 858.093   1
   4  -2 -14 16642.3 1356.68   3
   4   2 -14 17114.0 1003.63   1
   4  -2 -13 37412.9 2079.72   3
   4   2 -13 38936.7 1687.96   1
   4  -2 -13 40734.8 1588.77   1
   4   2 -12 736.677 219.739   1
   4  -2 -12 421.681 302.385   3
   4  -2 -12 541.810 157.743   1
   4   2 -11 3023.81 407.785   1
   4  -2 -11 2791.22 512.820   3
   4  -2 -11 3470.78 399.542   1
   4   2 -11 3924.31 447.987   4
  -4  -2  11 3168.98 395.835   1
   4   2 -10 2081.23 313.407   4
   4   2 -10 1896.13 335.192   1
   4  -2 -10 1987.48 411.446   3
  -4  -2  10 1937.43 310.876   1
   4  -2 -10 1649.48 269.482   1
  -4  -2   9 1897.86 301.115   1
   4   2  -9 2033.74 297.682   4
   4  -2  -9 2249.95 317.890   1
   4   2  -9 1879.54 328.885   1
  -4  -2   8 149.207 110.358   1
   4   2  -8 30.4404 68.8966   4
   4   2  -8 243.772 162.264   1
   4   2  -7 28527.5 1316.85   1
  -4  -2   7 28309.0 1298.50   1
   4   2  -7 28865.9 1133.15   4
  -4  -2   6 54348.8 1972.35   1
   4   2  -6 53875.1 2008.04   1
   4   2  -6 52982.3 1703.38   4
   4   2  -5 16595.8 933.971   1
   4   2  -5 17739.6 714.470   4
   4  -2  -5 17496.3 895.778   3
   4   2  -4 44032.1 1673.53   1
  -4  -2   4 43030.1 1341.20   2
   4  -2  -4 41232.9 1508.65   3
   4   2  -3 8743.77 613.360   1
   4  -2  -3 7648.93 476.156   3
  -4  -2   3 7945.28 456.860   2
   4   2  -2 3030.17 355.002   1
   4  -2  -2 2555.55 241.593   3
  -4  -2   2 3184.96 290.508   2
   4   2  -1 21820.7 1030.07   1
   4  -2  -1 22796.6 783.184   3
   4   2   0 10583.5 418.575   4
   4   2   0 10285.3 648.405   1
   4   2   1 62653.7 2114.68   1
   4   2   1 66789.9 1829.74   4
  -4  -2  -1 60221.6 2093.12   1
   4   2   2 17836.1 713.176   4
   4   2   2 17124.6 854.297   1
  -4  -2  -2 16718.0 845.152   1
  -4  -2  -3 7104.13 504.177   1
   4   2   3 6943.94 503.688   1
   4   2   3 7315.29 510.955   3
   4   2   3 7131.62 446.834   4
  -4  -2  -4 5030.83 399.279   4
   4   2   4 4871.97 408.225   1
  -4  -2  -4 4610.13 400.801   1
   4   2   4 4721.07 387.440   4
   4   2   4 4741.79 423.573   3
   4   2   5 135617. 3745.09   3
   4  -2   5 135930. 3985.03   2
   4   2   5 136371. 3623.02   1
  -4  -2  -5 140125. 3604.00   1
  -4  -2  -5 140599. 3684.13   4
   4   2   6 2280.65 324.177   3
   4  -2   6 2825.85 403.846   2
  -4  -2  -6 3048.57 352.451   4
   4   2   6 2557.18 285.282   1
  -4   2  -6 2079.41 234.164   3
  -4  -2  -6 2453.01 385.282   2
   4  -2   6 2384.55 309.572   1
  -4  -2  -7 289.444 147.104   2
   4  -2   7 319.773 179.094   2
   4   2   7 523.104 216.404   4
   4   2   7 243.793 104.042   1
   4  -2   7 210.751 93.7321   1
  -4   2  -7 203.851 117.967   3
   4   2   7 240.309 132.950   3
  -4  -2  -7 462.359 165.346   4
  -4  -2  -7 477.889 212.292   3
   4  -2   8 20935.4 1020.21   1
  -4  -2  -8 23421.8 1209.07   4
   4   2   8 23367.7 1235.31   4
  -4   2  -8 21186.1 1068.14   3
   4  -2   8 23997.6 1300.91   4
   4   2   8 24148.6 949.745   1
  -4  -2  -8 25222.0 1339.14   3
   4  -2   8 22605.1 1318.44   2
  -4  -2  -8 24518.8 1380.55   2
  -4   2  -9 6950.59 593.663   3
   4  -2   9 7546.10 729.269   4
   4   2   9 8056.57 717.978   4
   4   2   9 7317.62 412.389   1
   4  -2   9 6724.50 493.451   1
  -4  -2  -9 7464.12 728.826   3
  -4  -2  -9 7972.52 767.251   2
   4  -2   9 6977.45 701.459   2
   4  -2  10 1211.21 283.508   4
   4   2  10 974.717 303.085   4
  -4   2 -10 821.139 231.085   3
   4  -2  10 1502.50 220.975   1
  -4  -2 -10 1265.14 362.899   3
   4  -2  10 1458.34 308.414   2
   4  -2  11 15736.6 683.288   1
   4  -2  11 16433.5 1180.42   4
   4   2  11 16853.7 1188.26   4
  -4   2 -11 13976.8 985.176   3
  -4  -2 -11 17448.8 1223.35   3
   4  -2  11 15212.4 706.638   1
   4  -2  12 4.79762 178.062   4
  -4   2 -12 224.235 227.058   3
  -4  -2 -12 139.333 232.288   3
   4  -2  12 146.669 44.7926   1
   4  -2  13 8318.24 908.229   4
  -4   2 -13 7560.20 783.031   3
  -4  -2 -13 8918.05 923.531   3
   4  -2  14 4532.79 716.239   4
  -4   2 -14 3967.35 643.274   3
  -4  -2 -14 4397.84 681.908   3
   4  -2  15 4799.24 766.322   4
  -4  -2 -15 3794.96 672.168   3
  -4   2 -15 2641.36 560.285   3
   4  -2  16-85.7675 212.416   4
  -4  -2 -16-223.040 334.313   3
  -4   2 -16 523.385 353.242   3
   4  -2  17 1616.96 487.023   4
  -4   2 -17 1021.32 437.018   3
  -4  -2 -17 980.496 419.253   3
  -4   2 -18 3867.75 745.571   3
  -4  -2 -18 3705.93 753.253   3
  -4  -2 -19 747.899 436.301   3
   4  -3 -19 475.371 428.676   3
   4  -3 -18 4610.51 890.449   3
   4  -3 -17 2528.84 603.003   3
   4  -3 -16 5300.62 844.383   3
   4   3 -16 5113.48 529.345   1
   4  -3 -15 427.753 296.443   3
   4  -3 -15 1055.14 200.928   1
   4   3 -15 1093.69 259.441   1
   4  -3 -14 6177.78 605.585   1
   4   3 -14 5622.89 604.530   1
   4  -3 -14 6643.72 538.356   1
   4  -3 -14 5431.70 780.260   3
   4  -3 -13 6698.82 567.382   1
   4  -3 -13 6657.69 642.103   1
   4   3 -13 7250.11 673.665   1
   4  -3 -13 7131.53 829.354   3
   4   3 -12 49.1236 147.791   1
   4  -3 -12 173.215 221.726   3
   4   3 -12 40.1044 107.947   4
   4  -3 -12 236.881 159.344   1
   4   3 -11 7116.42 628.827   4
   4   3 -11 7085.52 658.614   1
   4  -3 -11 7198.98 780.508   3
   4   3 -10 29171.5 1321.15   4
   4  -3 -10 30309.6 1594.08   3
   4   3 -10 28152.2 1436.48   1
   4   3  -9 8434.04 592.861   4
   4  -3  -9 7888.62 736.046   3
   4   3  -9 7851.48 688.780   1
   4   3  -8 184.767 142.765   1
  -4  -3   8 358.396 164.968   1
   4   3  -8 286.377 107.113   4
   4   3  -7 7754.81 482.877   4
  -4  -3   7 7553.89 639.520   1
   4   3  -7 8189.90 671.049   1
  -4  -3   6 58588.9 1676.48   2
   4   3  -6 60494.2 1804.39   4
  -4  -3   6 60447.2 2209.44   1
   4   3  -6 59088.7 2244.59   1
   4   3  -5 2983.98 227.156   4
  -4  -3   5 2971.85 239.493   2
   4  -3  -5 2674.07 355.350   3
   4   3  -5 2791.32 383.015   1
   4   3  -4 678.026 89.8648   4
   4  -3  -4 846.376 189.854   3
   4   3  -4 757.391 225.117   1
   4   3  -3 6547.39 563.847   1
   4  -3  -3 6734.61 480.729   3
   4   3  -3 5547.24 224.477   4
  -4   3   2 891.170 159.203   3
   4   3  -2 1091.52 237.757   1
   4  -3  -2 633.893 141.178   3
   4   3  -1 5567.34 507.754   1
  -4   3   1 4930.75 333.564   3
   4   3   0 6646.57 284.147   4
  -4   3   0 7244.34 366.898   3
   4   3   0 6542.74 544.495   1
  -4  -3  -1 7440.34 557.472   1
  -4   3  -1 7598.10 356.736   3
   4   3   1 8146.09 374.131   4
   4   3   1 8201.22 604.966   1
  -4  -3  -2 13373.2 577.578   4
   4   3   2 12490.4 567.104   4
  -4  -3  -2 12653.4 747.303   1
   4   3   2 11575.4 746.656   1
  -4  -3  -3 6862.78 426.867   4
   4   3   3 6333.91 535.199   3
  -4  -3  -3 7056.52 536.039   1
   4   3   3 6951.29 542.542   1
   4   3   3 6807.73 431.098   4
   4   3   4 59312.1 2052.30   1
  -4  -3  -4 57879.4 1879.72   4
   4  -3   4 56938.0 2139.77   1
   4   3   4 60727.0 1919.93   4
   4   3   4 57465.8 2087.58   3
  -4  -3  -4 56749.8 1991.31   1
   4  -3   5 6268.19 570.734   1
   4   3   5 7241.81 527.087   4
   4   3   5 6355.28 564.902   3
   4   3   5 6731.05 523.003   1
  -4  -3  -5 7025.54 520.197   1
  -4  -3  -5 6498.77 489.985   4
   4   3   6 393.793 131.052   1
   4  -3   6 121.941 103.856   1
   4   3   6 274.348 113.827   3
  -4  -3  -6 271.479 105.716   1
  -4  -3  -6 129.686 115.206   4
  -4  -3  -6 246.135 149.927   2
   4   3   7 13633.2 922.416   3
   4  -3   7 11132.0 772.740   1
  -4  -3  -7 13169.9 706.101   1
   4  -3   7 12445.8 892.083   4
  -4  -3  -7 13288.4 828.443   4
   4   3   7 13793.6 758.955   1
  -4  -3  -7 13449.9 983.503   2
   4  -3   7 12045.9 919.563   2
   4  -3   8 16961.7 957.494   1
  -4  -3  -8 18355.5 1048.77   4
   4  -3   8 18089.5 1124.04   4
   4   3   8 17779.0 872.752   1
  -4  -3  -8 17352.2 1155.75   2
   4  -3   8 17235.4 1135.72   2
   4   3   8 16956.4 1094.06   3
   4  -3   9 1078.04 286.534   2
   4  -3   9 976.581 226.118   1
   4   3   9 1846.43 230.487   1
   4  -3   9 1116.54 298.187   4
   4  -3  10-109.817 220.173   4
   4   3  10 80.7550 62.5908   1
   4  -3  10-39.9090 97.3270   1
   4  -3  10 194.475 212.278   2
  -4  -3 -10-54.7157 237.314   3
  -4   3 -10 202.445 184.884   3
   4  -3  11 260.418 233.622   4
  -4   3 -11-94.9643 163.223   3
  -4  -3 -11 15.1485 208.559   3
   4  -3  11-85.8334 84.7311   1
   4  -3  11 316.219 239.217   2
   4  -3  12 2012.64 257.452   1
  -4  -3 -12 1834.06 451.825   3
   4  -3  12 2147.17 437.677   4
  -4   3 -12 1562.33 371.954   3
   4  -3  12 1384.68 358.959   2
  -4  -3 -13-57.8038 264.237   3
   4  -3  13 304.478 271.830   4
   4  -3  13 53.2977 47.3857   1
  -4   3 -13 246.543 251.159   3
   4  -3  14 4325.22 680.849   4
  -4  -3 -14 2792.26 588.479   3
  -4   3 -14 2995.91 530.161   3
   4  -3  15 859.536 369.889   4
  -4   3 -15 706.420 372.389   3
  -4  -3 -15-153.159 324.831   3
  -4   3 -16 176.079 314.874   3
   4  -3  16 96.1553 285.413   4
  -4  -3 -16 303.873 348.225   3
   4  -3  17 97.8059 240.669   4
  -4   3 -17 435.635 298.725   3
  -4  -3 -17-173.865 435.981   3
  -4  -3 -18 71.9170 404.075   3
  -4  -3 -19 126.534 372.171   3
   4  -4 -19 805.964 518.519   3
   4  -4 -18 4193.42 840.551   3
   4  -4 -17 250.410 341.848   3
   4   4 -16 2668.17 434.376   1
   4  -4 -16 2198.10 521.431   3
   4  -4 -15 87.6844 317.357   3
   4  -4 -15 8.55076 88.0612   1
   4   4 -15-204.782 148.365   1
   4  -4 -14 14606.1 867.938   1
   4  -4 -14 15261.9 999.099   1
   4  -4 -14 13079.5 1228.22   3
   4   4 -14 13168.9 1002.45   1
  -4  -4  14 13568.5 985.390   1
  -4  -4  13 17516.9 1124.23   1
   4  -4 -13 16661.8 1102.26   1
   4   4 -13 16114.6 1131.13   1
   4  -4 -13 15771.7 1285.45   3
   4  -4 -13 15716.6 940.690   1
   4   4 -12 11470.4 834.395   4
   4  -4 -12 12845.4 935.330   1
  -4  -4  12 11284.2 899.867   1
   4  -4 -12 12061.8 1064.72   3
   4   4 -12 11498.4 921.728   1
   4   4 -11 972.699 287.600   1
  -4  -4  11 1186.39 296.205   1
   4  -4 -11 907.278 250.231   1
   4   4 -11 811.185 219.389   4
   4  -4 -11 1510.00 388.948   3
   4  -4 -10 30618.9 1524.04   1
   4  -4 -10 33186.8 1682.89   3
   4   4 -10 28860.2 1264.11   4
   4   4 -10 30938.8 1552.41   1
   4  -4  -9 10707.4 888.822   3
   4   4  -9 10013.1 828.101   1
   4   4  -9 11116.9 677.596   4
   4   4  -8 35153.1 1253.48   4
   4  -4  -8 38917.0 1679.23   3
   4   4  -8 36766.1 1639.88   1
   4   4  -7 248.761 169.533   1
   4   4  -7 199.135 74.9404   4
   4  -4  -7 475.481 221.717   3
   4   4  -6 41657.8 1826.26   1
  -4   4   5 16430.9 907.448   3
   4   4  -5 16489.6 1004.90   1
  -4   4   4 83546.2 2629.21   3
   4  -4  -4 81170.9 2615.80   3
  -4   4   3 16065.4 851.361   3
   4  -4  -3 15968.4 863.076   3
   4   4  -3 14429.2 943.027   1
  -4   4   2 13916.4 723.932   3
   4   4  -2 12266.8 844.930   1
   4   4  -1 2072.06 334.963   1
  -4   4   1 1270.90 196.084   3
  -4   4   0 60265.3 1874.40   3
   4   4   0 61664.2 2248.68   1
  -4  -4  -1 5916.96 306.377   4
  -4  -4  -1 6026.74 542.820   1
   4   4   1 6176.58 562.297   1
   4  -4   2 332.910 157.803   1
  -4  -4  -2 343.656 132.730   1
  -4  -4  -2 234.049 74.8294   4
   4   4   2 654.506 211.495   1
   4  -4   3 18555.0 1124.79   1
  -4  -4  -3 18997.8 1003.99   1
  -4  -4  -3 19662.3 819.821   4
   4   4   3 19470.2 1058.51   1
  -4  -4  -4 35169.7 1287.94   4
   4  -4   4 31886.3 1564.66   1
  -4  -4  -4 33476.0 1427.01   1
   4   4   4 33032.8 1549.60   3
   4   4   4 35402.5 1510.27   1
   4  -4   5 23833.5 1282.23   1
  -4  -4  -5 24398.7 1073.01   4
  -4  -4  -5 23033.6 1127.48   1
   4   4   5 24220.7 1284.49   3
   4   4   5 23908.4 1193.74   1
  -4  -4  -6 18842.1 965.145   1
   4  -4   6 17790.4 1086.76   1
   4   4   6 18268.3 1117.26   3
  -4  -4  -6 19279.3 982.224   4
   4   4   6 19408.6 1054.65   1
  -4  -4  -7 1651.38 266.689   1
  -4  -4  -7 1357.41 258.587   4
   4   4   7 1674.12 347.993   3
   4  -4   7 2101.58 376.778   4
   4  -4   7 1064.65 250.650   1
   4   4   7 1681.26 286.096   1
  -4  -4  -8 28531.2 1381.03   4
   4  -4   8 24594.3 1315.34   1
   4   4   8 28014.2 1248.43   1
   4   4   8 26168.1 1475.87   3
   4  -4   8 24242.0 1392.20   4
   4  -4   8 26546.8 1497.46   2
  -4  -4  -8 26018.3 1151.69   1
   4  -4   9 7402.55 770.379   2
  -4  -4  -9 7369.68 510.293   1
   4  -4   9 8212.51 787.909   4
   4   4   9 8344.31 592.339   1
   4  -4   9 7207.76 645.256   1
   4  -4  10 17402.7 1047.42   1
   4   4  10 19487.8 899.950   1
   4  -4  10 20184.6 1314.39   4
   4  -4  10 16854.0 1220.46   2
   4   4  11 794.784 141.906   1
   4  -4  11 991.245 382.772   4
   4  -4  11 652.431 194.817   1
   4  -4  11 774.302 277.716   2
   4  -4  12 6973.74 814.800   4
   4  -4  12 6657.22 570.391   1
   4  -4  12 5296.48 699.757   2
   4  -4  13 3761.01 639.687   4
  -4   4 -13 3497.30 548.178   3
   4  -4  13 2889.49 538.865   2
   4  -4  14 15302.9 1301.89   4
  -4   4 -14 11991.8 1078.07   3
   4  -4  15 561.338 331.991   4
  -4   4 -15 880.579 396.927   3
   4  -4  16 211.883 281.568   4
  -4   4 -16 418.877 337.176   3
   4  -4  17 536.146 356.691   4
   4  -5 -18 41.3332 337.071   3
   4  -5 -17 328.780 428.622   3
   4   5 -16 922.198 299.582   1
   4  -5 -16 1083.48 482.070   3
   4   5 -15 10600.8 922.142   1
   4  -5 -15 10448.4 1158.40   3
   4  -5 -15 9913.98 712.237   1
   4  -5 -14 4391.11 731.287   3
   4   5 -14 3992.04 577.222   1
   4  -5 -13 4281.41 560.074   1
  -4  -5  13 4260.28 575.775   1
   4  -5 -13 3495.05 635.628   3
   4   5 -13 3802.45 561.251   1
  -4  -5  12 5523.15 659.671   1
   4  -5 -12 5480.38 631.625   1
   4  -5 -12 5561.83 754.242   3
   4   5 -12 7103.44 764.329   1
   4  -5 -11 55262.5 2346.89   1
  -4  -5  11 53149.6 2343.28   1
   4   5 -11 54184.5 2415.43   1
   4  -5 -11 53966.8 2509.68   3
   4   5 -10-80.5387 151.427   1
   4  -5 -10 60.9813 122.833   1
  -4  -5  10 46.3616 136.706   1
   4  -5 -10-14.1837 218.082   3
   4  -5  -9 6720.25 687.098   1
  -4  -5   9 8101.76 761.215   1
   4   5  -9 8593.89 809.328   1
   4  -5  -9 7098.20 751.398   3
   4   5  -8 8707.14 792.771   1
   4  -5  -8 7600.93 742.556   1
  -4  -5   8 7962.83 751.799   1
   4  -5  -8 8753.87 785.956   3
   4  -5  -7 13386.8 985.433   1
   4  -5  -7 14477.7 995.727   3
   4   5  -7 13195.9 1014.89   1
  -4  -5   7 12007.5 944.199   1
  -4  -5   6 886.111 257.495   1
   4   5  -6 775.022 242.287   1
  -4   5   6 943.485 257.548   3
   4  -5  -6 839.502 255.878   1
   4  -5  -5 27160.3 1495.46   1
  -4   5   5 30796.1 1415.66   3
   4   5  -5 25776.5 1445.92   1
   4   5  -4 1517.48 317.945   1
   4  -5  -4 1597.16 330.215   1
   4  -5  -4 1854.22 322.302   3
  -4   5   4 1697.07 304.291   3
  -4   5   3 50453.9 1838.84   3
   4   5  -3 43916.7 1977.36   1
   4   5  -2 1902.89 341.343   1
  -4   5   2 1667.15 275.521   3
  -4   5   1 90248.4 2806.32   3
   4   5  -1 90619.9 3135.51   1
  -4   5   0 20970.3 970.167   3
  -4  -5   0 21509.5 1212.23   1
  -4  -5   0 21353.3 661.420   4
   4   5   0 22375.9 1231.19   1
  -4  -5  -1 13300.6 910.959   1
  -4  -5  -1 12778.7 516.858   4
   4   5   1 13693.3 936.721   1
  -4  -5  -2 18216.2 1076.34   1
  -4  -5  -2 17864.6 728.380   4
   4   5   2 18715.5 1112.50   1
  -4  -5  -3 60174.7 2273.50   1
  -4  -5  -3 59422.7 1869.93   4
   4   5   3 60439.3 2338.18   1
   4   5   4 536.400 214.408   1
  -4  -5  -4 418.986 160.234   1
  -4  -5  -4 396.363 124.588   4
   4   5   4 284.109 162.233   3
  -4  -5  -5 4185.18 468.012   1
  -4  -5  -5 4269.27 398.507   4
   4   5   5 4700.27 562.110   3
   4   5   5 4485.29 513.256   1
  -4  -5  -6 138.294 96.4172   4
  -4  -5  -6 372.481 155.739   1
   4   5   6 133.939 155.887   3
   4   5   6 286.542 151.425   1
  -4  -5  -7 13263.6 855.716   4
  -4  -5  -7 13379.7 841.865   1
   4   5   7 14704.3 1077.90   3
   4   5   7 15267.0 972.130   1
  -4  -5  -8 2202.48 323.650   1
  -4  -5  -8 2046.88 324.018   4
   4   5   8 2861.37 400.707   1
   4  -5   8 2047.50 376.599   4
  -4  -5  -9 636.742 198.558   1
   4  -5   9 527.116 202.107   4
   4   5   9 553.303 188.292   1
   4  -5  10 1846.01 420.750   2
   4  -5  10 2164.36 425.617   4
   4   5  10 2316.86 323.907   1
  -4  -5 -10 1907.99 271.312   1
   4  -5  11 7340.91 837.429   2
   4   5  11 9544.68 625.665   1
   4  -5  11 10476.0 979.125   4
  -4  -5 -11 9041.73 546.111   1
   4  -5  12 2327.54 500.821   2
   4  -5  12 3063.41 571.231   4
   4  -5  13 1440.76 400.632   4
   4  -5  13 1473.81 381.092   2
   4  -5  14-93.4070 207.403   4
   4  -5  14 479.962 294.998   2
   4  -5  15 1073.19 425.050   4
  -4   5 -15 667.308 347.599   3
  -4   5 -16 433.941 364.050   3
   4  -5  16 1066.47 455.495   4
   4  -6 -18 927.657 482.197   3
   4  -6 -17 2028.93 673.511   3
   4   6 -16 5497.36 705.906   1
   4  -6 -16 5974.18 953.006   3
   4   6 -15 108.963 143.705   1
   4  -6 -15 255.809 271.947   3
   4   6 -14 422.201 236.258   1
   4  -6 -14 201.586 301.213   3
   4  -6 -13 5731.60 805.437   3
   4   6 -13 5652.11 739.495   1
   4  -6 -12 26552.0 1588.50   1
   4   6 -12 27545.9 1686.36   1
   4  -6 -12 28945.3 1811.12   3
   4  -6 -11-96.0404 240.414   1
   4  -6 -11 389.250 280.055   3
   4   6 -11 118.836 194.112   1
   4  -6 -10 5723.30 690.460   1
  -4  -6  10 5907.31 696.910   1
   4  -6 -10 4905.92 667.156   3
   4   6 -10 5068.71 687.553   1
   4  -6  -9 51523.8 2304.77   1
  -4  -6   9 46307.4 2194.16   1
   4   6  -9 44895.9 2253.46   1
   4  -6  -9 48916.9 2271.92   3
  -4  -6   9 50138.5 1818.73   4
   4   6  -8 23582.8 1526.72   1
   4  -6  -8 23697.3 1470.77   1
  -4  -6   8 26658.9 1540.09   1
  -4  -6   8 26200.6 1120.22   4
   4  -6  -8 27137.7 1539.35   3
   4   6  -7 6553.06 741.783   1
  -4  -6   7 6927.98 733.932   1
   4  -6  -7 7483.76 778.423   1
  -4  -6   7 7508.05 487.533   4
  -4   6   7 7601.40 732.278   3
   4  -6  -7 8263.44 777.348   3
  -4  -6   6-226.737 182.297   1
   4   6  -6 70.3653 204.783   1
   4  -6  -6 49.2402 126.298   1
  -4  -6   6-39.2775 82.6608   4
   4  -6  -6-72.9147 219.714   3
  -4   6   6 63.0257 142.423   3
   4   6  -5 926.839 321.465   1
  -4  -6   5 1116.27 309.077   1
   4  -6  -5 981.866 280.158   1
  -4  -6   5 1096.66 139.779   4
  -4   6   5 1117.60 296.331   3
   4  -6  -4 12276.9 992.354   1
  -4  -6   4 11059.4 445.290   4
  -4   6   4 12963.4 887.448   3
   4   6  -4 13472.2 1024.73   1
   4   6  -3 7207.78 731.071   1
   4  -6  -3 5839.73 669.658   1
  -4  -6   3 5707.33 236.585   4
  -4   6   3 6321.29 593.216   3
  -4   6   2 8655.47 688.867   3
   4   6  -2 7697.22 762.559   1
  -4  -6   1 33744.1 963.432   4
   4   6  -1 34804.1 1753.14   1
  -4   6   1 39023.5 1552.18   3
  -4  -6   0 28769.9 1540.26   1
  -4  -6   0 28391.6 890.660   4
   4   6   0 28487.3 1549.70   1
  -4   6   0 29128.5 1302.05   3
  -4  -6  -1 86405.1 3092.33   1
  -4  -6  -1 83450.2 2305.26   4
   4   6   1 79695.5 3061.11   1
  -4  -6  -2 1804.36 339.079   1
  -4  -6  -2 1834.54 204.000   4
   4  -6   2 1589.47 376.042   1
   4   6   2 1646.22 340.720   1
  -4  -6  -3 3531.96 320.672   4
   4  -6   3 4177.49 569.085   1
  -4  -6  -3 4234.31 525.282   1
   4   6   3 4313.64 554.201   1
  -4  -6  -4 1742.82 242.957   4
   4  -6   4 1868.90 372.202   1
   4   6   4 1963.96 430.590   3
   4   6   4 2211.09 409.151   1
  -4  -6  -4 2210.70 381.516   1
   4   6   5 52142.2 2218.33   1
  -4  -6  -5 51385.4 2110.10   1
   4  -6   5 47997.1 2243.80   1
   4   6   5 50019.6 2279.84   3
  -4  -6  -5 49757.6 1808.11   4
  -4  -6  -6 24433.7 1309.36   1
  -4  -6  -6 24078.7 1163.95   4
   4   6   6 24410.1 1405.14   1
   4  -6   6 24537.9 1475.51   1
  -4  -6  -7 3973.15 465.270   1
  -4  -6  -7 3608.50 421.894   4
   4  -6   7 3139.25 496.707   1
   4   6   7 4472.65 551.746   1
  -4  -6  -8 681.789 191.143   1
  -4  -6  -8 868.670 248.684   4
   4  -6   8 813.577 287.987   1
   4   6   8 793.048 260.824   1
   4  -6   8 920.325 318.782   4
   4  -6   9 17383.2 1215.87   4
   4  -6   9 15712.4 1155.94   1
  -4  -6  -9 14863.5 938.437   1
   4   6   9 17316.6 1093.71   1
   4  -6  10 7761.79 819.636   4
   4   6  10 7363.09 666.820   1
  -4  -6 -10 6138.16 552.898   1
   4  -6  10 5776.67 686.263   1
   4  -6  11 2433.33 503.678   2
   4   6  11 3553.13 431.684   1
   4  -6  11 2709.81 528.162   4
   4  -6  11 2556.34 460.957   1
   4  -6  12 1125.48 411.049   2
   4  -6  12 1885.11 459.090   4
   4  -6  13 7395.58 905.682   2
   4  -6  13 9698.75 1028.05   4
   4  -6  14 599.358 296.994   4
   4  -6  14-15.5071 296.634   2
   4  -6  15 360.457 288.034   4
   4  -6  15-345.630 283.543   2
   4  -6  16 558.618 341.734   4
   4  -7 -17 273.099 349.397   3
   4   7 -16 14133.4 1214.85   1
   4  -7 -16 16802.0 1587.64   3
   4   7 -15-180.401 252.689   1
   4  -7 -15 227.516 337.881   3
   4  -7 -14 7087.20 940.298   3
   4   7 -14 5942.97 781.391   1
   4   7 -13 2500.37 529.786   1
   4  -7 -13 2847.23 603.665   3
   4   7 -12 3738.86 635.166   1
  -4  -7  12 3078.61 209.438   2
   4   7 -11 405.566 306.144   1
   4  -7 -11-19.1889 271.822   3
   4   7 -10 13904.5 1206.29   1
   4  -7 -10 14641.9 1239.55   3
  -4  -7  10 15792.7 927.112   4
  -4  -7   9 890.531 202.965   4
   4  -7  -9 937.050 323.562   3
   4   7  -9 1068.72 386.839   1
   4  -7  -8 363.707 208.531   1
  -4  -7   8 317.130 113.760   4
   4  -7  -8 160.499 198.565   3
   4   7  -8 154.685 174.671   1
   4  -7  -7-46.0289 166.629   1
  -4  -7   7 44.9014 71.6638   4
   4   7  -7 24.7967 212.609   1
   4  -7  -6 40507.9 2091.34   1
  -4  -7   6 40988.4 1370.05   4
   4   7  -6 39285.3 2101.34   1
  -4   7   6 45409.3 2042.94   3
  -4  -7   5 341.697 88.1081   4
   4  -7  -5 69.3654 137.858   1
  -4   7   5 87.8211 137.098   3
   4   7  -5 295.155 196.252   1
  -4  -7   4 1109.71 126.072   4
   4  -7  -4 1391.37 359.757   1
  -4   7   4 1450.90 308.343   3
  -4  -7   4 1793.23 404.242   1
   4   7  -4 932.309 303.980   1
  -4  -7   3 7844.32 816.736   1
  -4  -7   3 6841.62 315.612   4
  -4   7   3 7626.02 700.860   3
   4  -7  -3 7394.42 797.036   1
   4   7  -3 7166.61 798.438   1
   4  -7  -2 58528.9 2591.81   1
  -4   7   2 59872.7 2280.45   3
   4   7  -2 52834.3 2509.31   1
  -4  -7   2 56603.1 2509.77   1
   4  -7  -1 1759.82 417.362   1
  -4   7   1 1018.82 258.161   3
  -4  -7   1 750.184 269.280   1
   4   7  -1 1125.09 342.615   1
   4  -7   0 3870.43 584.787   1
  -4  -7   0 3756.98 541.974   1
  -4   7   0 3277.73 439.518   3
   4   7   0 4215.13 598.682   1
   4  -7   1 7952.03 861.196   1
   4   7   1 9818.23 925.636   1
  -4  -7  -1 10232.8 506.030   4
  -4  -7  -1 10180.2 908.114   1
   4   7   2 65921.6 2769.07   1
   4  -7   2 67133.3 2835.77   1
  -4  -7  -2 63893.2 2010.84   4
  -4  -7  -2 70204.2 2775.59   1
  -4  -7  -3 27508.6 1537.15   1
  -4  -7  -3 25593.2 1057.03   4
   4  -7   3 24733.9 1571.02   1
   4   7   3 25849.3 1547.10   1
   4  -7   4 18021.7 1324.98   1
   4   7   4 19428.9 1314.80   1
  -4  -7  -4 20368.0 1289.45   1
  -4  -7  -4 19364.6 936.471   4
  -4  -7  -5 530.719 153.393   4
   4  -7   5 694.741 279.539   1
   4   7   5 432.319 227.382   1
  -4  -7  -5 570.879 211.630   1
  -4  -7  -6 99163.2 3178.87   4
  -4  -7  -6 100784. 3518.75   1
   4  -7   6 97966.7 3749.56   1
   4   7   6 99680.8 3641.76   1
  -4  -7  -7 3489.64 496.285   1
  -4  -7  -7 3263.52 422.855   4
   4   7   7 3204.68 492.360   1
   4  -7   8 63873.1 2685.54   4
  -4  -7  -8 57895.6 2380.49   1
   4   7   8 63648.7 2627.34   1
   4  -7   9 795.750 279.676   4
   4   7   9-25.6181 238.951   1
  -4  -7  -9 560.012 202.100   1
   4  -7  10-77.8704 222.093   4
   4   7  10 132.089 164.633   1
  -4  -7 -10-69.7896 129.492   1
   4  -7  11-425.710 356.396   4
   4   7  11 262.206 220.971   1
   4  -7  12 22451.3 1578.59   4
   4  -7  12 19776.5 1528.78   2
   4  -7  13-96.8456 247.753   2
   4  -7  13-67.7045 251.968   4
   4  -7  14 1631.23 494.092   4
   4  -7  14 1330.25 389.271   2
   4  -7  15 281.232 270.679   4
   4  -8 -16 6997.37 1059.75   3
   4  -8 -15 1102.58 502.076   3
   4   8 -15 365.435 252.628   1
   4   8 -14 600.374 329.752   1
   4  -8 -14-28.8066 360.997   3
   4   8 -13 4915.49 777.399   1
   4  -8 -13 4973.37 814.585   3
   4   8 -12 1685.79 500.495   1
   4  -8 -12 2257.88 551.758   3
  -4  -8  11 214.976 147.660   4
   4   8 -11 99.3276 232.022   1
  -4  -8  10-43.5017 109.121   4
   4   8 -10 120.648 231.341   1
  -4  -8   9 1672.01 261.465   4
   4   8  -9 1454.78 399.943   1
  -4  -8   8 6245.28 482.102   4
   4   8  -8 5625.91 805.454   1
  -4  -8   7 52637.9 1741.58   4
   4   8  -7 49023.9 2576.14   1
  -4  -8   6 7322.10 448.704   4
   4   8  -6 6646.22 847.806   1
  -4  -8   5 3213.61 260.369   4
   4   8  -5 2864.53 556.073   1
  -4  -8   4 7500.58 394.706   4
  -4   8   4 8995.75 821.827   3
   4   8  -4 7370.33 855.956   1
  -4   8   3 3805.32 527.773   3
   4   8  -3 2511.36 527.866   1
  -4  -8   3 2891.01 217.484   4
   4   8  -2 16571.7 1306.63   1
  -4   8   2 16290.0 1133.60   3
  -4   8   1 3984.98 527.495   3
   4   8  -1 3530.64 612.603   1
   4   8   0 2250.74 478.096   1
  -4   8   0 1877.47 372.535   3
   4   8   1 44442.8 2282.59   1
   4   8   2 10980.6 1039.02   1
  -4  -8  -2 12005.8 641.302   4
  -4  -8  -3 16204.4 809.393   4
   4   8   3 15183.2 1237.33   1
  -4  -8  -4 386.456 137.778   4
   4   8   4 608.031 211.650   1
   4   8   5 25870.4 1622.42   1
  -4  -8  -5 24598.0 1174.88   4
  -4  -8  -6 1491.84 273.825   4
   4   8   6 1701.21 392.249   1
  -4  -8  -7 5806.25 572.223   4
   4   8   7 6921.19 807.611   1
   4   8   8 200.970 174.014   1
   4   8   9 4038.53 609.917   1
   4  -8   9 4060.98 608.739   4
   4  -8  10 2697.74 530.768   4
   4   8  10 2952.76 512.707   1
   4   8  11 2503.40 469.544   1
   4  -8  11 3533.16 630.000   4
   4  -8  12-312.073 293.883   2
   4  -8  12 292.986 358.595   4
   4  -8  13 2721.22 611.324   2
   4  -8  13 3219.18 615.722   4
   4  -8  14 561.865 270.762   2
   4  -8  14 1982.93 514.460   4
   4  -8  15 5935.24 867.929   4
   4   9 -15 1461.26 432.708   1
   4   9 -14 1168.80 407.252   1
   4   9 -13-48.9273 210.377   1
  -4  -9  12 1198.58 311.486   4
   4   9 -12 899.099 381.230   1
   4   9 -11 16465.5 1474.84   1
  -4  -9  11 18019.7 1060.58   4
  -4  -9  10 2087.38 326.063   4
   4   9 -10 1245.11 420.779   1
  -4  -9   9 1222.11 234.507   4
   4   9  -9 1283.01 475.731   1
   4   9  -8 3094.84 607.836   1
  -4  -9   8 3184.46 343.820   4
   4   9  -7 29892.6 2008.73   1
  -4  -9   7 31917.2 1227.35   4
  -4  -9   6 6331.47 428.708   4
   4   9  -6 6269.07 883.840   1
  -4  -9   5 5772.16 379.896   4
   4   9  -5 6307.47 869.759   1
   4   9  -4 12922.7 1217.12   1
  -4  -9   4 14041.7 616.160   4
   4   9  -3 15498.4 1330.44   1
   4   9  -2 250.616 262.756   1
  -4   9   2 14.7603 186.605   3
   4   9  -1 33501.3 2018.08   1
  -4   9   1 33946.3 1788.85   3
   4   9   0 4894.38 752.265   1
  -4   9   0 4632.55 598.327   3
   4   9   1 4983.22 733.930   1
  -4  -9  -2 221.969 101.723   4
   4   9   2 83.9368 282.208   1
  -4  -9  -3 8550.52 589.107   4
   4   9   3 8409.72 969.310   1
  -4  -9  -4 531.432 167.552   4
   4   9   4-83.8177 238.163   1
  -4  -9  -5 61.4030 107.042   4
   4   9   5-63.3446 263.637   1
  -4  -9  -6 573.328 174.371   4
   4   9   6 599.454 289.644   1
   4   9   7 17470.5 1400.87   1
   4   9   8 12950.3 1177.17   1
   4   9   9 3227.63 602.823   1
   4  -9   9 3326.27 572.243   4
   4  -9  10 3792.28 642.452   4
   4   9  10 3035.08 555.891   1
   4   9  11 17865.8 1371.45   1
   4  -9  11 18666.8 1461.78   4
   4  -9  12 47.2847 245.003   4
   4  -9  13 108.334 324.096   2
   4  -9  13 702.938 325.372   4
   4  -9  14 457.050 302.258   4
   4  10 -15 3067.99 692.076   1
   4  10 -14 3621.20 746.128   1
   4  10 -13 518.094 321.048   1
   4  10 -12 5422.62 900.602   1
  -4 -10  12 5927.29 628.698   4
  -4 -10  11 2088.93 348.840   4
   4  10 -11 2021.61 569.243   1
  -4 -10  10 13730.9 865.244   4
   4  10 -10 12784.0 1352.44   1
   4  10  -9 737.477 366.425   1
  -4 -10   9 766.675 193.486   4
  -4 -10   8 14538.6 802.822   4
   4  10  -8 16058.3 1501.62   1
  -4 -10   7 662.603 150.328   4
   4  10  -7 550.233 329.447   1
  -4 -10   6 712.820 144.300   4
   4  10  -6-203.569 351.910   1
  -4 -10   5 3195.14 295.689   4
   4  10  -5 3262.09 640.278   1
   4  10  -4 19608.6 1609.72   1
  -4 -10   4 20530.4 829.293   4
   4  10  -3 10538.6 1155.34   1
   4  10  -2 126.449 307.196   1
   4  10  -1 267.809 217.051   1
   4  10   0 42719.8 2452.92   1
   4  10   1 98.2472 224.317   1
   4  10   2 85.3593 220.526   1
  -4 -10  -3-29.3758 109.712   4
   4  10   3 118.118 227.676   1
  -4 -10  -4 23570.5 1152.06   4
   4  10   4 22475.9 1720.01   1
  -4 -10  -5 167.036 134.406   4
   4  10   5 314.570 347.489   1
   4  10   6 19701.8 1595.15   1
   4  10   7-116.388 260.665   1
   4  10   8 7489.98 959.405   1
   4 -10   9 248.721 237.331   4
   4  10   9-150.376 255.051   1
   4 -10  10 14675.0 1278.54   4
   4  10  10 14532.8 1340.77   1
   4 -10  11 296.282 278.759   4
   4  10  11 681.939 361.512   1
   4 -10  12-248.281 309.010   4
   4 -10  13 2941.13 604.765   4
   4  11 -15 2567.64 661.898   1
   4  11 -14 5443.41 941.780   1
   4  11 -13 169.274 301.106   1
   4  11 -12 614.876 499.780   1
   4  11 -11 4580.43 861.473   1
   4  11 -10 9344.61 1210.97   1
   4  11  -9 1015.30 468.151   1
   4  11  -8 856.508 413.396   1
   4  11  -7 1774.73 528.592   1
  -4 -11   7 1727.34 253.010   4
  -4 -11   6 13762.1 713.470   4
   4  11  -6 13825.9 1435.60   1
  -4 -11   5 515.978 137.307   4
   4  11  -5 663.664 413.485   1
  -4 -11   4 2658.99 269.796   4
   4  11  -4 2565.98 626.039   1
   4  11  -3 3476.40 702.286   1
   4  11  -2 18100.1 1620.56   1
   4  11  -1 3645.59 729.521   1
   4  11   0 6691.85 955.729   1
   4  11   1 503.075 417.641   1
   4  11   2 2088.58 598.752   1
   4  11   3 8182.08 1067.36   1
   4  11   4 12740.7 1339.91   1
   4  11   5 1636.42 494.641   1
   4  11   6 1425.37 468.050   1
   4  11   7 1026.12 456.034   1
   4  11   8 1621.41 523.531   1
   4 -11   9 2846.77 546.823   4
   4  11   9 2620.75 605.873   1
   4  11  10-225.430 341.537   1
   4 -11  10 69.1561 258.771   4
   4 -11  11 72.2181 253.758   4
   4 -11  12 7488.91 958.639   4
   4  12 -14 477.272 462.481   1
   4  12 -13 4568.90 936.464   1
   4  12 -12-181.748 276.568   1
   4  12 -11 959.144 471.415   1
   4  12 -10 1702.51 596.058   1
   4  12  -9 8874.34 1223.31   1
   4  12  -8 775.484 445.109   1
   4  12  -7 4158.15 815.805   1
   4  12  -6-335.510 446.945   1
   4  12  -5 25017.5 2040.65   1
   4  12  -4 1344.80 467.019   1
   4  12  -3 12304.4 1384.09   1
   4  12  -2 3770.67 792.979   1
   4  12  -1 3057.98 743.151   1
   4  12   0 1083.18 521.606   1
   4  12   1 30896.6 2246.72   1
   4  12   2 273.582 266.388   1
   4  12   3 1041.20 404.831   1
   4  12   4 1490.71 500.618   1
   4  12   5 18516.7 1740.32   1
   4  12   6 595.571 365.592   1
   4  12   7 987.113 383.483   1
   4  12   8 1565.79 506.881   1
   4  12   9 17926.7 1707.13   1
   4 -12   9 18307.9 1457.34   4
   4  12  10 4996.59 910.659   1
   4 -12  10 3722.08 667.723   4
   4 -12  11 785.042 352.883   4
   4  13 -12 3893.02 869.911   1
   4  13 -11-456.139 467.698   1
   4  13 -10 3129.32 828.407   1
   4  13  -9 3845.73 872.740   1
   4  13  -8 2827.84 721.673   1
   4  13  -7 393.146 277.899   1
   4  13  -6 10659.6 1369.14   1
   4  13  -5 14814.7 1624.24   1
   4  13  -4 1071.71 458.209   1
   4  13  -3 3511.52 806.680   1
   4  13  -2 10945.7 1382.57   1
   4  13  -1 9329.02 1275.36   1
   4  13   0 2380.40 639.805   1
   4  13   1 1946.63 620.769   1
   4  13   2 9025.77 1235.80   1
   4  13   3 4229.37 858.334   1
   4  13   4 1463.46 529.336   1
   4  13   5 90.9113 270.628   1
   4  13   6 6373.82 1084.78   1
   4  13   7 6292.86 1069.94   1
   4  13   8 4694.43 911.585   1
   4 -13   9-123.760 222.733   4
   4  13   9 171.550 281.904   1
   4 -13  10 1633.99 437.508   4
   4  14  -7 439.393 473.692   1
   4  14  -6 379.819 399.917   1
   4  14  -5 1931.62 627.363   1
   4  14  -4 9301.36 1323.84   1
   4  14  -3 71.1931 389.756   1
   4  14  -2 2534.96 700.734   1
   4  14  -1 67.4362 303.648   1
   4  14   0 97.2627 354.873   1
   4  14   1 929.856 586.441   1
   4  14   2 6607.31 1138.23   1
   4  14   3 427.316 558.737   1
   4  14   4 298.982 288.049   1
   4  14   5-114.657 500.649   1
   4  14   6 5959.60 1106.70   1
   4  14   7-712.558 548.975   1
   4  14   8 1168.52 528.965   1
   5   0 -19 4748.91 961.727   3
   5   0 -18 158.224 433.252   3
   5   0 -17 1798.89 574.689   3
   5   0 -16-69.7042 118.928   1
   5   0 -16-642.932 426.242   3
   5   0 -15 235.339 168.499   1
   5   0 -14-16.7166 123.609   1
   5   0 -13 26437.1 1334.09   1
   5   0 -12-55.7252 127.997   1
   5   0 -11 1651.52 313.577   4
   5   0 -11 1728.64 307.780   1
   5   0 -10-165.018 146.152   4
   5   0 -10 70.0309 116.696   1
   5   0  -9 31962.1 1479.11   1
   5   0  -8 48.3469 114.251   1
   5   0  -7 150.076 116.237   1
   5   0  -6 23.4929 125.859   1
   5   0  -5 10284.2 735.230   1
   5   0  -4 22.2800 115.926   1
   5   0  -3 3881.15 414.939   1
   5   0  -2 0.30100 87.4773   2
   5   0  -2-1.15531 99.7691   1
   5   0  -1 179027. 5031.49   1
   5   0  -1 178298. 4954.77   2
   5   0   0 4.00728 108.369   2
   5   0   0 16.4172 88.1932   1
   5   0   1 38295.9 1512.58   1
   5   0   1 37492.7 1550.75   2
   5   0   2 60.0464 136.146   2
   5   0   2-46.6535 116.997   1
   5   0   2-22.8098 45.0062   3
   5   0   3 7312.82 551.788   1
   5   0   3 6846.13 378.350   3
   5   0   3 7557.72 643.097   2
   5   0   4-62.7718 100.471   1
   5   0   4-50.7984 153.209   2
   5   0   5 29034.6 1226.46   1
   5   0   5 30157.6 1489.63   2
   5   0   6-39.7768 79.2531   1
  -5   0  -6 22.7195 96.1240   3
   5   0   6 168.990 134.828   4
   5   0   6-165.425 189.446   2
   5   0   7 2598.33 295.267   1
  -5   0  -7 2744.24 349.621   3
   5   0   7 2691.97 385.113   4
   5   0   8 158.480 154.882   4
  -5   0  -8-61.1707 163.360   3
   5   0   8-7.62930 82.2584   1
   5   0   9 24908.3 1388.61   4
   5   0   9 23362.1 952.173   1
  -5   0  -9 25022.7 1281.46   3
   5   0  10 217.181 88.7211   1
   5   0  10 98.8830 161.493   4
  -5   0 -10-44.9362 189.815   3
   5   0  10 230.212 84.3469   1
   5   0  11 134.827 212.676   4
  -5   0 -11-29.6817 190.821   3
   5   0  12 328.015 296.168   4
  -5   0 -12-412.003 272.103   3
   5   0  13 5632.36 757.882   4
  -5   0 -13 5493.50 693.682   3
   5   0  14-54.1219 212.121   4
  -5   0 -14 106.724 254.545   3
   5   0  15 1026.67 426.082   4
  -5   0 -15 1381.33 416.129   3
  -5   0 -16-269.254 359.613   3
  -5   0 -17 1927.72 504.281   3
   5  -1 -19-646.403 507.070   3
   5   1 -19 398.169 520.566   3
   5  -1 -18 26.3270 448.771   3
   5   1 -18 159.459 467.871   3
   5  -1 -17 5174.17 873.043   3
   5   1 -16 8109.15 663.155   1
   5  -1 -16 8381.11 1055.95   3
   5  -1 -16 8779.53 644.460   1
   5  -1 -15 14118.4 880.374   1
   5  -1 -15 15539.2 1397.86   3
   5   1 -15 13713.5 919.263   1
   5  -1 -14 611.007 201.254   1
   5   1 -14 578.898 223.404   1
   5  -1 -14 421.240 293.585   3
   5  -1 -14 582.405 114.957   2
   5  -1 -13 5627.13 788.824   3
   5   1 -13 5341.65 577.153   1
   5  -1 -13 5257.12 534.624   1
   5   1 -12 23327.8 1269.43   1
   5  -1 -12 22418.7 1201.72   1
   5   1 -11 14721.0 975.403   1
   5   1 -11 15343.4 971.300   4
   5  -1 -11 15148.5 950.008   1
   5   1 -10 13466.4 906.480   1
   5   1 -10 14129.1 892.476   4
   5  -1 -10 14196.3 915.861   1
   5  -1  -9 36524.5 1607.87   1
   5   1  -9 36613.8 1522.80   4
   5   1  -9 35802.8 1606.26   1
   5  -1  -8 33522.0 1518.95   1
   5   1  -8 35585.4 1432.23   4
   5   1  -8 35448.2 1574.19   1
   5  -1  -7 58010.2 2055.93   1
   5   1  -7 60145.8 2121.25   1
   5   1  -6 25461.8 1255.84   1
   5  -1  -6 26930.1 1243.36   1
   5   1  -6 24101.8 872.950   2
   5   1  -5 13483.3 850.565   1
   5   1  -5 12726.3 600.889   2
   5   1  -4 809.098 211.440   1
   5   1  -4 726.488 145.016   2
   5   1  -3 140074. 4071.89   1
   5   1  -3 132087. 3766.04   2
   5   1  -2 22971.1 1139.63   1
   5   1  -2 23142.4 1021.92   2
   5   1  -1 405.868 151.891   1
   5   1  -1 171.373 88.4717   2
   5   1   0 263.490 111.700   1
   5   1   0 250.169 178.247   2
   5   1   1 20281.4 1022.54   1
   5   1   1 20741.5 1060.93   2
   5   1   2 92643.3 2718.76   4
   5   1   2 91383.4 2912.95   1
   5   1   2 94412.2 3043.18   2
   5  -1   2 93773.0 3059.65   2
   5   1   3 63373.4 2052.65   4
   5   1   3 64653.5 2186.33   1
   5   1   3 62564.9 1975.86   3
   5   1   3 66459.9 2364.97   2
   5  -1   3 62106.2 2336.45   2
   5  -1   4 346.884 167.958   2
   5   1   4 330.616 148.595   4
   5   1   4 159.567 107.077   3
   5   1   4 163.757 98.2357   1
   5   1   5 80090.6 2515.39   3
  -5   1  -5 83953.2 2339.66   3
   5  -1   5 82211.3 2920.72   2
  -5  -1  -5 75710.9 2811.56   2
   5   1   5 76857.1 2521.28   1
   5   1   6 35924.9 1400.96   1
  -5   1  -6 38060.7 1362.47   3
   5  -1   6 38937.2 1790.18   2
  -5  -1  -6 36339.8 1725.34   2
   5  -1   7 38216.2 1702.79   4
   5   1   7 35316.3 1352.31   1
   5   1   7 36951.2 1607.15   4
   5  -1   7 35440.9 1395.65   1
  -5   1  -7 35112.0 1403.03   3
   5  -1   7 35859.8 1766.72   2
  -5  -1  -7 38698.9 1787.97   2
  -5  -1  -8 2040.78 389.949   2
   5  -1   8 2178.91 376.438   4
   5   1   8 1901.26 352.655   4
   5  -1   8 2355.25 283.278   1
  -5   1  -8 2458.38 346.236   3
  -5  -1  -8 1833.31 331.629   3
   5   1   8 1836.34 243.971   1
   5  -1   8 2390.14 441.570   2
   5  -1   9 5322.48 417.734   1
   5  -1   9 4347.40 392.879   1
   5  -1   9 4934.76 590.194   4
   5   1   9 4965.65 589.436   4
  -5   1  -9 5428.58 523.834   3
  -5  -1  -9 5655.59 609.920   3
   5  -1   9 4335.04 588.087   2
   5   1   9 4858.21 377.354   1
   5  -1  10 38279.9 1408.93   1
   5   1  10 45272.1 2016.48   4
  -5   1 -10 40702.4 1768.67   3
  -5  -1 -10 46555.6 1981.26   3
   5   1  10 38412.1 1290.61   1
   5  -1  10 42001.9 1422.13   1
   5  -1  10 42726.5 2001.25   4
   5  -1  11 6084.42 358.686   1
   5  -1  11 7426.77 795.366   4
   5  -1  11 6100.49 379.173   1
  -5   1 -11 6661.87 664.312   3
  -5  -1 -11 8126.19 792.757   3
   5   1  11 8353.62 833.491   4
   5   1  12 2596.22 499.033   4
  -5   1 -12 1685.54 382.148   3
  -5  -1 -12 2056.79 467.791   3
   5  -1  12 2468.84 494.707   4
  -5   1 -13 431.160 306.530   3
   5   1  13 481.328 288.261   4
   5  -1  13 550.537 340.287   4
  -5  -1 -13 865.396 333.810   3
   5  -1  14 4294.56 687.000   4
   5   1  14 4116.62 697.956   4
  -5   1 -14 2904.11 532.604   3
  -5  -1 -14 3865.78 646.978   3
   5  -1  15 13500.4 1290.15   4
  -5  -1 -15 12477.0 1158.94   3
  -5   1 -15 10838.9 1038.86   3
  -5   1 -16 6560.26 853.671   3
  -5  -1 -16 7495.79 952.172   3
   5  -1  17 20.9769 323.206   4
  -5   1 -17-70.3260 317.546   3
  -5  -1 -18-144.390 414.419   3
   5  -2 -19 1498.47 605.849   3
   5  -2 -18 7753.59 1128.62   3
   5  -2 -17-827.000 501.634   3
   5   2 -16 1135.20 271.912   1
   5  -2 -16 1297.85 490.460   3
   5  -2 -16 869.832 209.312   1
   5  -2 -15 853.912 445.463   3
   5   2 -15 842.341 254.003   1
   5  -2 -15 453.740 157.854   1
   5  -2 -14 14413.7 911.255   1
   5  -2 -14 14340.2 1286.90   3
   5   2 -14 13621.3 970.582   1
   5  -2 -13 332.677 157.357   1
   5  -2 -13 500.145 297.654   3
   5   2 -13 325.262 173.986   1
   5   2 -12 1969.81 348.508   4
   5  -2 -12 2067.85 350.805   1
   5   2 -12 2298.31 404.037   1
   5  -2 -12 2098.97 469.192   3
   5  -2 -11 1446.87 298.414   1
   5   2 -11 1624.73 338.601   1
   5   2 -11 1477.92 288.635   4
   5  -2 -11 509.542 267.857   3
   5   2 -10 21165.3 1229.10   1
   5   2 -10 22113.4 1120.92   4
   5  -2 -10 22890.5 1197.10   1
   5  -2 -10 21311.7 1337.05   3
   5   2  -9 1198.85 216.248   4
   5  -2  -9 948.410 256.845   1
   5  -2  -9 1245.60 341.356   3
   5   2  -9 1079.24 255.692   1
   5   2  -8 57079.4 2236.87   1
   5   2  -8 56717.4 1943.40   4
   5  -2  -8 56813.6 2243.99   3
   5   2  -7 2777.91 396.348   1
   5   2  -7 2463.15 275.525   4
   5   2  -6 42574.1 1656.81   1
   5   2  -6 45350.7 1324.68   4
   5   2  -5 39916.7 1691.08   1
   5  -2  -5 39996.9 1554.98   3
   5   2  -4 33359.0 1488.61   1
   5  -2  -4 34377.7 1320.70   3
  -5  -2   3 21.0134 70.7201   2
   5   2  -3-94.2223 119.926   1
   5  -2  -3 170.667 99.8917   3
  -5  -2   2 14183.9 759.408   2
   5   2  -2 15150.7 899.022   1
   5  -2  -2 15204.9 661.443   3
   5  -2  -1 101394. 2745.80   3
   5   2  -1 104554. 3261.55   1
  -5  -2   1 105467. 3123.77   2
  -5  -2   0 94251.6 3000.61   1
   5   2   0 95044.1 3017.04   1
   5   2   1 75.4909 56.5732   4
  -5  -2  -1-49.2669 95.6524   1
   5   2   1 168.857 107.837   1
   5   2   2 125.439 86.5757   4
   5   2   2 78.9391 84.8286   1
  -5  -2  -2 82.6550 88.6220   1
   5   2   3 19018.8 849.719   4
   5   2   3 18119.7 946.034   1
  -5  -2  -3 18878.7 959.655   1
   5   2   3 18703.9 926.383   3
   5   2   4 25816.6 1136.18   1
   5   2   4 24025.2 1031.87   4
  -5  -2  -4 24718.0 1104.35   1
  -5   2  -4 19895.1 708.939   3
   5   2   4 25076.7 1099.16   3
   5  -2   4 25856.5 1309.41   2
   5   2   5 17753.3 912.730   1
   5   2   5 19049.1 962.839   3
  -5   2  -5 15680.7 662.089   3
   5  -2   5 16986.9 1088.39   2
  -5  -2  -6 765.254 233.506   2
   5  -2   6 790.058 239.109   2
   5   2   6 699.828 205.847   3
  -5   2  -6 384.939 112.593   3
   5   2   6 843.292 195.057   1
   5  -2   7 7843.03 755.457   2
   5  -2   7 6780.49 577.757   1
   5   2   7 7748.96 644.442   4
   5   2   7 7717.89 663.459   3
  -5   2  -7 7257.48 502.621   3
  -5  -2  -7 7668.47 747.319   2
   5   2   7 7955.90 560.335   1
   5  -2   7 7376.22 681.353   4
   5  -2   8 28514.0 1321.63   1
   5  -2   8 33825.9 1652.40   4
   5   2   8 32512.8 1527.02   4
  -5   2  -8 29257.9 1267.52   3
   5   2   8 31416.4 1249.25   1
   5  -2   8 31077.2 1681.42   2
   5   2   9 24556.1 1005.42   1
   5  -2   9 20922.2 1060.31   1
   5   2   9 23911.3 1341.40   4
   5  -2   9 24016.0 1395.46   4
   5  -2   9 24607.1 1485.15   2
  -5   2  -9 21531.7 1113.18   3
   5  -2  10 10000.7 896.859   4
   5   2  10 11068.0 921.439   4
   5  -2  10 9435.85 604.021   1
   5   2  10 9996.44 525.988   1
  -5  -2 -10 11315.5 926.946   3
  -5   2 -10 8278.50 678.639   3
   5  -2  10 9419.97 912.436   2
   5  -2  10 8975.71 605.966   1
   5  -2  11 2509.28 470.347   4
   5   2  11 3192.88 509.709   4
  -5   2 -11 2380.16 400.334   3
   5  -2  11 2803.96 310.306   1
  -5  -2 -11 2882.48 521.779   3
   5  -2  11 2656.46 285.199   1
   5  -2  12 13303.8 1116.97   4
   5   2  12 13047.4 1101.29   4
  -5   2 -12 10370.6 856.163   3
   5  -2  12 10951.3 558.585   1
  -5  -2 -12 11508.1 1055.50   3
   5  -2  12 11039.0 539.919   1
   5  -2  13 6802.48 842.793   4
  -5   2 -13 5059.83 639.349   3
  -5  -2 -13 5965.56 777.038   3
   5  -2  14 10837.0 1100.19   4
  -5  -2 -14 11662.7 1128.18   3
   5  -2  15 291.691 361.299   4
  -5   2 -15 1000.25 407.032   3
  -5  -2 -15 164.820 285.516   3
   5  -2  16 2222.86 570.787   4
  -5   2 -16 805.087 326.333   3
  -5  -2 -16 1690.17 503.976   3
  -5  -2 -17 2251.58 607.950   3
   5  -2  17 4034.52 767.605   4
  -5  -2 -18 866.114 477.872   3
   5  -3 -19 2882.98 752.382   3
   5  -3 -18 950.501 378.496   3
   5  -3 -17 3020.13 682.236   3
   5  -3 -16 270.363 289.520   3
   5   3 -16 66.1580 142.991   1
   5   3 -15 7136.48 707.299   1
   5  -3 -15 7051.00 611.002   1
   5  -3 -15 7315.65 954.243   3
   5   3 -14 690.001 241.913   1
   5  -3 -14 659.245 208.717   1
   5  -3 -14 563.198 284.719   3
   5   3 -13 3439.00 495.282   1
   5  -3 -13 3703.83 636.046   3
  -5  -3  13 3416.10 479.462   1
   5  -3 -13 3638.02 457.229   1
   5   3 -12 5174.22 605.454   1
   5   3 -12 5291.54 564.649   4
  -5  -3  12 5384.23 603.250   1
   5  -3 -12 5384.40 726.665   3
   5  -3 -12 5667.81 568.835   1
   5   3 -11 3864.59 541.093   1
   5  -3 -11 4635.75 507.491   1
  -5  -3  11 4097.98 519.254   1
   5  -3 -11 3408.20 528.627   3
   5   3 -11 4517.26 475.517   4
  -5  -3  10 1682.22 340.950   1
   5   3 -10 1843.15 286.649   4
   5   3 -10 1429.85 331.730   1
   5  -3 -10 2219.80 432.024   3
   5   3  -9 679.246 257.736   1
   5   3  -9 588.128 172.638   4
   5  -3  -9 1056.41 303.398   3
   5   3  -8 16413.6 809.332   4
   5  -3  -8 17051.0 1076.67   3
   5   3  -8 17873.8 1118.55   1
   5   3  -7 14011.5 958.537   1
   5   3  -7 13002.9 650.736   4
  -5  -3   6 886.949 135.686   2
   5   3  -6 897.866 136.595   4
   5   3  -6 788.553 247.439   1
   5   3  -5 2889.39 223.859   4
   5  -3  -5 2689.52 352.126   3
   5   3  -5 2902.89 409.205   1
  -5  -3   5 3008.00 281.834   2
   5   3  -4 2621.49 177.849   4
   5  -3  -4 3133.22 362.418   3
   5   3  -4 2705.52 401.795   1
  -5  -3   4 2362.00 266.110   2
   5   3  -3 64997.8 2379.84   1
   5   3  -3 62192.4 1657.32   4
  -5  -3   3 67108.8 2088.80   2
   5  -3  -3 65478.5 2080.21   3
   5   3  -2 18597.4 1060.73   1
   5  -3  -2 18750.2 826.635   3
  -5  -3   2 19360.0 934.991   2
   5   3  -1 21407.7 1128.20   1
   5   3  -1 20376.4 612.269   4
  -5  -3   1 20117.0 1001.48   2
  -5  -3   0 1027.18 229.151   1
   5   3   0 1046.04 236.593   1
   5   3   0 1070.68 114.242   4
  -5  -3  -1 2878.42 363.537   1
   5   3   1 2941.60 223.910   4
   5   3   1 3019.36 386.907   1
   5   3   2 8129.46 631.688   1
   5   3   2 6840.90 413.595   4
  -5  -3  -2 7309.15 598.903   1
   5   3   3 13263.1 656.323   4
   5   3   3 13289.0 831.510   3
  -5  -3  -3 12101.9 786.287   1
   5   3   3 12351.1 808.749   1
   5   3   4 12.3348 93.2982   4
   5   3   4 56.3579 120.500   1
  -5  -3  -4 40.8251 106.221   1
   5   3   4 121.435 96.9660   3
  -5  -3  -5 5559.49 499.602   1
   5   3   5 5724.56 555.650   3
   5   3   5 5814.02 531.616   1
   5  -3   6 1714.80 359.186   2
   5   3   6 1840.85 322.967   3
   5  -3   6 1449.23 299.145   1
   5   3   6 1689.11 285.673   1
  -5  -3  -6 1654.49 259.661   4
  -5  -3  -6 2172.26 296.176   1
  -5  -3  -6 1660.74 348.012   2
  -5  -3  -7 9781.05 714.135   4
   5  -3   7 7383.60 642.726   1
   5  -3   7 8743.04 770.790   4
   5   3   7 8721.43 689.126   4
  -5   3  -7 8205.32 529.944   3
   5   3   7 8436.35 728.253   3
  -5  -3  -7 8510.36 599.682   1
   5   3   7 8960.53 642.377   1
  -5  -3  -7 8014.09 785.491   2
   5  -3   7 8071.55 791.570   2
   5  -3   8 2042.57 418.465   2
   5   3   8 3469.57 374.581   1
  -5  -3  -8 3489.41 444.839   4
   5  -3   8 2485.64 417.863   4
   5  -3   8 2426.47 355.336   1
   5   3   8 3843.28 486.816   4
  -5   3  -8 2014.45 289.540   3
   5   3   8 3545.62 492.429   3
   5  -3   9 1297.88 365.036   2
   5  -3   9 1574.66 379.212   4
   5   3   9 1264.94 297.688   4
   5   3   9 1610.83 354.844   3
  -5   3  -9 1382.95 281.112   3
   5  -3   9 944.934 218.300   1
   5   3   9 1583.88 249.564   1
   5   3  10 10324.8 595.334   1
   5  -3  10 10643.8 942.468   4
   5  -3  10 9134.36 682.826   1
  -5   3 -10 9019.72 705.456   3
   5  -3  10 10227.6 959.910   2
   5   3  11 3321.66 246.665   1
   5  -3  11 4175.93 613.895   4
  -5   3 -11 3238.46 432.498   3
   5  -3  11 4139.41 419.169   1
   5  -3  11 3787.93 636.530   2
   5  -3  12 6847.69 803.221   4
   5  -3  12 6929.55 507.585   1
  -5   3 -12 6548.22 671.979   3
   5  -3  12 6539.14 786.073   2
  -5   3 -13-163.864 216.668   3
   5  -3  13-241.646 268.272   4
   5  -3  14 1410.82 437.935   4
  -5   3 -14 922.719 275.918   3
   5  -3  15 2264.65 556.638   4
  -5   3 -15 1744.88 439.829   3
   5  -3  16 4809.39 789.112   4
   5  -4 -19 6729.79 1117.94   3
   5  -4 -18 816.691 486.594   3
   5  -4 -17 765.082 457.977   3
   5  -4 -16-882.563 458.062   3
   5   4 -16 372.443 226.402   1
   5  -4 -15 12944.7 874.197   1
   5   4 -15 12950.1 1041.01   1
   5  -4 -15 13946.5 1320.01   3
   5   4 -14 3701.35 542.008   1
   5  -4 -14 3722.95 557.828   1
  -5  -4  14 4103.19 550.878   1
   5  -4 -14 3299.49 439.664   1
   5  -4 -14 2842.30 588.930   3
   5  -4 -13 9066.76 990.155   3
   5  -4 -13 9161.26 852.097   1
  -5  -4  13 9976.59 868.645   1
   5  -4 -13 9241.12 754.724   1
   5   4 -13 8959.99 885.836   1
   5   4 -12 180.343 211.251   1
   5   4 -12 466.211 175.042   4
  -5  -4  12 187.431 129.712   1
  -5  -4  11 16530.0 1140.47   1
   5   4 -11 15769.6 932.919   4
   5  -4 -11 15409.6 1196.28   3
   5   4 -11 15908.4 1135.28   1
   5   4 -10 17176.7 921.631   4
   5  -4 -10 16405.5 1182.36   3
   5   4 -10 16318.6 1148.84   1
  -5  -4  10 17298.6 1155.72   1
   5   4  -9 15057.6 797.942   4
  -5  -4   9 14771.7 1039.81   1
   5   4  -9 14966.4 1064.98   1
   5  -4  -9 14736.5 1079.37   3
   5   4  -8 11401.0 634.597   4
   5   4  -8 11213.5 919.170   1
  -5  -4   8 12434.4 933.160   1
   5  -4  -8 12417.0 920.273   3
   5   4  -7 571.994 119.100   4
   5   4  -7 581.146 223.252   1
   5  -4  -7 481.749 227.454   3
  -5  -4   7 1033.71 257.647   1
  -5  -4   7 934.761 144.610   2
   5   4  -6 7161.63 387.929   4
  -5  -4   6 8078.44 715.136   1
   5   4  -6 6221.64 646.667   1
  -5  -4   6 6996.62 445.917   2
   5   4  -5 83631.7 2096.80   4
   5   4  -5 88516.9 2966.54   1
   5   4  -4 342.241 167.740   1
   5  -4  -4 103.525 150.699   3
   5  -4  -3 30409.4 1287.24   3
   5   4  -3 31235.0 1531.54   1
  -5   4   2 32368.2 1260.82   3
   5   4  -2 36842.5 1652.52   1
  -5   4   1 66465.9 1999.74   3
   5   4  -1 60686.5 2405.28   1
  -5  -4   0 61496.7 2310.13   1
  -5   4   0 60835.4 1845.56   3
   5   4   0 64516.1 2378.26   1
  -5   4  -1 7906.07 425.857   3
  -5  -4  -1 10028.0 739.912   1
   5   4   1 11067.2 796.517   1
   5   4   2 105.641 161.917   1
  -5   4  -2-28.1820 59.1608   3
  -5  -4  -2 31.2562 87.7862   1
  -5  -4  -3 16980.6 769.127   4
  -5  -4  -3 17194.2 1001.34   1
   5   4   3 16946.5 1029.26   1
  -5  -4  -4 829.417 164.843   4
   5   4   4 1075.13 255.039   1
   5   4   4 852.449 252.514   3
  -5  -4  -4 742.146 206.365   1
  -5  -4  -5 45122.5 1678.37   4
   5   4   5 44590.2 1951.31   3
   5   4   5 46034.2 1881.72   1
  -5  -4  -5 45952.8 1826.94   1
  -5  -4  -5 50522.6 2117.91   2
   5   4   6 3540.11 443.239   1
  -5  -4  -6 3362.04 376.975   4
  -5  -4  -6 2982.12 382.246   1
   5   4   6 3702.11 489.023   3
  -5  -4  -7 16250.7 943.344   1
  -5  -4  -7 16579.5 973.585   4
   5   4   7 18482.5 1170.16   3
   5  -4   7 17028.8 1149.74   4
   5   4   7 18319.7 1039.92   1
   5  -4   8 1858.79 411.902   2
   5  -4   8 1904.25 398.864   4
  -5  -4  -8 1611.31 269.003   1
   5   4   8 2175.18 407.104   3
  -5  -4  -8 1784.86 308.862   4
   5   4   8 2098.01 335.651   1
   5  -4   9 63070.6 2651.39   4
   5   4   9 65451.8 2280.66   1
   5  -4   9 58909.5 2676.94   2
   5  -4  10 173.742 185.997   2
   5  -4  10 35.4696 217.373   4
  -5   4 -10 133.209 172.806   3
   5   4  10-48.7465 115.068   1
   5  -4  11 2435.50 502.928   4
   5   4  11 2237.38 266.669   1
  -5   4 -11 1944.73 358.981   3
   5  -4  11 2185.53 348.636   1
   5  -4  11 2185.33 433.948   2
   5  -4  12 5087.67 711.947   4
  -5   4 -12 3663.52 504.363   3
   5  -4  12 4638.93 696.609   2
  -5   4 -13 29910.9 1642.02   3
   5  -4  13 30420.1 1883.52   2
   5  -4  14 3340.29 658.001   4
  -5   4 -14 2676.06 477.197   3
   5  -4  15 711.116 362.527   4
  -5   4 -15 384.903 278.860   3
   5  -4  16 17.1802 234.570   4
   5  -5 -18-387.686 376.169   3
   5  -5 -17 1336.82 551.353   3
   5  -5 -16 2941.80 656.494   3
   5   5 -16 2978.78 540.774   1
   5  -5 -15 138.915 141.846   1
   5  -5 -15-308.911 339.490   3
   5   5 -15 169.146 189.982   1
   5  -5 -14-58.6980 247.552   3
   5  -5 -14 171.481 161.968   1
   5   5 -14 99.3604 166.527   1
   5  -5 -13 4317.03 627.351   1
   5  -5 -13 4523.55 710.711   3
   5   5 -13 3532.77 600.490   1
   5   5 -12 6878.57 775.818   1
   5  -5 -12 7603.96 819.976   1
   5  -5 -12 7776.33 901.158   3
   5   5 -11 2005.58 446.262   1
  -5  -5  11 1510.80 363.775   1
   5  -5 -11 1883.91 400.214   1
   5  -5 -11 1233.41 384.562   3
   5   5 -10 2516.97 483.347   1
   5  -5 -10 1732.08 374.641   1
   5  -5 -10 2222.25 442.434   3
  -5  -5  10 2654.79 462.946   1
   5  -5  -9 16800.8 1200.61   1
   5  -5  -9 17661.8 1225.82   3
  -5  -5   9 18545.6 1234.80   1
   5   5  -9 19978.8 1323.42   1
  -5  -5   9 17458.4 648.052   2
  -5  -5   8 19053.5 1237.64   1
   5  -5  -8 20316.9 1257.28   3
   5   5  -8 18513.3 1260.52   1
  -5  -5   8 17371.2 743.350   2
   5   5  -7 2217.34 421.791   1
  -5  -5   7 2223.56 402.772   1
   5  -5  -7 1605.79 353.869   3
  -5  -5   6 31943.1 1646.06   1
   5   5  -6 30540.4 1640.20   1
  -5   5   5 8844.87 728.539   3
   5   5  -5 9630.00 844.361   1
  -5   5   4 7895.94 637.001   3
   5  -5  -4 8060.90 664.276   3
   5   5  -4 6695.30 690.935   1
   5   5  -3 2810.04 464.480   1
  -5   5   3 2327.39 328.370   3
  -5   5   2 49996.6 1807.75   3
   5   5  -2 47398.8 2087.63   1
   5   5  -1 2048.34 365.045   1
  -5   5   1 1927.98 272.647   3
   5   5   0 3241.85 457.675   1
  -5  -5   0 3356.81 448.031   1
  -5   5   0 3001.23 318.799   3
   5   5   1 378.596 223.107   1
  -5  -5  -1 847.595 242.445   1
  -5   5  -1 555.400 133.026   3
   5  -5   2 29049.0 1610.12   1
  -5  -5  -2 33142.5 1555.47   1
  -5  -5  -2 31946.5 1088.69   4
   5   5   2 33549.4 1613.67   1
   5  -5   3 7219.00 736.853   1
  -5  -5  -3 7982.56 479.480   4
  -5  -5  -3 8024.28 697.658   1
   5   5   3 8474.28 747.403   1
   5   5   4-69.8724 122.621   1
   5  -5   4 7.29563 132.502   1
  -5  -5  -4-69.9066 93.1513   4
   5   5   4 169.041 143.587   3
  -5  -5  -4-14.1637 115.088   1
  -5  -5  -5 6692.94 516.142   4
   5  -5   5 5702.41 654.579   1
  -5  -5  -5 6471.93 607.361   1
   5   5   5 7312.74 685.345   1
   5   5   5 6486.11 699.219   3
   5  -5   6 19760.3 1265.47   1
  -5  -5  -6 20722.7 1058.02   4
   5   5   6 20210.7 1223.35   1
   5   5   6 22937.1 1369.54   3
  -5  -5  -6 20681.3 1144.00   1
  -5  -5  -7 1513.59 292.127   1
   5  -5   7 1471.60 331.464   1
   5   5   7 2033.80 402.771   3
   5   5   7 2300.96 385.720   1
  -5  -5  -7 2130.76 336.536   4
  -5  -5  -8 3538.95 457.179   4
   5  -5   8 3683.88 539.599   4
  -5  -5  -8 3121.24 399.232   1
   5  -5   8 3228.76 477.298   1
   5   5   8 3465.37 463.572   1
   5  -5   9 335.597 256.734   4
   5   5   9 300.197 111.176   1
  -5  -5  -9 240.966 130.082   1
   5  -5   9 195.329 178.385   1
   5  -5  10 15517.0 1211.08   4
   5  -5  10 13784.6 1019.28   1
  -5  -5 -10 14697.5 828.056   1
   5   5  10 15865.1 950.882   1
   5  -5  10 13842.2 1192.60   2
   5  -5  11 257.713 238.609   2
   5  -5  11-156.934 239.694   4
   5   5  11-39.1883 104.361   1
   5  -5  11 81.8608 129.641   1
   5  -5  12 7652.72 890.262   4
   5  -5  12 6521.63 832.540   2
   5  -5  13 938.156 363.197   4
  -5   5 -13 645.658 268.050   3
   5  -5  13 713.821 377.382   2
   5  -5  14 749.148 367.483   4
  -5   5 -14 395.883 236.593   3
   5  -5  14 512.295 301.620   2
   5  -5  15-315.913 315.458   4
   5  -5  16 10013.6 1155.84   4
   5  -6 -18 1759.06 561.445   3
   5  -6 -17 668.299 470.735   3
   5   6 -16 226.249 184.318   1
   5  -6 -16 450.573 373.428   3
   5  -6 -15-200.611 336.154   3
   5   6 -15 157.230 187.784   1
   5   6 -14 9506.52 1001.34   1
   5  -6 -14 8991.43 1077.84   3
   5  -6 -13 2019.71 524.926   3
   5   6 -13 1738.97 421.570   1
   5  -6 -12 3922.22 609.630   1
   5  -6 -12 4298.99 680.948   3
   5   6 -12 4252.29 673.361   1
   5  -6 -11 893.996 307.621   1
   5  -6 -11 740.827 353.309   3
   5   6 -11 468.389 244.908   1
   5   6 -10 2814.53 544.377   1
   5  -6 -10 2755.42 528.386   1
   5  -6 -10 2479.75 471.030   3
  -5  -6  10 2076.50 198.537   2
   5   6  -9 5315.09 694.278   1
   5  -6  -9 4309.61 619.012   1
   5  -6  -9 5291.86 678.309   3
   5  -6  -8 4137.49 593.466   1
   5   6  -8 4391.91 651.419   1
   5  -6  -8 3954.15 564.609   3
   5   6  -7 3415.52 554.493   1
  -5  -6   7 3174.62 487.555   1
   5  -6  -7 3246.48 535.424   1
   5  -6  -7 3920.87 540.953   3
   5  -6  -6 33837.2 1854.63   1
  -5  -6   6 36734.6 1873.60   1
  -5   6   6 39583.4 1811.02   3
   5  -6  -6 39057.0 1859.54   3
   5   6  -6 33386.7 1851.92   1
   5   6  -5 392.849 249.593   1
  -5  -6   5 318.929 224.340   1
   5  -6  -5 316.432 205.178   1
  -5   6   5-37.1469 200.656   3
   5  -6  -4 56647.8 2547.64   1
  -5   6   4 63145.1 2321.95   3
   5   6  -4 57869.5 2523.79   1
   5  -6  -3 15013.7 1144.36   1
  -5   6   3 16263.5 974.807   3
   5   6  -3 15145.2 1120.55   1
  -5   6   2 14118.7 857.172   3
   5   6  -2 11857.4 984.653   1
  -5  -6   1 1731.76 356.113   1
   5   6  -1 2809.59 477.114   1
  -5   6   1 2043.25 312.031   3
  -5  -6   0 58128.7 2403.40   1
  -5   6   0 53870.5 1943.33   3
   5   6   0 54140.8 2364.87   1
   5   6   1 6542.88 706.840   1
   5  -6   1 7548.36 790.292   1
  -5  -6  -1 7679.36 727.232   1
  -5  -6  -1 6835.74 349.913   4
  -5   6  -1 6946.29 538.068   3
   5  -6   2 8793.34 874.426   1
  -5  -6  -2 10276.0 858.952   1
   5   6   2 9143.09 844.601   1
  -5  -6  -2 9605.75 491.506   4
   5   6   3 47.6280 168.839   1
  -5  -6  -3 224.146 165.296   1
   5  -6   3 106.440 138.327   1
  -5  -6  -3 144.954 88.1385   4
   5  -6   4 52433.8 2429.73   1
  -5  -6  -4 59255.6 1929.94   4
  -5  -6  -4 55151.6 2285.93   1
   5   6   4 57190.4 2442.11   1
   5   6   4 56345.6 2538.92   3
  -5  -6  -5 1340.99 302.090   1
   5  -6   5 941.213 304.852   1
   5   6   5 1449.23 370.560   3
   5   6   5 969.625 294.907   1
  -5  -6  -5 1280.37 232.406   4
  -5  -6  -6 751.903 250.192   1
  -5  -6  -6 941.263 212.058   4
   5  -6   6 648.954 261.205   1
   5   6   6 1127.35 295.071   1
  -5  -6  -7 5538.37 559.843   4
   5  -6   7 4432.40 612.949   1
  -5  -6  -7 5103.71 553.651   1
   5   6   7 5393.85 642.006   1
   5  -6   8 17459.7 1268.15   4
  -5  -6  -8 17374.1 1066.08   4
   5  -6   8 14715.1 1149.19   1
  -5  -6  -8 16508.6 1036.83   1
   5   6   8 18026.4 1185.02   1
  -5  -6  -9 5224.38 534.444   1
   5  -6   9 5266.54 700.673   4
   5   6   9 4979.77 585.775   1
   5  -6   9 5046.56 656.605   1
   5  -6  10 1466.02 438.120   2
   5  -6  10 1540.83 412.098   4
   5   6  10 1747.54 323.080   1
  -5  -6 -10 2065.07 339.473   1
   5  -6  10 1555.93 380.171   1
   5  -6  11 216.224 258.530   2
   5  -6  11 78.3293 207.832   4
   5   6  11 117.065 131.182   1
   5  -6  12 7376.89 945.220   2
   5  -6  12 9645.36 1010.19   4
   5  -6  13 369.219 274.337   4
   5  -6  13 686.739 375.850   2
   5  -6  14 2903.22 607.677   4
   5  -6  14 1582.84 464.506   2
   5  -6  15 220.043 243.058   4
   5  -6  15 128.361 263.870   2
   5  -7 -17 2776.22 765.972   3
   5   7 -16-201.715 273.691   1
   5  -7 -16 148.259 337.244   3
   5   7 -15 3041.18 563.800   1
   5  -7 -15 5070.02 850.433   3
   5   7 -14 2083.07 486.381   1
   5  -7 -14 1965.08 541.298   3
   5  -7 -13 10082.8 1129.22   3
   5   7 -13 8409.84 982.919   1
   5  -7 -12 958.289 391.400   3
   5   7 -12 1428.53 437.410   1
   5  -7 -11 24032.2 1660.18   3
   5   7 -11 23337.7 1650.89   1
   5  -7 -10 1444.40 409.218   3
   5   7 -10 1422.38 438.588   1
   5  -7  -9 2419.67 517.255   3
   5   7  -9 2735.73 572.033   1
   5  -7  -8-263.067 262.701   3
   5   7  -8-66.1985 261.387   1
   5   7  -7 81392.9 3387.60   1
   5   7  -6 2940.57 558.387   1
  -5   7   6 2670.66 459.927   3
   5   7  -5-19.2782 242.787   1
  -5   7   5 376.295 190.822   3
   5   7  -4 944.390 320.723   1
  -5   7   4 1125.03 287.260   3
  -5   7   3 81538.4 2846.20   3
   5   7  -3 71515.4 3078.57   1
   5   7  -2 215.047 222.655   1
  -5   7   2 654.587 214.344   3
  -5   7   1 9826.80 752.674   3
   5   7  -1 9836.76 939.112   1
  -5  -7   0 1371.47 331.946   1
   5   7   0 1378.79 374.373   1
  -5  -7   0 935.573 97.4821   4
  -5   7   0 858.217 229.271   3
  -5  -7  -1 60306.0 2562.92   1
  -5  -7  -1 58003.5 1661.33   4
   5   7   1 57056.4 2569.85   1
  -5   7  -1 53748.6 2094.33   3
  -5  -7  -2 5175.10 647.961   1
  -5  -7  -2 4971.03 342.997   4
   5   7   2 4687.92 648.401   1
  -5  -7  -3 34575.2 1788.65   1
  -5  -7  -3 32247.6 1222.94   4
   5   7   3 34257.3 1868.44   1
  -5  -7  -4 3082.09 483.498   1
  -5  -7  -4 2878.07 314.230   4
   5   7   4 3163.77 534.091   1
  -5  -7  -5 32387.8 1382.76   4
  -5  -7  -5 35148.8 1763.01   1
   5   7   5 35091.4 1890.38   1
  -5  -7  -6 1355.16 317.657   1
   5   7   6 2152.49 458.680   1
  -5  -7  -6 1730.61 293.027   4
  -5  -7  -7 11223.0 799.331   4
   5   7   7 11370.5 1003.48   1
  -5  -7  -7 10031.5 852.518   1
  -5  -7  -8 4713.18 565.542   1
   5   7   8 5147.00 666.605   1
   5   7   9 17645.8 1194.72   1
   5  -7   9 18792.4 1336.46   4
   5  -7  10 2953.22 569.105   4
   5   7  10 2747.06 484.467   1
   5   7  11 28483.2 1515.22   1
   5  -7  11 27403.7 1793.43   4
   5  -7  12 2097.64 529.293   2
   5  -7  12 1714.35 497.620   4
   5  -7  13-118.566 307.145   2
   5  -7  13-115.440 282.868   4
   5  -7  14 1228.68 421.008   4
   5  -7  14 975.286 412.369   2
   5  -7  15 16336.8 1509.10   4
   5   8 -16 1513.19 458.643   1
   5  -8 -16 1206.68 487.694   3
   5   8 -15-434.184 330.449   1
   5  -8 -15-89.1048 341.631   3
   5   8 -14 1927.54 509.373   1
   5  -8 -14 2013.91 563.736   3
   5   8 -13 1672.01 453.149   1
   5  -8 -13 2192.92 570.658   3
   5   8 -12 716.008 362.401   1
   5  -8 -12 672.741 379.016   3
   5   8 -11 1357.03 473.542   1
   5  -8 -11 967.601 365.411   3
   5   8 -10 616.739 305.596   1
   5   8  -9 7224.28 929.159   1
   5   8  -8 49.6222 255.926   1
   5   8  -7 1225.23 415.820   1
   5   8  -6 17785.4 1427.09   1
   5   8  -5 8727.69 955.455   1
  -5   8   4 25988.7 1479.43   3
   5   8  -4 21395.5 1584.36   1
  -5   8   3 5571.00 628.958   3
   5   8  -3 5402.77 746.295   1
  -5   8   2 2383.46 408.090   3
   5   8  -2 1599.79 411.079   1
   5   8  -1 1136.48 366.596   1
  -5   8   1 662.669 256.555   3
  -5  -8   0 9694.53 408.099   4
  -5   8   0 8637.61 747.719   3
   5   8   0 9951.82 1006.36   1
  -5  -8  -1 309.193 86.9330   4
  -5   8  -1 438.588 211.874   3
   5   8   1 603.956 335.513   1
  -5  -8  -2 3917.88 314.822   4
   5   8   2 3733.15 624.420   1
  -5  -8  -3 5303.78 411.462   4
   5   8   3 5322.03 738.051   1
  -5  -8  -4 22804.8 1040.70   4
   5   8   4 21785.0 1534.21   1
  -5  -8  -5 488.312 147.897   4
   5   8   5 473.309 270.629   1
  -5  -8  -6 606.448 185.666   4
   5   8   6 869.121 337.397   1
  -5  -8  -7 1067.40 268.513   4
   5   8   7 1137.03 379.519   1
   5   8   8 4813.74 682.855   1
   5  -8   9 424.352 339.737   4
   5   8   9 717.999 272.354   1
   5   8  10 346.650 228.727   1
   5  -8  10 442.901 262.201   4
   5  -8  11 473.545 306.704   4
   5   8  11 61.3913 164.392   1
   5  -8  12 1131.41 409.142   2
   5  -8  12 1407.23 485.793   4
   5  -8  13-653.759 392.451   2
   5  -8  13 414.030 388.461   4
   5  -8  14 1115.74 437.586   2
   5  -8  14 1244.54 482.890   4
   5   9 -16 1355.81 449.196   1
   5   9 -15 509.871 385.227   1
   5   9 -14-96.8320 213.421   1
   5   9 -13-141.164 274.714   1
   5   9 -12 19516.2 1647.03   1
   5   9 -11 366.080 300.189   1
   5   9 -10 1176.81 412.665   1
   5   9  -9 1352.96 469.919   1
   5   9  -8 15594.8 1427.33   1
   5   9  -7 8293.64 1035.29   1
  -5  -9   6 324.231 80.9193   4
   5   9  -6 186.634 237.671   1
  -5  -9   5 8611.17 369.121   4
   5   9  -5 8180.13 1009.38   1
   5   9  -4 5555.04 816.391   1
   5   9  -3 1434.12 389.063   1
   5   9  -2 22761.2 1687.29   1
  -5   9   2 24852.1 1474.46   3
  -5  -9   1 575.895 78.6521   4
  -5   9   1 615.604 242.102   3
   5   9  -1 502.980 313.577   1
  -5  -9   0 2465.67 203.332   4
  -5   9   0 2751.00 438.924   3
   5   9   0 2604.47 593.702   1
  -5  -9  -1 3552.40 282.776   4
   5   9   1 3402.70 633.635   1
  -5   9  -1 3660.79 536.147   3
  -5  -9  -2 27459.5 1064.21   4
   5   9   2 25309.3 1763.29   1
  -5  -9  -3 3969.33 366.846   4
   5   9   3 4899.83 762.490   1
  -5  -9  -4 524.981 147.396   4
   5   9   4 255.287 290.419   1
  -5  -9  -5 272.330 131.393   4
   5   9   5 149.794 206.784   1
   5   9   6 24253.8 1625.59   1
  -5  -9  -6 961.166 413.263   4
   5   9   7 768.615 347.191   1
   5   9   8 2877.83 578.146   1
   5  -9   9 1975.32 490.217   4
   5   9   9 1986.42 472.344   1
   5   9  10 15054.6 1284.81   1
   5  -9  10 16077.8 1359.20   4
   5  -9  11 903.770 354.931   4
   5  -9  12 2493.29 595.758   4
   5  -9  12 1790.27 558.068   2
   5  -9  13 905.952 445.990   2
   5  -9  13 1618.89 518.071   4
   5  10 -15 6034.78 950.763   1
   5  10 -14 458.114 291.852   1
   5  10 -13 4530.97 838.745   1
   5  10 -12 703.452 406.272   1
   5  10 -11 6791.54 1027.03   1
   5  10 -10 533.704 354.994   1
   5  10  -9 11840.9 1297.40   1
   5  10  -8 1304.88 407.127   1
  -5 -10   7 4568.59 337.662   4
   5  10  -7 3878.87 740.146   1
  -5 -10   6 17256.5 675.176   4
   5  10  -6 17775.9 1598.28   1
  -5 -10   5 24261.6 786.909   4
   5  10  -5 26795.4 1928.87   1
   5  10  -4 369.497 335.806   1
   5  10  -3 1772.20 502.517   1
  -5 -10   2 793.097 86.0433   4
   5  10  -2 592.486 319.256   1
   5  10  -1 18607.2 1551.63   1
  -5 -10   1 16611.0 617.209   4
  -5 -10   0 1209.49 157.269   4
   5  10   0 1344.92 484.879   1
  -5 -10  -1 1561.03 191.689   4
   5  10   1 1673.66 484.497   1
  -5  10  -1 1450.12 357.532   3
  -5 -10  -2 3541.37 330.768   4
   5  10   2 2848.37 575.782   1
  -5  10  -2 2080.00 426.946   3
   5  10   3 12955.9 1277.67   1
  -5 -10  -3 13752.6 754.206   4
   5  10   4 2978.93 656.712   1
   5  10   5 10003.2 1129.46   1
   5  10   6 5631.11 840.468   1
   5  10   7 1631.20 481.052   1
   5  10   8 238.838 219.936   1
   5  10   9 17432.1 1504.86   1
   5 -10   9 19011.5 1523.43   4
   5 -10  10-82.5986 319.832   4
   5  10  10 268.009 289.338   1
   5 -10  11 589.405 355.029   4
   5 -10  12-384.301 308.673   4
   5 -10  13 6618.33 1020.15   2
   5  11 -15 2801.89 671.460   1
   5  11 -14 134.586 265.989   1
   5  11 -13 841.570 346.393   1
   5  11 -12 1943.45 576.740   1
   5  11 -11 252.044 272.455   1
   5  11 -10 485.100 289.257   1
   5  11  -9 1679.72 567.128   1
   5  11  -8 30.8087 295.779   1
   5  11  -7 1141.97 495.727   1
   5  11  -6 29.5177 273.278   1
   5  11  -5 56.6544 260.097   1
   5  11  -4 3674.75 763.768   1
   5  11  -3 68.0182 284.749   1
   5  11  -2 1691.53 521.419   1
   5  11  -1 2725.93 655.156   1
   5  11   0 1270.88 456.470   1
   5  11   1 795.192 386.422   1
   5  11   2 4005.42 786.985   1
   5  11   3 4483.65 831.794   1
   5  11   4 1633.71 528.391   1
   5  11   5 1961.47 534.192   1
   5  11   6 207.764 387.005   1
   5  11   7 14548.9 1454.92   1
   5  11   8 259.968 279.046   1
   5 -11   9 250.740 297.611   4
   5  11   9 701.127 273.014   1
   5 -11  10 118.177 243.659   4
   5  11  10 285.196 309.167   1
   5 -11  11 96.0338 266.304   4
   5  12 -14 3832.08 873.116   1
   5  12 -13 110.447 395.354   1
   5  12 -12 148.083 353.229   1
   5  12 -11 328.133 341.615   1
   5  12 -10 9093.90 1241.48   1
   5  12  -9 3128.81 748.822   1
   5  12  -8 4716.36 923.978   1
   5  12  -7 849.251 473.998   1
   5  12  -6 6268.58 1041.18   1
   5  12  -5 39.5820 283.351   1
   5  12  -4 4712.62 877.716   1
   5  12  -3 422.212 343.235   1
   5  12  -2 7885.62 1096.13   1
   5  12  -1 3403.61 757.821   1
   5  12   0 20088.6 1793.60   1
   5  12   1 1604.86 595.845   1
   5  12   2 1065.40 460.458   1
   5  12   3 1759.54 593.727   1
   5  12   4 33494.5 2408.14   1
   5  12   5 179.165 299.097   1
   5  12   6 737.882 433.514   1
   5  12   7 676.365 438.757   1
   5  12   8 2438.25 644.427   1
   5  12   9 1062.61 504.073   1
   5 -12   9 1473.12 434.543   4
   5 -12  10 1874.54 487.777   4
   5  13 -11 1053.38 470.917   1
   5  13 -10 6022.01 1084.94   1
   5  13  -9 577.887 452.781   1
   5  13  -8-65.2844 341.880   1
   5  13  -7 5607.89 1019.86   1
   5  13  -6 5768.28 1043.88   1
   5  13  -5-172.085 371.618   1
   5  13  -4-306.181 410.991   1
   5  13  -3 17862.7 1757.07   1
   5  13  -2 3717.74 820.304   1
   5  13  -1 3192.96 772.363   1
   5  13   0 1711.30 608.979   1
   5  13   1 7242.60 1123.11   1
   5  13   2 1868.49 631.427   1
   5  13   3 4152.50 902.834   1
   5  13   4 58.5969 350.149   1
   5  13   5 5078.66 976.760   1
   5  13   6 351.621 386.378   1
   5  13   7 11208.1 1407.68   1
   5  13   8 872.099 437.449   1
   5  14  -6 462.970 345.931   1
   5  14  -5 3015.53 794.384   1
   5  14  -4-471.373 419.941   1
   5  14  -3 1057.88 572.389   1
   5  14  -2 900.478 435.267   1
   5  14  -1 4752.20 973.109   1
   5  14   0 301.878 357.693   1
   5  14   1 2550.90 763.128   1
   5  14   2 485.185 460.418   1
   5  14   3 3356.51 786.294   1
   5  14   4-47.2587 296.971   1
   5  14   5 3927.95 936.117   1
   5  14   6 1371.75 640.483   1
   5  14   7 9.31817 391.352   1
   6   0 -19-79.5669 375.190   3
   6   0 -18 399.332 378.623   3
   6   0 -17 240.960 336.784   3
   6   0 -16 461.650 231.623   1
   6   0 -15 103.811 142.110   1
   6   0 -14 1080.98 295.871   1
   6   0 -13-5.76916 122.941   1
   6   0 -12 280.198 190.911   1
   6   0 -11-17.3154 29.5161   2
   6   0 -11 30.1854 130.490   4
   6   0 -11 36.6874 144.732   1
   6   0 -10 17077.5 1096.08   1
   6   0  -9 49.4099 132.083   1
   6   0  -8 6962.80 662.868   1
   6   0  -7 96.4820 161.591   1
   6   0  -6 28305.2 1433.87   1
   6   0  -5-71.0767 185.908   1
   6   0  -4 7914.08 675.085   1
   6   0  -3 67.4283 108.965   2
   6   0  -3-36.3397 115.089   1
   6   0  -2 3369.38 382.433   2
   6   0  -2 3098.64 412.450   1
   6   0  -1-43.6354 123.101   2
   6   0  -1 121.077 118.581   1
   6   0   0 27146.2 1310.45   1
   6   0   0 26761.2 1291.01   2
   6   0   1 27.6636 133.119   2
   6   0   1 86.8443 125.560   1
   6   0   2 5711.69 530.555   1
   6   0   2 4763.26 302.484   3
   6   0   2 6087.58 598.083   2
   6   0   3 28.7048 110.640   1
   6   0   3 84.8419 70.9213   3
   6   0   3 216.207 190.953   2
   6   0   4 4014.39 428.970   1
   6   0   4 4500.43 549.104   2
   6   0   5 121.804 149.247   4
   6   0   5-68.2311 119.910   1
   6   0   5 115.179 166.128   2
   6   0   6 23665.8 1243.65   4
   6   0   6 22896.7 1366.74   2
   6   0   6 20809.6 1089.98   1
   6   0   7-9.11785 129.261   1
   6   0   7 34.1064 132.675   4
   6   0   8 28927.0 1510.46   4
   6   0   8 28307.0 1259.16   1
   6   0   9 51.3604 161.991   4
   6   0   9 71.5348 98.1856   1
  -6   0  -9-185.378 181.425   3
   6   0  10 1182.14 203.628   1
   6   0  10 1124.49 199.940   1
   6   0  10 1582.94 385.262   4
  -6   0 -10 1357.73 332.250   3
   6   0  11-51.9034 60.6236   1
   6   0  11 118.142 211.467   4
   6   0  11-44.0287 66.2083   1
  -6   0 -11 142.966 200.004   3
   6   0  12 10973.4 1046.31   4
  -6   0 -12 10389.6 924.862   3
   6   0  13 206.897 268.019   4
  -6   0 -13-477.516 326.581   3
   6   0  14 175.346 238.256   4
  -6   0 -14-211.964 244.490   3
  -6   0 -15-430.461 336.084   3
   6   0  15-297.782 316.295   4
   6   0  16 202.248 358.305   4
  -6   0 -16-120.737 307.195   3
   6   1 -19 211.371 597.329   3
   6  -1 -19-88.7559 435.915   3
   6  -1 -18 2730.77 742.234   3
   6  -1 -17 767.771 508.416   3
   6  -1 -16 7134.88 659.227   1
   6  -1 -16 7471.08 1000.12   3
   6   1 -16 7227.63 695.452   1
   6  -1 -15 3586.23 474.936   1
   6   1 -15 4305.35 545.287   1
   6  -1 -15 3240.34 665.783   3
   6  -1 -14 19999.2 1157.75   1
   6  -1 -14 22291.1 1622.23   3
   6   1 -14 19938.0 1216.04   1
   6   1 -13 12339.9 945.964   1
   6  -1 -13 11281.3 879.833   1
   6   1 -12 8941.76 793.612   1
   6  -1 -12 8302.26 738.816   1
   6   1 -11 5410.44 599.905   1
   6  -1 -11 5182.42 582.263   1
   6   1 -11 5506.34 559.051   4
   6   1 -10 479.982 170.249   1
   6   1 -10 998.458 245.745   4
   6  -1 -10 875.683 264.479   1
   6  -1  -9 19854.4 1183.66   1
   6   1  -9 21170.3 1228.13   1
   6  -1  -8 22681.4 1230.80   1
   6   1  -8 20560.7 1208.34   1
   6   1  -8 18897.8 723.137   2
   6  -1  -7 6434.34 627.974   1
   6   1  -7 6890.91 661.341   1
   6   1  -7 6655.34 406.407   2
   6  -1  -6 641.540 196.023   1
   6   1  -6 1060.83 257.403   1
   6   1  -6 978.442 163.639   2
   6   1  -5 369.603 176.566   1
   6  -1  -5 248.171 132.748   1
   6   1  -5 451.112 141.927   2
   6   1  -4 80949.7 2818.51   1
   6   1  -4 77456.3 2456.13   2
   6   1  -3 108344. 3529.62   1
   6   1  -3 108065. 3255.99   2
   6   1  -2 15010.5 965.053   1
   6   1  -2 14620.3 842.893   2
   6   1  -1 12005.3 773.913   2
   6   1  -1 11448.4 811.947   1
   6   1   0 27219.1 1305.18   2
   6   1   0 26523.0 1314.70   1
   6  -1   1 47411.6 1967.28   2
   6   1   1 52018.0 2022.51   2
   6   1   1 51383.6 1988.67   1
   6   1   2 24401.4 1219.89   1
   6   1   2 24309.0 1290.04   2
   6  -1   2 22006.1 1232.86   2
   6  -1   3 5041.10 567.112   2
   6   1   3 4928.82 429.333   4
   6   1   3 4144.57 367.581   3
   6   1   3 5331.85 514.950   1
   6   1   3 4172.48 519.152   2
   6   1   4 13753.7 727.549   3
   6   1   4 14221.5 869.005   1
   6  -1   4 14182.9 1010.21   2
   6  -1   5 18599.2 1057.34   4
   6   1   5 18304.5 901.369   3
   6   1   5 17412.6 973.726   1
   6  -1   5 16429.2 956.327   1
   6  -1   5 17892.2 1175.08   2
  -6  -1  -5 16253.8 1100.72   2
   6  -1   6 36387.4 1659.66   4
   6   1   6 36954.8 1597.52   4
   6  -1   6 35117.4 1499.60   1
   6   1   6 35004.3 1487.08   1
   6  -1   6 37567.9 1853.81   2
  -6  -1  -6 37689.2 1816.62   2
   6  -1   7 5651.78 500.264   1
   6   1   7 4613.09 449.489   1
   6  -1   7 5402.48 591.894   4
   6   1   7 4800.01 527.887   4
  -6   1  -7 5267.53 442.297   3
   6  -1   7 6081.50 704.956   2
   6  -1   8 212.677 135.464   1
   6   1   8 116.864 97.6791   1
   6  -1   8 92.8786 150.819   4
   6   1   8-35.1836 139.100   4
  -6   1  -8 339.842 164.157   3
   6   1   9 17374.1 863.556   1
   6  -1   9 12414.3 808.223   1
   6  -1   9 17045.0 1159.16   4
   6   1   9 16149.2 1111.88   4
  -6   1  -9 14891.8 910.578   3
   6  -1   9 16541.6 1243.74   2
   6  -1   9 16959.5 893.996   1
   6  -1  10 1834.47 263.254   1
   6  -1  10 2458.94 483.489   4
   6   1  10 1686.38 386.897   4
   6   1  10 1926.39 245.628   1
  -6   1 -10 1606.19 311.353   3
   6  -1  10 1918.62 278.454   1
   6   1  11 3277.20 271.852   1
   6  -1  11 4531.50 638.791   4
   6   1  11 4197.36 630.500   4
   6  -1  11 3944.42 347.924   1
   6   1  11 3483.65 278.633   1
  -6   1 -11 3721.38 493.476   3
   6  -1  11 4026.00 360.514   1
   6  -1  12 5909.10 354.365   1
   6   1  12 8043.95 885.613   4
   6  -1  12 8742.01 907.616   4
  -6   1 -12 6408.33 681.633   3
  -6  -1 -12 8278.32 830.740   3
   6  -1  13 3122.67 582.183   4
   6   1  13 2444.37 523.715   4
  -6   1 -13 1861.85 401.790   3
  -6  -1 -13 2252.23 519.728   3
   6  -1  14 12669.1 1229.89   4
   6   1  14 13129.8 1242.58   4
  -6   1 -14 9721.02 938.522   3
  -6  -1 -14 10368.2 1052.95   3
  -6   1 -15 8070.23 886.321   3
  -6  -1 -15 8106.27 937.803   3
   6  -1  16 1651.73 504.035   4
  -6  -1 -16 554.918 344.300   3
   6  -2 -19 4206.86 863.594   3
   6  -2 -18 186.877 342.138   3
   6  -2 -17 97.7041 302.978   3
   6   2 -16-81.5369 167.406   1
   6  -2 -16-16.0092 145.202   1
   6   2 -15 5578.79 633.837   1
   6  -2 -15 5490.55 584.526   1
   6  -2 -15 4235.45 794.055   3
   6  -2 -14 4475.24 749.946   3
   6   2 -14 4501.13 598.774   1
   6  -2 -14 5032.70 576.765   1
   6  -2 -13 201.325 135.579   1
   6   2 -13 499.560 215.599   1
   6  -2 -13 304.102 268.445   3
   6   2 -12 3103.06 434.321   4
   6  -2 -12 3368.84 586.146   3
   6  -2 -12 3318.03 461.048   1
   6   2 -12 3585.58 537.148   1
   6   2 -11 11712.1 963.310   1
   6  -2 -11 12958.0 943.308   1
   6   2 -11 12654.5 854.420   4
   6  -2 -11 12158.5 1050.09   3
   6   2 -10 16509.3 1138.69   1
   6   2 -10 17237.6 974.762   4
   6  -2 -10 17869.0 1224.51   3
   6  -2 -10 17246.2 1096.88   1
   6   2  -9 10414.0 868.048   1
   6   2  -9 10783.4 704.270   4
   6  -2  -9 10294.3 811.752   1
   6  -2  -9 10202.9 879.220   3
  -6  -2   9 10739.7 840.745   1
  -6  -2   8 92.0973 135.230   1
   6   2  -8 18.6689 84.6073   4
   6  -2  -8 40.8679 164.829   3
   6   2  -8 11.7562 172.177   1
   6   2  -7 23350.4 1296.87   1
   6   2  -6 11563.8 870.310   1
   6   2  -5 22082.5 1230.54   1
   6  -2  -5 20988.3 1065.89   3
   6   2  -4 12652.0 905.184   1
   6  -2  -4 13096.7 740.151   3
   6   2  -3 47061.9 1951.51   1
   6  -2  -3 46438.9 1590.73   3
  -6  -2   2 2526.43 324.427   2
   6  -2  -2 2599.19 253.957   3
   6   2  -2 2478.02 375.621   1
   6   2  -1 51588.7 2023.56   1
   6  -2  -1 47596.8 1454.78   3
  -6  -2   1 52813.5 1899.06   2
  -6  -2   0 10842.4 768.368   1
   6   2   0 10891.2 789.399   1
   6   2   1-97.8989 99.5743   4
  -6  -2  -1-29.4401 86.4864   1
   6   2   1 124.370 131.003   1
   6   2   2 17476.9 802.843   4
   6   2   2 17123.4 1004.58   1
  -6  -2  -2 16903.3 978.220   1
   6   2   3 27588.2 1136.49   4
   6   2   3 26544.7 1291.85   1
   6   2   3 27113.8 1207.66   3
   6   2   4 32469.8 1374.02   1
   6   2   4 33000.4 1305.58   3
   6  -2   4 33869.5 1607.44   2
   6   2   5 9630.10 712.220   1
   6   2   5 9818.45 691.601   3
  -6  -2  -5 10101.0 838.246   2
   6  -2   5 9449.73 854.530   2
   6  -2   6 1346.01 327.608   2
  -6  -2  -6 1857.06 385.771   2
   6  -2   6 1377.83 343.782   4
   6   2   6 1656.16 297.898   4
   6   2   6 1373.77 276.694   3
  -6   2  -6 1472.50 182.293   3
   6   2   6 1656.67 296.434   1
   6  -2   7 7721.78 799.549   2
   6   2   7 7408.06 597.025   1
   6   2   7 7646.84 665.594   4
   6   2   7 7930.49 694.880   3
  -6   2  -7 7610.98 495.658   3
   6  -2   7 8055.11 741.149   4
   6  -2   8 33675.2 1582.77   1
   6  -2   8 41554.1 1933.11   4
   6   2   8 40516.6 1802.56   4
  -6   2  -8 38411.1 1478.45   3
   6  -2   8 38344.5 1983.99   2
   6   2   8 38735.8 1575.27   1
   6  -2   9 1925.80 306.977   1
   6  -2   9 1648.07 414.272   4
   6   2   9 2119.57 293.608   1
   6   2   9 2023.67 387.865   4
  -6   2  -9 1266.70 254.176   3
   6  -2   9 1421.33 258.990   1
   6  -2   9 1499.17 368.801   2
   6   2  10 207.735 129.578   1
   6  -2  10 238.985 215.512   4
   6  -2  10 264.181 157.247   1
   6   2  10-35.3287 207.486   4
   6  -2  10-5.88266 105.185   1
  -6   2 -10 59.6283 140.742   3
   6  -2  10 329.092 310.821   2
   6  -2  11 6785.83 527.507   1
   6  -2  11 7655.21 836.802   4
   6   2  11 7238.05 437.645   1
   6   2  11 7982.22 846.776   4
   6  -2  11 6550.19 520.882   1
  -6   2 -11 6111.13 607.719   3
   6  -2  12 18492.7 1382.20   4
   6   2  12 18885.7 1388.83   4
  -6   2 -12 14585.6 1058.16   3
   6  -2  12 16534.3 805.402   1
   6  -2  13 3252.65 599.454   4
  -6   2 -13 2341.27 425.875   3
   6  -2  14 1548.21 452.125   4
  -6   2 -14 599.618 276.331   3
   6  -2  15 1255.64 392.811   4
   6  -2  16 3540.11 693.811   4
   6  -3 -19 28.9275 371.020   3
   6  -3 -18-83.8487 390.555   3
   6  -3 -17 1067.07 443.800   3
   6   3 -16 5995.28 693.131   1
   6  -3 -16 6122.09 879.516   3
   6  -3 -16 5369.44 563.659   1
   6  -3 -15 4406.14 530.330   1
   6   3 -15 4705.89 604.547   1
   6  -3 -15 4464.22 812.356   3
   6  -3 -14 60.3599 135.956   1
   6   3 -14 32.6124 190.002   1
   6  -3 -14-358.099 321.134   3
   6  -3 -13 553.240 220.052   1
   6   3 -13 636.709 252.997   1
   6  -3 -13 578.590 370.748   3
   6  -3 -12 6802.12 817.539   3
   6   3 -12 7448.10 656.052   4
   6  -3 -12 7478.13 705.049   1
   6   3 -12 6498.11 727.705   1
  -6  -3  12 7053.60 728.511   1
   6  -3 -11 3892.81 503.005   1
   6   3 -11 4474.88 465.523   4
  -6  -3  11 4434.49 564.705   1
   6   3 -11 3634.36 552.778   1
   6  -3 -11 3787.57 592.801   3
   6   3 -10 436.814 160.412   4
   6  -3 -10 166.219 221.736   3
   6   3 -10 770.839 268.099   1
  -6  -3  10 685.729 229.916   1
   6   3  -9 13135.7 1016.63   1
  -6  -3   9 13009.4 981.340   1
   6   3  -9 12408.6 736.906   4
   6  -3  -9 14623.6 1048.71   3
  -6  -3   8 5581.75 619.922   1
   6  -3  -8 5358.79 598.382   3
   6   3  -8 5766.34 665.838   1
   6   3  -8 5515.98 428.571   4
   6   3  -7 2198.63 243.053   4
  -6  -3   7 1792.84 343.577   1
   6   3  -7 2190.62 407.868   1
   6   3  -6 3612.08 301.622   4
  -6  -3   6 3569.94 486.009   1
   6   3  -6 5078.26 608.305   1
   6   3  -5 590.095 241.005   1
  -6  -3   5 1036.84 195.984   2
   6   3  -5 827.109 127.400   4
   6  -3  -5 866.202 228.203   3
   6   3  -4 7711.29 710.138   1
   6  -3  -4 7280.25 556.371   3
  -6  -3   4 7587.20 547.520   2
   6   3  -3 5513.85 598.672   1
   6  -3  -3 5249.36 436.754   3
  -6  -3   3 5353.38 473.786   2
   6   3  -2 5120.05 568.856   1
   6  -3  -2 6175.43 422.196   3
  -6  -3   2 5049.99 483.122   2
   6   3  -1 2509.99 406.552   1
   6   3  -1 2290.93 169.253   4
  -6  -3   1 1940.10 297.376   2
  -6  -3   0 12845.6 875.979   1
   6   3   0 12631.6 888.963   1
   6   3   0 13129.7 541.026   4
  -6  -3  -1 19175.0 1095.67   1
   6   3   1 18902.6 1109.18   1
   6   3   1 18647.9 747.123   4
  -6  -3  -2 9354.76 723.760   1
   6   3   2 9982.77 764.643   1
   6   3   2 9485.06 529.484   4
   6   3   3 12985.8 891.372   1
  -6  -3  -3 12889.3 860.630   1
   6   3   3 12578.9 690.103   4
   6   3   3 13131.6 865.005   3
   6   3   4 36115.6 1619.85   1
  -6  -3  -4 35014.6 1569.31   1
   6   3   4 37141.2 1600.36   3
   6   3   4 36560.0 1416.52   4
  -6  -3  -5 60.5576 146.768   2
   6   3   5 329.520 200.246   1
   6   3   5 327.787 179.244   3
  -6   3  -5 108.007 44.5499   3
  -6  -3  -5 169.778 125.171   1
   6   3   6 9725.70 711.019   4
   6   3   6 9430.87 771.229   3
  -6   3  -6 8183.03 443.353   3
   6   3   6 9574.45 734.094   1
   6  -3   6 10267.2 920.245   2
   6  -3   7 1367.62 372.345   2
   6  -3   7 1779.56 379.879   4
   6   3   7 1978.38 325.276   1
   6   3   7 2158.44 388.173   3
  -6   3  -7 1315.44 198.508   3
   6   3   7 2210.46 366.135   4
   6  -3   8 527.099 224.374   2
   6   3   8 165.144 141.791   1
   6  -3   8 82.8571 220.824   4
   6   3   8 215.066 135.518   4
   6   3   8 130.098 146.030   3
  -6   3  -8 372.350 115.517   3
   6  -3   9 9125.37 938.845   2
  -6   3  -9 7756.94 590.701   3
   6   3   9 8787.54 800.470   4
   6  -3   9 8585.47 870.007   4
   6   3   9 8733.23 644.762   1
   6  -3  10 5888.07 576.034   1
   6  -3  10 7311.11 816.702   4
   6   3  10 7164.70 746.555   4
   6   3  10 7071.67 543.386   1
  -6   3 -10 5383.62 512.773   3
   6  -3  10 6083.61 804.717   2
   6   3  11 3479.07 328.548   1
   6  -3  11 3655.60 589.526   4
   6  -3  11 3499.38 424.479   1
  -6   3 -11 2949.42 413.853   3
   6  -3  11 2501.96 543.408   2
   6  -3  12 780.991 329.228   4
   6  -3  12 386.343 138.467   1
  -6   3 -12 306.204 197.607   3
   6  -3  12 357.115 261.972   2
   6  -3  13 794.860 289.110   4
  -6   3 -13 572.947 251.484   3
   6  -3  14 1428.74 419.314   4
  -6   3 -14 1492.58 368.181   3
   6  -3  15 495.446 347.457   4
   6  -3  16 143.490 295.634   4
   6  -4 -18 782.571 487.040   3
   6  -4 -17-429.933 442.262   3
   6  -4 -16 5830.07 928.987   3
   6  -4 -16 6628.66 655.622   1
   6   4 -16 7797.38 816.836   1
   6   4 -15 6450.11 753.523   1
   6  -4 -15 5532.44 851.247   3
   6  -4 -15 5928.92 645.177   1
   6  -4 -14 17437.5 1142.42   1
   6  -4 -14 17476.1 1446.59   3
   6   4 -14 19047.0 1337.06   1
   6   4 -13 192.445 159.052   1
   6  -4 -13 196.853 263.132   3
   6  -4 -13 421.057 197.934   1
   6   4 -12 4276.31 638.264   1
   6   4 -12 4755.87 511.716   4
   6  -4 -12 4908.07 707.828   3
  -6  -4  11 9463.49 883.532   1
   6   4 -11 9435.33 684.650   4
   6   4 -11 8632.29 860.222   1
   6  -4 -11 7904.35 852.903   3
  -6  -4  10 56177.0 2420.21   1
   6   4 -10 53468.9 1944.90   4
   6  -4 -10 52366.3 2388.28   3
   6   4 -10 55398.1 2461.86   1
   6   4  -9 3472.44 356.705   4
   6   4  -9 3024.34 496.406   1
  -6  -4   9 3457.49 532.079   1
   6  -4  -9 3287.85 507.213   3
   6   4  -8 2333.93 264.716   4
  -6  -4   8 2571.06 439.089   1
   6   4  -8 2461.63 453.362   1
   6  -4  -8 2078.17 386.865   3
   6   4  -7 26156.8 988.194   4
   6  -4  -7 27183.3 1429.23   3
  -6  -4   7 26842.8 1497.89   1
  -6  -4   7 27764.1 1050.88   2
   6   4  -7 26655.4 1553.30   1
   6   4  -6 42780.0 1336.05   4
  -6  -4   6 46177.7 2028.03   1
  -6  -4   6 44662.5 1560.89   2
   6   4  -6 43054.6 2044.52   1
   6   4  -5 3220.14 199.518   4
   6   4  -5 2997.01 482.291   1
  -6  -4   5 2891.56 328.759   2
   6  -4  -4 27943.7 1275.88   3
  -6  -4   4 27223.2 1219.35   2
   6   4  -4 26805.4 1485.73   1
   6  -4  -3 8131.54 591.599   3
  -6  -4   3 8086.76 626.948   2
   6   4  -3 8009.99 748.440   1
  -6  -4   2 8474.89 1228.39   2
   6   4  -2 70973.6 2357.86   1
  -6  -4   1 12767.8 912.800   1
   6   4  -1 12302.9 932.812   1
  -6  -4   0 32278.1 1557.28   1
   6   4   0 30495.9 1562.45   1
  -6  -4  -1-84.8945 109.144   1
   6   4   1 96.6471 62.5565   4
   6   4   1-109.269 161.096   1
  -6  -4  -1 123.138 139.062   2
   6   4   2 55164.0 1727.76   4
  -6  -4  -2 53935.5 2179.00   1
   6   4   2 54999.9 2251.69   1
   6   4   3 11033.6 619.262   4
   6   4   3 11529.7 868.662   1
  -6  -4  -3 10353.1 799.731   1
   6   4   4 67118.6 2219.02   4
   6   4   4 67967.7 2606.83   3
   6   4   4 67911.6 2570.55   1
  -6  -4  -4 69190.8 2705.37   2
  -6  -4  -4 67253.6 2509.39   1
   6  -4   5 1902.27 357.532   1
   6   4   5 2686.51 395.477   1
   6   4   5 2023.80 369.796   3
  -6  -4  -5 2235.66 369.211   1
   6  -4   6 13695.9 1002.47   1
  -6  -4  -6 14476.9 924.215   1
  -6   4  -6 11970.5 575.682   3
   6   4   6 14997.8 1038.22   3
   6   4   6 15123.2 977.309   1
   6  -4   7 15049.1 1125.36   4
   6  -4   7 14022.8 1014.57   1
  -6  -4  -7 14293.0 902.767   1
  -6   4  -7 12096.5 643.494   3
   6   4   7 15776.1 1103.34   3
   6   4   7 14457.1 958.328   1
   6  -4   7 15004.9 1163.64   2
   6  -4   8 61916.7 2521.01   4
   6   4   8 65265.1 2524.58   3
   6   4   8 64573.7 2248.65   1
   6  -4   8 57173.3 2581.16   2
   6  -4   9 1277.81 359.441   2
   6  -4   9 1436.38 397.697   4
  -6   4  -9 1193.59 223.231   3
   6   4   9 1316.60 270.095   1
   6  -4  10 144.529 205.549   2
   6  -4  10 247.793 205.855   4
  -6   4 -10 85.4109 137.868   3
   6   4  10 134.784 110.114   1
   6  -4  11 332.285 261.261   4
   6   4  11 69.2942 96.6162   1
  -6   4 -11 120.461 150.608   3
   6  -4  11 60.7472 248.505   2
  -6   4 -12 8231.21 736.967   3
   6  -4  12 8774.47 1011.73   2
  -6   4 -13 3100.66 489.025   3
   6  -4  13 3484.14 684.351   2
   6  -4  14 675.688 333.767   4
   6  -4  15 795.828 380.136   4
   6  -5 -18 1569.73 574.751   3
   6  -5 -17 1489.08 513.767   3
   6  -5 -16 247.125 358.203   3
   6   5 -16-125.551 182.671   1
   6  -5 -15 14.2979 313.448   3
   6  -5 -15 369.322 205.232   1
   6   5 -15 182.269 192.871   1
   6   5 -14 2379.37 476.321   1
   6  -5 -14 2155.61 526.803   3
   6  -5 -14 3167.39 491.391   1
   6  -5 -13 16696.2 1385.92   3
   6   5 -13 16600.6 1309.44   1
   6   5 -12 301.754 226.461   1
   6   5 -12 13.8782 122.550   4
   6  -5 -12 301.850 287.330   3
   6  -5 -11 16023.6 1259.21   3
   6   5 -11 15563.6 1252.16   1
   6   5 -11 15971.4 913.797   4
   6   5 -10 3229.13 354.125   4
   6   5 -10 2937.84 533.273   1
   6  -5 -10 2132.29 443.461   3
   6   5  -9 7901.61 846.164   1
   6  -5  -9 9156.04 875.149   3
  -6  -5   8 1145.34 182.602   2
   6   5  -8 1337.32 363.944   1
   6  -5  -8 1316.49 376.118   3
   6  -5  -7 25929.9 1438.37   3
  -6  -5   7 24010.4 1462.17   1
   6   5  -7 22912.4 1459.75   1
  -6  -5   7 23339.2 1022.21   2
   6   5  -6-146.996 218.024   1
   6  -5  -6 2.83232 146.815   3
  -6  -5   6-153.468 180.333   1
  -6  -5   6 142.649 114.715   2
   6   5  -5 858.672 264.957   1
  -6  -5   5 1200.02 313.478   1
  -6  -5   5 597.594 166.465   2
   6  -5  -4 15057.5 939.539   3
   6   5  -4 24131.5 1404.94   1
   6   5  -3 12752.1 1006.36   1
  -6   5   2 7087.05 533.058   3
   6   5  -2 7731.93 762.481   1
  -6   5   1 14245.2 741.878   3
  -6  -5   1 14616.8 1038.77   1
   6   5  -1 14670.2 1058.17   1
   6   5   0-13.6262 207.081   1
  -6   5   0 172.297 102.150   3
  -6  -5   0 78.8141 100.628   1
  -6   5  -1 29358.7 1076.07   3
  -6  -5  -1 32338.6 1605.42   1
   6   5   1 31759.6 1628.25   1
   6  -5   2-54.2148 181.445   1
   6   5   2 59.5473 143.127   1
  -6   5  -2-53.9351 68.2004   3
  -6  -5  -2 100.233 125.255   1
   6  -5   3 3449.99 522.375   1
   6   5   3 2517.87 420.495   1
  -6   5  -3 2200.41 212.571   3
  -6  -5  -3 2887.44 432.004   1
  -6  -5  -4 2365.55 388.694   1
   6   5   4 2910.60 450.408   1
   6  -5   4 1339.80 330.692   1
   6   5   4 2224.08 419.600   3
   6  -5   5 51454.8 2387.33   1
   6   5   5 58811.5 2485.14   3
   6   5   5 58586.3 2385.45   1
  -6  -5  -5 57955.1 2294.20   1
   6   5   6 450.863 236.530   1
  -6  -5  -6 312.339 134.921   4
   6  -5   6 449.379 188.683   1
  -6  -5  -6 534.180 187.849   1
   6   5   6 504.697 259.289   3
   6   5   7 4333.48 553.247   1
  -6  -5  -7 4206.67 476.565   4
   6  -5   7 3177.76 502.515   1
  -6  -5  -7 3777.92 477.055   1
   6  -5   8 173.823 266.577   2
   6  -5   8 10.4684 228.004   4
  -6  -5  -8 99.2130 104.248   1
   6  -5   8 219.505 162.850   1
   6   5   8 258.039 183.510   1
   6  -5   9 19417.5 1379.79   4
   6  -5   9 14835.5 1103.76   1
  -6  -5  -9 16460.1 986.411   1
   6   5   9 19122.8 1154.84   1
   6  -5   9 16641.9 1352.35   2
   6  -5  10 1500.38 402.904   4
   6  -5  10 1714.79 464.414   2
  -6   5 -10 713.252 197.926   3
   6  -5  10 1287.54 310.799   1
   6   5  10 1295.36 272.232   1
   6  -5  11 3036.54 620.712   2
   6  -5  11 3430.30 629.423   4
   6   5  11 3030.40 378.423   1
  -6   5 -11 2260.25 352.156   3
   6  -5  12-284.720 235.209   4
  -6   5 -12 98.0411 190.999   3
   6  -5  12 338.577 259.829   2
   6  -5  13 4984.11 794.680   4
   6  -5  13 3298.38 651.099   2
   6  -5  14-169.034 277.349   4
   6  -5  14 719.086 401.713   2
   6  -5  15 5655.52 889.369   4
   6  -6 -18 394.146 411.733   3
   6  -6 -17-628.691 572.204   3
   6  -6 -16-290.771 359.421   3
   6   6 -16-0.98590 205.071   1
   6  -6 -15 3728.79 743.590   3
   6   6 -15 3630.19 640.389   1
   6  -6 -14 301.237 314.045   3
   6   6 -14 541.092 264.308   1
   6  -6 -13 329.407 283.359   3
   6   6 -13 1108.81 372.562   1
   6   6 -12 530.898 304.308   1
   6  -6 -12 524.841 327.647   3
   6   6 -11 1360.81 404.519   1
   6  -6 -11 2174.53 496.096   3
   6   6 -10 4095.18 664.179   1
   6  -6 -10 3181.87 564.976   3
  -6  -6  10 3397.99 250.274   2
   6   6  -9 4544.60 677.453   1
   6  -6  -9 4996.98 674.175   3
  -6  -6   9 5176.89 392.145   2
   6   6  -8 1379.44 361.658   1
   6  -6  -8 1578.15 436.470   3
  -6  -6   8 1897.68 259.370   2
   6   6  -7 3897.62 612.085   1
   6  -6  -7 5217.43 646.118   3
   6   6  -6 3762.36 604.383   1
   6  -6  -6 3555.40 526.683   3
   6   6  -5 10800.5 987.382   1
   6   6  -4 4458.11 638.990   1
  -6   6   4 5310.68 558.888   3
  -6   6   3 15628.5 947.342   3
   6   6  -3 15350.4 1163.43   1
   6  -6  -2 4242.19 611.830   1
   6   6  -2 5490.85 690.351   1
  -6  -6   2 4932.33 626.764   1
  -6   6   2 5150.40 497.617   3
   6   6  -1 6527.30 729.131   1
  -6   6   1 6879.80 548.635   3
  -6  -6   1 7752.08 776.871   1
   6  -6  -1 5763.64 718.045   1
   6   6   0 4404.37 604.631   1
   6  -6   0 4501.64 610.390   1
  -6  -6   0 4900.56 608.869   1
  -6   6   0 4208.37 405.454   3
   6  -6   1 6651.49 760.698   1
   6   6   1 7239.87 761.318   1
  -6  -6  -1 7052.99 727.744   1
  -6   6  -1 5826.44 456.179   3
   6  -6   2 17306.1 1281.32   1
  -6  -6  -2 20518.4 1286.39   1
  -6   6  -2 17548.1 844.670   3
   6   6   2 21654.7 1350.78   1
   6  -6   3 48080.9 2359.25   1
  -6  -6  -3 55845.8 2337.38   1
   6   6   3 52411.8 2354.94   1
   6   6   4 702.203 269.365   1
  -6  -6  -4 1209.40 203.989   4
   6  -6   4 1242.84 316.181   1
  -6  -6  -4 990.421 272.518   1
   6   6   4 550.453 263.818   3
   6   6   5 6784.52 732.509   1
  -6  -6  -5 6250.85 512.779   4
  -6  -6  -5 6354.40 674.633   1
  -6  -6  -6 2676.83 443.384   1
  -6  -6  -6 3783.11 419.622   4
   6   6   6 3268.44 520.912   1
  -6  -6  -7 17623.6 1036.11   4
   6   6   7 19193.1 1290.24   1
  -6  -6  -7 16136.9 1098.31   1
  -6  -6  -8 3396.82 473.290   1
   6   6   8 3950.34 569.827   1
   6  -6   8 3967.54 642.490   4
   6  -6   9 5599.11 769.357   4
   6   6   9 6346.25 682.626   1
  -6  -6  -9 5790.94 594.119   1
   6  -6  10 535.810 387.783   2
   6  -6  10 739.942 306.245   4
   6   6  10 357.751 204.539   1
   6  -6  11 5228.62 799.144   2
   6  -6  11 7389.68 919.435   4
   6   6  11 5892.85 612.036   1
   6  -6  12 1129.63 436.300   2
   6  -6  12 1124.45 412.592   4
   6  -6  13 6676.16 917.707   4
   6  -6  13 6038.99 905.662   2
   6  -6  14 889.603 393.396   4
   6  -6  14 784.676 410.111   2
   6  -6  15 1503.49 501.473   4
   6  -6  15-20.5331 317.631   2
   6  -7 -17 571.779 473.697   3
   6   7 -16 7161.96 916.826   1
   6  -7 -16 5848.87 971.314   3
   6   7 -15 1815.81 489.832   1
   6  -7 -15 938.884 427.240   3
   6  -7 -14 4871.31 843.811   3
   6   7 -14 3809.81 698.797   1
   6  -7 -13 318.424 329.299   3
   6   7 -13 61.8049 285.565   1
   6  -7 -12 9826.09 1092.14   3
   6   7 -12 9049.56 1057.59   1
   6   7 -11 12416.7 1210.09   1
   6  -7 -11 12785.5 1200.82   3
   6   7 -10 3875.53 666.888   1
   6  -7 -10 4664.58 736.921   3
  -6  -7  10 4388.07 367.834   2
   6   7  -9 1997.69 477.624   1
   6  -7  -9 2865.76 541.152   3
   6   7  -8 29623.2 1901.36   1
   6  -7  -8 36748.2 1950.18   3
   6   7  -7 1778.97 440.809   1
   6   7  -6-199.215 315.727   1
  -6   7   6-4.06735 200.304   3
   6   7  -5 298.638 269.313   1
  -6   7   5-62.1249 128.167   3
  -6   7   4 82610.4 2911.40   3
   6   7  -4 71974.0 3158.69   1
   6   7  -3 4574.51 668.626   1
  -6   7   3 4389.79 541.683   3
  -6   7   2 17745.2 1074.71   3
   6   7  -2 18759.0 1355.43   1
   6   7  -1 3055.33 578.961   1
  -6   7   1 2808.07 395.156   3
  -6   7   0 28241.8 1294.30   3
   6   7   0 26763.0 1653.23   1
  -6   7  -1 6865.57 565.365   3
   6   7   1 9098.14 901.618   1
  -6   7  -2 38878.2 1564.42   3
   6   7   2 43061.5 2171.12   1
   6   7   3 4603.47 677.660   1
  -6  -7  -3 4762.95 366.881   4
  -6  -7  -4 13383.6 730.983   4
   6   7   4 14658.5 1183.52   1
  -6  -7  -5 5942.74 506.672   4
   6   7   5 7215.34 827.878   1
   6   7   6 51451.4 2435.95   1
  -6  -7  -6 48461.1 1885.98   4
  -6  -7  -7 12153.0 842.317   4
   6   7   7 12555.6 1109.80   1
   6   7   8 53.0541 219.718   1
   6  -7   9 3729.62 620.277   4
   6   7   9 3650.64 584.606   1
   6   7  10 27097.5 1583.44   1
   6  -7  10 28159.3 1834.89   4
   6  -7  10 23972.8 1790.22   2
   6  -7  11 221.007 269.721   2
   6  -7  11 430.156 278.247   4
   6   7  11-121.818 195.116   1
   6  -7  12 330.067 263.551   2
   6  -7  12 926.604 404.350   4
   6  -7  13 651.132 468.061   2
   6  -7  13 442.149 314.611   4
   6  -7  14 9374.85 1135.69   4
   6  -7  14 7176.39 1061.43   2
   6   8 -16 515.766 318.845   1
   6  -8 -16-310.964 401.150   3
   6   8 -15 8286.35 1039.45   1
   6  -8 -15 8533.06 1165.94   3
   6   8 -14 271.880 257.716   1
   6  -8 -14 36.7457 392.740   3
   6   8 -13-135.097 305.608   1
   6  -8 -13 797.643 452.341   3
   6  -8 -12 1144.06 437.010   3
   6   8 -12 1113.86 440.061   1
   6  -8 -11 5576.39 846.911   3
   6   8 -11 3877.57 739.315   1
   6   8 -10 5382.92 828.019   1
   6   8  -9 8061.78 1000.26   1
   6   8  -8 767.933 363.648   1
   6   8  -7 293.154 223.739   1
   6   8  -6 950.338 367.886   1
   6   8  -5 534.534 353.177   1
  -6   8   5 485.358 234.302   3
   6   8  -4-291.953 292.476   1
  -6   8   4-38.2429 126.518   3
   6   8  -3 6844.78 851.532   1
  -6   8   3 8090.54 776.155   3
   6   8  -2 513.558 287.420   1
  -6   8   2 696.819 241.963   3
  -6   8   1 19313.3 1151.64   3
   6   8  -1 20284.0 1502.70   1
  -6   8   0 121.668 138.822   3
   6   8   0-38.9603 239.695   1
  -6   8  -1 7377.24 643.915   3
   6   8   1 8478.88 958.211   1
  -6  -8  -2 126.390 60.9323   4
  -6   8  -2 275.961 188.651   3
   6   8   2 229.280 277.342   1
  -6  -8  -3 26008.5 1043.37   4
   6   8   3 25752.2 1733.25   1
  -6  -8  -4 1038.57 191.314   4
   6   8   4 1065.11 390.766   1
  -6  -8  -5 6092.15 514.105   4
   6   8   5 6960.89 856.778   1
  -6  -8  -6 1499.38 264.716   4
   6   8   6 1791.08 473.527   1
   6   8   7 6446.53 821.736   1
   6   8   8 4080.05 627.559   1
   6  -8   9 726.104 387.066   4
   6   8   9 595.335 313.744   1
   6  -8  10 4744.69 763.765   4
   6   8  10 4182.08 628.897   1
   6  -8  11 1165.62 474.199   2
   6  -8  11 1469.97 454.519   4
   6  -8  12 945.099 407.789   2
   6  -8  12 457.012 399.814   4
   6  -8  13 4411.08 786.866   2
   6  -8  13 6474.43 953.232   4
   6  -8  14-302.078 335.290   2
   6   9 -16 224.304 244.372   1
   6   9 -15 212.546 225.704   1
   6   9 -14 150.846 299.525   1
   6   9 -13 11068.3 1264.40   1
   6   9 -12 434.841 263.406   1
   6   9 -11 3252.03 692.152   1
   6   9 -10 488.446 316.230   1
   6   9  -9 17593.5 1560.39   1
   6   9  -8 56.6451 318.905   1
   6   9  -7 14377.9 1398.18   1
   6   9  -6 972.995 388.625   1
   6   9  -5 796.638 335.706   1
   6   9  -4 3704.76 683.648   1
   6   9  -3 31392.4 2056.90   1
  -6   9   3 33912.4 1774.75   3
  -6   9   2 5131.21 617.782   3
   6   9  -2 5702.97 839.085   1
  -6   9   1 5604.36 632.618   3
   6   9  -1 5878.36 826.467   1
  -6   9   0 3965.55 515.431   3
   6   9   0 5636.75 827.803   1
  -6   9  -1 55138.7 2325.22   3
  -6  -9  -1 59914.5 1673.67   4
  -6  -9  -2 286.832 89.5150   4
  -6   9  -2 19.1822 171.460   3
   6   9   2 420.191 337.307   1
  -6  -9  -3 1820.35 229.060   4
   6   9   3 1164.53 393.194   1
  -6   9  -3 1026.50 263.570   3
  -6  -9  -4 276.358 108.390   4
   6   9   4 138.675 264.434   1
   6   9   5 15911.4 1390.67   1
   6   9   6 1020.89 409.277   1
   6   9   7 1441.45 410.675   1
   6   9   8 1378.52 432.842   1
   6  -9   9 19761.0 1579.25   4
   6   9   9 17487.9 1447.23   1
   6  -9  10 1038.76 398.069   4
   6   9  10 865.391 345.626   1
   6  -9  11 13646.9 1348.86   4
   6  -9  12 341.393 331.284   2
   6  -9  12 730.220 389.287   4
   6  -9  13 3015.84 718.777   2
   6  10 -16 2091.26 538.884   1
   6  10 -15-161.770 262.531   1
   6  10 -14 9441.91 1233.83   1
   6  10 -13 1607.11 503.110   1
   6  10 -12 3795.30 786.597   1
   6  10 -11 2037.41 514.331   1
   6  10 -10 16710.5 1621.46   1
   6  10  -9 1422.26 523.909   1
   6  10  -8 3047.94 691.076   1
   6  10  -7 307.739 284.220   1
   6  10  -6 47565.8 2766.92   1
   6  10  -5 24755.3 1888.70   1
   6  10  -4 3535.91 721.521   1
   6  10  -3-92.0728 283.354   1
   6  10  -2 28209.1 1995.72   1
   6  10  -1 1536.48 505.487   1
   6  10   0 6741.23 937.647   1
   6  10   1 2208.15 549.614   1
   6  10   2 9160.77 1103.40   1
   6  10   3 564.094 328.141   1
   6  10   4 10140.2 1152.47   1
   6  10   5 573.387 247.425   1
   6  10   6 6765.91 943.538   1
   6  10   7 4440.19 798.208   1
   6  10   8 17608.7 1533.44   1
   6 -10   9-355.041 380.024   4
   6  10   9 222.851 222.084   1
   6 -10  10-355.978 340.275   4
   6 -10  11 171.887 270.655   4
   6 -10  12 7532.51 1080.76   2
   6 -10  13 547.050 387.685   2
   6  11 -15 372.315 340.244   1
   6  11 -14-77.6749 313.670   1
   6  11 -13 612.736 418.114   1
   6  11 -12 936.985 439.651   1
   6  11 -11 55.7592 384.080   1
   6  11 -10-34.9183 298.762   1
   6  11  -9 1838.99 607.564   1
   6  11  -8 5083.24 952.346   1
   6  11  -7 537.664 397.529   1
   6  11  -6 4378.91 839.679   1
   6  11  -5-10.9566 277.723   1
   6  11  -4 9659.94 1224.19   1
   6  11  -3 244.402 318.142   1
   6  11  -2-304.826 359.782   1
   6  11  -1 3870.46 808.615   1
   6  11   0 6509.25 977.234   1
   6  11   1 389.967 376.081   1
   6  11   2 8629.95 1115.30   1
   6  11   3-365.551 389.075   1
   6  11   4 3259.62 731.606   1
   6  11   5 805.369 435.318   1
   6  11   6 83.0206 289.947   1
   6  11   7-143.614 235.421   1
   6  11   8 7426.01 1024.48   1
   6 -11   9 2484.32 610.869   4
   6  11   9 1744.52 461.030   1
   6 -11  10 2029.55 501.755   4
   6  12 -13 438.552 369.753   1
   6  12 -12-17.4097 314.366   1
   6  12 -11 9007.20 1277.00   1
   6  12 -10 657.471 432.611   1
   6  12  -9 4488.26 918.172   1
   6  12  -8-544.394 390.822   1
   6  12  -7 14024.1 1539.67   1
   6  12  -6 2888.20 782.563   1
   6  12  -5 10215.4 1300.95   1
   6  12  -4 560.395 365.687   1
   6  12  -3 2622.44 642.052   1
   6  12  -2 1328.21 477.457   1
   6  12  -1 22722.6 1953.64   1
   6  12   0 2533.95 694.595   1
   6  12   1 356.868 338.935   1
   6  12   2 68.0417 289.074   1
   6  12   3 19762.6 1799.66   1
   6  12   4 244.857 281.404   1
   6  12   5 717.431 422.812   1
   6  12   6 348.265 379.671   1
   6  12   7 9263.04 1228.60   1
   6  12   8 1670.28 535.086   1
   6 -12   9 4933.07 821.529   4
   6  12   9 5735.34 929.844   1
   6  13  -9 1786.98 635.505   1
   6  13  -8 10929.4 1443.14   1
   6  13  -7 254.945 309.387   1
   6  13  -6 395.863 363.107   1
   6  13  -5 1622.02 613.964   1
   6  13  -4 4694.22 942.104   1
   6  13  -3 1896.03 654.498   1
   6  13  -2 2236.89 619.746   1
   6  13  -1-241.400 382.853   1
   6  13   0 5151.99 958.334   1
   6  13   1-284.273 423.190   1
   6  13   2 6772.53 1128.39   1
   6  13   3 200.736 317.204   1
   6  13   4 823.464 493.995   1
   6  13   5 836.458 488.358   1
   6  13   6 7119.99 1148.16   1
   6  13   7 474.599 380.533   1
   6  13   8 902.510 446.783   1
   6  14  -3-275.374 412.457   1
   6  14  -2 2168.28 574.604   1
   6  14  -1 671.350 380.730   1
   6  14   0 2300.86 748.128   1
   6  14   1 1602.11 555.846   1
   6  14   2 986.888 386.649   1
   6  14   3-1.83057 375.411   1
   6  14   4 396.398 340.553   1
   6  14   5-188.070 426.768   1
   6  14   6 1039.65 407.029   1
   7   0 -19-626.836 468.251   3
   7   0 -18 112.169 372.441   3
   7   0 -17-467.583 415.800   3
   7   0 -16-147.810 195.943   1
   7   0 -15 2470.82 432.513   1
   7   0 -14-418.961 226.800   1
   7   0 -13 53.7521 147.306   1
   7   0 -12 141.070 201.597   1
   7   0 -11 19504.1 1245.11   1
   7   0 -11 16558.6 656.859   2
   7   0 -10-22.3713 61.4646   2
   7   0 -10 74.4467 139.155   1
   7   0  -9-42.8866 90.4501   2
   7   0  -9 4.58632 146.752   1
   7   0  -8-111.510 90.5638   2
   7   0  -8 71.5706 167.831   1
   7   0  -7 45322.3 1615.45   2
   7   0  -7 44967.0 2023.88   1
   7   0  -6-116.256 122.173   2
   7   0  -6-18.2094 152.720   1
   7   0  -5 25.0445 107.723   2
   7   0  -5 204.805 185.987   1
   7   0  -4-45.5349 118.636   2
   7   0  -4 43.2970 176.260   1
   7   0  -3 4066.84 451.928   2
   7   0  -3 3945.32 484.908   1
   7   0  -2-172.651 171.436   2
   7   0  -2-181.742 194.683   1
   7   0  -1 50611.1 2089.09   1
   7   0  -1 51256.7 2023.66   2
   7   0   0 13.5575 128.723   2
   7   0   0 24.3915 130.153   1
   7   0   1 70838.1 2622.89   1
   7   0   1 72473.1 2689.72   2
   7   0   2 8.34491 161.776   2
   7   0   2 157.417 143.927   1
   7   0   2 48.7358 51.8190   3
   7   0   3 6849.91 634.324   1
   7   0   3 6301.66 381.658   3
   7   0   3 7314.33 729.799   2
   7   0   4 222.211 163.616   4
   7   0   4 93.2653 122.658   1
   7   0   4 7.47524 240.515   2
   7   0   5 13804.4 913.374   1
   7   0   5 14065.1 922.924   4
   7   0   5 13614.5 1062.25   2
   7   0   6 101.772 124.086   1
   7   0   6-126.086 183.846   4
   7   0   6-37.5228 204.890   2
   7   0   7 28974.6 1514.12   4
   7   0   7 29578.1 1404.11   1
   7   0   8-129.238 174.971   4
   7   0   8 177.729 151.189   1
   7   0   9 17251.6 974.883   1
   7   0   9 16647.4 1185.06   4
   7   0  10-2.70512 100.562   1
   7   0  10-195.936 258.309   4
   7   0  11 24775.1 1102.01   1
   7   0  11 28773.3 1706.87   4
   7   0  12-157.569 184.057   4
   7   0  13 6621.06 858.142   4
   7   0  14 428.467 368.737   4
   7   0  15 2691.24 600.753   4
   7   0  16 118.406 306.274   4
   7   1 -19 262.950 478.773   3
   7  -1 -19 1329.23 632.593   3
   7  -1 -18 2573.12 762.272   3
   7  -1 -17 10539.2 1300.99   3
   7  -1 -16 84.5885 123.430   1
   7   1 -16 524.757 248.864   1
   7  -1 -15 4596.90 570.705   1
   7  -1 -15 3948.82 731.830   3
   7   1 -15 4583.09 618.467   1
   7  -1 -14 1628.25 503.226   3
   7  -1 -14 1376.71 343.340   1
   7   1 -14 1920.98 406.114   1
   7   1 -13 8403.27 826.469   1
   7  -1 -13 8333.47 802.192   1
   7   1 -12 8150.00 795.692   1
   7  -1 -12 8204.28 791.431   1
   7  -1 -11 151.531 159.556   1
   7   1 -11-156.862 173.325   1
   7   1 -11-88.5717 145.268   4
   7   1 -10 7267.54 749.366   1
   7  -1 -10 6551.49 700.368   1
   7  -1  -9 12339.9 976.082   1
   7   1  -9 13069.1 1008.50   1
   7  -1  -8 5532.93 629.270   1
   7   1  -8 6690.36 695.176   1
   7   1  -8 5365.03 384.149   2
   7  -1  -7 3031.14 475.548   1
   7   1  -7 3602.47 512.518   1
   7   1  -7 2895.09 307.748   2
   7   1  -6 2843.28 453.990   1
   7  -1  -6 2596.48 410.482   1
   7   1  -6 3170.75 339.479   2
   7  -1  -5 52029.3 2158.64   1
   7   1  -5 51785.7 2182.04   1
   7   1  -5 50175.5 1829.34   2
   7  -1  -4 96000.5 3331.79   1
   7   1  -4 99234.8 3403.81   1
   7   1  -4 96772.7 3055.65   2
   7  -1  -3 27517.6 1434.11   1
   7   1  -3 28571.7 1479.15   1
   7   1  -3 28541.9 1308.01   2
   7  -1  -2 24586.9 1339.01   1
   7   1  -2 26831.0 1417.37   1
   7   1  -2 27037.9 1301.15   2
   7   1  -1 8889.38 730.658   2
   7   1  -1 10919.2 843.424   1
   7   1   0 84633.7 2888.13   2
   7   1   0 80557.2 2895.78   1
   7  -1   0 76824.2 2832.77   2
   7   1   1 55248.6 2198.89   1
   7   1   1 57192.3 2260.00   2
   7  -1   1 53200.1 2230.74   2
   7  -1   2 2280.17 408.425   2
   7   1   2 2037.69 361.453   1
   7   1   2 1577.11 335.565   2
   7  -1   2 2045.75 345.961   1
   7   1   3 7135.51 501.276   3
   7  -1   3 7690.19 676.658   1
   7   1   3 7013.84 656.510   1
   7   1   3 7801.75 757.392   2
   7  -1   3 8127.61 772.888   2
   7   1   4 29284.2 1190.31   3
   7  -1   4 26710.4 1361.91   1
   7   1   4 30100.2 1444.77   1
   7  -1   4 26734.0 1552.29   2
   7  -1   5 30527.9 1505.94   4
   7   1   5 29355.3 1403.64   4
   7  -1   5 28842.3 1419.41   1
   7   1   5 31550.4 1300.58   3
   7   1   5 29225.4 1449.45   1
   7  -1   5 29565.5 1677.54   2
   7  -1   6 4751.18 560.578   4
   7   1   6 5553.92 566.475   4
   7   1   6 4332.11 490.911   1
   7  -1   6 4916.07 509.336   1
   7  -1   6 4207.40 607.180   2
   7  -1   7-68.7138 224.148   4
   7  -1   7 14.3146 118.752   1
   7   1   7 45.7090 157.018   4
   7   1   7 135.996 131.868   1
   7  -1   7 249.863 290.751   2
   7  -1   8 9817.71 757.930   1
   7   1   8 10328.5 740.065   1
   7  -1   8 10794.4 916.953   4
   7   1   8 11204.8 897.383   4
   7  -1   8 11111.6 1043.43   2
   7   1   9 42821.3 2015.24   4
   7   1   9 40081.5 1666.77   1
   7  -1   9 40826.8 2188.62   2
   7  -1   9 40909.9 1710.02   1
   7  -1   9 43251.8 2077.60   4
   7  -1  10 3723.59 424.666   1
   7  -1  10 5057.73 665.614   4
   7   1  10 5270.93 660.839   4
   7   1  10 4168.22 431.325   1
   7  -1  10 4094.37 438.544   1
   7   1  11 309.594 110.151   1
   7  -1  11 416.476 298.800   4
   7  -1  11 474.250 159.257   1
  -7   1 -11 445.629 214.991   3
   7   1  11 671.150 310.501   4
   7  -1  12 6738.99 835.080   4
   7   1  12 7096.41 849.640   4
  -7   1 -12 5787.58 644.020   3
   7  -1  13 4284.58 694.706   4
   7   1  13 4555.21 709.298   4
  -7   1 -13 3879.49 565.986   3
   7  -1  14 7079.83 922.278   4
   7   1  14 7663.38 962.541   4
   7  -1  15 3254.25 690.016   4
   7   1  15 4427.28 770.936   4
   7  -1  16 1275.51 497.801   4
   7  -2 -19-348.048 465.916   3
   7  -2 -18 1.52721 367.704   3
   7   2 -17 866.272 259.692   1
   7  -2 -17 1043.96 481.549   3
   7  -2 -16 7131.15 713.778   1
   7   2 -16 6087.09 714.054   1
   7  -2 -16 7622.17 1046.45   3
   7  -2 -15 12556.0 979.522   1
   7  -2 -15 13202.0 1328.39   3
   7   2 -15 13000.1 1066.15   1
   7  -2 -14 7873.51 1000.94   3
   7  -2 -14 8576.64 814.562   1
   7   2 -14 9024.19 893.077   1
   7  -2 -13 134.169 168.544   1
   7  -2 -13 152.628 281.026   3
   7   2 -13-139.209 215.382   1
   7   2 -12 7195.30 655.000   4
   7  -2 -12 6842.97 833.190   3
   7  -2 -12 6488.83 722.841   1
   7   2 -12 6405.46 734.774   1
   7  -2 -11 6971.38 725.687   1
   7   2 -11 6178.72 576.243   4
   7  -2 -11 6068.05 747.326   3
   7   2 -11 5932.74 700.569   1
   7   2 -10 1972.04 416.266   1
   7   2 -10 1367.50 267.616   4
   7  -2 -10 1616.15 395.800   3
   7  -2 -10 1696.64 375.305   1
   7   2  -9 44.9813 143.403   1
   7   2  -9 129.714 94.4511   4
   7  -2  -9 77.7204 147.180   1
   7  -2  -9 312.394 242.839   3
   7   2  -8 13496.1 1030.40   1
   7  -2  -8 13305.0 984.610   3
   7  -2  -8 13712.3 1017.47   1
   7   2  -7 9327.80 829.201   1
  -7  -2   7 9507.54 818.865   1
   7   2  -6 11983.9 958.183   1
  -7  -2   6 12151.8 914.120   1
   7   2  -5 5349.73 628.338   1
   7   2  -4 42210.9 1974.47   1
   7  -2  -4 45552.7 1660.71   3
   7  -2  -3 27939.5 1132.43   3
   7   2  -3 28015.7 1495.71   1
   7   2  -2 66329.4 2543.74   1
   7  -2  -2 62353.6 1936.61   3
   7   2  -1 10345.2 827.040   1
   7  -2  -1 9563.70 458.317   3
  -7  -2   1 9605.89 774.361   1
  -7  -2   0 459.649 186.545   1
   7   2   0 482.241 191.040   1
   7   2   1 99.0160 87.1378   4
   7   2   1 103.537 181.741   1
   7   2   2 73027.1 2319.40   4
   7   2   2 73031.5 2699.08   1
   7   2   3 26803.5 1320.30   1
   7   2   3 25773.6 1150.08   3
   7  -2   3 29760.4 1524.99   2
   7   2   4 32525.8 1561.16   1
   7   2   4 34880.1 1464.69   3
   7  -2   4 35160.1 1813.22   2
  -7  -2  -4 35179.8 1760.26   2
   7  -2   5 140.549 221.177   2
   7   2   5 93.6635 121.933   1
   7   2   5 96.7813 144.619   4
   7   2   5-97.8244 123.991   3
   7   2   6 33457.0 1595.79   1
   7  -2   6 39331.4 1839.37   4
   7   2   6 36333.9 1616.46   4
   7   2   6 37724.4 1626.85   3
   7  -2   6 35520.6 1925.95   2
   7  -2   7 6562.50 788.245   2
   7   2   7 5194.22 566.364   4
   7   2   7 6294.65 637.490   3
   7   2   7 5365.21 553.923   1
   7  -2   7 6454.41 685.193   4
   7  -2   8 3710.36 536.015   4
   7   2   8 3248.93 489.836   4
   7   2   8 3002.56 400.758   1
   7  -2   8 2989.32 417.704   1
   7  -2   8 2818.75 500.628   2
   7   2   9 399.783 261.121   4
   7  -2   9 46.7689 173.770   4
   7   2   9-10.0641 120.508   1
  -7   2  -9 67.8954 128.770   3
   7  -2   9 31.6561 116.472   1
   7  -2   9 179.019 317.093   2
   7  -2  10 5970.07 565.632   1
   7   2  10 4875.07 460.669   1
   7  -2  10 4419.28 486.271   1
   7  -2  10 5068.06 694.975   4
   7   2  10 5210.23 660.017   4
  -7   2 -10 4247.85 456.421   3
   7  -2  10 5254.47 764.809   2
   7   2  11 3609.98 360.816   1
   7  -2  11 4008.73 440.040   1
   7  -2  11 4201.79 656.460   4
   7   2  11 4523.90 645.203   4
  -7   2 -11 4198.98 483.720   3
   7  -2  12 10146.6 1030.63   4
   7   2  12 9304.94 976.748   4
  -7   2 -12 8547.64 746.629   3
   7  -2  13 4785.05 734.878   4
   7   2  13 4245.97 700.990   4
   7  -2  14 4485.72 760.385   4
   7  -2  15 1777.78 530.227   4
   7  -3 -19 617.759 520.322   3
   7  -3 -18 752.279 541.570   3
   7   3 -17 1864.34 410.757   1
   7  -3 -17 2177.23 670.736   3
   7   3 -16 539.948 269.054   1
   7  -3 -16 156.443 399.920   3
   7  -3 -16 177.496 210.931   1
   7  -3 -15 3745.21 529.368   1
   7   3 -15 3661.67 601.535   1
   7  -3 -15 3119.92 709.035   3
   7  -3 -14 9346.62 1074.56   3
   7   3 -14 10478.2 995.398   1
   7  -3 -14 8907.86 845.539   1
   7  -3 -13 2125.81 426.123   1
   7   3 -13 2287.42 464.146   1
   7  -3 -13 1323.81 389.164   3
   7   3 -12 4355.37 501.393   4
   7   3 -12 3217.16 543.674   1
   7  -3 -12 2891.13 541.867   3
   7  -3 -12 3584.76 539.346   1
   7   3 -11 10.3287 113.858   4
   7  -3 -11 79.2043 218.837   3
   7   3 -11 372.625 245.123   1
   7  -3 -11 84.4787 183.697   1
   7   3 -10 16242.7 1204.36   1
   7   3 -10 15931.6 896.487   4
  -7  -3  10 15418.4 1128.00   1
   7  -3 -10 14460.7 1131.54   3
   7  -3 -10 15881.4 1131.93   1
  -7  -3   9 4537.32 587.888   1
   7   3  -9 4251.57 415.676   4
   7  -3  -9 3559.84 528.950   3
   7   3  -9 4025.81 602.363   1
   7   3  -8 1720.02 234.563   4
   7  -3  -8 2263.39 440.201   3
  -7  -3   8 2255.47 418.085   1
   7   3  -8 1226.57 323.875   1
   7   3  -7 2149.53 424.873   1
   7   3  -7 2264.22 249.838   4
  -7  -3   7 1889.10 371.124   1
   7  -3  -7 1862.41 365.245   3
  -7  -3   6-103.367 133.865   1
   7   3  -6 101.411 73.3269   4
   7   3  -5 37660.9 1862.34   1
   7  -3  -5 37486.0 1574.92   3
   7   3  -4 7110.30 726.653   1
   7  -3  -4 5765.57 505.566   3
  -7  -3   4 7171.68 572.720   2
  -7  -3   3 1547.85 287.233   2
   7   3  -3 1335.69 326.610   1
   7  -3  -3 1634.22 251.553   3
   7   3  -2 3105.10 467.680   1
   7  -3  -2 3531.05 328.415   3
  -7  -3   1 13930.3 968.321   1
   7   3  -1 13972.5 577.447   4
   7   3  -1 12678.2 951.001   1
   7   3   0 4770.39 571.522   1
   7   3   0 5120.79 340.198   4
  -7  -3   0 5348.57 582.760   1
  -7  -3   0 5324.07 568.879   2
  -7  -3  -1 2561.91 405.582   2
   7   3   1 2280.88 402.003   1
   7   3   1 2821.50 260.938   4
  -7  -3  -1 2580.98 393.201   1
   7   3   2 242.558 180.539   1
   7   3   2 162.859 95.5540   4
  -7  -3  -2 184.626 126.019   1
   7   3   3 31075.2 1577.54   1
  -7  -3  -3 31416.7 1545.91   1
   7   3   3 32010.5 1509.55   3
   7   3   3 31825.3 1267.09   4
  -7  -3  -3 31879.8 1649.64   2
   7   3   4 10889.2 851.208   1
  -7  -3  -4 11262.8 841.035   1
   7   3   4 10283.1 791.305   3
   7  -3   5 2117.61 416.665   2
   7   3   5 2297.67 382.523   3
   7   3   5 2237.04 369.839   1
   7  -3   6 396.568 222.423   2
   7   3   6 29.3350 135.926   4
   7   3   6 7.92821 132.787   3
   7   3   6 45.6740 159.374   1
   7  -3   7 2120.47 472.940   2
   7  -3   7 1853.52 370.925   1
   7  -3   7 2411.74 449.113   4
   7   3   7 2374.22 380.254   4
   7   3   7 2506.06 389.325   1
   7   3   7 2450.03 418.174   3
  -7   3  -7 1728.56 190.315   3
   7  -3   8 7118.25 847.599   2
   7  -3   8 6625.87 683.384   1
   7  -3   8 8560.15 855.271   4
   7   3   8 8328.92 750.327   4
   7   3   8 8614.49 839.038   3
  -7   3  -8 6523.72 447.923   3
   7   3   8 8449.89 708.433   1
   7   3   9 3971.56 475.485   1
   7  -3   9 3893.98 607.688   4
   7   3   9 4121.65 557.655   4
  -7   3  -9 2976.98 321.067   3
   7  -3   9 4144.14 645.588   2
   7   3  10 285.592 145.226   1
   7  -3  10 373.400 233.577   4
   7   3  10 265.097 203.034   4
  -7   3 -10 193.925 161.837   3
   7  -3  10 234.976 264.185   2
   7  -3  11 338.921 165.767   1
   7  -3  11 1191.84 402.744   4
   7   3  11 1066.25 352.699   4
  -7   3 -11 540.813 185.238   3
   7   3  11 877.313 202.518   1
   7  -3  11 656.678 319.214   2
   7  -3  12 3976.58 686.931   4
  -7   3 -12 2315.64 383.776   3
   7  -3  12 2824.97 610.603   2
   7  -3  13 6180.44 855.341   4
   7  -3  14 991.706 467.839   4
   7  -3  15 1246.69 478.882   4
   7  -4 -18 274.211 390.984   3
   7   4 -17 2968.59 559.838   1
   7  -4 -17 2356.16 672.577   3
   7   4 -16 2967.55 534.650   1
   7  -4 -16 2708.50 454.904   1
   7  -4 -16 2119.79 601.317   3
   7  -4 -15 8556.72 827.582   1
   7   4 -15 9024.03 949.538   1
   7  -4 -15 9218.36 1118.97   3
   7   4 -14 970.845 362.433   1
   7  -4 -14 795.525 292.951   1
   7  -4 -14 802.958 346.349   3
   7   4 -13 2535.53 519.754   1
   7  -4 -13 3461.53 538.520   1
   7  -4 -13 2451.37 547.870   3
   7   4 -12 1263.13 274.250   4
   7   4 -12 1134.77 387.691   1
   7  -4 -12 1265.59 406.745   3
   7  -4 -12 1655.35 376.038   1
   7   4 -11 36074.0 1528.54   4
   7  -4 -11 35089.1 1957.58   3
   7   4 -11 38158.0 2039.86   1
   7   4 -10 1008.01 214.891   4
   7   4 -10 701.719 280.373   1
   7  -4 -10 599.075 247.554   3
   7   4  -9 612.359 165.816   4
   7   4  -9 644.832 303.572   1
   7  -4  -9 986.874 334.489   3
   7   4  -8 5828.64 416.298   4
   7  -4  -8 5624.13 651.430   3
   7   4  -8 5943.05 732.596   1
  -7  -4   7 97275.4 3496.85   1
   7   4  -7 90336.8 2611.08   4
   7  -4  -7 101210. 3322.10   3
   7   4  -7 91822.3 3542.16   1
  -7  -4   6 423.737 168.160   2
   7   4  -6 381.931 89.6297   4
  -7  -4   6 312.098 203.908   1
   7   4  -6 556.991 277.672   1
   7   4  -5 16902.1 1200.90   1
   7   4  -5 15012.2 539.291   4
  -7  -4   5 17092.8 910.770   2
  -7  -4   5 17117.5 1159.37   1
  -7  -4   4 864.395 214.961   2
   7  -4  -4 445.036 179.612   3
   7   4  -4 962.054 274.837   1
   7   4  -3 43901.5 2099.54   1
   7  -4  -3 46601.3 1737.27   3
  -7  -4   2 1580.01 342.606   1
   7   4  -2 1956.23 405.471   1
   7   4  -1 17132.6 1154.87   1
   7   4  -1 15813.6 543.375   4
  -7  -4   1 18166.5 1073.15   2
  -7  -4   1 16356.7 1107.74   1
   7   4   0 1553.39 156.613   4
  -7  -4   0 1935.42 367.211   1
   7   4   0 1679.70 348.337   1
  -7  -4   0 1817.30 359.230   2
  -7  -4  -1 25602.8 1416.50   1
   7   4   1 24217.9 1427.08   1
   7   4   1 25435.2 926.993   4
  -7  -4  -1 24858.0 1397.46   2
  -7  -4  -2 29284.0 1522.16   1
   7   4   2 28462.2 1092.15   4
  -7  -4  -2 29993.8 1583.68   2
   7   4   2 26658.1 1512.62   1
  -7  -4  -3 15223.4 1040.92   1
   7   4   3 14916.4 765.180   4
   7   4   3 13998.5 1022.79   1
  -7  -4  -4 9813.59 811.687   1
   7   4   4 9450.94 822.132   3
   7   4   4 9890.51 842.136   1
   7   4   5 9074.77 819.297   3
  -7  -4  -5 9409.26 787.868   1
   7   4   5 9075.54 808.199   1
   7  -4   6 3314.35 560.612   2
   7  -4   6 3020.65 502.046   1
   7   4   6 2868.21 447.062   1
   7   4   6 3692.64 435.771   4
   7   4   6 2689.60 436.558   3
  -7  -4  -6 2856.84 430.561   1
   7  -4   7 26938.5 1543.56   1
   7  -4   7 37866.9 1912.61   4
   7   4   7 33434.1 1523.95   4
   7   4   7 33601.1 1692.00   3
  -7   4  -7 22894.3 896.950   3
   7   4   7 32622.3 1565.92   1
   7  -4   7 33828.5 1892.68   2
   7  -4   8 5649.79 774.617   2
   7   4   8 4981.37 578.072   1
   7  -4   8 6721.77 783.956   4
   7  -4   8 4352.06 552.744   1
  -7   4  -8 4155.16 337.442   3
   7   4   8 4759.27 642.860   3
   7  -4   9 597.454 327.567   2
   7   4   9 569.345 211.386   1
   7  -4   9 775.847 335.509   4
   7  -4   9 584.578 221.852   1
  -7   4  -9 467.506 143.479   3
   7  -4  10 1603.73 466.482   2
   7  -4  10 1723.01 456.848   4
   7  -4  10 1039.47 271.674   1
  -7   4 -10 1576.19 266.359   3
   7   4  10 2437.08 386.985   1
   7  -4  11 14378.2 1261.63   4
   7   4  11 13091.5 825.945   1
   7  -4  11 11558.1 1180.04   2
   7  -4  12 8712.75 994.602   4
   7  -4  12 5689.85 872.278   2
   7  -4  13 8844.94 1042.09   4
   7  -4  13 6293.42 925.684   2
   7  -4  14 159.702 230.076   4
   7  -4  15 4362.55 805.340   4
   7  -5 -18 3619.15 792.516   3
   7  -5 -17-164.658 407.862   3
   7   5 -17 539.929 255.517   1
   7   5 -16-231.593 268.913   1
   7  -5 -16-367.977 441.840   3
   7  -5 -16-41.1332 185.619   1
   7   5 -15 728.274 279.740   1
   7  -5 -15 1340.43 459.685   3
   7  -5 -15 1234.94 341.647   1
   7   5 -14 8878.39 978.244   1
   7  -5 -14 8761.54 875.035   1
   7  -5 -14 10646.4 1155.26   3
   7   5 -13 3804.93 643.559   1
   7  -5 -13 3549.20 660.770   3
   7   5 -12 1826.20 313.701   4
   7  -5 -12 1319.44 423.891   3
   7   5 -11 736.783 189.896   4
   7   5 -11 849.433 323.557   1
   7  -5 -11 1010.45 371.329   3
   7   5 -10 12144.9 711.985   4
   7  -5 -10 12040.3 1058.98   3
   7   5 -10 12880.5 1152.79   1
   7   5  -9 1561.17 223.232   4
   7   5  -9 1333.80 360.614   1
   7  -5  -9 1424.48 374.812   3
  -7  -5   8 3093.47 320.198   2
   7   5  -8 3336.82 574.365   1
   7  -5  -8 2327.72 446.035   3
  -7  -5   7 488.278 155.744   2
   7   5  -7 309.702 246.391   1
   7  -5  -7 181.577 176.740   3
   7   5  -6 8677.81 897.057   1
   7  -5  -6 8834.44 803.188   3
  -7  -5   6 8745.62 638.313   2
   7   5  -5 357.997 255.088   1
  -7  -5   5 115.554 109.818   2
   7  -5  -4 25099.7 1288.40   3
   7   5  -4 24016.3 1525.72   1
  -7  -5   3 446.004 202.129   1
   7   5  -3 264.779 217.398   1
  -7  -5   2 406.372 200.810   1
   7   5  -2 342.411 237.632   1
  -7  -5   2 479.642 194.103   2
  -7  -5   1 2537.06 454.819   1
   7   5  -1 2131.63 429.336   1
  -7  -5   1 2449.78 404.065   2
  -7  -5   0 22647.2 1376.45   1
  -7  -5   0 22228.3 1307.63   2
   7   5   0 20500.4 1363.10   1
  -7  -5  -1 281.726 179.667   1
   7   5   1 259.052 191.174   1
  -7  -5  -1 232.152 160.039   2
  -7  -5  -2 81.1056 126.661   1
   7   5   2-208.376 219.319   1
   7  -5   3 6032.92 711.445   1
   7   5   3 6509.71 723.885   1
  -7  -5  -3 5522.30 630.955   1
   7  -5   4 545.563 236.645   1
   7   5   4 651.213 273.043   1
  -7  -5  -4 483.348 222.803   1
   7   5   4 500.337 241.105   3
   7  -5   5 2547.23 475.784   1
   7   5   5 3530.14 526.886   1
   7   5   5 3002.44 509.568   3
  -7  -5  -5 2743.42 448.904   1
  -7  -5  -6 302.853 182.402   1
   7  -5   6 214.373 197.452   1
  -7   5  -6 215.089 58.4104   3
   7   5   6 73.3965 183.757   3
   7  -5   7 3000.60 487.385   1
   7   5   7 3743.48 548.961   1
  -7   5  -7 2399.84 218.036   3
  -7  -5  -7 3110.83 450.876   1
   7  -5   8 20445.8 1360.54   1
   7  -5   8 26489.5 1661.26   4
  -7  -5  -8 23748.0 1286.77   1
   7   5   8 24678.6 1412.41   1
   7  -5   8 24896.3 1677.64   2
   7  -5   9 224.077 296.214   2
   7  -5   9 108.228 238.616   4
  -7   5  -9-88.8575 110.593   3
   7   5   9 177.285 206.967   1
   7  -5  10 9065.71 1066.00   2
   7  -5  10 11710.0 1126.32   4
   7   5  10 10532.7 857.908   1
  -7   5 -10 7638.03 571.271   3
   7  -5  11 4390.37 759.913   2
   7  -5  11 4255.06 712.694   4
   7  -5  12 4084.78 701.633   4
   7  -5  12 3414.50 679.466   2
   7  -5  13 856.454 404.914   4
   7  -5  13 16.6146 262.223   2
   7  -5  14 8065.05 1035.60   4
   7  -5  14 5821.61 932.579   2
   7  -6 -17-426.604 390.161   3
   7  -6 -16 2728.10 715.169   3
   7   6 -16 2717.71 566.987   1
   7  -6 -15 775.410 314.532   1
   7  -6 -15 450.991 399.679   3
   7   6 -15 161.554 205.952   1
   7   6 -14-337.886 317.450   1
   7  -6 -14 302.502 360.371   3
   7   6 -13-106.537 245.835   1
   7  -6 -13 213.344 296.001   3
   7   6 -12 458.017 254.044   1
   7  -6 -12 844.176 401.134   3
   7   6 -11 1440.08 447.826   1
   7  -6 -11 1111.12 386.158   3
   7  -6 -10 19605.5 1417.48   3
   7   6 -10 17567.5 1433.67   1
   7   6  -9 8785.47 962.252   1
   7  -6  -9 8201.49 891.950   3
  -7  -6   9 8468.80 544.534   2
   7   6  -8 4006.14 657.284   1
   7  -6  -8 5508.77 688.014   3
  -7  -6   8 4814.91 449.506   2
   7   6  -7 6118.65 791.901   1
   7  -6  -7 6428.04 736.568   3
  -7  -6   7 6550.74 561.916   2
   7  -6  -6 11526.8 959.053   3
   7   6  -6 13043.3 1118.69   1
   7   6  -5 216.344 215.798   1
   7   6  -4 1138.51 356.415   1
  -7  -6   4 1835.91 340.592   2
   7   6  -3 5469.92 704.018   1
   7   6  -2 34748.3 1913.20   1
   7   6  -1 187.808 176.226   1
  -7   6   1 613.955 179.408   3
   7   6   0 7573.82 818.755   1
  -7   6   0 6790.94 490.039   3
   7   6   1 2765.72 508.697   1
  -7   6  -1 2258.48 253.033   3
  -7   6  -2 15763.3 697.471   3
   7   6   2 19543.0 1337.15   1
   7   6   3 301.055 183.837   1
  -7   6  -3 162.570 75.3893   3
   7   6   4-204.965 243.275   1
  -7   6  -4 85.3402 74.3974   3
   7   6   5 323.270 228.992   1
  -7   6  -5 30.4252 59.1711   3
   7   6   6 11499.6 1003.75   1
  -7  -6  -6 11389.6 939.748   1
  -7  -6  -7 868.191 272.400   1
   7   6   7 707.564 302.880   1
   7  -6   8 16362.5 1376.18   4
   7   6   8 14519.9 1146.89   1
   7  -6   9 296.885 310.181   2
   7  -6   9 668.841 344.923   4
  -7   6  -9-86.1010 124.752   3
   7   6   9 352.015 183.262   1
   7  -6  10 2978.12 629.023   2
   7  -6  10 2863.71 608.091   4
   7   6  10 2891.92 485.378   1
   7  -6  11 3177.59 697.515   2
   7  -6  11 4071.62 734.437   4
   7  -6  12 3092.45 651.661   2
   7  -6  12 3063.39 652.769   4
   7  -6  13-123.736 308.471   4
   7  -6  13-527.108 323.304   2
   7  -6  14 4560.85 823.950   4
   7  -6  14 2393.98 604.459   2
   7  -6  15 835.674 491.659   2
   7  -7 -17 6250.36 1062.74   3
   7  -7 -16 158.344 354.917   3
   7   7 -16-63.3687 239.443   1
   7  -7 -15 403.655 383.876   3
   7   7 -15-218.346 279.649   1
   7  -7 -14-47.5920 347.613   3
   7   7 -14 500.977 311.726   1
   7  -7 -13 4570.19 810.114   3
   7   7 -13 4778.28 809.181   1
   7   7 -12 1321.77 388.643   1
   7  -7 -12 2010.42 524.929   3
   7   7 -11 2500.54 548.139   1
   7  -7 -11 3729.23 676.805   3
   7   7 -10 10078.0 1101.54   1
   7  -7 -10 10505.3 1078.90   3
  -7  -7  10 10089.8 597.583   2
   7  -7  -9 16295.7 1340.21   3
   7   7  -9 17143.7 1433.83   1
  -7  -7   9 17603.6 915.856   2
   7   7  -8-141.251 232.196   1
   7  -7  -8 23.4651 215.191   3
  -7  -7   8-246.347 146.592   2
   7   7  -7 11345.5 1127.81   1
   7   7  -6 2097.66 471.099   1
   7   7  -5 33429.0 1982.05   1
   7   7  -4 537.638 338.331   1
  -7   7   4 731.858 254.114   3
  -7   7   3 14136.8 950.842   3
   7   7  -3 14326.7 1231.78   1
   7   7  -2 512.295 285.766   1
  -7   7   2 1263.75 272.719   3
  -7   7   1 26678.1 1264.31   3
   7   7  -1 25831.4 1674.33   1
   7   7   0 569.441 241.538   1
  -7   7   0 967.228 220.875   3
  -7   7  -1 46319.9 1697.68   3
   7   7   1 47835.3 2374.89   1
  -7   7  -2 10146.3 620.501   3
   7   7   2 11159.7 1037.41   1
   7   7   3 606.150 311.449   1
  -7   7  -3 465.872 141.244   3
   7   7   4 2436.81 506.258   1
  -7   7  -4 2063.75 244.130   3
   7   7   5 76960.6 3284.17   1
   7   7   6 1272.76 395.709   1
   7   7   7 83.2647 194.111   1
   7   7   8 1813.67 413.729   1
   7  -7   9 17506.8 1460.12   4
   7   7   9 15513.6 1242.65   1
   7  -7  10 430.701 283.252   2
   7  -7  10 402.629 280.698   4
   7   7  10 270.067 168.952   1
   7  -7  11 2274.67 595.715   2
   7  -7  11 3659.53 741.583   4
   7  -7  12 144.658 304.229   2
   7  -7  12-368.412 346.176   4
   7  -7  13 8455.75 1138.39   2
   7  -7  13 12658.7 1326.75   4
   7  -7  14 235.881 311.396   2
   7   8 -16 239.293 260.406   1
   7  -8 -16 1780.20 633.039   3
   7   8 -15 261.089 245.481   1
   7  -8 -15 288.903 434.552   3
   7  -8 -14 812.811 427.542   3
   7   8 -14 1063.78 455.707   1
   7  -8 -13 435.075 308.314   3
   7   8 -13 478.901 406.865   1
   7  -8 -12 3671.85 731.830   3
   7   8 -12 4017.61 771.451   1
   7  -8 -11 5322.89 841.513   3
   7   8 -11 5275.58 859.989   1
   7   8 -10 208.551 262.616   1
   7  -8 -10 1461.21 401.714   3
   7   8  -9 377.913 303.238   1
  -7  -8   9 984.489 243.166   2
   7   8  -8 156.164 321.094   1
   7   8  -7 2343.37 573.438   1
   7   8  -6 13173.4 1281.15   1
   7   8  -5 192.061 274.348   1
  -7   8   5 156.284 209.554   3
   7   8  -4 2148.24 537.059   1
  -7   8   4 3237.29 494.059   3
   7   8  -3 1769.86 447.750   1
  -7   8   3 2070.09 377.628   3
  -7   8   2 10718.2 843.080   3
   7   8  -2 12415.7 1185.87   1
   7   8  -1 734.823 358.152   1
  -7   8   1 917.048 243.077   3
   7   8   0 2869.26 584.313   1
  -7   8   0 2823.88 376.377   3
   7   8   1 651.131 276.390   1
  -7   8  -1 347.672 161.781   3
   7   8   2 4745.94 729.175   1
  -7   8  -2 5026.27 466.316   3
  -7   8  -3 282.711 119.411   3
   7   8   3 716.867 301.032   1
  -7   8  -4 586.072 185.317   3
   7   8   4 617.666 359.276   1
   7   8   5 6469.43 871.638   1
   7   8   6 27646.3 1856.36   1
   7   8   7 4248.72 707.567   1
   7   8   8 149.345 213.214   1
   7  -8   9 2067.42 524.372   4
   7   8   9 1928.21 462.947   1
   7  -8  10 6913.00 956.641   4
   7   8  10 6499.85 810.520   1
   7  -8  11 562.418 441.580   2
   7  -8  11 856.744 473.532   4
   7  -8  12 2978.70 690.340   2
   7  -8  12 3718.19 744.389   4
   7  -8  13 416.968 398.718   2
   7  -8  14 467.840 427.060   2
   7   9 -16-66.4515 325.679   1
   7   9 -15 183.165 326.292   1
   7   9 -14 5901.35 977.101   1
   7   9 -13 3404.86 761.044   1
   7   9 -12 6427.44 1011.14   1
   7   9 -11 634.906 346.882   1
   7   9 -10 13191.8 1385.65   1
   7   9  -9 911.966 422.559   1
   7   9  -8 20711.3 1720.49   1
   7   9  -7 2683.69 635.058   1
   7   9  -6 5379.61 868.930   1
   7   9  -5-159.456 270.885   1
   7   9  -4 11450.5 1223.22   1
  -7   9   3 330.954 200.595   3
   7   9  -3 98.5845 288.038   1
  -7   9   2-89.7291 153.095   3
   7   9  -2 223.885 275.319   1
  -7   9   1 438.757 199.591   3
   7   9  -1 606.484 342.205   1
   7   9   0 34212.0 2131.71   1
  -7   9   0 28889.9 1484.12   3
  -7   9  -1 3719.70 468.188   3
   7   9   1 4260.71 745.114   1
  -7   9  -2 1068.34 253.502   3
   7   9   2 423.422 324.852   1
   7   9   3 3183.20 637.584   1
   7   9   4 14387.5 1362.13   1
   7   9   5-110.251 312.776   1
   7   9   6 4404.30 738.230   1
   7   9   7 1910.54 518.453   1
   7   9   8 5470.06 790.665   1
   7  -9   9 1323.68 445.334   4
   7   9   9 1283.16 395.519   1
   7  -9  10 8542.58 1093.23   4
   7  -9  11 1975.21 577.228   2
   7  -9  11 1513.68 471.522   4
   7  -9  12 1253.49 506.005   2
   7  -9  13-1580.60 641.071   2
   7  10 -15 3678.78 819.409   1
   7  10 -14 792.556 414.433   1
   7  10 -13 571.384 458.796   1
   7  10 -12 660.007 406.267   1
   7  10 -11 16490.4 1652.89   1
   7  10 -10-111.556 371.369   1
   7  10  -9 478.185 325.111   1
   7  10  -8 1787.53 525.374   1
   7  10  -7 14740.8 1488.62   1
   7  10  -6 819.313 491.090   1
   7  10  -5 980.374 402.700   1
   7  10  -4 2069.80 557.735   1
   7  10  -3 16467.6 1526.09   1
   7  10  -2 1617.95 487.983   1
   7  10  -1 21408.0 1759.06   1
   7  10   0-293.216 277.452   1
   7  10   1 11482.3 1251.81   1
   7  10   2 3433.49 730.544   1
   7  10   3 13368.5 1380.32   1
   7  10   4 198.245 264.082   1
   7  10   5 437.922 368.068   1
   7  10   6 180.619 293.041   1
   7  10   7 17844.4 1579.75   1
   7  10   8 306.425 247.252   1
   7 -10   9 583.470 345.645   4
   7  10   9 613.817 300.075   1
   7 -10  10 162.907 243.837   4
   7 -10  12 773.269 418.963   2
   7  11 -15 86.7792 312.913   1
   7  11 -14 747.666 465.193   1
   7  11 -13 782.467 414.865   1
   7  11 -12-175.611 304.978   1
   7  11 -11 641.796 406.795   1
   7  11 -10 2052.66 608.732   1
   7  11  -9 581.880 452.700   1
   7  11  -8-48.7640 310.339   1
   7  11  -7 283.399 340.254   1
   7  11  -6 371.091 367.780   1
   7  11  -5 6678.92 1043.39   1
   7  11  -4 5429.23 924.917   1
   7  11  -3 840.788 288.723   1
   7  11  -2 5834.21 976.755   1
   7  11  -1 3704.47 791.208   1
   7  11   0-171.967 253.588   1
   7  11   1 436.145 358.632   1
   7  11   2 112.848 281.691   1
   7  11   3 571.580 350.015   1
   7  11   4 336.104 293.356   1
   7  11   5 4439.53 863.396   1
   7  11   6 112.849 310.068   1
   7  11   7 1121.52 405.998   1
   7  11   8 1440.41 514.909   1
   7 -11   9 370.831 350.042   4
   7  12 -12 4032.05 921.226   1
   7  12 -11 3690.99 873.906   1
   7  12 -10 2820.00 744.037   1
   7  12  -9 3892.74 883.601   1
   7  12  -8 784.332 504.685   1
   7  12  -7 873.296 461.304   1
   7  12  -6 11706.2 1440.11   1
   7  12  -5 3068.50 719.699   1
   7  12  -4 2729.34 675.174   1
   7  12  -3 938.896 453.233   1
   7  12  -2 17362.3 1690.11   1
   7  12  -1 1172.77 533.535   1
   7  12   0 132.313 264.876   1
   7  12   1 204.362 267.847   1
   7  12   2 14381.6 1551.04   1
   7  12   3 3238.26 782.298   1
   7  12   4 3990.37 831.167   1
   7  12   5 388.856 325.175   1
   7  12   6 6605.86 1062.19   1
   7  12   7 230.401 393.169   1
   7  12   8 6886.29 1069.54   1
   7  13  -7-348.341 392.312   1
   7  13  -6 2304.75 690.175   1
   7  13  -5 5885.99 1072.90   1
   7  13  -4 671.432 473.613   1
   7  13  -3 1488.03 587.977   1
   7  13  -2 183.658 359.112   1
   7  13  -1 1467.19 493.442   1
   7  13   0 602.095 437.082   1
   7  13   1 5254.77 999.311   1
   7  13   2 79.8184 390.619   1
   7  13   3 3620.26 874.634   1
   7  13   4 5277.59 976.185   1
   7  13   5 8636.19 1232.56   1
   7  13   6 3500.70 798.529   1
   7  13   7-453.378 405.907   1
   8   0 -19-910.092 562.782   3
   8   0 -18 3890.56 866.567   3
   8   0 -17 440.793 408.642   3
   8   0 -17-218.589 271.743   1
   8   0 -16 285.583 233.185   1
   8   0 -15-315.666 240.063   1
   8   0 -14 82.4029 179.786   1
   8   0 -13-45.2673 211.980   1
   8   0 -12 3942.42 574.126   1
   8   0 -12 2872.67 220.823   2
   8   0 -11 54.6380 82.0499   2
   8   0 -11 137.675 188.223   1
   8   0 -10 15891.3 1191.00   1
   8   0 -10 15620.3 765.988   2
   8   0  -9 18.0057 111.858   2
   8   0  -9-116.516 210.750   1
   8   0  -8 17961.6 1245.99   1
   8   0  -8 17059.6 893.142   2
   8   0  -7-296.240 167.053   2
   8   0  -7-81.9454 156.906   1
   8   0  -6 5580.48 678.876   1
   8   0  -6 6493.83 555.695   2
   8   0  -5-19.8210 122.299   2
   8   0  -5 38.7741 170.472   1
   8   0  -4 405.627 206.492   2
   8   0  -4 763.186 269.792   1
   8   0  -3-241.773 204.185   1
   8   0  -3-321.158 205.826   2
   8   0  -2 46339.1 2064.76   1
   8   0  -2 44296.6 1923.91   2
   8   0  -1 134.216 177.431   2
   8   0  -1-123.826 150.136   1
   8   0   0 21796.1 1293.05   1
   8   0   0 21753.1 1291.30   2
   8   0   1 168.554 193.236   2
   8   0   1-107.468 173.133   1
   8   0   2 4478.46 315.778   3
   8   0   2 6104.89 638.445   1
   8   0   2 5622.42 663.637   2
   8   0   3 180.063 85.7237   3
   8   0   3 379.436 203.170   1
   8   0   3 187.768 180.593   2
   8   0   4 21667.4 1273.78   1
   8   0   4 21044.3 1187.24   4
   8   0   4 20978.6 1391.02   2
   8   0   5-144.129 185.174   4
   8   0   5 20.7848 131.504   1
   8   0   5 181.990 256.332   2
   8   0   6 21036.4 1256.56   4
   8   0   6 21046.3 1227.91   1
   8   0   6 17367.6 1346.41   2
   8   0   7-44.8517 160.693   1
   8   0   7 112.992 186.419   4
   8   0   8 166.035 249.499   4
   8   0   8 168.852 155.671   1
   8   0   9 312.143 215.791   4
   8   0   9 122.262 166.947   1
   8   0  10 25593.6 1289.98   1
   8   0  10 28449.5 1684.88   4
   8   0  11 259.672 283.535   4
   8   0  11-184.884 148.461   1
   8   0  12 224.049 293.442   4
   8   0  13 221.301 294.861   4
   8   0  14 21094.7 1676.59   4
   8   0  15-620.964 368.342   4
   8   1 -19 1023.76 559.162   3
   8  -1 -19 626.191 396.326   3
   8  -1 -18 1319.86 589.161   3
   8   1 -17 290.742 229.478   1
   8  -1 -17 374.792 376.083   3
   8  -1 -16 611.613 231.803   1
   8  -1 -16 408.103 421.410   3
   8   1 -16 917.018 281.734   1
   8  -1 -15 2958.59 509.539   1
   8  -1 -15 2773.55 768.787   3
   8   1 -15 3972.57 612.638   1
   8  -1 -14 2588.97 600.358   3
   8  -1 -14 2301.74 479.626   1
   8   1 -14 2625.12 517.542   1
   8   1 -13 2015.68 443.620   1
   8  -1 -13 2645.27 489.437   1
   8  -1 -12 263.964 212.508   1
   8   1 -12-281.040 259.106   1
   8  -1 -11 4374.99 617.689   1
   8   1 -11 3730.97 599.932   1
   8   1 -11 4656.38 527.262   4
   8   1 -10 22250.2 1441.05   1
   8  -1 -10 19771.0 1356.68   1
   8  -1  -9 17024.4 1229.37   1
   8   1  -9 18388.4 1283.71   1
   8  -1  -8 15938.9 1178.74   1
   8   1  -8 17777.3 1251.70   1
   8   1  -8 17718.9 869.048   2
   8  -1  -7 265.532 186.137   1
   8   1  -7 180.330 219.171   1
   8   1  -7 156.995 119.438   2
   8  -1  -6 20079.4 1299.77   1
   8   1  -6 18920.7 1277.14   1
   8   1  -6 18845.0 990.704   2
   8   1  -5 1171.80 325.182   1
   8  -1  -5 1590.54 358.438   1
   8   1  -5 1283.92 251.968   2
   8  -1  -4 66598.8 2641.24   1
   8   1  -4 66474.6 2673.07   1
   8   1  -4 63947.2 2365.37   2
   8  -1  -3 13874.1 1015.66   1
   8   1  -3 13953.0 1059.81   1
   8   1  -3 15461.8 965.403   2
   8  -1  -2 9773.96 850.775   1
   8   1  -2 10715.1 884.659   1
   8   1  -2 9159.55 758.322   2
   8  -1  -2 9102.22 770.483   2
   8  -1  -1 20739.4 1263.89   1
   8   1  -1 21921.9 1313.12   1
   8   1  -1 21347.4 1251.93   2
   8  -1  -1 21687.5 1268.92   2
   8  -1   0 22212.5 1298.88   1
   8   1   0 22122.0 1329.42   1
   8   1   0 23204.7 1335.14   2
   8  -1   0 20652.9 1270.04   2
   8  -1   1 5000.77 620.345   2
   8   1   1 4940.35 609.343   1
   8  -1   1 5429.12 620.548   1
   8   1   1 5197.98 632.356   2
   8  -1   2 686.715 235.597   1
   8  -1   2 812.088 271.606   2
   8   1   2 1108.17 297.310   1
   8   1   2 1112.32 204.623   3
   8   1   2 1050.73 319.479   2
   8  -1   3 6881.28 774.103   2
   8  -1   3 7063.58 684.342   1
   8   1   3 6902.83 501.679   3
   8   1   3 7495.92 718.072   1
   8   1   3 7431.25 770.149   2
   8   1   4 33973.2 1513.03   4
   8  -1   4 30995.0 1596.05   1
   8   1   4 34702.0 1354.97   3
   8   1   4 32553.9 1644.01   1
   8  -1   4 32103.3 1807.95   2
   8  -1   5 5457.52 605.148   4
   8   1   5 4335.59 491.465   4
   8   1   5 4258.46 430.062   3
   8  -1   5 5145.69 576.857   1
   8   1   5 4418.64 551.176   1
   8  -1   5 4303.26 630.411   2
   8  -1   6 1510.60 316.904   1
   8  -1   6 1980.43 388.757   4
   8   1   6 1971.44 358.208   4
   8   1   6 2112.08 382.258   1
   8  -1   6 1652.30 440.263   2
   8  -1   7 21677.4 1274.28   1
   8  -1   7 24132.9 1431.06   4
   8   1   7 22853.5 1319.14   4
   8   1   7 21366.6 1255.82   1
   8  -1   7 23096.9 1568.16   2
   8  -1   8 14928.7 1148.11   4
   8   1   8 14705.7 1074.10   4
   8   1   8 13842.2 949.657   1
   8  -1   8 14266.9 1246.01   2
   8  -1   8 14615.4 1005.80   1
   8   1   9 39066.7 1736.25   1
   8  -1   9 41645.7 2081.21   4
   8   1   9 39257.2 1980.82   4
   8  -1   9 39416.8 1774.87   1
   8   1  10 7232.53 630.040   1
   8  -1  10 7270.21 843.073   4
   8   1  10 6803.40 785.255   4
   8  -1  10 5844.14 591.249   1
   8  -1  11 1559.63 386.790   4
   8   1  11 2153.53 491.734   4
   8  -1  11 1024.74 237.594   1
   8   1  11 1412.22 253.920   1
   8  -1  12 6254.94 819.445   4
   8   1  12 6051.95 794.450   4
   8  -1  13 7152.93 919.591   4
   8   1  13 6681.42 889.280   4
   8  -1  14 3521.21 685.542   4
   8   1  14 3270.95 671.143   4
   8  -1  15-5.08892 258.781   4
   8   1  15 557.381 410.035   4
   8  -2 -18 118.386 339.531   3
   8   2 -17 2098.73 454.859   1
   8  -2 -17 2878.53 743.286   3
   8   2 -16 4254.04 643.952   1
   8  -2 -16 4538.72 618.407   1
   8  -2 -16 4097.73 773.232   3
   8  -2 -15 1087.49 494.086   3
   8   2 -15 831.282 332.605   1
   8  -2 -15 1180.12 352.868   1
   8  -2 -14 3282.50 534.505   1
   8  -2 -14 3560.83 699.448   3
   8   2 -14 2724.29 544.556   1
   8   2 -13 12876.0 1137.49   1
   8  -2 -13 14481.6 1301.54   3
   8  -2 -13 13843.9 1123.15   1
   8  -2 -12 1412.44 435.040   3
   8  -2 -12 939.289 325.838   1
   8   2 -12 986.153 321.920   1
   8  -2 -11 4747.73 646.817   1
   8   2 -11 4079.24 618.382   1
   8   2 -11 4225.05 476.045   4
   8  -2 -11 3990.88 605.444   3
   8   2 -10 2245.29 455.284   1
   8  -2 -10 1677.69 394.165   1
   8   2 -10 2211.92 337.004   4
   8  -2 -10 1982.81 444.523   3
   8  -2  -9 2177.53 444.454   1
   8   2  -9 1320.31 366.590   1
   8  -2  -9 1893.47 420.433   3
   8   2  -8 18699.1 1291.55   1
   8  -2  -8 16823.8 1210.50   1
   8   2  -7 35798.9 1904.60   1
   8  -2  -7 38457.3 1917.65   1
   8   2  -6 12611.1 1040.14   1
   8   2  -5 5811.18 698.460   1
   8  -2  -4 900.497 206.586   3
   8   2  -4 1048.14 321.575   1
   8  -2  -3 17831.0 881.746   3
   8   2  -3 21199.5 1325.73   1
   8  -2  -2 5647.84 403.839   3
   8   2  -2 5577.58 656.722   1
   8  -2  -1 315.018 91.4793   3
   8   2  -1 242.738 186.287   1
   8   2   0-39.4985 160.209   1
   8   2   1 38777.7 1464.40   4
   8   2   1 37717.8 1841.12   1
   8  -2   2 2789.71 489.522   2
   8   2   2 1948.14 278.728   4
   8   2   2 1817.67 353.110   1
   8  -2   3 212.708 207.203   2
   8   2   3-1.25784 191.668   1
   8   2   3 432.778 189.457   3
   8  -2   4 313.965 246.922   2
   8   2   4 174.594 108.690   4
   8   2   4 259.258 160.176   1
   8   2   4 113.409 136.809   3
   8   2   5 39513.6 1694.15   4
   8   2   5 37008.4 1790.51   1
   8   2   5 39941.5 1673.26   3
   8  -2   5 41062.1 2112.55   2
   8   2   6 13416.4 990.948   1
   8  -2   6 17547.0 1218.16   4
   8   2   6 14769.1 978.919   4
   8   2   6 16157.6 1003.49   3
   8  -2   6 15422.2 1058.68   1
   8  -2   6 15133.1 1246.71   2
   8   2   7 10871.0 855.857   1
   8  -2   7 11328.7 985.177   4
   8   2   7 9798.46 830.002   4
   8  -2   7 10394.0 846.172   1
   8   2   7 11496.6 882.501   3
   8  -2   7 10784.4 1098.44   2
   8  -2   8 849.925 318.000   4
   8   2   8 814.631 263.039   4
   8   2   8 705.781 232.482   1
   8  -2   8 886.160 261.159   1
   8  -2   8 978.961 426.951   2
   8  -2   9 1927.52 364.662   1
   8  -2   9 2226.80 395.331   1
   8  -2   9 2807.68 520.814   4
   8   2   9 2473.96 452.636   4
   8   2   9 2145.76 368.444   1
   8  -2   9 3234.71 649.733   2
   8  -2  10 3370.29 601.228   4
   8   2  10 3295.35 423.317   1
   8   2  10 4050.14 597.843   4
   8  -2  10 2717.75 431.343   1
   8  -2  10 2918.62 623.308   2
   8  -2  11 9355.80 994.230   4
   8   2  11 9368.47 960.867   4
   8  -2  11 9278.58 740.848   1
   8  -2  12 1447.96 450.007   4
   8   2  12 693.793 281.735   4
   8  -2  13 1250.25 431.095   4
   8   2  13 768.961 370.483   4
   8  -2  14 488.017 401.829   4
   8  -2  15 6709.51 975.962   4
   8  -3 -18 1821.57 571.950   3
   8   3 -17-159.163 239.522   1
   8  -3 -17 387.879 366.203   3
   8   3 -16 4482.92 665.222   1
   8  -3 -16 3183.70 715.919   3
   8  -3 -16 3367.51 544.274   1
   8  -3 -15 4898.14 653.480   1
   8   3 -15 3803.33 644.521   1
   8  -3 -15 3411.58 695.325   3
   8   3 -14 630.612 319.164   1
   8  -3 -14 85.7783 158.401   1
   8  -3 -14 142.016 269.821   3
   8  -3 -13 629.010 333.700   3
   8   3 -13 1000.79 355.819   1
   8  -3 -13 738.941 311.043   1
   8   3 -12 5765.95 574.805   4
   8  -3 -12 5705.03 707.432   1
   8  -3 -12 5947.58 800.965   3
   8   3 -12 4971.55 738.800   1
   8  -3 -11 2327.00 475.852   1
   8   3 -11 2076.04 318.220   4
   8  -3 -11 1693.79 463.642   3
   8   3 -11 2131.71 455.999   1
   8   3 -10 37065.9 2045.87   1
   8   3 -10 38506.7 1569.05   4
   8  -3 -10 38301.2 1997.53   3
   8  -3 -10 40610.5 2033.23   1
   8   3  -9 5064.94 450.610   4
   8  -3  -9 5243.57 643.266   3
   8   3  -9 5651.32 732.488   1
   8   3  -8 283.376 258.391   1
   8   3  -8 87.6727 89.9552   4
   8  -3  -8-42.6872 170.169   3
   8   3  -7 222.601 164.262   1
   8  -3  -7 317.883 199.225   3
   8   3  -6 35860.6 1913.15   1
   8   3  -5 5248.06 670.813   1
   8  -3  -5 4546.13 499.491   3
  -8  -3   4 476.292 223.138   1
   8   3  -4 327.038 229.594   1
   8  -3  -4 546.052 175.603   3
  -8  -3   3 4163.32 546.031   1
   8   3  -3 3562.85 535.237   1
   8  -3  -3 3208.72 357.895   3
   8   3  -2 19541.4 1282.98   1
  -8  -3   2 18099.7 1193.55   1
   8  -3  -2 18950.6 858.919   3
  -8  -3   2 21263.3 1191.06   2
   8   3  -1 8758.47 830.322   1
  -8  -3   1 8393.18 778.342   1
  -8  -3   1 8288.03 735.347   2
  -8  -3   0 1965.25 367.918   2
   8   3   0 2112.21 409.354   1
   8   3   0 2148.11 229.039   4
  -8  -3   0 2153.21 384.830   1
  -8  -3  -1 47.4509 134.623   2
  -8  -3  -1-66.2404 109.241   1
   8   3   1 109.387 178.445   1
   8   3   1 86.3474 75.2961   4
   8   3   2 15805.5 1129.72   1
   8   3   2 15594.3 806.217   4
  -8  -3  -2 16103.8 1086.83   1
   8   3   3 9148.26 824.631   1
   8   3   3 8308.85 721.071   3
   8  -3   4 6241.81 768.002   2
   8   3   4 6169.85 614.359   3
   8   3   4 5490.43 645.925   1
   8   3   5 14881.9 1064.52   1
   8   3   5 14627.0 912.451   4
   8   3   5 14944.1 1003.31   3
   8  -3   5 13572.4 1144.35   2
   8   3   6 18621.0 1223.83   1
   8   3   6 20938.0 1165.89   4
   8   3   6 20587.0 1230.98   3
   8  -3   6 20156.2 1493.79   2
   8  -3   7-224.800 276.525   2
   8  -3   7 311.023 257.825   4
   8   3   7 273.084 173.388   4
   8   3   7 566.502 243.241   3
   8   3   7 497.801 184.251   1
   8  -3   8 11029.7 1139.89   2
   8  -3   8 10077.1 902.324   1
   8  -3   8 13289.5 1123.98   4
   8   3   8 12560.1 969.530   4
   8   3   8 13167.7 1036.87   3
   8   3   8 11693.5 916.016   1
   8  -3   9 754.724 265.789   1
   8  -3   9 600.959 194.134   1
   8  -3   9 1058.71 354.450   4
   8   3   9 1256.92 315.306   1
   8   3   9 438.785 182.116   4
   8  -3   9 1146.09 421.007   2
   8   3  10 4043.07 488.194   1
   8  -3  10 3922.33 516.004   1
   8  -3  10 4627.85 715.904   4
   8   3  10 4563.51 642.825   4
   8  -3  10 2627.43 572.263   2
   8  -3  11 674.102 222.658   1
   8  -3  11 528.407 275.993   4
   8   3  11 658.972 316.517   4
   8  -3  11 270.279 264.781   2
   8  -3  12 3702.32 667.819   4
   8  -3  13 1816.11 509.132   4
   8  -3  14-339.194 399.101   4
   8  -4 -18 268.478 395.074   3
   8   4 -17 759.020 306.359   1
   8  -4 -17 424.473 360.693   3
   8   4 -16 7989.17 937.054   1
   8  -4 -16 6777.90 785.757   1
   8  -4 -16 7185.70 1038.53   3
   8   4 -15 2725.90 560.106   1
   8  -4 -15 2526.71 640.181   3
   8  -4 -15 2094.59 431.797   1
   8  -4 -14-33.5905 175.709   1
   8   4 -14-258.778 263.132   1
   8  -4 -14 118.686 280.798   3
   8  -4 -13 5859.17 746.239   1
   8   4 -13 6312.73 854.061   1
   8  -4 -13 6228.18 856.930   3
   8   4 -12 28024.2 1349.53   4
   8  -4 -12 26286.3 1752.02   3
   8  -4 -12 27519.7 1677.97   1
   8   4 -12 28606.8 1825.25   1
   8   4 -11 4502.27 456.099   4
   8   4 -11 4832.16 731.372   1
   8  -4 -11 4814.08 694.253   3
   8   4 -10 1823.12 275.787   4
   8   4 -10 1722.21 424.412   1
   8  -4 -10 705.345 300.611   3
   8   4  -9 4354.26 383.974   4
   8  -4  -9 4269.87 591.454   3
   8   4  -9 4919.34 697.728   1
   8   4  -8 13323.7 1166.30   1
   8   4  -8 13500.3 666.380   4
   8  -4  -8 12972.2 1012.15   3
   8   4  -7 8849.30 473.627   4
   8  -4  -7 9073.44 812.807   3
   8   4  -7 8864.86 923.022   1
   8   4  -6 6463.75 353.227   4
   8   4  -6 5996.47 753.977   1
   8   4  -5 2562.57 184.349   4
   8   4  -5 2750.09 497.772   1
   8   4  -4 16503.7 1236.43   1
   8   4  -4 14848.3 510.631   4
   8  -4  -4 17901.1 986.997   3
   8   4  -3 16982.0 1246.05   1
   8   4  -3 15558.4 511.294   4
   8  -4  -3 17390.6 934.591   3
  -8  -4   3 18672.7 1095.75   2
   8   4  -2 19421.1 1332.42   1
   8   4  -2 19107.1 630.148   4
  -8  -4   2 21061.4 1209.57   2
  -8  -4   1 11.4224 121.537   2
  -8  -4   1 226.417 192.903   1
   8   4  -1 144.331 55.9636   4
   8   4  -1 10.5341 174.720   1
  -8  -4   0 6056.68 658.989   2
  -8  -4   0 6841.01 733.395   1
   8   4   0 6599.35 379.440   4
   8   4   0 6397.63 734.835   1
   8   4   1 9219.80 875.547   1
  -8  -4  -1 8223.77 787.038   1
   8   4   1 7948.03 473.594   4
   8   4   2 28150.5 1619.65   1
  -8  -4  -2 28099.4 1562.62   1
   8   4   2 29468.9 1146.66   4
  -8  -4  -3 4720.43 595.750   1
   8   4   3 5023.73 429.898   4
   8   4   3 4848.88 619.573   1
   8   4   4 461.111 237.238   1
  -8  -4  -4 216.934 164.251   1
   8   4   4 17.3578 163.059   3
   8   4   5 25045.9 1222.03   4
   8   4   5 24135.2 1450.67   3
  -8  -4  -5 23829.8 1391.99   1
   8   4   5 24346.5 1464.28   1
   8  -4   6 37120.6 2011.26   1
   8   4   6 41662.1 1775.23   4
   8   4   6 42635.0 2010.32   3
   8   4   6 41365.9 1992.09   1
   8  -4   6 41175.3 2257.15   2
   8  -4   7-208.588 333.963   2
   8  -4   7-129.028 283.719   4
   8  -4   7 121.122 185.215   1
   8   4   7 48.7317 160.336   1
   8   4   7 260.475 193.133   4
   8   4   7 33.2356 177.825   3
   8  -4   8 1155.82 422.496   2
   8   4   8 1210.48 319.808   1
   8  -4   8 1050.23 290.168   1
   8  -4   8 1382.13 408.768   4
   8   4   8 1194.16 320.574   4
   8  -4   9 1317.83 412.605   2
   8   4   9 1312.67 347.401   1
   8  -4   9 1710.47 446.014   4
   8   4  10 11715.7 902.238   1
   8  -4  10 9647.27 1142.70   2
   8  -4  11 4900.84 799.477   4
   8  -4  11 4853.07 581.301   1
   8  -4  11 4487.18 807.459   2
   8  -4  12 6632.50 915.602   4
   8  -4  12 5621.55 898.615   2
   8  -4  13 854.655 432.045   4
   8  -4  13 995.133 464.527   2
   8  -4  14 1599.20 514.725   4
   8  -5 -18-25.7829 350.755   3
   8   5 -17-205.833 218.266   1
   8  -5 -17 390.683 435.323   3
   8   5 -16-118.169 280.516   1
   8  -5 -16 454.533 347.357   3
   8  -5 -16 377.426 237.513   1
   8   5 -15 3157.23 608.486   1
   8  -5 -15 3006.92 541.881   1
   8  -5 -15 3590.04 735.630   3
   8   5 -14-317.591 286.451   1
   8  -5 -14 100.649 344.658   3
   8  -5 -14 661.519 277.153   1
   8   5 -13 3847.88 692.716   1
   8  -5 -13 3895.04 625.225   1
   8  -5 -13 2528.56 590.796   3
   8   5 -12 39.1312 118.374   4
   8   5 -12 195.619 226.093   1
   8  -5 -12-193.779 348.323   3
   8   5 -11 15983.8 877.107   4
   8  -5 -11 16916.7 1336.13   3
   8   5 -11 16468.4 1384.91   1
   8   5 -10 8952.14 582.706   4
   8   5 -10 9499.99 1025.58   1
   8  -5 -10 8146.45 913.677   3
   8   5  -9 2111.01 244.405   4
   8   5  -9 2545.08 531.168   1
   8  -5  -9 2026.38 470.028   3
   8   5  -8 9732.81 503.160   4
   8  -5  -8 11122.4 958.922   3
   8   5  -8 9277.04 1002.47   1
  -8  -5   7 483.771 170.417   2
   8   5  -7 254.967 230.383   1
   8  -5  -7 412.369 227.139   3
   8   5  -6 1472.69 397.244   1
   8  -5  -6 1461.18 335.124   3
   8   5  -5 26739.6 1692.29   1
  -8  -5   4 1738.13 337.460   2
   8   5  -4 1810.78 434.636   1
   8  -5  -4 1389.17 292.379   3
  -8  -5   3 822.610 246.296   2
   8   5  -3 797.861 301.292   1
   8   5  -2 79.1749 190.023   1
  -8  -5   2 240.386 175.358   2
  -8  -5   1 33849.7 1707.58   2
   8   5  -1 33251.7 1873.88   1
   8   5   0 528.323 263.443   1
   8   5   1-118.538 192.917   1
   8   5   2 439.573 225.541   1
   8   5   3 48644.1 2304.43   1
   8   5   4 1469.23 377.812   1
   8   5   4 1108.52 392.417   3
   8   5   5 3424.86 538.553   1
   8   5   5 3373.14 538.458   3
   8   5   6 1915.92 399.315   1
  -8  -5  -6 1425.48 335.617   1
   8   5   7 14195.2 1077.40   1
   8  -5   7 14655.3 1297.71   2
   8  -5   8 368.147 402.780   2
   8   5   8 245.703 192.385   1
   8  -5   8 165.147 224.095   4
   8   5   9 4317.51 584.977   1
   8  -5   9 3805.64 722.498   2
   8  -5   9 5349.02 786.011   4
   8  -5  10 1462.81 474.744   2
   8  -5  10 2149.76 500.170   4
   8   5  10 1541.78 359.361   1
   8  -5  11 9244.72 1106.34   4
   8  -5  11 6943.15 977.455   2
   8  -5  12 3092.33 673.588   4
   8  -5  12 1818.27 544.090   2
   8  -5  13 868.882 399.979   4
   8  -5  13 502.207 370.483   2
   8  -5  14 1273.04 474.903   2
   8  -6 -17 978.201 533.571   3
   8   6 -17 1362.63 442.897   1
   8   6 -16-69.2171 279.730   1
   8  -6 -16 25.9111 231.238   1
   8  -6 -16-42.8221 326.409   3
   8   6 -15 3740.79 705.833   1
   8  -6 -15 3179.12 567.875   1
   8  -6 -15 3257.06 747.043   3
   8   6 -14 893.939 428.901   1
   8  -6 -14 1033.91 485.102   3
   8   6 -13 4917.49 806.799   1
   8  -6 -13 3754.30 694.527   3
   8   6 -12 631.573 263.562   1
   8  -6 -12 596.953 357.645   3
   8   6 -11 10240.9 1121.51   1
   8  -6 -11 10726.0 1094.14   3
   8   6 -10-44.7149 211.834   1
   8  -6 -10-371.277 332.453   3
   8   6  -9 4572.77 743.622   1
   8  -6  -9 4915.58 694.040   3
   8   6  -8 7517.35 923.079   1
   8  -6  -8 7115.34 798.037   3
  -8  -6   8 7722.44 605.506   2
   8   6  -7 6178.75 826.857   1
   8  -6  -7 6194.08 747.825   3
   8   6  -6 4231.92 669.828   1
   8  -6  -6 3870.58 584.744   3
   8   6  -5 410.716 221.943   1
  -8  -6   5 896.793 240.270   2
   8   6  -4 3254.67 579.447   1
  -8  -6   4 4069.85 513.325   2
   8   6  -3 24751.5 1664.41   1
  -8  -6   3 26162.2 1441.60   2
   8   6  -2 1.79566 199.386   1
  -8  -6   2 206.354 194.386   2
   8   6  -1 4278.38 643.538   1
   8   6   0 32161.4 1890.73   1
   8   6   1 45836.2 2317.26   1
   8   6   2 254.219 210.888   1
   8   6   3 12008.2 1091.23   1
   8   6   4 5990.72 753.582   1
   8   6   5 959.223 336.066   1
   8   6   6 15945.3 1237.99   1
   8   6   7 255.528 235.518   1
   8  -6   8 79.6674 314.985   2
   8  -6   8 327.358 306.094   4
   8   6   8 405.287 233.343   1
   8  -6   9 3265.72 659.025   2
   8  -6   9 3365.28 669.173   4
   8   6   9 2918.82 512.117   1
   8  -6  10 4532.39 793.077   2
   8  -6  10 6364.94 915.230   4
   8   6  10 4527.57 634.889   1
   8  -6  11 5694.58 931.185   2
   8  -6  11 6802.90 980.149   4
   8  -6  12 1576.00 593.824   4
   8  -6  12 1545.38 575.361   2
   8  -6  13 1748.58 573.786   4
   8  -6  13 438.889 344.231   2
   8  -6  14 3816.35 787.101   2
   8  -7 -17 1.59283 379.630   3
   8  -7 -16 2483.80 752.358   3
   8   7 -16 2191.15 616.359   1
   8  -7 -15 31.8991 317.638   3
   8   7 -15-692.523 400.589   1
   8   7 -14 14371.0 1417.18   1
   8  -7 -14 14745.4 1455.27   3
   8   7 -13 1948.69 547.314   1
   8  -7 -13 1149.01 426.661   3
   8   7 -12 1649.93 484.958   1
   8  -7 -12 1716.30 504.351   3
   8   7 -11-106.989 234.659   1
   8  -7 -11 26.8092 276.009   3
   8   7 -10 7775.96 1006.19   1
   8  -7 -10 9610.39 1047.84   3
  -8  -7   9 435.000 155.202   2
   8   7  -9 62.2747 234.555   1
   8  -7  -9 692.181 380.685   3
   8   7  -8 3258.57 650.370   1
   8  -7  -8 3935.83 664.493   3
   8   7  -7-68.3202 301.504   1
   8   7  -6 40029.3 2282.57   1
  -8  -7   6 37504.8 1768.05   2
   8   7  -5 168.526 210.897   1
  -8  -7   5-18.3284 138.219   2
   8   7  -4 11724.5 1146.93   1
  -8  -7   4 11747.4 949.123   2
   8   7  -3-54.8733 212.154   1
   8   7  -2 13247.8 1211.28   1
   8   7  -1 1652.96 454.994   1
   8   7   0 19580.3 1491.83   1
   8   7   1 7710.07 922.714   1
  -8   7  -1 6961.97 463.077   3
  -8   7  -2 8023.20 457.977   3
   8   7   2 10572.8 1055.61   1
   8   7   3-359.261 273.909   1
  -8   7  -3 57.2671 52.3952   3
  -8   7  -4 19900.3 673.263   3
   8   7   4 33746.3 1904.32   1
   8   7   5 380.585 239.685   1
   8   7   6 378.840 251.814   1
   8   7   7 1109.29 406.165   1
   8   7   8 11633.3 1123.61   1
   8  -7   9 1190.47 461.862   2
   8  -7   9 1101.85 413.009   4
   8   7   9 769.888 318.429   1
   8  -7  10 2315.33 569.729   2
   8  -7  10 2057.04 601.723   4
   8  -7  11-325.132 382.959   2
   8  -7  11 60.4718 327.356   4
   8  -7  12 3360.32 777.593   2
   8  -7  12 3825.04 766.179   4
   8  -7  13-17.1185 429.540   2
   8  -7  14 1293.07 528.567   2
   8  -8 -16 298.589 342.258   3
   8   8 -16 1052.64 452.783   1
   8  -8 -15 1251.42 470.673   3
   8   8 -15 1493.80 523.028   1
   8  -8 -14 1376.59 515.783   3
   8   8 -14 472.119 332.843   1
   8  -8 -13 7270.85 1039.08   3
   8   8 -13 7671.73 1095.81   1
   8   8 -12 2359.15 615.681   1
   8  -8 -12 1640.13 520.663   3
   8   8 -11 259.553 298.602   1
   8  -8 -11 177.797 330.523   3
   8   8 -10 246.097 286.529   1
   8  -8 -10 279.367 261.934   3
   8   8  -9 3849.55 740.162   1
   8   8  -8 4386.62 782.674   1
  -8  -8   8 4139.44 504.153   2
   8   8  -7 12919.7 1299.15   1
  -8  -8   7 13410.4 966.915   2
   8   8  -6-9.17827 266.645   1
  -8  -8   6 248.193 139.130   2
   8   8  -5 9175.33 1067.99   1
   8   8  -4 1674.64 462.849   1
   8   8  -3 8591.78 1026.10   1
   8   8  -2-314.313 278.049   1
  -8   8   2 170.911 128.057   3
   8   8  -1 8495.81 1008.50   1
  -8   8   1 8020.22 661.692   3
  -8   8   0 13041.5 811.446   3
   8   8   0 13519.2 1266.74   1
   8   8   1 2658.91 588.459   1
  -8   8  -1 2534.43 322.615   3
   8   8   2 131.861 219.376   1
  -8   8  -2 326.885 130.481   3
   8   8   3 2124.25 522.108   1
   8   8   4 16044.7 1398.32   1
   8   8   5 4949.26 786.124   1
   8   8   6 503.325 332.936   1
   8   8   7 793.632 361.194   1
   8   8   8 4858.25 754.721   1
   8  -8   9 5979.22 958.377   4
   8   8   9 4720.82 735.504   1
   8  -8  10 840.856 430.118   2
   8  -8  10 1692.67 573.386   4
   8  -8  11 1396.81 534.990   2
   8  -8  11 4008.19 836.629   4
   8  -8  12 744.882 386.560   2
   8  -8  13 833.254 479.402   2
   8   9 -16 994.967 462.096   1
   8   9 -15 2979.97 745.464   1
   8  -9 -15 3320.32 819.671   3
   8   9 -14 690.569 418.717   1
   8   9 -13 5197.83 875.752   1
   8   9 -12 710.410 391.362   1
   8   9 -11 4842.66 878.778   1
   8   9 -10 235.228 290.535   1
   8   9  -9 10239.0 1254.40   1
   8   9  -8 3309.70 712.910   1
   8   9  -7 11066.3 1274.27   1
   8   9  -6 269.415 362.825   1
   8   9  -5 20540.6 1706.59   1
   8   9  -4 1367.99 482.728   1
   8   9  -3 413.904 333.848   1
   8   9  -2-268.849 277.292   1
  -8   9   2 207.367 179.314   3
   8   9  -1 12301.4 1265.70   1
  -8   9   1 10325.1 808.005   3
   8   9   0 4583.97 765.579   1
   8   9   1 234.786 218.014   1
   8   9   2 18032.1 1582.65   1
   8   9   3 6701.42 951.613   1
   8   9   4 1774.98 533.418   1
   8   9   5 3760.76 717.139   1
   8   9   6 864.437 389.258   1
   8   9   7 2524.57 597.565   1
   8   9   8 1004.11 395.183   1
   8  -9   9 6296.86 983.197   4
   8   9   9 6166.06 880.802   1
   8  -9  10 122.494 331.814   4
   8  -9  11 1789.04 576.423   2
   8  -9  12-628.090 433.016   2
   8  10 -15 333.106 448.612   1
   8  10 -14 6.65865 297.191   1
   8  10 -13-64.4427 338.433   1
   8  10 -12 8770.18 1255.09   1
   8  10 -11 771.113 469.974   1
   8  10 -10-17.0582 371.036   1
   8  10  -9-28.7262 251.585   1
   8  10  -8 4616.95 870.275   1
   8  10  -7-14.4353 271.645   1
   8  10  -6 844.515 414.412   1
   8  10  -5 316.069 242.811   1
   8  10  -4 6349.95 978.815   1
   8  10  -3 2767.01 650.861   1
   8  10  -2 7310.18 1033.20   1
   8  10  -1 839.422 405.731   1
   8  10   0 9640.91 1198.14   1
   8  10   1-393.785 327.766   1
   8  10   2 10420.5 1217.73   1
   8  10   3-475.786 382.827   1
   8  10   4-669.576 434.889   1
   8  10   5 1922.64 565.054   1
   8  10   6 9263.18 1147.47   1
   8  10   7 623.361 394.986   1
   8  10   8 1248.95 467.604   1
   8 -10   9 307.618 319.344   4
   8 -10  11 1073.31 532.505   2
   8  11 -13 135.249 481.303   1
   8  11 -12 1238.04 545.132   1
   8  11 -11 1126.63 461.257   1
   8  11 -10 1895.35 565.787   1
   8  11  -9 1182.25 459.845   1
   8  11  -8 318.525 330.182   1
   8  11  -7 3793.67 850.500   1
   8  11  -6 6755.02 1088.88   1
   8  11  -5 1812.11 596.788   1
   8  11  -4-578.526 450.755   1
   8  11  -3-102.153 421.641   1
   8  11  -2 4692.51 884.882   1
   8  11  -1 2190.63 614.283   1
   8  11   0 2971.77 638.251   1
   8  11   1 300.823 362.505   1
   8  11   2 1937.22 582.837   1
   8  11   3 1600.79 492.500   1
   8  11   4 4113.97 813.744   1
   8  11   5 849.002 431.564   1
   8  11   6 478.580 364.643   1
   8  11   7 1398.15 444.453   1
   8  11   8 2222.80 636.954   1
   8  12 -10 672.890 480.171   1
   8  12  -9 1408.39 572.157   1
   8  12  -8 534.607 472.762   1
   8  12  -7 12347.2 1516.29   1
   8  12  -6 1229.26 576.895   1
   8  12  -5-173.113 365.287   1
   8  12  -4 112.376 394.209   1
   8  12  -3 12716.6 1519.04   1
   8  12  -2 2815.42 766.022   1
   8  12  -1 5480.22 992.714   1
   8  12   0 846.514 529.735   1
   8  12   1 11094.5 1380.04   1
   8  12   2-40.1308 330.062   1
   8  12   3 4101.96 905.976   1
   8  12   4-280.445 321.397   1
   8  12   5 10567.6 1365.82   1
   8  12   6 386.873 391.032   1
   8  12   7 4125.68 870.351   1
   8  13  -5 718.709 464.553   1
   8  13  -4 5657.64 1085.50   1
   8  13  -3 5.26307 277.210   1
   8  13  -2-254.958 322.987   1
   8  13  -1 4625.66 929.195   1
   8  13   0 5086.69 1000.95   1
   8  13   1-377.871 413.631   1
   8  13   2 768.274 505.910   1
   8  13   3 1976.09 689.579   1
   8  13   4 6369.40 1105.88   1
   8  13   5 528.629 476.841   1
   8  13   6-897.289 476.382   1
   9   0 -18 255.644 410.019   3
   9   0 -17 183.922 351.414   3
   9   0 -17 383.664 266.172   1
   9   0 -16-598.562 306.752   1
   9   0 -15 1409.04 407.272   1
   9   0 -14 0.87785 170.361   1
   9   0 -13 6510.18 797.849   1
   9   0 -12 141.663 180.121   1
   9   0 -12 77.3716 68.9972   2
   9   0 -11 141.043 187.961   1
   9   0 -11 238.959 106.183   2
   9   0 -10 129.098 140.135   2
   9   0 -10-12.8718 205.364   1
   9   0  -9 4455.86 445.500   2
   9   0  -9 5217.51 697.663   1
   9   0  -8 208.673 131.006   2
   9   0  -8-91.1850 196.721   1
   9   0  -7 14916.9 918.339   2
   9   0  -7 15849.1 1209.43   1
   9   0  -6 421.030 194.759   2
   9   0  -6 145.050 170.710   1
   9   0  -5 31402.8 1778.82   1
   9   0  -5 31706.2 1518.34   2
   9   0  -4 133.654 174.590   2
   9   0  -4 109.119 186.489   1
   9   0  -3 35176.5 1854.92   1
   9   0  -3 32337.8 1627.10   2
   9   0  -2 17.3351 164.427   2
   9   0  -2-278.239 260.296   1
   9   0  -1 87772.7 3351.18   1
   9   0  -1 89595.0 3258.61   2
   9   0   0 521.519 262.010   2
   9   0   0 64.2069 207.647   1
   9   0   1 21494.7 1357.61   1
   9   0   1 20122.9 1343.14   2
   9   0   2 80.9285 77.4278   3
   9   0   2 153.625 218.671   1
   9   0   2 168.036 228.791   2
   9   0   3 13101.5 1016.40   1
   9   0   3 11413.3 525.763   3
   9   0   3 12780.7 1085.77   2
   9   0   4 33.9718 141.639   4
   9   0   4 146.276 220.653   1
   9   0   4 484.583 304.602   2
   9   0   5 41179.5 1875.48   4
   9   0   5 38140.6 2114.37   2
   9   0   5 36731.0 1866.96   1
   9   0   6-95.0718 201.926   1
   9   0   6-48.2107 177.414   4
   9   0   6-90.5248 255.352   2
   9   0   7 3184.19 519.966   4
   9   0   7 3473.79 518.235   1
   9   0   8-54.6335 190.390   4
   9   0   8-294.153 200.036   1
   9   0   9 7719.54 842.636   4
   9   0   9 7683.89 738.444   1
   9   0  10-64.6872 130.257   1
   9   0  10 350.001 267.651   4
   9   0  11 276.457 220.517   4
   9   0  12 483.887 324.665   4
   9   0  13 12042.6 1230.35   4
   9   0  14-35.5763 263.749   4
   9  -1 -18 98.3928 404.876   3
   9  -1 -17 112.752 173.961   1
   9  -1 -17 616.140 493.635   3
   9   1 -17 336.503 235.571   1
   9  -1 -16 2562.16 505.634   1
   9  -1 -16 2255.90 645.729   3
   9   1 -16 3453.32 587.875   1
   9   1 -15 11501.1 1091.11   1
   9  -1 -15 10122.6 1008.31   1
   9  -1 -15 9888.33 1160.92   3
   9   1 -14 7033.74 859.625   1
   9  -1 -14 6741.61 827.124   1
   9  -1 -13 577.046 154.970   2
   9   1 -13-26.3828 202.368   1
   9  -1 -13 604.281 328.525   1
   9  -1 -12 248.297 98.1604   2
   9  -1 -12 72.5011 179.250   1
   9   1 -12 453.907 208.071   1
   9   1 -11 12955.1 1151.97   1
   9  -1 -11 13473.7 1147.64   1
   9  -1 -10 6685.40 797.834   1
   9   1 -10 5553.81 749.047   1
   9  -1  -9-28.5033 179.647   1
   9   1  -9 481.039 280.896   1
   9   1  -9 167.693 118.594   2
   9   1  -8 995.878 302.177   1
   9   1  -8 1322.76 251.507   2
   9  -1  -8 1491.10 413.256   1
   9  -1  -7 11645.2 1032.14   1
   9   1  -7 11144.1 1025.90   1
   9   1  -7 11418.9 767.879   2
   9   1  -6 7564.36 823.957   1
   9  -1  -6 6078.69 735.266   1
   9   1  -6 6594.25 599.645   2
   9   1  -5 2557.06 490.424   1
   9  -1  -5 3364.11 542.736   1
   9   1  -5 2626.13 392.804   2
   9  -1  -4 1388.71 297.335   2
   9   1  -4 906.491 309.594   1
   9  -1  -4 927.517 275.148   1
   9   1  -4 1038.96 287.637   2
   9  -1  -3 15913.0 1196.32   1
   9   1  -3 18062.0 1263.88   1
   9   1  -3 16917.9 1093.20   2
   9  -1  -3 17471.4 1129.19   2
   9  -1  -2 3034.25 459.660   2
   9   1  -2 2973.21 521.158   1
   9  -1  -2 2396.75 437.502   1
   9   1  -2 2802.07 430.225   2
   9  -1  -1 8080.27 801.998   2
   9  -1  -1 8487.99 835.971   1
   9   1  -1 9067.92 877.678   1
   9   1  -1 9509.24 852.054   2
   9  -1   0 1074.63 281.538   2
   9   1   0 1355.76 362.809   1
   9  -1   0 1033.78 311.376   1
   9   1   0 1196.45 328.588   2
   9  -1   1 1018.10 335.753   2
   9   1   1 1988.39 421.794   1
   9  -1   1 1237.51 330.546   1
   9   1   1 1188.88 333.021   2
   9  -1   2 50931.8 2278.98   1
   9   1   2 47058.0 1739.62   3
   9   1   2 52577.5 2324.87   1
   9   1   2 54923.9 2417.49   2
   9  -1   2 52007.1 2396.71   2
   9   1   3 18510.7 1055.84   4
   9  -1   3 16012.9 1161.79   1
   9   1   3 17649.3 868.447   3
   9   1   3 16885.6 1196.08   1
   9   1   3 17181.0 1276.53   2
   9  -1   3 16650.7 1275.58   2
   9   1   4 10832.6 834.443   4
   9  -1   4 12431.9 980.984   1
   9   1   4 12093.3 709.387   3
   9   1   4 10620.9 918.151   1
   9  -1   4 12004.3 1096.17   2
   9  -1   5 1624.90 363.659   1
   9  -1   5 1860.65 406.972   4
   9   1   5 2214.27 413.167   4
   9   1   5 2058.64 303.638   3
   9   1   5 2233.40 431.844   1
   9  -1   5 1414.61 428.059   2
   9  -1   6 5358.72 653.993   4
   9   1   6 4736.38 579.565   4
   9   1   6 4762.78 608.292   1
   9  -1   6 4394.43 566.453   1
   9  -1   6 4780.56 738.381   2
   9  -1   7 419.735 247.093   4
   9   1   7 388.247 179.493   4
   9   1   7 609.421 225.740   1
   9  -1   7 636.183 239.345   1
   9  -1   7 284.708 283.350   2
   9  -1   8 11630.7 1038.16   4
   9   1   8 9052.10 859.537   4
   9   1   8 8974.30 801.511   1
   9  -1   8 9597.60 855.082   1
   9  -1   8 9044.89 1052.01   2
   9  -1   9 2851.16 448.198   1
   9   1   9 2764.79 449.354   1
   9  -1   9 3356.20 579.709   4
   9   1   9 3130.80 516.250   4
   9   1  10 11823.0 898.984   1
   9  -1  10 12084.9 1128.51   4
   9   1  10 12349.4 1105.94   4
   9  -1  10 12972.2 952.243   1
   9  -1  11 2991.21 579.972   4
   9   1  11 1533.46 410.118   4
   9  -1  12 4482.81 747.609   4
   9   1  12 3617.52 630.790   4
   9  -1  13 4732.61 774.908   4
   9   1  13 4245.44 730.366   4
   9  -1  14-515.078 444.796   4
   9   1  14 335.583 339.791   4
   9  -2 -18 2294.60 701.824   3
   9  -2 -17 229.039 220.753   1
   9   2 -17 343.424 249.180   1
   9  -2 -17 480.399 430.784   3
   9   2 -16 337.454 313.558   1
   9  -2 -16 663.524 428.720   3
   9  -2 -16 113.183 177.943   1
   9  -2 -15-72.8612 305.517   3
   9   2 -15-50.6362 318.580   1
   9  -2 -15 63.4566 200.845   1
   9   2 -14 20629.3 1543.70   1
   9  -2 -14 21559.9 1691.19   3
   9  -2 -14 20067.0 1456.34   1
   9  -2 -13 504.534 268.246   1
   9  -2 -13 139.025 281.032   3
   9   2 -13 694.995 361.296   1
   9   2 -12 894.063 353.318   1
   9  -2 -12 1320.72 405.128   3
   9  -2 -12 1000.18 359.139   1
   9  -2 -11 13708.5 1168.80   1
   9   2 -11 12036.1 1125.17   1
   9   2 -11 12724.9 870.859   4
   9  -2 -11 12957.9 1155.83   3
   9  -2 -10 4037.03 629.647   1
   9   2 -10 3710.44 631.776   1
   9   2 -10 4519.26 483.927   4
   9  -2 -10 4331.02 656.575   3
   9  -2  -9 15130.2 1207.97   1
   9   2  -9 14280.7 1197.45   1
   9  -2  -9 13717.2 1085.33   3
   9  -2  -8 11891.2 1055.97   1
   9   2  -8 10687.8 1025.31   1
   9  -2  -8 10580.8 913.278   3
   9  -2  -7 10200.7 972.950   1
   9   2  -7 8433.65 897.881   1
   9   2  -6 21051.7 1457.16   1
   9  -2  -6 23457.4 1484.37   1
   9  -2  -5 2018.49 437.739   1
   9  -2  -5 1973.20 332.204   3
   9   2  -5 2683.14 513.717   1
   9  -2  -4 28146.9 1637.05   1
   9  -2  -4 26530.7 1237.46   3
   9   2  -4 28246.1 1677.52   1
   9  -2  -3 22157.7 1019.66   3
   9   2  -3 21399.8 1426.37   1
   9  -2  -2 473.068 144.111   3
   9   2  -2 308.696 252.653   1
   9  -2  -1 46.5210 55.8426   3
   9   2  -1 92.1093 178.863   1
   9   2   0 20073.8 1354.83   1
   9  -2   0 21266.0 1375.71   2
   9   2   1 15699.2 1169.80   1
   9  -2   1 16501.6 1218.16   2
   9  -2   2 369.963 294.076   2
   9   2   2 366.029 241.040   1
   9   2   3 11363.4 949.898   1
   9   2   3 10883.9 747.576   3
   9  -2   3 13341.1 1114.92   2
   9  -2   4 8386.82 926.985   2
   9   2   4 7746.01 653.204   4
   9   2   4 7604.06 773.827   1
   9   2   4 7753.87 628.366   3
   9  -2   4 8544.00 815.282   1
   9  -2   5 1704.34 448.376   2
   9  -2   5 1707.27 383.305   1
   9   2   5 1880.18 391.597   1
   9   2   5 2011.20 342.821   4
   9   2   5 1979.63 346.479   3
   9  -2   6 331.055 338.839   2
   9   2   6 205.656 204.284   1
   9  -2   6 103.820 209.901   4
   9  -2   6 79.3383 164.283   1
   9   2   6 475.882 221.906   4
   9   2   6 107.647 142.093   3
   9   2   7 12270.4 1005.32   1
   9  -2   7 15325.7 1194.84   4
   9   2   7 13221.2 999.212   4
   9  -2   7 13382.4 1043.62   1
   9  -2   7 15481.6 1322.87   2
   9  -2   8 4435.73 588.991   1
   9  -2   8 4557.68 674.872   4
   9   2   8 3529.62 531.220   4
   9   2   8 4074.25 560.626   1
   9  -2   8 4362.79 733.115   2
   9  -2   9 511.523 322.170   4
   9   2   9 312.651 243.317   4
   9   2   9 1412.91 360.317   1
   9  -2   9 1293.97 325.445   1
   9  -2   9 1313.57 428.123   2
   9  -2  10 9143.87 1019.18   4
   9   2  10 9190.15 933.037   4
   9   2  10 7638.92 712.072   1
   9  -2  10 7497.13 1010.77   2
   9  -2  10 7684.17 760.557   1
   9  -2  11 3087.59 600.650   4
   9   2  11 2079.37 483.388   4
   9  -2  12 5600.21 846.918   4
   9   2  12 3779.08 656.241   4
   9  -2  13 42.4877 258.266   4
   9   2  13-80.0754 267.970   4
   9  -2  14 4250.24 787.341   4
   9   2  14 4929.58 824.623   4
   9  -3 -18 320.969 470.022   3
   9   3 -17 1514.96 442.184   1
   9  -3 -17 1297.42 609.658   3
   9   3 -16 396.618 225.891   1
   9  -3 -16-140.948 426.287   3
   9  -3 -16 382.887 227.473   1
   9  -3 -15 214.270 203.203   1
   9   3 -15 362.207 279.603   1
   9  -3 -15 462.254 419.729   3
   9  -3 -14-116.157 218.208   1
   9  -3 -14 18.6784 288.643   3
   9   3 -14 242.031 244.567   1
   9  -3 -13 2469.68 601.055   3
   9   3 -13 2638.81 564.458   1
   9  -3 -13 3286.33 572.323   1
   9  -3 -12 5779.66 815.075   3
   9  -3 -12 5520.73 734.911   1
   9   3 -12 6113.27 844.577   1
   9   3 -11 4647.40 487.469   4
   9  -3 -11 3549.59 603.447   3
   9   3 -11 5298.02 770.031   1
   9  -3 -11 4112.29 639.851   1
   9   3 -10 5812.53 524.922   4
   9  -3 -10 4881.72 689.083   3
   9  -3 -10 5863.09 758.034   1
   9   3 -10 5822.31 809.115   1
   9   3  -9 7135.67 863.574   1
   9   3  -9 6759.84 537.634   4
   9  -3  -9 7410.77 789.562   3
   9  -3  -9 6687.08 820.567   1
   9   3  -8 1278.81 378.926   1
   9   3  -8 1315.21 224.596   4
   9  -3  -8 1394.68 348.347   3
   9   3  -7 42654.4 2237.74   1
   9  -3  -7 42187.0 1917.64   3
   9   3  -6 5628.65 759.476   1
   9   3  -5-49.0561 194.221   1
   9   3  -4 3161.96 536.573   1
   9  -3  -4 3942.67 433.834   3
   9   3  -3 35265.8 1886.54   1
   9  -3  -3 34077.2 1387.08   3
   9   3  -2 1373.94 387.863   1
   9  -3  -2 1151.16 188.972   3
   9   3  -1 4361.07 622.682   1
   9   3   0 1329.74 390.047   1
   9   3   0 797.149 178.324   4
   9   3   1 12164.3 708.352   4
   9   3   1 13042.9 1067.21   1
   9   3   2 4091.21 588.756   1
   9   3   3 19842.6 1339.95   1
   9   3   3 19768.9 1186.79   3
   9  -3   3 19164.8 1416.46   2
   9   3   4 6939.09 783.841   1
   9  -3   4 9885.20 1006.73   2
   9   3   4 7492.54 622.804   4
   9   3   4 8421.02 745.930   3
   9  -3   5 1974.60 521.469   2
   9   3   5 1737.67 319.041   4
   9   3   5 1403.67 332.255   3
   9   3   5 1255.31 338.020   1
   9  -3   6 835.957 339.418   2
   9   3   6 1653.23 331.354   4
   9   3   6 1364.88 319.233   3
   9   3   6 1955.76 418.308   1
   9  -3   7 4022.61 694.932   2
   9  -3   7 4980.09 730.052   4
   9   3   7 4003.30 534.185   4
   9   3   7 3990.95 558.393   3
   9   3   7 3929.51 549.278   1
   9  -3   8 7566.91 901.100   4
   9  -3   8 5173.40 637.848   1
   9   3   8 6045.18 678.909   4
   9   3   8 6688.67 735.258   1
   9  -3   8 5544.96 856.394   2
   9  -3   9 594.287 267.221   1
   9  -3   9 261.003 250.573   4
   9   3   9 321.061 194.518   1
   9   3   9 121.374 212.480   4
   9  -3   9 67.5604 283.233   2
   9   3  10 762.789 226.643   1
   9  -3  10 1175.65 330.235   1
   9  -3  10 1427.62 476.955   4
   9   3  10 908.152 327.473   4
   9  -3  10 1296.45 413.244   2
   9  -3  11 17008.5 1469.08   4
   9   3  11 16569.6 1335.14   4
   9  -3  11 15025.8 1488.66   2
   9  -3  12 35.6593 240.117   4
   9   3  12 218.794 217.003   4
   9  -3  13 228.507 317.776   4
   9  -4 -18 2110.26 666.587   3
   9   4 -17 8163.26 978.251   1
   9  -4 -17 9147.74 1245.68   3
   9   4 -16 1546.41 505.363   1
   9  -4 -16 964.831 345.251   1
   9  -4 -16 612.812 453.479   3
   9   4 -15 253.947 279.961   1
   9  -4 -15 465.377 350.930   3
   9  -4 -15 654.399 272.523   1
   9  -4 -14 2053.55 518.620   1
   9   4 -14 1179.11 384.316   1
   9  -4 -14 1129.04 434.810   3
   9   4 -13 10753.6 1136.31   1
   9  -4 -13 7935.90 987.526   3
   9  -4 -13 9547.61 1005.65   1
   9   4 -12 4088.80 696.562   1
   9  -4 -12 3145.20 593.049   3
   9  -4 -12 4192.57 680.116   1
   9   4 -11 567.733 152.300   4
   9  -4 -11 855.887 335.749   1
   9  -4 -11 718.912 369.149   3
   9   4 -11 85.6387 214.993   1
   9   4 -10 137.506 105.228   4
   9  -4 -10 370.684 303.535   3
   9   4 -10 313.154 245.399   1
   9   4  -9 9043.79 568.841   4
   9  -4  -9 7963.19 838.674   3
   9   4  -9 9323.45 1026.31   1
   9   4  -8 4094.77 340.939   4
   9  -4  -8 4248.04 596.809   3
   9   4  -8 5492.41 783.583   1
   9   4  -7 15234.3 1314.19   1
   9   4  -7 14811.4 667.946   4
   9  -4  -7 15919.4 1100.95   3
   9   4  -6 10252.8 1039.60   1
   9   4  -6 10543.3 494.053   4
   9   4  -5 635.218 341.613   1
   9   4  -4 12294.2 1135.30   1
   9  -4  -4 14537.8 894.489   3
  -9  -4   4 12533.7 934.169   2
   9   4  -3 15309.5 1241.16   1
   9   4  -3 14564.0 542.486   4
   9  -4  -3 14639.7 850.191   3
  -9  -4   3 13652.5 996.936   2
  -9  -4   2 1183.82 321.687   2
   9   4  -2 1255.46 144.115   4
   9   4  -2 842.495 279.632   1
   9   4  -1 10131.4 980.323   1
   9   4  -1 10712.5 503.278   4
   9   4   0 8881.66 915.047   1
   9   4   0 9752.68 516.672   4
   9   4   1 5602.74 411.838   4
   9   4   1 5804.41 737.233   1
   9   4   2 447.470 147.728   4
   9   4   2 753.872 292.649   1
   9   4   3 245.877 200.130   1
   9   4   3 469.035 235.810   3
   9  -4   4 560.726 257.058   2
   9   4   4 452.626 221.407   1
   9   4   4 194.441 176.575   3
   9   4   5 19463.3 1083.67   4
   9   4   5 18876.7 1255.56   3
   9  -4   5 17319.3 1415.24   2
   9   4   5 17142.6 1272.31   1
   9  -4   6 1478.67 441.016   2
   9   4   6 1615.22 322.787   4
   9   4   6 2010.12 413.943   1
   9   4   6 2198.59 467.380   3
   9  -4   7 6401.63 923.175   2
   9  -4   7 6446.18 866.422   4
   9   4   7 5878.07 718.828   1
   9   4   7 6770.19 673.563   4
   9  -4   8 1787.78 487.314   2
   9  -4   8 2454.48 556.541   4
   9   4   8 2259.45 431.635   1
   9   4   8 2488.26 448.269   4
   9  -4   9 7630.97 1016.53   2
   9   4   9 6385.91 721.293   1
   9  -4   9 8213.18 989.545   4
   9   4   9 7758.63 819.882   4
   9   4  10 316.914 155.995   1
   9  -4  10 394.173 323.937   4
   9  -4  10 271.815 154.266   1
   9  -4  10 266.281 344.568   2
   9  -4  11 1096.91 451.944   4
   9  -4  11 526.084 391.216   2
   9  -4  12-202.915 259.418   4
   9  -4  12-518.068 423.178   2
   9  -4  13 2880.37 690.725   4
   9   5 -17 654.816 348.808   1
   9  -5 -17 273.727 494.968   3
   9   5 -16 3152.54 635.299   1
   9  -5 -16 3185.72 738.423   3
   9  -5 -16 3165.25 572.354   1
   9   5 -15 444.887 233.472   1
   9  -5 -15 1637.93 448.157   1
   9  -5 -15 1148.64 496.956   3
   9  -5 -14 4846.97 725.061   1
   9   5 -14 4852.52 802.097   1
   9  -5 -14 4238.34 778.880   3
   9   5 -13 421.389 317.496   1
   9  -5 -13 689.526 341.603   1
   9  -5 -13 305.979 365.336   3
   9   5 -12 1041.94 384.784   1
   9  -5 -12 1723.24 520.860   3
   9   5 -11 119.153 260.986   1
   9  -5 -11 49.4313 256.295   3
   9   5 -10 11836.4 664.824   4
   9  -5 -10 11338.1 1079.28   3
   9   5 -10 12882.6 1268.99   1
   9   5  -9 284.372 86.3618   4
   9   5  -9 498.791 300.915   1
   9  -5  -9 284.671 271.859   3
   9   5  -8 361.073 90.6995   4
   9   5  -8 392.802 274.079   1
   9   5  -7 208.619 248.034   1
   9  -5  -7 540.074 283.727   3
   9   5  -6 8905.89 991.769   1
   9  -5  -6 8745.43 823.598   3
  -9  -5   5 1547.43 312.033   2
   9   5  -5 1060.80 302.907   1
  -9  -5   4 4915.57 583.332   2
   9   5  -4 5865.94 801.707   1
   9  -5  -4 5936.58 613.310   3
  -9  -5   3 478.512 203.390   2
   9   5  -3 215.542 282.040   1
   9   5  -2 66904.0 3002.77   1
   9   5  -1 607.100 188.426   1
   9   5   0 269.953 275.044   1
   9   5   1 1026.14 315.406   1
   9   5   2 15472.5 1267.24   1
   9   5   3 254.355 204.271   1
   9   5   4 5170.89 697.250   1
   9   5   4 4820.32 657.630   3
   9   5   5 2130.33 465.344   1
   9   5   6 20664.7 1459.18   1
   9  -5   6 23506.4 1707.81   2
   9  -5   7 2895.50 611.096   2
   9   5   7 3868.21 606.020   1
   9  -5   8 5905.23 885.404   2
   9   5   8 6456.85 777.229   1
   9  -5   8 7680.22 994.703   4
   9  -5   9 1133.70 438.151   2
   9   5   9 1184.98 377.661   1
   9  -5   9 2061.48 542.518   4
   9  -5  10 5232.81 891.551   2
   9  -5  10 9366.23 1109.45   4
   9  -5  11 2756.23 690.272   4
   9  -5  11 859.036 476.799   2
   9  -5  12 6786.57 1018.30   4
   9  -5  12 5461.95 957.032   2
   9  -5  13 137.337 293.756   2
   9   6 -17-377.089 354.968   1
   9  -6 -17-354.400 504.123   3
   9   6 -16 459.676 257.267   1
   9  -6 -16 34.8664 192.243   1
   9   6 -15-2.57235 222.500   1
   9  -6 -15-152.413 239.861   1
   9  -6 -15-28.9204 397.949   3
   9   6 -14-244.044 305.328   1
   9  -6 -14 249.655 304.889   1
   9  -6 -14 147.430 307.841   3
   9   6 -13 5159.46 849.112   1
   9  -6 -13 5915.82 912.307   3
   9   6 -12 539.461 347.568   1
   9  -6 -12 928.030 448.504   3
   9   6 -11 427.416 292.040   1
   9  -6 -11-78.3828 244.105   3
   9   6 -10 2898.70 621.357   1
   9  -6 -10 2707.16 581.648   3
   9   6  -9 10501.5 1162.70   1
   9  -6  -9 9976.56 1036.40   3
   9  -6  -8 18534.6 1371.98   3
   9   6  -8 19863.5 1592.39   1
   9   6  -7 43.5835 283.570   1
   9  -6  -7-85.5865 216.084   3
  -9  -6   6 1032.21 255.953   2
   9   6  -6 844.350 365.084   1
   9  -6  -6 1097.57 315.001   3
  -9  -6   5 4433.41 564.818   2
   9   6  -5 3890.82 684.760   1
   9   6  -4 21036.6 1608.70   1
  -9  -6   4 22412.6 1355.88   2
   9   6  -3 619.470 328.845   1
   9   6  -2 1872.91 458.279   1
   9   6  -1 6132.23 805.689   1
   9   6   0 9042.00 996.846   1
   9   6   1 13000.3 1188.47   1
   9   6   2 6759.50 853.144   1
   9   6   3 17592.0 1386.25   1
   9   6   4 11143.6 1073.67   1
   9   6   5 21569.8 1545.57   1
   9   6   6 8683.04 955.178   1
   9   6   7 1591.59 418.235   1
   9  -6   7 1499.04 451.915   2
   9   6   8 2626.83 506.232   1
   9  -6   8 2071.59 575.881   2
   9  -6   8 3201.42 692.407   4
   9  -6   9 11422.6 1248.73   4
   9   6   9 9019.83 953.523   1
   9  -6  10 6804.04 1043.52   2
   9  -6  10 9295.42 1164.42   4
   9  -6  11 625.691 372.790   2
   9  -6  11 1379.52 508.240   4
   9  -6  12 416.241 385.745   4
   9  -6  12-708.789 395.557   2
   9  -6  13 6662.89 1089.72   2
   9  -6  14 1072.30 553.872   2
   9   7 -17 450.820 382.671   1
   9  -7 -16 203.230 368.303   3
   9   7 -16-144.481 427.010   1
   9  -7 -15 2394.96 552.260   1
   9   7 -15 3494.50 740.221   1
   9  -7 -15 2879.94 732.979   3
   9   7 -14-55.3158 288.047   1
   9  -7 -14 39.1826 373.685   3
   9   7 -13-67.6274 295.022   1
   9  -7 -13 307.109 306.009   3
   9   7 -12 1677.90 505.534   1
   9  -7 -12 1424.67 504.074   3
   9   7 -11 10089.5 1195.39   1
   9  -7 -11 9960.12 1109.31   3
   9   7 -10 344.505 329.640   1
   9  -7 -10 454.174 347.437   3
   9   7  -9 12222.0 1290.52   1
   9  -7  -9 11221.4 1142.27   3
   9   7  -8 55.6909 320.106   1
   9  -7  -8 650.432 299.853   3
   9   7  -7 12948.6 1291.11   1
  -9  -7   7 12489.0 935.077   2
  -9  -7   6-10.1774 185.290   2
   9   7  -6 259.001 284.517   1
   9   7  -5 20885.8 1621.95   1
  -9  -7   5 20545.4 1298.85   2
   9   7  -4 443.190 315.893   1
   9   7  -3 672.607 342.580   1
   9   7  -2 3665.26 668.729   1
   9   7  -1 22500.8 1658.41   1
   9   7   0 3319.28 638.194   1
   9   7   1 271.727 283.879   1
   9   7   2 1009.69 364.708   1
   9   7   3 30544.4 1947.61   1
   9   7   4-254.204 307.711   1
   9   7   5 770.124 287.319   1
   9   7   6 5212.92 794.787   1
   9   7   7 11863.3 1163.94   1
   9  -7   8 1729.02 545.876   2
   9   7   8 1531.97 433.371   1
   9  -7   9 2418.52 602.997   2
   9  -7   9 3683.31 721.676   4
   9   7   9 3119.59 620.579   1
   9  -7  10-725.748 448.806   2
   9  -7  10-78.9312 334.685   4
   9  -7  11 7316.19 1109.75   2
   9  -7  11 11182.2 1321.20   4
   9  -7  12-73.8839 342.072   2
   9  -7  13-711.714 569.796   2
   9  -8 -16 485.294 448.472   3
   9   8 -16-6.13611 262.577   1
   9  -8 -15 223.328 363.486   3
   9   8 -15 312.526 354.878   1
   9  -8 -14 1867.89 619.228   3
   9   8 -14 1863.18 542.678   1
   9   8 -13 1285.13 502.426   1
   9  -8 -13-31.7250 370.816   3
   9   8 -12 365.595 334.620   1
   9  -8 -12 97.6762 292.769   3
   9   8 -11-487.948 346.254   1
   9  -8 -11-59.2934 322.068   3
   9   8 -10 2589.19 610.042   1
   9  -8 -10 1809.38 506.286   3
   9   8  -9 4966.86 868.099   1
   9   8  -8 1129.90 425.639   1
   9   8  -7 286.351 289.901   1
   9   8  -6 5644.38 885.392   1
   9   8  -5 5392.28 864.574   1
   9   8  -4 10927.6 1196.24   1
   9   8  -3 400.508 347.531   1
   9   8  -2 380.486 248.447   1
   9   8  -1 10740.7 1177.84   1
   9   8   0 12033.2 1252.91   1
   9   8   1 6263.97 884.251   1
   9   8   2 6288.78 902.083   1
   9   8   3 12033.2 1232.97   1
   9   8   4 4562.16 772.620   1
   9   8   5-110.873 278.906   1
   9   8   6 4671.93 786.728   1
   9   8   7-247.552 306.452   1
   9   8   8 9414.55 1086.18   1
   9  -8   9 13660.9 1454.49   4
   9   8   9 11159.8 1145.51   1
   9  -8  10 1707.80 593.690   2
   9  -8  10 2551.27 676.924   4
   9  -8  11 124.327 330.071   2
   9  -8  12 363.931 316.269   2
   9   9 -16 974.697 523.656   1
   9  -9 -15 993.498 548.998   3
   9   9 -15 429.742 336.834   1
   9   9 -14 4973.44 977.908   1
   9   9 -13 3288.65 793.928   1
   9   9 -12 2677.53 708.145   1
   9   9 -11 1092.41 483.105   1
   9   9 -10 6872.98 1046.89   1
   9   9  -9 778.946 457.315   1
   9   9  -8 2393.64 632.051   1
   9   9  -7-551.041 372.847   1
   9   9  -6 2375.12 608.293   1
   9   9  -5 293.679 266.845   1
   9   9  -4 1490.12 503.101   1
   9   9  -3 4552.11 808.816   1
   9   9  -2 15806.4 1510.21   1
   9   9  -1 1642.12 531.928   1
   9   9   0 2833.40 663.678   1
   9   9   1 3092.56 678.629   1
   9   9   2 7342.99 1036.08   1
   9   9   3 425.434 299.112   1
   9   9   4 6751.08 981.070   1
   9   9   5 1144.04 486.538   1
   9   9   6 5789.76 885.210   1
   9   9   7 1826.60 564.509   1
   9   9   8 8653.44 1080.51   1
   9  -9   9 898.404 517.766   4
   9  -9  10 1077.68 498.603   2
   9  -9  11 1593.60 567.368   2
   9  10 -15 1.78530 309.034   1
   9  10 -14 322.103 425.437   1
   9  10 -13 5286.50 980.013   1
   9  10 -12 439.583 418.523   1
   9  10 -11 302.597 399.245   1
   9  10 -10-183.023 319.585   1
   9  10  -9 11269.6 1393.53   1
   9  10  -8-9.41272 261.984   1
   9  10  -7 9712.39 1277.11   1
   9  10  -6 2396.90 663.406   1
   9  10  -5 844.142 337.289   1
   9  10  -4 3743.20 816.510   1
   9  10  -3 3308.82 734.809   1
   9  10  -2 1024.27 495.391   1
   9  10  -1 5106.31 929.979   1
   9  10   0 1065.11 496.018   1
   9  10   1 3469.49 754.644   1
   9  10   2 558.964 433.177   1
   9  10   3 333.479 350.233   1
   9  10   4 1084.06 401.717   1
   9  10   5 8959.97 1174.41   1
   9  10   6 648.837 461.405   1
   9  10   7-56.8566 245.121   1
   9  10   8 2631.02 626.298   1
   9  11 -11 2004.19 604.975   1
   9  11 -10 7.12678 359.193   1
   9  11  -9 657.704 541.701   1
   9  11  -8 4351.96 953.154   1
   9  11  -7 7545.91 1203.34   1
   9  11  -6 1355.32 567.527   1
   9  11  -5-83.4355 381.699   1
   9  11  -4 10047.6 1346.48   1
   9  11  -3 8135.25 1205.17   1
   9  11  -2 7662.80 1149.04   1
   9  11  -1 3880.28 801.357   1
   9  11   0 929.783 526.488   1
   9  11   1 2227.39 640.388   1
   9  11   2 4048.13 784.172   1
   9  11   3 8045.96 1165.60   1
   9  11   4 672.959 401.341   1
   9  11   5 1861.46 620.038   1
   9  11   6 1651.85 605.745   1
   9  11   7 6656.09 1034.54   1
   9  12  -7 948.901 555.830   1
   9  12  -6 2163.10 670.165   1
   9  12  -5-136.122 343.958   1
   9  12  -4 6613.06 1126.19   1
   9  12  -3 1503.48 480.274   1
   9  12  -2 495.157 471.141   1
   9  12  -1 2789.40 716.537   1
   9  12   0 12456.1 1512.56   1
   9  12   1 587.064 297.183   1
   9  12   2 4744.59 944.084   1
   9  12   3-289.383 437.988   1
   9  12   4 1376.49 569.209   1
   9  12   5 296.102 386.742   1
   9  12   6 789.507 449.147   1
  10   0 -18 767.623 581.244   3
  10   0 -17-692.835 496.467   3
  10   0 -17-521.423 319.688   1
  10   0 -16 1034.23 353.489   1
  10   0 -15 507.188 349.546   1
  10   0 -14 6816.24 863.521   1
  10   0 -13-134.790 224.180   1
  10   0 -12 847.114 325.941   1
  10   0 -12 423.656 126.389   2
  10   0 -11 251.046 274.276   1
  10   0 -11-40.9845 107.156   2
  10   0 -10 28329.4 1824.07   1
  10   0 -10 28294.1 1308.52   2
  10   0  -9 39.9465 146.333   2
  10   0  -9-24.3908 235.697   1
  10   0  -8 26584.8 1711.96   1
  10   0  -8 24523.1 1286.83   2
  10   0  -7 23.7684 161.362   2
  10   0  -7 184.349 268.372   1
  10   0  -6 46109.5 2009.55   2
  10   0  -6 48559.6 2403.07   1
  10   0  -5-55.6290 219.866   2
  10   0  -5 621.936 296.747   1
  10   0  -4 2422.69 417.919   2
  10   0  -4 2189.46 473.970   1
  10   0  -3-489.588 290.281   2
  10   0  -3-827.234 407.081   1
  10   0  -2 40831.6 2124.26   1
  10   0  -2 40645.5 1984.65   2
  10   0  -1-204.063 260.501   1
  10   0  -1 538.730 296.262   2
  10   0   0 7700.65 841.862   1
  10   0   0 7295.09 807.150   2
  10   0   1-182.458 222.086   1
  10   0   1-83.9061 85.8349   3
  10   0   1 303.310 190.051   2
  10   0   2 40975.1 2104.61   2
  10   0   2 42898.2 2056.17   1
  10   0   3 104.080 256.098   1
  10   0   3-90.5435 234.265   2
  10   0   4 50674.0 2210.57   4
  10   0   4 48694.0 2505.20   2
  10   0   4 48896.7 2331.93   1
  10   0   5 432.749 200.434   1
  10   0   5 64.2613 187.271   4
  10   0   5 627.294 356.043   2
  10   0   6 194.961 183.778   1
  10   0   6-26.8909 223.083   4
  10   0   7-48.6306 197.078   4
  10   0   7-114.170 237.641   1
  10   0   8 35495.6 1945.47   4
  10   0   8 32915.5 1793.78   1
  10   0   9 54.2706 208.631   4
  10   0   9 106.284 189.661   1
  10   0  10 1570.47 368.994   1
  10   0  10 1455.14 451.881   4
  10   0  11-317.633 255.292   4
  10   0  12 16658.0 1468.18   4
  10   0  13-306.457 286.856   4
  10  -1 -18 899.119 542.088   3
  10  -1 -17 2889.37 551.989   1
  10  -1 -17 2483.04 720.833   3
  10   1 -17 2202.03 515.173   1
  10  -1 -16 5136.91 723.655   1
  10  -1 -16 4786.15 863.603   3
  10   1 -16 4615.19 756.137   1
  10   1 -15-37.6483 275.696   1
  10  -1 -15-286.424 441.473   3
  10  -1 -15 629.290 285.964   1
  10   1 -14 186.961 203.589   1
  10  -1 -14 458.395 350.203   3
  10  -1 -14 29.7698 201.278   1
  10   1 -13 6309.39 843.310   1
  10  -1 -13 6151.07 837.616   1
  10  -1 -12 498.898 172.417   2
  10  -1 -12-12.7422 250.043   1
  10   1 -12-170.088 193.451   1
  10   1 -11 18702.1 1468.09   1
  10  -1 -11 20194.4 1489.94   1
  10  -1 -11 18253.7 1022.13   2
  10  -1 -10 3622.59 454.932   2
  10  -1 -10 3432.95 600.101   1
  10   1 -10 3977.48 671.167   1
  10  -1  -9 6135.16 804.577   1
  10   1  -9 6347.30 806.651   1
  10  -1  -9 6350.70 618.087   2
  10  -1  -8 3874.63 479.183   2
  10  -1  -8 3765.88 618.107   1
  10   1  -8 3346.30 622.635   1
  10   1  -8 3523.72 463.629   2
  10  -1  -7 6672.18 658.466   2
  10   1  -7 6026.11 791.342   1
  10   1  -7 6117.72 605.464   2
  10  -1  -7 6607.28 820.316   1
  10  -1  -6 19251.1 1402.51   1
  10   1  -6 18414.2 1384.36   1
  10   1  -6 16349.2 1083.20   2
  10  -1  -6 17183.2 1114.13   2
  10   1  -5 6338.70 790.760   1
  10  -1  -5 6028.62 651.695   2
  10  -1  -5 6418.20 782.961   1
  10   1  -5 6350.87 653.084   2
  10  -1  -4 6120.89 685.322   2
  10   1  -4 7082.57 834.088   1
  10  -1  -4 7552.99 841.451   1
  10   1  -4 7564.71 728.357   2
  10  -1  -3 26090.8 1642.28   1
  10   1  -3 27731.8 1675.07   1
  10   1  -3 24855.1 1458.36   2
  10  -1  -3 24897.7 1477.52   2
  10  -1  -2 707.068 299.778   2
  10   1  -2 758.025 338.426   1
  10  -1  -2 488.605 286.728   1
  10   1  -2 808.081 298.020   2
  10  -1  -1 3154.63 546.518   2
  10   1  -1 3307.86 557.800   1
  10  -1  -1 2993.03 539.048   1
  10   1  -1 3292.47 519.885   2
  10  -1   0 649.337 311.584   2
  10   1   0 1445.82 404.965   1
  10  -1   0 638.647 96.2405   3
  10  -1   0 1001.46 338.966   1
  10   1   0 1365.69 371.284   2
  10  -1   1 8970.58 947.201   2
  10  -1   1 10686.5 995.614   1
  10   1   1 10704.6 980.046   1
  10   1   1 8530.37 894.248   2
  10  -1   2 8836.06 937.326   2
  10  -1   2 11196.7 999.067   1
  10   1   2 9005.77 591.399   3
  10   1   2 10300.4 974.281   1
  10   1   2 9342.37 957.732   2
  10  -1   3 32.6221 168.154   1
  10   1   3 281.692 155.118   4
  10   1   3 309.947 138.986   3
  10   1   3 66.6153 197.856   1
  10  -1   3 263.463 282.737   2
  10  -1   4 143.685 223.777   1
  10   1   4 0.33044 98.1911   3
  10   1   4 41.4361 170.757   1
  10  -1   4 152.943 312.046   2
  10   1   4 68.4391 171.686   4
  10  -1   5 14076.7 1138.49   1
  10  -1   5 17098.1 1210.79   4
  10   1   5 14610.6 1060.95   4
  10   1   5 13907.3 1137.02   1
  10  -1   5 14070.1 1280.36   2
  10  -1   6 1545.35 433.660   4
  10   1   6 1860.58 385.691   4
  10   1   6 1578.21 375.037   1
  10  -1   6 1592.07 377.846   1
  10  -1   6 1814.49 529.788   2
  10  -1   7 7203.15 825.367   4
  10   1   7 5761.16 686.497   4
  10  -1   7 6268.98 727.897   1
  10   1   7 4837.35 637.964   1
  10  -1   7 7040.44 939.054   2
  10  -1   8 768.824 320.176   1
  10   1   8 762.467 280.879   1
  10  -1   8 581.770 314.838   4
  10   1   8 733.461 252.390   4
  10  -1   8 1025.88 430.682   2
  10   1   9 4635.40 610.662   1
  10  -1   9 6455.25 816.519   4
  10   1   9 4657.69 684.050   4
  10  -1   9 4807.07 637.017   1
  10  -1  10 144.893 266.267   4
  10   1  10 89.8206 221.802   4
  10  -1  10 99.9543 156.912   1
  10  -1  11 7283.62 946.300   4
  10   1  11 5563.61 777.007   4
  10  -1  12 604.312 382.410   4
  10   1  12 557.277 326.641   4
  10  -1  13 949.745 427.526   4
  10   1  13 737.340 321.419   4
  10   1  14-334.908 382.883   4
  10  -2 -18-691.381 559.505   3
  10  -2 -17 72.5960 217.257   1
  10   2 -17-138.234 281.154   1
  10  -2 -17-604.029 654.557   3
  10  -2 -16 4197.66 826.750   3
  10   2 -16 4563.36 739.016   1
  10  -2 -16 5264.53 749.401   1
  10  -2 -15 104.072 317.002   3
  10   2 -15 1503.47 488.133   1
  10  -2 -15 894.438 372.754   1
  10  -2 -14-446.201 295.637   1
  10  -2 -14 84.8100 310.675   3
  10   2 -14-406.054 331.613   1
  10   2 -13 1484.46 433.188   1
  10  -2 -13 1283.71 411.455   1
  10  -2 -13 1034.07 411.273   3
  10   2 -12 199.906 253.201   1
  10  -2 -12 147.042 232.873   1
  10  -2 -12-210.614 270.177   3
  10   2 -11 5413.72 799.502   1
  10   2 -11 4972.11 546.523   4
  10  -2 -11 5027.29 726.347   3
  10  -2 -11 5501.41 779.844   1
  10  -2 -10 3535.74 642.411   1
  10   2 -10 3524.92 612.919   1
  10  -2 -10 2903.06 532.644   3
  10  -2  -9 19970.9 1484.41   1
  10   2  -9 19106.3 1467.76   1
  10  -2  -9 17750.5 1284.75   3
  10  -2  -8 987.863 313.616   3
  10   2  -8 532.580 219.809   1
  10  -2  -8 975.236 375.601   1
  10  -2  -7 2931.30 568.548   1
  10  -2  -7 2409.87 416.592   3
  10   2  -7 3304.12 604.454   1
  10  -2  -6 4785.99 721.504   1
  10   2  -6 4893.03 696.982   1
  10  -2  -5 47540.6 2367.98   1
  10   2  -5 46021.3 2365.32   1
  10  -2  -4 3843.37 635.966   1
  10  -2  -4 3714.95 413.175   3
  10   2  -4 4522.77 682.780   1
  10  -2  -3 2519.32 328.894   3
  10  -2  -3 2187.95 459.422   1
  10   2  -3 2475.58 511.706   1
  10  -2  -2 2298.79 479.618   1
  10  -2  -2 1818.51 410.443   2
  10  -2  -2 1663.41 225.030   3
  10   2  -2 2185.88 433.687   1
  10   2  -1 27426.8 1648.42   1
  10  -2  -1 27906.1 1644.11   1
  10  -2  -1 27085.2 1613.16   2
  10  -2   0 1197.79 361.020   2
  10  -2   0 1375.19 366.793   1
  10   2   0 1360.63 355.581   1
  10  -2   1 995.405 327.179   2
  10   2   1 1202.19 348.512   1
  10  -2   1 1512.26 383.266   1
  10  -2   2 374.602 264.713   2
  10   2   2 160.607 155.902   4
  10  -2   2 334.593 261.353   1
  10   2   2 257.186 207.736   1
  10   2   2 294.453 184.790   3
  10  -2   3 5967.90 808.527   2
  10   2   3 5893.86 571.082   4
  10   2   3 5799.23 740.857   1
  10   2   3 5152.70 516.802   3
  10  -2   3 5397.12 678.734   1
  10  -2   4 1134.14 448.186   2
  10   2   4 829.244 247.800   4
  10   2   4 945.415 309.242   1
  10  -2   4 625.277 253.534   1
  10   2   4 1024.60 241.528   3
  10  -2   5 6021.77 852.918   2
  10   2   5 5966.94 725.458   1
  10   2   5 5702.22 613.450   4
  10   2   5 5616.33 555.916   3
  10  -2   5 5043.00 663.336   1
  10   2   6 1872.16 418.710   1
  10  -2   6 2857.87 558.014   4
  10   2   6 2233.32 421.002   4
  10  -2   6 2420.19 467.176   1
  10   2   6 2442.05 400.519   3
  10  -2   6 2355.23 562.669   2
  10  -2   7 30670.6 1767.62   1
  10   2   7 29941.1 1737.33   1
  10   2   7 30546.0 1666.18   4
  10  -2   7 28795.2 2011.10   2
  10  -2   8 804.260 388.225   4
  10   2   8 195.724 220.526   4
  10  -2   8 391.009 234.059   1
  10   2   8 158.434 177.153   1
  10  -2   8 117.399 288.202   2
  10   2   9 9648.14 958.393   4
  10  -2   9 11211.1 1146.15   4
  10  -2   9 10279.6 950.045   1
  10  -2   9 8709.31 1119.18   2
  10   2   9 9772.13 902.284   1
  10  -2  10 1730.36 361.874   1
  10  -2  10 2206.83 530.365   4
  10   2  10 1723.07 441.799   4
  10  -2  11 1820.35 556.917   4
  10   2  11 1289.14 414.833   4
  10  -2  12 1308.18 467.946   4
  10   2  12 153.777 239.720   4
  10  -2  13 8490.47 1102.20   4
  10   2  13 7283.66 985.267   4
  10   2  14 929.108 465.062   4
  10  -3 -18 455.091 418.166   3
  10   3 -17 339.735 320.840   1
  10  -3 -17-405.754 292.939   1
  10   3 -16 774.911 264.593   1
  10  -3 -16 1981.98 605.135   3
  10  -3 -16 1583.36 466.189   1
  10  -3 -15 1551.16 455.682   1
  10   3 -15 1949.78 498.329   1
  10  -3 -15 1285.61 500.790   3
  10  -3 -14 1898.97 506.963   1
  10  -3 -14 768.585 370.890   3
  10   3 -14 2004.43 517.290   1
  10  -3 -13 933.776 351.015   3
  10  -3 -13 962.585 340.767   1
  10   3 -13 676.582 345.485   1
  10  -3 -12 7886.90 952.593   1
  10  -3 -12 7501.20 929.042   3
  10   3 -12 8531.87 1021.18   1
  10   3 -11 7213.15 616.972   4
  10  -3 -11 7616.58 934.404   1
  10  -3 -11 5861.33 787.162   3
  10   3 -11 6588.93 892.331   1
  10  -3 -10 2832.60 593.516   1
  10   3 -10 2175.62 508.954   1
  10   3 -10 2336.99 327.151   4
  10  -3 -10 2228.01 464.925   3
  10   3  -9 2972.24 608.390   1
  10   3  -9 2538.73 337.562   4
  10  -3  -9 2732.54 518.855   3
  10  -3  -9 2505.32 517.788   1
  10   3  -8 20316.7 1547.32   1
  10  -3  -8 18286.4 1256.67   3
  10  -3  -8 21399.7 1529.69   1
  10  -3  -7 1221.66 426.507   1
  10   3  -7 1571.52 458.972   1
  10  -3  -7 794.235 277.680   3
  10   3  -6 2151.37 482.884   1
  10   3  -5 2177.15 490.943   1
  10   3  -4 7025.15 860.824   1
  10  -3  -4 7278.17 603.979   3
  10   3  -3 12135.8 1114.97   1
  10  -3  -3 11105.2 701.340   3
  10   3  -2 9554.34 963.386   1
  10  -3  -2 10374.5 573.638   3
  10   3  -1-62.7883 209.954   1
  10   3  -1 94.3763 81.2186   4
  10   3   0 16018.9 831.703   4
  10   3   0 15571.8 1257.28   1
  10  -3   1 9455.93 975.852   2
  10   3   1 9661.82 978.822   1
  10   3   2 51181.5 2470.42   1
  10  -3   2 51413.0 2559.78   2
  10  -3   3 3097.72 611.742   2
  10   3   3 2956.37 540.191   1
  10   3   3 2958.66 380.669   4
  10   3   3 2305.29 396.025   3
  10  -3   4 9159.43 1032.54   2
  10   3   4 10533.6 1000.54   1
  10   3   4 9393.08 734.794   4
  10   3   4 9195.88 793.951   3
  10  -3   5 570.202 316.796   2
  10   3   5 498.649 202.185   4
  10   3   5 272.035 182.361   3
  10   3   5-49.6008 224.307   1
  10   3   6 16589.5 1288.51   1
  10  -3   6 19957.8 1501.02   4
  10   3   6 18213.2 1154.98   4
  10   3   6 15322.6 1090.11   3
  10  -3   6 16640.9 1277.39   1
  10  -3   6 17562.0 1493.40   2
  10  -3   7 3053.53 624.825   2
  10  -3   7 2992.30 579.719   4
  10   3   7 3208.41 490.674   4
  10   3   7 2740.94 517.332   1
  10  -3   7 2760.48 510.565   1
  10  -3   8 359.586 355.868   4
  10   3   8-2.22049 185.414   4
  10   3   8-82.6040 209.910   1
  10  -3   8 355.992 301.861   1
  10  -3   8-422.738 418.706   2
  10  -3   9 732.992 292.120   1
  10  -3   9 949.229 462.044   4
  10   3   9 545.692 243.860   4
  10   3   9 675.012 279.596   1
  10  -3   9 277.543 302.898   2
  10  -3  10 18176.7 1308.91   1
  10   3  10 17814.3 1361.23   4
  10  -3  10 15083.2 1536.09   2
  10  -3  11 2910.15 631.508   4
  10   3  11 2453.31 526.109   4
  10  -3  11 1785.31 579.556   2
  10  -3  12 2041.18 578.927   4
  10   3  12 1028.72 414.180   4
  10   4 -17-581.034 326.934   1
  10  -4 -17-71.8356 341.834   3
  10  -4 -16 131.310 189.586   1
  10  -4 -16-160.192 332.644   3
  10   4 -15 4225.79 742.857   1
  10  -4 -15 3587.56 673.056   1
  10  -4 -15 3213.50 695.752   3
  10  -4 -14 9984.78 1092.50   1
  10   4 -14 10177.2 1139.17   1
  10  -4 -14 8425.62 1069.85   3
  10  -4 -13 586.759 277.263   1
  10   4 -13 710.671 384.655   1
  10  -4 -13-287.031 350.079   3
  10  -4 -12 3152.72 637.182   1
  10  -4 -12 2341.63 574.141   3
  10   4 -12 2132.64 562.508   1
  10  -4 -11 716.495 367.393   1
  10  -4 -11 908.324 399.528   3
  10   4 -11 773.428 385.426   1
  10  -4 -10 2274.45 516.885   1
  10   4 -10 1889.03 272.278   4
  10  -4 -10 1939.65 465.066   3
  10   4 -10 1953.20 513.826   1
  10   4  -9 3898.08 358.279   4
  10  -4  -9 3521.36 588.131   3
  10   4  -9 3559.92 687.816   1
  10   4  -8 6118.39 430.159   4
  10  -4  -8 5944.27 715.701   3
  10   4  -8 6313.48 864.865   1
  10   4  -7 981.859 164.740   4
  10  -4  -7 652.599 271.442   3
  10   4  -7 724.514 331.583   1
  10   4  -6 331.246 95.3544   4
  10   4  -6 449.422 292.554   1
  10   4  -5 359.179 312.420   1
  10   4  -4 19066.7 1468.74   1
  10  -4  -4 19109.6 1084.98   3
  10   4  -3 191.795 222.926   1
  10   4  -3 260.532 71.5106   4
  10  -4  -3 309.728 164.760   3
  10   4  -2 1518.03 439.689   1
  10   4  -2 1814.03 192.861   4
  10   4  -1 888.193 328.333   1
  10   4  -1 817.045 143.464   4
  10   4   0 22041.8 1570.42   1
  10   4   0 22179.3 931.273   4
  10   4   1 3607.54 356.701   4
  10   4   1 3846.54 626.033   1
  10   4   2-74.8708 271.396   1
  10  -4   3 462.352 322.559   2
  10   4   3 550.368 243.619   3
  10   4   4 12415.9 1117.27   1
  10  -4   4 10811.7 1144.55   2
  10   4   4 10765.1 769.528   4
  10   4   4 8362.82 815.555   3
  10  -4   5 393.711 381.977   2
  10   4   5 134.493 146.033   4
  10   4   5-299.942 209.861   1
  10   4   5 129.721 176.139   3
  10  -4   6 426.168 315.927   2
  10   4   6 1184.00 304.427   4
  10   4   6 984.849 326.874   1
  10  -4   7 321.481 291.427   2
  10  -4   7 59.1735 292.245   4
  10   4   7 393.527 206.945   4
  10   4   7 397.759 235.723   1
  10  -4   8 7816.20 1080.69   2
  10  -4   8 8770.76 1060.29   4
  10   4   8 7877.52 877.696   1
  10   4   8 7925.78 812.266   4
  10  -4   9 2091.66 459.161   1
  10   4   9 1578.50 356.732   1
  10  -4   9 1519.51 468.785   4
  10   4   9 1752.63 426.973   4
  10  -4   9 1793.46 505.336   2
  10  -4  10 928.760 378.573   4
  10  -4  10 189.426 196.210   1
  10  -4  10 458.868 431.209   2
  10  -4  11 240.617 269.410   4
  10  -4  11 198.836 309.904   2
  10  -4  12-127.823 339.039   4
  10  -4  12-525.935 421.263   2
  10   5 -17 2041.57 530.006   1
  10  -5 -17 975.778 436.989   3
  10   5 -16 86.6524 336.704   1
  10  -5 -16 433.731 398.088   3
  10  -5 -16 719.572 363.341   1
  10  -5 -15 1709.84 430.212   1
  10   5 -15 2237.06 588.732   1
  10  -5 -15 2182.30 598.963   3
  10   5 -14 305.110 344.759   1
  10  -5 -14 529.485 395.130   3
  10  -5 -14 64.9214 233.365   1
  10   5 -13 3171.96 659.122   1
  10  -5 -13 3242.47 665.050   3
  10  -5 -13 4872.75 788.482   1
  10  -5 -12 3200.53 654.736   1
  10   5 -12 3379.68 688.255   1
  10  -5 -12 1835.26 516.851   3
  10   5 -11 814.883 344.504   1
  10  -5 -11 188.769 249.226   3
  10   5 -10 1333.77 476.162   1
  10  -5 -10 1031.15 418.806   3
  10   5  -9 9636.88 1128.51   1
  10  -5  -9 8778.52 931.618   3
  10   5  -8 1760.57 176.572   4
  10   5  -8 2657.44 590.832   1
  10  -5  -8 2116.28 487.723   3
  10  -5  -7 14014.1 1102.05   3
  10   5  -7 13767.0 1309.21   1
  10   5  -6 813.259 343.948   1
  10  -5  -6 1140.55 345.324   3
  10   5  -5 2407.69 567.965   1
  10   5  -4 3129.25 640.475   1
  10   5  -3 9183.67 1027.74   1
  10   5  -2 8407.07 966.153   1
  10   5  -1 547.932 311.944   1
  10   5   0 1080.70 156.304   4
  10   5   0 1725.83 444.627   1
  10   5   1 12644.8 655.129   4
  10   5   1 12463.6 1191.83   1
  10   5   2 7417.60 529.134   4
  10   5   2 7094.94 894.611   1
  10   5   3 975.772 378.043   1
  10   5   4 3388.68 614.582   1
  10  -5   5 11283.5 1211.07   2
  10   5   5 11241.5 1104.59   1
  10  -5   6 1110.85 398.009   2
  10   5   6 760.147 276.582   1
  10  -5   7 13641.0 1374.99   2
  10   5   7 10681.2 1042.49   1
  10  -5   8 766.199 433.906   2
  10   5   8 191.970 237.077   1
  10  -5   8 598.958 302.715   4
  10  -5   9 2099.23 625.364   2
  10   5   9 3214.02 578.666   1
  10  -5  10 3531.59 745.627   4
  10  -5  10 2035.67 640.662   2
  10  -5  11 7962.49 1116.20   4
  10  -5  11 3935.87 831.825   2
  10  -5  12-728.348 469.938   2
  10  -5  13 176.217 364.898   2
  10   6 -17 1501.51 463.360   1
  10   6 -16 3982.45 800.364   1
  10  -6 -16 3486.18 684.198   1
  10  -6 -16 3000.55 742.110   3
  10  -6 -15 2833.21 652.205   1
  10   6 -15 2403.15 637.512   1
  10  -6 -15 1431.91 489.841   3
  10  -6 -14 1006.11 434.245   1
  10   6 -14 908.122 396.732   1
  10  -6 -14 1021.73 452.106   3
  10   6 -13 33.6400 243.479   1
  10  -6 -13-348.811 349.436   3
  10   6 -12 6216.88 946.400   1
  10  -6 -12 4674.50 833.632   3
  10   6 -11 488.415 366.802   1
  10  -6 -11-72.3901 348.595   3
  10   6 -10 12485.4 1328.82   1
  10  -6 -10 11260.3 1158.62   3
  10   6  -9 4690.18 824.840   1
  10  -6  -9 4300.30 680.220   3
  10   6  -8 1161.93 433.016   1
  10  -6  -8 1358.91 410.909   3
  10   6  -7 1579.44 515.219   1
  10  -6  -7 1884.59 463.071   3
 -10  -6   6 5775.26 645.405   2
  10   6  -6 5741.10 868.247   1
  10  -6  -6 6361.69 741.876   3
  10   6  -5 9841.26 1117.91   1
  10   6  -4 2848.50 612.642   1
  10   6  -3-36.6741 232.154   1
  10   6  -2 6658.14 895.169   1
  10   6  -1 1532.07 462.699   1
  10   6   0 2272.90 534.092   1
  10   6   1 9901.34 1094.85   1
  10   6   2 4156.60 687.126   1
  10   6   3 6968.19 894.339   1
  10   6   4 4036.39 669.956   1
  10   6   5 2157.23 521.488   1
  10  -6   6 3078.71 627.195   2
  10   6   6 3711.30 661.006   1
  10  -6   7 744.061 436.362   2
  10   6   7 31.5101 197.300   1
  10  -6   8 8688.60 1176.86   2
  10   6   8 9821.49 1039.50   1
  10  -6   9 1248.59 498.457   2
  10  -6   9 2337.31 618.897   4
  10   6   9 869.699 336.969   1
  10  -6  10 1366.10 557.423   2
  10  -6  10 1195.70 457.353   4
  10  -6  11 2235.81 652.159   4
  10  -6  11-54.3979 409.278   2
  10  -6  12 3889.02 848.790   2
  10   7 -17-214.408 265.377   1
  10   7 -16 634.140 368.108   1
  10  -7 -16 274.854 407.733   3
  10   7 -15 15.0222 300.170   1
  10  -7 -15-283.037 350.411   1
  10  -7 -15 107.927 336.877   3
  10   7 -14 1099.75 497.437   1
  10  -7 -14-319.988 411.749   3
  10   7 -13 2879.63 700.700   1
  10  -7 -13 2102.25 642.987   3
  10   7 -12 6417.63 991.571   1
  10  -7 -12 6373.53 919.399   3
  10   7 -11 1765.60 543.437   1
  10  -7 -11 1512.36 445.876   3
  10   7 -10 576.260 343.927   1
  10  -7 -10 304.640 305.965   3
  10   7  -9 298.123 317.250   1
  10  -7  -9 310.143 273.771   3
  10   7  -8 4621.00 814.941   1
  10  -7  -8 5166.91 765.296   3
  10   7  -7 1175.01 464.567   1
  10   7  -6 4719.10 820.085   1
  10   7  -5 80.1058 220.099   1
  10   7  -4 2906.48 638.284   1
  10   7  -3 306.171 313.555   1
  10   7  -2 9753.72 1121.78   1
  10   7  -1 299.382 246.406   1
  10   7   0 255.459 267.848   1
  10   7   1-218.310 260.628   1
  10   7   2 3655.12 674.214   1
  10   7   3-567.928 367.028   1
  10   7   4 2641.71 577.133   1
  10   7   5 1286.16 393.560   1
  10   7   6 2212.61 543.593   1
  10   7   7 1650.86 476.974   1
  10  -7   7 1570.14 539.832   2
  10  -7   8 327.439 332.606   2
  10  -7   8 436.168 441.513   4
  10   7   8 339.676 306.474   1
  10  -7   9 798.855 491.282   2
  10  -7   9-217.889 339.352   4
  10  -7  10 418.238 332.267   2
  10  -7  10 688.616 412.600   4
  10  -7  11 322.904 402.886   2
  10   8 -16 756.721 457.637   1
  10   8 -15 1046.89 500.440   1
  10  -8 -15 1016.65 479.356   3
  10   8 -14-1044.04 496.258   1
  10  -8 -14 574.177 379.923   3
  10   8 -13 123.150 275.180   1
  10  -8 -13 331.869 335.570   3
  10   8 -12 664.021 372.063   1
  10  -8 -12 668.051 389.634   3
  10   8 -11 506.738 323.824   1
  10  -8 -11 1132.50 476.431   3
  10   8 -10 4598.52 857.545   1
  10   8  -9-74.1175 258.694   1
  10   8  -8 1059.44 442.512   1
  10   8  -7 4095.41 778.858   1
  10   8  -6 5789.12 923.616   1
  10   8  -5 8388.55 1070.73   1
  10   8  -4 1328.77 435.618   1
  10   8  -3 1106.41 419.256   1
  10   8  -2 11058.0 1242.09   1
  10   8  -1 18074.7 1589.81   1
  10   8   0-166.608 320.273   1
  10   8   1 331.483 321.867   1
  10   8   2 2435.80 591.953   1
  10   8   3 10727.2 1219.34   1
  10   8   4 3582.45 662.842   1
  10   8   5 5257.64 841.115   1
  10   8   6 932.306 385.488   1
  10   8   7 4119.42 723.798   1
  10  -8   8 4444.97 869.195   2
  10   8   8 5434.49 867.345   1
  10  -8   9 2917.05 726.719   2
  10  -8   9 4885.72 936.143   4
  10  -8  10-476.138 402.066   2
  10   9 -15 1667.51 597.589   1
  10   9 -14 3410.63 862.690   1
  10   9 -13 1740.10 647.571   1
  10   9 -12-1234.43 639.614   1
  10   9 -11 4998.60 949.362   1
  10   9 -10 1599.87 625.577   1
  10   9  -9-167.142 374.440   1
  10   9  -8 5899.90 965.460   1
  10   9  -7 2565.14 681.053   1
  10   9  -6 908.686 470.329   1
  10   9  -5 813.292 471.306   1
  10   9  -4 10358.3 1269.09   1
  10   9  -3 7781.71 1082.82   1
  10   9  -2 71.1414 282.549   1
  10   9  -1 3036.67 666.111   1
  10   9   0-190.750 402.260   1
  10   9   1 13786.6 1449.03   1
  10   9   2 2394.70 610.806   1
  10   9   3 169.445 310.907   1
  10   9   4 1438.25 522.725   1
  10   9   5 740.921 361.392   1
  10   9   6 1755.17 565.359   1
  10   9   7 3324.00 732.011   1
  10  -9   9-825.828 562.905   2
  10  10 -12 121.134 350.851   1
  10  10 -11-240.448 482.782   1
  10  10 -10 7510.03 1201.22   1
  10  10  -9 2683.28 729.230   1
  10  10  -8 2478.32 679.700   1
  10  10  -7 495.301 328.151   1
  10  10  -6 4872.90 925.365   1
  10  10  -5 4610.00 888.887   1
  10  10  -4 4061.06 854.491   1
  10  10  -3 188.429 326.923   1
  10  10  -2 766.816 461.423   1
  10  10  -1 155.409 261.452   1
  10  10   0 2633.16 648.425   1
  10  10   1-290.096 421.007   1
  10  10   2 366.331 321.188   1
  10  10   3 1333.47 485.572   1
  10  10   4 2634.41 675.067   1
  10  10   5-164.381 327.503   1
  10  10   6 53.7067 336.904   1
  10  10   7-389.890 376.802   1
  10  11  -9 2850.84 782.106   1
  10  11  -8 4938.90 1017.85   1
  10  11  -7 1782.74 727.269   1
  10  11  -6 1605.72 674.939   1
  10  11  -5 366.168 366.612   1
  10  11  -4 4636.58 976.247   1
  10  11  -3 7496.80 1182.63   1
  10  11  -2 3530.02 835.709   1
  10  11  -1 2295.46 756.665   1
  10  11   0 818.218 406.146   1
  10  11   1 2950.19 751.275   1
  10  11   2 4557.13 949.361   1
  10  11   3 118.993 362.269   1
  10  11   4 1800.22 628.172   1
  10  11   5 4199.80 922.907   1
  10  11   6 6395.07 1024.01   1
  10  12  -3 1210.00 575.074   1
  10  12  -2-665.815 577.004   1
  10  12  -1 1698.47 639.640   1
  10  12   0 485.055 354.267   1
  10  12   1 2237.71 670.420   1
  10  12   2 701.622 366.807   1
  10  12   3 3698.10 910.845   1
  10  12   4-618.160 415.365   1
[truncated: 95,389 more chars]
